# Supplementary material for: Occupation and SARS-CoV-2 seroprevalence studies: a systematic review
Source: PubMed Central journal article supplement (PMC9979591; doi:10.1136/bmjopen-2022-063771), 2023-02-28
Supplement: bmjopen-2022-063771.draft_revisions.pdf [file bmjopen-2022-063771.draft_revisions.pdf]

# BMJ Open

BMJ Open is committed to open peer review. As part of this commitment we make the peer review history of every article we publish publicly available.

When an article is published we post the peer reviewers' comments and the authors' responses online. We also post the versions of the paper that were used during peer review. These are the versions that the peer review comments apply to.

The versions of the paper that follow are the versions that were submitted during the peer review process. They are not the versions of record or the final published versions. They should not be cited or distributed as the published version of this manuscript.

BMJ Open is an open access journal and the full, final, typeset and author-corrected version of record of the manuscript is available on our site with no access controls, subscription charges or pay-per-view fees (<http://bmjopen.bmj.com>).

If you have any questions on BMJ Open's open peer review process please email [info.bmjopen@bmj.com](mailto:info.bmjopen@bmj.com)

# BMJ Open

## Occupation and SARS-CoV-2 seroprevalence studies: a systematic review

|                               |                                                                                                                                                                                                                                                                                                                                                                                                                                                                                                                                                                                                                                                                                                                                                                                                                                                                                                                                                                                       |
|-------------------------------|---------------------------------------------------------------------------------------------------------------------------------------------------------------------------------------------------------------------------------------------------------------------------------------------------------------------------------------------------------------------------------------------------------------------------------------------------------------------------------------------------------------------------------------------------------------------------------------------------------------------------------------------------------------------------------------------------------------------------------------------------------------------------------------------------------------------------------------------------------------------------------------------------------------------------------------------------------------------------------------|
| Journal:                      | <i>BMJ Open</i>                                                                                                                                                                                                                                                                                                                                                                                                                                                                                                                                                                                                                                                                                                                                                                                                                                                                                                                                                                       |
| Manuscript ID                 | bmjopen-2022-063771                                                                                                                                                                                                                                                                                                                                                                                                                                                                                                                                                                                                                                                                                                                                                                                                                                                                                                                                                                   |
| Article Type:                 | Original research                                                                                                                                                                                                                                                                                                                                                                                                                                                                                                                                                                                                                                                                                                                                                                                                                                                                                                                                                                     |
| Date Submitted by the Author: | 20-Apr-2022                                                                                                                                                                                                                                                                                                                                                                                                                                                                                                                                                                                                                                                                                                                                                                                                                                                                                                                                                                           |
| Complete List of Authors:     | Boucher, Emily; University of Calgary Cumming School of Medicine, Cao, Christian; University of Calgary, Cumming School of Medicine D'Mello, Sean; University of Waterloo<br>Duarte, Nathan; McGill University, Faculty of Engineering<br>Donnici, Claire; University of Calgary, Cumming School of Medicine<br>Duarte, Natalie; University of Toronto, Faculty of Arts and Science<br>Bennett, Graham; McGill University, Department of Economics Consortium, SeroTracker ; University of Calgary<br>Adishes, Anil; Unity Health Toronto, St. Michael's Hospital; University of Toronto, Division of Occupational Medicine<br>Arora, Rahul; Oxford University, Institute of Biomedical Engineering<br>Kodama, David; Unity Health Toronto, St. Michael's Hospital; University of Toronto Department of Medicine, Division of Emergency Medicine<br>Bobrovitz, Niklas; University of Toronto Temerty Faculty of Medicine; University of Calgary, Department of Critical Care Medicine |
| Keywords:                     | COVID-19, Public health < INFECTIOUS DISEASES, OCCUPATIONAL & INDUSTRIAL MEDICINE                                                                                                                                                                                                                                                                                                                                                                                                                                                                                                                                                                                                                                                                                                                                                                                                                                                                                                     |
|                               |                                                                                                                                                                                                                                                                                                                                                                                                                                                                                                                                                                                                                                                                                                                                                                                                                                                                                                                                                                                       |

SCHOLARONE™  
Manuscripts

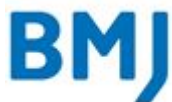

I, the Submitting Author has the right to grant and does grant on behalf of all authors of the Work (as defined in the below author licence), an exclusive licence and/or a non-exclusive licence for contributions from authors who are: i) UK Crown employees; ii) where BMJ has agreed a CC-BY licence shall apply, and/or iii) in accordance with the terms applicable for US Federal Government officers or employees acting as part of their official duties; on a worldwide, perpetual, irrevocable, royalty-free basis to BMJ Publishing Group Ltd ("BMJ") its licensees and where the relevant Journal is co-owned by BMJ to the co-owners of the Journal, to publish the Work in this journal and any other BMJ products and to exploit all rights, as set out in our [licence](#).

The Submitting Author accepts and understands that any supply made under these terms is made by BMJ to the Submitting Author unless you are acting as an employee on behalf of your employer or a postgraduate student of an affiliated institution which is paying any applicable article publishing charge ("APC") for Open Access articles. Where the Submitting Author wishes to make the Work available on an Open Access basis (and intends to pay the relevant APC), the terms of reuse of such Open Access shall be governed by a Creative Commons licence – details of these licences and which [Creative Commons](#) licence will apply to this Work are set out in our licence referred to above.

Other than as permitted in any relevant BMJ Author's Self Archiving Policies, I confirm this Work has not been accepted for publication elsewhere, is not being considered for publication elsewhere and does not duplicate material already published. I confirm all authors consent to publication of this Work and authorise the granting of this licence.

## Occupation and SARS-CoV-2 seroprevalence studies: a systematic review

Emily Boucher,<sup>1</sup> Christian Cao<sup>1</sup>, Sean D’Mello,<sup>2</sup> Nathan Duarte,<sup>3</sup> Claire Donnici<sup>1</sup>, Natalie Duarte,<sup>4</sup> Graham Bennett,<sup>5</sup> SeroTracker Consortium, Anil Adisesh,<sup>6-8</sup> Rahul K. Arora,<sup>1,9</sup> David Kodama,<sup>6,10</sup> Niklas Bobrovitz<sup>11,12</sup>

1. Cumming School of Medicine, University of Calgary, Calgary, AB, Canada
2. Faculty of Engineering, University of Waterloo, Waterloo, ON, Canada
3. Faculty of Engineering, McGill University, Montreal, QC, Canada
4. Faculty of Arts and Science, University of Toronto, ON, Canada
5. Department of Economics, Faculty of Arts, McGill University, Montreal, QC, Canada
6. St. Michael’s Hospital, Unity Health Toronto, Toronto, ON, Canada
7. Division of Occupational Medicine, Department of Medicine, University of Toronto, Toronto, ON, Canada
8. Canadian Health Solutions, Saint John, NB, Canada
9. Institute of Biomedical Engineering, University of Oxford, Oxford, UK
10. Division of Emergency Medicine, Department of Medicine, University of Toronto, Toronto, ON, Canada
11. Temerty Faculty of Medicine, University of Toronto, Toronto, ON, Canada
12. Department of Critical Care Medicine, University of Calgary, Calgary, AB, Canada

\*Correspondence to Dr. Niklas Bobrovitz, Temerty Faculty of Medicine, University of Toronto, Toronto, ON, Canada; [niklas.bobrovitz@mail.utoronto.ca](mailto:niklas.bobrovitz@mail.utoronto.ca)

1  
2  
3  
4  
5  
6 **Word Count** 1179

7  
8 **Key Words** Covid-19, Infectious diseases, Occupational & industrial medicine

9  
10  
11 **Key Messages**

12  
13 **1. What is already known about this subject?**

14  
15 Worldwide, workplace outbreaks of COVID-19 have been frequent, and some of the  
16 largest reported. Accurate data on the risks of infection with SARS-CoV-2 infection and  
17 other respiratory infections across a variety of occupations are needed to inform public  
18 health interventions.  
19

20  
21 **2. What are the new findings?**

22  
23 During the first year of the pandemic, a large number of seroprevalence studies covering  
24 a broad range of occupations globally were published. Results suggest considerable  
25 differences in the risk of SARS-CoV-2 infection between occupations.  
26  
27

28  
29 **3. How might this impact on policy or clinical practice in the foreseeable future?**

30  
31 Occupation appears to be an important correlate of SARS-CoV-2 infection. Additional  
32 high-quality, well-powered serosurveys would improve our understanding of the  
33 occupational risks of SARS-CoV-2 and other respiratory infections and should be  
34 considered an essential component of the pandemic response.  
35

36 **Key Messages**  
37  
38  
39  
40  
41  
42  
43  
44  
45  
46  
47  
48  
49  
50  
51  
52  
53  
54  
55  
56  
57  
58  
59  
60

## ABSTRACT

**Objective.** To describe and synthesize studies of SARS-CoV-2 seroprevalence by occupation prior to the widespread vaccine rollout.

**Methods.** We identified studies of occupational seroprevalence from a living systematic review (PROSPERO CRD42020183634). Electronic databases, gray literature, and news media were searched for studies published January-December 2020. Seroprevalence estimates and a free text description of the occupation were extracted and classified according to the Standard Occupational Classification (SOC) 2010 system using a machine-learning algorithm. Due to heterogeneity, results were synthesized narratively.

**Results.** We identified 196 studies including 591,940 participants from 38 countries. Most studies (n=162; 83%) were conducted locally vs regionally or nationally. Sample sizes were generally small (median=220 participants per occupation) and 135 studies (69%) were at a high risk of bias. One or more estimates were available for 21/23 major SOC occupation groups, but over half of the estimates identified (n=359/600) were for healthcare-related occupations. 'Personal Care and Service Occupations' (median 22% [IQR 9-28%]; n=14) had the highest median seroprevalence.

**Conclusions.** Many seroprevalence studies covering a broad range of occupations were published in the first year of the pandemic. Results suggest considerable differences in seroprevalence between occupations, although few large, high-quality studies were done. Well-designed studies are required to improve our understanding of the occupational risk of SARS-CoV-2 and should be considered as an element of pandemic preparedness for future respiratory pathogens.

## INTRODUCTION

Occupation is a social determinant of health and an important risk factor for SARS-CoV-2 infection. Essential workers in health and social care occupations have an increased risk of COVID-19 compared to non-essential workers, but the risks for other occupations are not well defined.<sup>1-3</sup> Studies using diagnostic or rapid testing results from health system and administrative data to examine occupational COVID-19 risk are affected by variable testing rates and access (e.g. due to workplace testing, paid sick leave, geographic, socio-economic factors). Few high-quality, prospective studies using frequent, serial diagnostic or rapid testing covering a broad range of occupations having been conducted.<sup>4</sup>

Serologic testing for SARS-CoV-2 antibodies provides evidence of previous infection and/or vaccination depending on vaccination status and the specific antigens targeted and can be used to obtain more accurate estimates of the cumulative incidence of infection.<sup>5</sup> Accurate data on the occupational risks of COVID-19 and other respiratory infections are essential for informing compliance with workplace safety regulations, transmission control measures and resource allocation (testing, personal protective equipment (PPE), etc.). The objectives of this review were to describe and synthesize studies of SARS-CoV-2 seroprevalence across a broad range of occupations globally prior to the widespread rollout of vaccines.

## METHODS

We identified studies of occupational seroprevalence from a living systematic review (PROSPERO CRD42020183634) of >1000 seroprevalence studies.<sup>6</sup> In brief, electronic databases, grey literature, and news media were searched for cohort or cross-sectional studies

1  
2  
3 reporting antibody testing for SARS-CoV-2. Records were screened independently, in duplicate.  
4  
5 We restricted eligibility to studies that in English, French or that were machine-translatable and  
6  
7 published January-December 2020 before vaccines were rolled-out, because differential  
8  
9 vaccination rates by occupation would obscure results. We extracted seroprevalence estimates  
10  
11 with a free-text description for each occupation. If multiple estimates were reported, the most  
12  
13 recent estimate using laboratory-based methods (e.g. ELISA), and anti-spike and/or IgG  
14  
15 antibodies were prioritized, because non-IgG and anti-nucleocapsid antibodies may decline more  
16  
17 rapidly.<sup>7</sup> Study-level risk of bias was assessed with a modified Joanna Briggs Institute Checklist  
18  
19 for Prevalence Studies (**Table S1**).<sup>8</sup>  
20  
21  
22  
23  
24  
25

26 For each seroprevalence estimate, we identified the relevant Standard Occupational  
27  
28 Classification (SOC) 2010 codes by applying the National Institute for Occupational Safety &  
29  
30 Health (NIOSH) Industry and Occupation Computerized Coding System (NIOCCS) to  
31  
32 occupation descriptions.<sup>9</sup> NIOCCS was chosen, because most studies were conducted in the  
33  
34 USA. Coding was manually verified if there was insufficient information for classification or the  
35  
36 probability of correct classification was <0.8. Anticipating substantial heterogeneity and an  
37  
38 insufficient number of estimates relative to covariates for meta-regression, we planned to  
39  
40 summarize data using the median/IQR.  
41  
42  
43  
44  
45  
46

47 **Patient and Public Involvement:** It was not possible or appropriate to involve patients or the  
48  
49 public in this study.  
50  
51  
52  
53  
54  
55  
56  
57  
58  
59  
60



## RESULTS

We identified 196 studies of occupational seroprevalence conducted in 2020 during the first and second waves of the pandemic. There were 591,940 participants from 38 countries, including the USA (n=44 studies), UK (n=16) and Italy (n=15). Most studies (n=162; 83%) were conducted locally (e.g. city, county) as opposed to regionally (e.g. state; n=20; 10%) or nationally (n=14; 7%). Most were restricted to one occupational group (n=103), limiting direct comparisons (i.e. using the same reference group). Sample sizes were often small (median=220, IQR 64-568 participants). Overall, 135 studies (69%) were at a high risk of bias, 47 moderate (24%), 2 low (1%) and 12 unclear (6%). Common reasons for bias were inadequate statistical analysis (i.e. no adjustment for test or sample characteristics; 92%), non-probability sampling (74%), and small sample-size (46%).

At least one estimate was available for all 23 major SOC occupation groups, except for 'Legal' and 'Military-Specific' occupations (**Figure 1**; all studies). Over half of the 600 estimates identified (n=359) were for healthcare-related occupations. For SOC groups with three or more estimates, the highest median seroprevalence was reported for 'Personal Care and Service Occupations' (median 22% [IQR 9-28%]; n=14, e.g. 'Personal Care Aids'). The next highest was reported for 'Building and Grounds Cleaning and Maintenance' occupations (11% [3-22%]; n=17, e.g. 'Maids and Housekeeping Cleaners'), and 'Healthcare Support' (11% [2-20%]; n=39, e.g. 'Nursing Assistants') occupations. The lowest median seroprevalence was 1% (0-11%; n=6, e.g. 'Athletes') for 'Arts, Design, Entertainment, Sports, and Media Occupations.' Individual estimates are listed in **Table S2**.

## DISCUSSION

This review is the first comprehensive synthesis of occupational COVID-19 seroprevalence studies world-wide. We identified 196 studies representing 21 out of 23 major SOC groups conducted during the first and second waves of the SARS-CoV-2 pandemic in 2020, prior to the widespread rollout of vaccines, and described occupational groups with high seroprevalence.

Seroprevalence studies may estimate the cumulative incidence of infection more accurately than diagnostic testing studies when access to testing is variable.<sup>2,4</sup> The data identified suggest considerable differences in seroprevalence by occupation, though we did not statistically test for differences due to considerable variation in geography, study dates and workplace determinants of infection (e.g. PPE, ventilation). ‘Caring and Personal Service’ occupations had the highest median seroprevalence (22%), which was four-times higher than the unemployed (5%) and median seroprevalence across all occupational groups (5%). The UK Office for National Statistics reported a slightly lower mean risk of a positive diagnostic or rapid test for COVID-19 across 25 occupational groups of 4%,<sup>10</sup> but the discrepancy between the true cumulative incidence and confirmed infections is likely greater in regions with less access to testing: national, population-based serosurveys have estimated there are 10-20 serologically identifiable cases per one confirmed case.<sup>6</sup>

In future pandemics, large, well-reported, high-quality seroprevalence studies across a broad range of occupations are needed at an early stage to inform appropriate workplace policy. It has been suggested that 20% of the US workforce was exposed to disease or infection at work at

1  
2  
3 least once a month prior to the pandemic.<sup>11</sup> Public health agencies require accurate data on the  
4 occupational risks of respiratory infections, including SARS-CoV-2, to inform compliance with  
5 workplace safety regulations, transmission control measures and allocate limited resources (e.g.  
6 testing, personal protective equipment and vaccines) during outbreaks and pandemics. For  
7 governments, there are also issues of occupational disease recognition and compensation to be  
8 considered. As such, public health agencies and governments may be best positioned to  
9 coordinate these types of studies, as opposed to academic institutions,<sup>6</sup> which led the majority of  
10 serosurveys in the first year of the pandemic.  
11  
12  
13  
14  
15  
16  
17  
18  
19  
20  
21  
22  
23

### 24 **Strengths and Limitations**

25  
26 Despite the large number of studies of occupational seroprevalence conducted, many studies had  
27 methodological limitations. Only two studies were at a low risk of bias and most occupational  
28 subgroups had small sample sizes (median 220 participants). Many were limited to one major  
29 SOC group (n=103 studies), which precluded comparisons. Detailed descriptions of occupations  
30 were often lacking, potentially contributing to coding errors, and workplace determinants of  
31 infection (e.g. use of PPE) were poorly reported.  
32  
33  
34  
35  
36  
37  
38  
39  
40  
41

42 In conclusion, our review shows that a large number of seroprevalence studies covering a broad  
43 range of occupations were published in the first year of the pandemic. Results suggest  
44 considerable differences in seroprevalence between occupations, although few large, well-  
45 reported, high-quality studies were done. Carefully-designed, adequately powered  
46 seroprevalence studies with coverage of a broad range of occupations could improve our  
47  
48  
49  
50  
51  
52  
53  
54  
55  
56  
57  
58  
59  
60

1  
2  
3 understanding of the occupational risk of SARS-CoV-2 and other respiratory infections and  
4  
5 should be considered an element of pandemic preparedness.  
6  
7  
8  
9  
10  
11  
12  
13  
14  
15  
16  
17  
18  
19  
20  
21  
22  
23  
24  
25  
26  
27  
28  
29  
30  
31  
32  
33  
34  
35  
36  
37  
38  
39  
40  
41  
42  
43  
44  
45  
46  
47  
48  
49  
50  
51  
52  
53  
54  
55  
56  
57  
58  
59  
60

### **Acknowledgements and funding disclosure**

SeroTracker receives funding for SARS-CoV-2 seroprevalence study evidence synthesis from the Public Health Agency of Canada through Canada's COVID-19 Immunity Task Force, the World Health Organization Health Emergencies Programme, the Robert Koch Institute, and the Canadian Medical Association Joule Innovation Fund. No funding source had any role in the design of this study, its execution, analyses, interpretation of the data, or decision to submit results. This manuscript does not necessarily reflect the views of the World Health Organization or any other funder.

### **Statement of author's contributions**

This secondary analysis of the SeroTracker database was conceived by NB, EB, DK and AA. Senior authors on this paper were NB, DK, RA and AA. The protocol was developed by EB, NB and DK. Data cleaning was performed by CC, CD, ND, SD and EB and verification by EB, SD, ND and GB. Analysis was performed by EB and RA. The first draft of the manuscript was written by EB and revised by EB, RA, NB, ND, GB, SD, CC, AA, DK. The SeroTracker Consortium maintained the living systematic review database used in the study. All authors reviewed and agreed to the findings, and also provided critical revisions to the paper.

### **Disclosure of potential and actual conflicts of interest**

RKA was previously a Technical Consultant for the Bill and Melinda Gates Foundation Strategic Investment Fund, is a minority shareholder of Alethea Medical, and was a former Senior Policy Advisor at Health Canada. Each of these relationships is unrelated to the present work.

1  
2  
3 JP reports grants to his institution from MedImmune, Sanofi Pasteur, Merck and AbbVie, and  
4  
5 personal fees for lectures from AbbVie and Astra-Zeneca, all outside of the submitted work.  
6  
7  
8  
9

10 MPC reports grants from McGill Interdisciplinary Initiative in Infection and Immunity, grants  
11  
12 from Canadian Institutes of Health Research, during the conduct of the study; personal fees from  
13  
14 GEn1E Lifesciences, personal fees from nplex biosciences, personal fees from Kanvas  
15  
16 biosciences, personal fees from AstraZeneca, non-financial support from Cidara therapeutics,  
17  
18 non-financial support from Scynexis, Inc., non-financial support from Amplyx Pharmaceuticals,  
19  
20 outside the submitted work. In addition, MPC has a patent for methods detecting tissue damage,  
21  
22 graft versus host disease, and infections using cell-free DNA profiling pending, a patent for  
23  
24 methods assessing the severity and progression of SARS-CoV-2 infections using cell-free DNA  
25  
26 pending, a patent for rapid identification of antimicrobial resistance and other microbial  
27  
28 phenotypes using highly-multiplexed fluorescence in situ hybridization pending, and a patent  
29  
30 highly multiplexed detection of gene expression with hybridization chain reaction pending, all  
31  
32 outside the submitted work.  
33  
34  
35  
36  
37  
38

39 **Ethics approval:** Not applicable. This study did not involve human participants or animals.  
40

41  
42 **Dating sharing:** Data included in the analysis is available in Table S2 or from  
43 <https://serotracker.com>.  
44  
45  
46  
47  
48  
49  
50  
51  
52  
53  
54  
55  
56  
57  
58  
59  
60

## REFERENCES

1. Magnusson K, Nygard KM, Vold L, Telle KE. Occupational risk of COVID-19 in the 1st vs 2nd wave of infection. medRxiv. 2020 Jan 1.
2. Mutambudzi M, Niedwiedz C, Macdonald EB, Leyland A, Mair F, Anderson J, Celis-Morales C, Cleland J, Forbes J, Gill J, Hastie C. Occupation and risk of severe COVID-19: prospective cohort study of 120 075 UK Biobank participants. *Occupational and Environmental Medicine*. 2021 May 1;78(5):307-14.
3. Nguyen LH, Drew DA, Graham MS, Joshi AD, Guo CG, Ma W, Mehta RS, Warner ET, Sikavi DR, Lo CH, Kwon S. Risk of COVID-19 among front-line health-care workers and the general community: a prospective cohort study. *The Lancet Public Health*. 2020 Sep 1;5(9):e475-83.
4. Duarte N, D’Mello S, Duarte NA, Rocco S, Van Wyk J, Pillai AA, Liu M, Williamson T, Arora RK. Uptake of SARS-CoV-2 workplace testing programs, March 2020 to March 2021. medRxiv. 2021 Jan 1.
5. Duarte N, Yanes-Lane M, Arora RK, Bobrovitz N, Liu M, Bego MG, Yan T, Cao C, Gurry C, Hankins CA, Cheng MP. Adapting Serosurveys for the SARS-CoV-2 Vaccine Era. *Open Forum Infect Dis*. 2021 Dec 23;9(2):ofab632.
6. Bobrovitz N, Arora RK, Cao C, Boucher E, Liu M, Donnici C, Yanes-Lane M, Whelan M, Perlman-Arrow S, Chen J, Rahim H. Global seroprevalence of SARS-CoV-2 antibodies: a systematic review and meta-analysis. *PloS one*. 2021 Jun 23;16(6):e0252617.
7. Isho B, Abe KT, Zuo M, Jamal AJ, Rathod B, Wang JH, et al. Persistence of serum and saliva antibody responses to SARS-CoV-2 spike antigens in COVID-19 patients. *Sci Immunol*. 2020 Oct 8;5(52):eabe5511.
8. Munn Z, Moola S, Lisy K, Riitano D, Tufanaru C. Methodological guidance for systematic reviews of observational epidemiological studies reporting prevalence and incidence data. *Int J Evid Based Healthc*. 2015;13(3):147–153.
9. NIOSH (2021). NIOSH Industry and Occupation Computerized Coding System (NIOCCS). U.S. Department of Health and Human Services, Public Health Service, Centers for Disease Control and Prevention, National Institute for Occupational Safety

1  
2  
3 and Health, Division of Field Studies & Engineering, Health Informatics Branch.  
4 <https://csams.cdc.gov/nioccs/About.aspx>. Date accessed Sept 1, 2021.  
5  
6

- 7  
8 10. Office for National Statistics. Coronavirus (COVID-19) Infection Survey: characteristics  
9 of people testing positive for COVID-19 in England. 2021 Feb 22. Available from:  
10 [https://www.ons.gov.uk/peoplepopulationandcommunity/healthandsocialcare/conditionsa  
11 nddiseases/articles/coronaviruscovid19infectionsinthecommunityinengland/characteristic  
12 sofpeopletestingpositiveforcovid19inengland22february2021](https://www.ons.gov.uk/peoplepopulationandcommunity/healthandsocialcare/conditionsanddiseases/articles/coronaviruscovid19infectionsinthecommunityinengland/characteristicsofpeopletestingpositiveforcovid19inengland22february2021)  
13  
14  
15 11. Baker MG, Peckham TK, Seixas NS. Estimating the burden of United States workers  
16 exposed to infection or disease: a key factor in containing risk of COVID-19 infection.  
17 PloS one. 2020 Apr 28;15(4):e0232452.  
18  
19  
20  
21  
22  
23  
24  
25  
26  
27  
28  
29  
30  
31  
32  
33  
34  
35  
36  
37  
38  
39  
40  
41  
42  
43  
44  
45  
46  
47  
48  
49  
50  
51  
52  
53  
54  
55  
56  
57  
58  
59  
60



1  
2  
3 **Figure Legends**  
4  
5  
6  
7

8 **Figure 1.** Seroprevalence by SOC 2010 major occupation group. \*Estimates are a mix of  
9  
10 ‘Healthcare Practitioners and Technical Occupations’ and ‘Healthcare Support Occupations’ (see  
11  
12 next page)  
13  
14  
15

16  
17 **Table S1.** Modified Joanna Briggs Institute Risk of Bias Tool (supplementary files)  
18  
19  
20

21 **Table S2.** Summary of included studies (supplementary files)  
22  
23  
24  
25  
26  
27  
28  
29  
30  
31  
32  
33  
34  
35  
36  
37  
38  
39  
40  
41  
42  
43  
44  
45  
46  
47  
48  
49  
50  
51  
52  
53  
54  
55  
56  
57  
58  
59  
60

| SOC 2010 Major Occupation Group                                         | Total     |           | BMJ Open              | Median, IQR    |                    | Seroprevalence % |                  | Page No. of 109 |
|-------------------------------------------------------------------------|-----------|-----------|-----------------------|----------------|--------------------|------------------|------------------|-----------------|
|                                                                         | Estimates | Countries | Study dates, midpoint | Sample size    | (Median, IQR)      | (Scale 0-75%)    | Low-Moderate RoB |                 |
| 1 Architecture and Engineering Occupations (17-0000)                    | 1         | 1         | 15/08 (15/08-15/08)   | 21 (21-21)     | 42.9 (42.9-42.9)   |                  | 0 (0%)           |                 |
| 2 Personal Care and Service Occupations (39-0000)                       | 14        | 7         | 03/05 (02/04-02/06)   | 127 (54-302)   | 21.5 (9.32-27.76)  |                  | 3 (21%)          |                 |
| 3 Installation, Maintenance, and Repair Occupations (49-0000)           | 1         | 1         | 19/06 (19/06-19/06)   | 134 (134-134)  | 16.4 (16.4-16.4)   |                  | 0 (0%)           |                 |
| 4 Building and Grounds Cleaning and Maintenance Occupations (37-0000)   | 17        | 8         | 13/07 (09/06-16/08)   | 102 (42-226)   | 10.8 (3.3-21.7)    |                  | 6 (35%)          |                 |
| 5 Healthcare Support Occupations (31-0000)                              | 39        | 12        | 05/06 (19/05-21/06)   | 263 (122-562)  | 10.7 (2-20.05)     |                  | 12 (31%)         |                 |
| 6 Business and Financial Operations Occupations (13-0000)               | 2         | 2         | 05/07 (18/06-22/07)   | 462 (252-671)  | 8.27 (5.3-11.23)   |                  | 2 (100%)         |                 |
| 8 Management Occupations (11-0000)                                      | 10        | 6         | 17/06 (01/05-02/08)   | 44 (23-145)    | 8.17 (6.7-19.93)   |                  | 3 (30%)          |                 |
| 9 Food Preparation and Serving Related Occupations (35-0000)            | 6         | 4         | 17/06 (11/05-23/07)   | 58 (12-108)    | 6.35 (2.37-24.03)  |                  | 2 (33%)          |                 |
| 10 Healthcare Practitioners and Technical Occupations (29-0000)         | 222       | 23        | 13/06 (13/05-13/07)   | 215 (64-482)   | 5.91 (1.83-11.71)  |                  | 84 (38%)         |                 |
| 11 Healthcare Practitioners and Technical Occupations, 5-digit codes**  |           |           |                       |                |                    |                  |                  |                 |
| 12 Miscellaneous Health Technologists and Technicians                   | 4         | 3         | 26/08 (09/08-12/09)   | 60 (20-121)    | 12.96 (9.09-27.54) |                  | 1 (25%)          |                 |
| 13 Registered Nurses                                                    | 78        | 18        | 05/06 (05/05-05/07)   | 329 (71-1000)  | 8.44 (3.68-15.5)   |                  | 22 (28%)         |                 |
| 14 Clinical Laboratory Technologists and Technicians                    | 18        | 12        | 15/06 (19/05-11/07)   | 204 (86-284)   | 6.22 (2.07-11.94)  |                  | 12 (67%)         |                 |
| 16 Physicians and Surgeons                                              | 65        | 21        | 09/06 (10/05-09/07)   | 214 (59-564)   | 5.88 (1.85-11.8)   |                  | 23 (35%)         |                 |
| 17 Emergency Medical Technicians and Paramedics                         | 9         | 6         | 13/06 (27/05-30/06)   | 157 (56-243)   | 5.41 (5.2-11)      |                  | 4 (44%)          |                 |
| 18 Therapists                                                           | 15        | 4         | 08/06 (19/05-28/06)   | 121 (61-235)   | 3.75 (0-9.45)      |                  | 7 (47%)          |                 |
| 19 Physician Assistants                                                 | 9         | 2         | 27/06 (26/05-28/07)   | 230 (156-320)  | 3.48 (0.64-9.43)   |                  | 3 (33%)          |                 |
| 21 Pharmacists                                                          | 9         | 7         | 29/06 (14/06-14/07)   | 113 (29-213)   | 0.5 (0-3.45)       |                  | 4 (44%)          |                 |
| 22 Healthcare Occupations (mixed)*                                      | 94        | 25        | 05/06 (29/04-12/07)   | 375 (110-1012) | 5.66 (2.35-11.6)   |                  | 23 (24%)         |                 |
| 23 Sales and Related Occupations (41-0000)                              | 23        | 8         | 21/08 (22/06-19/10)   | 643 (236-1184) | 5.3 (1.2-8.8)      |                  | 6 (26%)          |                 |
| 24 Education, Training, and Library Occupations (25-0000)               | 6         | 5         | 05/07 (12/06-27/07)   | 238 (73-1305)  | 5.07 (2.71-17.22)  |                  | 3 (50%)          |                 |
| 25 Farming, Fishing, and Forestry Occupations (45-0000)                 | 3         | 3         | 13/07 (25/06-30/07)   | 80 (66-100)    | 5 (2.5-5)          |                  | 1 (33%)          |                 |
| 26 Not employed (mixed)*                                                | 37        | 14        | 23/06 (12/05-04/08)   | 382 (116-905)  | 4.9 (2.7-14.97)    |                  | 28 (76%)         |                 |
| 28 Office and Administrative Support Occupations (43-0000)              | 39        | 18        | 14/06 (18/05-11/07)   | 120 (32-522)   | 4.88 (1.36-13.36)  |                  | 20 (51%)         |                 |
| 29 First responders (mixed)*                                            | 6         | 1         | 18/05 (13/05-22/05)   | 219 (72-599)   | 4.67 (1.6-7.34)    |                  | 1 (17%)          |                 |
| 30 Community and Social Service Occupations (21-0000)                   | 6         | 2         | 30/05 (18/05-11/06)   | 104 (49-188)   | 4.45 (2.13-6.1)    |                  | 1 (17%)          |                 |
| 32 Protective Service Occupations (33-0000)                             | 28        | 9         | 04/07 (21/05-16/08)   | 190 (46-555)   | 4.29 (2.17-7.47)   |                  | 6 (21%)          |                 |
| 33 Transportation and Material Moving Occupations (53-0000)             | 23        | 7         | 08/08 (08/06-08/10)   | 230 (80-364)   | 3.5 (1.8-11.8)     |                  | 8 (35%)          |                 |
| 34 Life, Physical, and Social Science Occupations (19-0000)             | 11        | 7         | 06/07 (11/06-30/07)   | 343 (174-570)  | 2.6 (1.66-6.46)    |                  | 4 (36%)          |                 |
| 35 Production Occupations (51-0000)                                     | 4         | 3         | 23/05 (26/04-19/06)   | 764 (342-1132) | 1.52 (1.45-4.93)   |                  | 2 (50%)          |                 |
| 36 Arts, Design, Entertainment, Sports, and Media Occupations (27-0000) | 6         | 5         | 07/07 (04/06-09/08)   | 164 (47-823)   | 1.39 (0.18-11.02)  |                  | 3 (50%)          |                 |
| 38 Computer and Mathematical Occupations (15-0000)                      | 1         | 1         | 03/05 (03/05-03/05)   | 47 (47-47)     | 0 (0-0)            |                  | 1 (100%)         |                 |
| 39 Construction and Extraction Occupations (47-0000)                    | 1         | 1         | 03/05 (03/05-03/05)   | 42 (42-42)     | 0 (0-0)            |                  | 1 (100%)         |                 |

**Supplementary File I.** List of all estimates, included studies and references

| SOC 2010 Major Group  | Study                              | N      | SOC 2010 Occupation Title | Study Type                                                                        | Study Dates   | Country                  | Serum positive prevalence (95% CIs) | Overall Risk of Bias (JBI) |
|-----------------------|------------------------------------|--------|---------------------------|-----------------------------------------------------------------------------------|---------------|--------------------------|-------------------------------------|----------------------------|
| Not employed (mixed)* | Merkely et al., 2020 <sup>1</sup>  | n=209  | Homemaker (Unpaid)        | Cross-sectional survey                                                            | 05/01 - 05/16 | Hungary                  | 0.73% (0-1.74%)                     | Moderate                   |
| Not employed (mixed)* | Siddiqui et al., 2020 <sup>2</sup> | n=37   | Homemaker (Unpaid)        | Prospective cohort                                                                | 04/15 - 08/15 | India                    | 18.9%                               | High                       |
| Not employed (mixed)* | Biggs et al., 2020 <sup>3</sup>    | n=157  | Retired (Unpaid)          | Cross-sectional survey                                                            | 04/28 - 05/03 | United States of America | 1.91%                               | Moderate                   |
| Not employed (mixed)* | Carrat et al., 2020 <sup>4</sup>   | n=5381 | Retired (Unpaid)          | Prospective cohort                                                                | 05/04 - 06/23 | France                   | 4.3% (3.5-5%)                       | Moderate                   |
| Not employed (mixed)* | Merkely et al., 2020 <sup>1</sup>  | n=2767 | Retired (Unpaid)          | Cross-sectional survey                                                            | 05/01 - 05/16 | Hungary                  | 1.09% (0.66-1.52%)                  | Moderate                   |
| Not employed (mixed)* | Richard et al., 2020 <sup>5</sup>  | n=1635 | Retired (Unpaid)          | Cross-sectional survey                                                            | 04/06 - 06/30 | Switzerland              | 4.3%                                | Low                        |
| Not employed (mixed)* | Siddiqui et al., 2020 <sup>2</sup> | n=10   | Retired (Unpaid)          | Prospective cohort                                                                | 04/15 - 08/15 | India                    | 20%                                 | High                       |
| Not employed (mixed)* | Alemu et al., 2020 <sup>6</sup>    | n=32   | Student (Unpaid)          | Cross-sectional survey                                                            | 04/23 - 04/28 | Ethiopia                 | 15.6%                               | Moderate                   |
| Not employed (mixed)* | Biggs et al., 2020 <sup>3</sup>    | n=16   | Student (Unpaid)          | Cross-sectional survey                                                            | 04/28 - 05/03 | United States of America | 12.5%                               | Moderate                   |
| Not employed (mixed)* | Brehm et al., 2020 <sup>7</sup>    | n=73   | Student (Unpaid)          | Cross sectional study with prospective cohort follow up of a subset of the sample | 03/20 - 07/17 | Germany                  | 2.7%                                | Moderate                   |
| Not employed (mixed)* | Carrat et al., 2020 <sup>4</sup>   | n=81   | Student (Unpaid)          | Prospective cohort                                                                | 05/04 - 06/23 | France                   | 7.2% (0.1-12.6%)                    | Moderate                   |

|                                  |                                        |        |                                                    |                        |               |                            |                    |          |
|----------------------------------|----------------------------------------|--------|----------------------------------------------------|------------------------|---------------|----------------------------|--------------------|----------|
| Not employed (mixed)*            | Iversen et al., 2020 <sup>8</sup>      | n=688  | Student (Unpaid)                                   | Cross-sectional survey | 04/15 - 04/22 | Denmark                    | 14.97%             | Low      |
| Not employed (mixed)*            | Lumley et al., 2020 <sup>9</sup>       | n=620  | Student (Unpaid)                                   | Prospective cohort     | 04/23 - 11/30 | The United Kingdom         | 6.77%              | Moderate |
| Not employed (mixed)*            | Merkely et al., 2020 <sup>1</sup>      | n=774  | Student (Unpaid)                                   | Cross-sectional survey | 05/01 - 05/16 | Hungary                    | 0.69% (0-1.49%)    | Moderate |
| Not employed (mixed)*            | Richard et al., 2020 <sup>5</sup>      | n=666  | Student (Unpaid)                                   | Cross-sectional survey | 04/06 - 06/30 | Switzerland                | 10.5%              | Low      |
| Not employed (mixed)*            | Shakiba et al., 2020 <sup>10</sup>     | n=114  | Student (Unpaid)                                   | Cross-sectional survey | 04/11 - 04/19 | Iran (Islamic Republic of) | 17.5% (11.3-23.7%) | Moderate |
| Not employed (mixed)*            | Siddiqui et al., 2020 <sup>2</sup>     | n=14   | Student (Unpaid)                                   | Prospective cohort     | 04/15 - 08/15 | India                      | 21.4%              | High     |
| Not employed (mixed)*            | Tilley et al., 2020 <sup>11</sup>      | n=790  | Student (Unpaid)                                   | Cross-sectional survey | 04/29 - 05/08 | United States of America   | 4% (3-5.1%)        | Moderate |
| Not employed (mixed)*            | Tsitsilonis et al., 2020 <sup>12</sup> | n=1395 | Student (Unpaid)                                   | Cross-sectional survey | 06/15 - 07/15 | Greece                     | 0.42% (0.03-1.5%)  | Moderate |
| Not employed (mixed)*            | Arnaldo et al., 2020 <sup>13</sup>     | n=513  | Military, Rank Not Specified                       | Cross-sectional survey | 07/06 - 07/13 | Mozambique                 | 3.7%               | High     |
| Not employed (mixed)*            | Arnaldo et al., 2020 <sup>14</sup>     | n=116  | Military, Rank Not Specified                       | Cross-sectional survey | 11/02 - 11/12 | Mozambique                 | 1.7%               | High     |
| Not employed (mixed)*            | Mabunda et al., 2020 <sup>15</sup>     | n=324  | Military, Rank Not Specified                       | Cross-sectional survey | 09/21 - 10/02 | Mozambique                 | 2.8%               | High     |
| Not employed (mixed)*            | Mahomed et al., 2020 <sup>16</sup>     | n=116  | Military, Rank Not Specified                       | Cross-sectional survey | 11/26 - 12/03 | Mozambique                 | 18.1%              | High     |
| Not employed (mixed)*            | Payne et al., 2020 <sup>17</sup>       | n=382  | Military, Rank Not Specified                       | Cross-sectional survey | 04/20 - 04/24 | United States of America   | 59.7%              | High     |
| Not employed (mixed)*            | World et al., 2020 <sup>18</sup>       | n=6900 | Military, Rank Not Specified                       | Cross-sectional survey | 08/15 - 10/15 | Republic of Korea          | 0.36%              | Unclear  |
| Management Occupations (11-0000) | Shakiba et al., 2020 <sup>10</sup>     | n=16   | Farmers, Ranchers, and Other Agricultural Managers | Cross-sectional survey | 04/11 - 04/19 | Iran (Islamic Republic of) | 19.7% (9.1-31%)    | Moderate |
| Management Occupations (11-      | Favara et al., 2020 <sup>19</sup>      | n=43   | Medical and Health Services Managers               | Cross-sectional survey | 07/13 - 07/13 | The United Kingdom         | 9.3%               | High     |

|                                                         |                                     |        |                                      |                                                                                   |               |                            |                    |          |
|---------------------------------------------------------|-------------------------------------|--------|--------------------------------------|-----------------------------------------------------------------------------------|---------------|----------------------------|--------------------|----------|
| 0000)                                                   |                                     |        |                                      |                                                                                   |               |                            |                    |          |
| Management Occupations (11-0000)                        | Galan et al., 2020 <sup>20</sup>    | n=170  | Medical and Health Services Managers | Cross-sectional survey                                                            | 04/14 - 04/27 | Spain                      | 27.6%              | High     |
| Management Occupations (11-0000)                        | Hunter et al., 2020 <sup>21</sup>   | n=44   | Medical and Health Services Managers | Cross-sectional survey                                                            | 04/29 - 05/08 | United States of America   | 4.55%              | High     |
| Management Occupations (11-0000)                        | Leidner et al., 2020 <sup>22</sup>  | n=257  | Medical and Health Services Managers | Cross sectional study with prospective cohort follow up of a subset of the sample | 04/08 - 05/22 | United States of America   | 3.11%              | High     |
| Management Occupations (11-0000)                        | Martin et al., 2020 <sup>23</sup>   | n=2078 | Medical and Health Services Managers | Cross-sectional survey                                                            | 05/29 - 07/13 | The United Kingdom         | 6.79%              | Moderate |
| Management Occupations (11-0000)                        | Siddiqui et al., 2020 <sup>2</sup>  | n=15   | Medical and Health Services Managers | Prospective cohort                                                                | 04/15 - 08/15 | India                      | 20%                | High     |
| Management Occupations (11-0000)                        | Baracco et al., 2020 <sup>24</sup>  | n=45   | Managers, All Other                  | Cross-sectional survey                                                            | 04/23 - 05/05 | Italy                      | 6.67%              | High     |
| Management Occupations (11-0000)                        | Goenka et al., 2020 <sup>25</sup>   | n=71   | Managers, All Other                  | Cross-sectional survey                                                            | 07/12 - 08/23 | India                      | 7.04%              | Moderate |
| Management Occupations (11-0000)                        | Goenka et al., 2020 <sup>26</sup>   | n=13   | Managers, All Other                  | Cross-sectional survey                                                            | 08/01 - 08/31 | India                      | 38.46%             | High     |
| Business and Financial Operations Occupations (13-0000) | Satpati et al., 2020 <sup>27</sup>  | n=43   | Management Analysts                  | Cross-sectional survey                                                            | 07/26 - 08/08 | India                      | 2.33%              | Moderate |
| Business and Financial                                  | Poustchi et al., 2020 <sup>28</sup> | n=880  | Financial Specialists                | Cross-sectional survey                                                            | 04/17 - 06/02 | Iran (Islamic Republic of) | 14.2% (12.1-16.5%) | Moderate |

|                                                          |                                    |        |                                            |                                                                                   |               |                          |       |          |
|----------------------------------------------------------|------------------------------------|--------|--------------------------------------------|-----------------------------------------------------------------------------------|---------------|--------------------------|-------|----------|
| Operations Occupations (13-0000)                         |                                    |        |                                            |                                                                                   |               |                          |       |          |
| Computer and Mathematical Occupations (15-0000)          | Biggs et al., 2020 <sup>3</sup>    | n=47   | Computer User Support Specialists          | Cross-sectional survey                                                            | 04/28 - 05/03 | United States of America | 0%    | Moderate |
| Architecture and Engineering Occupations (17-0000)       | Siddiqui et al., 2020 <sup>2</sup> | n=21   | Engineers                                  | Prospective cohort                                                                | 04/15 - 08/15 | India                    | 42.9% | High     |
| Life, Physical, and Social Science Occupations (19-0000) | Jones et al., 2020 <sup>29</sup>   | n=245  | Medical Scientists                         | Cross-sectional survey                                                            | 01/15 - 06/15 | The United Kingdom       | 1.9%  | High     |
| Life, Physical, and Social Science Occupations (19-0000) | Anna et al., 2020 <sup>30</sup>    | n=505  | Medical Scientists, Except Epidemiologists | Prospective cohort                                                                | 04/28 - 07/31 | France                   | 8.71% | Moderate |
| Life, Physical, and Social Science Occupations (19-0000) | Erber et al., 2020 <sup>31</sup>   | n=635  | Medical Scientists, Except Epidemiologists | Cross-sectional survey                                                            | 04/14 - 05/29 | Germany                  | 1.24% | High     |
| Life, Physical, and Social Science Occupations (19-0000) | Favara et al., 2020 <sup>19</sup>  | n=38   | Medical Scientists, Except Epidemiologists | Cross-sectional survey                                                            | 07/13 - 07/13 | The United Kingdom       | 2.6%  | High     |
| Life, Physical, and Social Science Occupations (19-0000) | Hanrath et al., 2020 <sup>32</sup> | n=468  | Medical Scientists, Except Epidemiologists | Cross-sectional survey                                                            | 05/29 - 07/06 | The United Kingdom       | 6.2%  | High     |
| Life, Physical, and Social Science Occupations (19-0000) | Leidner et al., 2020 <sup>22</sup> | n=2654 | Medical Scientists, Except Epidemiologists | Cross sectional study with prospective cohort follow up of a subset of the sample | 04/08 - 05/22 | United States of America | 2.22% | High     |



|                                                          |                                        |        |                                            |                                                                                   |               |                          |                 |          |
|----------------------------------------------------------|----------------------------------------|--------|--------------------------------------------|-----------------------------------------------------------------------------------|---------------|--------------------------|-----------------|----------|
| Life, Physical, and Social Science Occupations (19-0000) | Martin et al., 2020 <sup>23</sup>      | n=1154 | Medical Scientists, Except Epidemiologists | Cross-sectional survey                                                            | 05/29 - 07/13 | The United Kingdom       | 9.71%           | Moderate |
| Life, Physical, and Social Science Occupations (19-0000) | Rosser et al., 2020 <sup>33</sup>      | n=102  | Medical Scientists, Except Epidemiologists | Cross-sectional survey                                                            | 04/20 - 05/20 | United States of America | 0.98%           | High     |
| Life, Physical, and Social Science Occupations (19-0000) | Silva et al., 2020 <sup>34</sup>       | n=69   | Chemists                                   | Cross-sectional survey                                                            | 06/05 - 07/31 | Brazil                   | 4%              | High     |
| Life, Physical, and Social Science Occupations (19-0000) | Tsitsilonis et al., 2020 <sup>12</sup> | n=250  | Physical Scientists, All Other             | Cross-sectional survey                                                            | 06/15 - 07/15 | Greece                   | 1.42% (0-7.24%) | Moderate |
| Community and Social Service Occupations (21-0000)       | Jones et al., 2020 <sup>29</sup>       | n=211  | Healthcare Social Workers                  | Cross-sectional survey                                                            | 01/15 - 06/15 | The United Kingdom       | 6.3%            | High     |
| Community and Social Service Occupations (21-0000)       | Leidner et al., 2020 <sup>22</sup>     | n=235  | Social Workers, All Other                  | Cross sectional study with prospective cohort follow up of a subset of the sample | 04/08 - 05/22 | United States of America | 3.4%            | High     |
| Community and Social Service Occupations (21-0000)       | Rosser et al., 2020 <sup>33</sup>      | n=117  | Social Workers, All Other                  | Cross-sectional survey                                                            | 04/20 - 05/20 | United States of America | 1.71%           | High     |
| Community and Social Service Occupations (21-0000)       | Sabourin et al., 2020 <sup>35</sup>    | n=91   | Social Workers, All Other                  | Cross-sectional survey                                                            | 07/15 - 08/15 | United States of America | 5.49%           | High     |
| Community and Social Service                             | Yogo et al., 2020 <sup>36</sup>        | n=35   | Social Workers, All Other                  | Cross-sectional survey                                                            | 05/20 - 06/08 | United States of America | 0%              | High     |

|                                                        |                                        |        |                                       |                        |               |                          |                    |          |
|--------------------------------------------------------|----------------------------------------|--------|---------------------------------------|------------------------|---------------|--------------------------|--------------------|----------|
| Occupations (21-0000)                                  |                                        |        |                                       |                        |               |                          |                    |          |
| Community and Social Service Occupations (21-0000)     | Biggs et al., 2020 <sup>3</sup>        | n=6    | Religious Workers                     | Cross-sectional survey | 04/28 - 05/03 | United States of America | 16.67%             | Moderate |
| Education, Training, and Library Occupations (25-0000) | Campos et al., 2020 <sup>37</sup>      | n=2715 | Postsecondary Teachers                | Cross-sectional survey | 05/13 - 07/10 | Portugal                 | 2.6%               | High     |
| Education, Training, and Library Occupations (25-0000) | Goncalves et al., 2020 <sup>38</sup>   | n=1636 | Postsecondary Teachers                | Cross-sectional survey | 06/15 - 06/30 | Portugal                 | 3.05%              | Moderate |
| Education, Training, and Library Occupations (25-0000) | Tsitsilonis et al., 2020 <sup>12</sup> | n=312  | Postsecondary Teachers                | Cross-sectional survey | 06/15 - 07/15 | Greece                   | 1.2% (0.14-3.7%)   | Moderate |
| Education, Training, and Library Occupations (25-0000) | Fontanet et al., 2020 <sup>39</sup>    | n=42   | Elementary and Middle School Teachers | Retrospective cohort   | 04/28 - 04/30 | France                   | 7.1%               | Moderate |
| Education, Training, and Library Occupations (25-0000) | Siddiqui et al., 2020 <sup>2</sup>     | n=8    | Elementary and Middle School Teachers | Prospective cohort     | 04/15 - 08/15 | India                    | 25%                | High     |
| Education, Training, and Library Occupations (25-0000) | Torres et al., 2020 <sup>40</sup>      | n=165  | Elementary and Middle School Teachers | Cross-sectional survey | 05/04 - 05/19 | Chile                    | 20.6% (14.7-27.6%) | High     |



|                                  |                                                                      |                                     |        |                                                               |                        |               |                          |                    |          |
|----------------------------------|----------------------------------------------------------------------|-------------------------------------|--------|---------------------------------------------------------------|------------------------|---------------|--------------------------|--------------------|----------|
| 1<br>2<br>3<br>4<br>5<br>6<br>7  | Arts, Design, Entertainment, Sports, and Media Occupations (27-0000) | Halatoko et al., 2020 <sup>41</sup> | n=55   | Fine Artists, Including Painters, Sculptors, and Illustrators | Cross-sectional survey | 04/23 - 05/08 | Togo                     | 0%                 | High     |
| 8<br>9<br>10<br>11<br>12<br>13   | Arts, Design, Entertainment, Sports, and Media Occupations (27-0000) | Slusser et al., 2020 <sup>42</sup>  | n=5603 | Athletes, Coaches, Umpires, and Related Workers               | Cross-sectional survey | 04/08 - 04/21 | United States of America | 0.7% (0.28-1.15%)  | Unclear  |
| 14<br>15<br>16<br>17<br>18       | Arts, Design, Entertainment, Sports, and Media Occupations (27-0000) | Vince et al., 2020 <sup>43</sup>    | n=272  | Athletes, Coaches, Umpires, and Related Workers               | Prospective cohort     | 05/29 - 07/31 | Croatia                  | 14%                | Moderate |
| 19<br>20<br>21<br>22<br>23       | Arts, Design, Entertainment, Sports, and Media Occupations (27-0000) | Vince et al., 2020 <sup>43</sup>    | n=43   | Coaches and Scouts                                            | Prospective cohort     | 05/29 - 07/31 | Croatia                  | 16.3%              | Moderate |
| 24<br>25<br>26<br>27<br>28       | Arts, Design, Entertainment, Sports, and Media Occupations (27-0000) | Mack et al., 2020 <sup>44</sup>     | n=1007 | Umpires, Referees, and Other Sports Officials                 | Prospective cohort     | 06/16 - 06/30 | Germany                  | 2.09% (1.37-3.17%) | High     |
| 29<br>30<br>31<br>32<br>33       | Arts, Design, Entertainment, Sports, and Media Occupations (27-0000) | Khan et al., 2020 <sup>45</sup>     | n=44   | Media and Communication Workers                               | Cross-sectional survey | 07/01 - 07/15 | India                    | 0%                 | Moderate |
| 34<br>35<br>36<br>37<br>38<br>39 | Healthcare Practitioners and Technical Occupations (29-0000)         | Akinbami et al., 2020 <sup>46</sup> | n=566  | Healthcare Practitioners and Technical Occupations            | Cross-sectional survey | 05/18 - 06/13 | United States of America | 4.6% (3-6.7%)      | Moderate |

|                                                              |                                     |       |                                                                                        |                                                                                   |               |                          |               |          |
|--------------------------------------------------------------|-------------------------------------|-------|----------------------------------------------------------------------------------------|-----------------------------------------------------------------------------------|---------------|--------------------------|---------------|----------|
| Healthcare Practitioners and Technical Occupations (29-0000) | Khan et al., 2020 <sup>45</sup>     | n=355 | Healthcare Practitioners and Technical Occupations                                     | Cross-sectional survey                                                            | 07/01 - 07/15 | India                    | 4.8% (3-7.6%) | Moderate |
| Healthcare Practitioners and Technical Occupations (29-0000) | Leidner et al., 2020 <sup>22</sup>  | n=402 | Healthcare Practitioners and Technical Occupations                                     | Cross sectional study with prospective cohort follow up of a subset of the sample | 04/08 - 05/22 | United States of America | 1.49%         | High     |
| Healthcare Occupations (mixed)*                              | Hanrath et al., 2020 <sup>32</sup>  | n=102 | Healthcare Practitioners and Technical Occupations and Healthcare Support Occupations* | Cross-sectional survey                                                            | 05/29 - 07/06 | The United Kingdom       | 6.62%         | High     |
| Healthcare Occupations (mixed)*                              | Jones et al., 2020 <sup>29</sup>    | n=413 | Healthcare Practitioners and Technical Occupations and Healthcare Support Occupations* | Cross-sectional survey                                                            | 01/15 - 06/15 | The United Kingdom       | 7.8%          | High     |
| Healthcare Occupations (mixed)*                              | Martin et al., 2020 <sup>23</sup>   | n=550 | Healthcare Practitioners and Technical Occupations and Healthcare Support Occupations* | Cross-sectional survey                                                            | 05/29 - 07/13 | The United Kingdom       | 10.36%        | Moderate |
| Healthcare Occupations (mixed)*                              | Amendola et al., 2020 <sup>47</sup> | n=117 | Healthcare Practitioners and Technical Occupations and Healthcare Support Occupations* | Cross-sectional survey                                                            | 04/15 - 04/15 | Italy                    | 4.27%         | High     |
| Healthcare Occupations (mixed)*                              | Arnaldo et al., 2020 <sup>48</sup>  | n=543 | Healthcare Practitioners and Technical Occupations and Healthcare Support Occupations* | Cross-sectional survey                                                            | 08/10 - 08/21 | Mozambique               | 3.7%          | High     |

|                                 |                                     |       |                                                                                        |                        |               |                          |        |          |
|---------------------------------|-------------------------------------|-------|----------------------------------------------------------------------------------------|------------------------|---------------|--------------------------|--------|----------|
| Healthcare Occupations (mixed)* | Bal et al., 2020 <sup>49</sup>      | n=190 | Healthcare Practitioners and Technical Occupations and Healthcare Support Occupations* | Cross-sectional survey | 04/10 - 05/28 | France                   | 3.68%  | High     |
| Healthcare Occupations (mixed)* | Barallat et al., 2020 <sup>50</sup> | n=429 | Healthcare Practitioners and Technical Occupations and Healthcare Support Occupations* | Cross-sectional survey | 05/04 - 05/22 | Spain                    | 7.69%  | High     |
| Healthcare Occupations (mixed)* | Bardai et al., 2020 <sup>51</sup>   | n=35  | Healthcare Practitioners and Technical Occupations and Healthcare Support Occupations* | Cross-sectional survey | 06/10 - 07/27 | Canada                   | 11%    | High     |
| Healthcare Occupations (mixed)* | Bardai et al., 2020 <sup>51</sup>   | n=20  | Healthcare Practitioners and Technical Occupations and Healthcare Support Occupations* | Cross-sectional survey | 06/10 - 07/27 | Canada                   | 15%    | High     |
| Healthcare Occupations (mixed)* | Bardai et al., 2020 <sup>51</sup>   | n=44  | Healthcare Practitioners and Technical Occupations and Healthcare Support Occupations* | Cross-sectional survey | 06/10 - 07/27 | Canada                   | 11%    | High     |
| Healthcare Occupations (mixed)* | Bardai et al., 2020 <sup>51</sup>   | n=99  | Healthcare Practitioners and Technical Occupations and Healthcare Support Occupations* | Cross-sectional survey | 06/10 - 07/27 | Canada                   | 12%    | High     |
| Healthcare Occupations (mixed)* | Biggs et al., 2020 <sup>3</sup>     | n=59  | Healthcare Practitioners and Technical Occupations and Healthcare Support Occupations* | Cross-sectional survey | 04/28 - 05/03 | United States of America | 10.17% | Moderate |

|                                 |                                    |         |                                                                                        |                        |               |                          |                   |          |
|---------------------------------|------------------------------------|---------|----------------------------------------------------------------------------------------|------------------------|---------------|--------------------------|-------------------|----------|
| Healthcare Occupations (mixed)* | Blairon et al., 2020 <sup>52</sup> | n=588   | Healthcare Practitioners and Technical Occupations and Healthcare Support Occupations* | Cross-sectional survey | 05/25 - 06/19 | Belgium                  | 19.2%             | High     |
| Healthcare Occupations (mixed)* | Borraz et al., 2020 <sup>53</sup>  | n=289   | Healthcare Practitioners and Technical Occupations and Healthcare Support Occupations* | Prospective cohort     | 03/20 - 04/21 | Spain                    | 5.88%             | High     |
| Healthcare Occupations (mixed)* | Brunner et al., 2020 <sup>54</sup> | n=762   | Healthcare Practitioners and Technical Occupations and Healthcare Support Occupations* | Cross-sectional survey | 05/04 - 05/29 | United States of America | 4.5%              | High     |
| Healthcare Occupations (mixed)* | Brunner et al., 2020 <sup>54</sup> | n=764   | Healthcare Practitioners and Technical Occupations and Healthcare Support Occupations* | Cross-sectional survey | 05/04 - 05/29 | United States of America | 2%                | High     |
| Healthcare Occupations (mixed)* | Carozzi et al., 2020 <sup>55</sup> | n=17098 | Healthcare Practitioners and Technical Occupations and Healthcare Support Occupations* | Cross-sectional survey | 04/01 - 04/30 | Italy                    | 3.1%              | High     |
| Healthcare Occupations (mixed)* | Carrat et al., 2020 <sup>4</sup>   | n=568   | Healthcare Practitioners and Technical Occupations and Healthcare Support Occupations* | Prospective cohort     | 05/04 - 06/23 | France                   | 11.6% (8.3-14.4%) | Moderate |
| Healthcare Occupations (mixed)* | Cavlek et al., 2020 <sup>56</sup>  | n=558   | Healthcare Practitioners and Technical Occupations and Healthcare Support Occupations* | Cross-sectional survey | 04/25 - 05/24 | Croatia                  | 1.25%             | High     |

|                                 |                                     |        |                                                                                        |                        |               |                          |                   |          |
|---------------------------------|-------------------------------------|--------|----------------------------------------------------------------------------------------|------------------------|---------------|--------------------------|-------------------|----------|
| Healthcare Occupations (mixed)* | Chibwana et al., 2020 <sup>57</sup> | n=500  | Healthcare Practitioners and Technical Occupations and Healthcare Support Occupations* | Prospective cohort     | 05/22 - 06/19 | Malawi                   | 12.3% (8.2-16.5%) | High     |
| Healthcare Occupations (mixed)* | Coffman et al., 2020 <sup>58</sup>  | n=1100 | Healthcare Practitioners and Technical Occupations and Healthcare Support Occupations* | Cross-sectional survey | 07/01 - 07/31 | United States of America | 2.2%              | Unclear  |
| Healthcare Occupations (mixed)* | Cooper et al., 2020 <sup>59</sup>   | n=118  | Healthcare Practitioners and Technical Occupations and Healthcare Support Occupations* | Cross-sectional survey | 06/10 - 08/07 | The United Kingdom       | 8.47%             | Moderate |
| Healthcare Occupations (mixed)* | Cooper et al., 2020 <sup>59</sup>   | n=27   | Healthcare Practitioners and Technical Occupations and Healthcare Support Occupations* | Cross-sectional survey | 06/10 - 08/07 | The United Kingdom       | 14.81%            | Moderate |
| Healthcare Occupations (mixed)* | Cooper et al., 2020 <sup>59</sup>   | n=24   | Healthcare Practitioners and Technical Occupations and Healthcare Support Occupations* | Cross-sectional survey | 06/10 - 08/07 | The United Kingdom       | 12.5%             | Moderate |
| Healthcare Occupations (mixed)* | Cooper et al., 2020 <sup>59</sup>   | n=1068 | Healthcare Practitioners and Technical Occupations and Healthcare Support Occupations* | Cross-sectional survey | 06/10 - 08/07 | The United Kingdom       | 5.43%             | Moderate |
| Healthcare Occupations (mixed)* | Cooper et al., 2020 <sup>59</sup>   | n=174  | Healthcare Practitioners and Technical Occupations and Healthcare Support Occupations* | Cross-sectional survey | 06/10 - 08/07 | The United Kingdom       | 5.75%             | Moderate |

|                                 |                                     |        |                                                                                        |                        |               |                    |                  |          |
|---------------------------------|-------------------------------------|--------|----------------------------------------------------------------------------------------|------------------------|---------------|--------------------|------------------|----------|
| Healthcare Occupations (mixed)* | Cooper et al., 2020 <sup>59</sup>   | n=319  | Healthcare Practitioners and Technical Occupations and Healthcare Support Occupations* | Cross-sectional survey | 06/10 - 08/07 | The United Kingdom | 11.29%           | Moderate |
| Healthcare Occupations (mixed)* | Cooper et al., 2020 <sup>59</sup>   | n=5698 | Healthcare Practitioners and Technical Occupations and Healthcare Support Occupations* | Cross-sectional survey | 06/10 - 08/07 | The United Kingdom | 7.2%             | Moderate |
| Healthcare Occupations (mixed)* | Cooper et al., 2020 <sup>59</sup>   | n=412  | Healthcare Practitioners and Technical Occupations and Healthcare Support Occupations* | Cross-sectional survey | 06/10 - 08/07 | The United Kingdom | 4.61%            | Moderate |
| Healthcare Occupations (mixed)* | Denyer et al., 2020 <sup>60</sup>   | n=5850 | Healthcare Practitioners and Technical Occupations and Healthcare Support Occupations* | Cross-sectional survey | 05/12 - 05/18 | Japan              | 1.79%            | Unclear  |
| Healthcare Occupations (mixed)* | Dimeglio et al., 2020 <sup>61</sup> | n=8758 | Healthcare Practitioners and Technical Occupations and Healthcare Support Occupations* | Cross-sectional survey | 06/10 - 07/10 | France             | 3.2% (2.8-3.5%)  | High     |
| Healthcare Occupations (mixed)* | Erber et al., 2020 <sup>31</sup>    | n=603  | Healthcare Practitioners and Technical Occupations and Healthcare Support Occupations* | Cross-sectional survey | 04/14 - 05/29 | Germany            | 2.8%             | High     |
| Healthcare Occupations (mixed)* | Fuereder et al., 2020 <sup>62</sup> | n=62   | Healthcare Practitioners and Technical Occupations and Healthcare Support Occupations* | Retrospective cohort   | 04/01 - 06/04 | Austria            | 3.2% (0.4-11.2%) | High     |

|                                 |                                     |        |                                                                                        |                                |               |                          |                    |          |
|---------------------------------|-------------------------------------|--------|----------------------------------------------------------------------------------------|--------------------------------|---------------|--------------------------|--------------------|----------|
| Healthcare Occupations (mixed)* | Fusco et al., 2020 <sup>63</sup>    | n=115  | Healthcare Practitioners and Technical Occupations and Healthcare Support Occupations* | Cross-sectional survey         | 03/23 - 04/02 | Italy                    | 1.74%              | High     |
| Healthcare Occupations (mixed)* | Geraci et al., 2020 <sup>64</sup>   | n=230  | Healthcare Practitioners and Technical Occupations and Healthcare Support Occupations* | Cross-sectional survey         | 03/16 - 05/20 | United States of America | 2.17%              | High     |
| Healthcare Occupations (mixed)* | Gudo et al., 2020 <sup>65</sup>     | n=1427 | Healthcare Practitioners and Technical Occupations and Healthcare Support Occupations* | Cross-sectional survey         | 06/17 - 06/30 | Mozambique               | 7% (6-9%)          | High     |
| Healthcare Occupations (mixed)* | Hackner et al., 2020 <sup>66</sup>  | n=130  | Healthcare Practitioners and Technical Occupations and Healthcare Support Occupations* | Cross-sectional survey         | 04/01 - 04/30 | Austria                  | 2.3%               | High     |
| Healthcare Occupations (mixed)* | Halatoko et al., 2020 <sup>41</sup> | n=370  | Healthcare Practitioners and Technical Occupations and Healthcare Support Occupations* | Cross-sectional survey         | 04/23 - 05/08 | Togo                     | 1.4%               | High     |
| Healthcare Occupations (mixed)* | Haq et al., 2020 <sup>67</sup>      | n=76   | Healthcare Practitioners and Technical Occupations and Healthcare Support Occupations* | Cross-sectional survey         | 06/15 - 06/29 | Pakistan                 | 35.5% (24.8-47.3%) | Moderate |
| Healthcare Occupations (mixed)* | He et al., 2020 <sup>68</sup>       | n=1059 | Healthcare Practitioners and Technical Occupations and Healthcare Support Occupations* | Repeated cross sectional study | 05/13 - 06/10 | China                    | 9.3%               | High     |

|                                 |                                      |         |                                                                                        |                                |               |                          |                    |          |
|---------------------------------|--------------------------------------|---------|----------------------------------------------------------------------------------------|--------------------------------|---------------|--------------------------|--------------------|----------|
| Healthcare Occupations (mixed)* | Herzberg et al., 2020 <sup>69</sup>  | n=871   | Healthcare Practitioners and Technical Occupations and Healthcare Support Occupations* | Prospective cohort             | 04/14 - 06/16 | Germany                  | 2.64%              | High     |
| Healthcare Occupations (mixed)* | Jeremias et al., 2020 <sup>70</sup>  | n=100   | Healthcare Practitioners and Technical Occupations and Healthcare Support Occupations* | Cross-sectional survey         | 03/01 - 04/30 | United States of America | 12%                | High     |
| Healthcare Occupations (mixed)* | Jespersen et al., 2020 <sup>71</sup> | n=17948 | Healthcare Practitioners and Technical Occupations and Healthcare Support Occupations* | Cross-sectional survey         | 05/18 - 06/19 | Denmark                  | 3.36% (2.38-3.82%) | Moderate |
| Healthcare Occupations (mixed)* | Kassem et al., 2020 <sup>72</sup>    | n=74    | Healthcare Practitioners and Technical Occupations and Healthcare Support Occupations* | Cross-sectional survey         | 06/01 - 06/14 | Egypt                    | 12.2%              | High     |
| Healthcare Occupations (mixed)* | Kern et al., 2020 <sup>73</sup>      | n=1316  | Healthcare Practitioners and Technical Occupations and Healthcare Support Occupations* | Cross-sectional survey         | 04/09 - 04/16 | Germany                  | 1.06% (0.58-1.78%) | High     |
| Healthcare Occupations (mixed)* | Khalil et al., 2020 <sup>74</sup>    | n=190   | Healthcare Practitioners and Technical Occupations and Healthcare Support Occupations* | Cross-sectional survey         | 05/15 - 05/28 | The United Kingdom       | 22%                | High     |
| Healthcare Occupations (mixed)* | Kumar et al., 2020 <sup>75</sup>     | n=635   | Healthcare Practitioners and Technical Occupations and Healthcare Support Occupations* | Repeated cross sectional study | 07/11 - 07/24 | India                    | 0%                 | High     |



|                                 |                                       |        |                                                                                        |                        |               |            |                 |          |
|---------------------------------|---------------------------------------|--------|----------------------------------------------------------------------------------------|------------------------|---------------|------------|-----------------|----------|
| Healthcare Occupations (mixed)* | Lackermair et al., 2020 <sup>76</sup> | n=151  | Healthcare Practitioners and Technical Occupations and Healthcare Support Occupations* | Cross-sectional survey | 04/02 - 04/06 | Germany    | 2.6% (0.8-7.1%) | High     |
| Healthcare Occupations (mixed)* | Lahner et al., 2020 <sup>77</sup>     | n=1084 | Healthcare Practitioners and Technical Occupations and Healthcare Support Occupations* | Cross-sectional survey | 04/07 - 04/27 | Italy      | 0.7%            | High     |
| Healthcare Occupations (mixed)* | Liu et al., 2020 <sup>78</sup>        | n=116  | Healthcare Practitioners and Technical Occupations and Healthcare Support Occupations* | Cross-sectional survey | 02/07 - 04/21 | China      | 0%              | High     |
| Healthcare Occupations (mixed)* | Liu et al., 2020 <sup>78</sup>        | n=304  | Healthcare Practitioners and Technical Occupations and Healthcare Support Occupations* | Cross-sectional survey | 02/07 - 04/21 | China      | 0%              | High     |
| Healthcare Occupations (mixed)* | Liu et al., 2020 <sup>79</sup>        | n=3832 | Healthcare Practitioners and Technical Occupations and Healthcare Support Occupations* | Cross-sectional survey | 02/29 - 04/29 | China      | 4% (3.4-4.7%)   | Moderate |
| Healthcare Occupations (mixed)* | Lorenzo et al., 2020 <sup>80</sup>    | n=38   | Healthcare Practitioners and Technical Occupations and Healthcare Support Occupations* | Cross-sectional survey | 05/02 - 05/31 | Italy      | 5.3%            | High     |
| Healthcare Occupations (mixed)* | Mahomed et al., 2020 <sup>81</sup>    | n=569  | Healthcare Practitioners and Technical Occupations and Healthcare Support Occupations* | Cross-sectional survey | 08/31 - 10/12 | Mozambique | 0.7%            | High     |

|                                 |                                          |        |                                                                                        |                        |               |                    |                |          |
|---------------------------------|------------------------------------------|--------|----------------------------------------------------------------------------------------|------------------------|---------------|--------------------|----------------|----------|
| Healthcare Occupations (mixed)* | Mahumane et al., 2020 <sup>82</sup>      | n=380  | Healthcare Practitioners and Technical Occupations and Healthcare Support Occupations* | Cross-sectional survey | 11/02 - 11/17 | Mozambique         | 1.3%           | High     |
| Healthcare Occupations (mixed)* | Majdoubi et al., 2020 <sup>83</sup>      | n=276  | Healthcare Practitioners and Technical Occupations and Healthcare Support Occupations* | Cross-sectional survey | 05/17 - 06/19 | Canada             | 0.6% (0-2.71%) | High     |
| Healthcare Occupations (mixed)* | Majiya et al., 2020 <sup>84</sup>        | n=185  | Healthcare Practitioners and Technical Occupations and Healthcare Support Occupations* | Cross-sectional survey | 06/26 - 06/30 | Nigeria            | 25.41%         | Moderate |
| Healthcare Occupations (mixed)* | Majiya et al., 2020 <sup>84</sup>        | n=43   | Healthcare Practitioners and Technical Occupations and Healthcare Support Occupations* | Cross-sectional survey | 06/26 - 06/30 | Nigeria            | 37.21%         | Moderate |
| Healthcare Occupations (mixed)* | Malfertheiner et al., 2020 <sup>85</sup> | n=139  | Healthcare Practitioners and Technical Occupations and Healthcare Support Occupations* | Prospective cohort     | 03/15 - 06/07 | Germany            | 0%             | High     |
| Healthcare Occupations (mixed)* | Martin et al., 2020 <sup>86</sup>        | n=326  | Healthcare Practitioners and Technical Occupations and Healthcare Support Occupations* | Cross-sectional survey | 04/15 - 05/18 | Belgium            | 11%            | High     |
| Healthcare Occupations (mixed)* | Martin et al., 2020 <sup>23</sup>        | n=4631 | Healthcare Practitioners and Technical Occupations and Healthcare Support Occupations* | Cross-sectional survey | 05/29 - 07/13 | The United Kingdom | 13.65%         | Moderate |

|                                 |                                      |        |                                                                                        |                        |               |                          |                   |          |
|---------------------------------|--------------------------------------|--------|----------------------------------------------------------------------------------------|------------------------|---------------|--------------------------|-------------------|----------|
| Healthcare Occupations (mixed)* | Melo et al., 2020 <sup>87</sup>      | n=471  | Healthcare Practitioners and Technical Occupations and Healthcare Support Occupations* | Cross-sectional survey | 06/01 - 06/30 | Brazil                   | 13.59%            | High     |
| Healthcare Occupations (mixed)* | Morcuende et al., 2020 <sup>88</sup> | n=6    | Healthcare Practitioners and Technical Occupations and Healthcare Support Occupations* | Cross-sectional survey | 03/01 - 04/21 | United States of America | 0%                | High     |
| Healthcare Occupations (mixed)* | Moscola et al., 2020 <sup>89</sup>   | n=8156 | Healthcare Practitioners and Technical Occupations and Healthcare Support Occupations* | Cross-sectional survey | 04/20 - 06/23 | United States of America | 11.6%             | High     |
| Healthcare Occupations (mixed)* | Nishida et al., 2020 <sup>90</sup>   | n=49   | Healthcare Practitioners and Technical Occupations and Healthcare Support Occupations* | Cross-sectional survey | 06/12 - 06/19 | Japan                    | 0%                | Moderate |
| Healthcare Occupations (mixed)* | Olalla et al., 2020 <sup>91</sup>    | n=498  | Healthcare Practitioners and Technical Occupations and Healthcare Support Occupations* | Cross-sectional survey | 04/15 - 04/25 | Spain                    | 2.2%              | High     |
| Healthcare Occupations (mixed)* | Pallett et al., 2020 <sup>92</sup>   | n=504  | Healthcare Practitioners and Technical Occupations and Healthcare Support Occupations* | Prospective cohort     | 04/08 - 06/12 | The United Kingdom       | 10.6% (7.6-13.6%) | High     |
| Healthcare Occupations (mixed)* | Pere et al., 2020 <sup>93</sup>      | n=3569 | Healthcare Practitioners and Technical Occupations and Healthcare Support Occupations* | Cross-sectional survey | 05/02 - 06/26 | France                   | 11.9%             | High     |

|                                 |                                       |        |                                                                                        |                        |               |                            |                    |          |
|---------------------------------|---------------------------------------|--------|----------------------------------------------------------------------------------------|------------------------|---------------|----------------------------|--------------------|----------|
| Healthcare Occupations (mixed)* | Poulikakos et al., 2020 <sup>94</sup> | n=281  | Healthcare Practitioners and Technical Occupations and Healthcare Support Occupations* | Cross-sectional survey | 05/04 - 05/06 | The United Kingdom         | 6%                 | High     |
| Healthcare Occupations (mixed)* | Psichogiou et al., 2020 <sup>95</sup> | n=1495 | Healthcare Practitioners and Technical Occupations and Healthcare Support Occupations* | Cross-sectional survey | 04/13 - 05/15 | Greece                     | 1.26% (0.43-3.26%) | Moderate |
| Healthcare Occupations (mixed)* | Satpati et al., 2020 <sup>27</sup>    | n=18   | Healthcare Practitioners and Technical Occupations and Healthcare Support Occupations* | Cross-sectional survey | 07/26 - 08/08 | India                      | 5.56%              | Moderate |
| Healthcare Occupations (mixed)* | Seetharam et al., 2020 <sup>96</sup>  | n=728  | Healthcare Practitioners and Technical Occupations and Healthcare Support Occupations* | Cross-sectional survey | 08/16 - 08/29 | India                      | 27.3% (24.1-30.6%) | Unclear  |
| Healthcare Occupations (mixed)* | Shakiba et al., 2020 <sup>10</sup>    | n=43   | Healthcare Practitioners and Technical Occupations and Healthcare Support Occupations* | Cross-sectional survey | 04/11 - 04/19 | Iran (Islamic Republic of) | 14.5% (4.5-25%)    | Moderate |
| Healthcare Occupations (mixed)* | Shields et al., 2020 <sup>97</sup>    | n=516  | Healthcare Practitioners and Technical Occupations and Healthcare Support Occupations* | Cross-sectional survey | 04/24 - 04/25 | The United Kingdom         | 24.4%              | High     |
| Healthcare Occupations (mixed)* | Silva et al., 2020 <sup>98</sup>      | n=61   | Healthcare Practitioners and Technical Occupations and Healthcare Support Occupations* | Cross-sectional survey | 04/09 - 04/29 | Brazil                     | 4.91%              | High     |

|                                 |                                        |         |                                                                                        |                        |               |                          |                 |         |
|---------------------------------|----------------------------------------|---------|----------------------------------------------------------------------------------------|------------------------|---------------|--------------------------|-----------------|---------|
| Healthcare Occupations (mixed)* | Solodky et al., 2020 <sup>99</sup>     | n=85    | Healthcare Practitioners and Technical Occupations and Healthcare Support Occupations* | Cross-sectional survey | 03/01 - 04/16 | France                   | 5.88%           | High    |
| Healthcare Occupations (mixed)* | Soriano et al., 2020 <sup>100</sup>    | n=108   | Healthcare Practitioners and Technical Occupations and Healthcare Support Occupations* | Retrospective cohort   | 04/26 - 05/16 | Spain                    | 13%             | High    |
| Healthcare Occupations (mixed)* | Statistica et al., 2020 <sup>101</sup> | n=64660 | Healthcare Practitioners and Technical Occupations and Healthcare Support Occupations* | Cross-sectional survey | 05/25 - 07/15 | Italy                    | 2.5%            | Unclear |
| Healthcare Occupations (mixed)* | Steensels et al., 2020 <sup>102</sup>  | n=3056  | Healthcare Practitioners and Technical Occupations and Healthcare Support Occupations* | Cross-sectional survey | 04/22 - 04/30 | Belgium                  | 6.4% (5.5-7.3%) | High    |
| Healthcare Occupations (mixed)* | Stock et al., 2020 <sup>103</sup>      | n=98    | Healthcare Practitioners and Technical Occupations and Healthcare Support Occupations* | Cross-sectional survey | 04/04 - 04/20 | United States of America | 15.3%           | High    |
| Healthcare Occupations (mixed)* | Takita et al., 2020 <sup>104</sup>     | n=175   | Healthcare Practitioners and Technical Occupations and Healthcare Support Occupations* | Cross-sectional survey | 04/20 - 05/20 | Japan                    | 4% (1.62-8.07%) | High    |
| Healthcare Occupations (mixed)* | Tong et al., 2020 <sup>105</sup>       | n=191   | Healthcare Practitioners and Technical Occupations and Healthcare Support Occupations* | Cross-sectional survey | 05/12 - 05/15 | China                    | 0%              | High    |

|                                 |                                                |        |                                                                                        |                                                                                   |               |            |        |      |
|---------------------------------|------------------------------------------------|--------|----------------------------------------------------------------------------------------|-----------------------------------------------------------------------------------|---------------|------------|--------|------|
| Healthcare Occupations (mixed)* | Trieu et al., 2020 <sup>106</sup>              | n=607  | Healthcare Practitioners and Technical Occupations and Healthcare Support Occupations* | Prospective cohort                                                                | 03/06 - 04/09 | Norway     | 5.27%  | High |
| Healthcare Occupations (mixed)* | Tu et al., 2020 <sup>107</sup>                 | n=325  | Healthcare Practitioners and Technical Occupations and Healthcare Support Occupations* | Cross sectional study with prospective cohort follow up of a subset of the sample | 03/19 - 03/20 | China      | 43.08% | High |
| Healthcare Occupations (mixed)* | Valdivia et al., 2020 <sup>108</sup>           | n=1153 | Healthcare Practitioners and Technical Occupations and Healthcare Support Occupations* | Cross-sectional survey                                                            | 04/13 - 04/30 | Spain      | 3.5%   | High |
| Healthcare Occupations (mixed)* | Vasquez et al., 2020 <sup>109</sup>            | n=1147 | Healthcare Practitioners and Technical Occupations and Healthcare Support Occupations* | Cross-sectional survey                                                            | 05/19 - 06/06 | Peru       | 58.3%  | High |
| Healthcare Occupations (mixed)* | Viegas et al., 2020 <sup>110</sup>             | n=1443 | Healthcare Practitioners and Technical Occupations and Healthcare Support Occupations* | Cross-sectional survey                                                            | 08/03 - 08/21 | Mozambique | 2.63%  | High |
| Healthcare Occupations (mixed)* | Vlachoyiannopoulou et al., 2020 <sup>111</sup> | n=321  | Healthcare Practitioners and Technical Occupations and Healthcare Support Occupations* | Cross-sectional survey                                                            | 04/25 - 05/10 | Greece     | 2.18%  | High |
| Healthcare Occupations (mixed)* | Volta et al., 2020 <sup>112</sup>              | n=76   | Healthcare Practitioners and Technical Occupations and Healthcare Support Occupations* | Cross-sectional survey                                                            | 04/27 - 04/27 | Italy      | 11.8%  | High |

|                                 |                                      |        |                                                                                                                |                        |               |                          |        |          |
|---------------------------------|--------------------------------------|--------|----------------------------------------------------------------------------------------------------------------|------------------------|---------------|--------------------------|--------|----------|
| Healthcare Occupations (mixed)* | Ward et al., 2020 <sup>113</sup>     | n=5416 | Healthcare Practitioners and Technical Occupations and Healthcare Support Occupations*                         | Cross-sectional survey | 09/15 - 09/28 | The United Kingdom       | 10.67% | Moderate |
| Healthcare Occupations (mixed)* | Ward et al., 2020 <sup>113</sup>     | n=1692 | Healthcare Practitioners and Technical Occupations and Healthcare Support Occupations*                         | Cross-sectional survey | 09/15 - 09/28 | The United Kingdom       | 6.68%  | Moderate |
| Healthcare Occupations (mixed)* | Xiong et al., 2020 <sup>114</sup>    | n=797  | Healthcare Practitioners and Technical Occupations and Healthcare Support Occupations*                         | Cross-sectional survey | 02/12 - 03/17 | China                    | 4.39%  | Unclear  |
| Healthcare Occupations (mixed)* | Zhang et al., 2020 <sup>115</sup>    | n=63   | Healthcare Practitioners and Technical Occupations and Healthcare Support Occupations*                         | Cross-sectional survey | 01/21 - 02/16 | China                    | 0%     | High     |
| Healthcare Occupations (mixed)* | Zhao et al., 2020 <sup>116</sup>     | n=1060 | Healthcare Practitioners and Technical Occupations and Healthcare Support Occupations*                         | Cross-sectional survey | 01/14 - 02/21 | China                    | 8.3%   | High     |
| First responders (mixed)*       | Ahmad et al., 2020 <sup>117</sup>    | n=40   | Healthcare Practitioners and Technical Occupations and Protective Service Occupations (i.e. first responders)* | Cross-sectional survey | 04/21 - 05/22 | United States of America | 20%    | High     |
| First responders (mixed)*       | Halbrook et al., 2020 <sup>118</sup> | n=679  | Healthcare Practitioners and Technical Occupations and Protective Service Occupations (i.e. first responders)* | Cross-sectional survey | 05/19 - 08/31 | United States of America | 8.1%   | Moderate |

|                                                          |                                                              |                                         |       |                                                                                                                |                        |               |                          |                    |          |
|----------------------------------------------------------|--------------------------------------------------------------|-----------------------------------------|-------|----------------------------------------------------------------------------------------------------------------|------------------------|---------------|--------------------------|--------------------|----------|
| 1<br>2<br>3<br>4<br>5<br>6<br>7<br>8<br>9                | First responders (mixed)*                                    | Iwuji et al., 2020 <sup>119</sup>       | n=683 | Healthcare Practitioners and Technical Occupations and Protective Service Occupations (i.e. first responders)* | Cross-sectional survey | 05/12 - 05/13 | United States of America | 0.7%               | High     |
| 10<br>11<br>12<br>13<br>14<br>15                         | First responders (mixed)*                                    | Magyar et al., 2020 <sup>120</sup>      | n=70  | Healthcare Practitioners and Technical Occupations and Protective Service Occupations (i.e. first responders)* | Cross-sectional survey | 05/01 - 05/14 | United States of America | 4.29%              | High     |
| 16<br>17<br>18<br>19<br>20<br>21                         | First responders (mixed)*                                    | Martinez et al., 2020 <sup>121</sup>    | n=79  | Healthcare Practitioners and Technical Occupations and Protective Service Occupations (i.e. first responders)* | Cross-sectional survey | 04/16 - 04/17 | United States of America | 5.06%              | High     |
| 22<br>23<br>24<br>25<br>26<br>27                         | First responders (mixed)*                                    | Staletovich et al., 2020 <sup>122</sup> | n=359 | Healthcare Practitioners and Technical Occupations and Protective Service Occupations (i.e. first responders)* | Cross-sectional survey | 05/17 - 05/22 | United States of America | 0%                 | Unclear  |
| 28<br>29<br>30<br>31<br>32                               | Healthcare Practitioners and Technical Occupations (29-0000) | Hibino et al., 2020 <sup>123</sup>      | n=806 | Health Diagnosing and Treating Practitioners                                                                   | Cross-sectional survey | 06/01 - 07/30 | Japan                    | 0.74% (0.27-1.61%) | Unclear  |
| 33<br>34<br>35<br>36<br>37                               | Healthcare Practitioners and Technical Occupations (29-0000) | Jones et al., 2020 <sup>29</sup>        | n=856 | Dentists, General                                                                                              | Cross-sectional survey | 01/15 - 06/15 | The United Kingdom       | 7.9%               | High     |
| 38<br>39<br>40<br>41<br>42<br>43<br>44<br>45<br>46<br>47 | Life, Physical, and Social Science                           | Calcagno et al., 2020 <sup>124</sup>    | n=343 | Life, Physical, and Social Science Occupations                                                                 | Cross-sectional survey | 04/17 - 05/20 | Italy                    | 6.71%              | Moderate |



|                                                              |                                      |       |                              |                        |               |                          |                 |          |
|--------------------------------------------------------------|--------------------------------------|-------|------------------------------|------------------------|---------------|--------------------------|-----------------|----------|
| Occupations (19-0000)                                        |                                      |       |                              |                        |               |                          |                 |          |
| Healthcare Practitioners and Technical Occupations (29-0000) | Goenka et al., 2020 <sup>25</sup>    | n=49  | Dietitians and Nutritionists | Cross-sectional survey | 07/12 - 08/23 | India                    | 18.37%          | Moderate |
| Healthcare Practitioners and Technical Occupations (29-0000) | Goenka et al., 2020 <sup>26</sup>    | n=6   | Dietitians and Nutritionists | Cross-sectional survey | 08/01 - 08/31 | India                    | 0%              | High     |
| Healthcare Practitioners and Technical Occupations (29-0000) | Akinbami et al., 2020 <sup>46</sup>  | n=321 | Pharmacists                  | Cross-sectional survey | 05/18 - 06/13 | United States of America | 4.4% (2.4-7.2%) | Moderate |
| Healthcare Practitioners and Technical Occupations (29-0000) | Alharbi et al., 2020 <sup>125</sup>  | n=5   | Pharmacists                  | Cross-sectional survey | 04/18 - 06/17 | Saudi Arabia             | 0%              | High     |
| Healthcare Practitioners and Technical Occupations (29-0000) | Calcagno et al., 2020 <sup>124</sup> | n=29  | Pharmacists                  | Cross-sectional survey | 04/17 - 05/20 | Italy                    | 3.45%           | Moderate |
| Healthcare Practitioners and Technical Occupations (29-0000) | Chau et al., 2020 <sup>126</sup>     | n=17  | Pharmacists                  | Cross-sectional survey | 08/23 - 08/30 | Viet Nam                 | 0%              | High     |
| Healthcare Practitioners and Technical Occupations (29-0000) | Hanrath et al., 2020 <sup>32</sup>   | n=189 | Pharmacists                  | Cross-sectional survey | 05/29 - 07/06 | The United Kingdom       | 4.76%           | High     |

|                                                              |                                    |       |                         |                        |               |                          |                 |          |
|--------------------------------------------------------------|------------------------------------|-------|-------------------------|------------------------|---------------|--------------------------|-----------------|----------|
| Healthcare Practitioners and Technical Occupations (29-0000) | Khan et al., 2020 <sup>127</sup>   | n=109 | Pharmacists             | Cross-sectional survey | 06/15 - 06/29 | India                    | 0%              | Moderate |
| Healthcare Practitioners and Technical Occupations (29-0000) | Mahomed et al., 2020 <sup>81</sup> | n=404 | Pharmacists             | Cross-sectional survey | 08/31 - 10/12 | Mozambique               | 0.5%            | High     |
| Healthcare Practitioners and Technical Occupations (29-0000) | Martin et al., 2020 <sup>23</sup>  | n=113 | Pharmacists             | Cross-sectional survey | 05/29 - 07/13 | The United Kingdom       | 0%              | Moderate |
| Healthcare Practitioners and Technical Occupations (29-0000) | Rosser et al., 2020 <sup>33</sup>  | n=213 | Pharmacists             | Cross-sectional survey | 04/20 - 05/20 | United States of America | 1.88%           | High     |
| Healthcare Practitioners and Technical Occupations (29-0000) | Costa et al., 2020 <sup>128</sup>  | n=652 | Physicians and Surgeons | Cross-sectional survey | 05/14 - 05/28 | Brazil                   | 5.8%            | Moderate |
| Healthcare Practitioners and Technical Occupations (29-0000) | Mohr et al., 2020 <sup>129</sup>   | n=372 | Physicians and Surgeons | Cross-sectional survey | 05/13 - 07/08 | United States of America | 1.61%           | Moderate |
| Healthcare Practitioners and Technical Occupations (29-0000) | Nishida et al., 2020 <sup>90</sup> | n=63  | Physicians and Surgeons | Cross-sectional survey | 06/12 - 06/19 | Japan                    | 3.2% (0.88-11%) | Moderate |
| Healthcare Practitioners and                                 | Noor et al., 2020 <sup>130</sup>   | n=157 | Physicians and Surgeons | Cross-sectional survey | 07/13 - 07/15 | Pakistan                 | 17.83%          | Moderate |

|    |                                                              |                                      |        |                                    |                                                                                   |               |                          |                 |          |
|----|--------------------------------------------------------------|--------------------------------------|--------|------------------------------------|-----------------------------------------------------------------------------------|---------------|--------------------------|-----------------|----------|
| 1  | Technical Occupations (29-0000)                              |                                      |        |                                    |                                                                                   |               |                          |                 |          |
| 2  |                                                              |                                      |        |                                    |                                                                                   |               |                          |                 |          |
| 3  |                                                              |                                      |        |                                    |                                                                                   |               |                          |                 |          |
| 4  | Healthcare Practitioners and Technical Occupations (29-0000) | Singhal et al., 2020 <sup>131</sup>  | n=208  | Physicians and Surgeons            | Cross-sectional survey                                                            | 06/01 - 06/30 | India                    | 12.5%           | High     |
| 5  |                                                              |                                      |        |                                    |                                                                                   |               |                          |                 |          |
| 6  |                                                              |                                      |        |                                    |                                                                                   |               |                          |                 |          |
| 7  | Healthcare Practitioners and Technical Occupations (29-0000) | Morcuende et al., 2020 <sup>88</sup> | n=23   | Anesthesiologists                  | Cross-sectional survey                                                            | 03/01 - 04/21 | United States of America | 13.04%          | High     |
| 8  |                                                              |                                      |        |                                    |                                                                                   |               |                          |                 |          |
| 9  |                                                              |                                      |        |                                    |                                                                                   |               |                          |                 |          |
| 10 |                                                              |                                      |        |                                    |                                                                                   |               |                          |                 |          |
| 11 | Healthcare Practitioners and Technical Occupations (29-0000) | Morcuende et al., 2020 <sup>88</sup> | n=3    | Obstetricians and Gynecologists    | Cross-sectional survey                                                            | 03/01 - 04/21 | United States of America | 100%            | High     |
| 12 |                                                              |                                      |        |                                    |                                                                                   |               |                          |                 |          |
| 13 |                                                              |                                      |        |                                    |                                                                                   |               |                          |                 |          |
| 14 |                                                              |                                      |        |                                    |                                                                                   |               |                          |                 |          |
| 15 |                                                              |                                      |        |                                    |                                                                                   |               |                          |                 |          |
| 16 |                                                              |                                      |        |                                    |                                                                                   |               |                          |                 |          |
| 17 | Healthcare Practitioners and Technical Occupations (29-0000) | Urbieto et al., 2020 <sup>132</sup>  | n=23   | Pediatricians, General             | Cross-sectional survey                                                            | 04/14 - 04/16 | Spain                    | 4.3%            | High     |
| 18 |                                                              |                                      |        |                                    |                                                                                   |               |                          |                 |          |
| 19 |                                                              |                                      |        |                                    |                                                                                   |               |                          |                 |          |
| 20 |                                                              |                                      |        |                                    |                                                                                   |               |                          |                 |          |
| 21 |                                                              |                                      |        |                                    |                                                                                   |               |                          |                 |          |
| 22 | Healthcare Practitioners and Technical Occupations (29-0000) | Iversen et al., 2020 <sup>8</sup>    | n=1944 | Psychiatrists                      | Cross-sectional survey                                                            | 04/15 - 04/22 | Denmark                  | 1.85%           | Low      |
| 23 |                                                              |                                      |        |                                    |                                                                                   |               |                          |                 |          |
| 24 |                                                              |                                      |        |                                    |                                                                                   |               |                          |                 |          |
| 25 |                                                              |                                      |        |                                    |                                                                                   |               |                          |                 |          |
| 26 |                                                              |                                      |        |                                    |                                                                                   |               |                          |                 |          |
| 27 | Healthcare Practitioners and Technical Occupations (29-0000) | Leidner et al., 2020 <sup>22</sup>   | n=301  | Surgeons                           | Cross sectional study with prospective cohort follow up of a subset of the sample | 04/08 - 05/22 | United States of America | 2.66%           | High     |
| 28 |                                                              |                                      |        |                                    |                                                                                   |               |                          |                 |          |
| 29 |                                                              |                                      |        |                                    |                                                                                   |               |                          |                 |          |
| 30 |                                                              |                                      |        |                                    |                                                                                   |               |                          |                 |          |
| 31 |                                                              |                                      |        |                                    |                                                                                   |               |                          |                 |          |
| 32 |                                                              |                                      |        |                                    |                                                                                   |               |                          |                 |          |
| 33 | Healthcare Practitioners and Technical Occupations (29-0000) | Akinbami et al., 2020 <sup>46</sup>  | n=2297 | Physicians and Surgeons, All Other | Cross-sectional survey                                                            | 05/18 - 06/13 | United States of America | 6.1% (5.1-7.1%) | Moderate |
| 34 |                                                              |                                      |        |                                    |                                                                                   |               |                          |                 |          |
| 35 |                                                              |                                      |        |                                    |                                                                                   |               |                          |                 |          |
| 36 |                                                              |                                      |        |                                    |                                                                                   |               |                          |                 |          |
| 37 |                                                              |                                      |        |                                    |                                                                                   |               |                          |                 |          |
| 38 |                                                              |                                      |        |                                    |                                                                                   |               |                          |                 |          |
| 39 |                                                              |                                      |        |                                    |                                                                                   |               |                          |                 |          |
| 40 |                                                              |                                      |        |                                    |                                                                                   |               |                          |                 |          |
| 41 |                                                              |                                      |        |                                    |                                                                                   |               |                          |                 |          |
| 42 |                                                              |                                      |        |                                    |                                                                                   |               |                          |                 |          |
| 43 |                                                              |                                      |        |                                    |                                                                                   |               |                          |                 |          |
| 44 |                                                              |                                      |        |                                    |                                                                                   |               |                          |                 |          |
| 45 |                                                              |                                      |        |                                    |                                                                                   |               |                          |                 |          |
| 46 |                                                              |                                      |        |                                    |                                                                                   |               |                          |                 |          |
| 47 |                                                              |                                      |        |                                    |                                                                                   |               |                          |                 |          |

|                                                              |                                     |        |                                    |                                                              |               |              |        |          |
|--------------------------------------------------------------|-------------------------------------|--------|------------------------------------|--------------------------------------------------------------|---------------|--------------|--------|----------|
| Occupations (29-0000)                                        |                                     |        |                                    |                                                              |               |              |        |          |
| Healthcare Practitioners and Technical Occupations (29-0000) | Alharbi et al., 2020 <sup>125</sup> | n=18   | Physicians and Surgeons, All Other | Cross-sectional survey                                       | 04/18 - 06/17 | Saudi Arabia | 27.78% | High     |
| Healthcare Practitioners and Technical Occupations (29-0000) | Amendola et al., 2020 <sup>47</sup> | n=214  | Physicians and Surgeons, All Other | Cross-sectional survey                                       | 04/15 - 04/15 | Italy        | 4.67%  | High     |
| Healthcare Practitioners and Technical Occupations (29-0000) | Baracco et al., 2020 <sup>24</sup>  | n=417  | Physicians and Surgeons, All Other | Cross-sectional survey                                       | 04/23 - 05/05 | Italy        | 17%    | High     |
| Healthcare Practitioners and Technical Occupations (29-0000) | Barallat et al., 2020 <sup>50</sup> | n=1821 | Physicians and Surgeons, All Other | Cross-sectional survey                                       | 05/04 - 05/22 | Spain        | 11.81% | High     |
| Healthcare Practitioners and Technical Occupations (29-0000) | Bianchi et al., 2020 <sup>133</sup> | n=34   | Physicians and Surgeons, All Other | Cross-sectional survey                                       | 04/15 - 05/15 | Italy        | 5.88%  | Unclear  |
| Healthcare Practitioners and Technical Occupations (29-0000) | Blairon et al., 2020 <sup>52</sup>  | n=323  | Physicians and Surgeons, All Other | Cross-sectional survey                                       | 05/25 - 06/19 | Belgium      | 11.8%  | High     |
| Healthcare Practitioners and Technical Occupations (29-0000) | Brehm et al., 2020 <sup>7</sup>     | n=275  | Physicians and Surgeons, All Other | Cross sectional study with prospective cohort follow up of a | 03/20 - 07/17 | Germany      | 3.3%   | Moderate |

|                                                              |                                       |       |                                    |                        |               |                    |        |          |
|--------------------------------------------------------------|---------------------------------------|-------|------------------------------------|------------------------|---------------|--------------------|--------|----------|
|                                                              |                                       |       |                                    | subset of the sample   |               |                    |        |          |
| Healthcare Practitioners and Technical Occupations (29-0000) | Brousseau et al., 2020 <sup>134</sup> | n=432 | Physicians and Surgeons, All Other | Cross-sectional survey | 07/06 - 09/24 | Canada             | 7.2%   | High     |
| Healthcare Practitioners and Technical Occupations (29-0000) | Calcagno et al., 2020 <sup>124</sup>  | n=700 | Physicians and Surgeons, All Other | Cross-sectional survey | 04/17 - 05/20 | Italy              | 7.86%  | Moderate |
| Healthcare Practitioners and Technical Occupations (29-0000) | Chau et al., 2020 <sup>126</sup>      | n=64  | Physicians and Surgeons, All Other | Cross-sectional survey | 08/23 - 08/30 | Viet Nam           | 0%     | High     |
| Healthcare Practitioners and Technical Occupations (29-0000) | Chen et al., 2020 <sup>135</sup>      | n=17  | Physicians and Surgeons, All Other | Cross-sectional survey | 02/19 - 02/19 | China              | 41.18% | High     |
| Healthcare Practitioners and Technical Occupations (29-0000) | Erber et al., 2020 <sup>31</sup>      | n=860 | Physicians and Surgeons, All Other | Cross-sectional survey | 04/14 - 05/29 | Germany            | 1.63%  | High     |
| Healthcare Practitioners and Technical Occupations (29-0000) | Favara et al., 2020 <sup>136</sup>    | n=15  | Physicians and Surgeons, All Other | Prospective cohort     | 06/01 - 06/07 | The United Kingdom | 13.33% | High     |
| Healthcare Practitioners and Technical Occupations (29-0000) | Favara et al., 2020 <sup>19</sup>     | n=82  | Physicians and Surgeons, All Other | Cross-sectional survey | 07/13 - 07/13 | The United Kingdom | 10.9%  | High     |

|                                                              |                                      |       |                                    |                        |               |                          |        |          |
|--------------------------------------------------------------|--------------------------------------|-------|------------------------------------|------------------------|---------------|--------------------------|--------|----------|
| Healthcare Practitioners and Technical Occupations (29-0000) | Fujita et al., 2020 <sup>137</sup>   | n=42  | Physicians and Surgeons, All Other | Cross-sectional survey | 04/10 - 04/20 | Japan                    | 4.7%   | High     |
| Healthcare Practitioners and Technical Occupations (29-0000) | Galan et al., 2020 <sup>20</sup>     | n=564 | Physicians and Surgeons, All Other | Cross-sectional survey | 04/14 - 04/27 | Spain                    | 39.36% | High     |
| Healthcare Practitioners and Technical Occupations (29-0000) | Godbout et al., 2020 <sup>138</sup>  | n=490 | Physicians and Surgeons, All Other | Cross-sectional survey | 07/27 - 10/02 | United States of America | 1.43%  | High     |
| Healthcare Practitioners and Technical Occupations (29-0000) | Goenka et al., 2020 <sup>25</sup>    | n=255 | Physicians and Surgeons, All Other | Cross-sectional survey | 07/12 - 08/23 | India                    | 3.92%  | Moderate |
| Healthcare Practitioners and Technical Occupations (29-0000) | Goenka et al., 2020 <sup>26</sup>    | n=29  | Physicians and Surgeons, All Other | Cross-sectional survey | 08/01 - 08/31 | India                    | 20.69% | High     |
| Healthcare Practitioners and Technical Occupations (29-0000) | Hanrath et al., 2020 <sup>32</sup>   | n=899 | Physicians and Surgeons, All Other | Cross-sectional survey | 05/29 - 07/06 | The United Kingdom       | 7.01%  | High     |
| Healthcare Practitioners and Technical Occupations (29-0000) | Houlihan et al., 2020 <sup>139</sup> | n=72  | Physicians and Surgeons, All Other | Cross-sectional survey | 03/26 - 04/08 | The United Kingdom       | 22%    | High     |
| Healthcare Practitioners and                                 | Hunter et al., 2020 <sup>21</sup>    | n=279 | Physicians and Surgeons, All Other | Cross-sectional survey | 04/29 - 05/08 | United States of America | 1.08%  | High     |

|    |                                                              |                                     |        |                                    |                        |               |                          |                 |      |
|----|--------------------------------------------------------------|-------------------------------------|--------|------------------------------------|------------------------|---------------|--------------------------|-----------------|------|
| 1  | Technical Occupations (29-0000)                              |                                     |        |                                    |                        |               |                          |                 |      |
| 2  |                                                              |                                     |        |                                    |                        |               |                          |                 |      |
| 3  |                                                              |                                     |        |                                    |                        |               |                          |                 |      |
| 4  | Healthcare Practitioners and Technical Occupations (29-0000) | Insua et al., 2020 <sup>140</sup>   | n=116  | Physicians and Surgeons, All Other | Cross-sectional survey | 06/08 - 06/09 | Argentina                | 0.9% (0.1-5.5%) | High |
| 5  |                                                              |                                     |        |                                    |                        |               |                          |                 |      |
| 6  |                                                              |                                     |        |                                    |                        |               |                          |                 |      |
| 7  | Healthcare Practitioners and Technical Occupations (29-0000) | Iversen et al., 2020 <sup>8</sup>   | n=4698 | Physicians and Surgeons, All Other | Cross-sectional survey | 04/15 - 04/22 | Denmark                  | 4.07%           | Low  |
| 8  |                                                              |                                     |        |                                    |                        |               |                          |                 |      |
| 9  |                                                              |                                     |        |                                    |                        |               |                          |                 |      |
| 10 |                                                              |                                     |        |                                    |                        |               |                          |                 |      |
| 11 | Healthcare Practitioners and Technical Occupations (29-0000) | Iversen et al., 2020 <sup>8</sup>   | n=113  | Physicians and Surgeons, All Other | Cross-sectional survey | 04/15 - 04/22 | Denmark                  | 7.08%           | Low  |
| 12 |                                                              |                                     |        |                                    |                        |               |                          |                 |      |
| 13 |                                                              |                                     |        |                                    |                        |               |                          |                 |      |
| 14 |                                                              |                                     |        |                                    |                        |               |                          |                 |      |
| 15 |                                                              |                                     |        |                                    |                        |               |                          |                 |      |
| 16 |                                                              |                                     |        |                                    |                        |               |                          |                 |      |
| 17 | Healthcare Practitioners and Technical Occupations (29-0000) | Jeremias et al., 2020 <sup>70</sup> | n=79   | Physicians and Surgeons, All Other | Cross-sectional survey | 03/01 - 04/30 | United States of America | 11.4%           | High |
| 18 |                                                              |                                     |        |                                    |                        |               |                          |                 |      |
| 19 |                                                              |                                     |        |                                    |                        |               |                          |                 |      |
| 20 |                                                              |                                     |        |                                    |                        |               |                          |                 |      |
| 21 |                                                              |                                     |        |                                    |                        |               |                          |                 |      |
| 22 | Healthcare Practitioners and Technical Occupations (29-0000) | Kassem et al., 2020 <sup>72</sup>   | n=30   | Physicians and Surgeons, All Other | Cross-sectional survey | 06/01 - 06/14 | Egypt                    | 6.66%           | High |
| 23 |                                                              |                                     |        |                                    |                        |               |                          |                 |      |
| 24 |                                                              |                                     |        |                                    |                        |               |                          |                 |      |
| 25 |                                                              |                                     |        |                                    |                        |               |                          |                 |      |
| 26 |                                                              |                                     |        |                                    |                        |               |                          |                 |      |
| 27 | Healthcare Practitioners and Technical Occupations (29-0000) | Kassem et al., 2020 <sup>72</sup>   | n=30   | Physicians and Surgeons, All Other | Cross-sectional survey | 06/01 - 06/14 | Egypt                    | 3.33%           | High |
| 28 |                                                              |                                     |        |                                    |                        |               |                          |                 |      |
| 29 |                                                              |                                     |        |                                    |                        |               |                          |                 |      |
| 30 |                                                              |                                     |        |                                    |                        |               |                          |                 |      |
| 31 |                                                              |                                     |        |                                    |                        |               |                          |                 |      |
| 32 | Healthcare Practitioners and Technical Occupations (29-0000) | Kassem et al., 2020 <sup>72</sup>   | n=30   | Physicians and Surgeons, All Other | Cross-sectional survey | 06/01 - 06/14 | Egypt                    | 0%              | High |
| 33 |                                                              |                                     |        |                                    |                        |               |                          |                 |      |
| 34 |                                                              |                                     |        |                                    |                        |               |                          |                 |      |
| 35 |                                                              |                                     |        |                                    |                        |               |                          |                 |      |
| 36 |                                                              |                                     |        |                                    |                        |               |                          |                 |      |
| 37 | Healthcare Practitioners and Technical Occupations (29-0000) | Kassem et al., 2020 <sup>72</sup>   | n=30   | Physicians and Surgeons, All Other | Cross-sectional survey | 06/01 - 06/14 | Egypt                    | 0%              | High |
| 38 |                                                              |                                     |        |                                    |                        |               |                          |                 |      |
| 39 |                                                              |                                     |        |                                    |                        |               |                          |                 |      |
| 40 |                                                              |                                     |        |                                    |                        |               |                          |                 |      |
| 41 |                                                              |                                     |        |                                    |                        |               |                          |                 |      |
| 42 |                                                              |                                     |        |                                    |                        |               |                          |                 |      |
| 43 |                                                              |                                     |        |                                    |                        |               |                          |                 |      |
| 44 |                                                              |                                     |        |                                    |                        |               |                          |                 |      |
| 45 |                                                              |                                     |        |                                    |                        |               |                          |                 |      |
| 46 |                                                              |                                     |        |                                    |                        |               |                          |                 |      |
| 47 |                                                              |                                     |        |                                    |                        |               |                          |                 |      |

|                                                              |                                    |        |                                    |                                                                                   |               |                          |                |          |
|--------------------------------------------------------------|------------------------------------|--------|------------------------------------|-----------------------------------------------------------------------------------|---------------|--------------------------|----------------|----------|
| Occupations (29-0000)                                        |                                    |        |                                    |                                                                                   |               |                          |                |          |
| Healthcare Practitioners and Technical Occupations (29-0000) | Kassem et al., 2020 <sup>72</sup>  | n=30   | Physicians and Surgeons, All Other | Cross-sectional survey                                                            | 06/01 - 06/14 | Egypt                    | 3.33%          | High     |
| Healthcare Practitioners and Technical Occupations (29-0000) | Khan et al., 2020 <sup>127</sup>   | n=980  | Physicians and Surgeons, All Other | Cross-sectional survey                                                            | 06/15 - 06/29 | India                    | 2.8% (1.9-4%)  | Moderate |
| Healthcare Practitioners and Technical Occupations (29-0000) | Kohler et al., 2020 <sup>141</sup> | n=268  | Physicians and Surgeons, All Other | Cross-sectional survey                                                            | 03/19 - 04/03 | Switzerland              | 1.49%          | High     |
| Healthcare Practitioners and Technical Occupations (29-0000) | Kumar et al., 2020 <sup>142</sup>  | n=201  | Physicians and Surgeons, All Other | Cross-sectional survey                                                            | 06/01 - 06/30 | India                    | 7% (4.2-11.4%) | High     |
| Healthcare Practitioners and Technical Occupations (29-0000) | Leidner et al., 2020 <sup>22</sup> | n=1081 | Physicians and Surgeons, All Other | Cross sectional study with prospective cohort follow up of a subset of the sample | 04/08 - 05/22 | United States of America | 3.33%          | High     |
| Healthcare Practitioners and Technical Occupations (29-0000) | Lumley et al., 2020 <sup>9</sup>   | n=1859 | Physicians and Surgeons, All Other | Prospective cohort                                                                | 04/23 - 11/30 | The United Kingdom       | 10.11%         | Moderate |
| Healthcare Practitioners and Technical                       | Martin et al., 2020 <sup>23</sup>  | n=1243 | Physicians and Surgeons, All Other | Cross-sectional survey                                                            | 05/29 - 07/13 | The United Kingdom       | 10.3%          | Moderate |



|                                                              |                                       |        |                                    |                        |               |                          |                  |          |
|--------------------------------------------------------------|---------------------------------------|--------|------------------------------------|------------------------|---------------|--------------------------|------------------|----------|
| Occupations (29-0000)                                        |                                       |        |                                    |                        |               |                          |                  |          |
| Healthcare Practitioners and Technical Occupations (29-0000) | Mesnil et al., 2020 <sup>143</sup>    | n=111  | Physicians and Surgeons, All Other | Cross-sectional survey | 06/08 - 06/22 | France                   | 11%              | High     |
| Healthcare Practitioners and Technical Occupations (29-0000) | Missaglia et al., 2020 <sup>144</sup> | n=377  | Physicians and Surgeons, All Other | Cross-sectional survey | 04/01 - 04/30 | Italy                    | 14.9%            | High     |
| Healthcare Practitioners and Technical Occupations (29-0000) | Mohr et al., 2020 <sup>129</sup>      | n=272  | Physicians and Surgeons, All Other | Cross-sectional survey | 05/13 - 07/08 | United States of America | 2.94%            | Moderate |
| Healthcare Practitioners and Technical Occupations (29-0000) | Moscola et al., 2020 <sup>89</sup>    | n=3746 | Physicians and Surgeons, All Other | Cross-sectional survey | 04/20 - 06/23 | United States of America | 8.7%             | High     |
| Healthcare Practitioners and Technical Occupations (29-0000) | Nishida et al., 2020 <sup>90</sup>    | n=149  | Physicians and Surgeons, All Other | Cross-sectional survey | 06/12 - 06/19 | Japan                    | 1.3% (0.37-4.8%) | Moderate |
| Healthcare Practitioners and Technical Occupations (29-0000) | Nishida et al., 2020 <sup>90</sup>    | n=46   | Physicians and Surgeons, All Other | Cross-sectional survey | 06/12 - 06/19 | Japan                    | 0%               | Moderate |
| Healthcare Practitioners and Technical Occupations (29-0000) | Nishida et al., 2020 <sup>90</sup>    | n=40   | Physicians and Surgeons, All Other | Cross-sectional survey | 06/12 - 06/19 | Japan                    | 0%               | Moderate |

|                                                              |                                         |        |                                    |                        |               |                          |                   |          |
|--------------------------------------------------------------|-----------------------------------------|--------|------------------------------------|------------------------|---------------|--------------------------|-------------------|----------|
| Healthcare Practitioners and Technical Occupations (29-0000) | Nishida et al., 2020 <sup>90</sup>      | n=59   | Physicians and Surgeons, All Other | Cross-sectional survey | 06/12 - 06/19 | Japan                    | 1.7% (0.3-9%)     | Moderate |
| Healthcare Practitioners and Technical Occupations (29-0000) | Nishida et al., 2020 <sup>90</sup>      | n=925  | Physicians and Surgeons, All Other | Cross-sectional survey | 06/12 - 06/19 | Japan                    | 0.43% (0.17-1.1%) | Moderate |
| Healthcare Practitioners and Technical Occupations (29-0000) | Noor et al., 2020 <sup>130</sup>        | n=303  | Physicians and Surgeons, All Other | Cross-sectional survey | 07/13 - 07/15 | Pakistan                 | 19.8%             | Moderate |
| Healthcare Practitioners and Technical Occupations (29-0000) | Orth-Holler et al., 2020 <sup>145</sup> | n=377  | Physicians and Surgeons, All Other | Cross-sectional survey | 03/20 - 03/27 | Austria                  | 0.3% (0.01-1.5%)  | High     |
| Healthcare Practitioners and Technical Occupations (29-0000) | Plebani et al., 2020 <sup>146</sup>     | n=2337 | Physicians and Surgeons, All Other | Cross-sectional survey | 02/22 - 05/29 | Italy                    | 3.6% (2.8-4.4%)   | High     |
| Healthcare Practitioners and Technical Occupations (29-0000) | Rosser et al., 2020 <sup>33</sup>       | n=2533 | Physicians and Surgeons, All Other | Cross-sectional survey | 04/20 - 05/20 | United States of America | 1.07%             | High     |
| Healthcare Practitioners and Technical Occupations (29-0000) | Rudberg et al., 2020 <sup>147</sup>     | n=439  | Physicians and Surgeons, All Other | Cross-sectional survey | 04/14 - 05/08 | Sweden                   | 19.1%             | Moderate |
| Healthcare Practitioners and                                 | Schmidt et al., 2020 <sup>148</sup>     | n=34   | Physicians and Surgeons, All Other | Cross-sectional survey | 04/20 - 04/30 | Germany                  | 8.82%             | High     |

|                                                              |                                       |       |                                    |                        |               |                          |       |          |
|--------------------------------------------------------------|---------------------------------------|-------|------------------------------------|------------------------|---------------|--------------------------|-------|----------|
| Technical Occupations (29-0000)                              |                                       |       |                                    |                        |               |                          |       |          |
| Healthcare Practitioners and Technical Occupations (29-0000) | Sotgiu et al., 2020 <sup>149</sup>    | n=115 | Physicians and Surgeons, All Other | Cross-sectional survey | 04/02 - 04/16 | Italy                    | 6.09% | High     |
| Healthcare Practitioners and Technical Occupations (29-0000) | Venugopal et al., 2020 <sup>150</sup> | n=157 | Physicians and Surgeons, All Other | Cross-sectional survey | 03/01 - 05/01 | United States of America | 25%   | Moderate |
| Healthcare Practitioners and Technical Occupations (29-0000) | Yogo et al., 2020 <sup>36</sup>       | n=110 | Physicians and Surgeons, All Other | Cross-sectional survey | 05/20 - 06/08 | United States of America | 1.82% | High     |
| Healthcare Practitioners and Technical Occupations (29-0000) | Brzostek et al., 2020 <sup>151</sup>  | n=998 | Physician Assistants               | Cross-sectional survey | 04/17 - 05/07 | United States of America | 28.3% | Moderate |
| Healthcare Practitioners and Technical Occupations (29-0000) | Hoffmann et al., 2020 <sup>152</sup>  | n=156 | Physician Assistants               | Prospective cohort     | 07/01 - 07/31 | Germany                  | 1.3%  | High     |
| Healthcare Practitioners and Technical Occupations (29-0000) | Mohr et al., 2020 <sup>129</sup>      | n=156 | Physician Assistants               | Cross-sectional survey | 05/13 - 07/08 | United States of America | 0.64% | Moderate |
| Healthcare Practitioners and Technical                       | Morcuende et al., 2020 <sup>88</sup>  | n=6   | Physician Assistants               | Cross-sectional survey | 03/01 - 04/21 | United States of America | 9.43% | High     |

|                                                              |                                      |       |                         |                        |               |                          |                 |          |
|--------------------------------------------------------------|--------------------------------------|-------|-------------------------|------------------------|---------------|--------------------------|-----------------|----------|
| Occupations (29-0000)                                        |                                      |       |                         |                        |               |                          |                 |          |
| Healthcare Practitioners and Technical Occupations (29-0000) | Morcuende et al., 2020 <sup>88</sup> | n=53  | Physician Assistants    | Cross-sectional survey | 03/01 - 04/21 | United States of America | 9.43%           | High     |
| Healthcare Practitioners and Technical Occupations (29-0000) | Patel et al., 2020 <sup>153</sup>    | n=230 | Physician Assistants    | Prospective cohort     | 06/02 - 06/27 | United States of America | 3.48%           | High     |
| Healthcare Practitioners and Technical Occupations (29-0000) | Self et al., 2020 <sup>154</sup>     | n=919 | Physician Assistants    | Cross-sectional survey | 04/03 - 06/19 | United States of America | 5.66%           | Moderate |
| Healthcare Practitioners and Technical Occupations (29-0000) | Shah et al., 2020 <sup>155</sup>     | n=248 | Physician Assistants    | Cross-sectional survey | 05/25 - 07/09 | United States of America | 0%              | High     |
| Healthcare Practitioners and Technical Occupations (29-0000) | Shah et al., 2020 <sup>155</sup>     | n=320 | Physician Assistants    | Cross-sectional survey | 05/25 - 07/09 | United States of America | 0.63%           | High     |
| Healthcare Practitioners and Technical Occupations (29-0000) | Lumley et al., 2020 <sup>9</sup>     | n=386 | Occupational Therapists | Prospective cohort     | 04/23 - 11/30 | The United Kingdom       | 11.4%           | Moderate |
| Healthcare Practitioners and Technical Occupations (29-0000) | Akinbami et al., 2020 <sup>46</sup>  | n=235 | Physical Therapists     | Cross-sectional survey | 05/18 - 06/13 | United States of America | 10.6% (7-15.3%) | Moderate |

|                                                              |                                     |       |                        |                                                                                   |               |                          |                  |          |
|--------------------------------------------------------------|-------------------------------------|-------|------------------------|-----------------------------------------------------------------------------------|---------------|--------------------------|------------------|----------|
| Healthcare Practitioners and Technical Occupations (29-0000) | Brehm et al., 2020 <sup>7</sup>     | n=15  | Physical Therapists    | Cross sectional study with prospective cohort follow up of a subset of the sample | 03/20 - 07/17 | Germany                  | 0%               | Moderate |
| Healthcare Practitioners and Technical Occupations (29-0000) | Cooper et al., 2020 <sup>59</sup>   | n=84  | Physical Therapists    | Cross-sectional survey                                                            | 06/10 - 08/07 | The United Kingdom       | 10.71%           | Moderate |
| Healthcare Practitioners and Technical Occupations (29-0000) | Costa et al., 2020 <sup>128</sup>   | n=159 | Physical Therapists    | Cross-sectional survey                                                            | 05/14 - 05/28 | Brazil                   | 10.7%            | Moderate |
| Healthcare Practitioners and Technical Occupations (29-0000) | Akinbami et al., 2020 <sup>46</sup> | n=409 | Respiratory Therapists | Cross-sectional survey                                                            | 05/18 - 06/13 | United States of America | 8.3% (5.8-11.4%) | Moderate |
| Healthcare Practitioners and Technical Occupations (29-0000) | Brunner et al., 2020 <sup>54</sup>  | n=42  | Respiratory Therapists | Cross-sectional survey                                                            | 05/04 - 05/29 | United States of America | 0%               | High     |
| Healthcare Practitioners and Technical Occupations (29-0000) | Godbout et al., 2020 <sup>138</sup> | n=25  | Respiratory Therapists | Cross-sectional survey                                                            | 07/27 - 10/02 | United States of America | 0%               | High     |
| Healthcare Practitioners and Technical Occupations (29-0000) | Hunter et al., 2020 <sup>21</sup>   | n=94  | Respiratory Therapists | Cross-sectional survey                                                            | 04/29 - 05/08 | United States of America | 0%               | High     |

|                                                              |                                      |        |                        |                        |               |                          |                 |          |
|--------------------------------------------------------------|--------------------------------------|--------|------------------------|------------------------|---------------|--------------------------|-----------------|----------|
| Healthcare Practitioners and Technical Occupations (29-0000) | Rosser et al., 2020 <sup>33</sup>    | n=135  | Respiratory Therapists | Cross-sectional survey | 04/20 - 05/20 | United States of America | 0%              | High     |
| Healthcare Practitioners and Technical Occupations (29-0000) | Self et al., 2020 <sup>154</sup>     | n=235  | Respiratory Therapists | Cross-sectional survey | 04/03 - 06/19 | United States of America | 4.26%           | Moderate |
| Healthcare Practitioners and Technical Occupations (29-0000) | Yogo et al., 2020 <sup>36</sup>      | n=121  | Respiratory Therapists | Cross-sectional survey | 05/20 - 06/08 | United States of America | 0%              | High     |
| Healthcare Practitioners and Technical Occupations (29-0000) | Rosser et al., 2020 <sup>33</sup>    | n=253  | Therapists, All Other  | Cross-sectional survey | 04/20 - 05/20 | United States of America | 1.58%           | High     |
| Healthcare Practitioners and Technical Occupations (29-0000) | Schmidt et al., 2020 <sup>148</sup>  | n=80   | Therapists, All Other  | Cross-sectional survey | 04/20 - 04/30 | Germany                  | 3.75%           | High     |
| Healthcare Practitioners and Technical Occupations (29-0000) | Yogo et al., 2020 <sup>36</sup>      | n=22   | Therapists, All Other  | Cross-sectional survey | 05/20 - 06/08 | United States of America | 4.55%           | High     |
| Healthcare Practitioners and Technical Occupations (29-0000) | Calcagno et al., 2020 <sup>124</sup> | n=13   | Veterinarians          | Cross-sectional survey | 04/17 - 05/20 | Italy                    | 0%              | Moderate |
| Healthcare Practitioners and                                 | Akinbami et al., 2020 <sup>46</sup>  | n=6426 | Registered Nurses      | Cross-sectional survey | 05/18 - 06/13 | United States of America | 7.7% (7.1-8.4%) | Moderate |

|                                                              |                                     |       |                   |                        |               |                    |                   |      |
|--------------------------------------------------------------|-------------------------------------|-------|-------------------|------------------------|---------------|--------------------|-------------------|------|
| Technical Occupations (29-0000)                              |                                     |       |                   |                        |               |                    |                   |      |
| Healthcare Practitioners and Technical Occupations (29-0000) | Alharbi et al., 2020 <sup>125</sup> | n=70  | Registered Nurses | Cross-sectional survey | 04/18 - 06/17 | Saudi Arabia       | 10%               | High |
| Healthcare Practitioners and Technical Occupations (29-0000) | Alharbi et al., 2020 <sup>125</sup> | n=9   | Registered Nurses | Cross-sectional survey | 04/18 - 06/17 | Saudi Arabia       | 33.33%            | High |
| Healthcare Practitioners and Technical Occupations (29-0000) | Alharbi et al., 2020 <sup>125</sup> | n=76  | Registered Nurses | Cross-sectional survey | 04/18 - 06/17 | Saudi Arabia       | 26.32%            | High |
| Healthcare Practitioners and Technical Occupations (29-0000) | Alharbi et al., 2020 <sup>125</sup> | n=21  | Registered Nurses | Cross-sectional survey | 04/18 - 06/17 | Saudi Arabia       | 14.29%            | High |
| Healthcare Practitioners and Technical Occupations (29-0000) | Alharbi et al., 2020 <sup>125</sup> | n=43  | Registered Nurses | Cross-sectional survey | 04/18 - 06/17 | Saudi Arabia       | 27.91%            | High |
| Healthcare Practitioners and Technical Occupations (29-0000) | Amendola et al., 2020 <sup>47</sup> | n=216 | Registered Nurses | Cross-sectional survey | 04/15 - 04/15 | Italy              | 6.02%             | High |
| Healthcare Practitioners and Technical                       | Bampoe et al., 2020 <sup>156</sup>  | n=52  | Registered Nurses | Cross-sectional survey | 05/11 - 06/05 | The United Kingdom | 13.5% (5.6-25.8%) | High |

|                                                              |                                       |        |                   |                                                                                   |               |                    |                   |          |
|--------------------------------------------------------------|---------------------------------------|--------|-------------------|-----------------------------------------------------------------------------------|---------------|--------------------|-------------------|----------|
| Occupations (29-0000)                                        |                                       |        |                   |                                                                                   |               |                    |                   |          |
| Healthcare Practitioners and Technical Occupations (29-0000) | Bampoe et al., 2020 <sup>156</sup>    | n=40   | Registered Nurses | Cross-sectional survey                                                            | 05/11 - 06/05 | The United Kingdom | 12.5% (4.2-26.8%) | High     |
| Healthcare Practitioners and Technical Occupations (29-0000) | Baracco et al., 2020 <sup>24</sup>    | n=1014 | Registered Nurses | Cross-sectional survey                                                            | 04/23 - 05/05 | Italy              | 17.9%             | High     |
| Healthcare Practitioners and Technical Occupations (29-0000) | Barallat et al., 2020 <sup>50</sup>   | n=2243 | Registered Nurses | Cross-sectional survey                                                            | 05/04 - 05/22 | Spain              | 10.64%            | High     |
| Healthcare Practitioners and Technical Occupations (29-0000) | Brehm et al., 2020 <sup>7</sup>       | n=444  | Registered Nurses | Cross sectional study with prospective cohort follow up of a subset of the sample | 03/20 - 07/17 | Germany            | 2.3%              | Moderate |
| Healthcare Practitioners and Technical Occupations (29-0000) | Brousseau et al., 2020 <sup>134</sup> | n=1189 | Registered Nurses | Cross-sectional survey                                                            | 07/06 - 09/24 | Canada             | 11.9%             | High     |
| Healthcare Practitioners and Technical Occupations (29-0000) | Calcagno et al., 2020 <sup>124</sup>  | n=1833 | Registered Nurses | Cross-sectional survey                                                            | 04/17 - 05/20 | Italy              | 8.18%             | Moderate |
| Healthcare Practitioners and Technical                       | Chau et al., 2020 <sup>126</sup>      | n=144  | Registered Nurses | Cross-sectional survey                                                            | 08/23 - 08/30 | Viet Nam           | 0%                | High     |



|                                                              |                                      |        |                   |                        |               |                          |        |          |
|--------------------------------------------------------------|--------------------------------------|--------|-------------------|------------------------|---------------|--------------------------|--------|----------|
| Occupations (29-0000)                                        |                                      |        |                   |                        |               |                          |        |          |
| Healthcare Practitioners and Technical Occupations (29-0000) | Chen et al., 2020 <sup>135</sup>     | n=25   | Registered Nurses | Cross-sectional survey | 02/19 - 02/19 | China                    | 8%     | High     |
| Healthcare Practitioners and Technical Occupations (29-0000) | Cooper et al., 2020 <sup>59</sup>    | n=3471 | Registered Nurses | Cross-sectional survey | 06/10 - 08/07 | The United Kingdom       | 7.52%  | Moderate |
| Healthcare Practitioners and Technical Occupations (29-0000) | Costa et al., 2020 <sup>128</sup>    | n=370  | Registered Nurses | Cross-sectional survey | 05/14 - 05/28 | Brazil                   | 11.4%  | Moderate |
| Healthcare Practitioners and Technical Occupations (29-0000) | Dimcheff et al., 2020 <sup>157</sup> | n=412  | Registered Nurses | Cross-sectional survey | 06/08 - 07/08 | United States of America | 7%     | Moderate |
| Healthcare Practitioners and Technical Occupations (29-0000) | Erber et al., 2020 <sup>31</sup>     | n=958  | Registered Nurses | Cross-sectional survey | 04/14 - 05/29 | Germany                  | 2.5%   | High     |
| Healthcare Practitioners and Technical Occupations (29-0000) | Favara et al., 2020 <sup>136</sup>   | n=45   | Registered Nurses | Prospective cohort     | 06/01 - 06/07 | The United Kingdom       | 28.89% | High     |
| Healthcare Practitioners and Technical Occupations (29-0000) | Favara et al., 2020 <sup>19</sup>    | n=237  | Registered Nurses | Cross-sectional survey | 07/13 - 07/13 | The United Kingdom       | 16.5%  | High     |

|                                                              |                                          |        |                   |                        |               |                          |        |          |
|--------------------------------------------------------------|------------------------------------------|--------|-------------------|------------------------|---------------|--------------------------|--------|----------|
| Healthcare Practitioners and Technical Occupations (29-0000) | Finkenzeller et al., 2020 <sup>158</sup> | n=251  | Registered Nurses | Prospective cohort     | 06/29 - 07/29 | Germany                  | 12%    | Moderate |
| Healthcare Practitioners and Technical Occupations (29-0000) | Finkenzeller et al., 2020 <sup>158</sup> | n=887  | Registered Nurses | Prospective cohort     | 06/29 - 07/29 | Germany                  | 20%    | Moderate |
| Healthcare Practitioners and Technical Occupations (29-0000) | Fujita et al., 2020 <sup>137</sup>       | n=50   | Registered Nurses | Cross-sectional survey | 04/10 - 04/20 | Japan                    | 6%     | High     |
| Healthcare Practitioners and Technical Occupations (29-0000) | Galan et al., 2020 <sup>20</sup>         | n=687  | Registered Nurses | Cross-sectional survey | 04/14 - 04/27 | Spain                    | 30.71% | High     |
| Healthcare Practitioners and Technical Occupations (29-0000) | Godbout et al., 2020 <sup>138</sup>      | n=937  | Registered Nurses | Cross-sectional survey | 07/27 - 10/02 | United States of America | 1.39%  | High     |
| Healthcare Practitioners and Technical Occupations (29-0000) | Goenka et al., 2020 <sup>25</sup>        | n=224  | Registered Nurses | Cross-sectional survey | 07/12 - 08/23 | India                    | 9.38%  | Moderate |
| Healthcare Practitioners and Technical Occupations (29-0000) | Goenka et al., 2020 <sup>26</sup>        | n=43   | Registered Nurses | Cross-sectional survey | 08/01 - 08/31 | India                    | 34.88% | High     |
| Healthcare Practitioners and                                 | Grant et al., 2020 <sup>159</sup>        | n=1345 | Registered Nurses | Cross-sectional survey | 05/15 - 06/05 | The United Kingdom       | 34.7%  | High     |

|                                                              |                                      |        |                   |                        |               |                          |                    |          |
|--------------------------------------------------------------|--------------------------------------|--------|-------------------|------------------------|---------------|--------------------------|--------------------|----------|
| Technical Occupations (29-0000)                              |                                      |        |                   |                        |               |                          |                    |          |
| Healthcare Practitioners and Technical Occupations (29-0000) | Grant et al., 2020 <sup>159</sup>    | n=108  | Registered Nurses | Cross-sectional survey | 05/15 - 06/05 | The United Kingdom       | 25%                | High     |
| Healthcare Practitioners and Technical Occupations (29-0000) | Hanrath et al., 2020 <sup>32</sup>   | n=749  | Registered Nurses | Cross-sectional survey | 05/29 - 07/06 | The United Kingdom       | 8.99%              | High     |
| Healthcare Practitioners and Technical Occupations (29-0000) | Haq et al., 2020 <sup>67</sup>       | n=209  | Registered Nurses | Cross-sectional survey | 06/15 - 06/29 | Pakistan                 | 38.8% (32.1-45.7%) | Moderate |
| Healthcare Practitioners and Technical Occupations (29-0000) | Houlihan et al., 2020 <sup>139</sup> | n=106  | Registered Nurses | Cross-sectional survey | 03/26 - 04/08 | The United Kingdom       | 24%                | High     |
| Healthcare Practitioners and Technical Occupations (29-0000) | Houlihan et al., 2020 <sup>139</sup> | n=22   | Registered Nurses | Cross-sectional survey | 03/26 - 04/08 | The United Kingdom       | 23%                | High     |
| Healthcare Practitioners and Technical Occupations (29-0000) | Hunter et al., 2020 <sup>21</sup>    | n=317  | Registered Nurses | Cross-sectional survey | 04/29 - 05/08 | United States of America | 2.2%               | High     |
| Healthcare Practitioners and Technical                       | Iversen et al., 2020 <sup>8</sup>    | n=9963 | Registered Nurses | Cross-sectional survey | 04/15 - 04/22 | Denmark                  | 4.03%              | Low      |

|                                                              |                                     |        |                   |                        |               |                          |        |      |
|--------------------------------------------------------------|-------------------------------------|--------|-------------------|------------------------|---------------|--------------------------|--------|------|
| Occupations (29-0000)                                        |                                     |        |                   |                        |               |                          |        |      |
| Healthcare Practitioners and Technical Occupations (29-0000) | Iversen et al., 2020 <sup>8</sup>   | n=1786 | Registered Nurses | Cross-sectional survey | 04/15 - 04/22 | Denmark                  | 4.65%  | Low  |
| Healthcare Practitioners and Technical Occupations (29-0000) | Jeremias et al., 2020 <sup>70</sup> | n=1043 | Registered Nurses | Cross-sectional survey | 03/01 - 04/30 | United States of America | 9.5%   | High |
| Healthcare Practitioners and Technical Occupations (29-0000) | Jones et al., 2020 <sup>29</sup>    | n=1962 | Registered Nurses | Cross-sectional survey | 01/15 - 06/15 | The United Kingdom       | 10.5%  | High |
| Healthcare Practitioners and Technical Occupations (29-0000) | Kassem et al., 2020 <sup>72</sup>   | n=28   | Registered Nurses | Cross-sectional survey | 06/01 - 06/14 | Egypt                    | 10.71% | High |
| Healthcare Practitioners and Technical Occupations (29-0000) | Kassem et al., 2020 <sup>72</sup>   | n=28   | Registered Nurses | Cross-sectional survey | 06/01 - 06/14 | Egypt                    | 7.14%  | High |
| Healthcare Practitioners and Technical Occupations (29-0000) | Kassem et al., 2020 <sup>72</sup>   | n=28   | Registered Nurses | Cross-sectional survey | 06/01 - 06/14 | Egypt                    | 3.57%  | High |
| Healthcare Practitioners and Technical Occupations (29-0000) | Kassem et al., 2020 <sup>72</sup>   | n=28   | Registered Nurses | Cross-sectional survey | 06/01 - 06/14 | Egypt                    | 0%     | High |

|                                                              |                                     |        |                   |                                                                                   |               |                          |                  |          |
|--------------------------------------------------------------|-------------------------------------|--------|-------------------|-----------------------------------------------------------------------------------|---------------|--------------------------|------------------|----------|
| Healthcare Practitioners and Technical Occupations (29-0000) | Khan et al., 2020 <sup>127</sup>    | n=321  | Registered Nurses | Cross-sectional survey                                                            | 06/15 - 06/29 | India                    | 2.8% (1.5-5.3%)  | Moderate |
| Healthcare Practitioners and Technical Occupations (29-0000) | Kohler et al., 2020 <sup>141</sup>  | n=398  | Registered Nurses | Cross-sectional survey                                                            | 03/19 - 04/03 | Switzerland              | 0.75%            | High     |
| Healthcare Practitioners and Technical Occupations (29-0000) | Kumar et al., 2020 <sup>142</sup>   | n=308  | Registered Nurses | Cross-sectional survey                                                            | 06/01 - 06/30 | India                    | 6.8% (4.5-10.2%) | High     |
| Healthcare Practitioners and Technical Occupations (29-0000) | Leidner et al., 2020 <sup>22</sup>  | n=110  | Registered Nurses | Cross sectional study with prospective cohort follow up of a subset of the sample | 04/08 - 05/22 | United States of America | 0%               | High     |
| Healthcare Practitioners and Technical Occupations (29-0000) | Leidner et al., 2020 <sup>22</sup>  | n=3504 | Registered Nurses | Cross sectional study with prospective cohort follow up of a subset of the sample | 04/08 - 05/22 | United States of America | 2.34%            | High     |
| Healthcare Practitioners and Technical Occupations (29-0000) | Lumley et al., 2020 <sup>9</sup>    | n=4528 | Registered Nurses | Prospective cohort                                                                | 04/23 - 11/30 | The United Kingdom       | 13.21%           | Moderate |
| Healthcare Practitioners and Technical Occupations (29-0000) | Mansour et al., 2020 <sup>160</sup> | n=285  | Registered Nurses | Cross-sectional survey                                                            | 03/24 - 04/04 | United States of America | 32.63%           | High     |

|                                                    |                                                              |                                      |         |                   |                        |               |                          |       |          |
|----------------------------------------------------|--------------------------------------------------------------|--------------------------------------|---------|-------------------|------------------------|---------------|--------------------------|-------|----------|
| 1<br>2<br>3<br>4<br>5<br>6<br>7<br>8               | Healthcare Practitioners and Technical Occupations (29-0000) | Martin et al., 2020 <sup>161</sup>   | n=580   | Registered Nurses | Cross-sectional survey | 04/01 - 04/15 | Spain                    | 5.52% | High     |
| 9<br>10<br>11<br>12<br>13                          | Healthcare Practitioners and Technical Occupations (29-0000) | Martin et al., 2020 <sup>161</sup>   | n=74    | Registered Nurses | Cross-sectional survey | 04/01 - 04/15 | Spain                    | 9.46% | High     |
| 14<br>15<br>16<br>17<br>18                         | Healthcare Practitioners and Technical Occupations (29-0000) | Martin et al., 2020 <sup>161</sup>   | n=676   | Registered Nurses | Cross-sectional survey | 04/01 - 04/15 | Spain                    | 5.92% | High     |
| 19<br>20<br>21<br>22<br>23                         | Healthcare Practitioners and Technical Occupations (29-0000) | Martin et al., 2020 <sup>161</sup>   | n=337   | Registered Nurses | Cross-sectional survey | 04/01 - 04/15 | Spain                    | 5.93% | High     |
| 24<br>25<br>26<br>27<br>28                         | Healthcare Practitioners and Technical Occupations (29-0000) | Martin et al., 2020 <sup>161</sup>   | n=339   | Registered Nurses | Cross-sectional survey | 04/01 - 04/15 | Spain                    | 5.9%  | High     |
| 29<br>30<br>31<br>32<br>33                         | Healthcare Practitioners and Technical Occupations (29-0000) | Meissner et al., 2020 <sup>162</sup> | n=439   | Registered Nurses | Cross-sectional survey | 04/14 - 05/06 | United States of America | 1.37% | High     |
| 34<br>35<br>36<br>37<br>38                         | Healthcare Practitioners and Technical Occupations (29-0000) | Mohr et al., 2020 <sup>129</sup>     | n=410   | Registered Nurses | Cross-sectional survey | 05/13 - 07/08 | United States of America | 1.46% | Moderate |
| 39<br>40<br>41<br>42<br>43<br>44<br>45<br>46<br>47 | Healthcare Practitioners and                                 | Moscola et al., 2020 <sup>89</sup>   | n=11468 | Registered Nurses | Cross-sectional survey | 04/20 - 06/23 | United States of America | 13.1% | High     |

|                                                              |                                      |        |                   |                                                                                   |               |                            |                  |          |
|--------------------------------------------------------------|--------------------------------------|--------|-------------------|-----------------------------------------------------------------------------------|---------------|----------------------------|------------------|----------|
| Technical Occupations (29-0000)                              |                                      |        |                   |                                                                                   |               |                            |                  |          |
| Healthcare Practitioners and Technical Occupations (29-0000) | Mostafa et al., 2020 <sup>163</sup>  | n=4040 | Registered Nurses | Cross-sectional survey                                                            | 04/22 - 05/14 | Egypt                      | 1.31%            | High     |
| Healthcare Practitioners and Technical Occupations (29-0000) | Nishida et al., 2020 <sup>90</sup>   | n=489  | Registered Nurses | Cross-sectional survey                                                            | 06/12 - 06/19 | Japan                      | 0.2% (0.04-1.1%) | Moderate |
| Healthcare Practitioners and Technical Occupations (29-0000) | Noor et al., 2020 <sup>130</sup>     | n=460  | Registered Nurses | Cross-sectional survey                                                            | 07/13 - 07/15 | Pakistan                   | 39.78%           | Moderate |
| Healthcare Practitioners and Technical Occupations (29-0000) | Paradiso et al., 2020 <sup>164</sup> | n=606  | Registered Nurses | Cross sectional study with prospective cohort follow up of a subset of the sample | 03/26 - 04/17 | Italy                      | 0.33%            | High     |
| Healthcare Practitioners and Technical Occupations (29-0000) | Plebani et al., 2020 <sup>146</sup>  | n=3230 | Registered Nurses | Cross-sectional survey                                                            | 02/22 - 05/29 | Italy                      | 4.7% (4-5.5%)    | High     |
| Healthcare Practitioners and Technical Occupations (29-0000) | Poustchi et al., 2020 <sup>28</sup>  | n=1245 | Registered Nurses | Cross-sectional survey                                                            | 04/17 - 06/02 | Iran (Islamic Republic of) | 15.9% (13.9-18%) | Moderate |
| Healthcare Practitioners and Technical                       | Rudberg et al., 2020 <sup>147</sup>  | n=636  | Registered Nurses | Cross-sectional survey                                                            | 04/14 - 05/08 | Sweden                     | 21.9%            | Moderate |

|                                                              |                                      |        |                   |                        |               |                          |                  |          |
|--------------------------------------------------------------|--------------------------------------|--------|-------------------|------------------------|---------------|--------------------------|------------------|----------|
| Occupations (29-0000)                                        |                                      |        |                   |                        |               |                          |                  |          |
| Healthcare Practitioners and Technical Occupations (29-0000) | Schmidt et al., 2020 <sup>148</sup>  | n=154  | Registered Nurses | Cross-sectional survey | 04/20 - 04/30 | Germany                  | 0%               | High     |
| Healthcare Practitioners and Technical Occupations (29-0000) | Self et al., 2020 <sup>154</sup>     | n=1445 | Registered Nurses | Cross-sectional survey | 04/03 - 06/19 | United States of America | 5.05%            | Moderate |
| Healthcare Practitioners and Technical Occupations (29-0000) | Siddiqui et al., 2020 <sup>2</sup>   | n=59   | Registered Nurses | Prospective cohort     | 04/15 - 08/15 | India                    | 10.2%            | High     |
| Healthcare Practitioners and Technical Occupations (29-0000) | Siddiqui et al., 2020 <sup>2</sup>   | n=70   | Registered Nurses | Prospective cohort     | 04/15 - 08/15 | India                    | 10%              | High     |
| Healthcare Practitioners and Technical Occupations (29-0000) | Sotgiu et al., 2020 <sup>149</sup>   | n=64   | Registered Nurses | Cross-sectional survey | 04/02 - 04/16 | Italy                    | 7.8% (1.2-14.4%) | High     |
| Healthcare Practitioners and Technical Occupations (29-0000) | Sydney et al., 2020 <sup>165</sup>   | n=81   | Registered Nurses | Cross-sectional survey | 04/28 - 05/04 | United States of America | 18.52%           | High     |
| Healthcare Practitioners and Technical Occupations (29-0000) | Urbietta et al., 2020 <sup>132</sup> | n=83   | Registered Nurses | Cross-sectional survey | 04/14 - 04/16 | Spain                    | 4.8%             | High     |



|                                                    |                                                              |                                       |        |                                      |                        |               |                          |                 |          |
|----------------------------------------------------|--------------------------------------------------------------|---------------------------------------|--------|--------------------------------------|------------------------|---------------|--------------------------|-----------------|----------|
| 1<br>2<br>3<br>4<br>5<br>6<br>7                    | Healthcare Practitioners and Technical Occupations (29-0000) | Urbietta et al., 2020 <sup>132</sup>  | n=23   | Registered Nurses                    | Cross-sectional survey | 04/14 - 04/16 | Spain                    | 8.7%            | High     |
| 8<br>9<br>10<br>11<br>12                           | Healthcare Practitioners and Technical Occupations (29-0000) | Venugopal et al., 2020 <sup>150</sup> | n=142  | Registered Nurses                    | Cross-sectional survey | 03/01 - 05/01 | United States of America | 28%             | Moderate |
| 13<br>14<br>15<br>16<br>17<br>18                   | Healthcare Practitioners and Technical Occupations (29-0000) | Yogo et al., 2020 <sup>36</sup>       | n=1129 | Registered Nurses                    | Cross-sectional survey | 05/20 - 06/08 | United States of America | 2.48%           | High     |
| 19<br>20<br>21<br>22<br>23                         | Healthcare Practitioners and Technical Occupations (29-0000) | Yogo et al., 2020 <sup>36</sup>       | n=12   | Registered Nurses                    | Cross-sectional survey | 05/20 - 06/08 | United States of America | 0%              | High     |
| 24<br>25<br>26<br>27<br>28                         | Healthcare Practitioners and Technical Occupations (29-0000) | Zhou et al., 2020 <sup>166</sup>      | n=2406 | Registered Nurses                    | Cross-sectional survey | 03/16 - 03/25 | China                    | 1.37%           | Moderate |
| 29<br>30<br>31<br>32<br>33                         | Healthcare Practitioners and Technical Occupations (29-0000) | Godbout et al., 2020 <sup>138</sup>   | n=141  | Nurse Practitioners                  | Cross-sectional survey | 07/27 - 10/02 | United States of America | 1.42%           | High     |
| 34<br>35<br>36<br>37<br>38                         | Healthcare Practitioners and Technical Occupations (29-0000) | Dimcheff et al., 2020 <sup>157</sup>  | n=214  | Nurse Practitioners                  | Cross-sectional survey | 06/08 - 07/08 | United States of America | 3.7%            | Moderate |
| 39<br>40<br>41<br>42<br>43<br>44<br>45<br>46<br>47 | Healthcare Practitioners and                                 | Akinbami et al., 2020 <sup>46</sup>   | n=719  | Health Technologists and Technicians | Cross-sectional survey | 05/18 - 06/13 | United States of America | 4.2% (2.8-5.9%) | Moderate |

|                                                              |                                     |       |                                                   |                        |               |                          |                 |          |
|--------------------------------------------------------------|-------------------------------------|-------|---------------------------------------------------|------------------------|---------------|--------------------------|-----------------|----------|
| Technical Occupations (29-0000)                              |                                     |       |                                                   |                        |               |                          |                 |          |
| Healthcare Practitioners and Technical Occupations (29-0000) | Blairon et al., 2020 <sup>52</sup>  | n=61  | Health Technologists and Technicians              | Cross-sectional survey | 05/25 - 06/19 | Belgium                  | 6.6%            | High     |
| Healthcare Practitioners and Technical Occupations (29-0000) | Yogo et al., 2020 <sup>36</sup>     | n=65  | Health Technologists and Technicians              | Cross-sectional survey | 05/20 - 06/08 | United States of America | 4.62%           | High     |
| Healthcare Practitioners and Technical Occupations (29-0000) | Silva et al., 2020 <sup>34</sup>    | n=224 | Clinical Laboratory Technologists and Technicians | Cross-sectional survey | 06/05 - 07/31 | Brazil                   | 7.59%           | High     |
| Healthcare Practitioners and Technical Occupations (29-0000) | Costa et al., 2020 <sup>128</sup>   | n=66  | Medical and Clinical Laboratory Technologists     | Cross-sectional survey | 05/14 - 05/28 | Brazil                   | 3%              | Moderate |
| Healthcare Practitioners and Technical Occupations (29-0000) | Akinbami et al., 2020 <sup>46</sup> | n=293 | Medical and Clinical Laboratory Technicians       | Cross-sectional survey | 05/18 - 06/13 | United States of America | 3.4% (1.7-6.2%) | Moderate |
| Healthcare Practitioners and Technical Occupations (29-0000) | Akinbami et al., 2020 <sup>46</sup> | n=365 | Medical and Clinical Laboratory Technicians       | Cross-sectional survey | 05/18 - 06/13 | United States of America | 5.5% (3.4-8.3%) | Moderate |
| Healthcare Practitioners and Technical                       | Alharbi et al., 2020 <sup>125</sup> | n=80  | Medical and Clinical Laboratory Technicians       | Cross-sectional survey | 04/18 - 06/17 | Saudi Arabia             | 20%             | High     |

|                                                              |                                      |       |                                             |                                                                                   |               |          |        |          |
|--------------------------------------------------------------|--------------------------------------|-------|---------------------------------------------|-----------------------------------------------------------------------------------|---------------|----------|--------|----------|
| Occupations (29-0000)                                        |                                      |       |                                             |                                                                                   |               |          |        |          |
| Healthcare Practitioners and Technical Occupations (29-0000) | Baracco et al., 2020 <sup>24</sup>   | n=256 | Medical and Clinical Laboratory Technicians | Cross-sectional survey                                                            | 04/23 - 05/05 | Italy    | 12.1%  | High     |
| Healthcare Practitioners and Technical Occupations (29-0000) | Brehm et al., 2020 <sup>7</sup>      | n=105 | Medical and Clinical Laboratory Technicians | Cross sectional study with prospective cohort follow up of a subset of the sample | 03/20 - 07/17 | Germany  | 0%     | Moderate |
| Healthcare Practitioners and Technical Occupations (29-0000) | Calcagno et al., 2020 <sup>124</sup> | n=216 | Medical and Clinical Laboratory Technicians | Cross-sectional survey                                                            | 04/17 - 05/20 | Italy    | 6.94%  | Moderate |
| Healthcare Practitioners and Technical Occupations (29-0000) | Calcagno et al., 2020 <sup>124</sup> | n=157 | Medical and Clinical Laboratory Technicians | Cross-sectional survey                                                            | 04/17 - 05/20 | Italy    | 11.46% | Moderate |
| Healthcare Practitioners and Technical Occupations (29-0000) | Chau et al., 2020 <sup>126</sup>     | n=33  | Medical and Clinical Laboratory Technicians | Cross-sectional survey                                                            | 08/23 - 08/30 | Viet Nam | 0%     | High     |
| Healthcare Practitioners and Technical Occupations (29-0000) | Galan et al., 2020 <sup>20</sup>     | n=192 | Medical and Clinical Laboratory Technicians | Cross-sectional survey                                                            | 04/14 - 04/27 | Spain    | 21.35% | High     |
| Healthcare Practitioners and Technical                       | Goenka et al., 2020 <sup>25</sup>    | n=72  | Medical and Clinical Laboratory Technicians | Cross-sectional survey                                                            | 07/12 - 08/23 | India    | 15.28% | Moderate |

|                                                              |                                    |        |                                             |                        |               |                          |                  |          |
|--------------------------------------------------------------|------------------------------------|--------|---------------------------------------------|------------------------|---------------|--------------------------|------------------|----------|
| Occupations (29-0000)                                        |                                    |        |                                             |                        |               |                          |                  |          |
| Healthcare Practitioners and Technical Occupations (29-0000) | Haq et al., 2020 <sup>67</sup>     | n=32   | Medical and Clinical Laboratory Technicians | Cross-sectional survey | 06/15 - 06/29 | Pakistan                 | 50% (31.8-68.1%) | Moderate |
| Healthcare Practitioners and Technical Occupations (29-0000) | Iversen et al., 2020 <sup>8</sup>  | n=1292 | Medical and Clinical Laboratory Technicians | Cross-sectional survey | 04/15 - 04/22 | Denmark                  | 1.93%            | Low      |
| Healthcare Practitioners and Technical Occupations (29-0000) | Khan et al., 2020 <sup>127</sup>   | n=397  | Medical and Clinical Laboratory Technicians | Cross-sectional survey | 06/15 - 06/29 | India                    | 2.5% (1.4-4.6%)  | Moderate |
| Healthcare Practitioners and Technical Occupations (29-0000) | Lumley et al., 2020 <sup>9</sup>   | n=452  | Medical and Clinical Laboratory Technicians | Prospective cohort     | 04/23 - 11/30 | The United Kingdom       | 8.63%            | Moderate |
| Healthcare Practitioners and Technical Occupations (29-0000) | Nishida et al., 2020 <sup>90</sup> | n=140  | Medical and Clinical Laboratory Technicians | Cross-sectional survey | 06/12 - 06/19 | Japan                    | 0%               | Moderate |
| Healthcare Practitioners and Technical Occupations (29-0000) | Rosser et al., 2020 <sup>33</sup>  | n=225  | Medical and Clinical Laboratory Technicians | Cross-sectional survey | 04/20 - 05/20 | United States of America | 0.44%            | High     |
| Healthcare Practitioners and Technical Occupations (29-0000) | Iversen et al., 2020 <sup>8</sup>  | n=342  | Radiologic Technologists                    | Cross-sectional survey | 04/15 - 04/22 | Denmark                  | 3.51%            | Low      |

|                                                              |                                     |        |                                              |                        |               |                          |                  |          |
|--------------------------------------------------------------|-------------------------------------|--------|----------------------------------------------|------------------------|---------------|--------------------------|------------------|----------|
| Healthcare Practitioners and Technical Occupations (29-0000) | Martin et al., 2020 <sup>23</sup>   | n=241  | Radiologic Technologists                     | Cross-sectional survey | 05/29 - 07/13 | The United Kingdom       | 9.96%            | Moderate |
| Healthcare Practitioners and Technical Occupations (29-0000) | Akinbami et al., 2020 <sup>46</sup> | n=1158 | Emergency Medical Technicians and Paramedics | Cross-sectional survey | 05/18 - 06/13 | United States of America | 5.2% (4-6.6%)    | Moderate |
| Healthcare Practitioners and Technical Occupations (29-0000) | Buntinx et al., 2020 <sup>167</sup> | n=10   | Emergency Medical Technicians and Paramedics | Cross-sectional survey | 04/14 - 04/16 | Belgium                  | 10%              | High     |
| Healthcare Practitioners and Technical Occupations (29-0000) | Haq et al., 2020 <sup>67</sup>      | n=157  | Emergency Medical Technicians and Paramedics | Cross-sectional survey | 06/15 - 06/29 | Pakistan                 | 42% (34.2-50.1%) | Moderate |
| Healthcare Practitioners and Technical Occupations (29-0000) | Iversen et al., 2020 <sup>8</sup>   | n=323  | Emergency Medical Technicians and Paramedics | Cross-sectional survey | 04/15 - 04/22 | Denmark                  | 4.95%            | Low      |
| Healthcare Practitioners and Technical Occupations (29-0000) | Mesnil et al., 2020 <sup>143</sup>  | n=212  | Emergency Medical Technicians and Paramedics | Cross-sectional survey | 06/08 - 06/22 | France                   | 11%              | High     |
| Healthcare Practitioners and Technical Occupations (29-0000) | Reuben et al., 2020 <sup>168</sup>  | n=10   | Emergency Medical Technicians and Paramedics | Cross-sectional survey | 05/28 - 07/15 | United States of America | 0%               | High     |

|                                                              |                                       |       |                                                 |                        |               |                            |        |          |
|--------------------------------------------------------------|---------------------------------------|-------|-------------------------------------------------|------------------------|---------------|----------------------------|--------|----------|
| Healthcare Practitioners and Technical Occupations (29-0000) | Saberian et al., 2020 <sup>169</sup>  | n=243 | Emergency Medical Technicians and Paramedics    | Cross-sectional survey | 03/20 - 05/20 | Iran (Islamic Republic of) | 41.56% | High     |
| Healthcare Practitioners and Technical Occupations (29-0000) | Self et al., 2020 <sup>154</sup>      | n=56  | Emergency Medical Technicians and Paramedics    | Cross-sectional survey | 04/03 - 06/19 | United States of America   | 5.36%  | Moderate |
| Healthcare Practitioners and Technical Occupations (29-0000) | Tarabichi et al., 2020 <sup>170</sup> | n=111 | Emergency Medical Technicians and Paramedics    | Cross-sectional survey | 04/20 - 05/19 | United States of America   | 5.41%  | High     |
| Healthcare Practitioners and Technical Occupations (29-0000) | Baracco et al., 2020 <sup>24</sup>    | n=188 | Health Technologists and Technicians, All Other | Cross-sectional survey | 04/23 - 05/05 | Italy                      | 13.8%  | High     |
| Healthcare Practitioners and Technical Occupations (29-0000) | Chau et al., 2020 <sup>126</sup>      | n=22  | Health Technologists and Technicians, All Other | Cross-sectional survey | 08/23 - 08/30 | Viet Nam                   | 0%     | High     |
| Healthcare Practitioners and Technical Occupations (29-0000) | Goenka et al., 2020 <sup>25</sup>     | n=99  | Health Technologists and Technicians, All Other | Cross-sectional survey | 07/12 - 08/23 | India                      | 12.12% | Moderate |
| Healthcare Practitioners and Technical Occupations (29-0000) | Goenka et al., 2020 <sup>26</sup>     | n=16  | Health Technologists and Technicians, All Other | Cross-sectional survey | 08/01 - 08/31 | India                      | 68.75% | High     |
| Healthcare Support                                           | Jeremias et al., 2020 <sup>70</sup>   | n=155 | Healthcare Support Occupations                  | Cross-sectional survey | 03/01 - 04/30 | United States of America   | 5.8%   | High     |

|                                          |                                          |       |                                             |                        |               |                          |                      |          |
|------------------------------------------|------------------------------------------|-------|---------------------------------------------|------------------------|---------------|--------------------------|----------------------|----------|
| Occupations (31-0000)                    |                                          |       |                                             |                        |               |                          |                      |          |
| Healthcare Support Occupations (31-0000) | Ward et al., 2020 <sup>113</sup>         | n=979 | Nursing, Psychiatric, and Home Health Aides | Cross-sectional survey | 09/15 - 09/28 | The United Kingdom       | 11.09% (8.96-13.59%) | Moderate |
| Healthcare Support Occupations (31-0000) | Ward et al., 2020 <sup>113</sup>         | n=257 | Nursing, Psychiatric, and Home Health Aides | Cross-sectional survey | 09/15 - 09/28 | The United Kingdom       | 8.95%                | Moderate |
| Healthcare Support Occupations (31-0000) | Vijh et al., 2020 <sup>171</sup>         | n=169 | Nursing, Psychiatric, and Home Health Aides | Cross-sectional survey | 05/04 - 05/14 | Canada                   | 26.63%               | High     |
| Healthcare Support Occupations (31-0000) | Akinbami et al., 2020 <sup>46</sup>      | n=641 | Nursing Assistants                          | Cross-sectional survey | 05/18 - 06/13 | United States of America | 12.8% (10.3-15.6%)   | Moderate |
| Healthcare Support Occupations (31-0000) | Bampoe et al., 2020 <sup>156</sup>       | n=108 | Nursing Assistants                          | Cross-sectional survey | 05/11 - 06/05 | The United Kingdom       | 15.7% (9.5-24%)      | High     |
| Healthcare Support Occupations (31-0000) | Baracco et al., 2020 <sup>24</sup>       | n=257 | Nursing Assistants                          | Cross-sectional survey | 04/23 - 05/05 | Italy                    | 22.2%                | High     |
| Healthcare Support Occupations (31-0000) | Barallat et al., 2020 <sup>50</sup>      | n=832 | Nursing Assistants                          | Cross-sectional survey | 05/04 - 05/22 | Spain                    | 13.94%               | High     |
| Healthcare Support Occupations (31-0000) | Bhattacharya et al., 2020 <sup>172</sup> | n=121 | Nursing Assistants                          | Cross-sectional survey | 06/01 - 06/15 | United States of America | 1.65%                | High     |
| Healthcare Support                       | Brousseau et al., 2020 <sup>134</sup>    | n=132 | Nursing Assistants                          | Cross-sectional survey | 07/06 - 09/24 | Canada                   | 16.7%                | High     |

|                                          |                                      |        |                    |                        |               |                          |        |          |
|------------------------------------------|--------------------------------------|--------|--------------------|------------------------|---------------|--------------------------|--------|----------|
| Occupations (31-0000)                    |                                      |        |                    |                        |               |                          |        |          |
| Healthcare Support Occupations (31-0000) | Brunner et al., 2020 <sup>54</sup>   | n=95   | Nursing Assistants | Cross-sectional survey | 05/04 - 05/29 | United States of America | 1.05%  | High     |
| Healthcare Support Occupations (31-0000) | Brzostek et al., 2020 <sup>151</sup> | n=570  | Nursing Assistants | Cross-sectional survey | 04/17 - 05/07 | United States of America | 39.5%  | Moderate |
| Healthcare Support Occupations (31-0000) | Brzostek et al., 2020 <sup>151</sup> | n=263  | Nursing Assistants | Cross-sectional survey | 04/17 - 05/07 | United States of America | 45.6%  | Moderate |
| Healthcare Support Occupations (31-0000) | Calcagno et al., 2020 <sup>124</sup> | n=476  | Nursing Assistants | Cross-sectional survey | 04/17 - 05/20 | Italy                    | 9.24%  | Moderate |
| Healthcare Support Occupations (31-0000) | Costa et al., 2020 <sup>128</sup>    | n=553  | Nursing Assistants | Cross-sectional survey | 05/14 - 05/28 | Brazil                   | 10.5%  | Moderate |
| Healthcare Support Occupations (31-0000) | Galan et al., 2020 <sup>20</sup>     | n=472  | Nursing Assistants | Cross-sectional survey | 04/14 - 04/27 | Spain                    | 33.26% | High     |
| Healthcare Support Occupations (31-0000) | Garcia et al., 2020 <sup>173</sup>   | n=2424 | Nursing Assistants | Cross-sectional survey | 05/01 - 05/30 | Spain                    | 22.4%  | High     |
| Healthcare Support Occupations (31-0000) | Garcia et al., 2020 <sup>174</sup>   | n=2424 | Nursing Assistants | Cross-sectional survey | 05/01 - 05/30 | Spain                    | 22.4%  | High     |
| Healthcare Support                       | Hanrath et al., 2020 <sup>32</sup>   | n=1434 | Nursing Assistants | Cross-sectional survey | 05/29 - 07/06 | The United Kingdom       | 11.44% | High     |



|                                          |                                       |        |                    |                        |               |                          |               |          |
|------------------------------------------|---------------------------------------|--------|--------------------|------------------------|---------------|--------------------------|---------------|----------|
| Occupations (31-0000)                    |                                       |        |                    |                        |               |                          |               |          |
| Healthcare Support Occupations (31-0000) | Iversen et al., 2020 <sup>8</sup>     | n=501  | Nursing Assistants | Cross-sectional survey | 04/15 - 04/22 | Denmark                  | 1.2%          | Low      |
| Healthcare Support Occupations (31-0000) | Khan et al., 2020 <sup>127</sup>      | n=624  | Nursing Assistants | Cross-sectional survey | 06/15 - 06/29 | India                    | 2.4% (1.5-4%) | Moderate |
| Healthcare Support Occupations (31-0000) | Mughal et al., 2020 <sup>175</sup>    | n=121  | Nursing Assistants | Cross-sectional survey | 05/14 - 05/19 | United States of America | 0.83%         | High     |
| Healthcare Support Occupations (31-0000) | Rao et al., 2020 <sup>176</sup>       | n=1000 | Nursing Assistants | Cross-sectional survey | 05/23 - 06/06 | India                    | 1%            | Unclear  |
| Healthcare Support Occupations (31-0000) | Rudberg et al., 2020 <sup>147</sup>   | n=428  | Nursing Assistants | Cross-sectional survey | 04/14 - 05/08 | Sweden                   | 25.5%         | Moderate |
| Healthcare Support Occupations (31-0000) | Siddiqui et al., 2020 <sup>2</sup>    | n=28   | Nursing Assistants | Prospective cohort     | 04/15 - 08/15 | India                    | 10.7%         | High     |
| Healthcare Support Occupations (31-0000) | Yogo et al., 2020 <sup>36</sup>       | n=154  | Nursing Assistants | Cross-sectional survey | 05/20 - 06/08 | United States of America | 3.24%         | High     |
| Healthcare Support Occupations (31-0000) | Brousseau et al., 2020 <sup>134</sup> | n=201  | Orderlies          | Cross-sectional survey | 07/06 - 09/24 | Canada                   | 17.9%         | High     |
| Healthcare Support                       | Kassem et al., 2020 <sup>72</sup>     | n=9    | Orderlies          | Cross-sectional survey | 06/01 - 06/14 | Egypt                    | 0%            | High     |

|                                          |                                    |        |                                       |                        |               |                          |        |          |
|------------------------------------------|------------------------------------|--------|---------------------------------------|------------------------|---------------|--------------------------|--------|----------|
| Occupations (31-0000)                    |                                    |        |                                       |                        |               |                          |        |          |
| Healthcare Support Occupations (31-0000) | Kassem et al., 2020 <sup>72</sup>  | n=9    | Orderlies                             | Cross-sectional survey | 06/01 - 06/14 | Egypt                    | 33.33% | High     |
| Healthcare Support Occupations (31-0000) | Kassem et al., 2020 <sup>72</sup>  | n=9    | Orderlies                             | Cross-sectional survey | 06/01 - 06/14 | Egypt                    | 11.11% | High     |
| Healthcare Support Occupations (31-0000) | Kassem et al., 2020 <sup>72</sup>  | n=9    | Orderlies                             | Cross-sectional survey | 06/01 - 06/14 | Egypt                    | 22.22% | High     |
| Healthcare Support Occupations (31-0000) | Hanrath et al., 2020 <sup>32</sup> | n=122  | Orderlies                             | Cross-sectional survey | 05/29 - 07/06 | The United Kingdom       | 9.02%  | High     |
| Healthcare Support Occupations (31-0000) | Lumley et al., 2020 <sup>9</sup>   | n=377  | Orderlies                             | Prospective cohort     | 04/23 - 11/30 | The United Kingdom       | 15.38% | Moderate |
| Healthcare Support Occupations (31-0000) | Rosser et al., 2020 <sup>33</sup>  | n=3959 | Medical Assistants                    | Cross-sectional survey | 04/20 - 05/20 | United States of America | 1.39%  | High     |
| Healthcare Support Occupations (31-0000) | Yogo et al., 2020 <sup>36</sup>    | n=106  | Phlebotomists                         | Cross-sectional survey | 05/20 - 06/08 | United States of America | 0%     | High     |
| Healthcare Support Occupations (31-0000) | Cavlek et al., 2020 <sup>56</sup>  | n=300  | Healthcare Support Workers, All Other | Cross-sectional survey | 04/25 - 05/24 | Croatia                  | 0.67%  | High     |
| Healthcare Support                       | Erber et al., 2020 <sup>31</sup>   | n=383  | Healthcare Support Workers, All Other | Cross-sectional survey | 04/14 - 05/29 | Germany                  | 2.34%  | High     |

|                                          |                                       |        |                                                                |                        |               |                          |                 |          |
|------------------------------------------|---------------------------------------|--------|----------------------------------------------------------------|------------------------|---------------|--------------------------|-----------------|----------|
| Occupations (31-0000)                    |                                       |        |                                                                |                        |               |                          |                 |          |
| Healthcare Support Occupations (31-0000) | Khan et al., 2020 <sup>127</sup>      | n=141  | Healthcare Support Workers, All Other                          | Cross-sectional survey | 06/15 - 06/29 | India                    | 0%              | Moderate |
| Protective Service Occupations (33-0000) | Shukla et al., 2020 <sup>177</sup>    | n=1713 | Protective Service Occupations                                 | Cross-sectional survey | 04/24 - 05/21 | United States of America | 1.46%           | Moderate |
| Protective Service Occupations (33-0000) | Martinez et al., 2020 <sup>121</sup>  | n=18   | First-Line Supervisors of Fire Fighting and Prevention Workers | Cross-sectional survey | 04/16 - 04/17 | United States of America | 0%              | High     |
| Protective Service Occupations (33-0000) | Martinez et al., 2020 <sup>121</sup>  | n=47   | First-Line Supervisors of Fire Fighting and Prevention Workers | Cross-sectional survey | 04/16 - 04/17 | United States of America | 14.89%          | High     |
| Protective Service Occupations (33-0000) | Martinez et al., 2020 <sup>121</sup>  | n=13   | First-Line Supervisors of Fire Fighting and Prevention Workers | Cross-sectional survey | 04/16 - 04/17 | United States of America | 7.69%           | High     |
| Protective Service Occupations (33-0000) | Akinbami et al., 2020 <sup>46</sup>   | n=330  | Firefighters                                                   | Cross-sectional survey | 05/18 - 06/13 | United States of America | 6.7% (4.2-9.9%) | Moderate |
| Protective Service Occupations (33-0000) | Gray et al., 2020 <sup>178</sup>      | n=132  | Firefighters                                                   | Cross-sectional survey | 05/01 - 05/31 | United States of America | 14%             | High     |
| Protective Service Occupations (33-0000) | Reuben et al., 2020 <sup>168</sup>    | n=62   | Firefighters                                                   | Cross-sectional survey | 05/28 - 07/15 | United States of America | 4.84%           | High     |
| Protective Service Occupations (33-0000) | Sabourin et al., 2020 <sup>35</sup>   | n=42   | Firefighters                                                   | Cross-sectional survey | 07/15 - 08/15 | United States of America | 2.38%           | High     |
| Protective Service Occupations (33-0000) | Tarabichi et al., 2020 <sup>170</sup> | n=185  | Firefighters                                                   | Cross-sectional survey | 04/20 - 05/19 | United States of America | 5.41%           | High     |

|                                          |                                      |        |                                      |                        |               |                          |               |          |
|------------------------------------------|--------------------------------------|--------|--------------------------------------|------------------------|---------------|--------------------------|---------------|----------|
| Protective Service Occupations (33-0000) | Martinez et al., 2020 <sup>121</sup> | n=7    | Fire Inspectors and Investigators    | Cross-sectional survey | 04/16 - 04/17 | United States of America | 14.29%        | High     |
| Protective Service Occupations (33-0000) | Akinbami et al., 2020 <sup>46</sup>  | n=785  | Police and Sheriff's Patrol Officers | Cross-sectional survey | 05/18 - 06/13 | United States of America | 4% (2.7-5.6%) | Moderate |
| Protective Service Occupations (33-0000) | Chughtai et al., 2020 <sup>179</sup> | n=154  | Police and Sheriff's Patrol Officers | Cross-sectional survey | 05/20 - 05/30 | Pakistan                 | 15.6%         | High     |
| Protective Service Occupations (33-0000) | Gudo et al., 2020 <sup>65</sup>      | n=564  | Police and Sheriff's Patrol Officers | Cross-sectional survey | 06/17 - 06/30 | Mozambique               | 6% (4-8%)     | High     |
| Protective Service Occupations (33-0000) | Gujski et al., 2020 <sup>180</sup>   | n=4026 | Police and Sheriff's Patrol Officers | Cross-sectional survey | 06/22 - 07/08 | Poland                   | 4.2%          | Moderate |
| Protective Service Occupations (33-0000) | Halatoko et al., 2020 <sup>41</sup>  | n=196  | Police and Sheriff's Patrol Officers | Cross-sectional survey | 04/23 - 05/08 | Togo                     | 0%            | High     |
| Protective Service Occupations (33-0000) | Langa et al., 2020 <sup>181</sup>    | n=471  | Police and Sheriff's Patrol Officers | Cross-sectional survey | 09/28 - 10/09 | Mozambique               | 1.5%          | High     |
| Protective Service Occupations (33-0000) | Macicame et al., 2020 <sup>182</sup> | n=456  | Police and Sheriff's Patrol Officers | Cross-sectional survey | 09/14 - 09/30 | Mozambique               | 4.39%         | High     |
| Protective Service Occupations (33-0000) | Mahomed et al., 2020 <sup>81</sup>   | n=554  | Police and Sheriff's Patrol Officers | Cross-sectional survey | 08/31 - 10/12 | Mozambique               | 2.9%          | High     |
| Protective Service Occupations (33-0000) | Reuben et al., 2020 <sup>168</sup>   | n=220  | Police and Sheriff's Patrol Officers | Cross-sectional survey | 05/28 - 07/15 | United States of America | 3.64%         | High     |
| Protective Service Occupations (33-0000) | Sabourin et al., 2020 <sup>35</sup>  | n=125  | Police and Sheriff's Patrol Officers | Cross-sectional survey | 07/15 - 08/15 | United States of America | 4%            | High     |

|                                                            |                                     |         |                                                  |                        |               |                          |       |          |
|------------------------------------------------------------|-------------------------------------|---------|--------------------------------------------------|------------------------|---------------|--------------------------|-------|----------|
| Protective Service Occupations (33-0000)                   | Shukla et al., 2020 <sup>177</sup>  | n=1643  | Police and Sheriff's Patrol Officers             | Cross-sectional survey | 04/24 - 05/21 | United States of America | 1.52% | Moderate |
| Protective Service Occupations (33-0000)                   | Siddiqui et al., 2020 <sup>2</sup>  | n=27    | Police and Sheriff's Patrol Officers             | Prospective cohort     | 04/15 - 08/15 | India                    | 7.4%  | High     |
| Protective Service Occupations (33-0000)                   | Viegas et al., 2020 <sup>110</sup>  | n=559   | Police and Sheriff's Patrol Officers             | Cross-sectional survey | 08/03 - 08/21 | Mozambique               | 3.94% | High     |
| Protective Service Occupations (33-0000)                   | Denyer et al., 2020 <sup>60</sup>   | n=38216 | Security Guards                                  | Cross-sectional survey | 05/12 - 05/18 | Japan                    | 0.23% | Unclear  |
| Protective Service Occupations (33-0000)                   | Mahumane et al., 2020 <sup>82</sup> | n=407   | Security Guards                                  | Cross-sectional survey | 11/02 - 11/17 | Mozambique               | 4.9%  | High     |
| Protective Service Occupations (33-0000)                   | Siddiqui et al., 2020 <sup>2</sup>  | n=9     | Security Guards                                  | Prospective cohort     | 04/15 - 08/15 | India                    | 0%    | High     |
| Protective Service Occupations (33-0000)                   | Silva et al., 2020 <sup>34</sup>    | n=32    | Security Guards                                  | Cross-sectional survey | 06/05 - 07/31 | Brazil                   | 34%   | High     |
| Protective Service Occupations (33-0000)                   | Thani et al., 2020 <sup>183</sup>   | n=61    | Security Guards                                  | Cross-sectional survey | 07/26 - 09/09 | Qatar                    | 60.1% | Moderate |
| Food Preparation and Serving Related Occupations (35-0000) | Thani et al., 2020 <sup>183</sup>   | n=93    | Food Preparation and Serving Related Occupations | Cross-sectional survey | 07/26 - 09/09 | Qatar                    | 29.2% | Moderate |
| Food Preparation and Serving Related Occupations (35-0000) | Siddiqui et al., 2020 <sup>2</sup>  | n=8     | Cooks, All Other                                 | Prospective cohort     | 04/15 - 08/15 | India                    | 37.5% | High     |
| Food Preparation and Serving                               | Brunner et al., 2020 <sup>54</sup>  | n=8     | Food Preparation Workers                         | Cross-sectional survey | 05/04 - 05/29 | United States of America | 0%    | High     |

|   |                                                                     |                                       |       |                                                           |                                                                                   |               |                          |       |          |
|---|---------------------------------------------------------------------|---------------------------------------|-------|-----------------------------------------------------------|-----------------------------------------------------------------------------------|---------------|--------------------------|-------|----------|
| 1 | Related Occupations (35-0000)                                       |                                       |       |                                                           |                                                                                   |               |                          |       |          |
| 2 | Healthcare Support Occupations (31-0000)                            | Rosser et al., 2020 <sup>33</sup>     | n=335 | Healthcare Support Occupations                            | Cross-sectional survey                                                            | 04/20 - 05/20 | United States of America | 3.58% | High     |
| 3 | Food Preparation and Serving Related Occupations (35-0000)          | Biggs et al., 2020 <sup>3</sup>       | n=24  | Food Servers, Nonrestaurant                               | Cross-sectional survey                                                            | 04/28 - 05/03 | United States of America | 4.17% | Moderate |
| 4 | Food Preparation and Serving Related Occupations (35-0000)          | Leidner et al., 2020 <sup>22</sup>    | n=113 | Food Servers, Nonrestaurant                               | Cross sectional study with prospective cohort follow up of a subset of the sample | 04/08 - 05/22 | United States of America | 1.77% | High     |
| 5 | Food Preparation and Serving Related Occupations (35-0000)          | Hanrath et al., 2020 <sup>32</sup>    | n=340 | Other Food Preparation and Serving Related Workers        | Cross-sectional survey                                                            | 05/29 - 07/06 | The United Kingdom       | 8.53% | High     |
| 6 | Building and Grounds Cleaning and Maintenance Occupations (37-0000) | Martin et al., 2020 <sup>23</sup>     | n=528 | Building and Grounds Cleaning and Maintenance Occupations | Cross-sectional survey                                                            | 05/29 - 07/13 | The United Kingdom       | 8.14% | Moderate |
| 7 | Building and Grounds Cleaning and Maintenance Occupations (37-0000) | Brousseau et al., 2020 <sup>134</sup> | n=102 | Building Cleaning and Pest Control Workers                | Cross-sectional survey                                                            | 07/06 - 09/24 | Canada                   | 10.8% | High     |
| 8 | Building and Grounds Cleaning and Maintenance Occupations (37-0000) | Chau et al., 2020 <sup>126</sup>      | n=42  | Building Cleaning and Pest Control Workers                | Cross-sectional survey                                                            | 08/23 - 08/30 | Viet Nam                 | 0%    | High     |

|                                                                     |                                          |       |                                                               |                        |               |                          |        |          |
|---------------------------------------------------------------------|------------------------------------------|-------|---------------------------------------------------------------|------------------------|---------------|--------------------------|--------|----------|
| Occupations (37-0000)                                               |                                          |       |                                                               |                        |               |                          |        |          |
| Building and Grounds Cleaning and Maintenance Occupations (37-0000) | Finkenzeller et al., 2020 <sup>158</sup> | n=57  | Building Cleaning and Pest Control Workers                    | Prospective cohort     | 06/29 - 07/29 | Germany                  | 19.3%  | Moderate |
| Building and Grounds Cleaning and Maintenance Occupations (37-0000) | Chau et al., 2020 <sup>126</sup>         | n=6   | Janitors and Cleaners, Except Maids and Housekeeping Cleaners | Cross-sectional survey | 08/23 - 08/30 | Viet Nam                 | 0%     | High     |
| Building and Grounds Cleaning and Maintenance Occupations (37-0000) | Epstude et al., 2020 <sup>184</sup>      | n=45  | Janitors and Cleaners, Except Maids and Housekeeping Cleaners | Cross-sectional survey | 06/15 - 06/30 | Germany                  | 0%     | High     |
| Building and Grounds Cleaning and Maintenance Occupations (37-0000) | Thani et al., 2020 <sup>183</sup>        | n=105 | Janitors and Cleaners, Except Maids and Housekeeping Cleaners | Cross-sectional survey | 07/26 - 09/09 | Qatar                    | 54.5%  | Moderate |
| Building and Grounds Cleaning and Maintenance Occupations (37-0000) | Brunner et al., 2020 <sup>54</sup>       | n=23  | Maids and Housekeeping Cleaners                               | Cross-sectional survey | 05/04 - 05/29 | United States of America | 0%     | High     |
| Building and Grounds Cleaning and Maintenance Occupations (37-0000) | Goenka et al., 2020 <sup>25</sup>        | n=226 | Maids and Housekeeping Cleaners                               | Cross-sectional survey | 07/12 - 08/23 | India                    | 26.11% | Moderate |
| Building and Grounds Cleaning and Maintenance Occupations (37-0000) | Goenka et al., 2020 <sup>26</sup>        | n=10  | Maids and Housekeeping Cleaners                               | Cross-sectional survey | 08/01 - 08/31 | India                    | 10%    | High     |

|                                        |                                                                     |                                    |        |                                 |                                                                                   |               |                            |                  |          |
|----------------------------------------|---------------------------------------------------------------------|------------------------------------|--------|---------------------------------|-----------------------------------------------------------------------------------|---------------|----------------------------|------------------|----------|
| 1<br>2<br>3<br>4<br>5<br>6<br>7        | Building and Grounds Cleaning and Maintenance Occupations (37-0000) | Hanrath et al., 2020 <sup>32</sup> | n=515  | Maids and Housekeeping Cleaners | Cross-sectional survey                                                            | 05/29 - 07/06 | The United Kingdom         | 13.2%            | High     |
| 8<br>9<br>10<br>11<br>12               | Building and Grounds Cleaning and Maintenance Occupations (37-0000) | Khan et al., 2020 <sup>127</sup>   | n=276  | Maids and Housekeeping Cleaners | Cross-sectional survey                                                            | 06/15 - 06/29 | India                      | 3.3% (1.7-6.2%)  | Moderate |
| 13<br>14<br>15<br>16<br>17<br>18<br>19 | Building and Grounds Cleaning and Maintenance Occupations (37-0000) | Leidner et al., 2020 <sup>22</sup> | n=137  | Maids and Housekeeping Cleaners | Cross sectional study with prospective cohort follow up of a subset of the sample | 04/08 - 05/22 | United States of America   | 8.03%            | High     |
| 20<br>21<br>22<br>23<br>24             | Building and Grounds Cleaning and Maintenance Occupations (37-0000) | Moscola et al., 2020 <sup>89</sup> | n=7314 | Maids and Housekeeping Cleaners | Cross-sectional survey                                                            | 04/20 - 06/23 | United States of America   | 20.9%            | High     |
| 25<br>26<br>27<br>28<br>29             | Building and Grounds Cleaning and Maintenance Occupations (37-0000) | Shakiba et al., 2020 <sup>10</sup> | n=159  | Maids and Housekeeping Cleaners | Cross-sectional survey                                                            | 04/11 - 04/19 | Iran (Islamic Republic of) | 25% (13.6-37.5%) | Moderate |
| 30<br>31<br>32<br>33<br>34             | Building and Grounds Cleaning and Maintenance Occupations (37-0000) | Shields et al., 2020 <sup>97</sup> | n=29   | Maids and Housekeeping Cleaners | Cross-sectional survey                                                            | 04/24 - 04/25 | The United Kingdom         | 34.5%            | High     |
| 35<br>36<br>37<br>38<br>39<br>40       | Building and Grounds Cleaning and Maintenance Occupations (37-0000) | Siddiqui et al., 2020 <sup>2</sup> | n=46   | Maids and Housekeeping Cleaners | Prospective cohort                                                                | 04/15 - 08/15 | India                      | 21.7%            | High     |



|                                                 |                                     |       |                                                |                        |               |                          |                    |          |
|-------------------------------------------------|-------------------------------------|-------|------------------------------------------------|------------------------|---------------|--------------------------|--------------------|----------|
| Personal Care and Service Occupations (39-0000) | Biggs et al., 2020 <sup>3</sup>     | n=10  | Hairdressers, Hairstylists, and Cosmetologists | Cross-sectional survey | 04/28 - 05/03 | United States of America | 10%                | Moderate |
| Personal Care and Service Occupations (39-0000) | Biggs et al., 2020 <sup>3</sup>     | n=48  | Childcare Workers                              | Cross-sectional survey | 04/28 - 05/03 | United States of America | 0%                 | Moderate |
| Personal Care and Service Occupations (39-0000) | Chen et al., 2020 <sup>135</sup>    | n=11  | Personal Care Aides                            | Cross-sectional survey | 02/19 - 02/19 | China                    | 9.09%              | High     |
| Personal Care and Service Occupations (39-0000) | Galan et al., 2020 <sup>20</sup>    | n=337 | Personal Care Aides                            | Cross-sectional survey | 04/14 - 04/27 | Spain                    | 27.89%             | High     |
| Personal Care and Service Occupations (39-0000) | Galan et al., 2020 <sup>20</sup>    | n=168 | Personal Care Aides                            | Cross-sectional survey | 04/14 - 04/27 | Spain                    | 27.38%             | High     |
| Personal Care and Service Occupations (39-0000) | Godbout et al., 2020 <sup>138</sup> | n=86  | Personal Care Aides                            | Cross-sectional survey | 07/27 - 10/02 | United States of America | 2.32%              | High     |
| Personal Care and Service Occupations (39-0000) | Hassan et al., 2020 <sup>185</sup>  | n=403 | Personal Care Aides                            | Cross-sectional survey | 05/11 - 06/17 | Sweden                   | 20.1%              | High     |
| Personal Care and Service Occupations (39-0000) | Kumar et al., 2020 <sup>142</sup>   | n=292 | Personal Care Aides                            | Cross-sectional survey | 06/01 - 06/30 | India                    | 18.5% (14.5-23.3%) | High     |
| Personal Care and Service Occupations (39-0000) | Ladhani et al., 2020 <sup>186</sup> | n=208 | Personal Care Aides                            | Prospective cohort     | 04/10 - 04/13 | The United Kingdom       | 75% (68.7-80.4%)   | High     |

|                                                 |                                       |        |                               |                        |               |                          |                    |          |
|-------------------------------------------------|---------------------------------------|--------|-------------------------------|------------------------|---------------|--------------------------|--------------------|----------|
| Personal Care and Service Occupations (39-0000) | Lindahl et al., 2020 <sup>187</sup>   | n=1005 | Personal Care Aides           | Cross-sectional survey | 04/01 - 04/20 | Sweden                   | 22.9% (20.4-25.7%) | High     |
| Personal Care and Service Occupations (39-0000) | Regan et al., 2020 <sup>188</sup>     | n=305  | Personal Care Aides           | Cross-sectional survey | 04/15 - 05/06 | United States of America | 23.6%              | Unclear  |
| Personal Care and Service Occupations (39-0000) | Siddiqui et al., 2020 <sup>2</sup>    | n=5    | Personal Care Aides           | Prospective cohort     | 04/15 - 08/15 | India                    | 40%                | High     |
| Personal Care and Service Occupations (39-0000) | Venugopal et al., 2020 <sup>150</sup> | n=72   | Personal Care Aides           | Cross-sectional survey | 03/01 - 05/01 | United States of America | 28%                | Moderate |
| Personal Care and Service Occupations (39-0000) | Viegas et al., 2020 <sup>110</sup>    | n=85   | Personal Care Aides           | Cross-sectional survey | 08/03 - 08/21 | Mozambique               | 1.18%              | High     |
| Sales and Related Occupations (41-0000)         | Arnaldo et al., 2020 <sup>13</sup>    | n=928  | Sales and Related Occupations | Cross-sectional survey | 07/06 - 07/13 | Mozambique               | 6.5%               | High     |
| Sales and Related Occupations (41-0000)         | Arnaldo et al., 2020 <sup>48</sup>    | n=1123 | Sales and Related Occupations | Cross-sectional survey | 08/10 - 08/21 | Mozambique               | 1.6%               | High     |
| Sales and Related Occupations (41-0000)         | Langa et al., 2020 <sup>181</sup>     | n=871  | Sales and Related Occupations | Cross-sectional survey | 09/28 - 10/09 | Mozambique               | 0.2%               | High     |
| Sales and Related Occupations (41-0000)         | Mabunda et al., 2020 <sup>15</sup>    | n=1585 | Sales and Related Occupations | Cross-sectional survey | 09/21 - 10/02 | Mozambique               | 8.3%               | High     |
| Sales and Related Occupations (41-0000)         | Macicame et al., 2020 <sup>182</sup>  | n=1288 | Sales and Related Occupations | Cross-sectional survey | 09/14 - 09/30 | Mozambique               | 4.97%              | High     |

|                                         |                                     |         |                               |                        |               |                            |                    |          |
|-----------------------------------------|-------------------------------------|---------|-------------------------------|------------------------|---------------|----------------------------|--------------------|----------|
| Sales and Related Occupations (41-0000) | Mahomed et al., 2020 <sup>81</sup>  | n=1556  | Sales and Related Occupations | Cross-sectional survey | 08/31 - 10/12 | Mozambique                 | 0.8%               | High     |
| Sales and Related Occupations (41-0000) | Mahumane et al., 2020 <sup>82</sup> | n=643   | Sales and Related Occupations | Cross-sectional survey | 11/02 - 11/17 | Mozambique                 | 1.9%               | High     |
| Sales and Related Occupations (41-0000) | Arnaldo et al., 2020 <sup>14</sup>  | n=472   | Sales and Related Occupations | Cross-sectional survey | 11/16 - 11/21 | Mozambique                 | 6.8%               | High     |
| Sales and Related Occupations (41-0000) | Arnaldo et al., 2020 <sup>14</sup>  | n=460   | Sales and Related Occupations | Cross-sectional survey | 11/02 - 11/12 | Mozambique                 | 5.9%               | High     |
| Sales and Related Occupations (41-0000) | Mahomed et al., 2020 <sup>16</sup>  | n=517   | Sales and Related Occupations | Cross-sectional survey | 11/26 - 12/03 | Mozambique                 | 8.9%               | High     |
| Sales and Related Occupations (41-0000) | Mahomed et al., 2020 <sup>16</sup>  | n=1001  | Sales and Related Occupations | Cross-sectional survey | 11/07 - 11/21 | Mozambique                 | 4.5%               | High     |
| Sales and Related Occupations (41-0000) | Biggs et al., 2020 <sup>3</sup>     | n=19    | Retail Sales Workers          | Cross-sectional survey | 04/28 - 05/03 | United States of America   | 0%                 | Moderate |
| Sales and Related Occupations (41-0000) | Poustchi et al., 2020 <sup>28</sup> | n=753   | Cashiers                      | Cross-sectional survey | 04/17 - 06/02 | Iran (Islamic Republic of) | 16.1% (12.9-19.2%) | Moderate |
| Sales and Related Occupations (41-0000) | Alali et al., 2020 <sup>189</sup>   | n=525   | Cashiers                      | Cross-sectional survey | 05/23 - 06/26 | Kuwait                     | 38.1% (34-42.3%)   | High     |
| Sales and Related Occupations (41-0000) | Denyer et al., 2020 <sup>60</sup>   | n=19075 | Retail Salespersons           | Cross-sectional survey | 05/12 - 05/18 | Japan                      | 0.04%              | Unclear  |
| Sales and Related Occupations (41-0000) | Kern et al., 2020 <sup>73</sup>     | n=300   | Retail Salespersons           | Cross-sectional survey | 04/09 - 04/16 | Germany                    | 0.33% (0.01-1.84%) | High     |



|                                                         |                                        |        |                                               |                        |               |                          |                   |          |
|---------------------------------------------------------|----------------------------------------|--------|-----------------------------------------------|------------------------|---------------|--------------------------|-------------------|----------|
| Office and Administrative Support Occupations (43-0000) | Rosser et al., 2020 <sup>33</sup>      | n=972  | Office and Administrative Support Occupations | Cross-sectional survey | 04/20 - 05/20 | United States of America | 1.34%             | High     |
| Office and Administrative Support Occupations (43-0000) | Tsitsilonis et al., 2020 <sup>12</sup> | n=504  | Office and Administrative Support Occupations | Cross-sectional survey | 06/15 - 07/15 | Greece                   | 0.48% (0-2.37%)   | Moderate |
| Office and Administrative Support Occupations (43-0000) | Khan et al., 2020 <sup>45</sup>        | n=37   | Hotel, Motel, and Resort Desk Clerks          | Cross-sectional survey | 07/01 - 07/15 | India                    | 10.8% (4.1-25.5%) | Moderate |
| Office and Administrative Support Occupations (43-0000) | Brunner et al., 2020 <sup>54</sup>     | n=26   | Receptionists and Information Clerks          | Cross-sectional survey | 05/04 - 05/29 | United States of America | 0%                | High     |
| Office and Administrative Support Occupations (43-0000) | Favara et al., 2020 <sup>136</sup>     | n=10   | Receptionists and Information Clerks          | Prospective cohort     | 06/01 - 06/07 | The United Kingdom       | 0%                | High     |
| Office and Administrative Support Occupations (43-0000) | Moscola et al., 2020 <sup>89</sup>     | n=9645 | Receptionists and Information Clerks          | Cross-sectional survey | 04/20 - 06/23 | United States of America | 12.6%             | High     |
| Office and Administrative Support Occupations (43-0000) | Biggs et al., 2020 <sup>3</sup>        | n=11   | Shipping, Receiving, and Traffic Clerks       | Cross-sectional survey | 04/28 - 05/03 | United States of America | 18.18%            | Moderate |
| Office and Administrative                               | Silva et al., 2020 <sup>34</sup>       | n=82   | Stock Clerks and Order Fillers                | Cross-sectional survey | 06/05 - 07/31 | Brazil                   | 4.88%             | High     |

|                                                         |                                     |        |                                                               |                        |               |                          |                 |          |
|---------------------------------------------------------|-------------------------------------|--------|---------------------------------------------------------------|------------------------|---------------|--------------------------|-----------------|----------|
| Support Occupations (43-0000)                           |                                     |        |                                                               |                        |               |                          |                 |          |
| Office and Administrative Support Occupations (43-0000) | Khan et al., 2020 <sup>45</sup>     | n=186  | Secretaries and Administrative Assistants                     | Cross-sectional survey | 07/01 - 07/15 | India                    | 3.8% (1.8-7.7%) | Moderate |
| Office and Administrative Support Occupations (43-0000) | Alemu et al., 2020 <sup>6</sup>     | n=48   | Executive Secretaries and Executive Administrative Assistants | Cross-sectional survey | 04/23 - 04/28 | Ethiopia                 | 2.1%            | Moderate |
| Office and Administrative Support Occupations (43-0000) | Barallat et al., 2020 <sup>50</sup> | n=1181 | Executive Secretaries and Executive Administrative Assistants | Cross-sectional survey | 05/04 - 05/22 | Spain                    | 6.52%           | High     |
| Office and Administrative Support Occupations (43-0000) | Lumley et al., 2020 <sup>9</sup>    | n=1557 | Executive Secretaries and Executive Administrative Assistants | Prospective cohort     | 04/23 - 11/30 | The United Kingdom       | 6.74%           | Moderate |
| Office and Administrative Support Occupations (43-0000) | Reuben et al., 2020 <sup>168</sup>  | n=18   | Executive Secretaries and Executive Administrative Assistants | Cross-sectional survey | 05/28 - 07/15 | United States of America | 0%              | High     |
| Office and Administrative Support Occupations (43-0000) | Akinbami et al., 2020 <sup>46</sup> | n=964  | Medical Secretaries                                           | Cross-sectional survey | 05/18 - 06/13 | United States of America | 8% (6.4-9.9%)   | Moderate |
| Office and Administrative Support                       | Alharbi et al., 2020 <sup>125</sup> | n=8    | Medical Secretaries                                           | Cross-sectional survey | 04/18 - 06/17 | Saudi Arabia             | 25%             | High     |

|                                                         |                                          |        |                     |                                                              |               |                          |       |          |
|---------------------------------------------------------|------------------------------------------|--------|---------------------|--------------------------------------------------------------|---------------|--------------------------|-------|----------|
| Occupations (43-0000)                                   |                                          |        |                     |                                                              |               |                          |       |          |
| Office and Administrative Support Occupations (43-0000) | Dimcheff et al., 2020 <sup>157</sup>     | n=357  | Medical Secretaries | Cross-sectional survey                                       | 06/08 - 07/08 | United States of America | 4.2%  | Moderate |
| Office and Administrative Support Occupations (43-0000) | Erber et al., 2020 <sup>31</sup>         | n=557  | Medical Secretaries | Cross-sectional survey                                       | 04/14 - 05/29 | Germany                  | 3.78% | High     |
| Office and Administrative Support Occupations (43-0000) | Finkenzeller et al., 2020 <sup>158</sup> | n=240  | Medical Secretaries | Prospective cohort                                           | 06/29 - 07/29 | Germany                  | 7.1%  | Moderate |
| Office and Administrative Support Occupations (43-0000) | Goenka et al., 2020 <sup>25</sup>        | n=75   | Medical Secretaries | Cross-sectional survey                                       | 07/12 - 08/23 | India                    | 8%    | Moderate |
| Office and Administrative Support Occupations (43-0000) | Goenka et al., 2020 <sup>25</sup>        | n=75   | Medical Secretaries | Cross-sectional survey                                       | 07/12 - 08/23 | India                    | 8%    | Moderate |
| Office and Administrative Support Occupations (43-0000) | Iversen et al., 2020 <sup>8</sup>        | n=2631 | Medical Secretaries | Cross-sectional survey                                       | 04/15 - 04/22 | Denmark                  | 2.7%  | Low      |
| Office and Administrative Support Occupations (43-0000) | Leidner et al., 2020 <sup>22</sup>       | n=793  | Medical Secretaries | Cross sectional study with prospective cohort follow up of a | 04/08 - 05/22 | United States of America | 3.15% | High     |

|                                                         |                                    |        |                        |                        |               |                    |                |          |
|---------------------------------------------------------|------------------------------------|--------|------------------------|------------------------|---------------|--------------------|----------------|----------|
|                                                         |                                    |        |                        | subset of the sample   |               |                    |                |          |
| Office and Administrative Support Occupations (43-0000) | Mesnil et al., 2020 <sup>143</sup> | n=184  | Medical Secretaries    | Cross-sectional survey | 06/08 - 06/22 | France             | 14.13%         | High     |
| Office and Administrative Support Occupations (43-0000) | Nishida et al., 2020 <sup>90</sup> | n=98   | Medical Secretaries    | Cross-sectional survey | 06/12 - 06/19 | Japan              | 1% (0.18-5.6%) | Moderate |
| Office and Administrative Support Occupations (43-0000) | Noor et al., 2020 <sup>130</sup>   | n=91   | Medical Secretaries    | Cross-sectional survey | 07/13 - 07/15 | Pakistan           | 43.96%         | Moderate |
| Office and Administrative Support Occupations (43-0000) | Thani et al., 2020 <sup>183</sup>  | n=82   | Medical Secretaries    | Cross-sectional survey | 07/26 - 09/09 | Qatar              | 31.6%          | Moderate |
| Office and Administrative Support Occupations (43-0000) | Zhou et al., 2020 <sup>166</sup>   | n=505  | Medical Secretaries    | Cross-sectional survey | 03/16 - 03/25 | China              | 1.39%          | Moderate |
| Office and Administrative Support Occupations (43-0000) | Chau et al., 2020 <sup>126</sup>   | n=20   | Data Entry Keyers      | Cross-sectional survey | 08/23 - 08/30 | Viet Nam           | 0%             | High     |
| Office and Administrative Support Occupations (43-0000) | Jones et al., 2020 <sup>29</sup>   | n=1233 | Office Clerks, General | Cross-sectional survey | 01/15 - 06/15 | The United Kingdom | 6.1%           | High     |



|                                                         |                                      |       |                                                      |                        |               |                          |        |          |
|---------------------------------------------------------|--------------------------------------|-------|------------------------------------------------------|------------------------|---------------|--------------------------|--------|----------|
| Office and Administrative Support Occupations (43-0000) | Rosser et al., 2020 <sup>33</sup>    | n=218 | Office Clerks, General                               | Cross-sectional survey | 04/20 - 05/20 | United States of America | 0%     | High     |
| Office and Administrative Support Occupations (43-0000) | Satpati et al., 2020 <sup>27</sup>   | n=47  | Office Clerks, General                               | Cross-sectional survey | 07/26 - 08/08 | India                    | 4.26%  | Moderate |
| Office and Administrative Support Occupations (43-0000) | Baracco et al., 2020 <sup>24</sup>   | n=194 | Office and Administrative Support Workers, All Other | Cross-sectional survey | 04/23 - 05/05 | Italy                    | 14.4%  | High     |
| Office and Administrative Support Occupations (43-0000) | Brzostek et al., 2020 <sup>151</sup> | n=286 | Office and Administrative Support Workers, All Other | Cross-sectional survey | 04/17 - 05/07 | United States of America | 45.5%  | Moderate |
| Office and Administrative Support Occupations (43-0000) | Kassem et al., 2020 <sup>72</sup>    | n=7   | Office and Administrative Support Workers, All Other | Cross-sectional survey | 06/01 - 06/14 | Egypt                    | 14.28% | High     |
| Office and Administrative Support Occupations (43-0000) | Kassem et al., 2020 <sup>72</sup>    | n=7   | Office and Administrative Support Workers, All Other | Cross-sectional survey | 06/01 - 06/14 | Egypt                    | 0%     | High     |
| Office and Administrative Support Occupations (43-0000) | Kassem et al., 2020 <sup>72</sup>    | n=7   | Office and Administrative Support Workers, All Other | Cross-sectional survey | 06/01 - 06/14 | Egypt                    | 0%     | High     |

|                                                             |                                     |        |                                                               |                        |               |                          |        |          |
|-------------------------------------------------------------|-------------------------------------|--------|---------------------------------------------------------------|------------------------|---------------|--------------------------|--------|----------|
| Office and Administrative Support Occupations (43-0000)     | Kassem et al., 2020 <sup>72</sup>   | n=7    | Office and Administrative Support Workers, All Other          | Cross-sectional survey | 06/01 - 06/14 | Egypt                    | 14.28% | High     |
| Farming, Fishing, and Forestry Occupations (45-0000)        | Satpati et al., 2020 <sup>27</sup>  | n=53   | Agricultural Workers                                          | Cross-sectional survey | 07/26 - 08/08 | India                    | 0%     | Moderate |
| Farming, Fishing, and Forestry Occupations (45-0000)        | Addetia et al., 2020 <sup>190</sup> | n=120  | Fishers and Related Fishing Workers                           | Retrospective cohort   | 05/01 - 05/31 | United States of America | 5%     | High     |
| Farming, Fishing, and Forestry Occupations (45-0000)        | Arnaldo et al., 2020 <sup>13</sup>  | n=80   | Fishers and Related Fishing Workers                           | Cross-sectional survey | 07/06 - 07/13 | Mozambique               | 5%     | High     |
| Construction and Extraction Occupations (47-0000)           | Biggs et al., 2020 <sup>3</sup>     | n=42   | Construction Trades Workers                                   | Cross-sectional survey | 04/28 - 05/03 | United States of America | 0%     | Moderate |
| Installation, Maintenance, and Repair Occupations (49-0000) | Blairon et al., 2020 <sup>52</sup>  | n=134  | Other Installation, Maintenance, and Repair Occupations       | Cross-sectional survey | 05/25 - 06/19 | Belgium                  | 16.4%  | High     |
| Production Occupations (51-0000)                            | Picon et al., 2020 <sup>191</sup>   | n=40   | Butchers and Other Meat, Poultry, and Fish Processing Workers | Cross-sectional survey | 06/13 - 06/17 | Brazil                   | 15%    | Moderate |
| Production Occupations (51-0000)                            | Picon et al., 2020 <sup>191</sup>   | n=1087 | Miscellaneous Food Processing Workers                         | Cross-sectional survey | 06/13 - 06/17 | Brazil                   | 1.47%  | Moderate |
| Production Occupations (51-0000)                            | Bontadi et al., 2020 <sup>192</sup> | n=1267 | Production Workers, All Other                                 | Cross-sectional survey | 04/11 - 04/29 | Italy                    | 1.58%  | High     |

|                                                                                                                                                                                                                                                                               |                                                          |                                      |       |                                                |                        |               |                          |                 |          |
|-------------------------------------------------------------------------------------------------------------------------------------------------------------------------------------------------------------------------------------------------------------------------------|----------------------------------------------------------|--------------------------------------|-------|------------------------------------------------|------------------------|---------------|--------------------------|-----------------|----------|
| 1<br>2<br>3<br>4<br>5<br>6<br>7<br>8<br>9<br>10<br>11<br>12<br>13<br>14<br>15<br>16<br>17<br>18<br>19<br>20<br>21<br>22<br>23<br>24<br>25<br>26<br>27<br>28<br>29<br>30<br>31<br>32<br>33<br>34<br>35<br>36<br>37<br>38<br>39<br>40<br>41<br>42<br>43<br>44<br>45<br>46<br>47 | Production Occupations (51-0000)                         | Xu et al., 2020 <sup>193</sup>       | n=442 | Production Workers, All Other                  | Cross-sectional survey | 03/09 - 04/10 | China                    | 1.4% (0.6-2.9%) | High     |
|                                                                                                                                                                                                                                                                               | Transportation and Material Moving Occupations (53-0000) | Arnaldo et al., 2020 <sup>13</sup>   | n=248 | Transportation and Material Moving Occupations | Cross-sectional survey | 07/06 - 07/13 | Mozambique               | 4.8%            | High     |
|                                                                                                                                                                                                                                                                               | Transportation and Material Moving Occupations (53-0000) | Arnaldo et al., 2020 <sup>48</sup>   | n=367 | Transportation and Material Moving Occupations | Cross-sectional survey | 08/10 - 08/21 | Mozambique               | 7.4%            | High     |
|                                                                                                                                                                                                                                                                               | Transportation and Material Moving Occupations (53-0000) | Arnaldo et al., 2020 <sup>14</sup>   | n=112 | Transportation and Material Moving Occupations | Cross-sectional survey | 11/16 - 11/21 | Mozambique               | 16.1%           | High     |
|                                                                                                                                                                                                                                                                               | Transportation and Material Moving Occupations (53-0000) | Biggs et al., 2020 <sup>3</sup>      | n=14  | Transportation and Material Moving Occupations | Cross-sectional survey | 04/28 - 05/03 | United States of America | 0%              | Moderate |
|                                                                                                                                                                                                                                                                               | Transportation and Material Moving Occupations (53-0000) | Gudo et al., 2020 <sup>65</sup>      | n=554 | Transportation and Material Moving Occupations | Cross-sectional survey | 06/17 - 06/30 | Mozambique               | 3% (1-4%)       | High     |
|                                                                                                                                                                                                                                                                               | Transportation and Material Moving Occupations (53-0000) | Langa et al., 2020 <sup>181</sup>    | n=230 | Transportation and Material Moving Occupations | Cross-sectional survey | 09/28 - 10/09 | Mozambique               | 0.4%            | High     |
|                                                                                                                                                                                                                                                                               | Transportation and Material Moving Occupations (53-0000) | Mabunda et al., 2020 <sup>15</sup>   | n=473 | Transportation and Material Moving Occupations | Cross-sectional survey | 09/21 - 10/02 | Mozambique               | 8.7%            | High     |
|                                                                                                                                                                                                                                                                               | Transportation and Material Moving Occupations (53-0000) | Macicame et al., 2020 <sup>182</sup> | n=282 | Transportation and Material Moving Occupations | Cross-sectional survey | 09/14 - 09/30 | Mozambique               | 3.19%           | High     |

|                                                                |                                                          |                                      |       |                                                                        |                        |               |                          |                  |          |
|----------------------------------------------------------------|----------------------------------------------------------|--------------------------------------|-------|------------------------------------------------------------------------|------------------------|---------------|--------------------------|------------------|----------|
| 1<br>2<br>3<br>4<br>5<br>6<br>7                                | Transportation and Material Moving Occupations (53-0000) | Mahomed et al., 2020 <sup>81</sup>   | n=334 | Transportation and Material Moving Occupations                         | Cross-sectional survey | 08/31 - 10/12 | Mozambique               | 1.5%             | High     |
| 8<br>9<br>10<br>11                                             | Transportation and Material Moving Occupations (53-0000) | Mahumane et al., 2020 <sup>82</sup>  | n=287 | Transportation and Material Moving Occupations                         | Cross-sectional survey | 11/02 - 11/17 | Mozambique               | 1%               | High     |
| 12<br>13<br>14<br>15                                           | Transportation and Material Moving Occupations (53-0000) | Thani et al., 2020 <sup>183</sup>    | n=435 | Transportation and Material Moving Occupations                         | Cross-sectional survey | 07/26 - 09/09 | Qatar                    | 53.4%            | Moderate |
| 16<br>17<br>18<br>19                                           | Transportation and Material Moving Occupations (53-0000) | Halatoko et al., 2020 <sup>41</sup>  | n=212 | Air Transportation Workers                                             | Cross-sectional survey | 04/23 - 05/08 | Togo                     | 0.9%             | High     |
| 20<br>21<br>22<br>23                                           | Transportation and Material Moving Occupations (53-0000) | Viegas et al., 2020 <sup>110</sup>   | n=623 | Air Transportation Workers                                             | Cross-sectional survey | 08/03 - 08/21 | Mozambique               | 2.25%            | High     |
| 24<br>25<br>26<br>27<br>28                                     | Transportation and Material Moving Occupations (53-0000) | Viegas et al., 2020 <sup>110</sup>   | n=362 | Air Transportation Workers                                             | Cross-sectional survey | 08/03 - 08/21 | Mozambique               | 3.31%            | High     |
| 29<br>30<br>31<br>32                                           | Transportation and Material Moving Occupations (53-0000) | Khan et al., 2020 <sup>127</sup>     | n=57  | Ambulance Drivers and Attendants, Except Emergency Medical Technicians | Cross-sectional survey | 06/15 - 06/29 | India                    | 3.5% (0.9-13.3%) | Moderate |
| 33<br>34<br>35<br>36                                           | Transportation and Material Moving Occupations (53-0000) | Martinez et al., 2020 <sup>121</sup> | n=30  | Heavy and Tractor-Trailer Truck Drivers                                | Cross-sectional survey | 04/16 - 04/17 | United States of America | 16.67%           | High     |
| 37<br>38<br>39<br>40<br>41<br>42<br>43<br>44<br>45<br>46<br>47 | Transportation and Material Moving Occupations (53-0000) | Siddiqui et al., 2020 <sup>2</sup>   | n=9   | Heavy and Tractor-Trailer Truck Drivers                                | Prospective cohort     | 04/15 - 08/15 | India                    | 11.1%            | High     |

|                                                          |                                     |        |                                                        |                        |               |                            |                    |          |    |    |    |    |    |    |    |    |    |    |    |    |    |    |    |    |    |    |    |    |    |    |    |    |    |    |    |    |    |    |    |    |    |    |    |    |    |    |  |  |  |  |  |  |  |  |
|----------------------------------------------------------|-------------------------------------|--------|--------------------------------------------------------|------------------------|---------------|----------------------------|--------------------|----------|----|----|----|----|----|----|----|----|----|----|----|----|----|----|----|----|----|----|----|----|----|----|----|----|----|----|----|----|----|----|----|----|----|----|----|----|----|----|--|--|--|--|--|--|--|--|
| 1                                                        | 2                                   | 3      | 4                                                      | 5                      | 6             | 7                          | 8                  | 9        | 10 | 11 | 12 | 13 | 14 | 15 | 16 | 17 | 18 | 19 | 20 | 21 | 22 | 23 | 24 | 25 | 26 | 27 | 28 | 29 | 30 | 31 | 32 | 33 | 34 | 35 | 36 | 37 | 38 | 39 | 40 | 41 | 42 | 43 | 44 | 45 | 46 | 47 |  |  |  |  |  |  |  |  |
| Transportation and Material Moving Occupations (53-0000) | Halatoko et al., 2020 <sup>41</sup> | n=122  | Taxi Drivers and Chauffeurs                            | Cross-sectional survey | 04/23 - 05/08 | Togo                       | 0.8%               | High     |    |    |    |    |    |    |    |    |    |    |    |    |    |    |    |    |    |    |    |    |    |    |    |    |    |    |    |    |    |    |    |    |    |    |    |    |    |    |  |  |  |  |  |  |  |  |
| Transportation and Material Moving Occupations (53-0000) | Poustchi et al., 2020 <sup>28</sup> | n=718  | Taxi Drivers and Chauffeurs                            | Cross-sectional survey | 04/17 - 06/02 | Iran (Islamic Republic of) | 14.1% (11.4-16.9%) | Moderate |    |    |    |    |    |    |    |    |    |    |    |    |    |    |    |    |    |    |    |    |    |    |    |    |    |    |    |    |    |    |    |    |    |    |    |    |    |    |  |  |  |  |  |  |  |  |
| Transportation and Material Moving Occupations (53-0000) | Alemu et al., 2020 <sup>6</sup>     | n=8    | Parking Lot Attendants                                 | Cross-sectional survey | 04/23 - 04/28 | Ethiopia                   | 12.5%              | Moderate |    |    |    |    |    |    |    |    |    |    |    |    |    |    |    |    |    |    |    |    |    |    |    |    |    |    |    |    |    |    |    |    |    |    |    |    |    |    |  |  |  |  |  |  |  |  |
| Transportation and Material Moving Occupations (53-0000) | Alemu et al., 2020 <sup>6</sup>     | n=110  | Laborers and Freight, Stock, and Material Movers, Hand | Cross-sectional survey | 04/23 - 04/28 | Ethiopia                   | 10%                | Moderate |    |    |    |    |    |    |    |    |    |    |    |    |    |    |    |    |    |    |    |    |    |    |    |    |    |    |    |    |    |    |    |    |    |    |    |    |    |    |  |  |  |  |  |  |  |  |
| Transportation and Material Moving Occupations (53-0000) | Khan et al., 2020 <sup>45</sup>     | n=97   | Laborers and Freight, Stock, and Material Movers, Hand | Cross-sectional survey | 07/01 - 07/15 | India                      | 2.1% (0.5-7.9%)    | Moderate |    |    |    |    |    |    |    |    |    |    |    |    |    |    |    |    |    |    |    |    |    |    |    |    |    |    |    |    |    |    |    |    |    |    |    |    |    |    |  |  |  |  |  |  |  |  |
| Transportation and Material Moving Occupations (53-0000) | Satpati et al., 2020 <sup>27</sup>  | n=63   | Laborers and Freight, Stock, and Material Movers, Hand | Cross-sectional survey | 07/26 - 08/08 | India                      | 12.7%              | Moderate |    |    |    |    |    |    |    |    |    |    |    |    |    |    |    |    |    |    |    |    |    |    |    |    |    |    |    |    |    |    |    |    |    |    |    |    |    |    |  |  |  |  |  |  |  |  |
| Not employed (mixed)*                                    | Carrat et al., 2020 <sup>4</sup>    | n=6295 | Unemployed                                             | Prospective cohort     | 05/04 - 06/23 | France                     | 4.9% (4.1-5.6%)    | Moderate |    |    |    |    |    |    |    |    |    |    |    |    |    |    |    |    |    |    |    |    |    |    |    |    |    |    |    |    |    |    |    |    |    |    |    |    |    |    |  |  |  |  |  |  |  |  |
| Not employed (mixed)*                                    | Carrat et al., 2020 <sup>4</sup>    | n=1457 | Unemployed                                             | Prospective cohort     | 05/04 - 06/23 | France                     | 8.3% (6.4-10%)     | Moderate |    |    |    |    |    |    |    |    |    |    |    |    |    |    |    |    |    |    |    |    |    |    |    |    |    |    |    |    |    |    |    |    |    |    |    |    |    |    |  |  |  |  |  |  |  |  |
| Not employed (mixed)*                                    | Carrat et al., 2020 <sup>4</sup>    | n=306  | Unemployed                                             | Prospective cohort     | 05/04 - 06/23 | France                     | 7.2% (2.3-11.1%)   | Moderate |    |    |    |    |    |    |    |    |    |    |    |    |    |    |    |    |    |    |    |    |    |    |    |    |    |    |    |    |    |    |    |    |    |    |    |    |    |    |  |  |  |  |  |  |  |  |
| Not employed (mixed)*                                    | Carrat et al., 2020 <sup>4</sup>    | n=125  | Unemployed                                             | Prospective cohort     | 05/04 - 06/23 | France                     | 3.8% (0.5-6.3%)    | Moderate |    |    |    |    |    |    |    |    |    |    |    |    |    |    |    |    |    |    |    |    |    |    |    |    |    |    |    |    |    |    |    |    |    |    |    |    |    |    |  |  |  |  |  |  |  |  |
| Not employed (mixed)*                                    | Carrat et al., 2020 <sup>4</sup>    | n=402  | Unemployed                                             | Prospective cohort     | 05/04 - 06/23 | France                     | 7.8% (4.7-10.4%)   | Moderate |    |    |    |    |    |    |    |    |    |    |    |    |    |    |    |    |    |    |    |    |    |    |    |    |    |    |    |    |    |    |    |    |    |    |    |    |    |    |  |  |  |  |  |  |  |  |

|                       |                                        |         |            |                        |               |                          |                    |          |
|-----------------------|----------------------------------------|---------|------------|------------------------|---------------|--------------------------|--------------------|----------|
| Not employed (mixed)* | Chamie et al., 2020 <sup>194</sup>     | n=230   | Unemployed | Cross-sectional survey | 04/25 - 04/28 | United States of America | 4.3%               | Moderate |
| Not employed (mixed)* | McLaughlin et al., 2020 <sup>195</sup> | n=241   | Unemployed | Cross-sectional survey | 05/04 - 05/19 | United States of America | 19.3% (14.6-24.5%) | Moderate |
| Not employed (mixed)* | Merkely et al., 2020 <sup>1</sup>      | n=1095  | Unemployed | Cross-sectional survey | 05/01 - 05/16 | Hungary                  | 0.43% (0.16-0.84%) | Moderate |
| Not employed (mixed)* | Munoz et al., 2020 <sup>196</sup>      | n=905   | Unemployed | Cross-sectional survey | 07/15 - 07/16 | Argentina                | 20%                | Moderate |
| Not employed (mixed)* | Richard et al., 2020 <sup>5</sup>      | n=549   | Unemployed | Cross-sectional survey | 04/06 - 06/30 | Switzerland              | 6%                 | Low      |
| Not employed (mixed)* | Satpati et al., 2020 <sup>27</sup>     | n=47    | Unemployed | Cross-sectional survey | 07/26 - 08/08 | India                    | 2.13%              | Moderate |
| Not employed (mixed)* | Ward et al., 2020 <sup>113</sup>       | n=59369 | Unemployed | Cross-sectional survey | 09/15 - 09/28 | The United Kingdom       | 3.35%              | Moderate |

1. Merkely B, Szabó AJ, Kosztin A, et al. Novel coronavirus epidemic in the Hungarian population, a cross-sectional nationwide survey to support the exit policy in Hungary. *GeroScience*. 2020;42(4):1063-1074. doi:[10.1007/s11357-020-00226-9](https://doi.org/10.1007/s11357-020-00226-9)

2. Siddiqui S, Naushin S, Pradhan S, et al. SARS-CoV-2 antibody seroprevalence and stability in a tertiary care hospital-setting. *medRxiv*. Published online September 2020. doi:[10.1101/2020.09.02.20186486](https://doi.org/10.1101/2020.09.02.20186486)

3. Biggs HM, Harris JB, Breakwell L, et al. Estimated Community Seroprevalence of SARS-CoV-2 Antibodies Two Georgia Counties, April 28-May 3, 2020. *MMWR Morbidity and Mortality Weekly Report*. 2020;69(29):965-970. doi:[10.15585/mmwr.mm6929e2](https://doi.org/10.15585/mmwr.mm6929e2)

4. Carrat F, Lamballerie X de, Rahib D, et al. Seroprevalence of SARS-CoV-2 among adults in three regions of France following the lockdown and associated risk factors: A multicohort study. *medRxiv*. Published online September 2020:2020.09.16.20195693. doi:[10.1101/2020.09.16.20195693](https://doi.org/10.1101/2020.09.16.20195693)

5. Richard A, Wisniak A, Perez-Saez J, et al. Seroprevalence of anti-SARS-CoV-2 IgG antibodies, risk factors for infection and associated symptoms in Geneva, Switzerland: A population-based study. *medRxiv*. Published online December 2020. doi:[10.1101/2020.12.16.20248180](https://doi.org/10.1101/2020.12.16.20248180)

6. Alemu BN, Addissie A, Mamo G, et al. *Sero-Prevalence of Anti-SARS-CoV-2 Antibodies in Addis Ababa, Ethiopia*. Microbiology; 2020. doi:[10.1101/2020.10.13.337287](https://doi.org/10.1101/2020.10.13.337287)

7. Brehm T, Schwinge D, Lampalzer S, et al. Seroprevalence of SARS-CoV-2 antibodies among hospital workers in a German tertiary care center: A sequential follow-up study. *International Journal of Hygiene and Environmental Health*. 2021;232:113671. doi:[10.1016/j.ijheh.2020.113671](https://doi.org/10.1016/j.ijheh.2020.113671)

8. Iversen K, Bundgaard H, Hasselbalch RB, et al. Risk of COVID-19 in health-care workers in Denmark: An observational cohort study. *The Lancet Infectious diseases*. Published online August 2020. doi:[10.1016/S1473-3099\(20\)30589-2](https://doi.org/10.1016/S1473-3099(20)30589-2)

- 1  
2  
3 9. Lumley SF, O'Donnell D, Stoesser NE, et al. Antibody Status and Incidence of SARS-CoV-2 Infection in Health Care Workers. *New England Journal of Medicine*.  
4 Published online December 2020:NEJMoa2034545. doi:[10.1056/NEJMoa2034545](https://doi.org/10.1056/NEJMoa2034545)  
5
- 6 10. Shakiba M, Nazemipour M, Salari A, et al. Seroprevalence of SARS-CoV-2 in Guilan Province, Iran, April 2020. *Emerging Infectious Disease journal*. 2021;27(2).  
7 doi:[10.3201/eid2702.201960](https://doi.org/10.3201/eid2702.201960)
- 8  
9 11. Tilley K, Ayvazyan V, Martinez L, et al. A Cross-Sectional Study Examining the Seroprevalence of Severe Acute Respiratory Syndrome Coronavirus 2 Antibodies in  
10 a University Student Population. *Journal of Adolescent Health*. 2020;67(6):763-768. doi:[10.1016/j.jadohealth.2020.09.001](https://doi.org/10.1016/j.jadohealth.2020.09.001)
- 11  
12 12. Tsitsilonis OE, Paraskevis D, Lianidou E, et al. Seroprevalence of Antibodies against SARS-CoV-2 among the Personnel and Students of the National and  
13 Kapodistrian University of Athens, Greece: A Preliminary Report. *Life*. 2020;10(9):214. doi:[10.3390/life10090214](https://doi.org/10.3390/life10090214)
- 14  
15 13. Paulo Arnaldo. *Inquérito Sero-Epidemiológico de SARS-CoV-2 Na Cidade de Pemba (InCOVID 2020)*. República de Moçambique Ministério da Saúde; 2020.
- 16  
17 14. Paulo Arnaldo. *Inquérito Sero-Epidemiológico de SARS-CoV-2 Nas Cidades de Xai-Xai E Chókwè (InCOVID 2020)*. República de Moçambique Ministério da Saúde;  
18 2020.
- 19  
20 15. Nedio Mabunda. *Inquérito Sero-Epidemiológico de SARS-CoV-2 Na Cidade de Beira (InCOVID 2020)*. República de Moçambique Ministério da Saúde; 2020.
- 21  
22 16. Mussagy Mahomed. *Inquérito Sero-Epidemiológico de SARS-CoV-2 Na Cidade de Maxixe E Vila de Massinga (InCOVID 2020)*. República de Moçambique  
23 Ministério da Saúde; 2020.
- 24  
25 17. Payne DC, Smith-Jeffcoat SE, Nowak G, et al. SARS-CoV-2 Infections and Serologic Responses from a Sample of U.S. Navy Service Members - USS Theodore  
26 Roosevelt, April 2020. *MMWR Morbidity and mortality weekly report*. 2020;69(23):714-721. doi:[10.15585/mmwr.mm6923e4](https://doi.org/10.15585/mmwr.mm6923e4)
- 27  
28 18. COVID-19 Serology Tests Still Show Low Antibody Rate of 0.07%. *KBS World Radio*.
- 29  
30 19. Favara DM, McAdam K, Cooke A, et al. SARS-CoV-2 antigen and antibody prevalence among UK staff working with cancer patients during the COVID-19  
31 pandemic. *medRxiv*. Published online September 2020:2020.09.18.20197590. doi:[10.1101/2020.09.18.20197590](https://doi.org/10.1101/2020.09.18.20197590)
- 32  
33 20. Galán MI, Velasco M, Casas ML, et al. Hospital-Wide SARS-CoV-2 seroprevalence in health care workers in a Spanish teaching hospital. *Enfermedades Infecciosas y*  
34 *Microbiología Clínica*. Published online December 2020:S0213005X20304183. doi:[10.1016/j.eimc.2020.11.015](https://doi.org/10.1016/j.eimc.2020.11.015)
- 35  
36 21. Hunter BR, Dbeibo L, Weaver CS, et al. Seroprevalence of severe acute respiratory coronavirus virus 2 (SARS-CoV-2) antibodies among healthcare workers with  
37 differing levels of coronavirus disease 2019 (COVID-19) patient exposure. *Infection Control & Hospital Epidemiology*. Published online August 2020:1-2.  
38 doi:[10.1017/ice.2020.390](https://doi.org/10.1017/ice.2020.390)
- 39  
40 22. Leidner R, Frary A, Cramer J, et al. Longitudinal SARS-CoV-2 serosurveillance of over ten thousand health care workers in the Providence Oregon cohort. *medRxiv*.  
41 Published online August 2020:2020.08.16.20176107. doi:[10.1101/2020.08.16.20176107](https://doi.org/10.1101/2020.08.16.20176107)
- 42  
43 23. Martin CA, Patel P, Goss C, et al. Demographic and occupational determinants of anti-SARS-CoV-2 IgG seropositivity in hospital staff. *Journal of Public Health*.  
44 2020;(fdaa199). doi:[10.1093/pubmed/fdaa199](https://doi.org/10.1093/pubmed/fdaa199)  
45  
46  
47



- 1  
2  
3 24. Baracco A, Perotti G, Filippin A, et al. *SARS-CoV-2 Antibody Prevalence in Health Care Workers of Lodi Hospital, the COVID-19 Italian Epicentre*. Social Science  
4 Research Network; 2020.  
5  
6 25. Goenka M, Afzalpurkar S, Goenka U, et al. Seroprevalence of COVID-19 Amongst Health Care Workers in a Tertiary Care Hospital of a Metropolitan City from  
7 India. *The Journal of the Association of Physicians of India*. 2020;68(11):14-19.  
8  
9 26. Goenka MK, Shah BB, Goenka U, et al. COVID-19 prevalence among health-care workers of Gastroenterology department: An audit from a tertiary-care hospital in  
10 India. *JGH Open*. 2021;5(1):56-63. doi:[10.1002/jgh3.12447](https://doi.org/10.1002/jgh3.12447)  
11  
12 27. Satpati P, Sarangi S, Gantait K, et al. *Sero-Surveillance (IgG) of SARS-CoV-2 Among Asymptomatic General Population of Paschim Medinipur, West Bengal, India*.  
13 Infectious Diseases (except HIV/AIDS); 2020. doi:[10.1101/2020.09.12.20193219](https://doi.org/10.1101/2020.09.12.20193219)  
14  
15 28. Poustchi H, Darvishian M, Mohammadi Z, et al. SARS-CoV-2 antibody seroprevalence in the general population and high-risk occupational groups across 18 cities in  
16 Iran: A population-based cross-sectional study. *The Lancet Infectious Diseases*. 2020;0(0). doi:[10.1016/S1473-3099\(20\)30858-6](https://doi.org/10.1016/S1473-3099(20)30858-6)  
17  
18 29. Jones CR, Hamilton FW, Thompson A, Morris TT, Moran E. SARS-CoV-2 IgG seroprevalence in healthcare workers and other staff at North Bristol NHS Trust: A  
19 sociodemographic analysis. *Journal of Infection*. 2020;0(0). doi:[10.1016/j.jinf.2020.11.036](https://doi.org/10.1016/j.jinf.2020.11.036)  
20  
21 30. Anna F, Goyard S, Lalanne AI, et al. High seroprevalence but short-lived immune response to SARS-CoV-2 infection in Paris. *medRxiv*. Published online November  
22 2020:2020.10.25.20219030. doi:[10.1101/2020.10.25.20219030](https://doi.org/10.1101/2020.10.25.20219030)  
23  
24 31. Erber J, Kappler V, Haller B, et al. Strategies for infection control and prevalence of anti-SARS-CoV-2 IgG in 4,554 employees of a university hospital in Munich,  
25 Germany. Published online October 2020. doi:[10.1101/2020.10.04.20206136](https://doi.org/10.1101/2020.10.04.20206136)  
26  
27 32. Hanrath AT, Loeff IS van der, Lendrem DW, et al. SARS-CoV-2 testing of 11,884 healthcare workers at an acute NHS hospital trust in England: A retrospective  
28 analysis. *medRxiv*. Published online December 2020:2020.12.22.20242362. doi:[10.1101/2020.12.22.20242362](https://doi.org/10.1101/2020.12.22.20242362)  
29  
30 33. Rosser JI, Röltgen K, Dymock M, et al. Severe acute respiratory coronavirus virus 2 (SARS-CoV-2) seroprevalence in healthcare personnel in northern California  
31 early in the coronavirus disease 2019 (COVID-19) pandemic. *Infection Control & Hospital Epidemiology*. Published online December 2020:1-7.  
32 doi:[10.1017/ice.2020.1358](https://doi.org/10.1017/ice.2020.1358)  
33  
34 34. Silva VO, de Oliveira EL, Castejon MJ, et al. Prevalence of antibodies against sars-cov-2 in professionals of a public health laboratory at são paulo, sp, brazil.  
35 *medRxiv*. Published online October 2020. doi:[10.1101/2020.10.19.20213421](https://doi.org/10.1101/2020.10.19.20213421)  
36  
37 35. Sabourin KR, Schultz J, Romero J, et al. Risk Factors of SARS-CoV-2 Antibodies in Arapahoe County First Responders - the COVID-19 Arapahoe SErosurveillance  
38 Study (CASES) Project. *Journal of Occupational and Environmental Medicine*. Published online December 2020. doi:[10.1097/JOM.0000000000002099](https://doi.org/10.1097/JOM.0000000000002099)  
39  
40 36. Yogo N, Greenwood KL, Thompson L, et al. Point prevalence survey to evaluate the seropositivity for coronavirus disease 2019 (COVID-19) among high-risk  
41 healthcare workers. *Infection Control and Hospital Epidemiology*. Published online December 2020:1-6. doi:[10.1017/ice.2020.1370](https://doi.org/10.1017/ice.2020.1370)  
42  
43 37. Figueiredo-Campos P, Blankenhaus B, Mota C, et al. Seroprevalence of anti-SARS-CoV-2 antibodies in COVID-19 patients and healthy volunteers up to 6 months  
44 post disease onset. *European Journal of Immunology*. 2020;50(12):2025-2040. doi:[10.1002/eji.202048970](https://doi.org/10.1002/eji.202048970)  
45  
46  
47



- 1  
2  
3 38. Gonçalves J, Sousa RL, Jacinto MJ, et al. Evaluating SARS-CoV-2 Seroconversion Following Relieve of Confinement Measures. *Frontiers in Medicine*. 2020;7.  
4 doi:[10.3389/fmed.2020.603996](https://doi.org/10.3389/fmed.2020.603996)  
5
- 6 39. Fontanet A, Grant R, Tondeur L, et al. SARS-CoV-2 infection in primary schools in northern France: A retrospective cohort study in an area of high transmission.  
7 *medRxiv*. Published online June 2020:2020.06.25.20140178. doi:[10.1101/2020.06.25.20140178](https://doi.org/10.1101/2020.06.25.20140178)  
8
- 9 40. Torres JP, Piñera C, De La Maza V, et al. Severe Acute Respiratory Syndrome Coronavirus 2 Antibody Prevalence in Blood in a Large School Community Subject to  
10 a Coronavirus Disease 2019 Outbreak: A Cross-sectional Study. *Clinical Infectious Diseases*. Published online July 2020:ciaa955. doi:[10.1093/cid/ciaa955](https://doi.org/10.1093/cid/ciaa955)  
11
- 12 41. Halatoko WA, KONU YR, Gbeasor-Komlanvi FA, et al. Prevalence of SARS-CoV-2 among high-risk populations in Lom&Eacute; (Togo) in 2020. *medRxiv*.  
13 Published online August 2020:2020.08.07.20163840. doi:[10.1101/2020.08.07.20163840](https://doi.org/10.1101/2020.08.07.20163840)  
14
- 15 42. Slusser S. MLB antibody study: 0.7% of those tested had been exposed to coronavirus. *San Francisco Chronicle*. Published online May 2020.  
16
- 17 43. Vince A, Zadro R, Šostar Z, et al. SARS-CoV-2 Seroprevalence in a Cohort of Asymptomatic, RT-PCR Negative Croatian First League Football Players. *medRxiv*.  
18 Published online November 2020:2020.10.30.20223230. doi:[10.1101/2020.10.30.20223230](https://doi.org/10.1101/2020.10.30.20223230)  
19
- 20 44. Mack D, Gärtner BC, Rössler A, et al. Prevalence of SARS-CoV-2 IgG antibodies in a large prospective cohort study of elite football players in Germany (May/June  
21 2020): Implications for a testing protocol in asymptomatic individuals and estimation of the rate of undetected cases. *Clinical Microbiology and Infection*.  
22 2020;27(3):473.e1-473.e4. doi:[10.1016/j.cmi.2020.11.033](https://doi.org/10.1016/j.cmi.2020.11.033)  
23
- 24 45. Khan SMS, Qurieshi MA, Haq I, et al. Seroprevalence of SARS-CoV-2 specific IgG antibodies in District Srinagar, northern India A cross-sectional study. *PLOS*  
25 *ONE*. 2020;15(11):e0239303. doi:[10.1371/journal.pone.0239303](https://doi.org/10.1371/journal.pone.0239303)  
26
- 27 46. Akinbami LJ, Vuong N, Petersen LR, et al. SARS-CoV-2 Seroprevalence among Healthcare, First Response, and Public Safety Personnel, Detroit Metropolitan Area,  
28 Michigan, USA, May/June 2020 - Volume 26, Number 12/December 2020 - Emerging Infectious Diseases journal - CDC. Published online December 2020.  
29 doi:[10.3201/eid2612.203764](https://doi.org/10.3201/eid2612.203764)  
30
- 31 47. Amendola A, Tanzi E, Folgori L, et al. Low seroprevalence of SARS-CoV-2 infection among healthcare workers of the largest children hospital in Milan during the  
32 pandemic wave. *Infection Control & Hospital Epidemiology*. Published online August 2020:1-2. doi:[10.1017/ice.2020.401](https://doi.org/10.1017/ice.2020.401)  
33
- 34 48. Paulo Arnaldo. *Inquérito Sero-Epidemiológico de SARS-CoV-2 Na Cidade de Quelimane (InCOVID 2020)*. República de Moçambique Ministério da Saúde; 2020.  
35
- 36 49. Bal A, Brengel-Pesce K, Gaymard A, et al. Clinical and microbiological assessments of COVID-19 in healthcare workers: A prospective longitudinal study. *medRxiv*.  
37 Published online November 2020:2020.11.04.20225862. doi:[10.1101/2020.11.04.20225862](https://doi.org/10.1101/2020.11.04.20225862)  
38
- 39 50. Fernández-Rivas G, Quirant-Sánchez B, González V, et al. Seroprevalence of SARS-CoV-2 IgG Specific Antibodies among Healthcare Workers in the Northern  
40 Metropolitan Area of Barcelona, Spain, after the first pandemic wave. *medRxiv*. Published online June 2020:2020.06.24.20135673. doi:[10.1101/2020.06.24.20135673](https://doi.org/10.1101/2020.06.24.20135673)  
41
- 42 51. Bardai G, Ouellet J, Engelhardt T, Bertolizio G, Wu Z, Rauch F. Prevalence of SARS-CoV-2 infections in a pediatric orthopedic hospital. von Ungern-Sternberg B,  
43 ed. *Pediatric Anesthesia*. 2021;31(2):247-248. doi:[10.1111/pan.14047](https://doi.org/10.1111/pan.14047)  
44  
45  
46  
47

- 1  
2  
3 52. Blairon L, Mokrane S, Wilmet A, et al. Large-scale, molecular and serological SARS-CoV-2 screening of healthcare workers in a 4-site public hospital in Belgium  
4 after COVID-19 outbreak. *Journal of Infection*. Published online July 2020:S0163445320305144. doi:10.1016/j.jinf.2020.07.033  
5
- 6 53. Moreno Borraz LA, Giménez López M, Carrera Lasfuentes P, et al. Prevalencia de infección por coronavirus SARS-CoV-2 en pacientes y profesionales de un hospital  
7 de media y larga estancia en España. *Revista Española de Geriatria y Gerontología*. 2020;56(2):75-80. doi:10.1016/j.regg.2020.10.005  
8
- 9 54. Brunner WM, Hirabayashi L, Krupa NL, et al. Severe acute respiratory coronavirus virus 2 (SARS-CoV-2) IgG results among healthcare workers in a rural upstate  
10 New York hospital system. *Infection Control & Hospital Epidemiology*. Published online October 2020:1-4. doi:10.1017/ice.2020.1296  
11
- 12 55. Carozzi FM, Cusi MG, Pistello M, et al. Detection of asymptomatic SARS-CoV-2 infections among healthcare workers: Results from a large-scale screening program  
13 based on rapid serological testing. *medRxiv*. Published online August 2020. doi:10.1101/2020.07.30.20149567  
14
- 15 56. Vilibic-Cavlek T, Stevanovic V, Tabain I, et al. Severe acute respiratory syndrome coronavirus 2 seroprevalence among personnel in the healthcare facilities of  
16 Croatia, 2020. *Revista da Sociedade Brasileira de Medicina Tropical*. 2020;53. doi:10.1590/0037-8682-0458-2020  
17
- 18 57. Chibwana MG, Jere KC, kamng'ona R, et al. High SARS-CoV-2 seroprevalence in Health Care Workers but relatively low numbers of deaths in urban Malawi.  
19 *medRxiv*. Published online August 2020:2020.07.30.20164970. doi:10.1101/2020.07.30.20164970  
20
- 21 58. Coffman B. New Co-Immunity Project data show COVID-19 infection among health care workers may be lower than the general population | UofL News. *UofLNews*.  
22 Published online August 2020.  
23
- 24 59. Cooper DJ, Lear S, Watson L, et al. A prospective study of risk factors associated with seroprevalence of SARS-CoV-2 antibodies in healthcare workers at a large UK  
25 teaching hospital. *medRxiv*. Published online November 2020:2020.11.03.20220699. doi:10.1101/2020.11.03.20220699  
26
- 27 60. Denyer S. Japanese firm's blanket testing of employees could serve as model. *LMT Online*. Published online June 2020.  
28
- 29 61. Dimeglio C, Herin F, Miedougé M, et al. Screening for SARS-CoV-2 antibodies among healthcare workers in a university hospital in southern France. *Journal of*  
30 *Infection*. 2020;0(0). doi:10.1016/j.jinf.2020.09.035  
31
- 32 62. Fuereder T, Berghoff AS, Heller G, et al. SARS-CoV-2 seroprevalence in oncology healthcare professionals and patients with cancer at a tertiary care centre during  
33 the COVID-19 pandemic. *ESMO Open*. 2020;5(5). doi:10.1136/esmoopen-2020-000889  
34
- 35 63. Fusco FM, Pisaturo M, Iodice V, et al. COVID-19 among healthcare workers in a specialist infectious diseases setting in Naples, Southern Italy: Results of a cross-  
36 sectional surveillance study. *Journal of Hospital Infection*. 2020;105(4):596-600. doi:10.1016/j.jhin.2020.06.021  
37
- 38 64. Geraci L. Antibody tests show just 2% exposure rate to COVID-19. *The Lancaster News*. Published online May 2020.  
39
- 40 65. Eduardo Samo Gudo. *Inquérito Sero-epidemiológico de SARS-CoV-2 na Cidade de Nampula*. República de Moçambique Ministério da Saúde; 2020:19.  
41
- 42 66. Hackner K, Errhalt P, Willheim M, et al. Diagnostic accuracy of two commercially available rapid assays for detection of IgG and IgM antibodies to SARS-CoV-2  
43 compared to ELISA in a low-prevalence population. *Research Square*. Published online August 2020. doi:10.21203/rs.3.rs-50887/v1  
44  
45  
46  
47

- 1  
2  
3 67. Haq M, Rehman A, Noor M, et al. Seroprevalence and Risk Factors of SARS CoV-2 in Health Care Workers of Tertiary-Care Hospitals in the Province of Khyber  
4 Pakhtunkhwa, Pakistan. *medRxiv*. Published online September 2020:2020.09.29.20203125. doi:[10.1101/2020.09.29.20203125](https://doi.org/10.1101/2020.09.29.20203125)  
5
- 6 68. He L, Zeng Y, Zeng C, et al. Positive Rate of Serology and RT-PCR for COVID-19 among healthcare workers during different periods in Wuhan, China. *Journal of*  
7 *Infection*. Published online August 2020. doi:[10.1016/j.jinf.2020.08.027](https://doi.org/10.1016/j.jinf.2020.08.027)  
8
- 9 69. Herzberg J, Vollmer T, Fischer B, et al. Prospective Sero-epidemiological Evaluation of SARS-CoV-2 among Health Care Workers in a German Secondary Care  
10 Hospital. *International Journal of Infectious Diseases*. 2021;102:136-143. doi:[10.1016/j.ijid.2020.10.026](https://doi.org/10.1016/j.ijid.2020.10.026)  
11
- 12 70. Jeremias A, Nguyen J, Levine J, et al. Prevalence of SARS-CoV-2 Infection Among Health Care Workers in a Tertiary Community Hospital. *JAMA Internal*  
13 *Medicine*. Published online August 2020. doi:[10.1001/jamainternmed.2020.4214](https://doi.org/10.1001/jamainternmed.2020.4214)  
14
- 15 71. Jespersen S, Mikkelsen S, Greve T, et al. Severe Acute Respiratory Syndrome Coronavirus 2 Seroprevalence Survey Among 17 971 Healthcare and Administrative  
16 Personnel at Hospitals, Prehospital Services, and Specialist Practitioners in the Central Denmark Region. *Clinical Infectious Diseases*. Published online October  
17 2020:ciaa1471. doi:[10.1093/cid/ciaa1471](https://doi.org/10.1093/cid/ciaa1471)  
18
- 19 72. Kassem AM, Talaat H, Shawky S, et al. SARS-CoV-2 infection among healthcare workers of a gastroenterological service in a tertiary care facility. *Arab Journal of*  
20 *Gastroenterology*. 2020;21(3):151-155. doi:[10.1016/j.ajg.2020.07.005](https://doi.org/10.1016/j.ajg.2020.07.005)  
21
- 22 73. Kern PM, Müller H-H, Menzel T, Weisser H. Studie zur Immunität gegen SARS-CoV-2: Keine signifikante humorale Immunität gegen SARS-CoV-2 im  
23 medizinischen Personal eines Klinikums der Maximalversorgung und in der Stadtregion Fulda. *Der Klinikarzt*. 2020;49(06):268-273. doi:[10.1055/a-1198-1243](https://doi.org/10.1055/a-1198-1243)  
24
- 25 74. Khalil A, Hill R, Wright A, Ladhani S, O'Brien P. SARS-CoV-2-Specific Antibody Detection in Healthcare Workers in a UK Maternity Hospital: Correlation With  
26 SARS-CoV-2 RT-PCR Results. *Clinical Infectious Diseases*. 2020;(ciaa893). doi:[10.1093/cid/ciaa893](https://doi.org/10.1093/cid/ciaa893)  
27
- 28 75. Kumar A, Sathyapalan D, Ramachandran A, Subhash K, Biswas L, Beena KV. SARS-CoV-2 antibodies in healthcare workers in a large university hospital, Kerala,  
29 India. *Clinical Microbiology and Infection*. 2021;27(3):481-483. doi:[10.1016/j.cmi.2020.09.013](https://doi.org/10.1016/j.cmi.2020.09.013)  
30
- 31 76. Lackermair K, William F, Grzanna N, et al. Infection with SARS-CoV-2 in primary care health care workers assessed by antibody testing. *Family Practice*. Published  
32 online August 2020:cmaa078. doi:[10.1093/fampra/cmaa078](https://doi.org/10.1093/fampra/cmaa078)  
33
- 34 77. Lahner E, Dilaghi E, Prestigiacomo C, et al. Prevalence of Sars-Cov-2 Infection in Health Workers (HWs) and Diagnostic Test Performance: The Experience of a  
35 Teaching Hospital in Central Italy. *International Journal of Environmental Research and Public Health*. 2020;17(12). doi:[10.3390/ijerph17124417](https://doi.org/10.3390/ijerph17124417)  
36
- 37 78. Liu M, Cheng S-Z, Xu K-W, et al. Use of personal protective equipment against coronavirus disease 2019 by healthcare professionals in Wuhan, China: Cross  
38 sectional study. *BMJ*. 2020;369. doi:[10.1136/bmj.m2195](https://doi.org/10.1136/bmj.m2195)  
39
- 40 79. Liu T, Wu S, Tao H, Zeng G, Zhou F, Wang X. Prevalence of IgG Antibodies to SARS-CoV-2 in Wuhan Implications for the Longevity of Antibodies Against  
41 SARS-CoV-2. *Research Square*. Published online November 2020. doi:[10.21203/rs.3.rs-99748/v1](https://doi.org/10.21203/rs.3.rs-99748/v1)  
42
- 43 80. Lorenzo D, Carrisi C. COVID-19 exposure risk for family members of healthcare workers: An observational study. *International Journal of Infectious Diseases*.  
44 2020;98:287-289. doi:[10.1016/j.ijid.2020.06.106](https://doi.org/10.1016/j.ijid.2020.06.106)  
45  
46  
47

- 1  
2  
3 81. Mussagy Mahomed. *Inquérito Sero-Epidemiológico de SARS-CoV-2 Na Cidade de Tete (InCOVID 2020)*. República de Moçambique Ministério da Saúde; 2020.
- 4  
5 82. Arlete Mahumane. *Inquérito Sero-Epidemiológico de SARS-CoV-2 Na Cidade de Chimoio (InCOVID 2020)*. República de Moçambique Ministério da Saúde; 2020.
- 6  
7 83. Majdoubi A, Michalski C, O'Connell SE, et al. Antibody reactivity to SARS-CoV-2 is common in unexposed adults and infants under 6 months. *medRxiv*. Published  
8 online November 2020:2020.10.05.20206664. doi:[10.1101/2020.10.05.20206664](https://doi.org/10.1101/2020.10.05.20206664)
- 9  
10 84. Majiya H, Aliyu-Paiko M, Balogu VT, et al. Seroprevalence of COVID-19 in Niger State. *medRxiv*. Published online August 2020. doi:[10.1101/2020.08.04.20168112](https://doi.org/10.1101/2020.08.04.20168112)
- 11  
12 85. Fill Malfertheiner S, Brandstetter S, Roth S, et al. Immune response to SARS-CoV-2 in health care workers following a COVID-19 outbreak: A prospective  
13 longitudinal study. *Journal of Clinical Virology*. 2020;130:104575. doi:[10.1016/j.jcv.2020.104575](https://doi.org/10.1016/j.jcv.2020.104575)
- 14  
15 86. Martin C, Montesinos I, Dauby N, et al. Dynamics of SARS-CoV-2 RT-PCR positivity and seroprevalence among high-risk healthcare workers and hospital staff.  
16 *Journal of Hospital Infection*. 2020;106(1):102-106. doi:[10.1016/j.jhin.2020.06.028](https://doi.org/10.1016/j.jhin.2020.06.028)
- 17  
18 87. de Melo MS, Borges LP, de Souza DRV, et al. *Anti-SARS-CoV-2 IgM and IgG Antibodies in Health Workers in Sergipe, Brazil*. *Infectious Diseases (except  
19 HIV/AIDS)*; 2020. doi:[10.1101/2020.09.24.20200873](https://doi.org/10.1101/2020.09.24.20200873)
- 20  
21 88. Morcuende M, Guglielminotti J, Landau R. Anesthesiologists' and Intensive Care Providers' Exposure to COVID-19 Infection in a New York City Academic Center:  
22 A Prospective Cohort Study Assessing Symptoms and COVID-19 Antibody Testing. *Anesthesia and analgesia*. 2020;131(3):669-676.  
doi:[10.1213/ANE.0000000000005056](https://doi.org/10.1213/ANE.0000000000005056)
- 23  
24 89. Moscola J, Sembajwe G, Jarrett M, et al. Prevalence of SARS-CoV-2 Antibodies in Health Care Personnel in the New York City Area. *JAMA*. 2020;324(9):893-895.  
25 doi:[10.1001/jama.2020.14765](https://doi.org/10.1001/jama.2020.14765)
- 26  
27 90. Nishida T, Iwahashi H, Yamauchi K, et al. Seroprevalence of SARS-CoV-2 Antibodies Among 925 Staff Members in an Urban Hospital Accepting COVID-19  
28 Patients in Osaka Prefecture, Japan. *medRxiv*. Published online January 2020:2020.09.10.20191866. doi:[10.1101/2020.09.10.20191866](https://doi.org/10.1101/2020.09.10.20191866)
- 29  
30 91. Olalla J, Correa AM, Martín-Escalante MD, et al. Search for asymptomatic carriers of SARS-CoV-2 in healthcare workers during the pandemic: A Spanish  
31 experience. *QJM: An International Journal of Medicine*. 2020;(hcaa238). doi:[10.1093/qjmed/hcaa238](https://doi.org/10.1093/qjmed/hcaa238)
- 32  
33 92. Pallett SJC, Rayment M, Patel A, et al. Point-of-care serological assays for delayed SARS-CoV-2 case identification among health-care workers in the UK: A  
34 prospective multicentre cohort study. *The Lancet Respiratory Medicine*. 2020;8(9):885-894. doi:[10.1016/S2213-2600\(20\)30315-5](https://doi.org/10.1016/S2213-2600(20)30315-5)
- 35  
36 93. Péré H, Wack M, Védie B, et al. Sequential SARS-CoV-2 IgG assays as confirmatory strategy to confirm equivocal results: Hospital-wide antibody screening in 3,569  
37 staff health care workers in Paris. *Journal of Clinical Virology*. 2020;132:104617. doi:[10.1016/j.jcv.2020.104617](https://doi.org/10.1016/j.jcv.2020.104617)
- 38  
39 94. Poulidakos D, Sinha S, Kalra PA. SARS-CoV-2 antibody screening in healthcare workers in a tertiary centre in North West England. *Journal of clinical virology : the  
40 official publication of the Pan American Society for Clinical Virology*. 2020;129:104545-104545. doi:[10.1016/j.jcv.2020.104545](https://doi.org/10.1016/j.jcv.2020.104545)
- 41  
42 95. Psychogiou M, Karabinis A, Pavlopoulou I, et al. Antibodies against SARS-CoV-2 among health care workers in a country with low burden of COVID-19. *medRxiv*.  
43 Published online June 2020. doi:[10.1101/2020.06.23.20137620](https://doi.org/10.1101/2020.06.23.20137620)
- 44  
45  
46  
47

- 1  
2  
3 96. Kolthur-Seetharam U, Shah D, Shastri J, et al. *SARS-CoV2 Serological Survey in Mumbai by NITI-BMC-TIFR: Preliminary Report of Round-2*. NITI-BMC-TIFR; 2020.
- 4  
5  
6 97. Shields AM, Faustini SE, Perez-Toledo M, et al. SARS-CoV-2 seroconversion in health care workers. *medRxiv*. Published online May 2020:2020.05.18.20105197. doi:[10.1101/2020.05.18.20105197](https://doi.org/10.1101/2020.05.18.20105197)
- 7  
8  
9 98. Ismael Amaral Silva PA, Ismael C, Marchon da Silva C, Domenge C. 1761P Universal screening of SARS-CoV-2 of oncology healthcare workers a Brazilian experience. *Annals of Oncology*. 2020;31:S1024. doi:[10.1016/j.annonc.2020.08.1825](https://doi.org/10.1016/j.annonc.2020.08.1825)
- 10  
11  
12 99. Solodky ML, Galvez C, Russias B, et al. Lower detection rates of SARS-COV2 antibodies in cancer patients versus health care workers after symptomatic COVID-19. *Annals of Oncology*. 2020;31(8):1087-1088. doi:[10.1016/j.annonc.2020.04.475](https://doi.org/10.1016/j.annonc.2020.04.475)
- 13  
14  
15 100. Soriano V, Meiriño R, Corral O, Guallar MP. Severe Acute Respiratory Syndrome Coronavirus 2 Antibodies in Adults in Madrid, Spain. *Clinical Infectious Diseases*. 2020;(ciaa769). doi:[10.1093/cid/ciaa769](https://doi.org/10.1093/cid/ciaa769)
- 16  
17 101. Istituto Nazionale di Statistica. *PRIMI RISULTATI DELL'INDAGINE DI SIEROPREVALENZA SUL SARS-CoV-2*. Istituto Nazionale di Statistica; 2020.
- 18  
19 102. Steensels D, Oris E, Coninx L, et al. Hospital-Wide SARS-CoV-2 Antibody Screening in 3056 Staff in a Tertiary Center in Belgium. *JAMA*. 2020;(7501160). doi:[10.1001/jama.2020.11160](https://doi.org/10.1001/jama.2020.11160)
- 20  
21  
22 103. Stock AD, Bader ER, Cezayirli P, et al. COVID-19 Infection Among Healthcare Workers: Serological Findings Supporting Routine Testing. *Frontiers in Medicine*. 2020;7. doi:[10.3389/fmed.2020.00471](https://doi.org/10.3389/fmed.2020.00471)
- 23  
24  
25 104. Takita M, Matsumura T, Yamamoto K, et al. Geographical Profiles of COVID-19 Outbreak in Tokyo: An Analysis of the Primary Care ClinicBased Point-of-Care Antibody Testing. *Journal of Primary Care & Community Health*. 2020;11:215013272094269. doi:[10.1177/2150132720942695](https://doi.org/10.1177/2150132720942695)
- 26  
27  
28 105. Tong X, Ning M, Huang R, et al. Surveillance of SARS-CoV-2 infection among frontline health care workers in Wuhan during COVID-19 outbreak. *Immunity, Inflammation and Disease*. 2020;8(4):840-843. doi:[10.1002/iid3.340](https://doi.org/10.1002/iid3.340)
- 29  
30  
31 106. Trieu M-C, Bansal A, Madsen A, et al. SARS-CoV-2 Specific Neutralizing Antibody Responses in Norwegian Health Care Workers After the First Wave of COVID-19 Pandemic: A Prospective Cohort Study. *The Journal of Infectious Diseases*. 2020;2021-(jiaa737). doi:[10.1093/infdis/jiaa737](https://doi.org/10.1093/infdis/jiaa737)
- 32  
33  
34 107. Tu D, Shu J, Wu X, et al. Immunological detection of serum antibodies in pediatric medical workers exposed to varying levels of SARS-CoV-2. *The Journal of Infection*. 2021;82(1):159-198. doi:[10.1016/j.jinf.2020.07.023](https://doi.org/10.1016/j.jinf.2020.07.023)
- 35  
36  
37 108. Valdivia A, Torres I, Huntley D, et al. Caveats in interpreting SARS-CoV-2 IgM+/IgG- antibody profile in asymptomatic health care workers. *Journal of Medical Virology*. 2020;n/a(n/a). doi:[10.1002/jmv.26400](https://doi.org/10.1002/jmv.26400)
- 38  
39  
40 109. Chafloque-Vasquez RA, Pampa-Espinoza L, Salinas JCC. Seroprevalence of COVID-19 in workers in a hospital in the Peruvian Amazon. *ACTA MEDICA PERUANA*. 2020;37(3). doi:[10.35663/amp.2020.373.1050](https://doi.org/10.35663/amp.2020.373.1050)
- 41  
42  
43 110. Edna Viegas. *Inquérito Sero-Epidemiológico de SARS-CoV-2 Na Cidade de Maputo (InCOVID 2020)*. República de Moçambique Ministério da Saúde; 2020.
- 44  
45  
46  
47



- 1  
2  
3 111. Vlachoyiannopoulos P, Alexopoulos H, Apostolidi I, et al. Anti-SARS-CoV-2 antibody detection in healthcare workers of two tertiary hospitals in Athens, Greece. *Clinical Immunology*. 2020;221:108619. doi:[10.1016/j.clim.2020.108619](https://doi.org/10.1016/j.clim.2020.108619)
- 4  
5  
6 112. Dalla Volta A, Valcamonico F, Pedersini R, et al. The Spread of SARS-CoV-2 Infection Among the Medical Oncology Staff of ASST Spedali Civili of Brescia: Efficacy of Preventive Measures. *Frontiers in Oncology*. 2020;10:1574. doi:[10.3389/fonc.2020.01574](https://doi.org/10.3389/fonc.2020.01574)
- 7  
8  
9 113. Ward H, Cooke G, Atchison C, et al. Declining prevalence of antibody positivity to SARS-CoV-2: A community study of 365,000 adults. *medRxiv*. Published online October 2020:2020.10.26.20219725. doi:[10.1101/2020.10.26.20219725](https://doi.org/10.1101/2020.10.26.20219725)
- 10  
11  
12 114. Xiong S, Guo C, Dittmer U, Zheng X, Wang B. The prevalence of antibodies to SARS-CoV-2 in asymptomatic healthcare workers with intensive exposure to COVID-19. *medRxiv*. Published online June 2020:2020.05.28.20110767. doi:[10.1101/2020.05.28.20110767](https://doi.org/10.1101/2020.05.28.20110767)
- 13  
14  
15 115. Zhang J, Liu J, Li N, et al. Serological detection of 2019-nCoV respond to the epidemic: A useful complement to nucleic acid testing. *medRxiv*. Published online March 2020:2020.03.04.20030916. doi:[10.1101/2020.03.04.20030916](https://doi.org/10.1101/2020.03.04.20030916)
- 16  
17  
18 116. Zhao D, Wang M, Wang M, et al. Asymptomatic infection by SARS-CoV-2 in healthcare workers: A study in a large teaching hospital in Wuhan, China. *International Journal of Infectious Diseases*. 2020;99:219-225. doi:[10.1016/j.ijid.2020.07.082](https://doi.org/10.1016/j.ijid.2020.07.082)
- 19  
20  
21 117. Ahmad K, Rezvanizadeh V, Dahal S, et al. COVID-19 IgG/IgM antibody testing in Los Angeles County, California. *European Journal of Clinical Microbiology & Infectious Diseases*. Published online November 2020. doi:[10.1007/s10096-020-04111-3](https://doi.org/10.1007/s10096-020-04111-3)
- 22  
23  
24 118. Halbrook M, Gadoth A, Martin-Blais R, et al. Incidence of SARS-CoV-2 infection among asymptomatic frontline health workers in Los Angeles County, California. *medRxiv*. Published online November 2020:2020.11.18.20234211. doi:[10.1101/2020.11.18.20234211](https://doi.org/10.1101/2020.11.18.20234211)
- 25  
26  
27 119. Iwuji K, Islam E, Berdine G, Nugent K, Test V, Tijerina A. Prevalence of Coronavirus Antibody Among First Responders in Lubbock, Texas. *Journal of Primary Care & Community Health*. 11:2150132720971390. doi:[10.1177/2150132720971390](https://doi.org/10.1177/2150132720971390)
- 28  
29  
30 120. Parker-Magyar A. Few among Long Hill first responders test positive for COVID-19 antibodies. *Echoes Sentinel*. Published online June 2020.
- 31  
32  
33 121. Caban-Martinez AJ, Schaefer-Solle N, Santiago K, et al. Epidemiology of SARS-CoV-2 antibodies among firefighters/paramedics of a US fire department: A cross-sectional study. *Occupational and Environmental Medicine*. 2020;77(12):857-861. doi:[10.1136/oemed-2020-106676](https://doi.org/10.1136/oemed-2020-106676)
- 34  
35  
36 122. Staletovich J. South Florida Cities Begin Testing Employees For COVID-19 Antibodies. *WLRN*. Published online May 2020.
- 37  
38  
39 123. Hibino M, Iwabuchi S, Munakata H. SARS-CoV-2 IgG seroprevalence among medical staff in a general hospital that treated patients with COVID-19 in Japan: Retrospective evaluation of nosocomial infection control. *Journal of Hospital Infection*. 2020;107:103-104. doi:[10.1016/j.jhin.2020.10.001](https://doi.org/10.1016/j.jhin.2020.10.001)
- 40  
41  
42 124. Calcagno A, Ghisetti V, Emanuele T, et al. Risk for SARS-CoV-2 Infection in Healthcare Workers, Turin, Italy. *Emerging Infectious Diseases*. 2021;27(1):303-305. doi:[10.3201/eid2701.203027](https://doi.org/10.3201/eid2701.203027)
- 43  
44  
45 125. Alharbi SA, Almutairi AZ, Jan AA, Alkhalify AM. Enzyme-Linked Immunosorbent Assay for the Detection of Severe Acute Respiratory Syndrome Coronavirus 2 (SARS-CoV-2) IgM/IgA and IgG Antibodies Among Healthcare Workers. *Cureus*. Published online September 2020. doi:[10.7759/cureus.10285](https://doi.org/10.7759/cureus.10285)
- 46  
47

- 1  
2  
3 126. Chau NVV, Toan LM, Man DNH, et al. Absence of SARS-CoV-2 antibodies in health care workers of a tertiary referral hospital for COVID-19 in southern  
4 Vietnam. *Journal of Infection*. 2020;82(1):e36-e37. doi:[10.1016/j.jinf.2020.11.018](https://doi.org/10.1016/j.jinf.2020.11.018)  
5
- 6 127. Khan MS, Haq I, Qurieshi MA, et al. SARS-CoV-2 seroprevalence in healthcare workers of dedicated-COVID hospitals and nonCOVID hospitals of District  
7 Srinagar, Kashmir. *medRxiv*. Published online October 2020:2020.10.23.20218164. doi:[10.1101/2020.10.23.20218164](https://doi.org/10.1101/2020.10.23.20218164)  
8
- 9 128. Costa SF, Giavina-Bianchi P, Buss L, et al. SARS-CoV-2 seroprevalence and risk factors among oligo/asymptomatic healthcare workers(HCW): Estimating the  
10 impact of community transmission. *Clinical Infectious Diseases*. 2020;(c1aa1845). doi:[10.1093/cid/ciaa1845](https://doi.org/10.1093/cid/ciaa1845)  
11
- 12 129. Mohr N, Harland K, Krishnadasan A, Santibanez S, Talan D. Diagnosed and Undiagnosed COVID-19 in US Emergency Department Health Care Personnel: A  
13 Cross-sectional Analysis. *Annals of Emergency Medicine*. Published online December 2020. doi:[10.1016/j.annemergmed.2020.12.007](https://doi.org/10.1016/j.annemergmed.2020.12.007)  
14
- 15 130. Noor M, Haq M, Ul Haq N, et al. Does Working in a COVID-19 Receiving Health Facility Influence Seroprevalence to SARS-CoV-2? *Cureus*. Published online  
16 November 2020. doi:[10.7759/cureus.11389](https://doi.org/10.7759/cureus.11389)  
17
- 18 131. Singhal T, Shah S, Naik R, Kazi A, Thakkar P. Prevalence of COVID-19 Antibodies in Healthcare Workers at the Peak of the Pandemic in Mumbai, India: A  
19 Preliminary Study. *Indian Journal of Medical Microbiology*. 2020;38(3):461-463. doi:[10.4103/ijmm.IJMM\\_20\\_308](https://doi.org/10.4103/ijmm.IJMM_20_308)  
20
- 21 132. Dacosta-Urbieta A, Rivero-Calle I, Pardo-Seco J, et al. Seroprevalence of SARS-CoV-2 Among Pediatric Healthcare Workers in Spain. *Frontiers in Pediatrics*.  
22 2020;8. doi:[10.3389/fped.2020.00547](https://doi.org/10.3389/fped.2020.00547)  
23
- 24 133. Sartore-Bianchi A, Patelli G, Tosi F, et al. INCIDENCE OF SARS-COV-2 INFECTION IN PATIENTS WITH ACTIVE CANCER: MONO-INSTITUTIONAL  
25 SERIES OF A COMPREHENSIVE CANCER INSTITUTION IN LOMBARDY DURING THE COVID-19 PANDEMIC (NIGUARDA CANCER CENTER, MILANO,  
26 ITALY). In: *Tumori Journal*. Vol 106. AIOM Abstracts.; 2020:1-215. doi:[10.1177/0300891620953388](https://doi.org/10.1177/0300891620953388)  
27
- 28 134. Brousseau N, Morin L, Ouakki M, et al. *COVID-19 : Étude de séroprévalence chez des travailleurs de la santé de centres hospitaliers au Québec*. Institut National  
29 de Sante Publique du Quebec; 2020:20.  
30
- 31 135. Chen Y, Tong X, Wang J, et al. High SARS-CoV-2 antibody prevalence among healthcare workers exposed to COVID-19 patients. *The Journal of Infection*.  
32 2020;81(3):420-426. doi:[10.1016/j.jinf.2020.05.067](https://doi.org/10.1016/j.jinf.2020.05.067)  
33
- 34 136. Favara DM, Cooke A, Doffinger R, McAdam K, Corrie P, Ainsworth NL. COVID-19 Serology in Oncology Staff Study: Understanding SARS-CoV-2 in the  
35 Oncology Workforce. *Clinical Oncology (Royal College of Radiologists (Great Britain))*. 2021;33(1):e61-e63. doi:[10.1016/j.clon.2020.07.015](https://doi.org/10.1016/j.clon.2020.07.015)  
36
- 37 137. Fujita K, Shinpei Kada, Osamu Kanai, et al. Quantitative SARS-CoV-2 antibody screening of healthcare workers in the southern part of Kyoto city during the  
38 COVID-19 peri-pandemic period. *medRxiv*. Published online May 2020.  
39
- 40 138. Godbout EJ, Pryor R, Harmon M, et al. Severe acute respiratory coronavirus virus 2 (SARS-CoV-2) seroprevalence among healthcare workers in a low prevalence  
41 region. *Infection Control & Hospital Epidemiology*. Published online December 2020:1-3. doi:[10.1017/ice.2020.1374](https://doi.org/10.1017/ice.2020.1374)  
42
- 43 139. Houlihan CF, Vora N, Byrne T, et al. Pandemic peak SARS-CoV-2 infection and seroconversion rates in London frontline health-care workers. *The Lancet*.  
44 2020;396(10246):e6-e7. doi:[10.1016/S0140-6736\(20\)31484-7](https://doi.org/10.1016/S0140-6736(20)31484-7)  
45  
46  
47

- 1  
2  
3 140. Insúa C, Stedile G, Figueroa V, et al. Seroprevalence of SARS-CoV-2 antibodies among physicians from a children's hospital. *Archivos Argentinos De Pediatría*.  
4 2020;118(6):381-385. doi:[10.5546/aap.2020.eng.381](https://doi.org/10.5546/aap.2020.eng.381)  
5
- 6 141. Kohler PP, Kahlert CR, Sumer J, et al. Prevalence of SARS-CoV-2 antibodies among Swiss hospital workers: Results of a prospective cohort study. *Infection*  
7 *Control & Hospital Epidemiology*. Published online October 2020:1-5. doi:[10.1017/ice.2020.1244](https://doi.org/10.1017/ice.2020.1244)  
8
- 9 142. Kumar N, Bhartiya S, Singh T. Duration of anti-SARS-CoV-2 antibodies much shorter in India. *Vaccine*. 2021;39(6):886-888. doi:[10.1016/j.vaccine.2020.10.094](https://doi.org/10.1016/j.vaccine.2020.10.094)  
10
- 11 143. Mesnil M, Joubel K, Yavchitz A, Miklaszewski N, Devys J-M. Seroprevalence of SARS-Cov-2 in 646 professionals at the Rothschild Foundation Hospital  
12 (ProSeCoV study). *Anaesthesia Critical Care & Pain Medicine*. 2020;39(5):595-596. doi:[10.1016/j.accpm.2020.08.003](https://doi.org/10.1016/j.accpm.2020.08.003)  
13
- 14 144. Missaglia R, Belingheri M, Antolini L, et al. SARS-CoV-2 pandemia in Lombardy: The impact on family Paediatricians. *Italian Journal of Pediatrics*.  
15 2020;46(1):184. doi:[10.1186/s13052-020-00950-0](https://doi.org/10.1186/s13052-020-00950-0)  
16
- 17 145. Orth-Höller D, Eigentler A, Weseslindtner L, Möst J. Antibody kinetics in primary- and secondary-care physicians with mild to moderate SARS-CoV-2 infection.  
18 *Emerging Microbes & Infections*. 2020;9(1):1692-1694. doi:[10.1080/22221751.2020.1793690](https://doi.org/10.1080/22221751.2020.1793690)  
19
- 20 146. Plebani M, Padoan A, Fedeli U, et al. SARS-CoV-2 serosurvey in health care workers of the Veneto Region. *Clinical Chemistry and Laboratory Medicine (CCLM)*.  
21 2020;58(12):2107-2111. doi:[10.1515/cclm-2020-1236](https://doi.org/10.1515/cclm-2020-1236)  
22
- 23 147. Rudberg A-S, Havervall S, Månberg A, et al. SARS-CoV-2 exposure, symptoms and seroprevalence in healthcare workers in Sweden. *Nature Communications*.  
24 2020;11(1):5064. doi:[10.1038/s41467-020-18848-0](https://doi.org/10.1038/s41467-020-18848-0)  
25
- 26 148. Schmidt SB, Grüter L, Boltzmann M, Rollnik JD. Prevalence of serum IgG antibodies against SARS-CoV-2 among clinic staff. Adrish M, ed. *PLOS ONE*.  
27 2020;15(6):e0235417. doi:[10.1371/journal.pone.0235417](https://doi.org/10.1371/journal.pone.0235417)  
28
- 29 149. Sotgiu G, Barassi A, Miozzo M, et al. SARS-CoV-2 specific serological pattern in healthcare workers of an Italian COVID-19 forefront hospital. *BMC Pulmonary*  
30 *Medicine*. 2020;20(1):203. doi:[10.1186/s12890-020-01237-0](https://doi.org/10.1186/s12890-020-01237-0)  
31
- 32 150. Venugopal U, Jilani N, Rabah S, et al. SARS-CoV-2 seroprevalence among health care workers in a New York City hospital: A cross-sectional analysis during the  
33 COVID-19 pandemic. *International Journal of Infectious Diseases*. 2020;102:63-69. doi:[10.1016/j.ijid.2020.10.036](https://doi.org/10.1016/j.ijid.2020.10.036)  
34
- 35 151. Racine-Brzostek SE, Yang HS, Chadburn A, et al. COVID-19 Viral and Serology Testing in New York City Health Care Workers. *American Journal of Clinical*  
36 *Pathology*. 2020;154(5):592-595. doi:[10.1093/ajcp/aaqaa142](https://doi.org/10.1093/ajcp/aaqaa142)  
37
- 38 152. Hoffmann S, Spallek J, Heinz-Detlef G, Schiebel J, Hufert F. Testing the backbone of the healthcare system: A prospective serological-epidemiological cohort study  
39 of healthcare workers in rural Germany. Published online September 2020. doi:[10.21203/rs.3.rs-84703/v1](https://doi.org/10.21203/rs.3.rs-84703/v1)  
40
- 41 153. Patel MM, Thornburg NJ, Stubblefield WB, et al. Change in Antibodies to SARS-CoV-2 Over 60 Days Among Health Care Personnel in Nashville, Tennessee.  
42 *JAMA*. 2020;324(17):1781. doi:[10.1001/jama.2020.18796](https://doi.org/10.1001/jama.2020.18796)  
43  
44  
45  
46  
47



- 1  
2  
3 154. Self WH, Tenforde MW, Stubblefield WB, et al. Seroprevalence of SARS-CoV-2 Among Frontline Health Care Personnel in a Multistate Hospital Network 13  
4 Academic Medical Centers, April-June 2020. *MMWR Morbidity and Mortality Weekly Report*. 2020;69(35):1221-1226. doi:[10.15585/mmwr.mm6935e2](https://doi.org/10.15585/mmwr.mm6935e2)  
5
- 6 155. Shah VP, Hainy CM, Swift MD, Breeher LE, Theel ES, Sampathkumar P. Unrecognized severe acute respiratory coronavirus virus 2 (SARS-CoV-2) seroprevalence  
7 among healthcare personnel in a low-prevalence area. *Infection Control & Hospital Epidemiology*. Published online November 2020:1-3. doi:[10.1017/ice.2020.1341](https://doi.org/10.1017/ice.2020.1341)  
8
- 9 156. Bampoe S, Lucas DN, Neall G, et al. A cross-sectional study of immune seroconversion to SARS-CoV-2 in front-line maternity health professionals. *medRxiv*.  
10 Published online June 2020. doi:[10.1101/2020.06.24.20139352](https://doi.org/10.1101/2020.06.24.20139352)  
11
- 12 157. Dimcheff DE, Schildhouse RJ, Hausman MS, et al. Seroprevalence of severe acute respiratory syndrome coronavirus-2 (SARS-CoV-2) infection among Veterans  
13 Affairs healthcare system employees suggests higher risk of infection when exposed to SARS-CoV-2 outside the work environment. *Infection Control & Hospital  
14 Epidemiology*.:1-7. doi:[10.1017/ice.2020.1220](https://doi.org/10.1017/ice.2020.1220)  
15
- 16 158. Finkenzeller T, Faltlhauser A, Dietl K-H, et al. SARS-CoV-2-Antikörper bei Intensiv- und Klinikpersonal. *Medizinische Klinik - Intensivmedizin und Notfallmedizin*.  
17 2020;115(3):139-145. doi:[10.1007/s00063-020-00761-5](https://doi.org/10.1007/s00063-020-00761-5)  
18
- 19 159. Grant JJ, Wilmore SMS, McCann NS, et al. Seroprevalence of SARS-CoV-2 antibodies in healthcare workers at a London NHS Trust. *Infection Control & Hospital  
20 Epidemiology*. Published online August 2020:1-3. doi:[10.1017/ice.2020.402](https://doi.org/10.1017/ice.2020.402)  
21
- 22 160. Mansour M, Leven E, Muellers K, Stone K, Mendu DR, Wajnberg A. Prevalence of SARS-CoV-2 Antibodies Among Healthcare Workers at a Tertiary Academic  
23 Hospital in New York City. *Journal of General Internal Medicine*. 2020;35(8):2485-2486. doi:[10.1007/s11606-020-05926-8](https://doi.org/10.1007/s11606-020-05926-8)  
24
- 25 161. Martín V, Fernández-Villa T, Lamuedra Gil de Gomez M, et al. Prevalence of SARS-CoV-2 infection in general practitioners and nurses in primary care and nursing  
26 homes in the Healthcare Area of León and associated factors. *COVID19 en Atención Primaria*. 2020;46:35-39. doi:[10.1016/j.semerg.2020.05.014](https://doi.org/10.1016/j.semerg.2020.05.014)  
27
- 28 162. Meissner EG, Litwin C, Crocker T, Mack E, Card L. 460. Point-of-Care, In-Home SARS-CoV-2 IgG Antibody Testing to Assess Seroprevalence in At-Risk Health  
29 Care Workers. *Open Forum Infectious Diseases*. 2020;7(Supplement\_1):S297-S297. doi:[10.1093/ofid/ofaa439.653](https://doi.org/10.1093/ofid/ofaa439.653)  
30
- 31 163. Mostafa A, Kandil S, El-Sayed MH, et al. Universal COVID-19 screening of 4040 health care workers in a resource-limited setting: An Egyptian pilot model in a  
32 university with 12 public hospitals and medical centers. *International Journal of Epidemiology*. 2020;(dyaa173). doi:[10.1093/ije/dyaa173](https://doi.org/10.1093/ije/dyaa173)  
33
- 34 164. Paradiso AV, Summa simona D, Silvestris N, et al. COVID-19 SCREENING AND MONITORING OF ASYMPTOMATIC HEALTH WORKERS WITH A  
35 RAPID SEROLOGICAL TEST. *medRxiv*. Published online May 2020:2020.05.05.20086017. doi:[10.1101/2020.05.05.20086017](https://doi.org/10.1101/2020.05.05.20086017)  
36
- 37 165. Sydney ER, Kishore P, Laniado I, Rucker LM, Bajaj K, Zinaman MJ. Antibody evidence of SARS-CoV-2 infection in healthcare workers in the Bronx. *Infection  
38 Control & Hospital Epidemiology*. 2020;41(11):1348-1349. doi:[10.1017/ice.2020.437](https://doi.org/10.1017/ice.2020.437)  
39
- 40 166. Zhou F, Li J, Lu M, et al. Tracing asymptomatic SARS-CoV-2 carriers among 3674 hospital staff:A cross-sectional survey. *EClinicalMedicine*. 2020;26.  
41 doi:[10.1016/j.eclinm.2020.100510](https://doi.org/10.1016/j.eclinm.2020.100510)  
42
- 43 167. Buntinx F, Claes P, Gulikers M, et al. Added value of anti-SARS-CoV-2 antibody testing in a Flemish nursing home during an acute COVID-19 outbreak in April  
44 2020. *Acta Clinica Belgica*. 2020;0(0):1-6. doi:[10.1080/17843286.2020.1834285](https://doi.org/10.1080/17843286.2020.1834285)  
45  
46  
47

- 1  
2  
3 168. Reuben J, Sherman A, Ellison JA, et al. SARS-CoV-2 Seroprevalence among First Responders in the District of Columbia, May July 2020. *medRxiv*. Published  
4 online November 2020:2020.11.25.20225490. doi:[10.1101/2020.11.25.20225490](https://doi.org/10.1101/2020.11.25.20225490)  
5
- 6 169. Saberian P, Mireskandari SM, Baratloo A, et al. Antibody Rapid Test Results in Emergency Medical Services Personnel during COVID-19 Pandemic; a Cross  
7 Sectional study. *Archives of Academic Emergency Medicine*. 2020;9(1).
- 8  
9 170. Tarabichi Y, Watts B, Collins T, et al. SARS-CoV-2 Infection among Serially Tested Emergency Medical Services Workers. *Prehospital Emergency Care*.  
10 2020;0(0):1-7. doi:[10.1080/10903127.2020.1831668](https://doi.org/10.1080/10903127.2020.1831668)
- 11  
12 171. Vijh R, Ghafari C, Hayden A, et al. Serological survey following SARS-COV-2 outbreaks at long-term care facilities in metro Vancouver, British Columbia:  
13 Implications for outbreak management and infection control policies. *American Journal of Infection Control*. Published online October 2020.  
14 doi:[10.1016/j.ajic.2020.10.009](https://doi.org/10.1016/j.ajic.2020.10.009)
- 15  
16 172. Bhattacharya D, Winnett A, Fulcher JA, et al. 70. Lack of SARS-CoV-2 Antibody Seroconversion After Prompt Identification and Cohorting of Sentinel sars-cov-2-  
17 positive Residents in a Skilled Nursing Facility. *Open Forum Infectious Diseases*. 2020;7(Supplement\_1):S165-S166. doi:[10.1093/ofid/ofaa439.380](https://doi.org/10.1093/ofid/ofaa439.380)
- 18  
19 173. Pérez-García F, Pérez-Zapata A, Arcos N, et al. Severe acute respiratory coronavirus virus 2 (SARS-CoV-2) infection among hospital workers in a severely affected  
20 institution in Madrid, Spain: A surveillance cross-sectional study. *Infection Control & Hospital Epidemiology*. Published online October 2020:1-7.  
21 doi:[10.1017/ice.2020.1303](https://doi.org/10.1017/ice.2020.1303)
- 22  
23 174. Pérez-García F, Pérez-Zapata A, Arcos N, et al. Severe acute respiratory coronavirus virus 2 (SARS-CoV-2) infection among hospital workers in a severely affected  
24 institution in Madrid, Spain: A surveillance cross-sectional study. *Infection Control & Hospital Epidemiology*. 2021;42(7):803-809. doi:[10.1017/ice.2020.1303](https://doi.org/10.1017/ice.2020.1303)
- 25  
26 175. Mughal MS, Kaur IP, Patton CD, Mikhail NH, Vareechon C, Granet KM. The prevalence of severe acute respiratory coronavirus virus 2 (SARS-CoV-2) IgG  
27 antibodies in intensive care unit (ICU) healthcare personnel (HCP) and its implications a single-center, prospective, pilot study. *Infection Control & Hospital  
28 Epidemiology*. Published online June 2020:1-2. doi:[10.1017/ice.2020.298](https://doi.org/10.1017/ice.2020.298)
- 29  
30 176. Rao S. Covid-19: Jayadeva says its survey hints at herd immunity. *The Times of India*. Published online June 2020.
- 31  
32 177. Shukla V, Lau CSM, Towns M, et al. COVID-19 Exposure Among First Responders in Arizona. *Journal of Occupational and Environmental Medicine*.  
33 2020;62(12).
- 34  
35 178. Gray A. Prevalence Of COVID-19 Antibodies In Washoe Co. Expected To Be Low. *KUNR*. Published online June 2020.
- 36  
37 179. Chughtai O, Batoool H, Khan M, Chughtai A. Frequency of COVID-19 IgG Antibodies among Special Police Squad Lahore, Pakistan. *Journal of the College of  
38 Physicians and Surgeons Pakistan*. 2020;30(7):735-739. doi:[10.29271/jcpsp.2020.07.735](https://doi.org/10.29271/jcpsp.2020.07.735)
- 39  
40 180. Gujski M, Jankowski M, Pinkas J, et al. Prevalence of Current and Past SARS-CoV-2 Infections among Police Employees in Poland, June/July 2020. *Journal of  
41 Clinical Medicine*. 2020;9(10):3245. doi:[10.3390/jcm9103245](https://doi.org/10.3390/jcm9103245)
- 42  
43 181. Jerónimo Langa. *Inquérito Sero-Epidemiológico de SARS-CoV-2 Na Cidade de Lichinga (InCOVID 2020)*. República de Moçambique Ministério da Saúde; 2020.
- 44  
45  
46  
47

- 1  
2  
3 182. Ivalda Macicame. *Inquérito Sero-Epidemiológico de SARS-CoV-2 Na Província de Maputo (InCOVID 2020)*. República de Moçambique Ministério da Saúde; 2020.  
4  
5 183. Al-Thani MH, Farag E, Bertollini R, et al. Seroprevalence of SARS-CoV-2 infection in the craft and manual worker population of Qatar. *medRxiv*. Published online  
6 November 2020:2020.11.24.20237719. doi:[10.1101/2020.11.24.20237719](https://doi.org/10.1101/2020.11.24.20237719)  
7  
8 184. Epstude J, Harsch IA. Seroprevalence of COVID-19 antibodies in the cleaning and oncological staff of a municipal clinic. *GMS Hygiene and Infection Control*;  
9 *15:Doc18*. Published online July 2020. doi:[10.3205/DGKH000353](https://doi.org/10.3205/DGKH000353)  
10  
11 185. Hassan SS, Seigerud Å, Mühr LSA, et al. SARS-CoV-2 infections among personnel providing home care services for the elderly in Stockholm, Sweden. *medRxiv*.  
12 Published online December 2020. doi:[10.1101/2020.12.18.20248511](https://doi.org/10.1101/2020.12.18.20248511)  
13  
14 186. Ladhani SN, Jeffery-Smith A, Patel M, et al. High prevalence of SARS-CoV-2 antibodies in care homes affected by COVID-19: Prospective cohort study, England.  
15 *EClinicalMedicine*. 2020;28. doi:[10.1016/j.eclinm.2020.100597](https://doi.org/10.1016/j.eclinm.2020.100597)  
16  
17 187. Lindahl JF, Hoffman T, Esmailzadeh M, et al. High seroprevalence of SARS-CoV-2 in elderly care employees in Sweden. *Infection Ecology & Epidemiology*.  
18 2020;10(1):1789036. doi:[10.1080/20008686.2020.1789036](https://doi.org/10.1080/20008686.2020.1789036)  
19  
20 188. Regan T. Fellowship Village Benefits from Covid-19 Antibody Tests. *Senior Housing News*. Published online June 2020.  
21  
22 189. Alali WQ, Bastaki H, Longenecker JC, et al. Seroprevalence of SARS-CoV-2 in migrant workers in Kuwait. *Journal of Travel Medicine*. 2020;(taaa223).  
23 doi:[10.1093/jtm/taaa223](https://doi.org/10.1093/jtm/taaa223)  
24  
25 190. Addetia A, Crawford KHD, Dingens A, et al. Neutralizing Antibodies Correlate with Protection from SARS-CoV-2 in Humans during a Fishery Vessel Outbreak  
26 with a High Attack Rate. McAdam AJ, ed. *Journal of Clinical Microbiology*. 2020;58(11):e02107-20, /jcm/58/11/JCM.02107-20.atom. doi:[10.1128/JCM.02107-20](https://doi.org/10.1128/JCM.02107-20)  
27  
28 191. Picon RV, Carreno I, da Silva AA, et al. Coronavirus disease 2019 population-based prevalence, risk factors, hospitalization, and fatality rates in southern Brazil.  
29 *International Journal of Infectious Diseases*. 2020;100:402-410. doi:[10.1016/j.ijid.2020.09.028](https://doi.org/10.1016/j.ijid.2020.09.028)  
30  
31 192. D B, L B, P T, Pa P, A B, U L. Effectiveness of the measures aimed at containing Sars-cov-2 virus spreading in work settings: A survey in companies based in the  
32 Veneto region of Italy. *La Medicina del lavoro*. Published online October 2020. doi:[10.23749/mdl.v11i5.10037](https://doi.org/10.23749/mdl.v11i5.10037)  
33  
34 193. Xu X, Sun J, Nie S, et al. Seroprevalence of immunoglobulin M and G antibodies against SARS-CoV-2 in China. *Nature Medicine*. 2020;26(8):1193-1195.  
35 doi:[10.1038/s41591-020-0949-6](https://doi.org/10.1038/s41591-020-0949-6)  
36  
37 194. Chamie G, Marquez C, Crawford E, et al. Community Transmission of Severe Acute Respiratory Syndrome Coronavirus 2 Disproportionately Affects the Latinx  
38 Population During Shelter-in-Place in San Francisco. *Clinical Infectious Diseases*. Published online August 2020:ciaa1234. doi:[10.1093/cid/ciaa1234](https://doi.org/10.1093/cid/ciaa1234)  
39  
40 195. McLaughlin C, Doll MK, Morrison KT, et al. High Community SARS-CoV-2 Antibody Seroprevalence in a Ski Resort Community, Blaine County, Idaho, US.  
41 Preliminary Results. *medRxiv*. Published online July 2020. doi:[10.1101/2020.07.19.20157198](https://doi.org/10.1101/2020.07.19.20157198)  
42  
43 196. Muñoz L, Pífano M, Bolzán A, et al. *Surveillance and Seroprevalence: Evaluation of IgG Antibodies for SARS-Cov2 by ELISA in the Popular Neighborhood Villa*  
44 *Azul, Quilmes, Province of Buenos Aires, Argentina.*; 2020. doi:[10.1590/SciELOPreprints.1147](https://doi.org/10.1590/SciELOPreprints.1147)  
45  
46  
47

1  
2  
3  
4 **Supplementary File 2.**  
5

6 **Modified Joanna Briggs Institute Tool for assessing study risk of bias<sup>1</sup>**  
7  
8

9

| <b>Item 1: Was the sample frame appropriate to address the target population?</b> |                                                                                                                                                                                                                                                                                                                                                                                                                                                                                                                                                                                                                                                                                                                                                                                         |
|-----------------------------------------------------------------------------------|-----------------------------------------------------------------------------------------------------------------------------------------------------------------------------------------------------------------------------------------------------------------------------------------------------------------------------------------------------------------------------------------------------------------------------------------------------------------------------------------------------------------------------------------------------------------------------------------------------------------------------------------------------------------------------------------------------------------------------------------------------------------------------------------|
| Yes                                                                               | Sample frame described and it approximated the target population                                                                                                                                                                                                                                                                                                                                                                                                                                                                                                                                                                                                                                                                                                                        |
| No                                                                                | Sample frame did not approximate the target population (e.g., blood donors do not represent general population, doctors do not represent all health care providers)                                                                                                                                                                                                                                                                                                                                                                                                                                                                                                                                                                                                                     |
| Exclude                                                                           | Sample frame not described                                                                                                                                                                                                                                                                                                                                                                                                                                                                                                                                                                                                                                                                                                                                                              |
| *Notes                                                                            | The term “target population” should not be taken to infer every individual from everywhere or with similar disease or exposure characteristics. Instead, give consideration to specific population characteristics in the study, including age range, gender, morbidities, medications, and other potentially influential factors. For example, a sample frame may not be appropriate to address the target population if a certain group has been used (such as those working for one organisation, or one profession) and the results then inferred to the target population (i.e. working adults). A sample frame may be appropriate when it includes almost all the members of the target population (i.e. a census, or a complete list of participants or complete registry data). |

10  
11  
12  
13  
14  
15  
16  
17  
18  
19  
20  
21  
22  
23  
24  
25  
26  
27  
28  
29  
30  
31  
32  
33

34  
35

| <b>Item 2: Were study participants recruited in an appropriate way?</b> |                                                                                                            |
|-------------------------------------------------------------------------|------------------------------------------------------------------------------------------------------------|
| Yes                                                                     | Probability sampling method (simple or stratified random) or entire sample (e.g., an entire town) was used |
| No                                                                      | Non-probability sampling                                                                                   |
| Exclude                                                                 | Sampling method not reported                                                                               |

36  
37  
38  
39  
40  
41  
42  
43  
44  
45  
46

47  
48

| <b>Item 3: Was the sample size adequate?</b> |            |
|----------------------------------------------|------------|
| Yes                                          | $\geq 599$ |
| No                                           | $< 599$    |

49  
50  
51  
52  
53  
54  
55  
56

|         |                                                                                                                                                                                                                                                                                                                                                                                                                                                                                                                                                                                                                                                                                                                                                                                                                                |
|---------|--------------------------------------------------------------------------------------------------------------------------------------------------------------------------------------------------------------------------------------------------------------------------------------------------------------------------------------------------------------------------------------------------------------------------------------------------------------------------------------------------------------------------------------------------------------------------------------------------------------------------------------------------------------------------------------------------------------------------------------------------------------------------------------------------------------------------------|
| Exclude | Sample size not reported                                                                                                                                                                                                                                                                                                                                                                                                                                                                                                                                                                                                                                                                                                                                                                                                       |
| *Notes  | <p>To calculate the required sample size we used an assumed prevalence of 2.5%, which was the global average estimated by the WHO in April, 2020.<sup>2</sup> Based on guidance by the Joanna Briggs Institute and published medical statistical recommendations we selected a precision value that was half the assumed prevalence (1.25%).<sup>1,3</sup> We calculated a minimum sample size of 599 using these inputs:</p> <p>Sample size calculation:</p> $n = Z^2 P(1-P)/d^2$ <p>Where n = sample size;<br/> Z = Z statistic for level of confidence (95%);<br/> P = expected prevalence (2.5% WHO global estimate);<br/> d = precision (1.25%)</p> <p>In cases where the sample size calculation was provided and the required sample for 80% power was below our threshold (n&lt;599), this item was marked as yes.</p> |

| <b>Item 4: Were the study subjects and setting described in detail?</b> |                                                                                      |
|-------------------------------------------------------------------------|--------------------------------------------------------------------------------------|
| Yes                                                                     | Average age and distribution of gender/sex provided                                  |
| No                                                                      | Neither age or gender/sex is provided, or only one of age and gender/sex is provided |

| <b>Item 5: Was data analysis conducted with sufficient coverage of the identified sample?</b> |                                                                                                                                      |
|-----------------------------------------------------------------------------------------------|--------------------------------------------------------------------------------------------------------------------------------------|
| Yes                                                                                           | The demographic characteristics (gender/sex, age, and ethnicity) of the sample is at least somewhat representative of the population |
| No                                                                                            | The demographic characteristics (gender/sex, age, and ethnicity) of the sample is not representative of the population               |
| Unclear                                                                                       | Information is not provided about demographic characteristics of the sample (gender/sex, age, and ethnicity)                         |

**Item 6: Were valid methods used for the identification of the condition?**

|         |                                                                                                                                                                                               |
|---------|-----------------------------------------------------------------------------------------------------------------------------------------------------------------------------------------------|
| Yes     | The test used met the FDA standards for Emergency Use Authorizations for COVID-19 serological tests: sensitivity minimum 90%, specificity minimum 95%, as reported in the study. <sup>4</sup> |
| No      | The test used did not meet the FDA standards for Emergency Use Authorizations for COVID-19 serological tests: sensitivity minimum 90%, specificity minimum 95%.                               |
| Exclude | Test sensitivity and specificity not reported                                                                                                                                                 |

**Item 7: Was the condition measured in a standard, reliable way for all participants?**

|         |                                                                                 |
|---------|---------------------------------------------------------------------------------|
| Yes     | The same serology test was used for all participants                            |
| No      | Different serology tests were used for participants                             |
| Unclear | No details were provided about which participants received which serology tests |

**Item 8: Was there appropriate statistical analysis?**

|     |                                                                                                                                                                                                                                                                                                                                                                                    |
|-----|------------------------------------------------------------------------------------------------------------------------------------------------------------------------------------------------------------------------------------------------------------------------------------------------------------------------------------------------------------------------------------|
| Yes | Does all of the following: corrects for population characteristics or the sample is somewhat representative of the population (probability sampling), corrects for test characteristics), and provides the information necessary to determine the numerator, denominator, prevalence estimate, and confidence interval.                                                            |
| No  | Does not correct for population characteristics and the sample is not likely representative of the population (non-probability sampling), does not correct for test or provide the information necessary to correct for test characteristics, or does not provide the information necessary to determine the numerator, denominator, prevalence estimate, and confidence interval. |

**Item 9: Was the response rate adequate, and if not, was the low response rate managed appropriately?**

|     |                                                                                                                              |
|-----|------------------------------------------------------------------------------------------------------------------------------|
| Yes | Response rate > 60% or the demographics of the sample were a reasonable match to those of the target population <sup>5</sup> |
|-----|------------------------------------------------------------------------------------------------------------------------------|

|         |                                                                                                                      |
|---------|----------------------------------------------------------------------------------------------------------------------|
| No      | Response rate < 60% and the demographics of the sample were not a reasonable match to those of the target population |
| Unclear | Response rate not provided and it was unclear if the demographics of the sample differed from the target population  |

| <b>Item 10: Overall risk of bias</b> |                                                                                                                                                                                                                                                                                                                                                                                                                                                                                                                                                                                                                                                                                                        |
|--------------------------------------|--------------------------------------------------------------------------------------------------------------------------------------------------------------------------------------------------------------------------------------------------------------------------------------------------------------------------------------------------------------------------------------------------------------------------------------------------------------------------------------------------------------------------------------------------------------------------------------------------------------------------------------------------------------------------------------------------------|
| Low                                  | The estimates are very likely correct for the target population. To obtain a low risk of bias classification, all criteria must be met or departures from the criteria must be minimal and unlikely to impact on the validity and reliability of the prevalence estimate. These include sample sizes that are just below the threshold when all other criteria are met, reporting only some of characteristics of the sample, test characteristics below the threshold but corrections for the test performance, and response rates that are just below the threshold in the context of probability based sampling of an appropriate sampling frame with population weighted seroprevalence estimates. |
| Moderate                             | The estimates are likely correct for the target population. To obtain a moderate risk of bias classification, most criteria must be met and departures from the criteria are likely to have only a small impact on the validity and reliability of the prevalence estimates.                                                                                                                                                                                                                                                                                                                                                                                                                           |
| High                                 | The estimates are not likely correct for the target population. To obtain a high risk of bias, many criteria must not be met or departures from criteria are likely to have a major impact on the validity and reliability of the prevalence estimates.                                                                                                                                                                                                                                                                                                                                                                                                                                                |
| Unclear                              | There was insufficient information to assess the risk of bias.                                                                                                                                                                                                                                                                                                                                                                                                                                                                                                                                                                                                                                         |

## References

1. Munn Z, Moola S, Lisy K, Riitano D, Tufanaru C. Methodological guidance for systematic reviews of observational epidemiological studies reporting prevalence and cumulative incidence data. *Int J Evid Based Healthc*. 2015 Sep;13(3):147–53.



- 1
  - 2
  - 3
  - 4
  - 5
  - 6
  - 7
  - 8
  - 9
  - 10
  - 11
  - 12
  - 13
  - 14
  - 15
  - 16
  - 17
  - 18
  - 19
  - 20
  - 21
  - 22
  - 23
  - 24
  - 25
  - 26
  - 27
  - 28
  - 29
  - 30
  - 31
  - 32
  - 33
  - 34
  - 35
  - 36
  - 37
  - 38
  - 39
  - 40
  - 41
  - 42
  - 43
  - 44
  - 45
  - 46
  - 47
  - 48
  - 49
  - 50
  - 51
  - 52
  - 53
  - 54
  - 55
  - 56
  - 57
  - 58
  - 59
  - 60
2. Boseley S. WHO warns that few have developed antibodies to Covid-19. The Guardian [Internet]. 2020 Apr 20; Available from: <https://www.theguardian.com/society/2020/apr/20/studies-suggest-very-few-have-had-covid-19-without-symptoms>
  3. Naing L, Winn T, Ruslil B. Practical issues in calculating the sample size for prevalence studies. Arch Orofac Sci. 2006;1:9–14.
  4. U.S. Food & Drug Administration. Emergency Use Authorization for SARS-CoV-2 Antibody Tests [Internet]. 2020 [cited 2020 May 5]. Available from: <https://www.fda.gov/media/137470/download>.
  5. Morton MBS, Bandara DK, Robinson EM, Carr PEA. In the 21<sup>st</sup> century, what is an acceptable response rate? Aust N Z J Public Health. 2012 April; 36 (2): 106-8.



# BMJ Open

## Occupation and SARS-CoV-2 seroprevalence studies: a systematic review

|                                 |                                                                                                                                                                                                                                                                                                                                                                                                                                                                                                                                                                                                                                                                                                                                                                                                                                                                                                                                                                                       |
|---------------------------------|---------------------------------------------------------------------------------------------------------------------------------------------------------------------------------------------------------------------------------------------------------------------------------------------------------------------------------------------------------------------------------------------------------------------------------------------------------------------------------------------------------------------------------------------------------------------------------------------------------------------------------------------------------------------------------------------------------------------------------------------------------------------------------------------------------------------------------------------------------------------------------------------------------------------------------------------------------------------------------------|
| Journal:                        | <i>BMJ Open</i>                                                                                                                                                                                                                                                                                                                                                                                                                                                                                                                                                                                                                                                                                                                                                                                                                                                                                                                                                                       |
| Manuscript ID                   | bmjopen-2022-063771.R1                                                                                                                                                                                                                                                                                                                                                                                                                                                                                                                                                                                                                                                                                                                                                                                                                                                                                                                                                                |
| Article Type:                   | Original research                                                                                                                                                                                                                                                                                                                                                                                                                                                                                                                                                                                                                                                                                                                                                                                                                                                                                                                                                                     |
| Date Submitted by the Author:   | 04-Nov-2022                                                                                                                                                                                                                                                                                                                                                                                                                                                                                                                                                                                                                                                                                                                                                                                                                                                                                                                                                                           |
| Complete List of Authors:       | Boucher, Emily; University of Calgary Cumming School of Medicine, Cao, Christian; University of Calgary, Cumming School of Medicine D'Mello, Sean; University of Waterloo<br>Duarte, Nathan; McGill University, Faculty of Engineering<br>Donnici, Claire; University of Calgary, Cumming School of Medicine<br>Duarte, Natalie; University of Toronto, Faculty of Arts and Science<br>Bennett, Graham; McGill University, Department of Economics Consortium, SeroTracker ; University of Calgary<br>Adishes, Anil; Unity Health Toronto, St. Michael's Hospital; University of Toronto, Division of Occupational Medicine<br>Arora, Rahul; Oxford University, Institute of Biomedical Engineering<br>Kodama, David; Unity Health Toronto, St. Michael's Hospital; University of Toronto Department of Medicine, Division of Emergency Medicine<br>Bobrovitz, Niklas; University of Toronto Temerty Faculty of Medicine; University of Calgary, Department of Critical Care Medicine |
| <b>Primary Subject Heading</b>: | Occupational and environmental medicine                                                                                                                                                                                                                                                                                                                                                                                                                                                                                                                                                                                                                                                                                                                                                                                                                                                                                                                                               |
| Secondary Subject Heading:      | Infectious diseases, Public health                                                                                                                                                                                                                                                                                                                                                                                                                                                                                                                                                                                                                                                                                                                                                                                                                                                                                                                                                    |
| Keywords:                       | COVID-19, Public health < INFECTIOUS DISEASES, OCCUPATIONAL & INDUSTRIAL MEDICINE                                                                                                                                                                                                                                                                                                                                                                                                                                                                                                                                                                                                                                                                                                                                                                                                                                                                                                     |
|                                 |                                                                                                                                                                                                                                                                                                                                                                                                                                                                                                                                                                                                                                                                                                                                                                                                                                                                                                                                                                                       |

SCHOLARONE™  
Manuscripts



I, the Submitting Author has the right to grant and does grant on behalf of all authors of the Work (as defined in the below author licence), an exclusive licence and/or a non-exclusive licence for contributions from authors who are: i) UK Crown employees; ii) where BMJ has agreed a CC-BY licence shall apply, and/or iii) in accordance with the terms applicable for US Federal Government officers or employees acting as part of their official duties; on a worldwide, perpetual, irrevocable, royalty-free basis to BMJ Publishing Group Ltd ("BMJ") its licensees and where the relevant Journal is co-owned by BMJ to the co-owners of the Journal, to publish the Work in this journal and any other BMJ products and to exploit all rights, as set out in our [licence](#).

The Submitting Author accepts and understands that any supply made under these terms is made by BMJ to the Submitting Author unless you are acting as an employee on behalf of your employer or a postgraduate student of an affiliated institution which is paying any applicable article publishing charge ("APC") for Open Access articles. Where the Submitting Author wishes to make the Work available on an Open Access basis (and intends to pay the relevant APC), the terms of reuse of such Open Access shall be governed by a Creative Commons licence – details of these licences and which [Creative Commons](#) licence will apply to this Work are set out in our licence referred to above.

Other than as permitted in any relevant BMJ Author's Self Archiving Policies, I confirm this Work has not been accepted for publication elsewhere, is not being considered for publication elsewhere and does not duplicate material already published. I confirm all authors consent to publication of this Work and authorise the granting of this licence.

## Occupation and SARS-CoV-2 seroprevalence studies: a systematic review

Emily Boucher,<sup>1</sup> Christian Cao<sup>1</sup>, Sean D’Mello,<sup>2</sup> Nathan Duarte,<sup>3</sup> Claire Donnici<sup>1</sup>, Natalie Duarte,<sup>4</sup> Graham Bennett,<sup>5</sup> SeroTracker Consortium, Anil Adisesh,<sup>6-8</sup> Rahul K. Arora,<sup>1,9</sup> David Kodama,<sup>6,10</sup> Niklas Bobrovitz<sup>11,12</sup>

1. Cumming School of Medicine, University of Calgary, Calgary, AB, Canada
2. Faculty of Engineering, University of Waterloo, Waterloo, ON, Canada
3. Faculty of Engineering, McGill University, Montreal, QC, Canada
4. Faculty of Arts and Science, University of Toronto, ON, Canada
5. Department of Economics, Faculty of Arts, McGill University, Montreal, QC, Canada
6. St. Michael’s Hospital, Unity Health Toronto, Toronto, ON, Canada
7. Division of Occupational Medicine, Department of Medicine, University of Toronto, Toronto, ON, Canada
8. Canadian Health Solutions, Saint John, NB, Canada
9. Institute of Biomedical Engineering, University of Oxford, Oxford, UK
10. Division of Emergency Medicine, Department of Medicine, University of Toronto, Toronto, ON, Canada
11. Temerty Faculty of Medicine, University of Toronto, Toronto, ON, Canada
12. Department of Critical Care Medicine, University of Calgary, Calgary, AB, Canada

\*Correspondence to Emily Boucher, Cumming School of Medicine, University of Calgary, Calgary, AB, Canada; [emily.boucher@ucalgry.ca](mailto:emily.boucher@ucalgry.ca)

1  
2  
3  
4  
5  
6  
7  
8  
9  
10  
11  
12  
13  
14  
15  
16  
17  
18  
19  
20  
21  
22  
23  
24  
25  
26  
27  
28  
29  
30  
31  
32  
33  
34  
35  
36  
37  
38  
39  
40  
41  
42  
43  
44  
45  
46  
47  
48  
49  
50  
51  
52  
53  
54  
55  
56  
57  
58  
59  
60

**Word Count** 1179

**Key Words** Covid-19, Infectious diseases, Occupational & industrial medicine

For peer review only

## ABSTRACT

**Objective.** To describe and synthesize studies of SARS-CoV-2 seroprevalence by occupation prior to the widespread vaccine rollout.

**Methods.** We identified studies of occupational seroprevalence from a living systematic review (PROSPERO CRD42020183634). Electronic databases, gray literature, and news media were searched for studies published January-December 2020. Seroprevalence estimates and a free text description of the occupation were extracted and classified according to the Standard Occupational Classification (SOC) 2010 system using a machine-learning algorithm. Due to heterogeneity, results were synthesized narratively.

**Results.** We identified 196 studies including 591,940 participants from 38 countries. Most studies (n=162; 83%) were conducted locally vs regionally or nationally. Sample sizes were generally small (median=220 participants per occupation) and 135 studies (69%) were at a high risk of bias. One or more estimates were available for 21/23 major SOC occupation groups, but over half of the estimates identified (n=359/600) were for healthcare-related occupations. 'Personal Care and Service Occupations' (median 22% [IQR 9-28%]; n=14) had the highest median seroprevalence.

**Conclusions.** Many seroprevalence studies covering a broad range of occupations were published in the first year of the pandemic. Results suggest considerable differences in seroprevalence between occupations, although few large, high-quality studies were done. Well-designed studies are required to improve our understanding of the occupational risk of SARS-CoV-2 and should be considered as an element of pandemic preparedness for future respiratory pathogens.

### 1 **Strengths and limitations**

- 2 • We conducted a comprehensive search of the COVID-19 seroprevalence literature, including
- 3 non-English articles, government reports, unpublished data.
- 4 • Occupations were classified using the Standard Occupational Classification (SOC) 2010
- 5 coding system to improve interpretability and facilitate comparison with other datasets.
- 6 • Seroprevalence may underestimate the true prevalence of infection because antibody titres
- 7 decline over time, but where possible we prioritized prevalence estimates for IgG antibodies,
- 8 which appear to be more robust than other immunoglobulin types.
- 9 • We did not adjust for differences in serologic test performance.

10  
11  
12  
13  
14  
15  
16  
17  
18  
19  
20  
21  
22  
23  
24  
25  
26  
27  
28  
29  
30  
31  
32  
33  
34  
35  
36  
37  
38  
39  
40  
41  
42  
43  
44  
45  
46  
47  
48  
49  
50  
51  
52  
53  
54  
55  
56  
57  
58  
59  
60

For peer review only

## INTRODUCTION

Occupation is a social determinant of health and an important risk factor for SARS-CoV-2 infection. Essential workers in health and social care occupations have an increased risk of COVID-19 compared to non-essential workers, but the risks for other occupations are not well defined.<sup>1-3</sup> Studies examining confirmed COVID-19 cases to examine occupational COVID-19 risk are affected by variable testing rates. For example, testing rates may be higher in workplaces offering testing or paid sick leave, and are impacted by geographic (e.g., urban versus rural) and socio-economic factors (e.g., deprivation), potentially biasing results.<sup>4-6</sup> Few high-quality, prospective studies using frequent, serial PCR or antigen testing covering a broad range of occupations having been conducted, in part due to the costs and administrative burden of such studies.<sup>7,8</sup>

Serologic testing for SARS-CoV-2 antibodies provides evidence of previous infection and/or vaccination depending on vaccination status and the specific antigens targeted and can be used to obtain more accurate estimates of the cumulative incidence of infection.<sup>9</sup> Accurate data on the occupational risks of COVID-19 and other respiratory infections are essential for informing the development of occupational safety guidelines and regulations, transmission control measures and resource allocation (testing, personal protective equipment (PPE), etc.). The objectives of this review were to describe and synthesize studies of SARS-CoV-2 seroprevalence across a broad range of occupations globally prior to the widespread rollout of vaccines.

## METHODS

We identified studies of occupational seroprevalence from a living systematic review (PROSPERO CRD42020183634) of >1000 seroprevalence studies.<sup>10-12</sup> In brief, electronic databases, grey literature, and news media were searched for cohort or cross-sectional studies reporting antibody testing for SARS-CoV-2. Records were screened independently, in duplicate. We restricted eligibility to studies in English, French or that were machine-translatable using Google Translate and published January-December 2020 before vaccines were rolled-out, because differential vaccination rates by occupation would obscure results. We extracted seroprevalence estimates with a free-text description for each occupation. If multiple estimates were reported, the most recent estimate using laboratory-based methods (e.g. ELISA), and anti-spike and/or IgG antibodies were prioritized, because non-IgG and anti-nucleocapsid antibodies may decline more rapidly.<sup>13</sup> Study-level risk of bias was assessed with a modified Joanna Briggs Institute Checklist for Prevalence Studies (**Supplementary File 1**).<sup>14</sup>

For each seroprevalence estimate, we identified the relevant Standard Occupational Classification (SOC) 2010 codes by applying the National Institute for Occupational Safety & Health (NIOSH) Industry and Occupation Computerized Coding System (NIOCCS) to occupation descriptions.<sup>15</sup> NIOCCS was chosen, because many studies were conducted in the USA. Coding was manually verified if there was insufficient information for NIOCCS classification, or if the probability of correct classification to the six-digit level was <0.8 based on our review of a subset of the NIOCCS coded data (**Supplementary File 1**). Anticipating substantial heterogeneity and an insufficient number of estimates relative to covariates for meta-regression, we planned to summarize data using the median/IQR.



60  
61 **Patient and Public Involvement:** It was not possible or appropriate to involve patients or the  
62 public in this study.

## 64 RESULTS

65  
66 We identified 196 studies of occupational seroprevalence conducted in 2020 during the first and  
67 second waves of the pandemic (**Figure 1**). There were 591,940 participants from 38 countries,  
68 including the USA (n=44 studies), UK (n=16) and Italy (n=15). Most studies (n=162; 83%) were  
69 conducted locally (e.g. city, county) as opposed to regionally (e.g. state; n=20; 10%) or  
70 nationally (n=14; 7%). Most were restricted to one occupational group (n=103), limiting direct  
71 comparisons (i.e. using the same reference group). Sample sizes were often small (median=220,  
72 IQR 64-568 participants). Overall, 135 studies (69%) were at a high risk of bias, 47 moderate  
73 (24%), 2 low (1%) and 12 unclear (6%). Common reasons for bias were inadequate statistical  
74 analysis (i.e. no adjustment for test or sample characteristics; 92%), non-probability sampling  
75 (74%), and small sample-size (46%).

76  
77 At least one estimate was available for all 23 major SOC occupation groups, except for 'Legal'  
78 and 'Military-Specific' occupations (**Figure 2**; all studies). Over half of the 600 estimates  
79 identified (n=359) were for healthcare-related occupations. For SOC groups with three or more  
80 estimates, the highest median seroprevalence was reported for 'Personal Care and Service  
81 Occupations' (median 22% [IQR 9-28%]; n=14, e.g. 'Personal Care Aids'). The next highest was  
82 reported for 'Building and Grounds Cleaning and Maintenance' occupations (11% [3-22%];  
83 n=17, e.g. 'Maids and Housekeeping Cleaners'), and 'Healthcare Support' (11% [2-20%]; n=39,  
84 e.g. 'Nursing Assistants') occupations. The lowest median seroprevalence was 1% (0-11%; n=6,

1  
2  
3 85 e.g. ‘Athletes’) for ‘Arts, Design, Entertainment, Sports, and Media Occupations.’ Individual  
4  
5 86 estimates are listed in **Supplementary File 2**.  
6  
7

## 8 87 9 88 10 89 **DISCUSSION** 11 90

12 91 This review is the first comprehensive synthesis of occupational COVID-19 seroprevalence  
13 92 studies world-wide. We identified 196 studies representing 21 out of 23 major SOC groups  
14 93 conducted during the first and second waves of the SARS-CoV-2 pandemic in 2020, prior to the  
15 94 widespread rollout of vaccines, and described occupational groups with high seroprevalence.  
16 95  
17 96 Seroprevalence studies may estimate the cumulative incidence of infection more accurately than  
18 97 diagnostic testing studies when access to testing and test performance are poor, and also can  
19 98 identify asymptomatic infections.<sup>6,8</sup> The data identified suggest considerable differences in  
20 99 seroprevalence by occupation, though we did not statistically test for differences due to  
21 100 considerable variation in geography, study dates and workplace determinants of infection (e.g.  
22 101 PPE, ventilation). ‘Caring and Personal Service’ occupations had the highest median  
23 102 seroprevalence (22%), which was four-times higher than the unemployed (5%) and median  
24 103 seroprevalence across all occupational groups (5%). The UK Office for National Statistics  
25 104 reported a slightly lower cumulative incidence for positive diagnostic or rapid tests for COVID-  
26 105 19 across 25 occupational groups of 4% (mean),<sup>4</sup> but the discrepancy between the true  
27 106 cumulative incidence and confirmed infections is likely greater in regions with less access to  
28 107 testing: national, population-based serosurveys have estimated there are 10-20 serologically  
29 108 identifiable cases per one confirmed case.<sup>12</sup>  
30  
31  
32  
33  
34  
35  
36  
37  
38  
39  
40  
41  
42  
43  
44  
45  
46  
47  
48  
49  
50  
51  
52  
53  
54  
55  
56  
57  
58  
59  
60

1  
2  
3 110 In future pandemics, large, well-reported, high-quality seroprevalence studies across a broad  
4  
5 111 range of occupations are needed at an early stage to inform appropriate workplace policy. It has  
6  
7  
8 112 been suggested that 20% of the US workforce was exposed to disease or infection at work at  
9  
10 113 least once a month prior to the pandemic.<sup>16</sup> Accurate data on the occupational risks of respiratory  
11  
12 114 infections, including SARS-CoV-2 are needed to inform understanding of transmission,  
13  
14 115 occupational health and safety agency guidelines and allocation of resources (e.g., personal  
15  
16 116 protective equipment and vaccines) during outbreaks and pandemics. For governments, there are  
17  
18  
19 117 also issues of occupational disease recognition and compensation to be considered.  
20  
21

22 118  
23  
24 119 As such, future population-based studies on respiratory infections should collect data on  
25  
26 120 occupation. In the case of epidemic infection, collaboration between academic centres with the  
27  
28 121 capacity to conduct large-scale studies and government agencies with expertise in disease  
29  
30 122 surveillance and access to workplace data (e.g., public health, occupational health and safety)  
31  
32 123 may be beneficial.<sup>12</sup> Other authors have suggested the utility of occupational surveillance  
33  
34 124 systems.<sup>17</sup> However, the routine completion of the occupation field in electronic health records  
35  
36 125 would also serve this purpose as well as informing patient reported outcome measures.  
37  
38  
39

40 126

## 41 42 127 **Strengths and Limitations**

43  
44 128 Despite the large number of studies of occupational seroprevalence conducted, many studies had  
45  
46 129 methodological limitations. Only two studies were at a low risk of bias and most occupational  
47  
48 130 subgroups had small sample sizes (median 220 participants). Many were limited to one major  
49  
50 131 SOC group (n=103 studies), which precluded comparisons. Detailed descriptions of occupations  
51  
52 132 were often lacking, potentially contributing to coding errors and misclassification, and workplace  
53  
54  
55 133 determinants of infection (e.g. use of PPE) were poorly reported.  
56  
57  
58  
59

1  
2  
3 134  
4  
5 135 In conclusion, our review shows that a large number of seroprevalence studies covering a broad  
6  
7 136 range of occupations were published in the first year of the pandemic. Results suggest  
8  
9 137 considerable differences in seroprevalence between occupations, although few large, well-  
10  
11 138 reported, high-quality studies were done. Carefully-designed, adequately powered  
12  
13 139 seroprevalence studies with coverage of a broad range of occupations could improve our  
14  
15 140 understanding of the occupational risk of SARS-CoV-2 and other respiratory infections and  
16  
17 141 should be considered an element of pandemic preparedness and response.  
18  
19  
20  
21  
22 142  
23 143  
24  
25  
26  
27  
28  
29  
30  
31  
32  
33  
34  
35  
36  
37  
38  
39  
40  
41  
42  
43  
44  
45  
46  
47  
48  
49  
50  
51  
52  
53  
54  
55  
56  
57  
58  
59  
60

## 144 **Funding Statement**

145 SeroTracker receives funding for SARS-CoV-2 seroprevalence study evidence synthesis from  
146 the Public Health Agency of Canada through Canada's COVID-19 Immunity Task Force (Grant  
147 Number 2021-HQ-000056), the World Health Organization Health Emergencies Programme, the  
148 Robert Koch Institute, and the Canadian Medical Association Joule Innovation Fund. No funding  
149 source had any role in the design of this study, its execution, analyses, interpretation of the data,  
150 or decision to submit results. This manuscript does not necessarily reflect the views of the World  
151 Health Organization or any other funder.

152

## 153 **Statement of author's contributions**

154 This secondary analysis of the SeroTracker database was conceived by NB, EB, DK and AA.  
155 Senior authors on this paper were NB, DK, RA and AA. The protocol was developed by EB, NB  
156 and DK. Data cleaning was performed by CC, CD, NaD, SD and EB and verification by EB, SD,  
157 ND and GB. Analysis was performed by EB and RA. The first draft of the manuscript was  
158 written by EB and revised by EB, RA, NB, ND, GB, SD, CC, AA, DK. The SeroTracker  
159 Consortium maintained the living systematic review database used in the study. All authors  
160 reviewed and agreed to the findings, and also provided critical revisions to the paper.

161

162

## 163 **Disclosure of potential and actual conflicts of interest**

164 RKA was previously a Technical Consultant for the Bill and Melinda Gates Foundation Strategic  
165 Investment Fund, is a minority shareholder of Alethea Medical, and was a former Senior Policy  
166 Advisor at Health Canada. Each of these relationships is unrelated to the present work.

167

1  
2  
3 168 JP reports grants to his institution from MedImmune, Sanofi Pasteur, Merck and AbbVie, and  
4  
5 169 personal fees for lectures from AbbVie and Astra-Zeneca, all outside of the submitted work.  
6  
7  
8 170  
9  
10 171 MPC reports grants from McGill Interdisciplinary Initiative in Infection and Immunity, grants  
11  
12 172 from Canadian Institutes of Health Research, during the conduct of the study; personal fees from  
13  
14 173 GEn1E Lifesciences, personal fees from nplex biosciences, personal fees from Kanvas  
15  
16 174 biosciences, personal fees from AstraZeneca, non-financial support from Cidara therapeutics,  
17  
18 175 non-financial support from Scynexis, Inc., non-financial support from Amplyx Pharmaceuticals,  
19  
20 176 outside the submitted work. In addition, MPC has a patent for methods detecting tissue damage,  
21  
22 177 graft versus host disease, and infections using cell-free DNA profiling pending, a patent for  
23  
24 178 methods assessing the severity and progression of SARS-CoV-2 infections using cell-free DNA  
25  
26 179 pending, a patent for rapid identification of antimicrobial resistance and other microbial  
27  
28 180 phenotypes using highly-multiplexed fluorescence in situ hybridization pending, and a patent  
29  
30 181 highly multiplexed detection of gene expression with hybridization chain reaction pending, all  
31  
32 182 outside the submitted work.  
33  
34  
35  
36  
37

38 183  
39 184 **Ethics approval:** Not applicable. This study did not involve human participants or animals.  
40  
41 185

42 186 **Dating sharing:** Seroprevalence data can be downloaded (or requested) from  
43 187 <https://serotracker.com>.  
44  
45 188  
46 189  
47 190  
48  
49  
50  
51  
52  
53  
54  
55  
56  
57  
58  
59  
60

## REFERENCES

1. Magnusson K, Nygard KM, Vold L, Telle KE. Occupational risk of COVID-19 in the 1st vs 2nd wave of infection. medRxiv. 2020 Jan 1.
2. Mutambudzi M, Niedwiedz C, Macdonald EB, Leyland A, Mair F, Anderson J, Celis-Morales C, Cleland J, Forbes J, Gill J, Hastie C. Occupation and risk of severe COVID-19: prospective cohort study of 120 075 UK Biobank participants. Occupational and Environmental Medicine. 2021 May 1;78(5):307-14.
3. Nguyen LH, Drew DA, Graham MS, Joshi AD, Guo CG, Ma W, Mehta RS, Warner ET, Sikavi DR, Lo CH, Kwon S. Risk of COVID-19 among front-line health-care workers and the general community: a prospective cohort study. The Lancet Public Health. 2020 Sep 1;5(9):e475-83.
4. Seo E, Mun E, Kim W, Lee C. Fighting the COVID-19 pandemic: onsite mass workplace testing for COVID-19 in the Republic of Korea. Annals of occupational and environmental medicine. 2020;32.
5. Tan TQ, Kullar R, Swartz TH, Mathew TA, Piggott DA, Berthaud V. Location matters: geographic disparities and impact of coronavirus disease 2019. The Journal of infectious diseases. 2020 Dec 15;222(12):1951-4.
6. Duarte N, D’Mello S, Duarte NA, Rocco S, Van Wyk J, Pillai AA, Liu M, Williamson T, Arora RK. Uptake of SARS-CoV-2 workplace testing programs, March 2020 to March 2021. medRxiv. 2021 Jan 1.
7. Office for National Statistics. Coronavirus (COVID-19) Infection Survey: characteristics of people testing positive for COVID-19 in England. 2021 Feb 22. Available from: <https://www.ons.gov.uk/peoplepopulationandcommunity/healthandsocialcare/conditionsanddiseases/articles/coronaviruscovid19infectionsinthecommunityinengland/characteristicsofpeopletestingpositiveforcovid19inengland22february2021>
8. Pearce N, Rhodes S, Stocking K, Pembrey L, van Veldhoven K, Brickley EB, Robertson S, Davoren D, Nafilyan V, Windsor-Shellard B, Fletcher T. Occupational differences in COVID-19 incidence, severity, and mortality in the United Kingdom: Available data and framework for analyses. Wellcome open research. 2021;6.
9. Duarte N, Yanes-Lane M, Arora RK, Bobrovitz N, Liu M, Bego MG, Yan T, Cao C, Gurry C, Hankins CA, Cheng MP. Adapting Serosurveys for the SARS-CoV-2 Vaccine Era. Open Forum Infect Dis. 2021 Dec 23;9(2):ofab632.

- 1  
2  
3 233  
4 234  
5 235  
6 236  
7  
8 237  
9 238  
10  
11 239  
12 240  
13 241  
14 242  
15 243  
16 244  
17  
18 245  
19  
20 246  
21 247  
22  
23 248  
24 249  
25 250  
26 251  
27  
28 252  
29 253  
30 254  
31 255  
32 256  
33 257  
34 258  
35 259  
36 260  
37 261  
38 262  
39 263  
40 264  
41 265  
42 266  
43 267  
44 268  
45 269  
46  
47  
48  
49  
50  
51  
52  
53  
54  
55  
56  
57  
58  
59  
60
10. Arora RK, Joseph A, Van Wyk J, Rocco S, Atmaja A, May E, et al.. SeroTracker: a global SARS-CoV-2 seroprevalence dashboard. *The Lancet Infectious Diseases*. *The Lancet Infectious Diseases*; 2021;21(4):e75–6.
  11. [dataset] SeroTracker Consortium. Data from: Our Data. November 7, 2021. <https://serotracker.com/data>
  12. Bobrovitz N, Arora RK, Cao C, Boucher E, Liu M, Donnici C, Yanes-Lane M, Whelan M, Perlman-Arrow S, Chen J, Rahim H. Global seroprevalence of SARS-CoV-2 antibodies: a systematic review and meta-analysis. *PloS one*. 2021 Jun 23;16(6):e0252617.
  13. Isho B, Abe KT, Zuo M, Jamal AJ, Rathod B, Wang JH, et al. Persistence of serum and saliva antibody responses to SARS-CoV-2 spike antigens in COVID-19 patients. *Sci Immunol*. 2020 Oct 8;5(52):eabe5511.
  14. Munn Z, Moola S, Lisy K, Riitano D, Tufanaru C. Methodological guidance for systematic reviews of observational epidemiological studies reporting prevalence and incidence data. *Int J Evid Based Healthc*. 2015;13(3):147–153.
  15. NIOSH (2021). NIOSH Industry and Occupation Computerized Coding System (NIOCCS). U.S. Department of Health and Human Services, Public Health Service, Centers for Disease Control and Prevention, National Institute for Occupational Safety and Health, Division of Field Studies & Engineering, Health Informatics Branch. <https://csams.cdc.gov/nioccs/About.aspx>. Date accessed Sept 1, 2021.
  16. Baker MG, Peckham TK, Seixas NS. Estimating the burden of United States workers exposed to infection or disease: a key factor in containing risk of COVID-19 infection. *PloS one*. 2020 Apr 28;15(4):e0232452.
  17. Marinaccio A, Boccuni F, Rondinone BM, Brusco A, D'Amario S, Iavicoli S. Occupational factors in the COVID-19 pandemic in Italy: compensation claims applications support establishing an occupational surveillance system. *Occupational and Environmental Medicine*. 2020 Dec 1;77(12):818-21.



1  
2  
3 **Figure Legends**  
4  
5  
6  
7

8 **Figure 1.** PRISMA flow diagram  
9

10  
11  
12 **Figure 2.** Seroprevalence by SOC 2010 major occupation group. \*Estimates are a mix of  
13  
14 ‘Healthcare Practitioners and Technical Occupations’ and ‘Healthcare Support Occupations’ (see  
15  
16 next page)  
17  
18  
19

20  
21 **Supplementary File 1.** Supplementary methods  
22

23  
24 **Supplementary File 2.** Summary of included studies and references  
25  
26  
27  
28  
29  
30  
31  
32  
33  
34  
35  
36  
37  
38  
39  
40  
41  
42  
43  
44  
45  
46  
47  
48  
49  
50  
51  
52  
53  
54  
55  
56  
57  
58  
59  
60

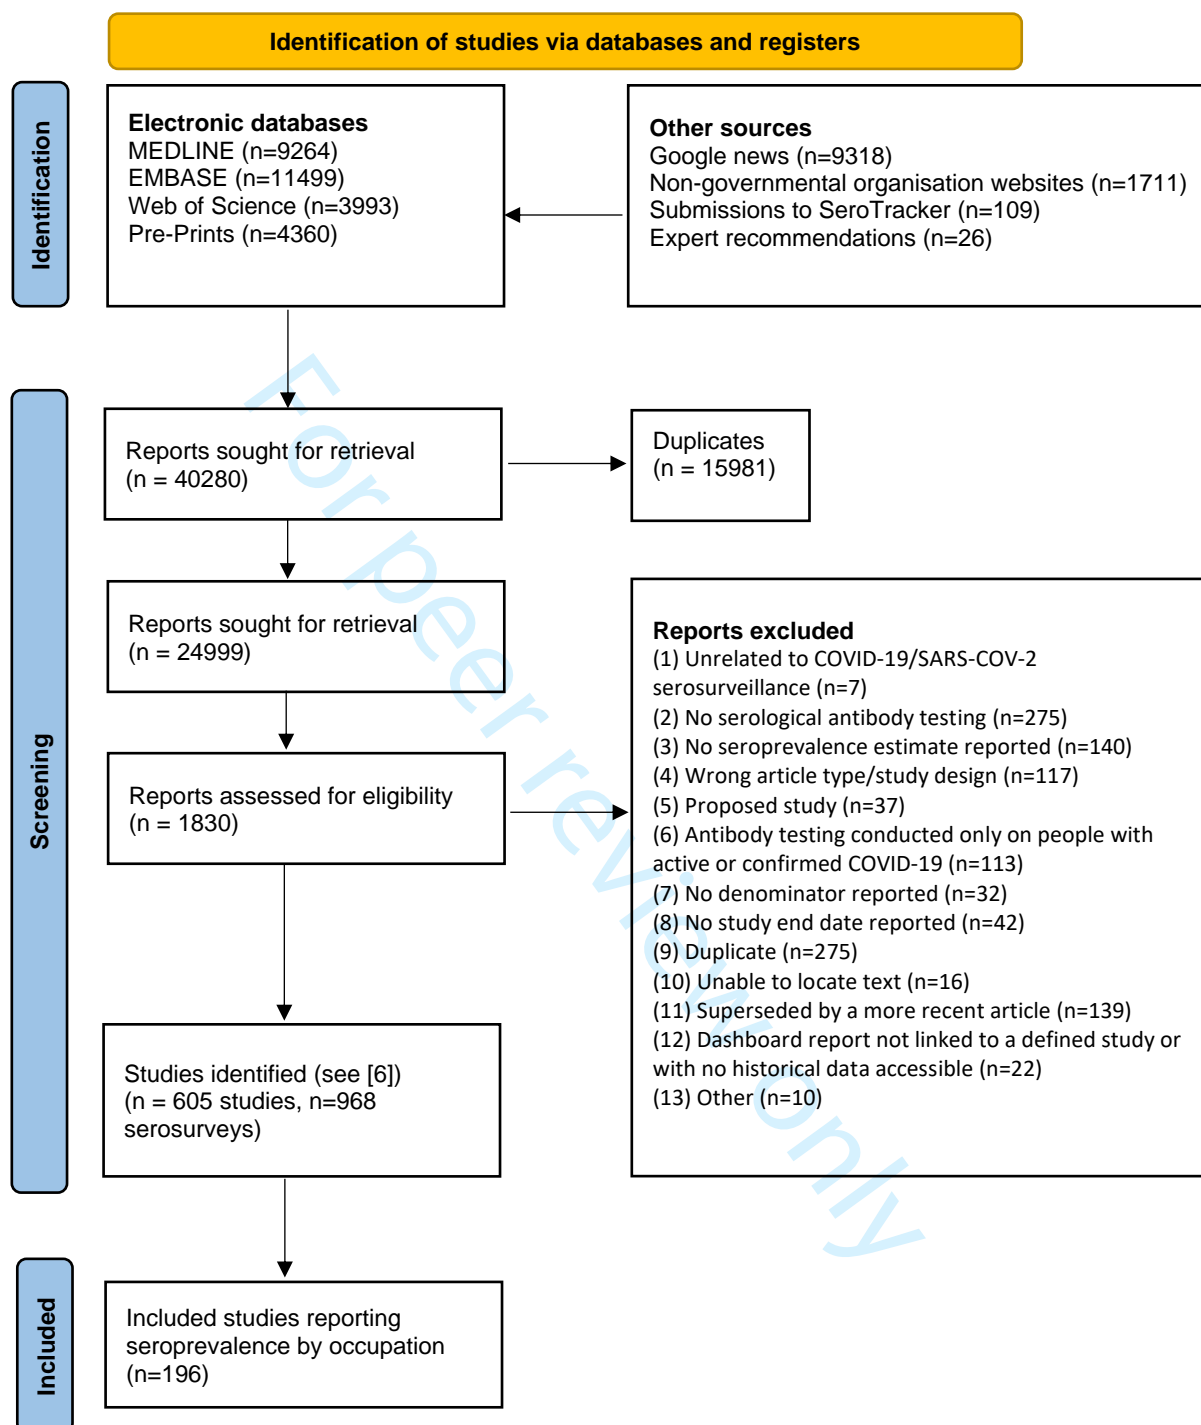

From: Page MJ, McKenzie JE, Bossuyt PM, Boutron I, Hoffmann TC, Mulrow CD, et al. The PRISMA 2020 statement: an updated guideline for reporting systematic reviews. *BMJ* 2021;372:n71. doi: 10.1136/bmj.n71

For more information, visit: <http://www.prisma-statement.org/>

| SOC 2010 Major Occupation Group                                         | Total     |           | BMJ Open              | Median, IQR    |                    | Seroprevalence % |                  | Page 18 of 119 |
|-------------------------------------------------------------------------|-----------|-----------|-----------------------|----------------|--------------------|------------------|------------------|----------------|
|                                                                         | Estimates | Countries | Study dates, midpoint | Sample size    | (Median, IQR)      | (Scale 0-75%)    | Low-Moderate RoB |                |
| 1 Architecture and Engineering Occupations (17-0000)                    | 1         | 1         | 15/08 (15/08-15/08)   | 21 (21-21)     | 42.9 (42.9-42.9)   |                  | 0 (0%)           |                |
| 2 Personal Care and Service Occupations (39-0000)                       | 14        | 7         | 03/05 (02/04-02/06)   | 127 (54-302)   | 21.5 (9.32-27.76)  |                  | 3 (21%)          |                |
| 3 Installation, Maintenance, and Repair Occupations (49-0000)           | 1         | 1         | 19/06 (19/06-19/06)   | 134 (134-134)  | 16.4 (16.4-16.4)   |                  | 0 (0%)           |                |
| 4 Building and Grounds Cleaning and Maintenance Occupations (37-0000)   | 17        | 8         | 13/07 (09/06-16/08)   | 102 (42-226)   | 10.8 (3.3-21.7)    |                  | 6 (35%)          |                |
| 5 Healthcare Support Occupations (31-0000)                              | 39        | 12        | 05/06 (19/05-21/06)   | 263 (122-562)  | 10.7 (2-20.05)     |                  | 12 (31%)         |                |
| 6 Business and Financial Operations Occupations (13-0000)               | 2         | 2         | 05/07 (18/06-22/07)   | 462 (252-671)  | 8.27 (5.3-11.23)   |                  | 2 (100%)         |                |
| 8 Management Occupations (11-0000)                                      | 10        | 6         | 17/06 (01/05-02/08)   | 44 (23-145)    | 8.17 (6.7-19.93)   |                  | 3 (30%)          |                |
| 9 Food Preparation and Serving Related Occupations (35-0000)            | 6         | 4         | 17/06 (11/05-23/07)   | 58 (12-108)    | 6.35 (2.37-24.03)  |                  | 2 (33%)          |                |
| 10 Healthcare Practitioners and Technical Occupations (29-0000)         | 222       | 23        | 13/06 (13/05-13/07)   | 215 (64-482)   | 5.91 (1.83-11.71)  |                  | 84 (38%)         |                |
| 11 Healthcare Practitioners and Technical Occupations, 5-digit codes**  |           |           |                       |                |                    |                  |                  |                |
| 12 Miscellaneous Health Technologists and Technicians                   | 4         | 3         | 26/08 (09/08-12/09)   | 60 (20-121)    | 12.96 (9.09-27.54) |                  | 1 (25%)          |                |
| 13 Registered Nurses                                                    | 78        | 18        | 05/06 (05/05-05/07)   | 329 (71-1000)  | 8.44 (3.68-15.5)   |                  | 22 (28%)         |                |
| 14 Clinical Laboratory Technologists and Technicians                    | 18        | 12        | 15/06 (19/05-11/07)   | 204 (86-284)   | 6.22 (2.07-11.94)  |                  | 12 (67%)         |                |
| 16 Physicians and Surgeons                                              | 65        | 21        | 09/06 (10/05-09/07)   | 214 (59-564)   | 5.88 (1.85-11.8)   |                  | 23 (35%)         |                |
| 17 Emergency Medical Technicians and Paramedics                         | 9         | 6         | 13/06 (27/05-30/06)   | 157 (56-243)   | 5.41 (5.2-11)      |                  | 4 (44%)          |                |
| 18 Therapists                                                           | 15        | 4         | 08/06 (19/05-28/06)   | 121 (61-235)   | 3.75 (0-9.45)      |                  | 7 (47%)          |                |
| 19 Physician Assistants                                                 | 9         | 2         | 27/06 (26/05-28/07)   | 230 (156-320)  | 3.48 (0.64-9.43)   |                  | 3 (33%)          |                |
| 21 Pharmacists                                                          | 9         | 7         | 29/06 (14/06-14/07)   | 113 (29-213)   | 0.5 (0-3.45)       |                  | 4 (44%)          |                |
| 22 Healthcare Occupations (mixed)*                                      | 94        | 25        | 05/06 (29/04-12/07)   | 375 (110-1012) | 5.66 (2.35-11.6)   |                  | 23 (24%)         |                |
| 23 Sales and Related Occupations (41-0000)                              | 23        | 8         | 21/08 (22/06-19/10)   | 643 (236-1184) | 5.3 (1.2-8.8)      |                  | 6 (26%)          |                |
| 24 Education, Training, and Library Occupations (25-0000)               | 6         | 5         | 05/07 (12/06-27/07)   | 238 (73-1305)  | 5.07 (2.71-17.22)  |                  | 3 (50%)          |                |
| 25 Farming, Fishing, and Forestry Occupations (45-0000)                 | 3         | 3         | 13/07 (25/06-30/07)   | 80 (66-100)    | 5 (2.5-5)          |                  | 1 (33%)          |                |
| 26 Not employed (mixed)*                                                | 37        | 14        | 23/06 (12/05-04/08)   | 382 (116-905)  | 4.9 (2.7-14.97)    |                  | 28 (76%)         |                |
| 28 Office and Administrative Support Occupations (43-0000)              | 39        | 18        | 14/06 (18/05-11/07)   | 120 (32-522)   | 4.88 (1.36-13.36)  |                  | 20 (51%)         |                |
| 29 First responders (mixed)*                                            | 6         | 1         | 18/05 (13/05-22/05)   | 219 (72-599)   | 4.67 (1.6-7.34)    |                  | 1 (17%)          |                |
| 30 Community and Social Service Occupations (21-0000)                   | 6         | 2         | 30/05 (18/05-11/06)   | 104 (49-188)   | 4.45 (2.13-6.1)    |                  | 1 (17%)          |                |
| 32 Protective Service Occupations (33-0000)                             | 28        | 9         | 04/07 (21/05-16/08)   | 190 (46-555)   | 4.29 (2.17-7.47)   |                  | 6 (21%)          |                |
| 33 Transportation and Material Moving Occupations (53-0000)             | 23        | 7         | 08/08 (08/06-08/10)   | 230 (80-364)   | 3.5 (1.8-11.8)     |                  | 8 (35%)          |                |
| 34 Life, Physical, and Social Science Occupations (19-0000)             | 11        | 7         | 06/07 (11/06-30/07)   | 343 (174-570)  | 2.6 (1.66-6.46)    |                  | 4 (36%)          |                |
| 35 Production Occupations (51-0000)                                     | 4         | 3         | 23/05 (26/04-19/06)   | 764 (342-1132) | 1.52 (1.45-4.93)   |                  | 2 (50%)          |                |
| 36 Arts, Design, Entertainment, Sports, and Media Occupations (27-0000) | 6         | 5         | 07/07 (04/06-09/08)   | 164 (47-823)   | 1.39 (0.18-11.02)  |                  | 3 (50%)          |                |
| 38 Computer and Mathematical Occupations (15-0000)                      | 1         | 1         | 03/05 (03/05-03/05)   | 47 (47-47)     | 0 (0-0)            |                  | 1 (100%)         |                |
| 39 Construction and Extraction Occupations (47-0000)                    | 1         | 1         | 03/05 (03/05-03/05)   | 42 (42-42)     | 0 (0-0)            |                  | 1 (100%)         |                |

**S1 Materials**

**Table of Contents**

**Supplementary files..... 2**

S1 File. PRISMA checklist.....2

S2 File. Search strategy .....4

S3 File. Tool for assessing study risk of bias.....8

S4 File. Details of occupational coding ..... 11

**References for supplementary files ..... 13**

For peer review only

12 **Supplementary files**  
13 **S1 File. PRISMA checklist**

| Section/topic                      | #  | Checklist item                                                                                                                                                                                                                                                                                              | Reported on page #                                |
|------------------------------------|----|-------------------------------------------------------------------------------------------------------------------------------------------------------------------------------------------------------------------------------------------------------------------------------------------------------------|---------------------------------------------------|
| <b>TITLE</b>                       |    |                                                                                                                                                                                                                                                                                                             |                                                   |
| Title                              | 1  | Identify the report as a systematic review, meta-analysis, or both.                                                                                                                                                                                                                                         | 0                                                 |
| <b>ABSTRACT</b>                    |    |                                                                                                                                                                                                                                                                                                             |                                                   |
| Structured summary                 | 2  | Provide a structured summary including, as applicable: background; objectives; data sources; study eligibility criteria, participants, and interventions; study appraisal and synthesis methods; results; limitations; conclusions and implications of key findings; systematic review registration number. | 1                                                 |
| <b>INTRODUCTION</b>                |    |                                                                                                                                                                                                                                                                                                             |                                                   |
| Rationale                          | 3  | Describe the rationale for the review in the context of what is already known.                                                                                                                                                                                                                              | 3, lines 14-30                                    |
| Objectives                         | 4  | Provide an explicit statement of questions being addressed with reference to participants, interventions, comparisons, outcomes, and study design (PICOS).                                                                                                                                                  | 3, line 30-32                                     |
| <b>METHODS</b>                     |    |                                                                                                                                                                                                                                                                                                             |                                                   |
| Protocol and registration          | 5  | Indicate if a review protocol exists, if and where it can be accessed (e.g., Web address), and, if available, provide registration information including registration number.                                                                                                                               | 3, line 39                                        |
| Eligibility criteria               | 6  | Specify study characteristics (e.g., PICOS, length of follow-up) and report characteristics (e.g., years considered, language, publication status) used as criteria for eligibility, giving rationale.                                                                                                      | 4, lines 39-45                                    |
| Information sources                | 7  | Describe all information sources (e.g., databases with dates of coverage, contact with study authors to identify additional studies) in the search and date last searched.                                                                                                                                  | 4, lines 39-40                                    |
| Search                             | 8  | Present full electronic search strategy for at least one database, including any limits used, such that it could be repeated.                                                                                                                                                                               | Suppl. File 2                                     |
| Study selection                    | 9  | State the process for selecting studies (i.e., screening, eligibility, included in systematic review, and, if applicable, included in the meta-analysis).                                                                                                                                                   | 4, lines 41-43                                    |
| Data collection process            | 10 | Describe method of data extraction from reports (e.g., piloted forms, independently, in duplicate) and any processes for obtaining and confirming data from investigators.                                                                                                                                  | 4, lines 41-49, 57-58                             |
| Data items                         | 11 | List and define all variables for which data were sought (e.g., PICOS, funding sources) and any assumptions and simplifications made.                                                                                                                                                                       | 4, lines 44-45 (see reference to previous study)  |
| Risk of bias in individual studies | 12 | Describe methods used for assessing risk of bias of individual studies (including specification of whether this was done at the study or outcome level), and how this information is to be used in any data synthesis.                                                                                      | 4, see reference and Suppl. File 1                |
| Summary measures                   | 13 | State the principal summary measures (e.g., risk ratio, difference in means).                                                                                                                                                                                                                               | 4, lines 57-78                                    |
| Synthesis of results               | 14 | Describe the methods of handling data and combining results of studies, if done, including measures of consistency (e.g., $I^2$ ) for each meta-analysis.                                                                                                                                                   | 4, lines 57-58                                    |
| Risk of bias across studies        | 15 | Specify any assessment of risk of bias that may affect the cumulative evidence (e.g., publication bias, selective reporting within studies).                                                                                                                                                                | 4, lines 47-48                                    |
| Additional analyses                | 16 | Describe methods of additional analyses (e.g., sensitivity or subgroup analyses, meta-regression), if done, indicating which were pre-specified.                                                                                                                                                            | NA                                                |
| <b>RESULTS</b>                     |    |                                                                                                                                                                                                                                                                                                             |                                                   |
| Study selection                    | 17 | Give numbers of studies screened, assessed for eligibility, and included in the review, with reasons for exclusions at each stage, ideally with a flow diagram.                                                                                                                                             | Suppl File 1                                      |
| Study characteristics              | 18 | For each study, present characteristics for which data were extracted (e.g., study size, PICOS, follow-up period) and provide the citations.                                                                                                                                                                | Suppl. File 2                                     |
| Risk of bias within studies        | 19 | Present data on risk of bias of each study and, if available, any outcome level assessment (see item 12).                                                                                                                                                                                                   | Suppl. File 2                                     |
| Results of individual studies      | 20 | For all outcomes considered (benefits or harms), present, for each study: (a) simple summary data for each intervention group (b) effect estimates and confidence intervals, ideally with a forest plot.                                                                                                    | Suppl. File 2                                     |
| Synthesis of results               | 21 | Present results of each meta-analysis done, including confidence intervals and measures of consistency.                                                                                                                                                                                                     | NA – see narrative synthesis on page 5 & Figure 1 |
| Risk of bias across studies        | 22 | Present results of any assessment of risk of bias across studies (see Item 15).                                                                                                                                                                                                                             | 5, lines 72-75<br>Figure 1                        |
| Additional analysis                | 23 | Give results of additional analyses, if done (e.g., sensitivity or subgroup analyses, meta-regression [see Item 16]).                                                                                                                                                                                       | NA                                                |
| <b>DISCUSSION</b>                  |    |                                                                                                                                                                                                                                                                                                             |                                                   |
| Summary of evidence                | 24 | Summarize the main findings including the strength of evidence for each main outcome; consider their relevance to key groups (e.g., healthcare providers, users, and policy makers).                                                                                                                        | 6, lines 110-118                                  |

|                |    |                                                                                                                                                               |                  |
|----------------|----|---------------------------------------------------------------------------------------------------------------------------------------------------------------|------------------|
| Limitations    | 25 | Discuss limitations at study and outcome level (e.g., risk of bias), and at review-level (e.g., incomplete retrieval of identified research, reporting bias). | 6, lines 131-136 |
| Conclusions    | 26 | Provide a general interpretation of the results in the context of other evidence, and implications for future research.                                       | 6, lines 119-120 |
| <b>FUNDING</b> |    |                                                                                                                                                               |                  |
| Funding        | 27 | Describe sources of funding for the systematic review and other support (e.g., supply of data); role of funders for the systematic review.                    | 9                |

14

For peer review only

## S2 File. Search strategy

Database: Ovid MEDLINE(R) and Epub Ahead of Print, In-Process & Other Non-Indexed Citations and Daily

Dates: January 1, 2020 to December 31, 2020

Notes: Covid-19 search terms were adapted from Ovid Expert Searches

| #  | Search terms                                                                                                                                                                                                                                                                                                                                                                                                                                                                                        |
|----|-----------------------------------------------------------------------------------------------------------------------------------------------------------------------------------------------------------------------------------------------------------------------------------------------------------------------------------------------------------------------------------------------------------------------------------------------------------------------------------------------------|
| 1  | exp Coronavirus/                                                                                                                                                                                                                                                                                                                                                                                                                                                                                    |
| 2  | exp Coronavirus Infections/                                                                                                                                                                                                                                                                                                                                                                                                                                                                         |
| 3  | (coronavirus* or corona virus* or OC43 or NL63 or 229E or HKU1 or HCoV* or ncov* or covid* or sars-cov* or sarscov* or Sars-coronavirus* or Severe Acute Respiratory Syndrome Coronavirus*).tw,kf.[EB2]                                                                                                                                                                                                                                                                                             |
| 4  | or/1-3                                                                                                                                                                                                                                                                                                                                                                                                                                                                                              |
| 5  | 4 not ((MERS or MERS-CoV or Middle East respiratory syndrome or camel* or dromedar* or equine or coronary or coronal or covidence* or covidien or influenza virus or HIV or bovine or calves or TGEV or feline or porcine or BCoV or PED or PEDV or PDCoV or FIPV or FCoV or SADS-CoV or canine or CCov or zoonotic or avian influenza or H1N1 or H5N1 or H5N6 or IBV).mp. or (animals/ not humans/))                                                                                               |
| 6  | ((pneumonia or covid* or coronavirus* or corona virus* or ncov* or 2019-ncov or sars* or virus).tw,kf. or exp pneumonia/) and Wuhan.tw,kf.                                                                                                                                                                                                                                                                                                                                                          |
| 7  | (2019-ncov* or 2019nCov* or ncov19 or ncov-19 or 2019-novel CoV or sars-cov2* or sars-cov-2* or sarscov2* or sarscov-2* or Sars-coronavirus2 or Sars-coronavirus-2 or SARS-like coronavirus* or coronavirus 2 or coronavirus2* or corona or coronavirus-19 or covid19 or covid-19 or covid 2019 or ((novel or new or nouveau) adj2 (CoV or nCoV or covid or coronavirus* or corona virus or Pandemi*2)) or ((covid or covid19* or covid-19) and pandemic*2) or (coronavirus* and pneumonia)).tw,kf. |
| 8  | COVID-19.rx,px,ox. or severe acute respiratory syndrome coronavirus 2.os.                                                                                                                                                                                                                                                                                                                                                                                                                           |
| 9  | or/6-8                                                                                                                                                                                                                                                                                                                                                                                                                                                                                              |
| 10 | 5 or 9                                                                                                                                                                                                                                                                                                                                                                                                                                                                                              |
| 11 | immunoglobulins/ or antibodies/ or antibodies, blocking/ or exp antibodies, neutralizing/ or antibodies, viral/ or antigen-antibody complex/ or immune sera/ or exp immunoglobulin isotypes/ or immunoglobulin a/ or immunoglobulin d/ or immunoglobulin e/ or immunoglobulin g/ or immunoglobulin m/                                                                                                                                                                                               |
| 12 | serologic tests/ or complement fixation tests/ or hemagglutination inhibition tests/ or neutralization tests/                                                                                                                                                                                                                                                                                                                                                                                       |
| 13 | immunoassay/ or fluoroimmunoassay/ or exp immunoblotting/ or immunoenzyme techniques/ or exp enzyme-linked immunosorbent assay/ or exp enzyme-linked immunosorbent assay/ or immunosorbent techniques/ or serologic tests/ or complement fixation tests/ or hemagglutination inhibition tests/ or neutralization tests/ or Serology/di                                                                                                                                                              |
| 14 | (enzyme linked immunosorbent or enzyme-linked immunosorbent or ELISA or immunofluorescence or complement fixation or hemagglutination inhibition or immunoblot or western blot or neutrali*).tw,kf.                                                                                                                                                                                                                                                                                                 |
| 15 | (antibod* or immunoglobulin* or immune globulin* or titer* or isotype* or IgG or IgM or IgA or neutrali* or sera or serum or serolog* or saliva).tw,kf.                                                                                                                                                                                                                                                                                                                                             |
| 16 | or/11-14                                                                                                                                                                                                                                                                                                                                                                                                                                                                                            |
| 17 | seroepidemiologic studies/                                                                                                                                                                                                                                                                                                                                                                                                                                                                          |
| 18 | incidence/ or prevalence/                                                                                                                                                                                                                                                                                                                                                                                                                                                                           |
| 19 | (seroconver* or seroprevalence or sero-prevalence or seroincidence or sero-incidence or seroepidemiolog* or sero-epidemiolog*).mp.                                                                                                                                                                                                                                                                                                                                                                  |
| 20 | (inciden* or prevalen* or count* or rate*).mp.                                                                                                                                                                                                                                                                                                                                                                                                                                                      |
| 21 | (serosurvey or sero-survey or screen* or diagnostic).mp.                                                                                                                                                                                                                                                                                                                                                                                                                                            |
| 22 | (seroconver* or seroprevalence or sero-prevalence or seroincidence or sero-incidence or seroepidemiolog* or sero-epidemiolog* or inciden* or prevalen* or silent or asymptomatic or serosurvey or sero-survey).tw,kf.                                                                                                                                                                                                                                                                               |
| 23 | or/17-21                                                                                                                                                                                                                                                                                                                                                                                                                                                                                            |
| 24 | 10 and (16 and 23)                                                                                                                                                                                                                                                                                                                                                                                                                                                                                  |
| 25 | 10 and 15                                                                                                                                                                                                                                                                                                                                                                                                                                                                                           |
| 26 | 10 and 22                                                                                                                                                                                                                                                                                                                                                                                                                                                                                           |
| 27 | or/24-26                                                                                                                                                                                                                                                                                                                                                                                                                                                                                            |
| 28 | limit 27 to yr="2020-Current"                                                                                                                                                                                                                                                                                                                                                                                                                                                                       |
| 29 | remove duplicates from 28                                                                                                                                                                                                                                                                                                                                                                                                                                                                           |



**Database: Embase****Dates:** January 1, 2020 to December 31, 2020**Notes:** Covid-19 search terms were adapted from Ovid Expert Searches

| #  | Searches                                                                                                                                                                                                                                                                                                                                                                                                                             |
|----|--------------------------------------------------------------------------------------------------------------------------------------------------------------------------------------------------------------------------------------------------------------------------------------------------------------------------------------------------------------------------------------------------------------------------------------|
| 1  | exp Coronavirus/                                                                                                                                                                                                                                                                                                                                                                                                                     |
| 2  | exp Coronavirus Infections/                                                                                                                                                                                                                                                                                                                                                                                                          |
| 3  | (coronavirus* or corona virus* or OC43 or NL63 or 229E or HKU1 or HCoV* or nCoV* or covid* or sars-cov* or sarscov* or Sars-coronavirus* or Severe Acute Respiratory Syndrome Coronavirus*).tw,kw.                                                                                                                                                                                                                                   |
| 4  | or/1-3                                                                                                                                                                                                                                                                                                                                                                                                                               |
| 5  | 4 not ((MERS or MERS-CoV or Middle East respiratory syndrome or camel* or dromedar* or equine or coronary or coronal or coidence* or covidien or influenza virus or HIV or bovine or calves or TGEV or feline or porcine or BCoV or PED or PEDV or PDCoV or FIPV or FCoV or SADS-CoV or canine or CCov or zoonotic or avian influenza or H1N1 or H5N1 or H5N6 or IBV).mp. or (animals/ not humans/))                                 |
| 6  | ((pneumonia or covid* or coronavirus* or corona virus* or nCoV* or 2019-nCoV or sars*).tw,kw. or exp pneumonia/) and Wuhan.tw,kw.                                                                                                                                                                                                                                                                                                    |
| 7  | (2019-nCoV or nCoV19 or nCoV-19 or 2019-novel CoV or sars-cov2 or sars-cov-2 or sarscov2 or sarscov-2 or Sars-coronavirus2 or Sars-coronavirus-2 or SARS-like coronavirus* or coronavirus-19 or covid19 or covid-19 or covid 2019 or ((novel or new or nouveau) adj2 (CoV or nCoV or covid or coronavirus* or corona virus or Pandemi*2)) or ((covid or covid19 or covid-19) and pandemic*2) or (coronavirus* and pneumonia)).tw,kw. |
| 8  | (coronavirus disease 2019 or severe acute respiratory syndrome coronavirus 2).sh,dj.                                                                                                                                                                                                                                                                                                                                                 |
| 9  | 6 or 7 or 8                                                                                                                                                                                                                                                                                                                                                                                                                          |
| 10 | 5 or 9                                                                                                                                                                                                                                                                                                                                                                                                                               |
| 11 | virus antibody/ec [Endogenous Compound]                                                                                                                                                                                                                                                                                                                                                                                              |
| 12 | neutralizing antibody/ec [Endogenous Compound]                                                                                                                                                                                                                                                                                                                                                                                       |
| 13 | exp immunoglobulin/ or exp immunoglobulin A antibody/ or exp immunoglobulin class/ or exp immunoglobulin M antibody/ or exp immunoglobulin G antibody/ or exp immunoglobulin antibody/                                                                                                                                                                                                                                               |
| 14 | 11 or 12 or 13                                                                                                                                                                                                                                                                                                                                                                                                                       |
| 15 | serology/                                                                                                                                                                                                                                                                                                                                                                                                                            |
| 16 | serodiagnosis/ or complement fixation test/ or hemagglutination inhibition test/ or hemolytic plaque assay/                                                                                                                                                                                                                                                                                                                          |
| 17 | fluorescent antibody technique/                                                                                                                                                                                                                                                                                                                                                                                                      |
| 18 | immunofluorescence test/ or viral disease immunofluorescence assay/                                                                                                                                                                                                                                                                                                                                                                  |
| 19 | enzyme linked immunosorbent assay/                                                                                                                                                                                                                                                                                                                                                                                                   |
| 20 | western blotting/                                                                                                                                                                                                                                                                                                                                                                                                                    |
| 21 | (enzyme linked immunosorbent or enzyme-linked immunosorbent or ELISA or immunoassay or immunofluorescence or fluorescent antibody or complement fixation or hemagglutination inhibition or hemolytic plaque assay or immunoblot or western blot or neutrali*).tw,kw.                                                                                                                                                                 |
| 22 | (antibod* or immunoglobulin* or immune globulin* or titer* or isotype* or IgG or IgM or IgA or neutrali* or sera or serolog* or serum or saliva).tw,kw.                                                                                                                                                                                                                                                                              |
| 23 | 15 or 16 or 17 or 18 or 19 or 20 or 21                                                                                                                                                                                                                                                                                                                                                                                               |
| 24 | 14 or 23                                                                                                                                                                                                                                                                                                                                                                                                                             |
| 25 | exp seroepidemiology/                                                                                                                                                                                                                                                                                                                                                                                                                |
| 26 | *prevalence/                                                                                                                                                                                                                                                                                                                                                                                                                         |
| 27 | *incidence/                                                                                                                                                                                                                                                                                                                                                                                                                          |
| 28 | (seroconver* or seroprevalence or sero-prevalence or seroincidence or sero-incidence or seroepidemiolog* or sero-epidemiolog* or inciden* or prevalen* or count* or rate* or serosurvey or sero-survey or screen* or diagnostic).mp.                                                                                                                                                                                                 |
| 29 | (seroconver* or seroprevalence or sero-prevalence or seroincidence or sero-incidence or seroepidemiolog* or sero-epidemiolog* or inciden* or prevalen* or silent or asymptomatic or serosurvey or sero-survey).tw,kw.                                                                                                                                                                                                                |
| 30 | 25 or 26 or 27 or 28                                                                                                                                                                                                                                                                                                                                                                                                                 |
| 31 | 10 and (24 and 30)                                                                                                                                                                                                                                                                                                                                                                                                                   |
| 32 | 10 and 22                                                                                                                                                                                                                                                                                                                                                                                                                            |
| 33 | 10 and 29                                                                                                                                                                                                                                                                                                                                                                                                                            |
| 34 | 31 or 32 or 33                                                                                                                                                                                                                                                                                                                                                                                                                       |
| 35 | limit 34 to yr="2020-Current"                                                                                                                                                                                                                                                                                                                                                                                                        |
| 36 | remove duplicates from 35                                                                                                                                                                                                                                                                                                                                                                                                            |



Database: Web of Science Core Collection

Date: January 1, 2020 to December 31, 2020

| #  | Searches                                                                                                                                                                                                                                                                                                                                                                       |
|----|--------------------------------------------------------------------------------------------------------------------------------------------------------------------------------------------------------------------------------------------------------------------------------------------------------------------------------------------------------------------------------|
| 1  | TS=(coronavirus* or corona virus* or OC43 or NL63 or 229E or HKU1 or HCoV* or ncov* or covid* or sars-cov* or sarscov* or Sars-coronavirus* or Severe Acute Respiratory Syndrome Coronavirus*)                                                                                                                                                                                 |
| 2  | TS=(MERS or MERS-CoV or Middle East respiratory syndrome or camel* or dromedar* or equine or coronary or coronal or coidence* or covidien or influenza virus or HIV or bovine or calves or TGEV or feline or porcine or BCoV or PED or PEDV or PDCoV or FIPV or FCoV or SADS-CoV or canine or CCov or zoonotic or avian influenza or H1N1 or H5N1 or H5N6 or IBV)              |
| 3  | #1 NOT #2                                                                                                                                                                                                                                                                                                                                                                      |
| 4  | TS=((pneumonia or covid* or coronavirus* or corona virus* or ncov* or 2019-ncov or sars* or virus) AND Wuhan)                                                                                                                                                                                                                                                                  |
| 5  | TS=(2019-ncov* or 2019nCov* or ncov19 or ncov-19 or 2019-novel CoV or sars-cov2* or sars-cov-2* or sarscov2* or sarscov-2* or Sars-coronavirus2 or Sars-coronavirus-2 or SARS-like coronavirus* or corona or coronavirus-19 or covid19 or covid-19 or covid 2019 or ((novel or new or nouveau) adj2 (CoV or nCoV or covid or coronavirus*)) or (coronavirus* and pneumonia) ). |
| 6  | TS=(COVID-19 or "severe acute respiratory syndrome coronavirus")                                                                                                                                                                                                                                                                                                               |
| 7  | #6 OR #5 OR #4 OR #3                                                                                                                                                                                                                                                                                                                                                           |
| 8  | TS=(antibod* or immunoglobulin* or immune globulin* or titer* or isotype* or IgG or IgM or IgA or neutralization or sera or serolog* or saliva or serum).                                                                                                                                                                                                                      |
| 9  | TS=("enzyme linked immunosorbent assay" or "enzyme-linked immunosorbent assay" or "immunoenzyme" or ELISA or "lateral flow immunoassay" or LFIA or "immunofluorescence assay" or immunochromatography or "complement fixation test" or "hemagglutination inhibition" or immunoblot or "western blot" or "neutralization assay")                                                |
| 10 | #9 OR #8                                                                                                                                                                                                                                                                                                                                                                       |
| 11 | TI=(seroconversion or seroprevalence or seroincidence or seroepidemiolog* or incidence or prevalence or asymptomatic or sero-survey*) or AK=(seroconversion or seroprevalence or seroincidence or seroepidemiolog* or incidence or prevalence or asymptomatic or sero-survey*)                                                                                                 |
| 12 | ALL=(prevalence or incidence or seroconversion or seroconvert or seroprevalence or seroincidence or seroepidemiolog* or serosurvey or sero-survey or survey or screen* or diagnostic test)                                                                                                                                                                                     |
| 13 | #12 AND #10 AND #7                                                                                                                                                                                                                                                                                                                                                             |
| 14 | #11 AND #7                                                                                                                                                                                                                                                                                                                                                                     |
| 15 | TI=(antibod* or immunoglobulin* or immune globulin* or titer* or isotype* or IgG or IgM or IgA or neutralization or sera or serolog* or saliva or serum).                                                                                                                                                                                                                      |
| 16 | #15 AND #7                                                                                                                                                                                                                                                                                                                                                                     |
| 17 | #16 OR #14 OR #13                                                                                                                                                                                                                                                                                                                                                              |

Database: Europe PMC [Secondary search for pre-prints]

Dates: January 1, 2020 to December 31, 2020

| # | Searches                                                                                                                                                                                                                                                                                                                                                                                                                                                                              |
|---|---------------------------------------------------------------------------------------------------------------------------------------------------------------------------------------------------------------------------------------------------------------------------------------------------------------------------------------------------------------------------------------------------------------------------------------------------------------------------------------|
|   | ("2019-nCoV" OR "2019nCoV" OR "COVID-19" OR "SARS-CoV-2" OR "COVID19" OR "COVID" OR "SARS-nCoV" OR ("wuhan" AND "coronavirus") OR "Coronavirus" OR "Corona virus" OR "corona-virus" OR "corona viruses" OR "coronaviruses" OR "SARS-CoV" OR "Severe Acute Respiratory Syndrome Coronavirus" OR ("SARS" AND "coronavirus")) AND ABSTRACT:(sera* OR sero* OR immun* OR Ig* OR "enzyme-linked immunosorbent assay" OR ELISA OR "neutralization assay" OR seroprevalence) AND (SRC:"PPR") |

**Sources: Health organizations**

Dates: January 1, 2020 to December 31, 2020

| Source                                                   | Search strategy |                                                                   |
|----------------------------------------------------------|-----------------|-------------------------------------------------------------------|
| WHO Situation Reports                                    | 1               | "antibod", "sero", "immun", "ELISA"                               |
| National Institutes of Health                            | 1               | ("COVID" OR "SARS-CoV-2")                                         |
|                                                          | 2               | ("sero*" OR "antibod*" OR "immun*" OR "RDT" OR "ELISA" OR "LFIA") |
|                                                          | 3               | allintext:(1 AND 2) site:nih.gov -site:ncbi.nlm.nih.gov           |
|                                                          | 3               | 2 AND 3                                                           |
| United States Centres for Disease Control and Prevention | 1               | ("COVID" OR "SARS-CoV-2")                                         |
|                                                          | 2               | ("sero*" OR "antibod*" OR "immun*" OR "RDT" OR "ELISA" OR "LFIA") |
|                                                          | 3               | allintext:(1 AND 2) site:cdc.gov                                  |
|                                                          | 5               | 2 AND 3                                                           |
| European Centres for Disease Control and Prevention      | 1               | ("COVID" OR "SARS-CoV-2")                                         |
|                                                          | 2               | ("sero*" OR "antibod*" OR "immun*" OR "RDT" OR "ELISA" OR "LFIA") |
|                                                          | 3               | allintext:(1 AND 2) site:ecdc.europa.eu                           |
|                                                          | 5               | 2 AND 3                                                           |

**Sources: Google News**

Dates: January 1, 2020 to December 31, 2020

| Source      | Search strategy |                                                                                                                                                                                               |
|-------------|-----------------|-----------------------------------------------------------------------------------------------------------------------------------------------------------------------------------------------|
| Google news | 1               | (antibody OR antibodies OR surveillance OR screen OR serology OR serological OR serosurvey OR ELISA OR LFIA OR assay OR blood OR serum OR immune OR immunity OR herd immunity OR random test) |

### S3 File. Tool for assessing study risk of bias

| Item 1: Was the sample frame appropriate to address the target population? |                                                                                                                                                                                                                                                                                                                                                                                                                                                                                                                                                                                                                                                                                                                                                                                         |
|----------------------------------------------------------------------------|-----------------------------------------------------------------------------------------------------------------------------------------------------------------------------------------------------------------------------------------------------------------------------------------------------------------------------------------------------------------------------------------------------------------------------------------------------------------------------------------------------------------------------------------------------------------------------------------------------------------------------------------------------------------------------------------------------------------------------------------------------------------------------------------|
| Yes                                                                        | Sample frame described and it approximated the target population                                                                                                                                                                                                                                                                                                                                                                                                                                                                                                                                                                                                                                                                                                                        |
| No                                                                         | Sample frame did not approximate the target population (e.g., blood donors do not represent general population, doctors do not represent all health care providers)                                                                                                                                                                                                                                                                                                                                                                                                                                                                                                                                                                                                                     |
| Exclude                                                                    | Sample frame not described                                                                                                                                                                                                                                                                                                                                                                                                                                                                                                                                                                                                                                                                                                                                                              |
| *Notes                                                                     | The term “target population” should not be taken to infer every individual from everywhere or with similar disease or exposure characteristics. Instead, give consideration to specific population characteristics in the study, including age range, gender, morbidities, medications, and other potentially influential factors. For example, a sample frame may not be appropriate to address the target population if a certain group has been used (such as those working for one organisation, or one profession) and the results then inferred to the target population (i.e. working adults). A sample frame may be appropriate when it includes almost all the members of the target population (i.e. a census, or a complete list of participants or complete registry data). |

| Item 2: Were study participants recruited in an appropriate way? |                                                                                                            |
|------------------------------------------------------------------|------------------------------------------------------------------------------------------------------------|
| Yes                                                              | Probability sampling method (simple or stratified random) or entire sample (e.g., an entire town) was used |
| No                                                               | Non-probability sampling                                                                                   |
| Exclude                                                          | Sampling method not reported                                                                               |

| Item 3: Was the sample size adequate? |                                                                                                                                                                                                                                                                                                                                                                                                                                                                                                                                                                                                                                                                                                                                                                                                                                           |
|---------------------------------------|-------------------------------------------------------------------------------------------------------------------------------------------------------------------------------------------------------------------------------------------------------------------------------------------------------------------------------------------------------------------------------------------------------------------------------------------------------------------------------------------------------------------------------------------------------------------------------------------------------------------------------------------------------------------------------------------------------------------------------------------------------------------------------------------------------------------------------------------|
| Yes                                   | ≥599                                                                                                                                                                                                                                                                                                                                                                                                                                                                                                                                                                                                                                                                                                                                                                                                                                      |
| No                                    | <599                                                                                                                                                                                                                                                                                                                                                                                                                                                                                                                                                                                                                                                                                                                                                                                                                                      |
| Exclude                               | Sample size not reported                                                                                                                                                                                                                                                                                                                                                                                                                                                                                                                                                                                                                                                                                                                                                                                                                  |
| *Notes                                | <p>To calculate the required sample size we used an assumed prevalence of 2.5%, which was the global average estimated by the WHO in April, 2020.<sup>1</sup> Based on guidance by the Joanna Briggs Institute and published medical statistical recommendations we selected a precision value that was half the assumed prevalence (1.25%) [2,3]. We calculated a minimum sample size of 599 using these inputs:</p> <p>Sample size calculation: <math>n = \frac{Z^2 P(1-P)}{d^2}</math></p> <p>Where n = sample size;<br/> Z = Z statistic for level of confidence (95%);<br/> P = expected prevalence (2.5% WHO global estimate);<br/> d = precision (1.25%)</p> <p>In cases where the sample size calculation was provided and the required sample for 80% power was below our threshold (n&lt;599), this item was marked as yes.</p> |

| Item 4: Were the study subjects and setting described in detail? |                                                                                      |
|------------------------------------------------------------------|--------------------------------------------------------------------------------------|
| Yes                                                              | Average age and distribution of gender/sex provided                                  |
| No                                                               | Neither age or gender/sex is provided, or only one of age and gender/sex is provided |

1  
2  
3  
4  
5  
6  
7  
8  
9  
10  
11  
12  
13  
14  
15  
16  
17  
18  
19  
20  
21  
22  
23  
24  
25  
26  
27  
28  
29  
30  
31  
32  
33  
34  
35  
36  
37  
38  
39  
40  
41  
42  
43  
44  
45  
46  
47  
48  
49  
50  
51  
52  
53  
54  
55  
56  
57  
58  
59  
60

| <b>Item 5: Was data analysis conducted with sufficient coverage of the identified sample?</b> |                                                                                                                                      |
|-----------------------------------------------------------------------------------------------|--------------------------------------------------------------------------------------------------------------------------------------|
| Yes                                                                                           | The demographic characteristics (gender/sex, age, and ethnicity) of the sample is at least somewhat representative of the population |
| No                                                                                            | The demographic characteristics (gender/sex, age, and ethnicity) of the sample is not representative of the population               |
| Unclear                                                                                       | Information is not provided about demographic characteristics of the sample (gender/sex, age, and ethnicity)                         |

| <b>Item 6: Were valid methods used for the identification of the condition?</b> |                                                                                                                                                                                      |
|---------------------------------------------------------------------------------|--------------------------------------------------------------------------------------------------------------------------------------------------------------------------------------|
| Yes                                                                             | The test used met the FDA standards for Emergency Use Authorizations for COVID-19 serological tests: sensitivity minimum 90%, specificity minimum 95%, as reported in the study [4]. |
| No                                                                              | The test used did not meet the FDA standards for Emergency Use Authorizations for COVID-19 serological tests: sensitivity minimum 90%, specificity minimum 95%.                      |
| Exclude                                                                         | Test sensitivity and specificity not reported                                                                                                                                        |

| <b>Item 7: Was the condition measured in a standard, reliable way for all participants?</b> |                                                                                 |
|---------------------------------------------------------------------------------------------|---------------------------------------------------------------------------------|
| Yes                                                                                         | The same serology test was used for all participants                            |
| No                                                                                          | Different serology tests were used for participants                             |
| Unclear                                                                                     | No details were provided about which participants received which serology tests |

| <b>Item 8: Was there appropriate statistical analysis?</b> |                                                                                                                                                                                                                                                                                                                                                                                    |
|------------------------------------------------------------|------------------------------------------------------------------------------------------------------------------------------------------------------------------------------------------------------------------------------------------------------------------------------------------------------------------------------------------------------------------------------------|
| Yes                                                        | Does all of the following: corrects for population characteristics or the sample is somewhat representative of the population (probability sampling), corrects for test characteristics), and provides the information necessary to determine the numerator, denominator, prevalence estimate, and confidence interval.                                                            |
| No                                                         | Does not correct for population characteristics and the sample is not likely representative of the population (non-probability sampling), does not correct for test or provide the information necessary to correct for test characteristics, or does not provide the information necessary to determine the numerator, denominator, prevalence estimate, and confidence interval. |

| <b>Item 9: Was the response rate adequate, and if not, was the low response rate managed appropriately?</b> |                                                                                                                      |
|-------------------------------------------------------------------------------------------------------------|----------------------------------------------------------------------------------------------------------------------|
| Yes                                                                                                         | Response rate > 60% or the demographics of the sample were a reasonable match to those of the target population [5]  |
| No                                                                                                          | Response rate < 60% and the demographics of the sample were not a reasonable match to those of the target population |
| Unclear                                                                                                     | Response rate not provided and it was unclear if the demographics of the sample differed from the target population  |

| <b>Item 10: Overall risk of bias</b> |                                                                                                                                                                                                                                                                                                                                                                         |
|--------------------------------------|-------------------------------------------------------------------------------------------------------------------------------------------------------------------------------------------------------------------------------------------------------------------------------------------------------------------------------------------------------------------------|
| Low                                  | The estimates are very likely correct for the target population. To obtain a low risk of bias classification, all criteria must be met or departures from the criteria must be minimal and unlikely to impact on the validity and reliability of the prevalence estimate. These include sample sizes that are just below the threshold when all other criteria are met, |

|          |                                                                                                                                                                                                                                                                                                                                |
|----------|--------------------------------------------------------------------------------------------------------------------------------------------------------------------------------------------------------------------------------------------------------------------------------------------------------------------------------|
|          | reporting only some of characteristics of the sample, test characteristics below the threshold but corrections for the test performance, and response rates that are just below the threshold in the context of probability based sampling of an appropriate sampling frame with population weighted seroprevalence estimates. |
| Moderate | The estimates are likely correct for the target population. To obtain a moderate risk of bias classification, most criteria must be met and departures from the criteria are likely to have only a small impact on the validity and reliability of the prevalence estimates.                                                   |
| High     | The estimates are not likely correct for the target population. To obtain a high risk of bias, many criteria must not be met or departures from criteria are likely to have a major impact on the validity and reliability of the prevalence estimates.                                                                        |
| Unclear  | There was insufficient information to assess the risk of bias.                                                                                                                                                                                                                                                                 |

For peer review only

1  
2 **S5 File. Details of occupational coding**  
3

4 3 For each seroprevalence estimate, we identified the relevant Standard Occupational Classification  
5 4 (SOC) 2010 codes. This was done by applying the National Institute for Occupational Safety & Health  
6 5 (NIOSH) Industry and Occupation Computerized Coding System (NIOCCS) to text occupation  
7 6 descriptions extracted by members of the research team. There is no standard cut-off for manually  
8 7 verifying results from the National Institute for Occupational Safety & Health (NIOSH) Industry and  
9 8 Occupation Computerized Coding System (NIOCCS). However, NIOCCS reports the probability of  
10 9 correct classification to the six-digit level. After manually verifying a subset of records from the first  
11 10 round of classification, we decided to manual perform a second round of classification for any  
12 11 observations for which the probability of correct classification was  $<0.8$ . This cut-off was chosen based  
13 12 on the observation that that most codes with a probability of correct classification to of  $\geq 0.8$  to the  
14 13 six-digit level were correctly coded at the two- and three-digit level, which we used in our main  
15 14 analyses and are more likely to be coded correctly than the more granular, 6-digit codes and  
16 15 consideration of the number of records that could feasibly be verified manually  
17  
18  
19  
20  
21  
22  
23  
24  
25  
26  
27  
28  
29  
30  
31  
32  
33  
34  
35  
36  
37  
38  
39  
40  
41  
42  
43  
44  
45  
46  
47  
48  
49  
50  
51  
52  
53  
54  
55  
56  
57  
58  
59  
60

1  
2  
3  
4 16 **References for supplementary files**

- 5 17  
6 18 1. Boseley S. WHO warns that few have developed antibodies to Covid-19. The Guardian [Internet]. 2020 Apr 20;  
7 19 Available from: [https://www.theguardian.com/society/2020/apr/20/studies-suggest-very-few-have-had-covid-19-](https://www.theguardian.com/society/2020/apr/20/studies-suggest-very-few-have-had-covid-19-without-symptoms)  
8 20 without-symptoms  
9 21 2. Munn Z, Moola S, Lisy K, Riitano D, Tufanaru C. Methodological guidance for systematic reviews of observational  
10 22 epidemiological studies reporting prevalence and cumulative incidence data. *Int J Evid Based Healthc*. 2015  
11 23 Sep;13(3):147–53.  
12 24 3. Naing L, Winn T, Ruslil B. Practical issues in calculating the sample size for prevalence studies. *Arch Orofac Sci*.  
13 25 2006;1:9–14.  
14 26 4. U.S. Food & Drug Administration. Emergency Use Authorization for SARS-CoV-2 Antibody Tests [Internet]. 2020  
15 27 [cited 2020 May 5]. Available from: <https://www.fda.gov/media/137470/download>.  
16 28 5. Morton MBS, Bandara DK, Robinson EM, Carr PEA. In the 21<sup>st</sup> century, what is an acceptable response rate?  
17 29 *Aust N Z J Public Health*. 2012 April; 36 (2): 106-8.  
18 30 6. Bobrovitz N, Arora RK, Cao C, Boucher E, Liu M, Donnici C, Yanes-Lane M, Whelan M, Perlman-Arrow S, Chen J,  
19 31 Rahim H. Global seroprevalence of SARS-CoV-2 antibodies: A systematic review and meta-analysis. *PloS one*. 2021  
20 32 Jun 23;16(6):e0252617.

1  
2 33  
3  
4  
5  
6  
7  
8  
9  
10  
11  
12  
13  
14  
15  
16  
17  
18  
19  
20  
21  
22  
23  
24  
25  
26  
27  
28  
29  
30  
31  
32  
33  
34  
35  
36  
37  
38  
39  
40  
41  
42  
43  
44  
45  
46  
47  
48  
49  
50  
51  
52  
53  
54  
55  
56  
57  
58  
59  
60

For peer review only



**Supplementary File I.** List of all estimates, included studies and references

| SOC 2010 Major Group  | Study                              | N      | SOC 2010 Occupation Title | Study Type                                                                        | Study Dates   | Country                  | Serum positive prevalence (95% CIs) | Overall Risk of Bias (JBI) |
|-----------------------|------------------------------------|--------|---------------------------|-----------------------------------------------------------------------------------|---------------|--------------------------|-------------------------------------|----------------------------|
| Not employed (mixed)* | Merkely et al., 2020 <sup>1</sup>  | n=209  | Homemaker (Unpaid)        | Cross-sectional survey                                                            | 05/01 - 05/16 | Hungary                  | 0.73% (0-1.74%)                     | Moderate                   |
| Not employed (mixed)* | Siddiqui et al., 2020 <sup>2</sup> | n=37   | Homemaker (Unpaid)        | Prospective cohort                                                                | 04/15 - 08/15 | India                    | 18.9%                               | High                       |
| Not employed (mixed)* | Biggs et al., 2020 <sup>3</sup>    | n=157  | Retired (Unpaid)          | Cross-sectional survey                                                            | 04/28 - 05/03 | United States of America | 1.91%                               | Moderate                   |
| Not employed (mixed)* | Carrat et al., 2020 <sup>4</sup>   | n=5381 | Retired (Unpaid)          | Prospective cohort                                                                | 05/04 - 06/23 | France                   | 4.3% (3.5-5%)                       | Moderate                   |
| Not employed (mixed)* | Merkely et al., 2020 <sup>1</sup>  | n=2767 | Retired (Unpaid)          | Cross-sectional survey                                                            | 05/01 - 05/16 | Hungary                  | 1.09% (0.66-1.52%)                  | Moderate                   |
| Not employed (mixed)* | Richard et al., 2020 <sup>5</sup>  | n=1635 | Retired (Unpaid)          | Cross-sectional survey                                                            | 04/06 - 06/30 | Switzerland              | 4.3%                                | Low                        |
| Not employed (mixed)* | Siddiqui et al., 2020 <sup>2</sup> | n=10   | Retired (Unpaid)          | Prospective cohort                                                                | 04/15 - 08/15 | India                    | 20%                                 | High                       |
| Not employed (mixed)* | Alemu et al., 2020 <sup>6</sup>    | n=32   | Student (Unpaid)          | Cross-sectional survey                                                            | 04/23 - 04/28 | Ethiopia                 | 15.6%                               | Moderate                   |
| Not employed (mixed)* | Biggs et al., 2020 <sup>3</sup>    | n=16   | Student (Unpaid)          | Cross-sectional survey                                                            | 04/28 - 05/03 | United States of America | 12.5%                               | Moderate                   |
| Not employed (mixed)* | Brehm et al., 2020 <sup>7</sup>    | n=73   | Student (Unpaid)          | Cross sectional study with prospective cohort follow up of a subset of the sample | 03/20 - 07/17 | Germany                  | 2.7%                                | Moderate                   |
| Not employed (mixed)* | Carrat et al., 2020 <sup>4</sup>   | n=81   | Student (Unpaid)          | Prospective cohort                                                                | 05/04 - 06/23 | France                   | 7.2% (0.1-12.6%)                    | Moderate                   |

|                                  |                                        |        |                                                    |                        |               |                            |                    |          |
|----------------------------------|----------------------------------------|--------|----------------------------------------------------|------------------------|---------------|----------------------------|--------------------|----------|
| Not employed (mixed)*            | Iversen et al., 2020 <sup>8</sup>      | n=688  | Student (Unpaid)                                   | Cross-sectional survey | 04/15 - 04/22 | Denmark                    | 14.97%             | Low      |
| Not employed (mixed)*            | Lumley et al., 2020 <sup>9</sup>       | n=620  | Student (Unpaid)                                   | Prospective cohort     | 04/23 - 11/30 | The United Kingdom         | 6.77%              | Moderate |
| Not employed (mixed)*            | Merkely et al., 2020 <sup>1</sup>      | n=774  | Student (Unpaid)                                   | Cross-sectional survey | 05/01 - 05/16 | Hungary                    | 0.69% (0-1.49%)    | Moderate |
| Not employed (mixed)*            | Richard et al., 2020 <sup>5</sup>      | n=666  | Student (Unpaid)                                   | Cross-sectional survey | 04/06 - 06/30 | Switzerland                | 10.5%              | Low      |
| Not employed (mixed)*            | Shakiba et al., 2020 <sup>10</sup>     | n=114  | Student (Unpaid)                                   | Cross-sectional survey | 04/11 - 04/19 | Iran (Islamic Republic of) | 17.5% (11.3-23.7%) | Moderate |
| Not employed (mixed)*            | Siddiqui et al., 2020 <sup>2</sup>     | n=14   | Student (Unpaid)                                   | Prospective cohort     | 04/15 - 08/15 | India                      | 21.4%              | High     |
| Not employed (mixed)*            | Tilley et al., 2020 <sup>11</sup>      | n=790  | Student (Unpaid)                                   | Cross-sectional survey | 04/29 - 05/08 | United States of America   | 4% (3-5.1%)        | Moderate |
| Not employed (mixed)*            | Tsitsilonis et al., 2020 <sup>12</sup> | n=1395 | Student (Unpaid)                                   | Cross-sectional survey | 06/15 - 07/15 | Greece                     | 0.42% (0.03-1.5%)  | Moderate |
| Not employed (mixed)*            | Arnaldo et al., 2020 <sup>13</sup>     | n=513  | Military, Rank Not Specified                       | Cross-sectional survey | 07/06 - 07/13 | Mozambique                 | 3.7%               | High     |
| Not employed (mixed)*            | Arnaldo et al., 2020 <sup>14</sup>     | n=116  | Military, Rank Not Specified                       | Cross-sectional survey | 11/02 - 11/12 | Mozambique                 | 1.7%               | High     |
| Not employed (mixed)*            | Mabunda et al., 2020 <sup>15</sup>     | n=324  | Military, Rank Not Specified                       | Cross-sectional survey | 09/21 - 10/02 | Mozambique                 | 2.8%               | High     |
| Not employed (mixed)*            | Mahomed et al., 2020 <sup>16</sup>     | n=116  | Military, Rank Not Specified                       | Cross-sectional survey | 11/26 - 12/03 | Mozambique                 | 18.1%              | High     |
| Not employed (mixed)*            | Payne et al., 2020 <sup>17</sup>       | n=382  | Military, Rank Not Specified                       | Cross-sectional survey | 04/20 - 04/24 | United States of America   | 59.7%              | High     |
| Not employed (mixed)*            | World et al., 2020 <sup>18</sup>       | n=6900 | Military, Rank Not Specified                       | Cross-sectional survey | 08/15 - 10/15 | Republic of Korea          | 0.36%              | Unclear  |
| Management Occupations (11-0000) | Shakiba et al., 2020 <sup>10</sup>     | n=16   | Farmers, Ranchers, and Other Agricultural Managers | Cross-sectional survey | 04/11 - 04/19 | Iran (Islamic Republic of) | 19.7% (9.1-31%)    | Moderate |
| Management Occupations (11-      | Favara et al., 2020 <sup>19</sup>      | n=43   | Medical and Health Services Managers               | Cross-sectional survey | 07/13 - 07/13 | The United Kingdom         | 9.3%               | High     |

|                                                         |                                     |        |                                      |                                                                                   |               |                            |                    |          |
|---------------------------------------------------------|-------------------------------------|--------|--------------------------------------|-----------------------------------------------------------------------------------|---------------|----------------------------|--------------------|----------|
| 0000)                                                   |                                     |        |                                      |                                                                                   |               |                            |                    |          |
| Management Occupations (11-0000)                        | Galan et al., 2020 <sup>20</sup>    | n=170  | Medical and Health Services Managers | Cross-sectional survey                                                            | 04/14 - 04/27 | Spain                      | 27.6%              | High     |
| Management Occupations (11-0000)                        | Hunter et al., 2020 <sup>21</sup>   | n=44   | Medical and Health Services Managers | Cross-sectional survey                                                            | 04/29 - 05/08 | United States of America   | 4.55%              | High     |
| Management Occupations (11-0000)                        | Leidner et al., 2020 <sup>22</sup>  | n=257  | Medical and Health Services Managers | Cross sectional study with prospective cohort follow up of a subset of the sample | 04/08 - 05/22 | United States of America   | 3.11%              | High     |
| Management Occupations (11-0000)                        | Martin et al., 2020 <sup>23</sup>   | n=2078 | Medical and Health Services Managers | Cross-sectional survey                                                            | 05/29 - 07/13 | The United Kingdom         | 6.79%              | Moderate |
| Management Occupations (11-0000)                        | Siddiqui et al., 2020 <sup>2</sup>  | n=15   | Medical and Health Services Managers | Prospective cohort                                                                | 04/15 - 08/15 | India                      | 20%                | High     |
| Management Occupations (11-0000)                        | Baracco et al., 2020 <sup>24</sup>  | n=45   | Managers, All Other                  | Cross-sectional survey                                                            | 04/23 - 05/05 | Italy                      | 6.67%              | High     |
| Management Occupations (11-0000)                        | Goenka et al., 2020 <sup>25</sup>   | n=71   | Managers, All Other                  | Cross-sectional survey                                                            | 07/12 - 08/23 | India                      | 7.04%              | Moderate |
| Management Occupations (11-0000)                        | Goenka et al., 2020 <sup>26</sup>   | n=13   | Managers, All Other                  | Cross-sectional survey                                                            | 08/01 - 08/31 | India                      | 38.46%             | High     |
| Business and Financial Operations Occupations (13-0000) | Satpati et al., 2020 <sup>27</sup>  | n=43   | Management Analysts                  | Cross-sectional survey                                                            | 07/26 - 08/08 | India                      | 2.33%              | Moderate |
| Business and Financial                                  | Poustchi et al., 2020 <sup>28</sup> | n=880  | Financial Specialists                | Cross-sectional survey                                                            | 04/17 - 06/02 | Iran (Islamic Republic of) | 14.2% (12.1-16.5%) | Moderate |

|                                                          |                                    |        |                                            |                                                                                   |               |                          |       |          |
|----------------------------------------------------------|------------------------------------|--------|--------------------------------------------|-----------------------------------------------------------------------------------|---------------|--------------------------|-------|----------|
| Operations Occupations (13-0000)                         |                                    |        |                                            |                                                                                   |               |                          |       |          |
| Computer and Mathematical Occupations (15-0000)          | Biggs et al., 2020 <sup>3</sup>    | n=47   | Computer User Support Specialists          | Cross-sectional survey                                                            | 04/28 - 05/03 | United States of America | 0%    | Moderate |
| Architecture and Engineering Occupations (17-0000)       | Siddiqui et al., 2020 <sup>2</sup> | n=21   | Engineers                                  | Prospective cohort                                                                | 04/15 - 08/15 | India                    | 42.9% | High     |
| Life, Physical, and Social Science Occupations (19-0000) | Jones et al., 2020 <sup>29</sup>   | n=245  | Medical Scientists                         | Cross-sectional survey                                                            | 01/15 - 06/15 | The United Kingdom       | 1.9%  | High     |
| Life, Physical, and Social Science Occupations (19-0000) | Anna et al., 2020 <sup>30</sup>    | n=505  | Medical Scientists, Except Epidemiologists | Prospective cohort                                                                | 04/28 - 07/31 | France                   | 8.71% | Moderate |
| Life, Physical, and Social Science Occupations (19-0000) | Erber et al., 2020 <sup>31</sup>   | n=635  | Medical Scientists, Except Epidemiologists | Cross-sectional survey                                                            | 04/14 - 05/29 | Germany                  | 1.24% | High     |
| Life, Physical, and Social Science Occupations (19-0000) | Favara et al., 2020 <sup>19</sup>  | n=38   | Medical Scientists, Except Epidemiologists | Cross-sectional survey                                                            | 07/13 - 07/13 | The United Kingdom       | 2.6%  | High     |
| Life, Physical, and Social Science Occupations (19-0000) | Hanrath et al., 2020 <sup>32</sup> | n=468  | Medical Scientists, Except Epidemiologists | Cross-sectional survey                                                            | 05/29 - 07/06 | The United Kingdom       | 6.2%  | High     |
| Life, Physical, and Social Science Occupations (19-0000) | Leidner et al., 2020 <sup>22</sup> | n=2654 | Medical Scientists, Except Epidemiologists | Cross sectional study with prospective cohort follow up of a subset of the sample | 04/08 - 05/22 | United States of America | 2.22% | High     |

|                                                          |                                        |        |                                            |                                                                                   |               |                          |                 |          |
|----------------------------------------------------------|----------------------------------------|--------|--------------------------------------------|-----------------------------------------------------------------------------------|---------------|--------------------------|-----------------|----------|
| Life, Physical, and Social Science Occupations (19-0000) | Martin et al., 2020 <sup>23</sup>      | n=1154 | Medical Scientists, Except Epidemiologists | Cross-sectional survey                                                            | 05/29 - 07/13 | The United Kingdom       | 9.71%           | Moderate |
| Life, Physical, and Social Science Occupations (19-0000) | Rosser et al., 2020 <sup>33</sup>      | n=102  | Medical Scientists, Except Epidemiologists | Cross-sectional survey                                                            | 04/20 - 05/20 | United States of America | 0.98%           | High     |
| Life, Physical, and Social Science Occupations (19-0000) | Silva et al., 2020 <sup>34</sup>       | n=69   | Chemists                                   | Cross-sectional survey                                                            | 06/05 - 07/31 | Brazil                   | 4%              | High     |
| Life, Physical, and Social Science Occupations (19-0000) | Tsitsilonis et al., 2020 <sup>12</sup> | n=250  | Physical Scientists, All Other             | Cross-sectional survey                                                            | 06/15 - 07/15 | Greece                   | 1.42% (0-7.24%) | Moderate |
| Community and Social Service Occupations (21-0000)       | Jones et al., 2020 <sup>29</sup>       | n=211  | Healthcare Social Workers                  | Cross-sectional survey                                                            | 01/15 - 06/15 | The United Kingdom       | 6.3%            | High     |
| Community and Social Service Occupations (21-0000)       | Leidner et al., 2020 <sup>22</sup>     | n=235  | Social Workers, All Other                  | Cross sectional study with prospective cohort follow up of a subset of the sample | 04/08 - 05/22 | United States of America | 3.4%            | High     |
| Community and Social Service Occupations (21-0000)       | Rosser et al., 2020 <sup>33</sup>      | n=117  | Social Workers, All Other                  | Cross-sectional survey                                                            | 04/20 - 05/20 | United States of America | 1.71%           | High     |
| Community and Social Service Occupations (21-0000)       | Sabourin et al., 2020 <sup>35</sup>    | n=91   | Social Workers, All Other                  | Cross-sectional survey                                                            | 07/15 - 08/15 | United States of America | 5.49%           | High     |
| Community and Social Service                             | Yogo et al., 2020 <sup>36</sup>        | n=35   | Social Workers, All Other                  | Cross-sectional survey                                                            | 05/20 - 06/08 | United States of America | 0%              | High     |

|                                                        |                                        |        |                                       |                        |               |                          |                    |          |
|--------------------------------------------------------|----------------------------------------|--------|---------------------------------------|------------------------|---------------|--------------------------|--------------------|----------|
| Occupations (21-0000)                                  |                                        |        |                                       |                        |               |                          |                    |          |
| Community and Social Service Occupations (21-0000)     | Biggs et al., 2020 <sup>3</sup>        | n=6    | Religious Workers                     | Cross-sectional survey | 04/28 - 05/03 | United States of America | 16.67%             | Moderate |
| Education, Training, and Library Occupations (25-0000) | Campos et al., 2020 <sup>37</sup>      | n=2715 | Postsecondary Teachers                | Cross-sectional survey | 05/13 - 07/10 | Portugal                 | 2.6%               | High     |
| Education, Training, and Library Occupations (25-0000) | Goncalves et al., 2020 <sup>38</sup>   | n=1636 | Postsecondary Teachers                | Cross-sectional survey | 06/15 - 06/30 | Portugal                 | 3.05%              | Moderate |
| Education, Training, and Library Occupations (25-0000) | Tsitsilonis et al., 2020 <sup>12</sup> | n=312  | Postsecondary Teachers                | Cross-sectional survey | 06/15 - 07/15 | Greece                   | 1.2% (0.14-3.7%)   | Moderate |
| Education, Training, and Library Occupations (25-0000) | Fontanet et al., 2020 <sup>39</sup>    | n=42   | Elementary and Middle School Teachers | Retrospective cohort   | 04/28 - 04/30 | France                   | 7.1%               | Moderate |
| Education, Training, and Library Occupations (25-0000) | Siddiqui et al., 2020 <sup>2</sup>     | n=8    | Elementary and Middle School Teachers | Prospective cohort     | 04/15 - 08/15 | India                    | 25%                | High     |
| Education, Training, and Library Occupations (25-0000) | Torres et al., 2020 <sup>40</sup>      | n=165  | Elementary and Middle School Teachers | Cross-sectional survey | 05/04 - 05/19 | Chile                    | 20.6% (14.7-27.6%) | High     |

|                                  |                                                                      |                                     |        |                                                               |                        |               |                          |                    |          |
|----------------------------------|----------------------------------------------------------------------|-------------------------------------|--------|---------------------------------------------------------------|------------------------|---------------|--------------------------|--------------------|----------|
| 1<br>2<br>3<br>4<br>5<br>6<br>7  | Arts, Design, Entertainment, Sports, and Media Occupations (27-0000) | Halatoko et al., 2020 <sup>41</sup> | n=55   | Fine Artists, Including Painters, Sculptors, and Illustrators | Cross-sectional survey | 04/23 - 05/08 | Togo                     | 0%                 | High     |
| 8<br>9<br>10<br>11<br>12<br>13   | Arts, Design, Entertainment, Sports, and Media Occupations (27-0000) | Slusser et al., 2020 <sup>42</sup>  | n=5603 | Athletes, Coaches, Umpires, and Related Workers               | Cross-sectional survey | 04/08 - 04/21 | United States of America | 0.7% (0.28-1.15%)  | Unclear  |
| 14<br>15<br>16<br>17<br>18       | Arts, Design, Entertainment, Sports, and Media Occupations (27-0000) | Vince et al., 2020 <sup>43</sup>    | n=272  | Athletes, Coaches, Umpires, and Related Workers               | Prospective cohort     | 05/29 - 07/31 | Croatia                  | 14%                | Moderate |
| 19<br>20<br>21<br>22<br>23       | Arts, Design, Entertainment, Sports, and Media Occupations (27-0000) | Vince et al., 2020 <sup>43</sup>    | n=43   | Coaches and Scouts                                            | Prospective cohort     | 05/29 - 07/31 | Croatia                  | 16.3%              | Moderate |
| 24<br>25<br>26<br>27<br>28       | Arts, Design, Entertainment, Sports, and Media Occupations (27-0000) | Mack et al., 2020 <sup>44</sup>     | n=1007 | Umpires, Referees, and Other Sports Officials                 | Prospective cohort     | 06/16 - 06/30 | Germany                  | 2.09% (1.37-3.17%) | High     |
| 29<br>30<br>31<br>32<br>33       | Arts, Design, Entertainment, Sports, and Media Occupations (27-0000) | Khan et al., 2020 <sup>45</sup>     | n=44   | Media and Communication Workers                               | Cross-sectional survey | 07/01 - 07/15 | India                    | 0%                 | Moderate |
| 34<br>35<br>36<br>37<br>38<br>39 | Healthcare Practitioners and Technical Occupations (29-0000)         | Akinbami et al., 2020 <sup>46</sup> | n=566  | Healthcare Practitioners and Technical Occupations            | Cross-sectional survey | 05/18 - 06/13 | United States of America | 4.6% (3-6.7%)      | Moderate |

1  
2  
3  
4  
5  
6  
7  
8  
9  
10  
11  
12  
13  
14  
15  
16  
17  
18  
19  
20  
21  
22  
23  
24  
25  
26  
27  
28  
29  
30  
31  
32  
33  
34  
35  
36  
37  
38  
39  
40  
41  
42  
43  
44  
45  
46  
47

|                                                              |                                     |       |                                                                                        |                                                                                   |               |                          |               |          |
|--------------------------------------------------------------|-------------------------------------|-------|----------------------------------------------------------------------------------------|-----------------------------------------------------------------------------------|---------------|--------------------------|---------------|----------|
| Healthcare Practitioners and Technical Occupations (29-0000) | Khan et al., 2020 <sup>45</sup>     | n=355 | Healthcare Practitioners and Technical Occupations                                     | Cross-sectional survey                                                            | 07/01 - 07/15 | India                    | 4.8% (3-7.6%) | Moderate |
| Healthcare Practitioners and Technical Occupations (29-0000) | Leidner et al., 2020 <sup>22</sup>  | n=402 | Healthcare Practitioners and Technical Occupations                                     | Cross sectional study with prospective cohort follow up of a subset of the sample | 04/08 - 05/22 | United States of America | 1.49%         | High     |
| Healthcare Occupations (mixed)*                              | Hanrath et al., 2020 <sup>32</sup>  | n=102 | Healthcare Practitioners and Technical Occupations and Healthcare Support Occupations* | Cross-sectional survey                                                            | 05/29 - 07/06 | The United Kingdom       | 6.62%         | High     |
| Healthcare Occupations (mixed)*                              | Jones et al., 2020 <sup>29</sup>    | n=413 | Healthcare Practitioners and Technical Occupations and Healthcare Support Occupations* | Cross-sectional survey                                                            | 01/15 - 06/15 | The United Kingdom       | 7.8%          | High     |
| Healthcare Occupations (mixed)*                              | Martin et al., 2020 <sup>23</sup>   | n=550 | Healthcare Practitioners and Technical Occupations and Healthcare Support Occupations* | Cross-sectional survey                                                            | 05/29 - 07/13 | The United Kingdom       | 10.36%        | Moderate |
| Healthcare Occupations (mixed)*                              | Amendola et al., 2020 <sup>47</sup> | n=117 | Healthcare Practitioners and Technical Occupations and Healthcare Support Occupations* | Cross-sectional survey                                                            | 04/15 - 04/15 | Italy                    | 4.27%         | High     |
| Healthcare Occupations (mixed)*                              | Arnaldo et al., 2020 <sup>48</sup>  | n=543 | Healthcare Practitioners and Technical Occupations and Healthcare Support Occupations* | Cross-sectional survey                                                            | 08/10 - 08/21 | Mozambique               | 3.7%          | High     |



|                                 |                                     |       |                                                                                        |                        |               |                          |        |          |
|---------------------------------|-------------------------------------|-------|----------------------------------------------------------------------------------------|------------------------|---------------|--------------------------|--------|----------|
| Healthcare Occupations (mixed)* | Bal et al., 2020 <sup>49</sup>      | n=190 | Healthcare Practitioners and Technical Occupations and Healthcare Support Occupations* | Cross-sectional survey | 04/10 - 05/28 | France                   | 3.68%  | High     |
| Healthcare Occupations (mixed)* | Barallat et al., 2020 <sup>50</sup> | n=429 | Healthcare Practitioners and Technical Occupations and Healthcare Support Occupations* | Cross-sectional survey | 05/04 - 05/22 | Spain                    | 7.69%  | High     |
| Healthcare Occupations (mixed)* | Bardai et al., 2020 <sup>51</sup>   | n=35  | Healthcare Practitioners and Technical Occupations and Healthcare Support Occupations* | Cross-sectional survey | 06/10 - 07/27 | Canada                   | 11%    | High     |
| Healthcare Occupations (mixed)* | Bardai et al., 2020 <sup>51</sup>   | n=20  | Healthcare Practitioners and Technical Occupations and Healthcare Support Occupations* | Cross-sectional survey | 06/10 - 07/27 | Canada                   | 15%    | High     |
| Healthcare Occupations (mixed)* | Bardai et al., 2020 <sup>51</sup>   | n=44  | Healthcare Practitioners and Technical Occupations and Healthcare Support Occupations* | Cross-sectional survey | 06/10 - 07/27 | Canada                   | 11%    | High     |
| Healthcare Occupations (mixed)* | Bardai et al., 2020 <sup>51</sup>   | n=99  | Healthcare Practitioners and Technical Occupations and Healthcare Support Occupations* | Cross-sectional survey | 06/10 - 07/27 | Canada                   | 12%    | High     |
| Healthcare Occupations (mixed)* | Biggs et al., 2020 <sup>3</sup>     | n=59  | Healthcare Practitioners and Technical Occupations and Healthcare Support Occupations* | Cross-sectional survey | 04/28 - 05/03 | United States of America | 10.17% | Moderate |

|                                 |                                    |         |                                                                                        |                        |               |                          |                   |          |
|---------------------------------|------------------------------------|---------|----------------------------------------------------------------------------------------|------------------------|---------------|--------------------------|-------------------|----------|
| Healthcare Occupations (mixed)* | Blairon et al., 2020 <sup>52</sup> | n=588   | Healthcare Practitioners and Technical Occupations and Healthcare Support Occupations* | Cross-sectional survey | 05/25 - 06/19 | Belgium                  | 19.2%             | High     |
| Healthcare Occupations (mixed)* | Borraz et al., 2020 <sup>53</sup>  | n=289   | Healthcare Practitioners and Technical Occupations and Healthcare Support Occupations* | Prospective cohort     | 03/20 - 04/21 | Spain                    | 5.88%             | High     |
| Healthcare Occupations (mixed)* | Brunner et al., 2020 <sup>54</sup> | n=762   | Healthcare Practitioners and Technical Occupations and Healthcare Support Occupations* | Cross-sectional survey | 05/04 - 05/29 | United States of America | 4.5%              | High     |
| Healthcare Occupations (mixed)* | Brunner et al., 2020 <sup>54</sup> | n=764   | Healthcare Practitioners and Technical Occupations and Healthcare Support Occupations* | Cross-sectional survey | 05/04 - 05/29 | United States of America | 2%                | High     |
| Healthcare Occupations (mixed)* | Carozzi et al., 2020 <sup>55</sup> | n=17098 | Healthcare Practitioners and Technical Occupations and Healthcare Support Occupations* | Cross-sectional survey | 04/01 - 04/30 | Italy                    | 3.1%              | High     |
| Healthcare Occupations (mixed)* | Carrat et al., 2020 <sup>4</sup>   | n=568   | Healthcare Practitioners and Technical Occupations and Healthcare Support Occupations* | Prospective cohort     | 05/04 - 06/23 | France                   | 11.6% (8.3-14.4%) | Moderate |
| Healthcare Occupations (mixed)* | Cavlek et al., 2020 <sup>56</sup>  | n=558   | Healthcare Practitioners and Technical Occupations and Healthcare Support Occupations* | Cross-sectional survey | 04/25 - 05/24 | Croatia                  | 1.25%             | High     |

|                                 |                                     |        |                                                                                        |                        |               |                          |                   |          |
|---------------------------------|-------------------------------------|--------|----------------------------------------------------------------------------------------|------------------------|---------------|--------------------------|-------------------|----------|
| Healthcare Occupations (mixed)* | Chibwana et al., 2020 <sup>57</sup> | n=500  | Healthcare Practitioners and Technical Occupations and Healthcare Support Occupations* | Prospective cohort     | 05/22 - 06/19 | Malawi                   | 12.3% (8.2-16.5%) | High     |
| Healthcare Occupations (mixed)* | Coffman et al., 2020 <sup>58</sup>  | n=1100 | Healthcare Practitioners and Technical Occupations and Healthcare Support Occupations* | Cross-sectional survey | 07/01 - 07/31 | United States of America | 2.2%              | Unclear  |
| Healthcare Occupations (mixed)* | Cooper et al., 2020 <sup>59</sup>   | n=118  | Healthcare Practitioners and Technical Occupations and Healthcare Support Occupations* | Cross-sectional survey | 06/10 - 08/07 | The United Kingdom       | 8.47%             | Moderate |
| Healthcare Occupations (mixed)* | Cooper et al., 2020 <sup>59</sup>   | n=27   | Healthcare Practitioners and Technical Occupations and Healthcare Support Occupations* | Cross-sectional survey | 06/10 - 08/07 | The United Kingdom       | 14.81%            | Moderate |
| Healthcare Occupations (mixed)* | Cooper et al., 2020 <sup>59</sup>   | n=24   | Healthcare Practitioners and Technical Occupations and Healthcare Support Occupations* | Cross-sectional survey | 06/10 - 08/07 | The United Kingdom       | 12.5%             | Moderate |
| Healthcare Occupations (mixed)* | Cooper et al., 2020 <sup>59</sup>   | n=1068 | Healthcare Practitioners and Technical Occupations and Healthcare Support Occupations* | Cross-sectional survey | 06/10 - 08/07 | The United Kingdom       | 5.43%             | Moderate |
| Healthcare Occupations (mixed)* | Cooper et al., 2020 <sup>59</sup>   | n=174  | Healthcare Practitioners and Technical Occupations and Healthcare Support Occupations* | Cross-sectional survey | 06/10 - 08/07 | The United Kingdom       | 5.75%             | Moderate |

|                                 |                                     |        |                                                                                        |                        |               |                    |                  |          |
|---------------------------------|-------------------------------------|--------|----------------------------------------------------------------------------------------|------------------------|---------------|--------------------|------------------|----------|
| Healthcare Occupations (mixed)* | Cooper et al., 2020 <sup>59</sup>   | n=319  | Healthcare Practitioners and Technical Occupations and Healthcare Support Occupations* | Cross-sectional survey | 06/10 - 08/07 | The United Kingdom | 11.29%           | Moderate |
| Healthcare Occupations (mixed)* | Cooper et al., 2020 <sup>59</sup>   | n=5698 | Healthcare Practitioners and Technical Occupations and Healthcare Support Occupations* | Cross-sectional survey | 06/10 - 08/07 | The United Kingdom | 7.2%             | Moderate |
| Healthcare Occupations (mixed)* | Cooper et al., 2020 <sup>59</sup>   | n=412  | Healthcare Practitioners and Technical Occupations and Healthcare Support Occupations* | Cross-sectional survey | 06/10 - 08/07 | The United Kingdom | 4.61%            | Moderate |
| Healthcare Occupations (mixed)* | Denyer et al., 2020 <sup>60</sup>   | n=5850 | Healthcare Practitioners and Technical Occupations and Healthcare Support Occupations* | Cross-sectional survey | 05/12 - 05/18 | Japan              | 1.79%            | Unclear  |
| Healthcare Occupations (mixed)* | Dimeglio et al., 2020 <sup>61</sup> | n=8758 | Healthcare Practitioners and Technical Occupations and Healthcare Support Occupations* | Cross-sectional survey | 06/10 - 07/10 | France             | 3.2% (2.8-3.5%)  | High     |
| Healthcare Occupations (mixed)* | Erber et al., 2020 <sup>31</sup>    | n=603  | Healthcare Practitioners and Technical Occupations and Healthcare Support Occupations* | Cross-sectional survey | 04/14 - 05/29 | Germany            | 2.8%             | High     |
| Healthcare Occupations (mixed)* | Fuereder et al., 2020 <sup>62</sup> | n=62   | Healthcare Practitioners and Technical Occupations and Healthcare Support Occupations* | Retrospective cohort   | 04/01 - 06/04 | Austria            | 3.2% (0.4-11.2%) | High     |

|                                 |                                     |        |                                                                                        |                                |               |                          |                    |          |
|---------------------------------|-------------------------------------|--------|----------------------------------------------------------------------------------------|--------------------------------|---------------|--------------------------|--------------------|----------|
| Healthcare Occupations (mixed)* | Fusco et al., 2020 <sup>63</sup>    | n=115  | Healthcare Practitioners and Technical Occupations and Healthcare Support Occupations* | Cross-sectional survey         | 03/23 - 04/02 | Italy                    | 1.74%              | High     |
| Healthcare Occupations (mixed)* | Geraci et al., 2020 <sup>64</sup>   | n=230  | Healthcare Practitioners and Technical Occupations and Healthcare Support Occupations* | Cross-sectional survey         | 03/16 - 05/20 | United States of America | 2.17%              | High     |
| Healthcare Occupations (mixed)* | Gudo et al., 2020 <sup>65</sup>     | n=1427 | Healthcare Practitioners and Technical Occupations and Healthcare Support Occupations* | Cross-sectional survey         | 06/17 - 06/30 | Mozambique               | 7% (6-9%)          | High     |
| Healthcare Occupations (mixed)* | Hackner et al., 2020 <sup>66</sup>  | n=130  | Healthcare Practitioners and Technical Occupations and Healthcare Support Occupations* | Cross-sectional survey         | 04/01 - 04/30 | Austria                  | 2.3%               | High     |
| Healthcare Occupations (mixed)* | Halatoko et al., 2020 <sup>41</sup> | n=370  | Healthcare Practitioners and Technical Occupations and Healthcare Support Occupations* | Cross-sectional survey         | 04/23 - 05/08 | Togo                     | 1.4%               | High     |
| Healthcare Occupations (mixed)* | Haq et al., 2020 <sup>67</sup>      | n=76   | Healthcare Practitioners and Technical Occupations and Healthcare Support Occupations* | Cross-sectional survey         | 06/15 - 06/29 | Pakistan                 | 35.5% (24.8-47.3%) | Moderate |
| Healthcare Occupations (mixed)* | He et al., 2020 <sup>68</sup>       | n=1059 | Healthcare Practitioners and Technical Occupations and Healthcare Support Occupations* | Repeated cross sectional study | 05/13 - 06/10 | China                    | 9.3%               | High     |

|                                 |                                      |         |                                                                                        |                                |               |                          |                    |          |
|---------------------------------|--------------------------------------|---------|----------------------------------------------------------------------------------------|--------------------------------|---------------|--------------------------|--------------------|----------|
| Healthcare Occupations (mixed)* | Herzberg et al., 2020 <sup>69</sup>  | n=871   | Healthcare Practitioners and Technical Occupations and Healthcare Support Occupations* | Prospective cohort             | 04/14 - 06/16 | Germany                  | 2.64%              | High     |
| Healthcare Occupations (mixed)* | Jeremias et al., 2020 <sup>70</sup>  | n=100   | Healthcare Practitioners and Technical Occupations and Healthcare Support Occupations* | Cross-sectional survey         | 03/01 - 04/30 | United States of America | 12%                | High     |
| Healthcare Occupations (mixed)* | Jespersen et al., 2020 <sup>71</sup> | n=17948 | Healthcare Practitioners and Technical Occupations and Healthcare Support Occupations* | Cross-sectional survey         | 05/18 - 06/19 | Denmark                  | 3.36% (2.38-3.82%) | Moderate |
| Healthcare Occupations (mixed)* | Kassem et al., 2020 <sup>72</sup>    | n=74    | Healthcare Practitioners and Technical Occupations and Healthcare Support Occupations* | Cross-sectional survey         | 06/01 - 06/14 | Egypt                    | 12.2%              | High     |
| Healthcare Occupations (mixed)* | Kern et al., 2020 <sup>73</sup>      | n=1316  | Healthcare Practitioners and Technical Occupations and Healthcare Support Occupations* | Cross-sectional survey         | 04/09 - 04/16 | Germany                  | 1.06% (0.58-1.78%) | High     |
| Healthcare Occupations (mixed)* | Khalil et al., 2020 <sup>74</sup>    | n=190   | Healthcare Practitioners and Technical Occupations and Healthcare Support Occupations* | Cross-sectional survey         | 05/15 - 05/28 | The United Kingdom       | 22%                | High     |
| Healthcare Occupations (mixed)* | Kumar et al., 2020 <sup>75</sup>     | n=635   | Healthcare Practitioners and Technical Occupations and Healthcare Support Occupations* | Repeated cross sectional study | 07/11 - 07/24 | India                    | 0%                 | High     |

|                                 |                                       |        |                                                                                        |                        |               |            |                 |          |
|---------------------------------|---------------------------------------|--------|----------------------------------------------------------------------------------------|------------------------|---------------|------------|-----------------|----------|
| Healthcare Occupations (mixed)* | Lackermair et al., 2020 <sup>76</sup> | n=151  | Healthcare Practitioners and Technical Occupations and Healthcare Support Occupations* | Cross-sectional survey | 04/02 - 04/06 | Germany    | 2.6% (0.8-7.1%) | High     |
| Healthcare Occupations (mixed)* | Lahner et al., 2020 <sup>77</sup>     | n=1084 | Healthcare Practitioners and Technical Occupations and Healthcare Support Occupations* | Cross-sectional survey | 04/07 - 04/27 | Italy      | 0.7%            | High     |
| Healthcare Occupations (mixed)* | Liu et al., 2020 <sup>78</sup>        | n=116  | Healthcare Practitioners and Technical Occupations and Healthcare Support Occupations* | Cross-sectional survey | 02/07 - 04/21 | China      | 0%              | High     |
| Healthcare Occupations (mixed)* | Liu et al., 2020 <sup>78</sup>        | n=304  | Healthcare Practitioners and Technical Occupations and Healthcare Support Occupations* | Cross-sectional survey | 02/07 - 04/21 | China      | 0%              | High     |
| Healthcare Occupations (mixed)* | Liu et al., 2020 <sup>79</sup>        | n=3832 | Healthcare Practitioners and Technical Occupations and Healthcare Support Occupations* | Cross-sectional survey | 02/29 - 04/29 | China      | 4% (3.4-4.7%)   | Moderate |
| Healthcare Occupations (mixed)* | Lorenzo et al., 2020 <sup>80</sup>    | n=38   | Healthcare Practitioners and Technical Occupations and Healthcare Support Occupations* | Cross-sectional survey | 05/02 - 05/31 | Italy      | 5.3%            | High     |
| Healthcare Occupations (mixed)* | Mahomed et al., 2020 <sup>81</sup>    | n=569  | Healthcare Practitioners and Technical Occupations and Healthcare Support Occupations* | Cross-sectional survey | 08/31 - 10/12 | Mozambique | 0.7%            | High     |

|                                 |                                          |        |                                                                                        |                        |               |                    |                |          |
|---------------------------------|------------------------------------------|--------|----------------------------------------------------------------------------------------|------------------------|---------------|--------------------|----------------|----------|
| Healthcare Occupations (mixed)* | Mahumane et al., 2020 <sup>82</sup>      | n=380  | Healthcare Practitioners and Technical Occupations and Healthcare Support Occupations* | Cross-sectional survey | 11/02 - 11/17 | Mozambique         | 1.3%           | High     |
| Healthcare Occupations (mixed)* | Majdoubi et al., 2020 <sup>83</sup>      | n=276  | Healthcare Practitioners and Technical Occupations and Healthcare Support Occupations* | Cross-sectional survey | 05/17 - 06/19 | Canada             | 0.6% (0-2.71%) | High     |
| Healthcare Occupations (mixed)* | Majiya et al., 2020 <sup>84</sup>        | n=185  | Healthcare Practitioners and Technical Occupations and Healthcare Support Occupations* | Cross-sectional survey | 06/26 - 06/30 | Nigeria            | 25.41%         | Moderate |
| Healthcare Occupations (mixed)* | Majiya et al., 2020 <sup>84</sup>        | n=43   | Healthcare Practitioners and Technical Occupations and Healthcare Support Occupations* | Cross-sectional survey | 06/26 - 06/30 | Nigeria            | 37.21%         | Moderate |
| Healthcare Occupations (mixed)* | Malfertheiner et al., 2020 <sup>85</sup> | n=139  | Healthcare Practitioners and Technical Occupations and Healthcare Support Occupations* | Prospective cohort     | 03/15 - 06/07 | Germany            | 0%             | High     |
| Healthcare Occupations (mixed)* | Martin et al., 2020 <sup>86</sup>        | n=326  | Healthcare Practitioners and Technical Occupations and Healthcare Support Occupations* | Cross-sectional survey | 04/15 - 05/18 | Belgium            | 11%            | High     |
| Healthcare Occupations (mixed)* | Martin et al., 2020 <sup>23</sup>        | n=4631 | Healthcare Practitioners and Technical Occupations and Healthcare Support Occupations* | Cross-sectional survey | 05/29 - 07/13 | The United Kingdom | 13.65%         | Moderate |



|                                 |                                      |        |                                                                                        |                        |               |                          |                   |          |
|---------------------------------|--------------------------------------|--------|----------------------------------------------------------------------------------------|------------------------|---------------|--------------------------|-------------------|----------|
| Healthcare Occupations (mixed)* | Melo et al., 2020 <sup>87</sup>      | n=471  | Healthcare Practitioners and Technical Occupations and Healthcare Support Occupations* | Cross-sectional survey | 06/01 - 06/30 | Brazil                   | 13.59%            | High     |
| Healthcare Occupations (mixed)* | Morcuende et al., 2020 <sup>88</sup> | n=6    | Healthcare Practitioners and Technical Occupations and Healthcare Support Occupations* | Cross-sectional survey | 03/01 - 04/21 | United States of America | 0%                | High     |
| Healthcare Occupations (mixed)* | Moscola et al., 2020 <sup>89</sup>   | n=8156 | Healthcare Practitioners and Technical Occupations and Healthcare Support Occupations* | Cross-sectional survey | 04/20 - 06/23 | United States of America | 11.6%             | High     |
| Healthcare Occupations (mixed)* | Nishida et al., 2020 <sup>90</sup>   | n=49   | Healthcare Practitioners and Technical Occupations and Healthcare Support Occupations* | Cross-sectional survey | 06/12 - 06/19 | Japan                    | 0%                | Moderate |
| Healthcare Occupations (mixed)* | Olalla et al., 2020 <sup>91</sup>    | n=498  | Healthcare Practitioners and Technical Occupations and Healthcare Support Occupations* | Cross-sectional survey | 04/15 - 04/25 | Spain                    | 2.2%              | High     |
| Healthcare Occupations (mixed)* | Pallett et al., 2020 <sup>92</sup>   | n=504  | Healthcare Practitioners and Technical Occupations and Healthcare Support Occupations* | Prospective cohort     | 04/08 - 06/12 | The United Kingdom       | 10.6% (7.6-13.6%) | High     |
| Healthcare Occupations (mixed)* | Pere et al., 2020 <sup>93</sup>      | n=3569 | Healthcare Practitioners and Technical Occupations and Healthcare Support Occupations* | Cross-sectional survey | 05/02 - 06/26 | France                   | 11.9%             | High     |

|                                 |                                       |        |                                                                                        |                        |               |                            |                    |          |
|---------------------------------|---------------------------------------|--------|----------------------------------------------------------------------------------------|------------------------|---------------|----------------------------|--------------------|----------|
| Healthcare Occupations (mixed)* | Poulikakos et al., 2020 <sup>94</sup> | n=281  | Healthcare Practitioners and Technical Occupations and Healthcare Support Occupations* | Cross-sectional survey | 05/04 - 05/06 | The United Kingdom         | 6%                 | High     |
| Healthcare Occupations (mixed)* | Psichogiou et al., 2020 <sup>95</sup> | n=1495 | Healthcare Practitioners and Technical Occupations and Healthcare Support Occupations* | Cross-sectional survey | 04/13 - 05/15 | Greece                     | 1.26% (0.43-3.26%) | Moderate |
| Healthcare Occupations (mixed)* | Satpati et al., 2020 <sup>27</sup>    | n=18   | Healthcare Practitioners and Technical Occupations and Healthcare Support Occupations* | Cross-sectional survey | 07/26 - 08/08 | India                      | 5.56%              | Moderate |
| Healthcare Occupations (mixed)* | Seetharam et al., 2020 <sup>96</sup>  | n=728  | Healthcare Practitioners and Technical Occupations and Healthcare Support Occupations* | Cross-sectional survey | 08/16 - 08/29 | India                      | 27.3% (24.1-30.6%) | Unclear  |
| Healthcare Occupations (mixed)* | Shakiba et al., 2020 <sup>10</sup>    | n=43   | Healthcare Practitioners and Technical Occupations and Healthcare Support Occupations* | Cross-sectional survey | 04/11 - 04/19 | Iran (Islamic Republic of) | 14.5% (4.5-25%)    | Moderate |
| Healthcare Occupations (mixed)* | Shields et al., 2020 <sup>97</sup>    | n=516  | Healthcare Practitioners and Technical Occupations and Healthcare Support Occupations* | Cross-sectional survey | 04/24 - 04/25 | The United Kingdom         | 24.4%              | High     |
| Healthcare Occupations (mixed)* | Silva et al., 2020 <sup>98</sup>      | n=61   | Healthcare Practitioners and Technical Occupations and Healthcare Support Occupations* | Cross-sectional survey | 04/09 - 04/29 | Brazil                     | 4.91%              | High     |

|                                 |                                        |         |                                                                                        |                        |               |                          |                 |         |
|---------------------------------|----------------------------------------|---------|----------------------------------------------------------------------------------------|------------------------|---------------|--------------------------|-----------------|---------|
| Healthcare Occupations (mixed)* | Solodky et al., 2020 <sup>99</sup>     | n=85    | Healthcare Practitioners and Technical Occupations and Healthcare Support Occupations* | Cross-sectional survey | 03/01 - 04/16 | France                   | 5.88%           | High    |
| Healthcare Occupations (mixed)* | Soriano et al., 2020 <sup>100</sup>    | n=108   | Healthcare Practitioners and Technical Occupations and Healthcare Support Occupations* | Retrospective cohort   | 04/26 - 05/16 | Spain                    | 13%             | High    |
| Healthcare Occupations (mixed)* | Statistica et al., 2020 <sup>101</sup> | n=64660 | Healthcare Practitioners and Technical Occupations and Healthcare Support Occupations* | Cross-sectional survey | 05/25 - 07/15 | Italy                    | 2.5%            | Unclear |
| Healthcare Occupations (mixed)* | Steensels et al., 2020 <sup>102</sup>  | n=3056  | Healthcare Practitioners and Technical Occupations and Healthcare Support Occupations* | Cross-sectional survey | 04/22 - 04/30 | Belgium                  | 6.4% (5.5-7.3%) | High    |
| Healthcare Occupations (mixed)* | Stock et al., 2020 <sup>103</sup>      | n=98    | Healthcare Practitioners and Technical Occupations and Healthcare Support Occupations* | Cross-sectional survey | 04/04 - 04/20 | United States of America | 15.3%           | High    |
| Healthcare Occupations (mixed)* | Takita et al., 2020 <sup>104</sup>     | n=175   | Healthcare Practitioners and Technical Occupations and Healthcare Support Occupations* | Cross-sectional survey | 04/20 - 05/20 | Japan                    | 4% (1.62-8.07%) | High    |
| Healthcare Occupations (mixed)* | Tong et al., 2020 <sup>105</sup>       | n=191   | Healthcare Practitioners and Technical Occupations and Healthcare Support Occupations* | Cross-sectional survey | 05/12 - 05/15 | China                    | 0%              | High    |

|                                 |                                                |        |                                                                                        |                                                                                   |               |            |        |      |
|---------------------------------|------------------------------------------------|--------|----------------------------------------------------------------------------------------|-----------------------------------------------------------------------------------|---------------|------------|--------|------|
| Healthcare Occupations (mixed)* | Trieu et al., 2020 <sup>106</sup>              | n=607  | Healthcare Practitioners and Technical Occupations and Healthcare Support Occupations* | Prospective cohort                                                                | 03/06 - 04/09 | Norway     | 5.27%  | High |
| Healthcare Occupations (mixed)* | Tu et al., 2020 <sup>107</sup>                 | n=325  | Healthcare Practitioners and Technical Occupations and Healthcare Support Occupations* | Cross sectional study with prospective cohort follow up of a subset of the sample | 03/19 - 03/20 | China      | 43.08% | High |
| Healthcare Occupations (mixed)* | Valdivia et al., 2020 <sup>108</sup>           | n=1153 | Healthcare Practitioners and Technical Occupations and Healthcare Support Occupations* | Cross-sectional survey                                                            | 04/13 - 04/30 | Spain      | 3.5%   | High |
| Healthcare Occupations (mixed)* | Vasquez et al., 2020 <sup>109</sup>            | n=1147 | Healthcare Practitioners and Technical Occupations and Healthcare Support Occupations* | Cross-sectional survey                                                            | 05/19 - 06/06 | Peru       | 58.3%  | High |
| Healthcare Occupations (mixed)* | Viegas et al., 2020 <sup>110</sup>             | n=1443 | Healthcare Practitioners and Technical Occupations and Healthcare Support Occupations* | Cross-sectional survey                                                            | 08/03 - 08/21 | Mozambique | 2.63%  | High |
| Healthcare Occupations (mixed)* | Vlachoyiannopoulou et al., 2020 <sup>111</sup> | n=321  | Healthcare Practitioners and Technical Occupations and Healthcare Support Occupations* | Cross-sectional survey                                                            | 04/25 - 05/10 | Greece     | 2.18%  | High |
| Healthcare Occupations (mixed)* | Volta et al., 2020 <sup>112</sup>              | n=76   | Healthcare Practitioners and Technical Occupations and Healthcare Support Occupations* | Cross-sectional survey                                                            | 04/27 - 04/27 | Italy      | 11.8%  | High |

|                                 |                                      |        |                                                                                                                |                        |               |                          |        |          |
|---------------------------------|--------------------------------------|--------|----------------------------------------------------------------------------------------------------------------|------------------------|---------------|--------------------------|--------|----------|
| Healthcare Occupations (mixed)* | Ward et al., 2020 <sup>113</sup>     | n=5416 | Healthcare Practitioners and Technical Occupations and Healthcare Support Occupations*                         | Cross-sectional survey | 09/15 - 09/28 | The United Kingdom       | 10.67% | Moderate |
| Healthcare Occupations (mixed)* | Ward et al., 2020 <sup>113</sup>     | n=1692 | Healthcare Practitioners and Technical Occupations and Healthcare Support Occupations*                         | Cross-sectional survey | 09/15 - 09/28 | The United Kingdom       | 6.68%  | Moderate |
| Healthcare Occupations (mixed)* | Xiong et al., 2020 <sup>114</sup>    | n=797  | Healthcare Practitioners and Technical Occupations and Healthcare Support Occupations*                         | Cross-sectional survey | 02/12 - 03/17 | China                    | 4.39%  | Unclear  |
| Healthcare Occupations (mixed)* | Zhang et al., 2020 <sup>115</sup>    | n=63   | Healthcare Practitioners and Technical Occupations and Healthcare Support Occupations*                         | Cross-sectional survey | 01/21 - 02/16 | China                    | 0%     | High     |
| Healthcare Occupations (mixed)* | Zhao et al., 2020 <sup>116</sup>     | n=1060 | Healthcare Practitioners and Technical Occupations and Healthcare Support Occupations*                         | Cross-sectional survey | 01/14 - 02/21 | China                    | 8.3%   | High     |
| First responders (mixed)*       | Ahmad et al., 2020 <sup>117</sup>    | n=40   | Healthcare Practitioners and Technical Occupations and Protective Service Occupations (i.e. first responders)* | Cross-sectional survey | 04/21 - 05/22 | United States of America | 20%    | High     |
| First responders (mixed)*       | Halbrook et al., 2020 <sup>118</sup> | n=679  | Healthcare Practitioners and Technical Occupations and Protective Service Occupations (i.e. first responders)* | Cross-sectional survey | 05/19 - 08/31 | United States of America | 8.1%   | Moderate |

|                                                          |                                                              |                                         |       |                                                                                                                |                        |               |                          |                    |          |
|----------------------------------------------------------|--------------------------------------------------------------|-----------------------------------------|-------|----------------------------------------------------------------------------------------------------------------|------------------------|---------------|--------------------------|--------------------|----------|
| 1<br>2<br>3<br>4<br>5<br>6<br>7<br>8<br>9                | First responders (mixed)*                                    | Iwuji et al., 2020 <sup>119</sup>       | n=683 | Healthcare Practitioners and Technical Occupations and Protective Service Occupations (i.e. first responders)* | Cross-sectional survey | 05/12 - 05/13 | United States of America | 0.7%               | High     |
| 10<br>11<br>12<br>13<br>14<br>15                         | First responders (mixed)*                                    | Magyar et al., 2020 <sup>120</sup>      | n=70  | Healthcare Practitioners and Technical Occupations and Protective Service Occupations (i.e. first responders)* | Cross-sectional survey | 05/01 - 05/14 | United States of America | 4.29%              | High     |
| 16<br>17<br>18<br>19<br>20<br>21                         | First responders (mixed)*                                    | Martinez et al., 2020 <sup>121</sup>    | n=79  | Healthcare Practitioners and Technical Occupations and Protective Service Occupations (i.e. first responders)* | Cross-sectional survey | 04/16 - 04/17 | United States of America | 5.06%              | High     |
| 22<br>23<br>24<br>25<br>26<br>27                         | First responders (mixed)*                                    | Staletovich et al., 2020 <sup>122</sup> | n=359 | Healthcare Practitioners and Technical Occupations and Protective Service Occupations (i.e. first responders)* | Cross-sectional survey | 05/17 - 05/22 | United States of America | 0%                 | Unclear  |
| 28<br>29<br>30<br>31<br>32                               | Healthcare Practitioners and Technical Occupations (29-0000) | Hibino et al., 2020 <sup>123</sup>      | n=806 | Health Diagnosing and Treating Practitioners                                                                   | Cross-sectional survey | 06/01 - 07/30 | Japan                    | 0.74% (0.27-1.61%) | Unclear  |
| 33<br>34<br>35<br>36<br>37                               | Healthcare Practitioners and Technical Occupations (29-0000) | Jones et al., 2020 <sup>29</sup>        | n=856 | Dentists, General                                                                                              | Cross-sectional survey | 01/15 - 06/15 | The United Kingdom       | 7.9%               | High     |
| 38<br>39<br>40<br>41<br>42<br>43<br>44<br>45<br>46<br>47 | Life, Physical, and Social Science                           | Calcagno et al., 2020 <sup>124</sup>    | n=343 | Life, Physical, and Social Science Occupations                                                                 | Cross-sectional survey | 04/17 - 05/20 | Italy                    | 6.71%              | Moderate |

|                                                              |                                      |       |                              |                        |               |                          |                 |          |
|--------------------------------------------------------------|--------------------------------------|-------|------------------------------|------------------------|---------------|--------------------------|-----------------|----------|
| Occupations (19-0000)                                        |                                      |       |                              |                        |               |                          |                 |          |
| Healthcare Practitioners and Technical Occupations (29-0000) | Goenka et al., 2020 <sup>25</sup>    | n=49  | Dietitians and Nutritionists | Cross-sectional survey | 07/12 - 08/23 | India                    | 18.37%          | Moderate |
| Healthcare Practitioners and Technical Occupations (29-0000) | Goenka et al., 2020 <sup>26</sup>    | n=6   | Dietitians and Nutritionists | Cross-sectional survey | 08/01 - 08/31 | India                    | 0%              | High     |
| Healthcare Practitioners and Technical Occupations (29-0000) | Akinbami et al., 2020 <sup>46</sup>  | n=321 | Pharmacists                  | Cross-sectional survey | 05/18 - 06/13 | United States of America | 4.4% (2.4-7.2%) | Moderate |
| Healthcare Practitioners and Technical Occupations (29-0000) | Alharbi et al., 2020 <sup>125</sup>  | n=5   | Pharmacists                  | Cross-sectional survey | 04/18 - 06/17 | Saudi Arabia             | 0%              | High     |
| Healthcare Practitioners and Technical Occupations (29-0000) | Calcagno et al., 2020 <sup>124</sup> | n=29  | Pharmacists                  | Cross-sectional survey | 04/17 - 05/20 | Italy                    | 3.45%           | Moderate |
| Healthcare Practitioners and Technical Occupations (29-0000) | Chau et al., 2020 <sup>126</sup>     | n=17  | Pharmacists                  | Cross-sectional survey | 08/23 - 08/30 | Viet Nam                 | 0%              | High     |
| Healthcare Practitioners and Technical Occupations (29-0000) | Hanrath et al., 2020 <sup>32</sup>   | n=189 | Pharmacists                  | Cross-sectional survey | 05/29 - 07/06 | The United Kingdom       | 4.76%           | High     |

|                                                              |                                    |       |                         |                        |               |                          |                 |          |
|--------------------------------------------------------------|------------------------------------|-------|-------------------------|------------------------|---------------|--------------------------|-----------------|----------|
| Healthcare Practitioners and Technical Occupations (29-0000) | Khan et al., 2020 <sup>127</sup>   | n=109 | Pharmacists             | Cross-sectional survey | 06/15 - 06/29 | India                    | 0%              | Moderate |
| Healthcare Practitioners and Technical Occupations (29-0000) | Mahomed et al., 2020 <sup>81</sup> | n=404 | Pharmacists             | Cross-sectional survey | 08/31 - 10/12 | Mozambique               | 0.5%            | High     |
| Healthcare Practitioners and Technical Occupations (29-0000) | Martin et al., 2020 <sup>23</sup>  | n=113 | Pharmacists             | Cross-sectional survey | 05/29 - 07/13 | The United Kingdom       | 0%              | Moderate |
| Healthcare Practitioners and Technical Occupations (29-0000) | Rosser et al., 2020 <sup>33</sup>  | n=213 | Pharmacists             | Cross-sectional survey | 04/20 - 05/20 | United States of America | 1.88%           | High     |
| Healthcare Practitioners and Technical Occupations (29-0000) | Costa et al., 2020 <sup>128</sup>  | n=652 | Physicians and Surgeons | Cross-sectional survey | 05/14 - 05/28 | Brazil                   | 5.8%            | Moderate |
| Healthcare Practitioners and Technical Occupations (29-0000) | Mohr et al., 2020 <sup>129</sup>   | n=372 | Physicians and Surgeons | Cross-sectional survey | 05/13 - 07/08 | United States of America | 1.61%           | Moderate |
| Healthcare Practitioners and Technical Occupations (29-0000) | Nishida et al., 2020 <sup>90</sup> | n=63  | Physicians and Surgeons | Cross-sectional survey | 06/12 - 06/19 | Japan                    | 3.2% (0.88-11%) | Moderate |
| Healthcare Practitioners and                                 | Noor et al., 2020 <sup>130</sup>   | n=157 | Physicians and Surgeons | Cross-sectional survey | 07/13 - 07/15 | Pakistan                 | 17.83%          | Moderate |



|                                                              |                                      |        |                                    |                                                                                   |               |                          |                 |          |
|--------------------------------------------------------------|--------------------------------------|--------|------------------------------------|-----------------------------------------------------------------------------------|---------------|--------------------------|-----------------|----------|
| Technical Occupations (29-0000)                              |                                      |        |                                    |                                                                                   |               |                          |                 |          |
| Healthcare Practitioners and Technical Occupations (29-0000) | Singhal et al., 2020 <sup>131</sup>  | n=208  | Physicians and Surgeons            | Cross-sectional survey                                                            | 06/01 - 06/30 | India                    | 12.5%           | High     |
| Healthcare Practitioners and Technical Occupations (29-0000) | Morcuende et al., 2020 <sup>88</sup> | n=23   | Anesthesiologists                  | Cross-sectional survey                                                            | 03/01 - 04/21 | United States of America | 13.04%          | High     |
| Healthcare Practitioners and Technical Occupations (29-0000) | Morcuende et al., 2020 <sup>88</sup> | n=3    | Obstetricians and Gynecologists    | Cross-sectional survey                                                            | 03/01 - 04/21 | United States of America | 100%            | High     |
| Healthcare Practitioners and Technical Occupations (29-0000) | Urbietta et al., 2020 <sup>132</sup> | n=23   | Pediatricians, General             | Cross-sectional survey                                                            | 04/14 - 04/16 | Spain                    | 4.3%            | High     |
| Healthcare Practitioners and Technical Occupations (29-0000) | Iversen et al., 2020 <sup>8</sup>    | n=1944 | Psychiatrists                      | Cross-sectional survey                                                            | 04/15 - 04/22 | Denmark                  | 1.85%           | Low      |
| Healthcare Practitioners and Technical Occupations (29-0000) | Leidner et al., 2020 <sup>22</sup>   | n=301  | Surgeons                           | Cross sectional study with prospective cohort follow up of a subset of the sample | 04/08 - 05/22 | United States of America | 2.66%           | High     |
| Healthcare Practitioners and Technical                       | Akinbami et al., 2020 <sup>46</sup>  | n=2297 | Physicians and Surgeons, All Other | Cross-sectional survey                                                            | 05/18 - 06/13 | United States of America | 6.1% (5.1-7.1%) | Moderate |

|                                                              |                                     |        |                                    |                                                              |               |              |        |          |
|--------------------------------------------------------------|-------------------------------------|--------|------------------------------------|--------------------------------------------------------------|---------------|--------------|--------|----------|
| Occupations (29-0000)                                        |                                     |        |                                    |                                                              |               |              |        |          |
| Healthcare Practitioners and Technical Occupations (29-0000) | Alharbi et al., 2020 <sup>125</sup> | n=18   | Physicians and Surgeons, All Other | Cross-sectional survey                                       | 04/18 - 06/17 | Saudi Arabia | 27.78% | High     |
| Healthcare Practitioners and Technical Occupations (29-0000) | Amendola et al., 2020 <sup>47</sup> | n=214  | Physicians and Surgeons, All Other | Cross-sectional survey                                       | 04/15 - 04/15 | Italy        | 4.67%  | High     |
| Healthcare Practitioners and Technical Occupations (29-0000) | Baracco et al., 2020 <sup>24</sup>  | n=417  | Physicians and Surgeons, All Other | Cross-sectional survey                                       | 04/23 - 05/05 | Italy        | 17%    | High     |
| Healthcare Practitioners and Technical Occupations (29-0000) | Barallat et al., 2020 <sup>50</sup> | n=1821 | Physicians and Surgeons, All Other | Cross-sectional survey                                       | 05/04 - 05/22 | Spain        | 11.81% | High     |
| Healthcare Practitioners and Technical Occupations (29-0000) | Bianchi et al., 2020 <sup>133</sup> | n=34   | Physicians and Surgeons, All Other | Cross-sectional survey                                       | 04/15 - 05/15 | Italy        | 5.88%  | Unclear  |
| Healthcare Practitioners and Technical Occupations (29-0000) | Blairon et al., 2020 <sup>52</sup>  | n=323  | Physicians and Surgeons, All Other | Cross-sectional survey                                       | 05/25 - 06/19 | Belgium      | 11.8%  | High     |
| Healthcare Practitioners and Technical Occupations (29-0000) | Brehm et al., 2020 <sup>7</sup>     | n=275  | Physicians and Surgeons, All Other | Cross sectional study with prospective cohort follow up of a | 03/20 - 07/17 | Germany      | 3.3%   | Moderate |

|                                                              |                                       |       |                                    |                        |               |                    |        |          |
|--------------------------------------------------------------|---------------------------------------|-------|------------------------------------|------------------------|---------------|--------------------|--------|----------|
|                                                              |                                       |       |                                    | subset of the sample   |               |                    |        |          |
| Healthcare Practitioners and Technical Occupations (29-0000) | Brousseau et al., 2020 <sup>134</sup> | n=432 | Physicians and Surgeons, All Other | Cross-sectional survey | 07/06 - 09/24 | Canada             | 7.2%   | High     |
| Healthcare Practitioners and Technical Occupations (29-0000) | Calcagno et al., 2020 <sup>124</sup>  | n=700 | Physicians and Surgeons, All Other | Cross-sectional survey | 04/17 - 05/20 | Italy              | 7.86%  | Moderate |
| Healthcare Practitioners and Technical Occupations (29-0000) | Chau et al., 2020 <sup>126</sup>      | n=64  | Physicians and Surgeons, All Other | Cross-sectional survey | 08/23 - 08/30 | Viet Nam           | 0%     | High     |
| Healthcare Practitioners and Technical Occupations (29-0000) | Chen et al., 2020 <sup>135</sup>      | n=17  | Physicians and Surgeons, All Other | Cross-sectional survey | 02/19 - 02/19 | China              | 41.18% | High     |
| Healthcare Practitioners and Technical Occupations (29-0000) | Erber et al., 2020 <sup>31</sup>      | n=860 | Physicians and Surgeons, All Other | Cross-sectional survey | 04/14 - 05/29 | Germany            | 1.63%  | High     |
| Healthcare Practitioners and Technical Occupations (29-0000) | Favara et al., 2020 <sup>136</sup>    | n=15  | Physicians and Surgeons, All Other | Prospective cohort     | 06/01 - 06/07 | The United Kingdom | 13.33% | High     |
| Healthcare Practitioners and Technical Occupations (29-0000) | Favara et al., 2020 <sup>19</sup>     | n=82  | Physicians and Surgeons, All Other | Cross-sectional survey | 07/13 - 07/13 | The United Kingdom | 10.9%  | High     |

|                                                    |                                                              |                                      |       |                                    |                        |               |                          |        |          |
|----------------------------------------------------|--------------------------------------------------------------|--------------------------------------|-------|------------------------------------|------------------------|---------------|--------------------------|--------|----------|
| 1<br>2<br>3<br>4<br>5<br>6<br>7                    | Healthcare Practitioners and Technical Occupations (29-0000) | Fujita et al., 2020 <sup>137</sup>   | n=42  | Physicians and Surgeons, All Other | Cross-sectional survey | 04/10 - 04/20 | Japan                    | 4.7%   | High     |
| 8<br>9<br>10<br>11<br>12<br>13                     | Healthcare Practitioners and Technical Occupations (29-0000) | Galan et al., 2020 <sup>20</sup>     | n=564 | Physicians and Surgeons, All Other | Cross-sectional survey | 04/14 - 04/27 | Spain                    | 39.36% | High     |
| 14<br>15<br>16<br>17<br>18                         | Healthcare Practitioners and Technical Occupations (29-0000) | Godbout et al., 2020 <sup>138</sup>  | n=490 | Physicians and Surgeons, All Other | Cross-sectional survey | 07/27 - 10/02 | United States of America | 1.43%  | High     |
| 19<br>20<br>21<br>22<br>23                         | Healthcare Practitioners and Technical Occupations (29-0000) | Goenka et al., 2020 <sup>25</sup>    | n=255 | Physicians and Surgeons, All Other | Cross-sectional survey | 07/12 - 08/23 | India                    | 3.92%  | Moderate |
| 24<br>25<br>26<br>27<br>28                         | Healthcare Practitioners and Technical Occupations (29-0000) | Goenka et al., 2020 <sup>26</sup>    | n=29  | Physicians and Surgeons, All Other | Cross-sectional survey | 08/01 - 08/31 | India                    | 20.69% | High     |
| 29<br>30<br>31<br>32<br>33                         | Healthcare Practitioners and Technical Occupations (29-0000) | Hanrath et al., 2020 <sup>32</sup>   | n=899 | Physicians and Surgeons, All Other | Cross-sectional survey | 05/29 - 07/06 | The United Kingdom       | 7.01%  | High     |
| 34<br>35<br>36<br>37<br>38                         | Healthcare Practitioners and Technical Occupations (29-0000) | Houlihan et al., 2020 <sup>139</sup> | n=72  | Physicians and Surgeons, All Other | Cross-sectional survey | 03/26 - 04/08 | The United Kingdom       | 22%    | High     |
| 39<br>40<br>41<br>42<br>43<br>44<br>45<br>46<br>47 | Healthcare Practitioners and                                 | Hunter et al., 2020 <sup>21</sup>    | n=279 | Physicians and Surgeons, All Other | Cross-sectional survey | 04/29 - 05/08 | United States of America | 1.08%  | High     |

|   |                                                              |                                     |        |                                    |                        |               |                          |                 |      |
|---|--------------------------------------------------------------|-------------------------------------|--------|------------------------------------|------------------------|---------------|--------------------------|-----------------|------|
| 1 | Technical Occupations (29-0000)                              |                                     |        |                                    |                        |               |                          |                 |      |
| 2 | Healthcare Practitioners and Technical Occupations (29-0000) | Insua et al., 2020 <sup>140</sup>   | n=116  | Physicians and Surgeons, All Other | Cross-sectional survey | 06/08 - 06/09 | Argentina                | 0.9% (0.1-5.5%) | High |
| 3 | Healthcare Practitioners and Technical Occupations (29-0000) | Iversen et al., 2020 <sup>8</sup>   | n=4698 | Physicians and Surgeons, All Other | Cross-sectional survey | 04/15 - 04/22 | Denmark                  | 4.07%           | Low  |
| 4 | Healthcare Practitioners and Technical Occupations (29-0000) | Iversen et al., 2020 <sup>8</sup>   | n=113  | Physicians and Surgeons, All Other | Cross-sectional survey | 04/15 - 04/22 | Denmark                  | 7.08%           | Low  |
| 5 | Healthcare Practitioners and Technical Occupations (29-0000) | Jeremias et al., 2020 <sup>70</sup> | n=79   | Physicians and Surgeons, All Other | Cross-sectional survey | 03/01 - 04/30 | United States of America | 11.4%           | High |
| 6 | Healthcare Practitioners and Technical Occupations (29-0000) | Kassem et al., 2020 <sup>72</sup>   | n=30   | Physicians and Surgeons, All Other | Cross-sectional survey | 06/01 - 06/14 | Egypt                    | 6.66%           | High |
| 7 | Healthcare Practitioners and Technical Occupations (29-0000) | Kassem et al., 2020 <sup>72</sup>   | n=30   | Physicians and Surgeons, All Other | Cross-sectional survey | 06/01 - 06/14 | Egypt                    | 3.33%           | High |
| 8 | Healthcare Practitioners and Technical Occupations (29-0000) | Kassem et al., 2020 <sup>72</sup>   | n=30   | Physicians and Surgeons, All Other | Cross-sectional survey | 06/01 - 06/14 | Egypt                    | 0%              | High |

|                                                              |                                    |        |                                    |                                                                                   |               |                          |                |          |
|--------------------------------------------------------------|------------------------------------|--------|------------------------------------|-----------------------------------------------------------------------------------|---------------|--------------------------|----------------|----------|
| Occupations (29-0000)                                        |                                    |        |                                    |                                                                                   |               |                          |                |          |
| Healthcare Practitioners and Technical Occupations (29-0000) | Kassem et al., 2020 <sup>72</sup>  | n=30   | Physicians and Surgeons, All Other | Cross-sectional survey                                                            | 06/01 - 06/14 | Egypt                    | 3.33%          | High     |
| Healthcare Practitioners and Technical Occupations (29-0000) | Khan et al., 2020 <sup>127</sup>   | n=980  | Physicians and Surgeons, All Other | Cross-sectional survey                                                            | 06/15 - 06/29 | India                    | 2.8% (1.9-4%)  | Moderate |
| Healthcare Practitioners and Technical Occupations (29-0000) | Kohler et al., 2020 <sup>141</sup> | n=268  | Physicians and Surgeons, All Other | Cross-sectional survey                                                            | 03/19 - 04/03 | Switzerland              | 1.49%          | High     |
| Healthcare Practitioners and Technical Occupations (29-0000) | Kumar et al., 2020 <sup>142</sup>  | n=201  | Physicians and Surgeons, All Other | Cross-sectional survey                                                            | 06/01 - 06/30 | India                    | 7% (4.2-11.4%) | High     |
| Healthcare Practitioners and Technical Occupations (29-0000) | Leidner et al., 2020 <sup>22</sup> | n=1081 | Physicians and Surgeons, All Other | Cross sectional study with prospective cohort follow up of a subset of the sample | 04/08 - 05/22 | United States of America | 3.33%          | High     |
| Healthcare Practitioners and Technical Occupations (29-0000) | Lumley et al., 2020 <sup>9</sup>   | n=1859 | Physicians and Surgeons, All Other | Prospective cohort                                                                | 04/23 - 11/30 | The United Kingdom       | 10.11%         | Moderate |
| Healthcare Practitioners and Technical                       | Martin et al., 2020 <sup>23</sup>  | n=1243 | Physicians and Surgeons, All Other | Cross-sectional survey                                                            | 05/29 - 07/13 | The United Kingdom       | 10.3%          | Moderate |

|                                                              |                                       |        |                                    |                        |               |                          |                  |          |
|--------------------------------------------------------------|---------------------------------------|--------|------------------------------------|------------------------|---------------|--------------------------|------------------|----------|
| Occupations (29-0000)                                        |                                       |        |                                    |                        |               |                          |                  |          |
| Healthcare Practitioners and Technical Occupations (29-0000) | Mesnil et al., 2020 <sup>143</sup>    | n=111  | Physicians and Surgeons, All Other | Cross-sectional survey | 06/08 - 06/22 | France                   | 11%              | High     |
| Healthcare Practitioners and Technical Occupations (29-0000) | Missaglia et al., 2020 <sup>144</sup> | n=377  | Physicians and Surgeons, All Other | Cross-sectional survey | 04/01 - 04/30 | Italy                    | 14.9%            | High     |
| Healthcare Practitioners and Technical Occupations (29-0000) | Mohr et al., 2020 <sup>129</sup>      | n=272  | Physicians and Surgeons, All Other | Cross-sectional survey | 05/13 - 07/08 | United States of America | 2.94%            | Moderate |
| Healthcare Practitioners and Technical Occupations (29-0000) | Moscola et al., 2020 <sup>89</sup>    | n=3746 | Physicians and Surgeons, All Other | Cross-sectional survey | 04/20 - 06/23 | United States of America | 8.7%             | High     |
| Healthcare Practitioners and Technical Occupations (29-0000) | Nishida et al., 2020 <sup>90</sup>    | n=149  | Physicians and Surgeons, All Other | Cross-sectional survey | 06/12 - 06/19 | Japan                    | 1.3% (0.37-4.8%) | Moderate |
| Healthcare Practitioners and Technical Occupations (29-0000) | Nishida et al., 2020 <sup>90</sup>    | n=46   | Physicians and Surgeons, All Other | Cross-sectional survey | 06/12 - 06/19 | Japan                    | 0%               | Moderate |
| Healthcare Practitioners and Technical Occupations (29-0000) | Nishida et al., 2020 <sup>90</sup>    | n=40   | Physicians and Surgeons, All Other | Cross-sectional survey | 06/12 - 06/19 | Japan                    | 0%               | Moderate |

|                                                              |                                         |        |                                    |                        |               |                          |                   |          |
|--------------------------------------------------------------|-----------------------------------------|--------|------------------------------------|------------------------|---------------|--------------------------|-------------------|----------|
| Healthcare Practitioners and Technical Occupations (29-0000) | Nishida et al., 2020 <sup>90</sup>      | n=59   | Physicians and Surgeons, All Other | Cross-sectional survey | 06/12 - 06/19 | Japan                    | 1.7% (0.3-9%)     | Moderate |
| Healthcare Practitioners and Technical Occupations (29-0000) | Nishida et al., 2020 <sup>90</sup>      | n=925  | Physicians and Surgeons, All Other | Cross-sectional survey | 06/12 - 06/19 | Japan                    | 0.43% (0.17-1.1%) | Moderate |
| Healthcare Practitioners and Technical Occupations (29-0000) | Noor et al., 2020 <sup>130</sup>        | n=303  | Physicians and Surgeons, All Other | Cross-sectional survey | 07/13 - 07/15 | Pakistan                 | 19.8%             | Moderate |
| Healthcare Practitioners and Technical Occupations (29-0000) | Orth-Holler et al., 2020 <sup>145</sup> | n=377  | Physicians and Surgeons, All Other | Cross-sectional survey | 03/20 - 03/27 | Austria                  | 0.3% (0.01-1.5%)  | High     |
| Healthcare Practitioners and Technical Occupations (29-0000) | Plebani et al., 2020 <sup>146</sup>     | n=2337 | Physicians and Surgeons, All Other | Cross-sectional survey | 02/22 - 05/29 | Italy                    | 3.6% (2.8-4.4%)   | High     |
| Healthcare Practitioners and Technical Occupations (29-0000) | Rosser et al., 2020 <sup>33</sup>       | n=2533 | Physicians and Surgeons, All Other | Cross-sectional survey | 04/20 - 05/20 | United States of America | 1.07%             | High     |
| Healthcare Practitioners and Technical Occupations (29-0000) | Rudberg et al., 2020 <sup>147</sup>     | n=439  | Physicians and Surgeons, All Other | Cross-sectional survey | 04/14 - 05/08 | Sweden                   | 19.1%             | Moderate |
| Healthcare Practitioners and                                 | Schmidt et al., 2020 <sup>148</sup>     | n=34   | Physicians and Surgeons, All Other | Cross-sectional survey | 04/20 - 04/30 | Germany                  | 8.82%             | High     |



|                                                              |                                       |       |                                    |                        |               |                          |       |          |
|--------------------------------------------------------------|---------------------------------------|-------|------------------------------------|------------------------|---------------|--------------------------|-------|----------|
| Technical Occupations (29-0000)                              |                                       |       |                                    |                        |               |                          |       |          |
| Healthcare Practitioners and Technical Occupations (29-0000) | Sotgiu et al., 2020 <sup>149</sup>    | n=115 | Physicians and Surgeons, All Other | Cross-sectional survey | 04/02 - 04/16 | Italy                    | 6.09% | High     |
| Healthcare Practitioners and Technical Occupations (29-0000) | Venugopal et al., 2020 <sup>150</sup> | n=157 | Physicians and Surgeons, All Other | Cross-sectional survey | 03/01 - 05/01 | United States of America | 25%   | Moderate |
| Healthcare Practitioners and Technical Occupations (29-0000) | Yogo et al., 2020 <sup>36</sup>       | n=110 | Physicians and Surgeons, All Other | Cross-sectional survey | 05/20 - 06/08 | United States of America | 1.82% | High     |
| Healthcare Practitioners and Technical Occupations (29-0000) | Brzostek et al., 2020 <sup>151</sup>  | n=998 | Physician Assistants               | Cross-sectional survey | 04/17 - 05/07 | United States of America | 28.3% | Moderate |
| Healthcare Practitioners and Technical Occupations (29-0000) | Hoffmann et al., 2020 <sup>152</sup>  | n=156 | Physician Assistants               | Prospective cohort     | 07/01 - 07/31 | Germany                  | 1.3%  | High     |
| Healthcare Practitioners and Technical Occupations (29-0000) | Mohr et al., 2020 <sup>129</sup>      | n=156 | Physician Assistants               | Cross-sectional survey | 05/13 - 07/08 | United States of America | 0.64% | Moderate |
| Healthcare Practitioners and Technical                       | Morcuende et al., 2020 <sup>88</sup>  | n=6   | Physician Assistants               | Cross-sectional survey | 03/01 - 04/21 | United States of America | 9.43% | High     |

|                                                              |                                      |       |                         |                        |               |                          |                 |          |
|--------------------------------------------------------------|--------------------------------------|-------|-------------------------|------------------------|---------------|--------------------------|-----------------|----------|
| Occupations (29-0000)                                        |                                      |       |                         |                        |               |                          |                 |          |
| Healthcare Practitioners and Technical Occupations (29-0000) | Morcuende et al., 2020 <sup>88</sup> | n=53  | Physician Assistants    | Cross-sectional survey | 03/01 - 04/21 | United States of America | 9.43%           | High     |
| Healthcare Practitioners and Technical Occupations (29-0000) | Patel et al., 2020 <sup>153</sup>    | n=230 | Physician Assistants    | Prospective cohort     | 06/02 - 06/27 | United States of America | 3.48%           | High     |
| Healthcare Practitioners and Technical Occupations (29-0000) | Self et al., 2020 <sup>154</sup>     | n=919 | Physician Assistants    | Cross-sectional survey | 04/03 - 06/19 | United States of America | 5.66%           | Moderate |
| Healthcare Practitioners and Technical Occupations (29-0000) | Shah et al., 2020 <sup>155</sup>     | n=248 | Physician Assistants    | Cross-sectional survey | 05/25 - 07/09 | United States of America | 0%              | High     |
| Healthcare Practitioners and Technical Occupations (29-0000) | Shah et al., 2020 <sup>155</sup>     | n=320 | Physician Assistants    | Cross-sectional survey | 05/25 - 07/09 | United States of America | 0.63%           | High     |
| Healthcare Practitioners and Technical Occupations (29-0000) | Lumley et al., 2020 <sup>9</sup>     | n=386 | Occupational Therapists | Prospective cohort     | 04/23 - 11/30 | The United Kingdom       | 11.4%           | Moderate |
| Healthcare Practitioners and Technical Occupations (29-0000) | Akinbami et al., 2020 <sup>46</sup>  | n=235 | Physical Therapists     | Cross-sectional survey | 05/18 - 06/13 | United States of America | 10.6% (7-15.3%) | Moderate |

|                                                              |                                     |       |                        |                                                                                   |               |                          |                  |          |
|--------------------------------------------------------------|-------------------------------------|-------|------------------------|-----------------------------------------------------------------------------------|---------------|--------------------------|------------------|----------|
| Healthcare Practitioners and Technical Occupations (29-0000) | Brehm et al., 2020 <sup>7</sup>     | n=15  | Physical Therapists    | Cross sectional study with prospective cohort follow up of a subset of the sample | 03/20 - 07/17 | Germany                  | 0%               | Moderate |
| Healthcare Practitioners and Technical Occupations (29-0000) | Cooper et al., 2020 <sup>59</sup>   | n=84  | Physical Therapists    | Cross-sectional survey                                                            | 06/10 - 08/07 | The United Kingdom       | 10.71%           | Moderate |
| Healthcare Practitioners and Technical Occupations (29-0000) | Costa et al., 2020 <sup>128</sup>   | n=159 | Physical Therapists    | Cross-sectional survey                                                            | 05/14 - 05/28 | Brazil                   | 10.7%            | Moderate |
| Healthcare Practitioners and Technical Occupations (29-0000) | Akinbami et al., 2020 <sup>46</sup> | n=409 | Respiratory Therapists | Cross-sectional survey                                                            | 05/18 - 06/13 | United States of America | 8.3% (5.8-11.4%) | Moderate |
| Healthcare Practitioners and Technical Occupations (29-0000) | Brunner et al., 2020 <sup>54</sup>  | n=42  | Respiratory Therapists | Cross-sectional survey                                                            | 05/04 - 05/29 | United States of America | 0%               | High     |
| Healthcare Practitioners and Technical Occupations (29-0000) | Godbout et al., 2020 <sup>138</sup> | n=25  | Respiratory Therapists | Cross-sectional survey                                                            | 07/27 - 10/02 | United States of America | 0%               | High     |
| Healthcare Practitioners and Technical Occupations (29-0000) | Hunter et al., 2020 <sup>21</sup>   | n=94  | Respiratory Therapists | Cross-sectional survey                                                            | 04/29 - 05/08 | United States of America | 0%               | High     |

|                                                              |                                      |        |                        |                        |               |                          |                 |          |
|--------------------------------------------------------------|--------------------------------------|--------|------------------------|------------------------|---------------|--------------------------|-----------------|----------|
| Healthcare Practitioners and Technical Occupations (29-0000) | Rosser et al., 2020 <sup>33</sup>    | n=135  | Respiratory Therapists | Cross-sectional survey | 04/20 - 05/20 | United States of America | 0%              | High     |
| Healthcare Practitioners and Technical Occupations (29-0000) | Self et al., 2020 <sup>154</sup>     | n=235  | Respiratory Therapists | Cross-sectional survey | 04/03 - 06/19 | United States of America | 4.26%           | Moderate |
| Healthcare Practitioners and Technical Occupations (29-0000) | Yogo et al., 2020 <sup>36</sup>      | n=121  | Respiratory Therapists | Cross-sectional survey | 05/20 - 06/08 | United States of America | 0%              | High     |
| Healthcare Practitioners and Technical Occupations (29-0000) | Rosser et al., 2020 <sup>33</sup>    | n=253  | Therapists, All Other  | Cross-sectional survey | 04/20 - 05/20 | United States of America | 1.58%           | High     |
| Healthcare Practitioners and Technical Occupations (29-0000) | Schmidt et al., 2020 <sup>148</sup>  | n=80   | Therapists, All Other  | Cross-sectional survey | 04/20 - 04/30 | Germany                  | 3.75%           | High     |
| Healthcare Practitioners and Technical Occupations (29-0000) | Yogo et al., 2020 <sup>36</sup>      | n=22   | Therapists, All Other  | Cross-sectional survey | 05/20 - 06/08 | United States of America | 4.55%           | High     |
| Healthcare Practitioners and Technical Occupations (29-0000) | Calcagno et al., 2020 <sup>124</sup> | n=13   | Veterinarians          | Cross-sectional survey | 04/17 - 05/20 | Italy                    | 0%              | Moderate |
| Healthcare Practitioners and                                 | Akinbami et al., 2020 <sup>46</sup>  | n=6426 | Registered Nurses      | Cross-sectional survey | 05/18 - 06/13 | United States of America | 7.7% (7.1-8.4%) | Moderate |

|                                                              |                                     |       |                   |                        |               |                    |                   |      |
|--------------------------------------------------------------|-------------------------------------|-------|-------------------|------------------------|---------------|--------------------|-------------------|------|
| Technical Occupations (29-0000)                              |                                     |       |                   |                        |               |                    |                   |      |
| Healthcare Practitioners and Technical Occupations (29-0000) | Alharbi et al., 2020 <sup>125</sup> | n=70  | Registered Nurses | Cross-sectional survey | 04/18 - 06/17 | Saudi Arabia       | 10%               | High |
| Healthcare Practitioners and Technical Occupations (29-0000) | Alharbi et al., 2020 <sup>125</sup> | n=9   | Registered Nurses | Cross-sectional survey | 04/18 - 06/17 | Saudi Arabia       | 33.33%            | High |
| Healthcare Practitioners and Technical Occupations (29-0000) | Alharbi et al., 2020 <sup>125</sup> | n=76  | Registered Nurses | Cross-sectional survey | 04/18 - 06/17 | Saudi Arabia       | 26.32%            | High |
| Healthcare Practitioners and Technical Occupations (29-0000) | Alharbi et al., 2020 <sup>125</sup> | n=21  | Registered Nurses | Cross-sectional survey | 04/18 - 06/17 | Saudi Arabia       | 14.29%            | High |
| Healthcare Practitioners and Technical Occupations (29-0000) | Alharbi et al., 2020 <sup>125</sup> | n=43  | Registered Nurses | Cross-sectional survey | 04/18 - 06/17 | Saudi Arabia       | 27.91%            | High |
| Healthcare Practitioners and Technical Occupations (29-0000) | Amendola et al., 2020 <sup>47</sup> | n=216 | Registered Nurses | Cross-sectional survey | 04/15 - 04/15 | Italy              | 6.02%             | High |
| Healthcare Practitioners and Technical                       | Bampoe et al., 2020 <sup>156</sup>  | n=52  | Registered Nurses | Cross-sectional survey | 05/11 - 06/05 | The United Kingdom | 13.5% (5.6-25.8%) | High |

|                                                              |                                       |        |                   |                                                                                   |               |                    |                   |          |
|--------------------------------------------------------------|---------------------------------------|--------|-------------------|-----------------------------------------------------------------------------------|---------------|--------------------|-------------------|----------|
| Occupations (29-0000)                                        |                                       |        |                   |                                                                                   |               |                    |                   |          |
| Healthcare Practitioners and Technical Occupations (29-0000) | Bampoe et al., 2020 <sup>156</sup>    | n=40   | Registered Nurses | Cross-sectional survey                                                            | 05/11 - 06/05 | The United Kingdom | 12.5% (4.2-26.8%) | High     |
| Healthcare Practitioners and Technical Occupations (29-0000) | Baracco et al., 2020 <sup>24</sup>    | n=1014 | Registered Nurses | Cross-sectional survey                                                            | 04/23 - 05/05 | Italy              | 17.9%             | High     |
| Healthcare Practitioners and Technical Occupations (29-0000) | Barallat et al., 2020 <sup>50</sup>   | n=2243 | Registered Nurses | Cross-sectional survey                                                            | 05/04 - 05/22 | Spain              | 10.64%            | High     |
| Healthcare Practitioners and Technical Occupations (29-0000) | Brehm et al., 2020 <sup>7</sup>       | n=444  | Registered Nurses | Cross sectional study with prospective cohort follow up of a subset of the sample | 03/20 - 07/17 | Germany            | 2.3%              | Moderate |
| Healthcare Practitioners and Technical Occupations (29-0000) | Brousseau et al., 2020 <sup>134</sup> | n=1189 | Registered Nurses | Cross-sectional survey                                                            | 07/06 - 09/24 | Canada             | 11.9%             | High     |
| Healthcare Practitioners and Technical Occupations (29-0000) | Calcagno et al., 2020 <sup>124</sup>  | n=1833 | Registered Nurses | Cross-sectional survey                                                            | 04/17 - 05/20 | Italy              | 8.18%             | Moderate |
| Healthcare Practitioners and Technical                       | Chau et al., 2020 <sup>126</sup>      | n=144  | Registered Nurses | Cross-sectional survey                                                            | 08/23 - 08/30 | Viet Nam           | 0%                | High     |

|                                                              |                                      |        |                   |                        |               |                          |        |          |
|--------------------------------------------------------------|--------------------------------------|--------|-------------------|------------------------|---------------|--------------------------|--------|----------|
| Occupations (29-0000)                                        |                                      |        |                   |                        |               |                          |        |          |
| Healthcare Practitioners and Technical Occupations (29-0000) | Chen et al., 2020 <sup>135</sup>     | n=25   | Registered Nurses | Cross-sectional survey | 02/19 - 02/19 | China                    | 8%     | High     |
| Healthcare Practitioners and Technical Occupations (29-0000) | Cooper et al., 2020 <sup>59</sup>    | n=3471 | Registered Nurses | Cross-sectional survey | 06/10 - 08/07 | The United Kingdom       | 7.52%  | Moderate |
| Healthcare Practitioners and Technical Occupations (29-0000) | Costa et al., 2020 <sup>128</sup>    | n=370  | Registered Nurses | Cross-sectional survey | 05/14 - 05/28 | Brazil                   | 11.4%  | Moderate |
| Healthcare Practitioners and Technical Occupations (29-0000) | Dimcheff et al., 2020 <sup>157</sup> | n=412  | Registered Nurses | Cross-sectional survey | 06/08 - 07/08 | United States of America | 7%     | Moderate |
| Healthcare Practitioners and Technical Occupations (29-0000) | Erber et al., 2020 <sup>31</sup>     | n=958  | Registered Nurses | Cross-sectional survey | 04/14 - 05/29 | Germany                  | 2.5%   | High     |
| Healthcare Practitioners and Technical Occupations (29-0000) | Favara et al., 2020 <sup>136</sup>   | n=45   | Registered Nurses | Prospective cohort     | 06/01 - 06/07 | The United Kingdom       | 28.89% | High     |
| Healthcare Practitioners and Technical Occupations (29-0000) | Favara et al., 2020 <sup>19</sup>    | n=237  | Registered Nurses | Cross-sectional survey | 07/13 - 07/13 | The United Kingdom       | 16.5%  | High     |

|                                                              |                                          |        |                   |                        |               |                          |        |          |
|--------------------------------------------------------------|------------------------------------------|--------|-------------------|------------------------|---------------|--------------------------|--------|----------|
| Healthcare Practitioners and Technical Occupations (29-0000) | Finkenzeller et al., 2020 <sup>158</sup> | n=251  | Registered Nurses | Prospective cohort     | 06/29 - 07/29 | Germany                  | 12%    | Moderate |
| Healthcare Practitioners and Technical Occupations (29-0000) | Finkenzeller et al., 2020 <sup>158</sup> | n=887  | Registered Nurses | Prospective cohort     | 06/29 - 07/29 | Germany                  | 20%    | Moderate |
| Healthcare Practitioners and Technical Occupations (29-0000) | Fujita et al., 2020 <sup>137</sup>       | n=50   | Registered Nurses | Cross-sectional survey | 04/10 - 04/20 | Japan                    | 6%     | High     |
| Healthcare Practitioners and Technical Occupations (29-0000) | Galan et al., 2020 <sup>20</sup>         | n=687  | Registered Nurses | Cross-sectional survey | 04/14 - 04/27 | Spain                    | 30.71% | High     |
| Healthcare Practitioners and Technical Occupations (29-0000) | Godbout et al., 2020 <sup>138</sup>      | n=937  | Registered Nurses | Cross-sectional survey | 07/27 - 10/02 | United States of America | 1.39%  | High     |
| Healthcare Practitioners and Technical Occupations (29-0000) | Goenka et al., 2020 <sup>25</sup>        | n=224  | Registered Nurses | Cross-sectional survey | 07/12 - 08/23 | India                    | 9.38%  | Moderate |
| Healthcare Practitioners and Technical Occupations (29-0000) | Goenka et al., 2020 <sup>26</sup>        | n=43   | Registered Nurses | Cross-sectional survey | 08/01 - 08/31 | India                    | 34.88% | High     |
| Healthcare Practitioners and                                 | Grant et al., 2020 <sup>159</sup>        | n=1345 | Registered Nurses | Cross-sectional survey | 05/15 - 06/05 | The United Kingdom       | 34.7%  | High     |



|                                                              |                                      |        |                   |                        |               |                          |                    |          |
|--------------------------------------------------------------|--------------------------------------|--------|-------------------|------------------------|---------------|--------------------------|--------------------|----------|
| Technical Occupations (29-0000)                              |                                      |        |                   |                        |               |                          |                    |          |
| Healthcare Practitioners and Technical Occupations (29-0000) | Grant et al., 2020 <sup>159</sup>    | n=108  | Registered Nurses | Cross-sectional survey | 05/15 - 06/05 | The United Kingdom       | 25%                | High     |
| Healthcare Practitioners and Technical Occupations (29-0000) | Hanrath et al., 2020 <sup>32</sup>   | n=749  | Registered Nurses | Cross-sectional survey | 05/29 - 07/06 | The United Kingdom       | 8.99%              | High     |
| Healthcare Practitioners and Technical Occupations (29-0000) | Haq et al., 2020 <sup>67</sup>       | n=209  | Registered Nurses | Cross-sectional survey | 06/15 - 06/29 | Pakistan                 | 38.8% (32.1-45.7%) | Moderate |
| Healthcare Practitioners and Technical Occupations (29-0000) | Houlihan et al., 2020 <sup>139</sup> | n=106  | Registered Nurses | Cross-sectional survey | 03/26 - 04/08 | The United Kingdom       | 24%                | High     |
| Healthcare Practitioners and Technical Occupations (29-0000) | Houlihan et al., 2020 <sup>139</sup> | n=22   | Registered Nurses | Cross-sectional survey | 03/26 - 04/08 | The United Kingdom       | 23%                | High     |
| Healthcare Practitioners and Technical Occupations (29-0000) | Hunter et al., 2020 <sup>21</sup>    | n=317  | Registered Nurses | Cross-sectional survey | 04/29 - 05/08 | United States of America | 2.2%               | High     |
| Healthcare Practitioners and Technical                       | Iversen et al., 2020 <sup>8</sup>    | n=9963 | Registered Nurses | Cross-sectional survey | 04/15 - 04/22 | Denmark                  | 4.03%              | Low      |

|                                                              |                                     |        |                   |                        |               |                          |        |      |
|--------------------------------------------------------------|-------------------------------------|--------|-------------------|------------------------|---------------|--------------------------|--------|------|
| Occupations (29-0000)                                        |                                     |        |                   |                        |               |                          |        |      |
| Healthcare Practitioners and Technical Occupations (29-0000) | Iversen et al., 2020 <sup>8</sup>   | n=1786 | Registered Nurses | Cross-sectional survey | 04/15 - 04/22 | Denmark                  | 4.65%  | Low  |
| Healthcare Practitioners and Technical Occupations (29-0000) | Jeremias et al., 2020 <sup>70</sup> | n=1043 | Registered Nurses | Cross-sectional survey | 03/01 - 04/30 | United States of America | 9.5%   | High |
| Healthcare Practitioners and Technical Occupations (29-0000) | Jones et al., 2020 <sup>29</sup>    | n=1962 | Registered Nurses | Cross-sectional survey | 01/15 - 06/15 | The United Kingdom       | 10.5%  | High |
| Healthcare Practitioners and Technical Occupations (29-0000) | Kassem et al., 2020 <sup>72</sup>   | n=28   | Registered Nurses | Cross-sectional survey | 06/01 - 06/14 | Egypt                    | 10.71% | High |
| Healthcare Practitioners and Technical Occupations (29-0000) | Kassem et al., 2020 <sup>72</sup>   | n=28   | Registered Nurses | Cross-sectional survey | 06/01 - 06/14 | Egypt                    | 7.14%  | High |
| Healthcare Practitioners and Technical Occupations (29-0000) | Kassem et al., 2020 <sup>72</sup>   | n=28   | Registered Nurses | Cross-sectional survey | 06/01 - 06/14 | Egypt                    | 3.57%  | High |
| Healthcare Practitioners and Technical Occupations (29-0000) | Kassem et al., 2020 <sup>72</sup>   | n=28   | Registered Nurses | Cross-sectional survey | 06/01 - 06/14 | Egypt                    | 0%     | High |

|                                                              |                                     |        |                   |                                                                                   |               |                          |                  |          |
|--------------------------------------------------------------|-------------------------------------|--------|-------------------|-----------------------------------------------------------------------------------|---------------|--------------------------|------------------|----------|
| Healthcare Practitioners and Technical Occupations (29-0000) | Khan et al., 2020 <sup>127</sup>    | n=321  | Registered Nurses | Cross-sectional survey                                                            | 06/15 - 06/29 | India                    | 2.8% (1.5-5.3%)  | Moderate |
| Healthcare Practitioners and Technical Occupations (29-0000) | Kohler et al., 2020 <sup>141</sup>  | n=398  | Registered Nurses | Cross-sectional survey                                                            | 03/19 - 04/03 | Switzerland              | 0.75%            | High     |
| Healthcare Practitioners and Technical Occupations (29-0000) | Kumar et al., 2020 <sup>142</sup>   | n=308  | Registered Nurses | Cross-sectional survey                                                            | 06/01 - 06/30 | India                    | 6.8% (4.5-10.2%) | High     |
| Healthcare Practitioners and Technical Occupations (29-0000) | Leidner et al., 2020 <sup>22</sup>  | n=110  | Registered Nurses | Cross sectional study with prospective cohort follow up of a subset of the sample | 04/08 - 05/22 | United States of America | 0%               | High     |
| Healthcare Practitioners and Technical Occupations (29-0000) | Leidner et al., 2020 <sup>22</sup>  | n=3504 | Registered Nurses | Cross sectional study with prospective cohort follow up of a subset of the sample | 04/08 - 05/22 | United States of America | 2.34%            | High     |
| Healthcare Practitioners and Technical Occupations (29-0000) | Lumley et al., 2020 <sup>9</sup>    | n=4528 | Registered Nurses | Prospective cohort                                                                | 04/23 - 11/30 | The United Kingdom       | 13.21%           | Moderate |
| Healthcare Practitioners and Technical Occupations (29-0000) | Mansour et al., 2020 <sup>160</sup> | n=285  | Registered Nurses | Cross-sectional survey                                                            | 03/24 - 04/04 | United States of America | 32.63%           | High     |

|                                                    |                                                              |                                      |         |                   |                        |               |                          |       |          |
|----------------------------------------------------|--------------------------------------------------------------|--------------------------------------|---------|-------------------|------------------------|---------------|--------------------------|-------|----------|
| 1<br>2<br>3<br>4<br>5<br>6<br>7                    | Healthcare Practitioners and Technical Occupations (29-0000) | Martin et al., 2020 <sup>161</sup>   | n=580   | Registered Nurses | Cross-sectional survey | 04/01 - 04/15 | Spain                    | 5.52% | High     |
| 8<br>9<br>10<br>11<br>12                           | Healthcare Practitioners and Technical Occupations (29-0000) | Martin et al., 2020 <sup>161</sup>   | n=74    | Registered Nurses | Cross-sectional survey | 04/01 - 04/15 | Spain                    | 9.46% | High     |
| 13<br>14<br>15<br>16<br>17<br>18                   | Healthcare Practitioners and Technical Occupations (29-0000) | Martin et al., 2020 <sup>161</sup>   | n=676   | Registered Nurses | Cross-sectional survey | 04/01 - 04/15 | Spain                    | 5.92% | High     |
| 19<br>20<br>21<br>22<br>23                         | Healthcare Practitioners and Technical Occupations (29-0000) | Martin et al., 2020 <sup>161</sup>   | n=337   | Registered Nurses | Cross-sectional survey | 04/01 - 04/15 | Spain                    | 5.93% | High     |
| 24<br>25<br>26<br>27<br>28                         | Healthcare Practitioners and Technical Occupations (29-0000) | Martin et al., 2020 <sup>161</sup>   | n=339   | Registered Nurses | Cross-sectional survey | 04/01 - 04/15 | Spain                    | 5.9%  | High     |
| 29<br>30<br>31<br>32<br>33                         | Healthcare Practitioners and Technical Occupations (29-0000) | Meissner et al., 2020 <sup>162</sup> | n=439   | Registered Nurses | Cross-sectional survey | 04/14 - 05/06 | United States of America | 1.37% | High     |
| 34<br>35<br>36<br>37<br>38                         | Healthcare Practitioners and Technical Occupations (29-0000) | Mohr et al., 2020 <sup>129</sup>     | n=410   | Registered Nurses | Cross-sectional survey | 05/13 - 07/08 | United States of America | 1.46% | Moderate |
| 39<br>40<br>41<br>42<br>43<br>44<br>45<br>46<br>47 | Healthcare Practitioners and                                 | Moscola et al., 2020 <sup>89</sup>   | n=11468 | Registered Nurses | Cross-sectional survey | 04/20 - 06/23 | United States of America | 13.1% | High     |

|                                                              |                                      |        |                   |                                                                                   |               |                            |                  |          |
|--------------------------------------------------------------|--------------------------------------|--------|-------------------|-----------------------------------------------------------------------------------|---------------|----------------------------|------------------|----------|
| Technical Occupations (29-0000)                              |                                      |        |                   |                                                                                   |               |                            |                  |          |
| Healthcare Practitioners and Technical Occupations (29-0000) | Mostafa et al., 2020 <sup>163</sup>  | n=4040 | Registered Nurses | Cross-sectional survey                                                            | 04/22 - 05/14 | Egypt                      | 1.31%            | High     |
| Healthcare Practitioners and Technical Occupations (29-0000) | Nishida et al., 2020 <sup>90</sup>   | n=489  | Registered Nurses | Cross-sectional survey                                                            | 06/12 - 06/19 | Japan                      | 0.2% (0.04-1.1%) | Moderate |
| Healthcare Practitioners and Technical Occupations (29-0000) | Noor et al., 2020 <sup>130</sup>     | n=460  | Registered Nurses | Cross-sectional survey                                                            | 07/13 - 07/15 | Pakistan                   | 39.78%           | Moderate |
| Healthcare Practitioners and Technical Occupations (29-0000) | Paradiso et al., 2020 <sup>164</sup> | n=606  | Registered Nurses | Cross sectional study with prospective cohort follow up of a subset of the sample | 03/26 - 04/17 | Italy                      | 0.33%            | High     |
| Healthcare Practitioners and Technical Occupations (29-0000) | Plebani et al., 2020 <sup>146</sup>  | n=3230 | Registered Nurses | Cross-sectional survey                                                            | 02/22 - 05/29 | Italy                      | 4.7% (4-5.5%)    | High     |
| Healthcare Practitioners and Technical Occupations (29-0000) | Poustchi et al., 2020 <sup>28</sup>  | n=1245 | Registered Nurses | Cross-sectional survey                                                            | 04/17 - 06/02 | Iran (Islamic Republic of) | 15.9% (13.9-18%) | Moderate |
| Healthcare Practitioners and Technical                       | Rudberg et al., 2020 <sup>147</sup>  | n=636  | Registered Nurses | Cross-sectional survey                                                            | 04/14 - 05/08 | Sweden                     | 21.9%            | Moderate |

|                                                              |                                      |        |                   |                        |               |                          |                  |          |
|--------------------------------------------------------------|--------------------------------------|--------|-------------------|------------------------|---------------|--------------------------|------------------|----------|
| Occupations (29-0000)                                        |                                      |        |                   |                        |               |                          |                  |          |
| Healthcare Practitioners and Technical Occupations (29-0000) | Schmidt et al., 2020 <sup>148</sup>  | n=154  | Registered Nurses | Cross-sectional survey | 04/20 - 04/30 | Germany                  | 0%               | High     |
| Healthcare Practitioners and Technical Occupations (29-0000) | Self et al., 2020 <sup>154</sup>     | n=1445 | Registered Nurses | Cross-sectional survey | 04/03 - 06/19 | United States of America | 5.05%            | Moderate |
| Healthcare Practitioners and Technical Occupations (29-0000) | Siddiqui et al., 2020 <sup>2</sup>   | n=59   | Registered Nurses | Prospective cohort     | 04/15 - 08/15 | India                    | 10.2%            | High     |
| Healthcare Practitioners and Technical Occupations (29-0000) | Siddiqui et al., 2020 <sup>2</sup>   | n=70   | Registered Nurses | Prospective cohort     | 04/15 - 08/15 | India                    | 10%              | High     |
| Healthcare Practitioners and Technical Occupations (29-0000) | Sotgiu et al., 2020 <sup>149</sup>   | n=64   | Registered Nurses | Cross-sectional survey | 04/02 - 04/16 | Italy                    | 7.8% (1.2-14.4%) | High     |
| Healthcare Practitioners and Technical Occupations (29-0000) | Sydney et al., 2020 <sup>165</sup>   | n=81   | Registered Nurses | Cross-sectional survey | 04/28 - 05/04 | United States of America | 18.52%           | High     |
| Healthcare Practitioners and Technical Occupations (29-0000) | Urbietta et al., 2020 <sup>132</sup> | n=83   | Registered Nurses | Cross-sectional survey | 04/14 - 04/16 | Spain                    | 4.8%             | High     |

|                                                              |                                       |        |                                      |                        |               |                          |                 |          |
|--------------------------------------------------------------|---------------------------------------|--------|--------------------------------------|------------------------|---------------|--------------------------|-----------------|----------|
| Healthcare Practitioners and Technical Occupations (29-0000) | Urbietta et al., 2020 <sup>132</sup>  | n=23   | Registered Nurses                    | Cross-sectional survey | 04/14 - 04/16 | Spain                    | 8.7%            | High     |
| Healthcare Practitioners and Technical Occupations (29-0000) | Venugopal et al., 2020 <sup>150</sup> | n=142  | Registered Nurses                    | Cross-sectional survey | 03/01 - 05/01 | United States of America | 28%             | Moderate |
| Healthcare Practitioners and Technical Occupations (29-0000) | Yogo et al., 2020 <sup>36</sup>       | n=1129 | Registered Nurses                    | Cross-sectional survey | 05/20 - 06/08 | United States of America | 2.48%           | High     |
| Healthcare Practitioners and Technical Occupations (29-0000) | Yogo et al., 2020 <sup>36</sup>       | n=12   | Registered Nurses                    | Cross-sectional survey | 05/20 - 06/08 | United States of America | 0%              | High     |
| Healthcare Practitioners and Technical Occupations (29-0000) | Zhou et al., 2020 <sup>166</sup>      | n=2406 | Registered Nurses                    | Cross-sectional survey | 03/16 - 03/25 | China                    | 1.37%           | Moderate |
| Healthcare Practitioners and Technical Occupations (29-0000) | Godbout et al., 2020 <sup>138</sup>   | n=141  | Nurse Practitioners                  | Cross-sectional survey | 07/27 - 10/02 | United States of America | 1.42%           | High     |
| Healthcare Practitioners and Technical Occupations (29-0000) | Dimcheff et al., 2020 <sup>157</sup>  | n=214  | Nurse Practitioners                  | Cross-sectional survey | 06/08 - 07/08 | United States of America | 3.7%            | Moderate |
| Healthcare Practitioners and                                 | Akinbami et al., 2020 <sup>46</sup>   | n=719  | Health Technologists and Technicians | Cross-sectional survey | 05/18 - 06/13 | United States of America | 4.2% (2.8-5.9%) | Moderate |

|                                                              |                                     |       |                                                   |                        |               |                          |                 |          |
|--------------------------------------------------------------|-------------------------------------|-------|---------------------------------------------------|------------------------|---------------|--------------------------|-----------------|----------|
| Technical Occupations (29-0000)                              |                                     |       |                                                   |                        |               |                          |                 |          |
| Healthcare Practitioners and Technical Occupations (29-0000) | Blairon et al., 2020 <sup>52</sup>  | n=61  | Health Technologists and Technicians              | Cross-sectional survey | 05/25 - 06/19 | Belgium                  | 6.6%            | High     |
| Healthcare Practitioners and Technical Occupations (29-0000) | Yogo et al., 2020 <sup>36</sup>     | n=65  | Health Technologists and Technicians              | Cross-sectional survey | 05/20 - 06/08 | United States of America | 4.62%           | High     |
| Healthcare Practitioners and Technical Occupations (29-0000) | Silva et al., 2020 <sup>34</sup>    | n=224 | Clinical Laboratory Technologists and Technicians | Cross-sectional survey | 06/05 - 07/31 | Brazil                   | 7.59%           | High     |
| Healthcare Practitioners and Technical Occupations (29-0000) | Costa et al., 2020 <sup>128</sup>   | n=66  | Medical and Clinical Laboratory Technologists     | Cross-sectional survey | 05/14 - 05/28 | Brazil                   | 3%              | Moderate |
| Healthcare Practitioners and Technical Occupations (29-0000) | Akinbami et al., 2020 <sup>46</sup> | n=293 | Medical and Clinical Laboratory Technicians       | Cross-sectional survey | 05/18 - 06/13 | United States of America | 3.4% (1.7-6.2%) | Moderate |
| Healthcare Practitioners and Technical Occupations (29-0000) | Akinbami et al., 2020 <sup>46</sup> | n=365 | Medical and Clinical Laboratory Technicians       | Cross-sectional survey | 05/18 - 06/13 | United States of America | 5.5% (3.4-8.3%) | Moderate |
| Healthcare Practitioners and Technical                       | Alharbi et al., 2020 <sup>125</sup> | n=80  | Medical and Clinical Laboratory Technicians       | Cross-sectional survey | 04/18 - 06/17 | Saudi Arabia             | 20%             | High     |



|                                                              |                                      |       |                                             |                                                                                   |               |          |        |          |
|--------------------------------------------------------------|--------------------------------------|-------|---------------------------------------------|-----------------------------------------------------------------------------------|---------------|----------|--------|----------|
| Occupations (29-0000)                                        |                                      |       |                                             |                                                                                   |               |          |        |          |
| Healthcare Practitioners and Technical Occupations (29-0000) | Baracco et al., 2020 <sup>24</sup>   | n=256 | Medical and Clinical Laboratory Technicians | Cross-sectional survey                                                            | 04/23 - 05/05 | Italy    | 12.1%  | High     |
| Healthcare Practitioners and Technical Occupations (29-0000) | Brehm et al., 2020 <sup>7</sup>      | n=105 | Medical and Clinical Laboratory Technicians | Cross sectional study with prospective cohort follow up of a subset of the sample | 03/20 - 07/17 | Germany  | 0%     | Moderate |
| Healthcare Practitioners and Technical Occupations (29-0000) | Calcagno et al., 2020 <sup>124</sup> | n=216 | Medical and Clinical Laboratory Technicians | Cross-sectional survey                                                            | 04/17 - 05/20 | Italy    | 6.94%  | Moderate |
| Healthcare Practitioners and Technical Occupations (29-0000) | Calcagno et al., 2020 <sup>124</sup> | n=157 | Medical and Clinical Laboratory Technicians | Cross-sectional survey                                                            | 04/17 - 05/20 | Italy    | 11.46% | Moderate |
| Healthcare Practitioners and Technical Occupations (29-0000) | Chau et al., 2020 <sup>126</sup>     | n=33  | Medical and Clinical Laboratory Technicians | Cross-sectional survey                                                            | 08/23 - 08/30 | Viet Nam | 0%     | High     |
| Healthcare Practitioners and Technical Occupations (29-0000) | Galan et al., 2020 <sup>20</sup>     | n=192 | Medical and Clinical Laboratory Technicians | Cross-sectional survey                                                            | 04/14 - 04/27 | Spain    | 21.35% | High     |
| Healthcare Practitioners and Technical                       | Goenka et al., 2020 <sup>25</sup>    | n=72  | Medical and Clinical Laboratory Technicians | Cross-sectional survey                                                            | 07/12 - 08/23 | India    | 15.28% | Moderate |

|                                                              |                                    |        |                                             |                        |               |                          |                  |          |
|--------------------------------------------------------------|------------------------------------|--------|---------------------------------------------|------------------------|---------------|--------------------------|------------------|----------|
| Occupations (29-0000)                                        |                                    |        |                                             |                        |               |                          |                  |          |
| Healthcare Practitioners and Technical Occupations (29-0000) | Haq et al., 2020 <sup>67</sup>     | n=32   | Medical and Clinical Laboratory Technicians | Cross-sectional survey | 06/15 - 06/29 | Pakistan                 | 50% (31.8-68.1%) | Moderate |
| Healthcare Practitioners and Technical Occupations (29-0000) | Iversen et al., 2020 <sup>8</sup>  | n=1292 | Medical and Clinical Laboratory Technicians | Cross-sectional survey | 04/15 - 04/22 | Denmark                  | 1.93%            | Low      |
| Healthcare Practitioners and Technical Occupations (29-0000) | Khan et al., 2020 <sup>127</sup>   | n=397  | Medical and Clinical Laboratory Technicians | Cross-sectional survey | 06/15 - 06/29 | India                    | 2.5% (1.4-4.6%)  | Moderate |
| Healthcare Practitioners and Technical Occupations (29-0000) | Lumley et al., 2020 <sup>9</sup>   | n=452  | Medical and Clinical Laboratory Technicians | Prospective cohort     | 04/23 - 11/30 | The United Kingdom       | 8.63%            | Moderate |
| Healthcare Practitioners and Technical Occupations (29-0000) | Nishida et al., 2020 <sup>90</sup> | n=140  | Medical and Clinical Laboratory Technicians | Cross-sectional survey | 06/12 - 06/19 | Japan                    | 0%               | Moderate |
| Healthcare Practitioners and Technical Occupations (29-0000) | Rosser et al., 2020 <sup>33</sup>  | n=225  | Medical and Clinical Laboratory Technicians | Cross-sectional survey | 04/20 - 05/20 | United States of America | 0.44%            | High     |
| Healthcare Practitioners and Technical Occupations (29-0000) | Iversen et al., 2020 <sup>8</sup>  | n=342  | Radiologic Technologists                    | Cross-sectional survey | 04/15 - 04/22 | Denmark                  | 3.51%            | Low      |

|                                                              |                                     |        |                                              |                        |               |                          |                  |          |
|--------------------------------------------------------------|-------------------------------------|--------|----------------------------------------------|------------------------|---------------|--------------------------|------------------|----------|
| Healthcare Practitioners and Technical Occupations (29-0000) | Martin et al., 2020 <sup>23</sup>   | n=241  | Radiologic Technologists                     | Cross-sectional survey | 05/29 - 07/13 | The United Kingdom       | 9.96%            | Moderate |
| Healthcare Practitioners and Technical Occupations (29-0000) | Akinbami et al., 2020 <sup>46</sup> | n=1158 | Emergency Medical Technicians and Paramedics | Cross-sectional survey | 05/18 - 06/13 | United States of America | 5.2% (4-6.6%)    | Moderate |
| Healthcare Practitioners and Technical Occupations (29-0000) | Buntinx et al., 2020 <sup>167</sup> | n=10   | Emergency Medical Technicians and Paramedics | Cross-sectional survey | 04/14 - 04/16 | Belgium                  | 10%              | High     |
| Healthcare Practitioners and Technical Occupations (29-0000) | Haq et al., 2020 <sup>67</sup>      | n=157  | Emergency Medical Technicians and Paramedics | Cross-sectional survey | 06/15 - 06/29 | Pakistan                 | 42% (34.2-50.1%) | Moderate |
| Healthcare Practitioners and Technical Occupations (29-0000) | Iversen et al., 2020 <sup>8</sup>   | n=323  | Emergency Medical Technicians and Paramedics | Cross-sectional survey | 04/15 - 04/22 | Denmark                  | 4.95%            | Low      |
| Healthcare Practitioners and Technical Occupations (29-0000) | Mesnil et al., 2020 <sup>143</sup>  | n=212  | Emergency Medical Technicians and Paramedics | Cross-sectional survey | 06/08 - 06/22 | France                   | 11%              | High     |
| Healthcare Practitioners and Technical Occupations (29-0000) | Reuben et al., 2020 <sup>168</sup>  | n=10   | Emergency Medical Technicians and Paramedics | Cross-sectional survey | 05/28 - 07/15 | United States of America | 0%               | High     |

|                                                              |                                       |       |                                                 |                        |               |                            |        |          |
|--------------------------------------------------------------|---------------------------------------|-------|-------------------------------------------------|------------------------|---------------|----------------------------|--------|----------|
| Healthcare Practitioners and Technical Occupations (29-0000) | Saberian et al., 2020 <sup>169</sup>  | n=243 | Emergency Medical Technicians and Paramedics    | Cross-sectional survey | 03/20 - 05/20 | Iran (Islamic Republic of) | 41.56% | High     |
| Healthcare Practitioners and Technical Occupations (29-0000) | Self et al., 2020 <sup>154</sup>      | n=56  | Emergency Medical Technicians and Paramedics    | Cross-sectional survey | 04/03 - 06/19 | United States of America   | 5.36%  | Moderate |
| Healthcare Practitioners and Technical Occupations (29-0000) | Tarabichi et al., 2020 <sup>170</sup> | n=111 | Emergency Medical Technicians and Paramedics    | Cross-sectional survey | 04/20 - 05/19 | United States of America   | 5.41%  | High     |
| Healthcare Practitioners and Technical Occupations (29-0000) | Baracco et al., 2020 <sup>24</sup>    | n=188 | Health Technologists and Technicians, All Other | Cross-sectional survey | 04/23 - 05/05 | Italy                      | 13.8%  | High     |
| Healthcare Practitioners and Technical Occupations (29-0000) | Chau et al., 2020 <sup>126</sup>      | n=22  | Health Technologists and Technicians, All Other | Cross-sectional survey | 08/23 - 08/30 | Viet Nam                   | 0%     | High     |
| Healthcare Practitioners and Technical Occupations (29-0000) | Goenka et al., 2020 <sup>25</sup>     | n=99  | Health Technologists and Technicians, All Other | Cross-sectional survey | 07/12 - 08/23 | India                      | 12.12% | Moderate |
| Healthcare Practitioners and Technical Occupations (29-0000) | Goenka et al., 2020 <sup>26</sup>     | n=16  | Health Technologists and Technicians, All Other | Cross-sectional survey | 08/01 - 08/31 | India                      | 68.75% | High     |
| Healthcare Support                                           | Jeremias et al., 2020 <sup>70</sup>   | n=155 | Healthcare Support Occupations                  | Cross-sectional survey | 03/01 - 04/30 | United States of America   | 5.8%   | High     |

|                                          |                                          |       |                                             |                        |               |                          |                      |          |
|------------------------------------------|------------------------------------------|-------|---------------------------------------------|------------------------|---------------|--------------------------|----------------------|----------|
| Occupations (31-0000)                    |                                          |       |                                             |                        |               |                          |                      |          |
| Healthcare Support Occupations (31-0000) | Ward et al., 2020 <sup>113</sup>         | n=979 | Nursing, Psychiatric, and Home Health Aides | Cross-sectional survey | 09/15 - 09/28 | The United Kingdom       | 11.09% (8.96-13.59%) | Moderate |
| Healthcare Support Occupations (31-0000) | Ward et al., 2020 <sup>113</sup>         | n=257 | Nursing, Psychiatric, and Home Health Aides | Cross-sectional survey | 09/15 - 09/28 | The United Kingdom       | 8.95%                | Moderate |
| Healthcare Support Occupations (31-0000) | Vijh et al., 2020 <sup>171</sup>         | n=169 | Nursing, Psychiatric, and Home Health Aides | Cross-sectional survey | 05/04 - 05/14 | Canada                   | 26.63%               | High     |
| Healthcare Support Occupations (31-0000) | Akinbami et al., 2020 <sup>46</sup>      | n=641 | Nursing Assistants                          | Cross-sectional survey | 05/18 - 06/13 | United States of America | 12.8% (10.3-15.6%)   | Moderate |
| Healthcare Support Occupations (31-0000) | Bampoe et al., 2020 <sup>156</sup>       | n=108 | Nursing Assistants                          | Cross-sectional survey | 05/11 - 06/05 | The United Kingdom       | 15.7% (9.5-24%)      | High     |
| Healthcare Support Occupations (31-0000) | Baracco et al., 2020 <sup>24</sup>       | n=257 | Nursing Assistants                          | Cross-sectional survey | 04/23 - 05/05 | Italy                    | 22.2%                | High     |
| Healthcare Support Occupations (31-0000) | Barallat et al., 2020 <sup>50</sup>      | n=832 | Nursing Assistants                          | Cross-sectional survey | 05/04 - 05/22 | Spain                    | 13.94%               | High     |
| Healthcare Support Occupations (31-0000) | Bhattacharya et al., 2020 <sup>172</sup> | n=121 | Nursing Assistants                          | Cross-sectional survey | 06/01 - 06/15 | United States of America | 1.65%                | High     |
| Healthcare Support                       | Brousseau et al., 2020 <sup>134</sup>    | n=132 | Nursing Assistants                          | Cross-sectional survey | 07/06 - 09/24 | Canada                   | 16.7%                | High     |

|                                          |                                      |        |                    |                        |               |                          |        |          |
|------------------------------------------|--------------------------------------|--------|--------------------|------------------------|---------------|--------------------------|--------|----------|
| Occupations (31-0000)                    |                                      |        |                    |                        |               |                          |        |          |
| Healthcare Support Occupations (31-0000) | Brunner et al., 2020 <sup>54</sup>   | n=95   | Nursing Assistants | Cross-sectional survey | 05/04 - 05/29 | United States of America | 1.05%  | High     |
| Healthcare Support Occupations (31-0000) | Brzostek et al., 2020 <sup>151</sup> | n=570  | Nursing Assistants | Cross-sectional survey | 04/17 - 05/07 | United States of America | 39.5%  | Moderate |
| Healthcare Support Occupations (31-0000) | Brzostek et al., 2020 <sup>151</sup> | n=263  | Nursing Assistants | Cross-sectional survey | 04/17 - 05/07 | United States of America | 45.6%  | Moderate |
| Healthcare Support Occupations (31-0000) | Calcagno et al., 2020 <sup>124</sup> | n=476  | Nursing Assistants | Cross-sectional survey | 04/17 - 05/20 | Italy                    | 9.24%  | Moderate |
| Healthcare Support Occupations (31-0000) | Costa et al., 2020 <sup>128</sup>    | n=553  | Nursing Assistants | Cross-sectional survey | 05/14 - 05/28 | Brazil                   | 10.5%  | Moderate |
| Healthcare Support Occupations (31-0000) | Galan et al., 2020 <sup>20</sup>     | n=472  | Nursing Assistants | Cross-sectional survey | 04/14 - 04/27 | Spain                    | 33.26% | High     |
| Healthcare Support Occupations (31-0000) | Garcia et al., 2020 <sup>173</sup>   | n=2424 | Nursing Assistants | Cross-sectional survey | 05/01 - 05/30 | Spain                    | 22.4%  | High     |
| Healthcare Support Occupations (31-0000) | Garcia et al., 2020 <sup>174</sup>   | n=2424 | Nursing Assistants | Cross-sectional survey | 05/01 - 05/30 | Spain                    | 22.4%  | High     |
| Healthcare Support                       | Hanrath et al., 2020 <sup>32</sup>   | n=1434 | Nursing Assistants | Cross-sectional survey | 05/29 - 07/06 | The United Kingdom       | 11.44% | High     |

|                                          |                                       |        |                    |                        |               |                          |               |          |
|------------------------------------------|---------------------------------------|--------|--------------------|------------------------|---------------|--------------------------|---------------|----------|
| Occupations (31-0000)                    |                                       |        |                    |                        |               |                          |               |          |
| Healthcare Support Occupations (31-0000) | Iversen et al., 2020 <sup>8</sup>     | n=501  | Nursing Assistants | Cross-sectional survey | 04/15 - 04/22 | Denmark                  | 1.2%          | Low      |
| Healthcare Support Occupations (31-0000) | Khan et al., 2020 <sup>127</sup>      | n=624  | Nursing Assistants | Cross-sectional survey | 06/15 - 06/29 | India                    | 2.4% (1.5-4%) | Moderate |
| Healthcare Support Occupations (31-0000) | Mughal et al., 2020 <sup>175</sup>    | n=121  | Nursing Assistants | Cross-sectional survey | 05/14 - 05/19 | United States of America | 0.83%         | High     |
| Healthcare Support Occupations (31-0000) | Rao et al., 2020 <sup>176</sup>       | n=1000 | Nursing Assistants | Cross-sectional survey | 05/23 - 06/06 | India                    | 1%            | Unclear  |
| Healthcare Support Occupations (31-0000) | Rudberg et al., 2020 <sup>147</sup>   | n=428  | Nursing Assistants | Cross-sectional survey | 04/14 - 05/08 | Sweden                   | 25.5%         | Moderate |
| Healthcare Support Occupations (31-0000) | Siddiqui et al., 2020 <sup>2</sup>    | n=28   | Nursing Assistants | Prospective cohort     | 04/15 - 08/15 | India                    | 10.7%         | High     |
| Healthcare Support Occupations (31-0000) | Yogo et al., 2020 <sup>36</sup>       | n=154  | Nursing Assistants | Cross-sectional survey | 05/20 - 06/08 | United States of America | 3.24%         | High     |
| Healthcare Support Occupations (31-0000) | Brousseau et al., 2020 <sup>134</sup> | n=201  | Orderlies          | Cross-sectional survey | 07/06 - 09/24 | Canada                   | 17.9%         | High     |
| Healthcare Support                       | Kassem et al., 2020 <sup>72</sup>     | n=9    | Orderlies          | Cross-sectional survey | 06/01 - 06/14 | Egypt                    | 0%            | High     |

|                                          |                                    |        |                                       |                        |               |                          |        |          |
|------------------------------------------|------------------------------------|--------|---------------------------------------|------------------------|---------------|--------------------------|--------|----------|
| Occupations (31-0000)                    |                                    |        |                                       |                        |               |                          |        |          |
| Healthcare Support Occupations (31-0000) | Kassem et al., 2020 <sup>72</sup>  | n=9    | Orderlies                             | Cross-sectional survey | 06/01 - 06/14 | Egypt                    | 33.33% | High     |
| Healthcare Support Occupations (31-0000) | Kassem et al., 2020 <sup>72</sup>  | n=9    | Orderlies                             | Cross-sectional survey | 06/01 - 06/14 | Egypt                    | 11.11% | High     |
| Healthcare Support Occupations (31-0000) | Kassem et al., 2020 <sup>72</sup>  | n=9    | Orderlies                             | Cross-sectional survey | 06/01 - 06/14 | Egypt                    | 22.22% | High     |
| Healthcare Support Occupations (31-0000) | Hanrath et al., 2020 <sup>32</sup> | n=122  | Orderlies                             | Cross-sectional survey | 05/29 - 07/06 | The United Kingdom       | 9.02%  | High     |
| Healthcare Support Occupations (31-0000) | Lumley et al., 2020 <sup>9</sup>   | n=377  | Orderlies                             | Prospective cohort     | 04/23 - 11/30 | The United Kingdom       | 15.38% | Moderate |
| Healthcare Support Occupations (31-0000) | Rosser et al., 2020 <sup>33</sup>  | n=3959 | Medical Assistants                    | Cross-sectional survey | 04/20 - 05/20 | United States of America | 1.39%  | High     |
| Healthcare Support Occupations (31-0000) | Yogo et al., 2020 <sup>36</sup>    | n=106  | Phlebotomists                         | Cross-sectional survey | 05/20 - 06/08 | United States of America | 0%     | High     |
| Healthcare Support Occupations (31-0000) | Cavlek et al., 2020 <sup>56</sup>  | n=300  | Healthcare Support Workers, All Other | Cross-sectional survey | 04/25 - 05/24 | Croatia                  | 0.67%  | High     |
| Healthcare Support                       | Erber et al., 2020 <sup>31</sup>   | n=383  | Healthcare Support Workers, All Other | Cross-sectional survey | 04/14 - 05/29 | Germany                  | 2.34%  | High     |



|                                          |                                       |        |                                                                |                        |               |                          |                 |          |
|------------------------------------------|---------------------------------------|--------|----------------------------------------------------------------|------------------------|---------------|--------------------------|-----------------|----------|
| Occupations (31-0000)                    |                                       |        |                                                                |                        |               |                          |                 |          |
| Healthcare Support Occupations (31-0000) | Khan et al., 2020 <sup>127</sup>      | n=141  | Healthcare Support Workers, All Other                          | Cross-sectional survey | 06/15 - 06/29 | India                    | 0%              | Moderate |
| Protective Service Occupations (33-0000) | Shukla et al., 2020 <sup>177</sup>    | n=1713 | Protective Service Occupations                                 | Cross-sectional survey | 04/24 - 05/21 | United States of America | 1.46%           | Moderate |
| Protective Service Occupations (33-0000) | Martinez et al., 2020 <sup>121</sup>  | n=18   | First-Line Supervisors of Fire Fighting and Prevention Workers | Cross-sectional survey | 04/16 - 04/17 | United States of America | 0%              | High     |
| Protective Service Occupations (33-0000) | Martinez et al., 2020 <sup>121</sup>  | n=47   | First-Line Supervisors of Fire Fighting and Prevention Workers | Cross-sectional survey | 04/16 - 04/17 | United States of America | 14.89%          | High     |
| Protective Service Occupations (33-0000) | Martinez et al., 2020 <sup>121</sup>  | n=13   | First-Line Supervisors of Fire Fighting and Prevention Workers | Cross-sectional survey | 04/16 - 04/17 | United States of America | 7.69%           | High     |
| Protective Service Occupations (33-0000) | Akinbami et al., 2020 <sup>46</sup>   | n=330  | Firefighters                                                   | Cross-sectional survey | 05/18 - 06/13 | United States of America | 6.7% (4.2-9.9%) | Moderate |
| Protective Service Occupations (33-0000) | Gray et al., 2020 <sup>178</sup>      | n=132  | Firefighters                                                   | Cross-sectional survey | 05/01 - 05/31 | United States of America | 14%             | High     |
| Protective Service Occupations (33-0000) | Reuben et al., 2020 <sup>168</sup>    | n=62   | Firefighters                                                   | Cross-sectional survey | 05/28 - 07/15 | United States of America | 4.84%           | High     |
| Protective Service Occupations (33-0000) | Sabourin et al., 2020 <sup>35</sup>   | n=42   | Firefighters                                                   | Cross-sectional survey | 07/15 - 08/15 | United States of America | 2.38%           | High     |
| Protective Service Occupations (33-0000) | Tarabichi et al., 2020 <sup>170</sup> | n=185  | Firefighters                                                   | Cross-sectional survey | 04/20 - 05/19 | United States of America | 5.41%           | High     |

|                                          |                                      |        |                                      |                        |               |                          |               |          |
|------------------------------------------|--------------------------------------|--------|--------------------------------------|------------------------|---------------|--------------------------|---------------|----------|
| Protective Service Occupations (33-0000) | Martinez et al., 2020 <sup>121</sup> | n=7    | Fire Inspectors and Investigators    | Cross-sectional survey | 04/16 - 04/17 | United States of America | 14.29%        | High     |
| Protective Service Occupations (33-0000) | Akinbami et al., 2020 <sup>46</sup>  | n=785  | Police and Sheriff's Patrol Officers | Cross-sectional survey | 05/18 - 06/13 | United States of America | 4% (2.7-5.6%) | Moderate |
| Protective Service Occupations (33-0000) | Chughtai et al., 2020 <sup>179</sup> | n=154  | Police and Sheriff's Patrol Officers | Cross-sectional survey | 05/20 - 05/30 | Pakistan                 | 15.6%         | High     |
| Protective Service Occupations (33-0000) | Gudo et al., 2020 <sup>65</sup>      | n=564  | Police and Sheriff's Patrol Officers | Cross-sectional survey | 06/17 - 06/30 | Mozambique               | 6% (4-8%)     | High     |
| Protective Service Occupations (33-0000) | Gujski et al., 2020 <sup>180</sup>   | n=4026 | Police and Sheriff's Patrol Officers | Cross-sectional survey | 06/22 - 07/08 | Poland                   | 4.2%          | Moderate |
| Protective Service Occupations (33-0000) | Halatoko et al., 2020 <sup>41</sup>  | n=196  | Police and Sheriff's Patrol Officers | Cross-sectional survey | 04/23 - 05/08 | Togo                     | 0%            | High     |
| Protective Service Occupations (33-0000) | Langa et al., 2020 <sup>181</sup>    | n=471  | Police and Sheriff's Patrol Officers | Cross-sectional survey | 09/28 - 10/09 | Mozambique               | 1.5%          | High     |
| Protective Service Occupations (33-0000) | Macicame et al., 2020 <sup>182</sup> | n=456  | Police and Sheriff's Patrol Officers | Cross-sectional survey | 09/14 - 09/30 | Mozambique               | 4.39%         | High     |
| Protective Service Occupations (33-0000) | Mahomed et al., 2020 <sup>81</sup>   | n=554  | Police and Sheriff's Patrol Officers | Cross-sectional survey | 08/31 - 10/12 | Mozambique               | 2.9%          | High     |
| Protective Service Occupations (33-0000) | Reuben et al., 2020 <sup>168</sup>   | n=220  | Police and Sheriff's Patrol Officers | Cross-sectional survey | 05/28 - 07/15 | United States of America | 3.64%         | High     |
| Protective Service Occupations (33-0000) | Sabourin et al., 2020 <sup>35</sup>  | n=125  | Police and Sheriff's Patrol Officers | Cross-sectional survey | 07/15 - 08/15 | United States of America | 4%            | High     |

|                                                            |                                     |         |                                                  |                        |               |                          |       |          |
|------------------------------------------------------------|-------------------------------------|---------|--------------------------------------------------|------------------------|---------------|--------------------------|-------|----------|
| Protective Service Occupations (33-0000)                   | Shukla et al., 2020 <sup>177</sup>  | n=1643  | Police and Sheriff's Patrol Officers             | Cross-sectional survey | 04/24 - 05/21 | United States of America | 1.52% | Moderate |
| Protective Service Occupations (33-0000)                   | Siddiqui et al., 2020 <sup>2</sup>  | n=27    | Police and Sheriff's Patrol Officers             | Prospective cohort     | 04/15 - 08/15 | India                    | 7.4%  | High     |
| Protective Service Occupations (33-0000)                   | Viegas et al., 2020 <sup>110</sup>  | n=559   | Police and Sheriff's Patrol Officers             | Cross-sectional survey | 08/03 - 08/21 | Mozambique               | 3.94% | High     |
| Protective Service Occupations (33-0000)                   | Denyer et al., 2020 <sup>60</sup>   | n=38216 | Security Guards                                  | Cross-sectional survey | 05/12 - 05/18 | Japan                    | 0.23% | Unclear  |
| Protective Service Occupations (33-0000)                   | Mahumane et al., 2020 <sup>82</sup> | n=407   | Security Guards                                  | Cross-sectional survey | 11/02 - 11/17 | Mozambique               | 4.9%  | High     |
| Protective Service Occupations (33-0000)                   | Siddiqui et al., 2020 <sup>2</sup>  | n=9     | Security Guards                                  | Prospective cohort     | 04/15 - 08/15 | India                    | 0%    | High     |
| Protective Service Occupations (33-0000)                   | Silva et al., 2020 <sup>34</sup>    | n=32    | Security Guards                                  | Cross-sectional survey | 06/05 - 07/31 | Brazil                   | 34%   | High     |
| Protective Service Occupations (33-0000)                   | Thani et al., 2020 <sup>183</sup>   | n=61    | Security Guards                                  | Cross-sectional survey | 07/26 - 09/09 | Qatar                    | 60.1% | Moderate |
| Food Preparation and Serving Related Occupations (35-0000) | Thani et al., 2020 <sup>183</sup>   | n=93    | Food Preparation and Serving Related Occupations | Cross-sectional survey | 07/26 - 09/09 | Qatar                    | 29.2% | Moderate |
| Food Preparation and Serving Related Occupations (35-0000) | Siddiqui et al., 2020 <sup>2</sup>  | n=8     | Cooks, All Other                                 | Prospective cohort     | 04/15 - 08/15 | India                    | 37.5% | High     |
| Food Preparation and Serving                               | Brunner et al., 2020 <sup>54</sup>  | n=8     | Food Preparation Workers                         | Cross-sectional survey | 05/04 - 05/29 | United States of America | 0%    | High     |

|    |                                                                     |                                       |       |                                                           |                                                                                   |               |                          |       |          |
|----|---------------------------------------------------------------------|---------------------------------------|-------|-----------------------------------------------------------|-----------------------------------------------------------------------------------|---------------|--------------------------|-------|----------|
| 1  | Related Occupations (35-0000)                                       |                                       |       |                                                           |                                                                                   |               |                          |       |          |
| 2  |                                                                     |                                       |       |                                                           |                                                                                   |               |                          |       |          |
| 3  |                                                                     |                                       |       |                                                           |                                                                                   |               |                          |       |          |
| 4  | Healthcare Support Occupations (31-0000)                            | Rosser et al., 2020 <sup>33</sup>     | n=335 | Healthcare Support Occupations                            | Cross-sectional survey                                                            | 04/20 - 05/20 | United States of America | 3.58% | High     |
| 5  |                                                                     |                                       |       |                                                           |                                                                                   |               |                          |       |          |
| 6  |                                                                     |                                       |       |                                                           |                                                                                   |               |                          |       |          |
| 7  | Food Preparation and Serving Related Occupations (35-0000)          | Biggs et al., 2020 <sup>3</sup>       | n=24  | Food Servers, Nonrestaurant                               | Cross-sectional survey                                                            | 04/28 - 05/03 | United States of America | 4.17% | Moderate |
| 8  |                                                                     |                                       |       |                                                           |                                                                                   |               |                          |       |          |
| 9  |                                                                     |                                       |       |                                                           |                                                                                   |               |                          |       |          |
| 10 |                                                                     |                                       |       |                                                           |                                                                                   |               |                          |       |          |
| 11 | Food Preparation and Serving Related Occupations (35-0000)          | Leidner et al., 2020 <sup>22</sup>    | n=113 | Food Servers, Nonrestaurant                               | Cross sectional study with prospective cohort follow up of a subset of the sample | 04/08 - 05/22 | United States of America | 1.77% | High     |
| 12 |                                                                     |                                       |       |                                                           |                                                                                   |               |                          |       |          |
| 13 |                                                                     |                                       |       |                                                           |                                                                                   |               |                          |       |          |
| 14 |                                                                     |                                       |       |                                                           |                                                                                   |               |                          |       |          |
| 15 |                                                                     |                                       |       |                                                           |                                                                                   |               |                          |       |          |
| 16 | Food Preparation and Serving Related Occupations (35-0000)          | Hanrath et al., 2020 <sup>32</sup>    | n=340 | Other Food Preparation and Serving Related Workers        | Cross-sectional survey                                                            | 05/29 - 07/06 | The United Kingdom       | 8.53% | High     |
| 17 |                                                                     |                                       |       |                                                           |                                                                                   |               |                          |       |          |
| 18 |                                                                     |                                       |       |                                                           |                                                                                   |               |                          |       |          |
| 19 |                                                                     |                                       |       |                                                           |                                                                                   |               |                          |       |          |
| 20 |                                                                     |                                       |       |                                                           |                                                                                   |               |                          |       |          |
| 21 |                                                                     |                                       |       |                                                           |                                                                                   |               |                          |       |          |
| 22 | Building and Grounds Cleaning and Maintenance Occupations (37-0000) | Martin et al., 2020 <sup>23</sup>     | n=528 | Building and Grounds Cleaning and Maintenance Occupations | Cross-sectional survey                                                            | 05/29 - 07/13 | The United Kingdom       | 8.14% | Moderate |
| 23 |                                                                     |                                       |       |                                                           |                                                                                   |               |                          |       |          |
| 24 |                                                                     |                                       |       |                                                           |                                                                                   |               |                          |       |          |
| 25 |                                                                     |                                       |       |                                                           |                                                                                   |               |                          |       |          |
| 26 |                                                                     |                                       |       |                                                           |                                                                                   |               |                          |       |          |
| 27 | Building and Grounds Cleaning and Maintenance Occupations (37-0000) | Brousseau et al., 2020 <sup>134</sup> | n=102 | Building Cleaning and Pest Control Workers                | Cross-sectional survey                                                            | 07/06 - 09/24 | Canada                   | 10.8% | High     |
| 28 |                                                                     |                                       |       |                                                           |                                                                                   |               |                          |       |          |
| 29 |                                                                     |                                       |       |                                                           |                                                                                   |               |                          |       |          |
| 30 |                                                                     |                                       |       |                                                           |                                                                                   |               |                          |       |          |
| 31 |                                                                     |                                       |       |                                                           |                                                                                   |               |                          |       |          |
| 32 | Building and Grounds Cleaning and Maintenance Occupations (37-0000) | Chau et al., 2020 <sup>126</sup>      | n=42  | Building Cleaning and Pest Control Workers                | Cross-sectional survey                                                            | 08/23 - 08/30 | Viet Nam                 | 0%    | High     |
| 33 |                                                                     |                                       |       |                                                           |                                                                                   |               |                          |       |          |
| 34 |                                                                     |                                       |       |                                                           |                                                                                   |               |                          |       |          |
| 35 |                                                                     |                                       |       |                                                           |                                                                                   |               |                          |       |          |
| 36 |                                                                     |                                       |       |                                                           |                                                                                   |               |                          |       |          |
| 37 |                                                                     |                                       |       |                                                           |                                                                                   |               |                          |       |          |
| 38 |                                                                     |                                       |       |                                                           |                                                                                   |               |                          |       |          |
| 39 |                                                                     |                                       |       |                                                           |                                                                                   |               |                          |       |          |
| 40 |                                                                     |                                       |       |                                                           |                                                                                   |               |                          |       |          |
| 41 |                                                                     |                                       |       |                                                           |                                                                                   |               |                          |       |          |
| 42 |                                                                     |                                       |       |                                                           |                                                                                   |               |                          |       |          |
| 43 |                                                                     |                                       |       |                                                           |                                                                                   |               |                          |       |          |
| 44 |                                                                     |                                       |       |                                                           |                                                                                   |               |                          |       |          |
| 45 |                                                                     |                                       |       |                                                           |                                                                                   |               |                          |       |          |
| 46 |                                                                     |                                       |       |                                                           |                                                                                   |               |                          |       |          |
| 47 |                                                                     |                                       |       |                                                           |                                                                                   |               |                          |       |          |

|                                                                     |                                          |       |                                                               |                        |               |                          |        |          |
|---------------------------------------------------------------------|------------------------------------------|-------|---------------------------------------------------------------|------------------------|---------------|--------------------------|--------|----------|
| Occupations (37-0000)                                               |                                          |       |                                                               |                        |               |                          |        |          |
| Building and Grounds Cleaning and Maintenance Occupations (37-0000) | Finkenzeller et al., 2020 <sup>158</sup> | n=57  | Building Cleaning and Pest Control Workers                    | Prospective cohort     | 06/29 - 07/29 | Germany                  | 19.3%  | Moderate |
| Building and Grounds Cleaning and Maintenance Occupations (37-0000) | Chau et al., 2020 <sup>126</sup>         | n=6   | Janitors and Cleaners, Except Maids and Housekeeping Cleaners | Cross-sectional survey | 08/23 - 08/30 | Viet Nam                 | 0%     | High     |
| Building and Grounds Cleaning and Maintenance Occupations (37-0000) | Epstude et al., 2020 <sup>184</sup>      | n=45  | Janitors and Cleaners, Except Maids and Housekeeping Cleaners | Cross-sectional survey | 06/15 - 06/30 | Germany                  | 0%     | High     |
| Building and Grounds Cleaning and Maintenance Occupations (37-0000) | Thani et al., 2020 <sup>183</sup>        | n=105 | Janitors and Cleaners, Except Maids and Housekeeping Cleaners | Cross-sectional survey | 07/26 - 09/09 | Qatar                    | 54.5%  | Moderate |
| Building and Grounds Cleaning and Maintenance Occupations (37-0000) | Brunner et al., 2020 <sup>54</sup>       | n=23  | Maids and Housekeeping Cleaners                               | Cross-sectional survey | 05/04 - 05/29 | United States of America | 0%     | High     |
| Building and Grounds Cleaning and Maintenance Occupations (37-0000) | Goenka et al., 2020 <sup>25</sup>        | n=226 | Maids and Housekeeping Cleaners                               | Cross-sectional survey | 07/12 - 08/23 | India                    | 26.11% | Moderate |
| Building and Grounds Cleaning and Maintenance Occupations (37-0000) | Goenka et al., 2020 <sup>26</sup>        | n=10  | Maids and Housekeeping Cleaners                               | Cross-sectional survey | 08/01 - 08/31 | India                    | 10%    | High     |

|                                                                     |                                    |        |                                 |                                                                                   |               |                            |                  |          |
|---------------------------------------------------------------------|------------------------------------|--------|---------------------------------|-----------------------------------------------------------------------------------|---------------|----------------------------|------------------|----------|
| Building and Grounds Cleaning and Maintenance Occupations (37-0000) | Hanrath et al., 2020 <sup>32</sup> | n=515  | Maids and Housekeeping Cleaners | Cross-sectional survey                                                            | 05/29 - 07/06 | The United Kingdom         | 13.2%            | High     |
| Building and Grounds Cleaning and Maintenance Occupations (37-0000) | Khan et al., 2020 <sup>127</sup>   | n=276  | Maids and Housekeeping Cleaners | Cross-sectional survey                                                            | 06/15 - 06/29 | India                      | 3.3% (1.7-6.2%)  | Moderate |
| Building and Grounds Cleaning and Maintenance Occupations (37-0000) | Leidner et al., 2020 <sup>22</sup> | n=137  | Maids and Housekeeping Cleaners | Cross sectional study with prospective cohort follow up of a subset of the sample | 04/08 - 05/22 | United States of America   | 8.03%            | High     |
| Building and Grounds Cleaning and Maintenance Occupations (37-0000) | Moscola et al., 2020 <sup>89</sup> | n=7314 | Maids and Housekeeping Cleaners | Cross-sectional survey                                                            | 04/20 - 06/23 | United States of America   | 20.9%            | High     |
| Building and Grounds Cleaning and Maintenance Occupations (37-0000) | Shakiba et al., 2020 <sup>10</sup> | n=159  | Maids and Housekeeping Cleaners | Cross-sectional survey                                                            | 04/11 - 04/19 | Iran (Islamic Republic of) | 25% (13.6-37.5%) | Moderate |
| Building and Grounds Cleaning and Maintenance Occupations (37-0000) | Shields et al., 2020 <sup>97</sup> | n=29   | Maids and Housekeeping Cleaners | Cross-sectional survey                                                            | 04/24 - 04/25 | The United Kingdom         | 34.5%            | High     |
| Building and Grounds Cleaning and Maintenance Occupations (37-0000) | Siddiqui et al., 2020 <sup>2</sup> | n=46   | Maids and Housekeeping Cleaners | Prospective cohort                                                                | 04/15 - 08/15 | India                      | 21.7%            | High     |

|                                                                |                                                 |                                     |       |                                                |                        |               |                          |                    |          |
|----------------------------------------------------------------|-------------------------------------------------|-------------------------------------|-------|------------------------------------------------|------------------------|---------------|--------------------------|--------------------|----------|
| 1<br>2<br>3<br>4<br>5<br>6<br>7                                | Personal Care and Service Occupations (39-0000) | Biggs et al., 2020 <sup>3</sup>     | n=10  | Hairdressers, Hairstylists, and Cosmetologists | Cross-sectional survey | 04/28 - 05/03 | United States of America | 10%                | Moderate |
| 8<br>9<br>10<br>11                                             | Personal Care and Service Occupations (39-0000) | Biggs et al., 2020 <sup>3</sup>     | n=48  | Childcare Workers                              | Cross-sectional survey | 04/28 - 05/03 | United States of America | 0%                 | Moderate |
| 12<br>13<br>14<br>15                                           | Personal Care and Service Occupations (39-0000) | Chen et al., 2020 <sup>135</sup>    | n=11  | Personal Care Aides                            | Cross-sectional survey | 02/19 - 02/19 | China                    | 9.09%              | High     |
| 16<br>17<br>18<br>19                                           | Personal Care and Service Occupations (39-0000) | Galan et al., 2020 <sup>20</sup>    | n=337 | Personal Care Aides                            | Cross-sectional survey | 04/14 - 04/27 | Spain                    | 27.89%             | High     |
| 20<br>21<br>22<br>23                                           | Personal Care and Service Occupations (39-0000) | Galan et al., 2020 <sup>20</sup>    | n=168 | Personal Care Aides                            | Cross-sectional survey | 04/14 - 04/27 | Spain                    | 27.38%             | High     |
| 24<br>25<br>26<br>27                                           | Personal Care and Service Occupations (39-0000) | Godbout et al., 2020 <sup>138</sup> | n=86  | Personal Care Aides                            | Cross-sectional survey | 07/27 - 10/02 | United States of America | 2.32%              | High     |
| 28<br>29<br>30<br>31<br>32                                     | Personal Care and Service Occupations (39-0000) | Hassan et al., 2020 <sup>185</sup>  | n=403 | Personal Care Aides                            | Cross-sectional survey | 05/11 - 06/17 | Sweden                   | 20.1%              | High     |
| 33<br>34<br>35<br>36                                           | Personal Care and Service Occupations (39-0000) | Kumar et al., 2020 <sup>142</sup>   | n=292 | Personal Care Aides                            | Cross-sectional survey | 06/01 - 06/30 | India                    | 18.5% (14.5-23.3%) | High     |
| 37<br>38<br>39<br>40<br>41<br>42<br>43<br>44<br>45<br>46<br>47 | Personal Care and Service Occupations (39-0000) | Ladhani et al., 2020 <sup>186</sup> | n=208 | Personal Care Aides                            | Prospective cohort     | 04/10 - 04/13 | The United Kingdom       | 75% (68.7-80.4%)   | High     |

|                                                 |                                       |        |                               |                        |               |                          |                    |          |
|-------------------------------------------------|---------------------------------------|--------|-------------------------------|------------------------|---------------|--------------------------|--------------------|----------|
| Personal Care and Service Occupations (39-0000) | Lindahl et al., 2020 <sup>187</sup>   | n=1005 | Personal Care Aides           | Cross-sectional survey | 04/01 - 04/20 | Sweden                   | 22.9% (20.4-25.7%) | High     |
| Personal Care and Service Occupations (39-0000) | Regan et al., 2020 <sup>188</sup>     | n=305  | Personal Care Aides           | Cross-sectional survey | 04/15 - 05/06 | United States of America | 23.6%              | Unclear  |
| Personal Care and Service Occupations (39-0000) | Siddiqui et al., 2020 <sup>2</sup>    | n=5    | Personal Care Aides           | Prospective cohort     | 04/15 - 08/15 | India                    | 40%                | High     |
| Personal Care and Service Occupations (39-0000) | Venugopal et al., 2020 <sup>150</sup> | n=72   | Personal Care Aides           | Cross-sectional survey | 03/01 - 05/01 | United States of America | 28%                | Moderate |
| Personal Care and Service Occupations (39-0000) | Viegas et al., 2020 <sup>110</sup>    | n=85   | Personal Care Aides           | Cross-sectional survey | 08/03 - 08/21 | Mozambique               | 1.18%              | High     |
| Sales and Related Occupations (41-0000)         | Arnaldo et al., 2020 <sup>13</sup>    | n=928  | Sales and Related Occupations | Cross-sectional survey | 07/06 - 07/13 | Mozambique               | 6.5%               | High     |
| Sales and Related Occupations (41-0000)         | Arnaldo et al., 2020 <sup>48</sup>    | n=1123 | Sales and Related Occupations | Cross-sectional survey | 08/10 - 08/21 | Mozambique               | 1.6%               | High     |
| Sales and Related Occupations (41-0000)         | Langa et al., 2020 <sup>181</sup>     | n=871  | Sales and Related Occupations | Cross-sectional survey | 09/28 - 10/09 | Mozambique               | 0.2%               | High     |
| Sales and Related Occupations (41-0000)         | Mabunda et al., 2020 <sup>15</sup>    | n=1585 | Sales and Related Occupations | Cross-sectional survey | 09/21 - 10/02 | Mozambique               | 8.3%               | High     |
| Sales and Related Occupations (41-0000)         | Macicame et al., 2020 <sup>182</sup>  | n=1288 | Sales and Related Occupations | Cross-sectional survey | 09/14 - 09/30 | Mozambique               | 4.97%              | High     |



|                                         |                                     |         |                               |                        |               |                            |                    |          |
|-----------------------------------------|-------------------------------------|---------|-------------------------------|------------------------|---------------|----------------------------|--------------------|----------|
| Sales and Related Occupations (41-0000) | Mahomed et al., 2020 <sup>81</sup>  | n=1556  | Sales and Related Occupations | Cross-sectional survey | 08/31 - 10/12 | Mozambique                 | 0.8%               | High     |
| Sales and Related Occupations (41-0000) | Mahumane et al., 2020 <sup>82</sup> | n=643   | Sales and Related Occupations | Cross-sectional survey | 11/02 - 11/17 | Mozambique                 | 1.9%               | High     |
| Sales and Related Occupations (41-0000) | Arnaldo et al., 2020 <sup>14</sup>  | n=472   | Sales and Related Occupations | Cross-sectional survey | 11/16 - 11/21 | Mozambique                 | 6.8%               | High     |
| Sales and Related Occupations (41-0000) | Arnaldo et al., 2020 <sup>14</sup>  | n=460   | Sales and Related Occupations | Cross-sectional survey | 11/02 - 11/12 | Mozambique                 | 5.9%               | High     |
| Sales and Related Occupations (41-0000) | Mahomed et al., 2020 <sup>16</sup>  | n=517   | Sales and Related Occupations | Cross-sectional survey | 11/26 - 12/03 | Mozambique                 | 8.9%               | High     |
| Sales and Related Occupations (41-0000) | Mahomed et al., 2020 <sup>16</sup>  | n=1001  | Sales and Related Occupations | Cross-sectional survey | 11/07 - 11/21 | Mozambique                 | 4.5%               | High     |
| Sales and Related Occupations (41-0000) | Biggs et al., 2020 <sup>3</sup>     | n=19    | Retail Sales Workers          | Cross-sectional survey | 04/28 - 05/03 | United States of America   | 0%                 | Moderate |
| Sales and Related Occupations (41-0000) | Poustchi et al., 2020 <sup>28</sup> | n=753   | Cashiers                      | Cross-sectional survey | 04/17 - 06/02 | Iran (Islamic Republic of) | 16.1% (12.9-19.2%) | Moderate |
| Sales and Related Occupations (41-0000) | Alali et al., 2020 <sup>189</sup>   | n=525   | Cashiers                      | Cross-sectional survey | 05/23 - 06/26 | Kuwait                     | 38.1% (34-42.3%)   | High     |
| Sales and Related Occupations (41-0000) | Denyer et al., 2020 <sup>60</sup>   | n=19075 | Retail Salespersons           | Cross-sectional survey | 05/12 - 05/18 | Japan                      | 0.04%              | Unclear  |
| Sales and Related Occupations (41-0000) | Kern et al., 2020 <sup>73</sup>     | n=300   | Retail Salespersons           | Cross-sectional survey | 04/09 - 04/16 | Germany                    | 0.33% (0.01-1.84%) | High     |



|                                                         |                                        |        |                                               |                        |               |                          |                   |          |
|---------------------------------------------------------|----------------------------------------|--------|-----------------------------------------------|------------------------|---------------|--------------------------|-------------------|----------|
| Office and Administrative Support Occupations (43-0000) | Rosser et al., 2020 <sup>33</sup>      | n=972  | Office and Administrative Support Occupations | Cross-sectional survey | 04/20 - 05/20 | United States of America | 1.34%             | High     |
| Office and Administrative Support Occupations (43-0000) | Tsitsilonis et al., 2020 <sup>12</sup> | n=504  | Office and Administrative Support Occupations | Cross-sectional survey | 06/15 - 07/15 | Greece                   | 0.48% (0-2.37%)   | Moderate |
| Office and Administrative Support Occupations (43-0000) | Khan et al., 2020 <sup>45</sup>        | n=37   | Hotel, Motel, and Resort Desk Clerks          | Cross-sectional survey | 07/01 - 07/15 | India                    | 10.8% (4.1-25.5%) | Moderate |
| Office and Administrative Support Occupations (43-0000) | Brunner et al., 2020 <sup>54</sup>     | n=26   | Receptionists and Information Clerks          | Cross-sectional survey | 05/04 - 05/29 | United States of America | 0%                | High     |
| Office and Administrative Support Occupations (43-0000) | Favara et al., 2020 <sup>136</sup>     | n=10   | Receptionists and Information Clerks          | Prospective cohort     | 06/01 - 06/07 | The United Kingdom       | 0%                | High     |
| Office and Administrative Support Occupations (43-0000) | Moscola et al., 2020 <sup>89</sup>     | n=9645 | Receptionists and Information Clerks          | Cross-sectional survey | 04/20 - 06/23 | United States of America | 12.6%             | High     |
| Office and Administrative Support Occupations (43-0000) | Biggs et al., 2020 <sup>3</sup>        | n=11   | Shipping, Receiving, and Traffic Clerks       | Cross-sectional survey | 04/28 - 05/03 | United States of America | 18.18%            | Moderate |
| Office and Administrative                               | Silva et al., 2020 <sup>34</sup>       | n=82   | Stock Clerks and Order Fillers                | Cross-sectional survey | 06/05 - 07/31 | Brazil                   | 4.88%             | High     |

|                                                         |                                     |        |                                                               |                        |               |                          |                 |          |
|---------------------------------------------------------|-------------------------------------|--------|---------------------------------------------------------------|------------------------|---------------|--------------------------|-----------------|----------|
| Support Occupations (43-0000)                           |                                     |        |                                                               |                        |               |                          |                 |          |
| Office and Administrative Support Occupations (43-0000) | Khan et al., 2020 <sup>45</sup>     | n=186  | Secretaries and Administrative Assistants                     | Cross-sectional survey | 07/01 - 07/15 | India                    | 3.8% (1.8-7.7%) | Moderate |
| Office and Administrative Support Occupations (43-0000) | Alemu et al., 2020 <sup>6</sup>     | n=48   | Executive Secretaries and Executive Administrative Assistants | Cross-sectional survey | 04/23 - 04/28 | Ethiopia                 | 2.1%            | Moderate |
| Office and Administrative Support Occupations (43-0000) | Barallat et al., 2020 <sup>50</sup> | n=1181 | Executive Secretaries and Executive Administrative Assistants | Cross-sectional survey | 05/04 - 05/22 | Spain                    | 6.52%           | High     |
| Office and Administrative Support Occupations (43-0000) | Lumley et al., 2020 <sup>9</sup>    | n=1557 | Executive Secretaries and Executive Administrative Assistants | Prospective cohort     | 04/23 - 11/30 | The United Kingdom       | 6.74%           | Moderate |
| Office and Administrative Support Occupations (43-0000) | Reuben et al., 2020 <sup>168</sup>  | n=18   | Executive Secretaries and Executive Administrative Assistants | Cross-sectional survey | 05/28 - 07/15 | United States of America | 0%              | High     |
| Office and Administrative Support Occupations (43-0000) | Akinbami et al., 2020 <sup>46</sup> | n=964  | Medical Secretaries                                           | Cross-sectional survey | 05/18 - 06/13 | United States of America | 8% (6.4-9.9%)   | Moderate |
| Office and Administrative Support                       | Alharbi et al., 2020 <sup>125</sup> | n=8    | Medical Secretaries                                           | Cross-sectional survey | 04/18 - 06/17 | Saudi Arabia             | 25%             | High     |

|                                                         |                                          |        |                     |                                                              |               |                          |       |          |
|---------------------------------------------------------|------------------------------------------|--------|---------------------|--------------------------------------------------------------|---------------|--------------------------|-------|----------|
| Occupations (43-0000)                                   |                                          |        |                     |                                                              |               |                          |       |          |
| Office and Administrative Support Occupations (43-0000) | Dimcheff et al., 2020 <sup>157</sup>     | n=357  | Medical Secretaries | Cross-sectional survey                                       | 06/08 - 07/08 | United States of America | 4.2%  | Moderate |
| Office and Administrative Support Occupations (43-0000) | Erber et al., 2020 <sup>31</sup>         | n=557  | Medical Secretaries | Cross-sectional survey                                       | 04/14 - 05/29 | Germany                  | 3.78% | High     |
| Office and Administrative Support Occupations (43-0000) | Finkenzeller et al., 2020 <sup>158</sup> | n=240  | Medical Secretaries | Prospective cohort                                           | 06/29 - 07/29 | Germany                  | 7.1%  | Moderate |
| Office and Administrative Support Occupations (43-0000) | Goenka et al., 2020 <sup>25</sup>        | n=75   | Medical Secretaries | Cross-sectional survey                                       | 07/12 - 08/23 | India                    | 8%    | Moderate |
| Office and Administrative Support Occupations (43-0000) | Goenka et al., 2020 <sup>25</sup>        | n=75   | Medical Secretaries | Cross-sectional survey                                       | 07/12 - 08/23 | India                    | 8%    | Moderate |
| Office and Administrative Support Occupations (43-0000) | Iversen et al., 2020 <sup>8</sup>        | n=2631 | Medical Secretaries | Cross-sectional survey                                       | 04/15 - 04/22 | Denmark                  | 2.7%  | Low      |
| Office and Administrative Support Occupations (43-0000) | Leidner et al., 2020 <sup>22</sup>       | n=793  | Medical Secretaries | Cross sectional study with prospective cohort follow up of a | 04/08 - 05/22 | United States of America | 3.15% | High     |

|                                                         |                                    |        |                        |                        |               |                    |                |          |
|---------------------------------------------------------|------------------------------------|--------|------------------------|------------------------|---------------|--------------------|----------------|----------|
|                                                         |                                    |        |                        | subset of the sample   |               |                    |                |          |
| Office and Administrative Support Occupations (43-0000) | Mesnil et al., 2020 <sup>143</sup> | n=184  | Medical Secretaries    | Cross-sectional survey | 06/08 - 06/22 | France             | 14.13%         | High     |
| Office and Administrative Support Occupations (43-0000) | Nishida et al., 2020 <sup>90</sup> | n=98   | Medical Secretaries    | Cross-sectional survey | 06/12 - 06/19 | Japan              | 1% (0.18-5.6%) | Moderate |
| Office and Administrative Support Occupations (43-0000) | Noor et al., 2020 <sup>130</sup>   | n=91   | Medical Secretaries    | Cross-sectional survey | 07/13 - 07/15 | Pakistan           | 43.96%         | Moderate |
| Office and Administrative Support Occupations (43-0000) | Thani et al., 2020 <sup>183</sup>  | n=82   | Medical Secretaries    | Cross-sectional survey | 07/26 - 09/09 | Qatar              | 31.6%          | Moderate |
| Office and Administrative Support Occupations (43-0000) | Zhou et al., 2020 <sup>166</sup>   | n=505  | Medical Secretaries    | Cross-sectional survey | 03/16 - 03/25 | China              | 1.39%          | Moderate |
| Office and Administrative Support Occupations (43-0000) | Chau et al., 2020 <sup>126</sup>   | n=20   | Data Entry Keyers      | Cross-sectional survey | 08/23 - 08/30 | Viet Nam           | 0%             | High     |
| Office and Administrative Support Occupations (43-0000) | Jones et al., 2020 <sup>29</sup>   | n=1233 | Office Clerks, General | Cross-sectional survey | 01/15 - 06/15 | The United Kingdom | 6.1%           | High     |

|                                                         |                                      |       |                                                      |                        |               |                          |        |          |
|---------------------------------------------------------|--------------------------------------|-------|------------------------------------------------------|------------------------|---------------|--------------------------|--------|----------|
| Office and Administrative Support Occupations (43-0000) | Rosser et al., 2020 <sup>33</sup>    | n=218 | Office Clerks, General                               | Cross-sectional survey | 04/20 - 05/20 | United States of America | 0%     | High     |
| Office and Administrative Support Occupations (43-0000) | Satpati et al., 2020 <sup>27</sup>   | n=47  | Office Clerks, General                               | Cross-sectional survey | 07/26 - 08/08 | India                    | 4.26%  | Moderate |
| Office and Administrative Support Occupations (43-0000) | Baracco et al., 2020 <sup>24</sup>   | n=194 | Office and Administrative Support Workers, All Other | Cross-sectional survey | 04/23 - 05/05 | Italy                    | 14.4%  | High     |
| Office and Administrative Support Occupations (43-0000) | Brzostek et al., 2020 <sup>151</sup> | n=286 | Office and Administrative Support Workers, All Other | Cross-sectional survey | 04/17 - 05/07 | United States of America | 45.5%  | Moderate |
| Office and Administrative Support Occupations (43-0000) | Kassem et al., 2020 <sup>72</sup>    | n=7   | Office and Administrative Support Workers, All Other | Cross-sectional survey | 06/01 - 06/14 | Egypt                    | 14.28% | High     |
| Office and Administrative Support Occupations (43-0000) | Kassem et al., 2020 <sup>72</sup>    | n=7   | Office and Administrative Support Workers, All Other | Cross-sectional survey | 06/01 - 06/14 | Egypt                    | 0%     | High     |
| Office and Administrative Support Occupations (43-0000) | Kassem et al., 2020 <sup>72</sup>    | n=7   | Office and Administrative Support Workers, All Other | Cross-sectional survey | 06/01 - 06/14 | Egypt                    | 0%     | High     |

|                                                             |                                     |        |                                                               |                        |               |                          |        |          |
|-------------------------------------------------------------|-------------------------------------|--------|---------------------------------------------------------------|------------------------|---------------|--------------------------|--------|----------|
| Office and Administrative Support Occupations (43-0000)     | Kassem et al., 2020 <sup>72</sup>   | n=7    | Office and Administrative Support Workers, All Other          | Cross-sectional survey | 06/01 - 06/14 | Egypt                    | 14.28% | High     |
| Farming, Fishing, and Forestry Occupations (45-0000)        | Satpati et al., 2020 <sup>27</sup>  | n=53   | Agricultural Workers                                          | Cross-sectional survey | 07/26 - 08/08 | India                    | 0%     | Moderate |
| Farming, Fishing, and Forestry Occupations (45-0000)        | Addetia et al., 2020 <sup>190</sup> | n=120  | Fishers and Related Fishing Workers                           | Retrospective cohort   | 05/01 - 05/31 | United States of America | 5%     | High     |
| Farming, Fishing, and Forestry Occupations (45-0000)        | Arnaldo et al., 2020 <sup>13</sup>  | n=80   | Fishers and Related Fishing Workers                           | Cross-sectional survey | 07/06 - 07/13 | Mozambique               | 5%     | High     |
| Construction and Extraction Occupations (47-0000)           | Biggs et al., 2020 <sup>3</sup>     | n=42   | Construction Trades Workers                                   | Cross-sectional survey | 04/28 - 05/03 | United States of America | 0%     | Moderate |
| Installation, Maintenance, and Repair Occupations (49-0000) | Blairon et al., 2020 <sup>52</sup>  | n=134  | Other Installation, Maintenance, and Repair Occupations       | Cross-sectional survey | 05/25 - 06/19 | Belgium                  | 16.4%  | High     |
| Production Occupations (51-0000)                            | Picon et al., 2020 <sup>191</sup>   | n=40   | Butchers and Other Meat, Poultry, and Fish Processing Workers | Cross-sectional survey | 06/13 - 06/17 | Brazil                   | 15%    | Moderate |
| Production Occupations (51-0000)                            | Picon et al., 2020 <sup>191</sup>   | n=1087 | Miscellaneous Food Processing Workers                         | Cross-sectional survey | 06/13 - 06/17 | Brazil                   | 1.47%  | Moderate |
| Production Occupations (51-0000)                            | Bontadi et al., 2020 <sup>192</sup> | n=1267 | Production Workers, All Other                                 | Cross-sectional survey | 04/11 - 04/29 | Italy                    | 1.58%  | High     |



|                                                                                                                                                                                                                                                                               |                                                          |                                      |       |                                                |                        |               |                          |                 |          |
|-------------------------------------------------------------------------------------------------------------------------------------------------------------------------------------------------------------------------------------------------------------------------------|----------------------------------------------------------|--------------------------------------|-------|------------------------------------------------|------------------------|---------------|--------------------------|-----------------|----------|
| 1<br>2<br>3<br>4<br>5<br>6<br>7<br>8<br>9<br>10<br>11<br>12<br>13<br>14<br>15<br>16<br>17<br>18<br>19<br>20<br>21<br>22<br>23<br>24<br>25<br>26<br>27<br>28<br>29<br>30<br>31<br>32<br>33<br>34<br>35<br>36<br>37<br>38<br>39<br>40<br>41<br>42<br>43<br>44<br>45<br>46<br>47 | Production Occupations (51-0000)                         | Xu et al., 2020 <sup>193</sup>       | n=442 | Production Workers, All Other                  | Cross-sectional survey | 03/09 - 04/10 | China                    | 1.4% (0.6-2.9%) | High     |
|                                                                                                                                                                                                                                                                               | Transportation and Material Moving Occupations (53-0000) | Arnaldo et al., 2020 <sup>13</sup>   | n=248 | Transportation and Material Moving Occupations | Cross-sectional survey | 07/06 - 07/13 | Mozambique               | 4.8%            | High     |
|                                                                                                                                                                                                                                                                               | Transportation and Material Moving Occupations (53-0000) | Arnaldo et al., 2020 <sup>48</sup>   | n=367 | Transportation and Material Moving Occupations | Cross-sectional survey | 08/10 - 08/21 | Mozambique               | 7.4%            | High     |
|                                                                                                                                                                                                                                                                               | Transportation and Material Moving Occupations (53-0000) | Arnaldo et al., 2020 <sup>14</sup>   | n=112 | Transportation and Material Moving Occupations | Cross-sectional survey | 11/16 - 11/21 | Mozambique               | 16.1%           | High     |
|                                                                                                                                                                                                                                                                               | Transportation and Material Moving Occupations (53-0000) | Biggs et al., 2020 <sup>3</sup>      | n=14  | Transportation and Material Moving Occupations | Cross-sectional survey | 04/28 - 05/03 | United States of America | 0%              | Moderate |
|                                                                                                                                                                                                                                                                               | Transportation and Material Moving Occupations (53-0000) | Gudo et al., 2020 <sup>65</sup>      | n=554 | Transportation and Material Moving Occupations | Cross-sectional survey | 06/17 - 06/30 | Mozambique               | 3% (1-4%)       | High     |
|                                                                                                                                                                                                                                                                               | Transportation and Material Moving Occupations (53-0000) | Langa et al., 2020 <sup>181</sup>    | n=230 | Transportation and Material Moving Occupations | Cross-sectional survey | 09/28 - 10/09 | Mozambique               | 0.4%            | High     |
|                                                                                                                                                                                                                                                                               | Transportation and Material Moving Occupations (53-0000) | Mabunda et al., 2020 <sup>15</sup>   | n=473 | Transportation and Material Moving Occupations | Cross-sectional survey | 09/21 - 10/02 | Mozambique               | 8.7%            | High     |
|                                                                                                                                                                                                                                                                               | Transportation and Material Moving Occupations (53-0000) | Macicame et al., 2020 <sup>182</sup> | n=282 | Transportation and Material Moving Occupations | Cross-sectional survey | 09/14 - 09/30 | Mozambique               | 3.19%           | High     |

|                                                          |                                      |       |                                                                        |                        |               |                          |                  |          |
|----------------------------------------------------------|--------------------------------------|-------|------------------------------------------------------------------------|------------------------|---------------|--------------------------|------------------|----------|
| Transportation and Material Moving Occupations (53-0000) | Mahomed et al., 2020 <sup>81</sup>   | n=334 | Transportation and Material Moving Occupations                         | Cross-sectional survey | 08/31 - 10/12 | Mozambique               | 1.5%             | High     |
| Transportation and Material Moving Occupations (53-0000) | Mahumane et al., 2020 <sup>82</sup>  | n=287 | Transportation and Material Moving Occupations                         | Cross-sectional survey | 11/02 - 11/17 | Mozambique               | 1%               | High     |
| Transportation and Material Moving Occupations (53-0000) | Thani et al., 2020 <sup>183</sup>    | n=435 | Transportation and Material Moving Occupations                         | Cross-sectional survey | 07/26 - 09/09 | Qatar                    | 53.4%            | Moderate |
| Transportation and Material Moving Occupations (53-0000) | Halatoko et al., 2020 <sup>41</sup>  | n=212 | Air Transportation Workers                                             | Cross-sectional survey | 04/23 - 05/08 | Togo                     | 0.9%             | High     |
| Transportation and Material Moving Occupations (53-0000) | Viegas et al., 2020 <sup>110</sup>   | n=623 | Air Transportation Workers                                             | Cross-sectional survey | 08/03 - 08/21 | Mozambique               | 2.25%            | High     |
| Transportation and Material Moving Occupations (53-0000) | Viegas et al., 2020 <sup>110</sup>   | n=362 | Air Transportation Workers                                             | Cross-sectional survey | 08/03 - 08/21 | Mozambique               | 3.31%            | High     |
| Transportation and Material Moving Occupations (53-0000) | Khan et al., 2020 <sup>127</sup>     | n=57  | Ambulance Drivers and Attendants, Except Emergency Medical Technicians | Cross-sectional survey | 06/15 - 06/29 | India                    | 3.5% (0.9-13.3%) | Moderate |
| Transportation and Material Moving Occupations (53-0000) | Martinez et al., 2020 <sup>121</sup> | n=30  | Heavy and Tractor-Trailer Truck Drivers                                | Cross-sectional survey | 04/16 - 04/17 | United States of America | 16.67%           | High     |
| Transportation and Material Moving Occupations (53-0000) | Siddiqui et al., 2020 <sup>2</sup>   | n=9   | Heavy and Tractor-Trailer Truck Drivers                                | Prospective cohort     | 04/15 - 08/15 | India                    | 11.1%            | High     |

|                                        |                                                          |                                     |        |                                                        |                        |               |                            |                    |          |
|----------------------------------------|----------------------------------------------------------|-------------------------------------|--------|--------------------------------------------------------|------------------------|---------------|----------------------------|--------------------|----------|
| 1<br>2<br>3<br>4<br>5<br>6<br>7        | Transportation and Material Moving Occupations (53-0000) | Halatoko et al., 2020 <sup>41</sup> | n=122  | Taxi Drivers and Chauffeurs                            | Cross-sectional survey | 04/23 - 05/08 | Togo                       | 0.8%               | High     |
| 8<br>9<br>10<br>11                     | Transportation and Material Moving Occupations (53-0000) | Poustchi et al., 2020 <sup>28</sup> | n=718  | Taxi Drivers and Chauffeurs                            | Cross-sectional survey | 04/17 - 06/02 | Iran (Islamic Republic of) | 14.1% (11.4-16.9%) | Moderate |
| 12<br>13<br>14<br>15                   | Transportation and Material Moving Occupations (53-0000) | Alemu et al., 2020 <sup>6</sup>     | n=8    | Parking Lot Attendants                                 | Cross-sectional survey | 04/23 - 04/28 | Ethiopia                   | 12.5%              | Moderate |
| 16<br>17<br>18<br>19                   | Transportation and Material Moving Occupations (53-0000) | Alemu et al., 2020 <sup>6</sup>     | n=110  | Laborers and Freight, Stock, and Material Movers, Hand | Cross-sectional survey | 04/23 - 04/28 | Ethiopia                   | 10%                | Moderate |
| 20<br>21<br>22<br>23                   | Transportation and Material Moving Occupations (53-0000) | Khan et al., 2020 <sup>45</sup>     | n=97   | Laborers and Freight, Stock, and Material Movers, Hand | Cross-sectional survey | 07/01 - 07/15 | India                      | 2.1% (0.5-7.9%)    | Moderate |
| 24<br>25<br>26<br>27<br>28             | Transportation and Material Moving Occupations (53-0000) | Satpati et al., 2020 <sup>27</sup>  | n=63   | Laborers and Freight, Stock, and Material Movers, Hand | Cross-sectional survey | 07/26 - 08/08 | India                      | 12.7%              | Moderate |
| 29<br>30<br>31<br>32                   | Not employed (mixed)*                                    | Carrat et al., 2020 <sup>4</sup>    | n=6295 | Unemployed                                             | Prospective cohort     | 05/04 - 06/23 | France                     | 4.9% (4.1-5.6%)    | Moderate |
| 33<br>34<br>35<br>36<br>37             | Not employed (mixed)*                                    | Carrat et al., 2020 <sup>4</sup>    | n=1457 | Unemployed                                             | Prospective cohort     | 05/04 - 06/23 | France                     | 8.3% (6.4-10%)     | Moderate |
| 38<br>39<br>40<br>41<br>42<br>43<br>44 | Not employed (mixed)*                                    | Carrat et al., 2020 <sup>4</sup>    | n=306  | Unemployed                                             | Prospective cohort     | 05/04 - 06/23 | France                     | 7.2% (2.3-11.1%)   | Moderate |
| 45<br>46<br>47                         | Not employed (mixed)*                                    | Carrat et al., 2020 <sup>4</sup>    | n=125  | Unemployed                                             | Prospective cohort     | 05/04 - 06/23 | France                     | 3.8% (0.5-6.3%)    | Moderate |
|                                        | Not employed (mixed)*                                    | Carrat et al., 2020 <sup>4</sup>    | n=402  | Unemployed                                             | Prospective cohort     | 05/04 - 06/23 | France                     | 7.8% (4.7-10.4%)   | Moderate |

|                       |                                        |         |            |                        |               |                          |                    |          |
|-----------------------|----------------------------------------|---------|------------|------------------------|---------------|--------------------------|--------------------|----------|
| Not employed (mixed)* | Chamie et al., 2020 <sup>194</sup>     | n=230   | Unemployed | Cross-sectional survey | 04/25 - 04/28 | United States of America | 4.3%               | Moderate |
| Not employed (mixed)* | McLaughlin et al., 2020 <sup>195</sup> | n=241   | Unemployed | Cross-sectional survey | 05/04 - 05/19 | United States of America | 19.3% (14.6-24.5%) | Moderate |
| Not employed (mixed)* | Merkely et al., 2020 <sup>1</sup>      | n=1095  | Unemployed | Cross-sectional survey | 05/01 - 05/16 | Hungary                  | 0.43% (0.16-0.84%) | Moderate |
| Not employed (mixed)* | Munoz et al., 2020 <sup>196</sup>      | n=905   | Unemployed | Cross-sectional survey | 07/15 - 07/16 | Argentina                | 20%                | Moderate |
| Not employed (mixed)* | Richard et al., 2020 <sup>5</sup>      | n=549   | Unemployed | Cross-sectional survey | 04/06 - 06/30 | Switzerland              | 6%                 | Low      |
| Not employed (mixed)* | Satpati et al., 2020 <sup>27</sup>     | n=47    | Unemployed | Cross-sectional survey | 07/26 - 08/08 | India                    | 2.13%              | Moderate |
| Not employed (mixed)* | Ward et al., 2020 <sup>113</sup>       | n=59369 | Unemployed | Cross-sectional survey | 09/15 - 09/28 | The United Kingdom       | 3.35%              | Moderate |

1. Merkely B, Szabó AJ, Kosztin A, et al. Novel coronavirus epidemic in the Hungarian population, a cross-sectional nationwide survey to support the exit policy in Hungary. *GeroScience*. 2020;42(4):1063-1074. doi:[10.1007/s11357-020-00226-9](https://doi.org/10.1007/s11357-020-00226-9)
2. Siddiqui S, Naushin S, Pradhan S, et al. SARS-CoV-2 antibody seroprevalence and stability in a tertiary care hospital-setting. *medRxiv*. Published online September 2020. doi:[10.1101/2020.09.02.20186486](https://doi.org/10.1101/2020.09.02.20186486)
3. Biggs HM, Harris JB, Breakwell L, et al. Estimated Community Seroprevalence of SARS-CoV-2 Antibodies Two Georgia Counties, April 28-May 3, 2020. *MMWR Morbidity and Mortality Weekly Report*. 2020;69(29):965-970. doi:[10.15585/mmwr.mm6929e2](https://doi.org/10.15585/mmwr.mm6929e2)
4. Carrat F, Lamballerie X de, Rahib D, et al. Seroprevalence of SARS-CoV-2 among adults in three regions of France following the lockdown and associated risk factors: A multicohort study. *medRxiv*. Published online September 2020:2020.09.16.20195693. doi:[10.1101/2020.09.16.20195693](https://doi.org/10.1101/2020.09.16.20195693)
5. Richard A, Wisniak A, Perez-Saez J, et al. Seroprevalence of anti-SARS-CoV-2 IgG antibodies, risk factors for infection and associated symptoms in Geneva, Switzerland: A population-based study. *medRxiv*. Published online December 2020. doi:[10.1101/2020.12.16.20248180](https://doi.org/10.1101/2020.12.16.20248180)
6. Alemu BN, Addissie A, Mamo G, et al. *Sero-Prevalence of Anti-SARS-CoV-2 Antibodies in Addis Ababa, Ethiopia*. *Microbiology*; 2020. doi:[10.1101/2020.10.13.337287](https://doi.org/10.1101/2020.10.13.337287)
7. Brehm T, Schwinge D, Lampalzer S, et al. Seroprevalence of SARS-CoV-2 antibodies among hospital workers in a German tertiary care center: A sequential follow-up study. *International Journal of Hygiene and Environmental Health*. 2021;232:113671. doi:[10.1016/j.ijheh.2020.113671](https://doi.org/10.1016/j.ijheh.2020.113671)
8. Iversen K, Bundgaard H, Hasselbalch RB, et al. Risk of COVID-19 in health-care workers in Denmark: An observational cohort study. *The Lancet Infectious diseases*. Published online August 2020. doi:[10.1016/S1473-3099\(20\)30589-2](https://doi.org/10.1016/S1473-3099(20)30589-2)

- 1  
2  
3 9. Lumley SF, O'Donnell D, Stoesser NE, et al. Antibody Status and Incidence of SARS-CoV-2 Infection in Health Care Workers. *New England Journal of Medicine*.  
4 Published online December 2020:NEJMoa2034545. doi:[10.1056/NEJMoa2034545](https://doi.org/10.1056/NEJMoa2034545)  
5
- 6 10. Shakiba M, Nazemipour M, Salari A, et al. Seroprevalence of SARS-CoV-2 in Guilan Province, Iran, April 2020. *Emerging Infectious Disease journal*. 2021;27(2).  
7 doi:[10.3201/eid2702.201960](https://doi.org/10.3201/eid2702.201960)
- 8  
9 11. Tilley K, Ayvazyan V, Martinez L, et al. A Cross-Sectional Study Examining the Seroprevalence of Severe Acute Respiratory Syndrome Coronavirus 2 Antibodies in  
10 a University Student Population. *Journal of Adolescent Health*. 2020;67(6):763-768. doi:[10.1016/j.jadohealth.2020.09.001](https://doi.org/10.1016/j.jadohealth.2020.09.001)
- 11  
12 12. Tsitsilonis OE, Paraskevis D, Lianidou E, et al. Seroprevalence of Antibodies against SARS-CoV-2 among the Personnel and Students of the National and  
13 Kapodistrian University of Athens, Greece: A Preliminary Report. *Life*. 2020;10(9):214. doi:[10.3390/life10090214](https://doi.org/10.3390/life10090214)
- 14  
15 13. Paulo Arnaldo. *Inquérito Sero-Epidemiológico de SARS-CoV-2 Na Cidade de Pemba (InCOVID 2020)*. República de Moçambique Ministério da Saúde; 2020.
- 16  
17 14. Paulo Arnaldo. *Inquérito Sero-Epidemiológico de SARS-CoV-2 Nas Cidades de Xai-Xai E Chókwè (InCOVID 2020)*. República de Moçambique Ministério da Saúde;  
18 2020.
- 19  
20 15. Nedio Mabunda. *Inquérito Sero-Epidemiológico de SARS-CoV-2 Na Cidade de Beira (InCOVID 2020)*. República de Moçambique Ministério da Saúde; 2020.
- 21  
22 16. Mussagy Mahomed. *Inquérito Sero-Epidemiológico de SARS-CoV-2 Na Cidade de Maxixe E Vila de Massinga (InCOVID 2020)*. República de Moçambique  
23 Ministério da Saúde; 2020.
- 24  
25 17. Payne DC, Smith-Jeffcoat SE, Nowak G, et al. SARS-CoV-2 Infections and Serologic Responses from a Sample of U.S. Navy Service Members - USS Theodore  
26 Roosevelt, April 2020. *MMWR Morbidity and mortality weekly report*. 2020;69(23):714-721. doi:[10.15585/mmwr.mm6923e4](https://doi.org/10.15585/mmwr.mm6923e4)
- 27  
28 18. COVID-19 Serology Tests Still Show Low Antibody Rate of 0.07%. *KBS World Radio*.
- 29  
30 19. Favara DM, McAdam K, Cooke A, et al. SARS-CoV-2 antigen and antibody prevalence among UK staff working with cancer patients during the COVID-19  
31 pandemic. *medRxiv*. Published online September 2020:2020.09.18.20197590. doi:[10.1101/2020.09.18.20197590](https://doi.org/10.1101/2020.09.18.20197590)
- 32  
33 20. Galán MI, Velasco M, Casas ML, et al. Hospital-Wide SARS-CoV-2 seroprevalence in health care workers in a Spanish teaching hospital. *Enfermedades Infecciosas y*  
34 *Microbiología Clínica*. Published online December 2020:S0213005X20304183. doi:[10.1016/j.eimc.2020.11.015](https://doi.org/10.1016/j.eimc.2020.11.015)
- 35  
36 21. Hunter BR, Dbeibo L, Weaver CS, et al. Seroprevalence of severe acute respiratory coronavirus virus 2 (SARS-CoV-2) antibodies among healthcare workers with  
37 differing levels of coronavirus disease 2019 (COVID-19) patient exposure. *Infection Control & Hospital Epidemiology*. Published online August 2020:1-2.  
38 doi:[10.1017/ice.2020.390](https://doi.org/10.1017/ice.2020.390)
- 39  
40 22. Leidner R, Frary A, Cramer J, et al. Longitudinal SARS-CoV-2 serosurveillance of over ten thousand health care workers in the Providence Oregon cohort. *medRxiv*.  
41 Published online August 2020:2020.08.16.20176107. doi:[10.1101/2020.08.16.20176107](https://doi.org/10.1101/2020.08.16.20176107)
- 42  
43 23. Martin CA, Patel P, Goss C, et al. Demographic and occupational determinants of anti-SARS-CoV-2 IgG seropositivity in hospital staff. *Journal of Public Health*.  
44 2020;(fdaa199). doi:[10.1093/pubmed/fdaa199](https://doi.org/10.1093/pubmed/fdaa199)  
45  
46  
47

- 1  
2  
3 24. Baracco A, Perotti G, Filippin A, et al. *SARS-CoV-2 Antibody Prevalence in Health Care Workers of Lodi Hospital, the COVID-19 Italian Epicentre*. Social Science  
4 Research Network; 2020.  
5  
6 25. Goenka M, Afzalpurkar S, Goenka U, et al. Seroprevalence of COVID-19 Amongst Health Care Workers in a Tertiary Care Hospital of a Metropolitan City from  
7 India. *The Journal of the Association of Physicians of India*. 2020;68(11):14-19.  
8  
9 26. Goenka MK, Shah BB, Goenka U, et al. COVID-19 prevalence among health-care workers of Gastroenterology department: An audit from a tertiary-care hospital in  
10 India. *JGH Open*. 2021;5(1):56-63. doi:[10.1002/jgh3.12447](https://doi.org/10.1002/jgh3.12447)  
11  
12 27. Satpati P, Sarangi S, Gantait K, et al. *Sero-Surveillance (IgG) of SARS-CoV-2 Among Asymptomatic General Population of Paschim Medinipur, West Bengal, India*.  
13 Infectious Diseases (except HIV/AIDS); 2020. doi:[10.1101/2020.09.12.20193219](https://doi.org/10.1101/2020.09.12.20193219)  
14  
15 28. Poustchi H, Darvishian M, Mohammadi Z, et al. SARS-CoV-2 antibody seroprevalence in the general population and high-risk occupational groups across 18 cities in  
16 Iran: A population-based cross-sectional study. *The Lancet Infectious Diseases*. 2020;0(0). doi:[10.1016/S1473-3099\(20\)30858-6](https://doi.org/10.1016/S1473-3099(20)30858-6)  
17  
18 29. Jones CR, Hamilton FW, Thompson A, Morris TT, Moran E. SARS-CoV-2 IgG seroprevalence in healthcare workers and other staff at North Bristol NHS Trust: A  
19 sociodemographic analysis. *Journal of Infection*. 2020;0(0). doi:[10.1016/j.jinf.2020.11.036](https://doi.org/10.1016/j.jinf.2020.11.036)  
20  
21 30. Anna F, Goyard S, Lalanne AI, et al. High seroprevalence but short-lived immune response to SARS-CoV-2 infection in Paris. *medRxiv*. Published online November  
22 2020:2020.10.25.20219030. doi:[10.1101/2020.10.25.20219030](https://doi.org/10.1101/2020.10.25.20219030)  
23  
24 31. Erber J, Kappler V, Haller B, et al. Strategies for infection control and prevalence of anti-SARS-CoV-2 IgG in 4,554 employees of a university hospital in Munich,  
25 Germany. Published online October 2020. doi:[10.1101/2020.10.04.20206136](https://doi.org/10.1101/2020.10.04.20206136)  
26  
27 32. Hanrath AT, Loeff IS van der, Lendrem DW, et al. SARS-CoV-2 testing of 11,884 healthcare workers at an acute NHS hospital trust in England: A retrospective  
28 analysis. *medRxiv*. Published online December 2020:2020.12.22.20242362. doi:[10.1101/2020.12.22.20242362](https://doi.org/10.1101/2020.12.22.20242362)  
29  
30 33. Rosser JI, Röltgen K, Dymock M, et al. Severe acute respiratory coronavirus virus 2 (SARS-CoV-2) seroprevalence in healthcare personnel in northern California  
31 early in the coronavirus disease 2019 (COVID-19) pandemic. *Infection Control & Hospital Epidemiology*. Published online December 2020:1-7.  
32 doi:[10.1017/ice.2020.1358](https://doi.org/10.1017/ice.2020.1358)  
33  
34 34. Silva VO, de Oliveira EL, Castejon MJ, et al. Prevalence of antibodies against sars-cov-2 in professionals of a public health laboratory at são paulo, sp, brazil.  
35 *medRxiv*. Published online October 2020. doi:[10.1101/2020.10.19.20213421](https://doi.org/10.1101/2020.10.19.20213421)  
36  
37 35. Sabourin KR, Schultz J, Romero J, et al. Risk Factors of SARS-CoV-2 Antibodies in Arapahoe County First Responders - the COVID-19 Arapahoe SErosurveillance  
38 Study (CASES) Project. *Journal of Occupational and Environmental Medicine*. Published online December 2020. doi:[10.1097/JOM.0000000000002099](https://doi.org/10.1097/JOM.0000000000002099)  
39  
40 36. Yogo N, Greenwood KL, Thompson L, et al. Point prevalence survey to evaluate the seropositivity for coronavirus disease 2019 (COVID-19) among high-risk  
41 healthcare workers. *Infection Control and Hospital Epidemiology*. Published online December 2020:1-6. doi:[10.1017/ice.2020.1370](https://doi.org/10.1017/ice.2020.1370)  
42  
43 37. Figueiredo-Campos P, Blankenhaus B, Mota C, et al. Seroprevalence of anti-SARS-CoV-2 antibodies in COVID-19 patients and healthy volunteers up to 6 months  
44 post disease onset. *European Journal of Immunology*. 2020;50(12):2025-2040. doi:[10.1002/eji.202048970](https://doi.org/10.1002/eji.202048970)  
45  
46  
47



- 1  
2  
3 38. Gonçalves J, Sousa RL, Jacinto MJ, et al. Evaluating SARS-CoV-2 Seroconversion Following Relieve of Confinement Measures. *Frontiers in Medicine*. 2020;7.  
4 doi:[10.3389/fmed.2020.603996](https://doi.org/10.3389/fmed.2020.603996)  
5
- 6 39. Fontanet A, Grant R, Tondeur L, et al. SARS-CoV-2 infection in primary schools in northern France: A retrospective cohort study in an area of high transmission.  
7 *medRxiv*. Published online June 2020:2020.06.25.20140178. doi:[10.1101/2020.06.25.20140178](https://doi.org/10.1101/2020.06.25.20140178)  
8
- 9 40. Torres JP, Piñera C, De La Maza V, et al. Severe Acute Respiratory Syndrome Coronavirus 2 Antibody Prevalence in Blood in a Large School Community Subject to  
10 a Coronavirus Disease 2019 Outbreak: A Cross-sectional Study. *Clinical Infectious Diseases*. Published online July 2020:ciaa955. doi:[10.1093/cid/ciaa955](https://doi.org/10.1093/cid/ciaa955)  
11
- 12 41. Halatoko WA, KONU YR, Gbeasor-Komlanvi FA, et al. Prevalence of SARS-CoV-2 among high-risk populations in Lom&Eacute; (Togo) in 2020. *medRxiv*.  
13 Published online August 2020:2020.08.07.20163840. doi:[10.1101/2020.08.07.20163840](https://doi.org/10.1101/2020.08.07.20163840)  
14
- 15 42. Slusser S. MLB antibody study: 0.7% of those tested had been exposed to coronavirus. *San Francisco Chronicle*. Published online May 2020.  
16
- 17 43. Vince A, Zadro R, Šostar Z, et al. SARS-CoV-2 Seroprevalence in a Cohort of Asymptomatic, RT-PCR Negative Croatian First League Football Players. *medRxiv*.  
18 Published online November 2020:2020.10.30.20223230. doi:[10.1101/2020.10.30.20223230](https://doi.org/10.1101/2020.10.30.20223230)  
19
- 20 44. Mack D, Gärtner BC, Rössler A, et al. Prevalence of SARS-CoV-2 IgG antibodies in a large prospective cohort study of elite football players in Germany (May/June  
21 2020): Implications for a testing protocol in asymptomatic individuals and estimation of the rate of undetected cases. *Clinical Microbiology and Infection*.  
22 2020;27(3):473.e1-473.e4. doi:[10.1016/j.cmi.2020.11.033](https://doi.org/10.1016/j.cmi.2020.11.033)  
23
- 24 45. Khan SMS, Qurieshi MA, Haq I, et al. Seroprevalence of SARS-CoV-2 specific IgG antibodies in District Srinagar, northern India A cross-sectional study. *PLOS*  
25 *ONE*. 2020;15(11):e0239303. doi:[10.1371/journal.pone.0239303](https://doi.org/10.1371/journal.pone.0239303)  
26
- 27 46. Akinbami LJ, Vuong N, Petersen LR, et al. SARS-CoV-2 Seroprevalence among Healthcare, First Response, and Public Safety Personnel, Detroit Metropolitan Area,  
28 Michigan, USA, May/June 2020 - Volume 26, Number 12/December 2020 - Emerging Infectious Diseases journal - CDC. Published online December 2020.  
29 doi:[10.3201/eid2612.203764](https://doi.org/10.3201/eid2612.203764)  
30
- 31 47. Amendola A, Tanzi E, Folgori L, et al. Low seroprevalence of SARS-CoV-2 infection among healthcare workers of the largest children hospital in Milan during the  
32 pandemic wave. *Infection Control & Hospital Epidemiology*. Published online August 2020:1-2. doi:[10.1017/ice.2020.401](https://doi.org/10.1017/ice.2020.401)  
33
- 34 48. Paulo Arnaldo. *Inquérito Sero-Epidemiológico de SARS-CoV-2 Na Cidade de Quelimane (InCOVID 2020)*. República de Moçambique Ministério da Saúde; 2020.  
35
- 36 49. Bal A, Brengel-Pesce K, Gaymard A, et al. Clinical and microbiological assessments of COVID-19 in healthcare workers: A prospective longitudinal study. *medRxiv*.  
37 Published online November 2020:2020.11.04.20225862. doi:[10.1101/2020.11.04.20225862](https://doi.org/10.1101/2020.11.04.20225862)  
38
- 39 50. Fernández-Rivas G, Quirant-Sánchez B, González V, et al. Seroprevalence of SARS-CoV-2 IgG Specific Antibodies among Healthcare Workers in the Northern  
40 Metropolitan Area of Barcelona, Spain, after the first pandemic wave. *medRxiv*. Published online June 2020:2020.06.24.20135673. doi:[10.1101/2020.06.24.20135673](https://doi.org/10.1101/2020.06.24.20135673)  
41
- 42 51. Bardai G, Ouellet J, Engelhardt T, Bertolizio G, Wu Z, Rauch F. Prevalence of SARS-CoV-2 infections in a pediatric orthopedic hospital. von Ungern-Sternberg B,  
43 ed. *Pediatric Anesthesia*. 2021;31(2):247-248. doi:[10.1111/pan.14047](https://doi.org/10.1111/pan.14047)  
44  
45  
46  
47

- 1  
2  
3 52. Blairon L, Mokrane S, Wilmet A, et al. Large-scale, molecular and serological SARS-CoV-2 screening of healthcare workers in a 4-site public hospital in Belgium  
4 after COVID-19 outbreak. *Journal of Infection*. Published online July 2020:S0163445320305144. doi:[10.1016/j.jinf.2020.07.033](https://doi.org/10.1016/j.jinf.2020.07.033)  
5
- 6 53. Moreno Borraz LA, Giménez López M, Carrera Lasfuentes P, et al. Prevalencia de infección por coronavirus SARS-CoV-2 en pacientes y profesionales de un hospital  
7 de media y larga estancia en España. *Revista Española de Geriatria y Gerontología*. 2020;56(2):75-80. doi:[10.1016/j.regg.2020.10.005](https://doi.org/10.1016/j.regg.2020.10.005)  
8
- 9 54. Brunner WM, Hirabayashi L, Krupa NL, et al. Severe acute respiratory coronavirus virus 2 (SARS-CoV-2) IgG results among healthcare workers in a rural upstate  
10 New York hospital system. *Infection Control & Hospital Epidemiology*. Published online October 2020:1-4. doi:[10.1017/ice.2020.1296](https://doi.org/10.1017/ice.2020.1296)  
11
- 12 55. Carozzi FM, Cusi MG, Pistello M, et al. Detection of asymptomatic SARS-CoV-2 infections among healthcare workers: Results from a large-scale screening program  
13 based on rapid serological testing. *medRxiv*. Published online August 2020. doi:[10.1101/2020.07.30.20149567](https://doi.org/10.1101/2020.07.30.20149567)  
14
- 15 56. Vilibic-Cavlek T, Stevanovic V, Tabain I, et al. Severe acute respiratory syndrome coronavirus 2 seroprevalence among personnel in the healthcare facilities of  
16 Croatia, 2020. *Revista da Sociedade Brasileira de Medicina Tropical*. 2020;53. doi:[10.1590/0037-8682-0458-2020](https://doi.org/10.1590/0037-8682-0458-2020)  
17
- 18 57. Chibwana MG, Jere KC, kamng'ona R, et al. High SARS-CoV-2 seroprevalence in Health Care Workers but relatively low numbers of deaths in urban Malawi.  
19 *medRxiv*. Published online August 2020:2020.07.30.20164970. doi:[10.1101/2020.07.30.20164970](https://doi.org/10.1101/2020.07.30.20164970)  
20
- 21 58. Coffman B. New Co-Immunity Project data show COVID-19 infection among health care workers may be lower than the general population | UofL News. *UofLNews*.  
22 Published online August 2020.  
23
- 24 59. Cooper DJ, Lear S, Watson L, et al. A prospective study of risk factors associated with seroprevalence of SARS-CoV-2 antibodies in healthcare workers at a large UK  
25 teaching hospital. *medRxiv*. Published online November 2020:2020.11.03.20220699. doi:[10.1101/2020.11.03.20220699](https://doi.org/10.1101/2020.11.03.20220699)  
26
- 27 60. Denyer S. Japanese firm's blanket testing of employees could serve as model. *LMT Online*. Published online June 2020.  
28
- 29 61. Dimeglio C, Herin F, Miedougé M, et al. Screening for SARS-CoV-2 antibodies among healthcare workers in a university hospital in southern France. *Journal of*  
30 *Infection*. 2020;0(0). doi:[10.1016/j.jinf.2020.09.035](https://doi.org/10.1016/j.jinf.2020.09.035)  
31
- 32 62. Fuereder T, Berghoff AS, Heller G, et al. SARS-CoV-2 seroprevalence in oncology healthcare professionals and patients with cancer at a tertiary care centre during  
33 the COVID-19 pandemic. *ESMO Open*. 2020;5(5). doi:[10.1136/esmoopen-2020-000889](https://doi.org/10.1136/esmoopen-2020-000889)  
34
- 35 63. Fusco FM, Pisaturo M, Iodice V, et al. COVID-19 among healthcare workers in a specialist infectious diseases setting in Naples, Southern Italy: Results of a cross-  
36 sectional surveillance study. *Journal of Hospital Infection*. 2020;105(4):596-600. doi:[10.1016/j.jhin.2020.06.021](https://doi.org/10.1016/j.jhin.2020.06.021)  
37
- 38 64. Geraci L. Antibody tests show just 2% exposure rate to COVID-19. *The Lancaster News*. Published online May 2020.  
39
- 40 65. Eduardo Samo Gudo. *Inquérito Sero-epidemiológico de SARS-CoV-2 na Cidade de Nampula*. República de Moçambique Ministério da Saúde; 2020:19.  
41
- 42 66. Hackner K, Errhalt P, Willheim M, et al. Diagnostic accuracy of two commercially available rapid assays for detection of IgG and IgM antibodies to SARS-CoV-2  
43 compared to ELISA in a low-prevalence population. *Research Square*. Published online August 2020. doi:[10.21203/rs.3.rs-50887/v1](https://doi.org/10.21203/rs.3.rs-50887/v1)  
44  
45  
46  
47



- 1  
2  
3 67. Haq M, Rehman A, Noor M, et al. Seroprevalence and Risk Factors of SARS CoV-2 in Health Care Workers of Tertiary-Care Hospitals in the Province of Khyber  
4 Pakhtunkhwa, Pakistan. *medRxiv*. Published online September 2020:2020.09.29.20203125. doi:[10.1101/2020.09.29.20203125](https://doi.org/10.1101/2020.09.29.20203125)  
5
- 6 68. He L, Zeng Y, Zeng C, et al. Positive Rate of Serology and RT-PCR for COVID-19 among healthcare workers during different periods in Wuhan, China. *Journal of*  
7 *Infection*. Published online August 2020. doi:[10.1016/j.jinf.2020.08.027](https://doi.org/10.1016/j.jinf.2020.08.027)  
8
- 9 69. Herzberg J, Vollmer T, Fischer B, et al. Prospective Sero-epidemiological Evaluation of SARS-CoV-2 among Health Care Workers in a German Secondary Care  
10 Hospital. *International Journal of Infectious Diseases*. 2021;102:136-143. doi:[10.1016/j.ijid.2020.10.026](https://doi.org/10.1016/j.ijid.2020.10.026)  
11
- 12 70. Jeremias A, Nguyen J, Levine J, et al. Prevalence of SARS-CoV-2 Infection Among Health Care Workers in a Tertiary Community Hospital. *JAMA Internal*  
13 *Medicine*. Published online August 2020. doi:[10.1001/jamainternmed.2020.4214](https://doi.org/10.1001/jamainternmed.2020.4214)  
14
- 15 71. Jespersen S, Mikkelsen S, Greve T, et al. Severe Acute Respiratory Syndrome Coronavirus 2 Seroprevalence Survey Among 17 971 Healthcare and Administrative  
16 Personnel at Hospitals, Prehospital Services, and Specialist Practitioners in the Central Denmark Region. *Clinical Infectious Diseases*. Published online October  
17 2020:ciaa1471. doi:[10.1093/cid/ciaa1471](https://doi.org/10.1093/cid/ciaa1471)  
18
- 19 72. Kassem AM, Talaat H, Shawky S, et al. SARS-CoV-2 infection among healthcare workers of a gastroenterological service in a tertiary care facility. *Arab Journal of*  
20 *Gastroenterology*. 2020;21(3):151-155. doi:[10.1016/j.ajg.2020.07.005](https://doi.org/10.1016/j.ajg.2020.07.005)  
21
- 22 73. Kern PM, Müller H-H, Menzel T, Weisser H. Studie zur Immunität gegen SARS-CoV-2: Keine signifikante humorale Immunität gegen SARS-CoV-2 im  
23 medizinischen Personal eines Klinikums der Maximalversorgung und in der Stadtregion Fulda. *Der Klinikarzt*. 2020;49(06):268-273. doi:[10.1055/a-1198-1243](https://doi.org/10.1055/a-1198-1243)  
24
- 25 74. Khalil A, Hill R, Wright A, Ladhani S, O'Brien P. SARS-CoV-2-Specific Antibody Detection in Healthcare Workers in a UK Maternity Hospital: Correlation With  
26 SARS-CoV-2 RT-PCR Results. *Clinical Infectious Diseases*. 2020;(ciaa893). doi:[10.1093/cid/ciaa893](https://doi.org/10.1093/cid/ciaa893)  
27
- 28 75. Kumar A, Sathyapalan D, Ramachandran A, Subhash K, Biswas L, Beena KV. SARS-CoV-2 antibodies in healthcare workers in a large university hospital, Kerala,  
29 India. *Clinical Microbiology and Infection*. 2021;27(3):481-483. doi:[10.1016/j.cmi.2020.09.013](https://doi.org/10.1016/j.cmi.2020.09.013)  
30
- 31 76. Lackermair K, William F, Grzanna N, et al. Infection with SARS-CoV-2 in primary care health care workers assessed by antibody testing. *Family Practice*. Published  
32 online August 2020:cmaa078. doi:[10.1093/fampra/cmaa078](https://doi.org/10.1093/fampra/cmaa078)  
33
- 34 77. Lahner E, Dilaghi E, Prestigiacomo C, et al. Prevalence of Sars-Cov-2 Infection in Health Workers (HWs) and Diagnostic Test Performance: The Experience of a  
35 Teaching Hospital in Central Italy. *International Journal of Environmental Research and Public Health*. 2020;17(12). doi:[10.3390/ijerph17124417](https://doi.org/10.3390/ijerph17124417)  
36
- 37 78. Liu M, Cheng S-Z, Xu K-W, et al. Use of personal protective equipment against coronavirus disease 2019 by healthcare professionals in Wuhan, China: Cross  
38 sectional study. *BMJ*. 2020;369. doi:[10.1136/bmj.m2195](https://doi.org/10.1136/bmj.m2195)  
39
- 40 79. Liu T, Wu S, Tao H, Zeng G, Zhou F, Wang X. Prevalence of IgG Antibodies to SARS-CoV-2 in Wuhan Implications for the Longevity of Antibodies Against  
41 SARS-CoV-2. *Research Square*. Published online November 2020. doi:[10.21203/rs.3.rs-99748/v1](https://doi.org/10.21203/rs.3.rs-99748/v1)  
42
- 43 80. Lorenzo D, Carrisi C. COVID-19 exposure risk for family members of healthcare workers: An observational study. *International Journal of Infectious Diseases*.  
44 2020;98:287-289. doi:[10.1016/j.ijid.2020.06.106](https://doi.org/10.1016/j.ijid.2020.06.106)  
45  
46  
47

- 1  
2  
3 81. Mussagy Mahomed. *Inquérito Sero-Epidemiológico de SARS-CoV-2 Na Cidade de Tete (InCOVID 2020)*. República de Moçambique Ministério da Saúde; 2020.
- 4  
5 82. Arlete Mahumane. *Inquérito Sero-Epidemiológico de SARS-CoV-2 Na Cidade de Chimoio (InCOVID 2020)*. República de Moçambique Ministério da Saúde; 2020.
- 6  
7 83. Majdoubi A, Michalski C, O'Connell SE, et al. Antibody reactivity to SARS-CoV-2 is common in unexposed adults and infants under 6 months. *medRxiv*. Published  
8 online November 2020:2020.10.05.20206664. doi:[10.1101/2020.10.05.20206664](https://doi.org/10.1101/2020.10.05.20206664)
- 9  
10 84. Majiya H, Aliyu-Paiko M, Balogu VT, et al. Seroprevalence of COVID-19 in Niger State. *medRxiv*. Published online August 2020. doi:[10.1101/2020.08.04.20168112](https://doi.org/10.1101/2020.08.04.20168112)
- 11  
12 85. Fill Malfertheiner S, Brandstetter S, Roth S, et al. Immune response to SARS-CoV-2 in health care workers following a COVID-19 outbreak: A prospective  
13 longitudinal study. *Journal of Clinical Virology*. 2020;130:104575. doi:[10.1016/j.jcv.2020.104575](https://doi.org/10.1016/j.jcv.2020.104575)
- 14  
15 86. Martin C, Montesinos I, Dauby N, et al. Dynamics of SARS-CoV-2 RT-PCR positivity and seroprevalence among high-risk healthcare workers and hospital staff.  
16 *Journal of Hospital Infection*. 2020;106(1):102-106. doi:[10.1016/j.jhin.2020.06.028](https://doi.org/10.1016/j.jhin.2020.06.028)
- 17  
18 87. de Melo MS, Borges LP, de Souza DRV, et al. *Anti-SARS-CoV-2 IgM and IgG Antibodies in Health Workers in Sergipe, Brazil*. *Infectious Diseases (except  
19 HIV/AIDS)*; 2020. doi:[10.1101/2020.09.24.20200873](https://doi.org/10.1101/2020.09.24.20200873)
- 20  
21 88. Morcuende M, Guglielminotti J, Landau R. Anesthesiologists' and Intensive Care Providers' Exposure to COVID-19 Infection in a New York City Academic Center:  
22 A Prospective Cohort Study Assessing Symptoms and COVID-19 Antibody Testing. *Anesthesia and analgesia*. 2020;131(3):669-676.  
doi:[10.1213/ANE.0000000000005056](https://doi.org/10.1213/ANE.0000000000005056)
- 23  
24 89. Moscola J, Sembajwe G, Jarrett M, et al. Prevalence of SARS-CoV-2 Antibodies in Health Care Personnel in the New York City Area. *JAMA*. 2020;324(9):893-895.  
25 doi:[10.1001/jama.2020.14765](https://doi.org/10.1001/jama.2020.14765)
- 26  
27 90. Nishida T, Iwahashi H, Yamauchi K, et al. Seroprevalence of SARS-CoV-2 Antibodies Among 925 Staff Members in an Urban Hospital Accepting COVID-19  
28 Patients in Osaka Prefecture, Japan. *medRxiv*. Published online January 2020:2020.09.10.20191866. doi:[10.1101/2020.09.10.20191866](https://doi.org/10.1101/2020.09.10.20191866)
- 29  
30 91. Olalla J, Correa AM, Martín-Escalante MD, et al. Search for asymptomatic carriers of SARS-CoV-2 in healthcare workers during the pandemic: A Spanish  
31 experience. *QJM: An International Journal of Medicine*. 2020;(hcaa238). doi:[10.1093/qjmed/hcaa238](https://doi.org/10.1093/qjmed/hcaa238)
- 32  
33 92. Pallett SJC, Rayment M, Patel A, et al. Point-of-care serological assays for delayed SARS-CoV-2 case identification among health-care workers in the UK: A  
34 prospective multicentre cohort study. *The Lancet Respiratory Medicine*. 2020;8(9):885-894. doi:[10.1016/S2213-2600\(20\)30315-5](https://doi.org/10.1016/S2213-2600(20)30315-5)
- 35  
36 93. Péré H, Wack M, Védie B, et al. Sequential SARS-CoV-2 IgG assays as confirmatory strategy to confirm equivocal results: Hospital-wide antibody screening in 3,569  
37 staff health care workers in Paris. *Journal of Clinical Virology*. 2020;132:104617. doi:[10.1016/j.jcv.2020.104617](https://doi.org/10.1016/j.jcv.2020.104617)
- 38  
39 94. Poulidakos D, Sinha S, Kalra PA. SARS-CoV-2 antibody screening in healthcare workers in a tertiary centre in North West England. *Journal of clinical virology : the  
40 official publication of the Pan American Society for Clinical Virology*. 2020;129:104545-104545. doi:[10.1016/j.jcv.2020.104545](https://doi.org/10.1016/j.jcv.2020.104545)
- 41  
42 95. Psychogiou M, Karabinis A, Pavlopoulou I, et al. Antibodies against SARS-CoV-2 among health care workers in a country with low burden of COVID-19. *medRxiv*.  
43 Published online June 2020. doi:[10.1101/2020.06.23.20137620](https://doi.org/10.1101/2020.06.23.20137620)
- 44  
45  
46  
47

- 1  
2  
3 96. Kolthur-Seetharam U, Shah D, Shastri J, et al. *SARS-CoV2 Serological Survey in Mumbai by NITI-BMC-TIFR: Preliminary Report of Round-2*. NITI-BMC-TIFR; 2020.  
4  
5  
6 97. Shields AM, Faustini SE, Perez-Toledo M, et al. SARS-CoV-2 seroconversion in health care workers. *medRxiv*. Published online May 2020:2020.05.18.20105197.  
7 doi:[10.1101/2020.05.18.20105197](https://doi.org/10.1101/2020.05.18.20105197)  
8  
9 98. Ismael Amaral Silva PA, Ismael C, Marchon da Silva C, Domenge C. 1761P Universal screening of SARS-CoV-2 of oncology healthcare workers a Brazilian  
10 experience. *Annals of Oncology*. 2020;31:S1024. doi:[10.1016/j.annonc.2020.08.1825](https://doi.org/10.1016/j.annonc.2020.08.1825)  
11  
12 99. Solodky ML, Galvez C, Russias B, et al. Lower detection rates of SARS-COV2 antibodies in cancer patients versus health care workers after symptomatic COVID-  
13 19. *Annals of Oncology*. 2020;31(8):1087-1088. doi:[10.1016/j.annonc.2020.04.475](https://doi.org/10.1016/j.annonc.2020.04.475)  
14  
15 100. Soriano V, Meiriño R, Corral O, Guallar MP. Severe Acute Respiratory Syndrome Coronavirus 2 Antibodies in Adults in Madrid, Spain. *Clinical Infectious*  
16 *Diseases*. 2020;(ciaa769). doi:[10.1093/cid/ciaa769](https://doi.org/10.1093/cid/ciaa769)  
17  
18 101. Istituto Nazionale di Statistica. *PRIMI RISULTATI DELL'INDAGINE DI SIEROPREVALENZA SUL SARS-CoV-2*. Istituto Nazionale di Statistica; 2020.  
19  
20 102. Steensels D, Oris E, Coninx L, et al. Hospital-Wide SARS-CoV-2 Antibody Screening in 3056 Staff in a Tertiary Center in Belgium. *JAMA*. 2020;(7501160).  
21 doi:[10.1001/jama.2020.11160](https://doi.org/10.1001/jama.2020.11160)  
22  
23 103. Stock AD, Bader ER, Cezayirli P, et al. COVID-19 Infection Among Healthcare Workers: Serological Findings Supporting Routine Testing. *Frontiers in Medicine*.  
24 2020;7. doi:[10.3389/fmed.2020.00471](https://doi.org/10.3389/fmed.2020.00471)  
25  
26 104. Takita M, Matsumura T, Yamamoto K, et al. Geographical Profiles of COVID-19 Outbreak in Tokyo: An Analysis of the Primary Care ClinicBased Point-of-Care  
27 Antibody Testing. *Journal of Primary Care & Community Health*. 2020;11:215013272094269. doi:[10.1177/2150132720942695](https://doi.org/10.1177/2150132720942695)  
28  
29 105. Tong X, Ning M, Huang R, et al. Surveillance of SARS-CoV-2 infection among frontline health care workers in Wuhan during COVID-19 outbreak. *Immunity,*  
30 *Inflammation and Disease*. 2020;8(4):840-843. doi:[10.1002/iid3.340](https://doi.org/10.1002/iid3.340)  
31  
32 106. Trieu M-C, Bansal A, Madsen A, et al. SARS-CoV-2 Specific Neutralizing Antibody Responses in Norwegian Health Care Workers After the First Wave of COVID-  
33 19 Pandemic: A Prospective Cohort Study. *The Journal of Infectious Diseases*. 2020;2021-(jiaa737). doi:[10.1093/infdis/jiaa737](https://doi.org/10.1093/infdis/jiaa737)  
34  
35 107. Tu D, Shu J, Wu X, et al. Immunological detection of serum antibodies in pediatric medical workers exposed to varying levels of SARS-CoV-2. *The Journal of*  
36 *Infection*. 2021;82(1):159-198. doi:[10.1016/j.jinf.2020.07.023](https://doi.org/10.1016/j.jinf.2020.07.023)  
37  
38 108. Valdivia A, Torres I, Huntley D, et al. Caveats in interpreting SARS-CoV-2 IgM+/IgG- antibody profile in asymptomatic health care workers. *Journal of Medical*  
39 *Virology*. 2020;n/a(n/a). doi:[10.1002/jmv.26400](https://doi.org/10.1002/jmv.26400)  
40  
41 109. Chafloque-Vasquez RA, Pampa-Espinoza L, Salinas JCC. Seroprevalence of COVID-19 in workers in a hospital in the Peruvian Amazon. *ACTA MEDICA*  
42 *PERUANA*. 2020;37(3). doi:[10.35663/amp.2020.373.1050](https://doi.org/10.35663/amp.2020.373.1050)  
43  
44 110. Edna Viegas. *Inquérito Sero-Epidemiológico de SARS-CoV-2 Na Cidade de Maputo (InCOVID 2020)*. República de Moçambique Ministério da Saúde; 2020.  
45  
46  
47

- 1  
2  
3 111. Vlachoyiannopoulos P, Alexopoulos H, Apostolidi I, et al. Anti-SARS-CoV-2 antibody detection in healthcare workers of two tertiary hospitals in Athens, Greece. *Clinical Immunology*. 2020;221:108619. doi:[10.1016/j.clim.2020.108619](https://doi.org/10.1016/j.clim.2020.108619)
- 4  
5  
6 112. Dalla Volta A, Valcamonico F, Pedersini R, et al. The Spread of SARS-CoV-2 Infection Among the Medical Oncology Staff of ASST Spedali Civili of Brescia: Efficacy of Preventive Measures. *Frontiers in Oncology*. 2020;10:1574. doi:[10.3389/fonc.2020.01574](https://doi.org/10.3389/fonc.2020.01574)
- 7  
8  
9 113. Ward H, Cooke G, Atchison C, et al. Declining prevalence of antibody positivity to SARS-CoV-2: A community study of 365,000 adults. *medRxiv*. Published online October 2020:2020.10.26.20219725. doi:[10.1101/2020.10.26.20219725](https://doi.org/10.1101/2020.10.26.20219725)
- 10  
11  
12 114. Xiong S, Guo C, Dittmer U, Zheng X, Wang B. The prevalence of antibodies to SARS-CoV-2 in asymptomatic healthcare workers with intensive exposure to COVID-19. *medRxiv*. Published online June 2020:2020.05.28.20110767. doi:[10.1101/2020.05.28.20110767](https://doi.org/10.1101/2020.05.28.20110767)
- 13  
14  
15 115. Zhang J, Liu J, Li N, et al. Serological detection of 2019-nCoV respond to the epidemic: A useful complement to nucleic acid testing. *medRxiv*. Published online March 2020:2020.03.04.20030916. doi:[10.1101/2020.03.04.20030916](https://doi.org/10.1101/2020.03.04.20030916)
- 16  
17  
18 116. Zhao D, Wang M, Wang M, et al. Asymptomatic infection by SARS-CoV-2 in healthcare workers: A study in a large teaching hospital in Wuhan, China. *International Journal of Infectious Diseases*. 2020;99:219-225. doi:[10.1016/j.ijid.2020.07.082](https://doi.org/10.1016/j.ijid.2020.07.082)
- 19  
20  
21 117. Ahmad K, Rezvanizadeh V, Dahal S, et al. COVID-19 IgG/IgM antibody testing in Los Angeles County, California. *European Journal of Clinical Microbiology & Infectious Diseases*. Published online November 2020. doi:[10.1007/s10096-020-04111-3](https://doi.org/10.1007/s10096-020-04111-3)
- 22  
23  
24 118. Halbrook M, Gadoth A, Martin-Blais R, et al. Incidence of SARS-CoV-2 infection among asymptomatic frontline health workers in Los Angeles County, California. *medRxiv*. Published online November 2020:2020.11.18.20234211. doi:[10.1101/2020.11.18.20234211](https://doi.org/10.1101/2020.11.18.20234211)
- 25  
26  
27 119. Iwuji K, Islam E, Berdine G, Nugent K, Test V, Tijerina A. Prevalence of Coronavirus Antibody Among First Responders in Lubbock, Texas. *Journal of Primary Care & Community Health*. 11:2150132720971390. doi:[10.1177/2150132720971390](https://doi.org/10.1177/2150132720971390)
- 28  
29  
30 120. Parker-Magyar A. Few among Long Hill first responders test positive for COVID-19 antibodies. *Echoes Sentinel*. Published online June 2020.
- 31  
32  
33 121. Caban-Martinez AJ, Schaefer-Solle N, Santiago K, et al. Epidemiology of SARS-CoV-2 antibodies among firefighters/paramedics of a US fire department: A cross-sectional study. *Occupational and Environmental Medicine*. 2020;77(12):857-861. doi:[10.1136/oemed-2020-106676](https://doi.org/10.1136/oemed-2020-106676)
- 34  
35  
36 122. Staletovich J. South Florida Cities Begin Testing Employees For COVID-19 Antibodies. *WLRN*. Published online May 2020.
- 37  
38  
39 123. Hibino M, Iwabuchi S, Munakata H. SARS-CoV-2 IgG seroprevalence among medical staff in a general hospital that treated patients with COVID-19 in Japan: Retrospective evaluation of nosocomial infection control. *Journal of Hospital Infection*. 2020;107:103-104. doi:[10.1016/j.jhin.2020.10.001](https://doi.org/10.1016/j.jhin.2020.10.001)
- 40  
41  
42 124. Calcagno A, Ghisetti V, Emanuele T, et al. Risk for SARS-CoV-2 Infection in Healthcare Workers, Turin, Italy. *Emerging Infectious Diseases*. 2021;27(1):303-305. doi:[10.3201/eid2701.203027](https://doi.org/10.3201/eid2701.203027)
- 43  
44  
45 125. Alharbi SA, Almutairi AZ, Jan AA, Alkhalify AM. Enzyme-Linked Immunosorbent Assay for the Detection of Severe Acute Respiratory Syndrome Coronavirus 2 (SARS-CoV-2) IgM/IgA and IgG Antibodies Among Healthcare Workers. *Cureus*. Published online September 2020. doi:[10.7759/cureus.10285](https://doi.org/10.7759/cureus.10285)
- 46  
47

- 1  
2  
3 126. Chau NVV, Toan LM, Man DNH, et al. Absence of SARS-CoV-2 antibodies in health care workers of a tertiary referral hospital for COVID-19 in southern  
4 Vietnam. *Journal of Infection*. 2020;82(1):e36-e37. doi:[10.1016/j.jinf.2020.11.018](https://doi.org/10.1016/j.jinf.2020.11.018)  
5
- 6 127. Khan MS, Haq I, Qurieshi MA, et al. SARS-CoV-2 seroprevalence in healthcare workers of dedicated-COVID hospitals and nonCOVID hospitals of District  
7 Srinagar, Kashmir. *medRxiv*. Published online October 2020:2020.10.23.20218164. doi:[10.1101/2020.10.23.20218164](https://doi.org/10.1101/2020.10.23.20218164)  
8
- 9 128. Costa SF, Giavina-Bianchi P, Buss L, et al. SARS-CoV-2 seroprevalence and risk factors among oligo/asymptomatic healthcare workers(HCW): Estimating the  
10 impact of community transmission. *Clinical Infectious Diseases*. 2020;(c1aa1845). doi:[10.1093/cid/ciaa1845](https://doi.org/10.1093/cid/ciaa1845)  
11
- 12 129. Mohr N, Harland K, Krishnadasan A, Santibanez S, Talan D. Diagnosed and Undiagnosed COVID-19 in US Emergency Department Health Care Personnel: A  
13 Cross-sectional Analysis. *Annals of Emergency Medicine*. Published online December 2020. doi:[10.1016/j.annemergmed.2020.12.007](https://doi.org/10.1016/j.annemergmed.2020.12.007)  
14
- 15 130. Noor M, Haq M, Ul Haq N, et al. Does Working in a COVID-19 Receiving Health Facility Influence Seroprevalence to SARS-CoV-2? *Cureus*. Published online  
16 November 2020. doi:[10.7759/cureus.11389](https://doi.org/10.7759/cureus.11389)  
17
- 18 131. Singhal T, Shah S, Naik R, Kazi A, Thakkar P. Prevalence of COVID-19 Antibodies in Healthcare Workers at the Peak of the Pandemic in Mumbai, India: A  
19 Preliminary Study. *Indian Journal of Medical Microbiology*. 2020;38(3):461-463. doi:[10.4103/ijmm.IJMM\\_20\\_308](https://doi.org/10.4103/ijmm.IJMM_20_308)  
20
- 21 132. Dacosta-Urbieta A, Rivero-Calle I, Pardo-Seco J, et al. Seroprevalence of SARS-CoV-2 Among Pediatric Healthcare Workers in Spain. *Frontiers in Pediatrics*.  
22 2020;8. doi:[10.3389/fped.2020.00547](https://doi.org/10.3389/fped.2020.00547)  
23
- 24 133. Sartore-Bianchi A, Patelli G, Tosi F, et al. INCIDENCE OF SARS-COV-2 INFECTION IN PATIENTS WITH ACTIVE CANCER: MONO-INSTITUTIONAL  
25 SERIES OF A COMPREHENSIVE CANCER INSTITUTION IN LOMBARDY DURING THE COVID-19 PANDEMIC (NIGUARDA CANCER CENTER, MILANO,  
26 ITALY). In: *Tumori Journal*. Vol 106. AIOM Abstracts.; 2020:1-215. doi:[10.1177/0300891620953388](https://doi.org/10.1177/0300891620953388)  
27
- 28 134. Brousseau N, Morin L, Ouakki M, et al. *COVID-19 : Étude de séroprévalence chez des travailleurs de la santé de centres hospitaliers au Québec*. Institut National  
29 de Sante Publique du Quebec; 2020:20.  
30
- 31 135. Chen Y, Tong X, Wang J, et al. High SARS-CoV-2 antibody prevalence among healthcare workers exposed to COVID-19 patients. *The Journal of Infection*.  
32 2020;81(3):420-426. doi:[10.1016/j.jinf.2020.05.067](https://doi.org/10.1016/j.jinf.2020.05.067)  
33
- 34 136. Favara DM, Cooke A, Doffinger R, McAdam K, Corrie P, Ainsworth NL. COVID-19 Serology in Oncology Staff Study: Understanding SARS-CoV-2 in the  
35 Oncology Workforce. *Clinical Oncology (Royal College of Radiologists (Great Britain))*. 2021;33(1):e61-e63. doi:[10.1016/j.clon.2020.07.015](https://doi.org/10.1016/j.clon.2020.07.015)  
36
- 37 137. Fujita K, Shinpei Kada, Osamu Kanai, et al. Quantitative SARS-CoV-2 antibody screening of healthcare workers in the southern part of Kyoto city during the  
38 COVID-19 peri-pandemic period. *medRxiv*. Published online May 2020.  
39
- 40 138. Godbout EJ, Pryor R, Harmon M, et al. Severe acute respiratory coronavirus virus 2 (SARS-CoV-2) seroprevalence among healthcare workers in a low prevalence  
41 region. *Infection Control & Hospital Epidemiology*. Published online December 2020:1-3. doi:[10.1017/ice.2020.1374](https://doi.org/10.1017/ice.2020.1374)  
42
- 43 139. Houlihan CF, Vora N, Byrne T, et al. Pandemic peak SARS-CoV-2 infection and seroconversion rates in London frontline health-care workers. *The Lancet*.  
44 2020;396(10246):e6-e7. doi:[10.1016/S0140-6736\(20\)31484-7](https://doi.org/10.1016/S0140-6736(20)31484-7)  
45  
46  
47



- 1  
2  
3 140. Insúa C, Stedile G, Figueroa V, et al. Seroprevalence of SARS-CoV-2 antibodies among physicians from a children's hospital. *Archivos Argentinos De Pediatría*.  
4 2020;118(6):381-385. doi:[10.5546/aap.2020.eng.381](https://doi.org/10.5546/aap.2020.eng.381)  
5
- 6 141. Kohler PP, Kahlert CR, Sumer J, et al. Prevalence of SARS-CoV-2 antibodies among Swiss hospital workers: Results of a prospective cohort study. *Infection*  
7 *Control & Hospital Epidemiology*. Published online October 2020:1-5. doi:[10.1017/ice.2020.1244](https://doi.org/10.1017/ice.2020.1244)  
8
- 9 142. Kumar N, Bhartiya S, Singh T. Duration of anti-SARS-CoV-2 antibodies much shorter in India. *Vaccine*. 2021;39(6):886-888. doi:[10.1016/j.vaccine.2020.10.094](https://doi.org/10.1016/j.vaccine.2020.10.094)  
10
- 11 143. Mesnil M, Joubel K, Yavchitz A, Miklaszewski N, Devys J-M. Seroprevalence of SARS-Cov-2 in 646 professionals at the Rothschild Foundation Hospital  
12 (ProSeCoV study). *Anaesthesia Critical Care & Pain Medicine*. 2020;39(5):595-596. doi:[10.1016/j.accpm.2020.08.003](https://doi.org/10.1016/j.accpm.2020.08.003)  
13
- 14 144. Missaglia R, Belingheri M, Antolini L, et al. SARS-CoV-2 pandemia in Lombardy: The impact on family Paediatricians. *Italian Journal of Pediatrics*.  
15 2020;46(1):184. doi:[10.1186/s13052-020-00950-0](https://doi.org/10.1186/s13052-020-00950-0)  
16
- 17 145. Orth-Höller D, Eigentler A, Weseslindtner L, Möst J. Antibody kinetics in primary- and secondary-care physicians with mild to moderate SARS-CoV-2 infection.  
18 *Emerging Microbes & Infections*. 2020;9(1):1692-1694. doi:[10.1080/22221751.2020.1793690](https://doi.org/10.1080/22221751.2020.1793690)  
19
- 20 146. Plebani M, Padoan A, Fedeli U, et al. SARS-CoV-2 serosurvey in health care workers of the Veneto Region. *Clinical Chemistry and Laboratory Medicine (CCLM)*.  
21 2020;58(12):2107-2111. doi:[10.1515/cclm-2020-1236](https://doi.org/10.1515/cclm-2020-1236)  
22
- 23 147. Rudberg A-S, Havervall S, Månberg A, et al. SARS-CoV-2 exposure, symptoms and seroprevalence in healthcare workers in Sweden. *Nature Communications*.  
24 2020;11(1):5064. doi:[10.1038/s41467-020-18848-0](https://doi.org/10.1038/s41467-020-18848-0)  
25
- 26 148. Schmidt SB, Grüter L, Boltzmann M, Rollnik JD. Prevalence of serum IgG antibodies against SARS-CoV-2 among clinic staff. Adrish M, ed. *PLOS ONE*.  
27 2020;15(6):e0235417. doi:[10.1371/journal.pone.0235417](https://doi.org/10.1371/journal.pone.0235417)  
28
- 29 149. Sotgiu G, Barassi A, Miozzo M, et al. SARS-CoV-2 specific serological pattern in healthcare workers of an Italian COVID-19 forefront hospital. *BMC Pulmonary*  
30 *Medicine*. 2020;20(1):203. doi:[10.1186/s12890-020-01237-0](https://doi.org/10.1186/s12890-020-01237-0)  
31
- 32 150. Venugopal U, Jilani N, Rabah S, et al. SARS-CoV-2 seroprevalence among health care workers in a New York City hospital: A cross-sectional analysis during the  
33 COVID-19 pandemic. *International Journal of Infectious Diseases*. 2020;102:63-69. doi:[10.1016/j.ijid.2020.10.036](https://doi.org/10.1016/j.ijid.2020.10.036)  
34
- 35 151. Racine-Brzostek SE, Yang HS, Chadburn A, et al. COVID-19 Viral and Serology Testing in New York City Health Care Workers. *American Journal of Clinical*  
36 *Pathology*. 2020;154(5):592-595. doi:[10.1093/ajcp/aaqaa142](https://doi.org/10.1093/ajcp/aaqaa142)  
37
- 38 152. Hoffmann S, Spallek J, Heinz-Detlef G, Schiebel J, Hufert F. Testing the backbone of the healthcare system: A prospective serological-epidemiological cohort study  
39 of healthcare workers in rural Germany. Published online September 2020. doi:[10.21203/rs.3.rs-84703/v1](https://doi.org/10.21203/rs.3.rs-84703/v1)  
40
- 41 153. Patel MM, Thornburg NJ, Stubblefield WB, et al. Change in Antibodies to SARS-CoV-2 Over 60 Days Among Health Care Personnel in Nashville, Tennessee.  
42 *JAMA*. 2020;324(17):1781. doi:[10.1001/jama.2020.18796](https://doi.org/10.1001/jama.2020.18796)  
43  
44  
45  
46  
47

- 1  
2  
3 154. Self WH, Tenforde MW, Stubblefield WB, et al. Seroprevalence of SARS-CoV-2 Among Frontline Health Care Personnel in a Multistate Hospital Network 13  
4 Academic Medical Centers, April-June 2020. *MMWR Morbidity and Mortality Weekly Report*. 2020;69(35):1221-1226. doi:[10.15585/mmwr.mm6935e2](https://doi.org/10.15585/mmwr.mm6935e2)  
5
- 6 155. Shah VP, Hainy CM, Swift MD, Breeher LE, Theel ES, Sampathkumar P. Unrecognized severe acute respiratory coronavirus virus 2 (SARS-CoV-2) seroprevalence  
7 among healthcare personnel in a low-prevalence area. *Infection Control & Hospital Epidemiology*. Published online November 2020:1-3. doi:[10.1017/ice.2020.1341](https://doi.org/10.1017/ice.2020.1341)  
8
- 9 156. Bampoe S, Lucas DN, Neall G, et al. A cross-sectional study of immune seroconversion to SARS-CoV-2 in front-line maternity health professionals. *medRxiv*.  
10 Published online June 2020. doi:[10.1101/2020.06.24.20139352](https://doi.org/10.1101/2020.06.24.20139352)  
11
- 12 157. Dimcheff DE, Schildhouse RJ, Hausman MS, et al. Seroprevalence of severe acute respiratory syndrome coronavirus-2 (SARS-CoV-2) infection among Veterans  
13 Affairs healthcare system employees suggests higher risk of infection when exposed to SARS-CoV-2 outside the work environment. *Infection Control & Hospital  
14 Epidemiology*.:1-7. doi:[10.1017/ice.2020.1220](https://doi.org/10.1017/ice.2020.1220)  
15
- 16 158. Finkenzeller T, Faltlhauser A, Dietl K-H, et al. SARS-CoV-2-Antikörper bei Intensiv- und Klinikpersonal. *Medizinische Klinik - Intensivmedizin und Notfallmedizin*.  
17 2020;115(3):139-145. doi:[10.1007/s00063-020-00761-5](https://doi.org/10.1007/s00063-020-00761-5)  
18
- 19 159. Grant JJ, Wilmore SMS, McCann NS, et al. Seroprevalence of SARS-CoV-2 antibodies in healthcare workers at a London NHS Trust. *Infection Control & Hospital  
20 Epidemiology*. Published online August 2020:1-3. doi:[10.1017/ice.2020.402](https://doi.org/10.1017/ice.2020.402)  
21
- 22 160. Mansour M, Leven E, Muellers K, Stone K, Mendu DR, Wajnberg A. Prevalence of SARS-CoV-2 Antibodies Among Healthcare Workers at a Tertiary Academic  
23 Hospital in New York City. *Journal of General Internal Medicine*. 2020;35(8):2485-2486. doi:[10.1007/s11606-020-05926-8](https://doi.org/10.1007/s11606-020-05926-8)  
24
- 25 161. Martín V, Fernández-Villa T, Lamuedra Gil de Gomez M, et al. Prevalence of SARS-CoV-2 infection in general practitioners and nurses in primary care and nursing  
26 homes in the Healthcare Area of León and associated factors. *COVID19 en Atención Primaria*. 2020;46:35-39. doi:[10.1016/j.semerg.2020.05.014](https://doi.org/10.1016/j.semerg.2020.05.014)  
27
- 28 162. Meissner EG, Litwin C, Crocker T, Mack E, Card L. 460. Point-of-Care, In-Home SARS-CoV-2 IgG Antibody Testing to Assess Seroprevalence in At-Risk Health  
29 Care Workers. *Open Forum Infectious Diseases*. 2020;7(Supplement\_1):S297-S297. doi:[10.1093/ofid/ofaa439.653](https://doi.org/10.1093/ofid/ofaa439.653)  
30
- 31 163. Mostafa A, Kandil S, El-Sayed MH, et al. Universal COVID-19 screening of 4040 health care workers in a resource-limited setting: An Egyptian pilot model in a  
32 university with 12 public hospitals and medical centers. *International Journal of Epidemiology*. 2020;(dyaa173). doi:[10.1093/ije/dyaa173](https://doi.org/10.1093/ije/dyaa173)  
33
- 34 164. Paradiso AV, Summa simona D, Silvestris N, et al. COVID-19 SCREENING AND MONITORING OF ASYMPTOMATIC HEALTH WORKERS WITH A  
35 RAPID SEROLOGICAL TEST. *medRxiv*. Published online May 2020:2020.05.05.20086017. doi:[10.1101/2020.05.05.20086017](https://doi.org/10.1101/2020.05.05.20086017)  
36
- 37 165. Sydney ER, Kishore P, Laniado I, Rucker LM, Bajaj K, Zinaman MJ. Antibody evidence of SARS-CoV-2 infection in healthcare workers in the Bronx. *Infection  
38 Control & Hospital Epidemiology*. 2020;41(11):1348-1349. doi:[10.1017/ice.2020.437](https://doi.org/10.1017/ice.2020.437)  
39
- 40 166. Zhou F, Li J, Lu M, et al. Tracing asymptomatic SARS-CoV-2 carriers among 3674 hospital staff:A cross-sectional survey. *EClinicalMedicine*. 2020;26.  
41 doi:[10.1016/j.eclinm.2020.100510](https://doi.org/10.1016/j.eclinm.2020.100510)  
42
- 43 167. Buntinx F, Claes P, Gulikers M, et al. Added value of anti-SARS-CoV-2 antibody testing in a Flemish nursing home during an acute COVID-19 outbreak in April  
44 2020. *Acta Clinica Belgica*. 2020;0(0):1-6. doi:[10.1080/17843286.2020.1834285](https://doi.org/10.1080/17843286.2020.1834285)  
45  
46  
47

- 1  
2  
3 168. Reuben J, Sherman A, Ellison JA, et al. SARS-CoV-2 Seroprevalence among First Responders in the District of Columbia, May July 2020. *medRxiv*. Published  
4 online November 2020:2020.11.25.20225490. doi:[10.1101/2020.11.25.20225490](https://doi.org/10.1101/2020.11.25.20225490)  
5
- 6 169. Saberian P, Mireskandari SM, Baratloo A, et al. Antibody Rapid Test Results in Emergency Medical Services Personnel during COVID-19 Pandemic; a Cross  
7 Sectional study. *Archives of Academic Emergency Medicine*. 2020;9(1).
- 8  
9 170. Tarabichi Y, Watts B, Collins T, et al. SARS-CoV-2 Infection among Serially Tested Emergency Medical Services Workers. *Prehospital Emergency Care*.  
10 2020;0(0):1-7. doi:[10.1080/10903127.2020.1831668](https://doi.org/10.1080/10903127.2020.1831668)
- 11  
12 171. Vijh R, Ghafari C, Hayden A, et al. Serological survey following SARS-COV-2 outbreaks at long-term care facilities in metro Vancouver, British Columbia:  
13 Implications for outbreak management and infection control policies. *American Journal of Infection Control*. Published online October 2020.  
14 doi:[10.1016/j.ajic.2020.10.009](https://doi.org/10.1016/j.ajic.2020.10.009)
- 15  
16 172. Bhattacharya D, Winnett A, Fulcher JA, et al. 70. Lack of SARS-CoV-2 Antibody Seroconversion After Prompt Identification and Cohorting of Sentinel sars-cov-2-  
17 positive Residents in a Skilled Nursing Facility. *Open Forum Infectious Diseases*. 2020;7(Supplement\_1):S165-S166. doi:[10.1093/ofid/ofaa439.380](https://doi.org/10.1093/ofid/ofaa439.380)
- 18  
19 173. Pérez-García F, Pérez-Zapata A, Arcos N, et al. Severe acute respiratory coronavirus virus 2 (SARS-CoV-2) infection among hospital workers in a severely affected  
20 institution in Madrid, Spain: A surveillance cross-sectional study. *Infection Control & Hospital Epidemiology*. Published online October 2020:1-7.  
21 doi:[10.1017/ice.2020.1303](https://doi.org/10.1017/ice.2020.1303)
- 22  
23 174. Pérez-García F, Pérez-Zapata A, Arcos N, et al. Severe acute respiratory coronavirus virus 2 (SARS-CoV-2) infection among hospital workers in a severely affected  
24 institution in Madrid, Spain: A surveillance cross-sectional study. *Infection Control & Hospital Epidemiology*. 2021;42(7):803-809. doi:[10.1017/ice.2020.1303](https://doi.org/10.1017/ice.2020.1303)
- 25  
26 175. Mughal MS, Kaur IP, Patton CD, Mikhail NH, Vareechon C, Granet KM. The prevalence of severe acute respiratory coronavirus virus 2 (SARS-CoV-2) IgG  
27 antibodies in intensive care unit (ICU) healthcare personnel (HCP) and its implications a single-center, prospective, pilot study. *Infection Control & Hospital  
28 Epidemiology*. Published online June 2020:1-2. doi:[10.1017/ice.2020.298](https://doi.org/10.1017/ice.2020.298)
- 29  
30 176. Rao S. Covid-19: Jayadeva says its survey hints at herd immunity. *The Times of India*. Published online June 2020.
- 31  
32 177. Shukla V, Lau CSM, Towns M, et al. COVID-19 Exposure Among First Responders in Arizona. *Journal of Occupational and Environmental Medicine*.  
33 2020;62(12).
- 34  
35 178. Gray A. Prevalence Of COVID-19 Antibodies In Washoe Co. Expected To Be Low. *KUNR*. Published online June 2020.
- 36  
37 179. Chughtai O, Batool H, Khan M, Chughtai A. Frequency of COVID-19 IgG Antibodies among Special Police Squad Lahore, Pakistan. *Journal of the College of  
38 Physicians and Surgeons Pakistan*. 2020;30(7):735-739. doi:[10.29271/jcpsp.2020.07.735](https://doi.org/10.29271/jcpsp.2020.07.735)
- 39  
40 180. Gujski M, Jankowski M, Pinkas J, et al. Prevalence of Current and Past SARS-CoV-2 Infections among Police Employees in Poland, JuneJuly 2020. *Journal of  
41 Clinical Medicine*. 2020;9(10):3245. doi:[10.3390/jcm9103245](https://doi.org/10.3390/jcm9103245)
- 42  
43 181. Jerónimo Langa. *Inquérito Sero-Epidemiológico de SARS-CoV-2 Na Cidade de Lichinga (InCOVID 2020)*. República de Moçambique Ministério da Saúde; 2020.
- 44  
45  
46  
47



- 1  
2  
3 182. Ivalda Macicame. *Inquérito Sero-Epidemiológico de SARS-CoV-2 Na Província de Maputo (InCOVID 2020)*. República de Moçambique Ministério da Saúde; 2020.  
4  
5 183. Al-Thani MH, Farag E, Bertollini R, et al. Seroprevalence of SARS-CoV-2 infection in the craft and manual worker population of Qatar. *medRxiv*. Published online  
6 November 2020:2020.11.24.20237719. doi:[10.1101/2020.11.24.20237719](https://doi.org/10.1101/2020.11.24.20237719)  
7  
8 184. Epstude J, Harsch IA. Seroprevalence of COVID-19 antibodies in the cleaning and oncological staff of a municipal clinic. *GMS Hygiene and Infection Control*;  
9 *15:Doc18*. Published online July 2020. doi:[10.3205/DGKH000353](https://doi.org/10.3205/DGKH000353)  
10  
11 185. Hassan SS, Seigerud Å, Mühr LSA, et al. SARS-CoV-2 infections among personnel providing home care services for the elderly in Stockholm, Sweden. *medRxiv*.  
12 Published online December 2020. doi:[10.1101/2020.12.18.20248511](https://doi.org/10.1101/2020.12.18.20248511)  
13  
14 186. Ladhani SN, Jeffery-Smith A, Patel M, et al. High prevalence of SARS-CoV-2 antibodies in care homes affected by COVID-19: Prospective cohort study, England.  
15 *EClinicalMedicine*. 2020;28. doi:[10.1016/j.eclinm.2020.100597](https://doi.org/10.1016/j.eclinm.2020.100597)  
16  
17 187. Lindahl JF, Hoffman T, Esmailzadeh M, et al. High seroprevalence of SARS-CoV-2 in elderly care employees in Sweden. *Infection Ecology & Epidemiology*.  
18 2020;10(1):1789036. doi:[10.1080/20008686.2020.1789036](https://doi.org/10.1080/20008686.2020.1789036)  
19  
20 188. Regan T. Fellowship Village Benefits from Covid-19 Antibody Tests. *Senior Housing News*. Published online June 2020.  
21  
22 189. Alali WQ, Bastaki H, Longenecker JC, et al. Seroprevalence of SARS-CoV-2 in migrant workers in Kuwait. *Journal of Travel Medicine*. 2020;(taaa223).  
23 doi:[10.1093/jtm/taaa223](https://doi.org/10.1093/jtm/taaa223)  
24  
25 190. Addetia A, Crawford KHD, Dingens A, et al. Neutralizing Antibodies Correlate with Protection from SARS-CoV-2 in Humans during a Fishery Vessel Outbreak  
26 with a High Attack Rate. McAdam AJ, ed. *Journal of Clinical Microbiology*. 2020;58(11):e02107-20, /jcm/58/11/JCM.02107-20.atom. doi:[10.1128/JCM.02107-20](https://doi.org/10.1128/JCM.02107-20)  
27  
28 191. Picon RV, Carreno I, da Silva AA, et al. Coronavirus disease 2019 population-based prevalence, risk factors, hospitalization, and fatality rates in southern Brazil.  
29 *International Journal of Infectious Diseases*. 2020;100:402-410. doi:[10.1016/j.ijid.2020.09.028](https://doi.org/10.1016/j.ijid.2020.09.028)  
30  
31 192. D B, L B, P T, Pa P, A B, U L. Effectiveness of the measures aimed at containing Sars-cov-2 virus spreading in work settings: A survey in companies based in the  
32 Veneto region of Italy. *La Medicina del lavoro*. Published online October 2020. doi:[10.23749/mdl.v11i1i5.10037](https://doi.org/10.23749/mdl.v11i1i5.10037)  
33  
34 193. Xu X, Sun J, Nie S, et al. Seroprevalence of immunoglobulin M and G antibodies against SARS-CoV-2 in China. *Nature Medicine*. 2020;26(8):1193-1195.  
35 doi:[10.1038/s41591-020-0949-6](https://doi.org/10.1038/s41591-020-0949-6)  
36  
37 194. Chamie G, Marquez C, Crawford E, et al. Community Transmission of Severe Acute Respiratory Syndrome Coronavirus 2 Disproportionately Affects the Latinx  
38 Population During Shelter-in-Place in San Francisco. *Clinical Infectious Diseases*. Published online August 2020:ciaa1234. doi:[10.1093/cid/ciaa1234](https://doi.org/10.1093/cid/ciaa1234)  
39  
40 195. McLaughlin C, Doll MK, Morrison KT, et al. High Community SARS-CoV-2 Antibody Seroprevalence in a Ski Resort Community, Blaine County, Idaho, US.  
41 Preliminary Results. *medRxiv*. Published online July 2020. doi:[10.1101/2020.07.19.20157198](https://doi.org/10.1101/2020.07.19.20157198)  
42  
43 196. Muñoz L, Pífano M, Bolzán A, et al. *Surveillance and Seroprevalence: Evaluation of IgG Antibodies for SARS-Cov2 by ELISA in the Popular Neighborhood Villa*  
44 *Azul, Quilmes, Province of Buenos Aires, Argentina.*; 2020. doi:[10.1590/SciELOPreprints.1147](https://doi.org/10.1590/SciELOPreprints.1147)  
45  
46  
47

# BMJ Open

## Occupation and SARS-CoV-2 seroprevalence studies: a systematic review

|                                 |                                                                                                                                                                                                                                                                                                                                                                                                                                                                                                                                                                                                                                                                                                                                                                                                                                                                                                                                                                                       |
|---------------------------------|---------------------------------------------------------------------------------------------------------------------------------------------------------------------------------------------------------------------------------------------------------------------------------------------------------------------------------------------------------------------------------------------------------------------------------------------------------------------------------------------------------------------------------------------------------------------------------------------------------------------------------------------------------------------------------------------------------------------------------------------------------------------------------------------------------------------------------------------------------------------------------------------------------------------------------------------------------------------------------------|
| Journal:                        | <i>BMJ Open</i>                                                                                                                                                                                                                                                                                                                                                                                                                                                                                                                                                                                                                                                                                                                                                                                                                                                                                                                                                                       |
| Manuscript ID                   | bmjopen-2022-063771.R2                                                                                                                                                                                                                                                                                                                                                                                                                                                                                                                                                                                                                                                                                                                                                                                                                                                                                                                                                                |
| Article Type:                   | Original research                                                                                                                                                                                                                                                                                                                                                                                                                                                                                                                                                                                                                                                                                                                                                                                                                                                                                                                                                                     |
| Date Submitted by the Author:   | 03-Feb-2023                                                                                                                                                                                                                                                                                                                                                                                                                                                                                                                                                                                                                                                                                                                                                                                                                                                                                                                                                                           |
| Complete List of Authors:       | Boucher, Emily; University of Calgary Cumming School of Medicine, Cao, Christian; University of Calgary, Cumming School of Medicine D'Mello, Sean; University of Waterloo<br>Duarte, Nathan; McGill University, Faculty of Engineering<br>Donnici, Claire; University of Calgary, Cumming School of Medicine<br>Duarte, Natalie; University of Toronto, Faculty of Arts and Science<br>Bennett, Graham; McGill University, Department of Economics Consortium, SeroTracker ; University of Calgary<br>Adishes, Anil; Unity Health Toronto, St. Michael's Hospital; University of Toronto, Division of Occupational Medicine<br>Arora, Rahul; Oxford University, Institute of Biomedical Engineering<br>Kodama, David; Unity Health Toronto, St. Michael's Hospital; University of Toronto Department of Medicine, Division of Emergency Medicine<br>Bobrovitz, Niklas; University of Toronto Temerty Faculty of Medicine; University of Calgary, Department of Critical Care Medicine |
| <b>Primary Subject Heading</b>: | Occupational and environmental medicine                                                                                                                                                                                                                                                                                                                                                                                                                                                                                                                                                                                                                                                                                                                                                                                                                                                                                                                                               |
| Secondary Subject Heading:      | Infectious diseases, Public health                                                                                                                                                                                                                                                                                                                                                                                                                                                                                                                                                                                                                                                                                                                                                                                                                                                                                                                                                    |
| Keywords:                       | COVID-19, Public health < INFECTIOUS DISEASES, OCCUPATIONAL & INDUSTRIAL MEDICINE                                                                                                                                                                                                                                                                                                                                                                                                                                                                                                                                                                                                                                                                                                                                                                                                                                                                                                     |
|                                 |                                                                                                                                                                                                                                                                                                                                                                                                                                                                                                                                                                                                                                                                                                                                                                                                                                                                                                                                                                                       |

SCHOLARONE™  
Manuscripts



I, the Submitting Author has the right to grant and does grant on behalf of all authors of the Work (as defined in the below author licence), an exclusive licence and/or a non-exclusive licence for contributions from authors who are: i) UK Crown employees; ii) where BMJ has agreed a CC-BY licence shall apply, and/or iii) in accordance with the terms applicable for US Federal Government officers or employees acting as part of their official duties; on a worldwide, perpetual, irrevocable, royalty-free basis to BMJ Publishing Group Ltd ("BMJ") its licensees and where the relevant Journal is co-owned by BMJ to the co-owners of the Journal, to publish the Work in this journal and any other BMJ products and to exploit all rights, as set out in our [licence](#).

The Submitting Author accepts and understands that any supply made under these terms is made by BMJ to the Submitting Author unless you are acting as an employee on behalf of your employer or a postgraduate student of an affiliated institution which is paying any applicable article publishing charge ("APC") for Open Access articles. Where the Submitting Author wishes to make the Work available on an Open Access basis (and intends to pay the relevant APC), the terms of reuse of such Open Access shall be governed by a Creative Commons licence – details of these licences and which [Creative Commons](#) licence will apply to this Work are set out in our licence referred to above.

Other than as permitted in any relevant BMJ Author's Self Archiving Policies, I confirm this Work has not been accepted for publication elsewhere, is not being considered for publication elsewhere and does not duplicate material already published. I confirm all authors consent to publication of this Work and authorise the granting of this licence.

## Occupation and SARS-CoV-2 seroprevalence studies: a systematic review

Emily Boucher,<sup>1</sup> Christian Cao<sup>1</sup>, Sean D’Mello,<sup>2</sup> Nathan Duarte,<sup>3</sup> Claire Donnici<sup>1</sup>, Natalie Duarte,<sup>4</sup> Graham Bennett,<sup>5</sup> SeroTracker Consortium, Anil Adisesh,<sup>6-8</sup> Rahul K. Arora,<sup>1,9</sup> David Kodama,<sup>6,10</sup> Niklas Bobrovitz<sup>11,12</sup>

1. Cumming School of Medicine, University of Calgary, Calgary, AB, Canada
2. Faculty of Engineering, University of Waterloo, Waterloo, ON, Canada
3. Faculty of Engineering, McGill University, Montreal, QC, Canada
4. Faculty of Arts and Science, University of Toronto, ON, Canada
5. Department of Economics, Faculty of Arts, McGill University, Montreal, QC, Canada
6. St. Michael’s Hospital, Unity Health Toronto, Toronto, ON, Canada
7. Division of Occupational Medicine, Department of Medicine, University of Toronto, Toronto, ON, Canada
8. Canadian Health Solutions, Saint John, NB, Canada
9. Institute of Biomedical Engineering, University of Oxford, Oxford, UK
10. Division of Emergency Medicine, Department of Medicine, University of Toronto, Toronto, ON, Canada
11. Temerty Faculty of Medicine, University of Toronto, Toronto, ON, Canada
12. Department of Critical Care Medicine, University of Calgary, Calgary, AB, Canada

\*Correspondence to Emily Boucher, Cumming School of Medicine, University of Calgary, Calgary, AB, Canada; [emily.boucher@ucalgary.ca](mailto:emily.boucher@ucalgary.ca)

1  
2  
3  
4  
5  
6  
7  
8  
9  
10  
11  
12  
13  
14  
15  
16  
17  
18  
19  
20  
21  
22  
23  
24  
25  
26  
27  
28  
29  
30  
31  
32  
33  
34  
35  
36  
37  
38  
39  
40  
41  
42  
43  
44  
45  
46  
47  
48  
49  
50  
51  
52  
53  
54  
55  
56  
57  
58  
59  
60

**Word Count** 1411

**Key Words** Covid-19, Infectious diseases, Occupational & industrial medicine

For peer review only

## ABSTRACT

**Objective.** To describe and synthesize studies of SARS-CoV-2 seroprevalence by occupation prior to the widespread vaccine rollout.

**Methods.** We identified studies of occupational seroprevalence from a living systematic review (PROSPERO CRD42020183634). Electronic databases, gray literature, and news media were searched for studies published January-December 2020. Seroprevalence estimates and a free text description of the occupation were extracted and classified according to the Standard Occupational Classification (SOC) 2010 system using a machine-learning algorithm. Due to heterogeneity, results were synthesized narratively.

**Results.** We identified 196 studies including 591,940 participants from 38 countries. Most studies (n=162; 83%) were conducted locally vs regionally or nationally. Sample sizes were generally small (median=220 participants per occupation) and 135 studies (69%) were at a high risk of bias. One or more estimates were available for 21/23 major SOC occupation groups, but over half of the estimates identified (n=359/600) were for healthcare-related occupations. 'Personal Care and Service Occupations' (median 22% [IQR 9-28%]; n=14) had the highest median seroprevalence.

**Conclusions.** Many seroprevalence studies covering a broad range of occupations were published in the first year of the pandemic. Results suggest considerable differences in seroprevalence between occupations, although few large, high-quality studies were done. Well-designed studies are required to improve our understanding of the occupational risk of SARS-CoV-2 and should be considered as an element of pandemic preparedness for future respiratory pathogens.

### Strengths and limitations

- We conducted a comprehensive search of the COVID-19 seroprevalence literature, including non-English articles, government reports, unpublished data.
- Occupations were classified using the Standard Occupational Classification (SOC) 2010 coding system to improve interpretability and facilitate comparison with other datasets.
- Seroprevalence may underestimate the true prevalence of infection because antibody titres decline over time, but where possible we prioritized prevalence estimates for IgG antibodies, which appear to be more robust than other immunoglobulin types.
- We did not adjust for differences in serologic test performance.

For peer review only

## INTRODUCTION

Occupation is a social determinant of health and an important risk factor for SARS-CoV-2 infection. Essential workers in health and social care occupations have an increased risk of COVID-19 compared to non-essential workers, but the risks for other occupations are not well defined.<sup>1-3</sup> Studies examining confirmed COVID-19 cases to examine occupational COVID-19 risk are affected by variable testing rates. For example, testing rates may be higher in workplaces offering testing or paid sick leave, and are impacted by geographic (e.g., urban versus rural) and socio-economic factors (e.g., deprivation), potentially biasing results.<sup>4-6</sup> Few high-quality, prospective studies using frequent, serial molecular or antigen testing covering a broad range of occupations having been conducted, in part due to the costs and administrative burden of such studies.<sup>7,8</sup>

Serologic testing for SARS-CoV-2 antibodies provides evidence of previous infection and/or vaccination depending on vaccination status and the specific antigens targeted and can be used to obtain more accurate estimates of the cumulative incidence of infection.<sup>9</sup> Accurate data on the occupational risks of COVID-19 and other respiratory infections are essential for informing the development of occupational safety guidelines and regulations, transmission control measures and resource allocation (testing, personal protective equipment (PPE), etc.). The objectives of this review were to describe and synthesize studies of SARS-CoV-2 seroprevalence across a broad range of occupations globally prior to the widespread rollout of vaccines.



## METHODS

We identified seroprevalence studies with sample frames or subgrouping variables related to occupation or employment status from a database compiled via a living systematic review (PROSPERO CRD42020183634). The database has been described previously and includes >1000 cohort and cross-sectional studies reporting antibody testing for SARS-CoV-2 in humans identified from electronic databases, grey literature, and news media.<sup>10-12</sup> We restricted the current review to studies published January-December 2020 before vaccines were rolled-out, because differential vaccination rates by occupation may obscure results. We excluded studies that only reported seroprevalence for mixed occupation groups or workplaces (e.g., “hospital staff”) rather than specific occupations, included children <18 years and that could not be machine-translated using Google Translate if unavailable in English or French (**Supplementary File 1**).

We extracted study information, sample characteristics, seroprevalence estimates and study-level risk of bias from the living review database. Risk of bias was assessed with a modified Joanna Briggs Institute Checklist for Prevalence Studies by one reviewer and verified independently as described previously. Overall risk of bias was assessed qualitatively based on whether seroprevalence estimates were very likely (corresponding to a low risk of bias), likely (moderate risk) or unlikely (low risk) to be correct for the author’s stated target population (**Supplementary File 1**).<sup>12,13</sup> If multiple estimates were reported, the most recent estimate using laboratory-based methods (e.g. ELISA), and anti-spike and/or IgG antibodies were prioritized, because non-IgG and anti-nucleocapsid antibodies may decline more rapidly.<sup>14</sup> Free-text

1  
2  
3 descriptions of occupations were extracted from the original studies by one researcher and  
4  
5 reviewed by a second.  
6  
7  
8  
9

10 For each seroprevalence estimate, we identified the relevant Standard Occupational  
11 Classification (SOC) 2010 codes by applying the National Institute for Occupational Safety &  
12 Health (NIOSH) Industry and Occupation Computerized Coding System (NIOCCS) to  
13  
14 occupation descriptions.<sup>15</sup> NIOCCS was chosen, because many studies were conducted in the  
15  
16 USA. Coding was manually verified if there was insufficient information for NIOCCS  
17  
18 classification, or if the probability of correct classification to the six-digit level was <0.8 based  
19  
20 on our review of a subset of the NIOCCS coded data (**Supplementary File 1**). Anticipating  
21  
22 substantial heterogeneity and an insufficient number of estimates relative to covariates for meta-  
23  
24 regression, we planned to summarize data using the median/IQR.  
25  
26  
27  
28  
29  
30  
31

32 **Patient and Public Involvement:** It was not possible or appropriate to involve patients or the  
33  
34 public in this study.  
35  
36  
37

## 38 RESULTS

39  
40  
41 We identified 196 studies of occupational seroprevalence conducted in 2020 during the first and  
42  
43 second waves of the pandemic (**Figure 1**). There were 591,940 participants from 38 countries,  
44  
45 including the USA (n=44 studies), UK (n=16) and Italy (n=15). Most studies (n=162; 83%) were  
46  
47 conducted locally (e.g. city, county) as opposed to regionally (e.g. state; n=20; 10%) or  
48  
49 nationally (n=14; 7%). Most were restricted to one occupational group (n=103), limiting direct  
50  
51 comparisons (i.e. using the same reference group). Sample sizes were often small (median=220,  
52  
53 IQR 64-568 participants). Overall, 135 studies (69%) were at a high risk of bias, 47 moderate  
54  
55  
56  
57  
58  
59  
60

1  
2  
3 (24%), 2 low (1%) and 12 unclear (6%). Common reasons for bias were inadequate statistical  
4 analysis (i.e. no adjustment for test or sample characteristics; 92%), non-probability sampling  
5  
6 (74%), and small sample-size (46%).  
7  
8  
9

10  
11  
12 At least one estimate was available for all 23 major SOC occupation groups, except for ‘Legal’  
13 and ‘Military-Specific’ occupations (**Figure 2**; all studies). Over half of the 600 estimates  
14 identified (n=359) were for healthcare-related occupations. For SOC groups with three or more  
15 estimates, the highest median seroprevalence was reported for ‘Personal Care and Service  
16 Occupations’ (median 22% [IQR 9-28%]; n=14, e.g. ‘Personal Care Aids’). The next highest was  
17 reported for ‘Building and Grounds Cleaning and Maintenance’ occupations (11% [3-22%];  
18 n=17, e.g. ‘Maids and Housekeeping Cleaners’), and ‘Healthcare Support’ (11% [2-20%]; n=39,  
19 e.g. ‘Nursing Assistants’) occupations. The lowest median seroprevalence was 1% (0-11%; n=6,  
20 e.g. ‘Athletes’) for ‘Arts, Design, Entertainment, Sports, and Media Occupations.’ Individual  
21 estimates are listed in **Supplementary File 2**.  
22  
23  
24  
25  
26  
27  
28  
29  
30  
31  
32  
33  
34  
35  
36  
37

## 38 DISCUSSION

39  
40 This review is the first comprehensive synthesis of occupational COVID-19 seroprevalence  
41 studies world-wide. We identified 196 studies representing 21 out of 23 major SOC groups  
42 conducted during the first and second waves of the SARS-CoV-2 pandemic in 2020, prior to the  
43 widespread rollout of vaccines, and described occupational groups with high seroprevalence.  
44  
45  
46  
47  
48  
49

50  
51 Seroprevalence studies may estimate the cumulative incidence of infection more accurately than  
52 diagnostic testing studies when access to testing and test performance are poor, and also can  
53  
54  
55  
56  
57  
58  
59  
60

1  
2  
3 identify asymptomatic infections.<sup>6,8</sup> The data identified suggest considerable differences in  
4 seroprevalence by occupation, though we did not statistically test for differences due to  
5  
6 considerable variation in geography, study dates and workplace determinants of infection (e.g.  
7  
8 PPE, ventilation). ‘Caring and Personal Service’ occupations had the highest median  
9  
10 seroprevalence (22%), which was four-times higher than the unemployed (5%) and median  
11  
12 seroprevalence across all occupational groups (5%). The UK Office for National Statistics  
13  
14 reported a slightly lower cumulative incidence for positive diagnostic or rapid tests for COVID-  
15  
16 19 across 25 occupational groups of 4% (mean),<sup>4</sup> but the discrepancy between the true  
17  
18 cumulative incidence and confirmed infections is likely greater in regions with less access to  
19  
20 testing: national, population-based serosurveys have estimated there are 10-20 serologically  
21  
22 identifiable cases per one confirmed case.<sup>12</sup>  
23  
24  
25  
26  
27  
28  
29  
30

31 In future pandemics, large, well-reported, high-quality seroprevalence studies across a broad  
32  
33 range of occupations are needed at an early stage to inform appropriate workplace policy. It has  
34  
35 been suggested that 20% of the US workforce was exposed to disease or infection at work at  
36  
37 least once a month prior to the pandemic.<sup>16</sup> Accurate data on the occupational risks of respiratory  
38  
39 infections, including SARS-CoV-2 are needed to inform understanding of transmission,  
40  
41 occupational health and safety agency guidelines and allocation of resources (e.g., personal  
42  
43 protective equipment and vaccines) during outbreaks and pandemics. For governments, there are  
44  
45 also issues of occupational disease recognition and compensation to be considered.  
46  
47  
48  
49  
50

51 As such, future population-based studies on respiratory infections should collect data on  
52  
53 occupation. In the case of epidemic infection, collaboration between academic centres with the  
54  
55  
56  
57  
58  
59  
60

1  
2  
3 capacity to conduct large-scale studies and government agencies with expertise in disease  
4 surveillance and access to workplace data (e.g., public health, occupational health and safety)  
5 may be beneficial.<sup>12</sup> Other authors have suggested the utility of occupational surveillance  
6 systems.<sup>17</sup> However, the routine completion of the occupation field in electronic health records  
7 would also serve this purpose as well as informing patient reported outcome measures.  
8  
9  
10  
11  
12  
13  
14  
15

### 16 **Strengths and Limitations**

17  
18 Despite the large number of studies of occupational seroprevalence conducted, many studies had  
19 methodological limitations. Only two studies were at a low risk of bias and most occupational  
20 subgroups had small sample sizes (median 220 participants). Many were limited to one major  
21 SOC group (n=103 studies), which precluded comparisons. Detailed descriptions of occupations  
22 were often lacking, potentially contributing to coding errors and misclassification, and workplace  
23 determinants of infection (e.g. use of PPE) were poorly reported.  
24  
25  
26  
27  
28  
29  
30  
31  
32  
33  
34

35 In conclusion, our review shows that a large number of seroprevalence studies covering a broad  
36 range of occupations were published in the first year of the pandemic. Results suggest  
37 considerable differences in seroprevalence between occupations, although few large, well-  
38 reported, high-quality studies were done. Carefully-designed, adequately powered  
39 seroprevalence studies with coverage of a broad range of occupations could improve our  
40 understanding of the occupational risk of SARS-CoV-2 and other respiratory infections and  
41 should be considered an element of pandemic preparedness and response.  
42  
43  
44  
45  
46  
47  
48  
49  
50  
51  
52  
53  
54  
55  
56  
57  
58  
59  
60

### **Funding Statement**

SeroTracker receives funding for SARS-CoV-2 seroprevalence study evidence synthesis from the Public Health Agency of Canada through Canada's COVID-19 Immunity Task Force (Grant Number 2021-HQ-000056), the World Health Organization Health Emergencies Programme, the Robert Koch Institute, and the Canadian Medical Association Joule Innovation Fund. No funding source had any role in the design of this study, its execution, analyses, interpretation of the data, or decision to submit results. This manuscript does not necessarily reflect the views of the World Health Organization or any other funder.

### **Statement of author's contributions**

This secondary analysis of the SeroTracker database was conceived by NB, EB, DK and AA. Senior authors on this paper were NB, DK, RA and AA. The protocol was developed by EB, NB and DK. Data cleaning was performed by CC, CD, NatalieD, SD and EB and verification by EB, SD, NathanD and GB. Analysis was performed by EB and RA. The first draft of the manuscript was written by EB and revised by EB, RA, NB, NathanD, GB, SD, CC, AA, DK. The SeroTracker Consortium maintained the living systematic review database used in the study. All authors reviewed and agreed to the findings, and also provided critical revisions to the paper.

### **Disclosure of potential and actual conflicts of interest**

RKA was previously a Technical Consultant for the Bill and Melinda Gates Foundation Strategic Investment Fund, is a minority shareholder of Alethea Medical, and was a former Senior Policy Advisor at Health Canada. Each of these relationships is unrelated to the present work.

1  
2  
3 JP reports grants to his institution from MedImmune, Sanofi Pasteur, Merck and AbbVie, and  
4  
5 personal fees for lectures from AbbVie and Astra-Zeneca, all outside of the submitted work.  
6  
7  
8  
9

10 MPC reports grants from McGill Interdisciplinary Initiative in Infection and Immunity, grants  
11  
12 from Canadian Institutes of Health Research, during the conduct of the study; personal fees from  
13  
14 GEn1E Lifesciences, personal fees from nplex biosciences, personal fees from Kanvas  
15  
16 biosciences, personal fees from AstraZeneca, non-financial support from Cidara therapeutics,  
17  
18 non-financial support from Scynexis, Inc., non-financial support from Amplyx Pharmaceuticals,  
19  
20 outside the submitted work. In addition, MPC has a patent for methods detecting tissue damage,  
21  
22 graft versus host disease, and infections using cell-free DNA profiling pending, a patent for  
23  
24 methods assessing the severity and progression of SARS-CoV-2 infections using cell-free DNA  
25  
26 pending, a patent for rapid identification of antimicrobial resistance and other microbial  
27  
28 phenotypes using highly-multiplexed fluorescence in situ hybridization pending, and a patent  
29  
30 highly multiplexed detection of gene expression with hybridization chain reaction pending, all  
31  
32 outside the submitted work.  
33  
34  
35  
36  
37  
38

39 **Ethics approval:** Not applicable. This study did not involve human participants or animals.  
40

41 **Dating sharing:** Seroprevalence data can be downloaded (or requested) from  
42 <https://serotracker.com>.  
43  
44  
45  
46  
47  
48  
49  
50  
51  
52  
53  
54  
55  
56  
57  
58  
59  
60

## REFERENCES

1. Magnusson K, Nygard KM, Methi F, Vold L, Telle K. Occupational risk of COVID-19 in the first versus second epidemic wave in Norway, 2020. *Euro Surveill* 2021;26:2001875.
2. Mutambudzi M, Niedwiedz C, Macdonald EB, et al. Occupation and risk of severe COVID-19: prospective cohort study of 120 075 UK Biobank participants. *Occup Environ Med* 2021;78:307-14.
3. Nguyen LH, Drew DA, Graham MS, et al. Risk of COVID-19 among front-line health-care workers and the general community: a prospective cohort study. *Lancet Public Health* 2020;5:e475-83.
4. Seo E, Mun E, Kim W, Lee C. Fighting the COVID-19 pandemic: onsite mass workplace testing for COVID-19 in the Republic of Korea. *Ann Occup Environ Med* 2020;32:e22.
5. Tan TQ, Kullar R, Swartz TH, Mathew TA, Piggott DA, Berthaud V. Location matters: geographic disparities and impact of coronavirus disease 2019. *J Infect Dis* 2020;222:1951-4.
6. Duarte N, D’Mello S, Duarte NA, et al. Uptake of SARS-CoV-2 workplace testing programs, March 2020 to March 2021. *MedRxiv* 21259730 [Preprint]. July 31 2021 [cited December 28 2021] doi: <https://doi.org/10.1101/2021.06.29.21259730>
7. Office for National Statistics. Coronavirus (COVID-19) Infection Survey: characteristics of people testing positive for COVID-19 in England. 2021 Feb 22. Available from: <https://www.ons.gov.uk/peoplepopulationandcommunity/healthandsocialcare/conditionsanddiseases/articles/coronaviruscovid19infectionsinthecommunityinengland/characteristicsofpeopletestingpositiveforcovid19inengland22february2021>
8. Pearce N, Rhodes S, Stocking K, et al. Occupational differences in COVID-19 incidence, severity, and mortality in the United Kingdom: Available data and framework for analyses. *Wellcome Open Res* 2021;6:102.
9. Duarte N, Yanes-Lane M, Arora RK, et al. Adapting Serosurveys for the SARS-CoV-2 Vaccine Era. *Open Forum Infect Dis* 2021;9:ofab632.
10. Arora RK, Joseph A, Van Wyk J, et al. SeroTracker: a global SARS-CoV-2 seroprevalence dashboard. *Lancet Infect Dis* 2021;21:e75–6.

[dataset] 11. SeroTracker Consortium. Data from: Our Data. November 7, 2021.

<https://serotracker.com/data>



- 1  
2  
3  
4  
5  
6  
7  
8  
9  
10  
11  
12  
13  
14  
15  
16  
17  
18  
19  
20  
21  
22  
23  
24  
25  
26  
27  
28  
29  
30  
31  
32  
33  
34  
35  
36  
37  
38  
39  
40  
41  
42  
43  
44  
45  
46  
47  
48  
49  
50  
51  
52  
53  
54  
55  
56  
57  
58  
59  
60
12. Bobrovitz N, Arora RK, Cao C, et al. Global seroprevalence of SARS-CoV-2 antibodies: a systematic review and meta-analysis. *PloS ONE* 2021;16:e0252617.
  13. Munn Z, Moola S, Lisy K, Riitano D, Tufanaru C. Methodological guidance for systematic reviews of observational epidemiological studies reporting prevalence and incidence data. *Int J Evid Based Healthc* 2015;13:147–153.
  14. Isho B, Abe KT, Zuo M, et al. Persistence of serum and saliva antibody responses to SARS-CoV-2 spike antigens in COVID-19 patients. *Sci Immunol* 2020;5:eabe5511.
  15. NIOSH. NIOSH Industry and Occupation Computerized Coding System (NIOCCS). U.S. Department of Health and Human Services, Public Health Service, Centers for Disease Control and Prevention, National Institute for Occupational Safety and Health, Division of Field Studies & Engineering, Health Informatics Branch. <https://csams.cdc.gov/nioccs/About.aspx>. Date accessed Sept 1, 2021.
  16. Baker MG, Peckham TK, Seixas NS. Estimating the burden of United States workers exposed to infection or disease: a key factor in containing risk of COVID-19 infection. *PloS ONE* 2020;15:e0232452.
  17. Marinaccio A, Boccuni F, Rondinone BM, Brusco A, D'Amario S, Iavicoli S. Occupational factors in the COVID-19 pandemic in Italy: compensation claims applications support establishing an occupational surveillance system. *Occup Environ Med* 2020;77:818-21.

1  
2  
3 **Figure Legends**  
4  
5  
6  
7

8 **Figure 1.** PRISMA flow diagram  
9

10  
11  
12 **Figure 2.** Seroprevalence by SOC 2010 major occupation group. \*Estimates are a mix of  
13  
14 ‘Healthcare Practitioners and Technical Occupations’ and ‘Healthcare Support Occupations’ (see  
15  
16 next page)  
17  
18  
19

20  
21 **Supplementary File 1.** Supplementary methods  
22

23  
24 **Supplementary File 2.** Summary of included studies and references  
25  
26  
27  
28  
29  
30  
31  
32  
33  
34  
35  
36  
37  
38  
39  
40  
41  
42  
43  
44  
45  
46  
47  
48  
49  
50  
51  
52  
53  
54  
55  
56  
57  
58  
59  
60

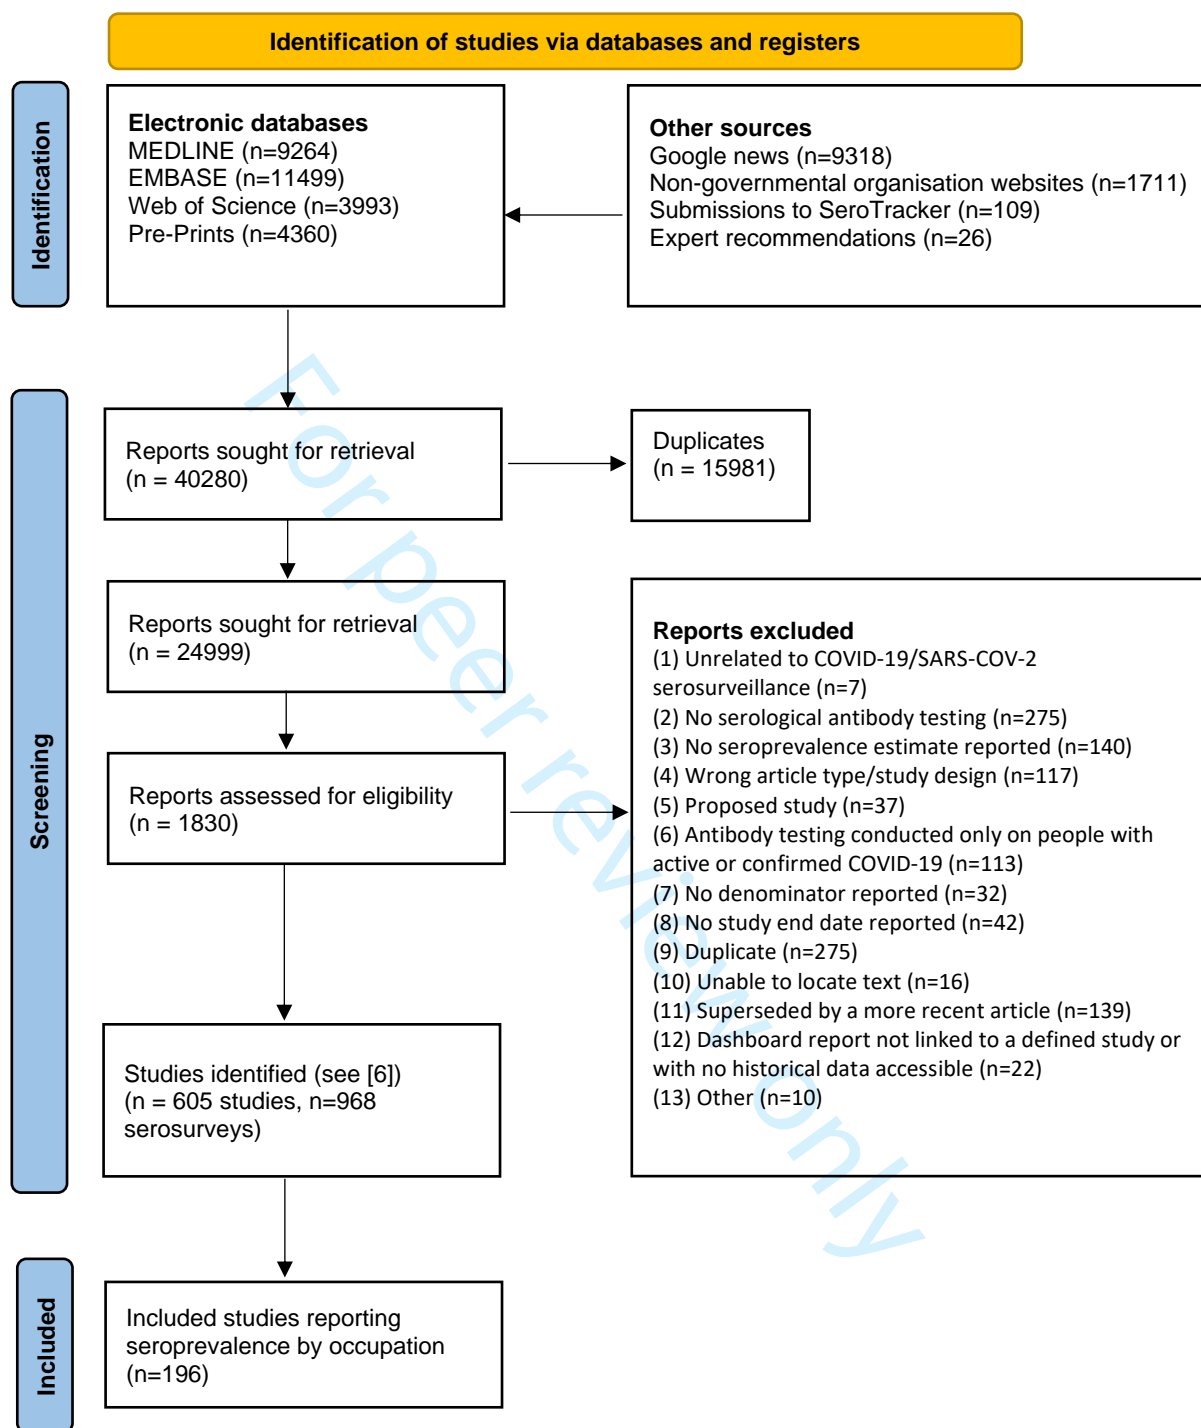

From: Page MJ, McKenzie JE, Bossuyt PM, Boutron I, Hoffmann TC, Mulrow CD, et al. The PRISMA 2020 statement: an updated guideline for reporting systematic reviews. *BMJ* 2021;372:n71. doi: 10.1136/bmj.n71

For more information, visit: <http://www.prisma-statement.org/>

| SOC 2010 Major Occupation Group                                         | Total     |           | BMJ Open              | Median, IQR    |                    | Seroprevalence % |                  | Page 18 of 119 |
|-------------------------------------------------------------------------|-----------|-----------|-----------------------|----------------|--------------------|------------------|------------------|----------------|
|                                                                         | Estimates | Countries | Study dates, midpoint | Sample size    | (Median, IQR)      | (Scale 0-75%)    | Low-Moderate RoB |                |
| 1 Architecture and Engineering Occupations (17-0000)                    | 1         | 1         | 15/08 (15/08-15/08)   | 21 (21-21)     | 42.9 (42.9-42.9)   |                  | 0 (0%)           |                |
| 2 Personal Care and Service Occupations (39-0000)                       | 14        | 7         | 03/05 (02/04-02/06)   | 127 (54-302)   | 21.5 (9.32-27.76)  |                  | 3 (21%)          |                |
| 3 Installation, Maintenance, and Repair Occupations (49-0000)           | 1         | 1         | 19/06 (19/06-19/06)   | 134 (134-134)  | 16.4 (16.4-16.4)   |                  | 0 (0%)           |                |
| 4 Building and Grounds Cleaning and Maintenance Occupations (37-0000)   | 17        | 8         | 13/07 (09/06-16/08)   | 102 (42-226)   | 10.8 (3.3-21.7)    |                  | 6 (35%)          |                |
| 5 Healthcare Support Occupations (31-0000)                              | 39        | 12        | 05/06 (19/05-21/06)   | 263 (122-562)  | 10.7 (2-20.05)     |                  | 12 (31%)         |                |
| 6 Business and Financial Operations Occupations (13-0000)               | 2         | 2         | 05/07 (18/06-22/07)   | 462 (252-671)  | 8.27 (5.3-11.23)   |                  | 2 (100%)         |                |
| 8 Management Occupations (11-0000)                                      | 10        | 6         | 17/06 (01/05-02/08)   | 44 (23-145)    | 8.17 (6.7-19.93)   |                  | 3 (30%)          |                |
| 9 Food Preparation and Serving Related Occupations (35-0000)            | 6         | 4         | 17/06 (11/05-23/07)   | 58 (12-108)    | 6.35 (2.37-24.03)  |                  | 2 (33%)          |                |
| 10 Healthcare Practitioners and Technical Occupations (29-0000)         | 222       | 23        | 13/06 (13/05-13/07)   | 215 (64-482)   | 5.91 (1.83-11.71)  |                  | 84 (38%)         |                |
| 11 Healthcare Practitioners and Technical Occupations, 5-digit codes**  |           |           |                       |                |                    |                  |                  |                |
| 12 Miscellaneous Health Technologists and Technicians                   | 4         | 3         | 26/08 (09/08-12/09)   | 60 (20-121)    | 12.96 (9.09-27.54) |                  | 1 (25%)          |                |
| 13 Registered Nurses                                                    | 78        | 18        | 05/06 (05/05-05/07)   | 329 (71-1000)  | 8.44 (3.68-15.5)   |                  | 22 (28%)         |                |
| 14 Clinical Laboratory Technologists and Technicians                    | 18        | 12        | 15/06 (19/05-11/07)   | 204 (86-284)   | 6.22 (2.07-11.94)  |                  | 12 (67%)         |                |
| 16 Physicians and Surgeons                                              | 65        | 21        | 09/06 (10/05-09/07)   | 214 (59-564)   | 5.88 (1.85-11.8)   |                  | 23 (35%)         |                |
| 17 Emergency Medical Technicians and Paramedics                         | 9         | 6         | 13/06 (27/05-30/06)   | 157 (56-243)   | 5.41 (5.2-11)      |                  | 4 (44%)          |                |
| 18 Therapists                                                           | 15        | 4         | 08/06 (19/05-28/06)   | 121 (61-235)   | 3.75 (0-9.45)      |                  | 7 (47%)          |                |
| 19 Physician Assistants                                                 | 9         | 2         | 27/06 (26/05-28/07)   | 230 (156-320)  | 3.48 (0.64-9.43)   |                  | 3 (33%)          |                |
| 21 Pharmacists                                                          | 9         | 7         | 29/06 (14/06-14/07)   | 113 (29-213)   | 0.5 (0-3.45)       |                  | 4 (44%)          |                |
| 22 Healthcare Occupations (mixed)*                                      | 94        | 25        | 05/06 (29/04-12/07)   | 375 (110-1012) | 5.66 (2.35-11.6)   |                  | 23 (24%)         |                |
| 23 Sales and Related Occupations (41-0000)                              | 23        | 8         | 21/08 (22/06-19/10)   | 643 (236-1184) | 5.3 (1.2-8.8)      |                  | 6 (26%)          |                |
| 24 Education, Training, and Library Occupations (25-0000)               | 6         | 5         | 05/07 (12/06-27/07)   | 238 (73-1305)  | 5.07 (2.71-17.22)  |                  | 3 (50%)          |                |
| 25 Farming, Fishing, and Forestry Occupations (45-0000)                 | 3         | 3         | 13/07 (25/06-30/07)   | 80 (66-100)    | 5 (2.5-5)          |                  | 1 (33%)          |                |
| 26 Not employed (mixed)*                                                | 37        | 14        | 23/06 (12/05-04/08)   | 382 (116-905)  | 4.9 (2.7-14.97)    |                  | 28 (76%)         |                |
| 28 Office and Administrative Support Occupations (43-0000)              | 39        | 18        | 14/06 (18/05-11/07)   | 120 (32-522)   | 4.88 (1.36-13.36)  |                  | 20 (51%)         |                |
| 29 First responders (mixed)*                                            | 6         | 1         | 18/05 (13/05-22/05)   | 219 (72-599)   | 4.67 (1.6-7.34)    |                  | 1 (17%)          |                |
| 30 Community and Social Service Occupations (21-0000)                   | 6         | 2         | 30/05 (18/05-11/06)   | 104 (49-188)   | 4.45 (2.13-6.1)    |                  | 1 (17%)          |                |
| 32 Protective Service Occupations (33-0000)                             | 28        | 9         | 04/07 (21/05-16/08)   | 190 (46-555)   | 4.29 (2.17-7.47)   |                  | 6 (21%)          |                |
| 33 Transportation and Material Moving Occupations (53-0000)             | 23        | 7         | 08/08 (08/06-08/10)   | 230 (80-364)   | 3.5 (1.8-11.8)     |                  | 8 (35%)          |                |
| 34 Life, Physical, and Social Science Occupations (19-0000)             | 11        | 7         | 06/07 (11/06-30/07)   | 343 (174-570)  | 2.6 (1.66-6.46)    |                  | 4 (36%)          |                |
| 35 Production Occupations (51-0000)                                     | 4         | 3         | 23/05 (26/04-19/06)   | 764 (342-1132) | 1.52 (1.45-4.93)   |                  | 2 (50%)          |                |
| 36 Arts, Design, Entertainment, Sports, and Media Occupations (27-0000) | 6         | 5         | 07/07 (04/06-09/08)   | 164 (47-823)   | 1.39 (0.18-11.02)  |                  | 3 (50%)          |                |
| 38 Computer and Mathematical Occupations (15-0000)                      | 1         | 1         | 03/05 (03/05-03/05)   | 47 (47-47)     | 0 (0-0)            |                  | 1 (100%)         |                |
| 39 Construction and Extraction Occupations (47-0000)                    | 1         | 1         | 03/05 (03/05-03/05)   | 42 (42-42)     | 0 (0-0)            |                  | 1 (100%)         |                |

### Supplementary File 1 Materials

#### Table of Contents

|                                                 |           |
|-------------------------------------------------|-----------|
| <b>Supplementary files.....</b>                 | <b>2</b>  |
| S1. PRISMA checklist.....                       | 2         |
| S2. Search strategy .....                       | 4         |
| S3. Detailed eligibility criteria .....         | 8         |
| S4. Tool for assessing study risk of bias.....  | 9         |
| S5. Details of occupational coding.....         | 12        |
| <b>References for supplementary files .....</b> | <b>14</b> |

For peer review only

13 **Supplementary Material**14 **S1. PRISMA checklist**  
15

| Section/topic                      | #  | Checklist item                                                                                                                                                                                                                                                                                              | Reported on page #                                |
|------------------------------------|----|-------------------------------------------------------------------------------------------------------------------------------------------------------------------------------------------------------------------------------------------------------------------------------------------------------------|---------------------------------------------------|
| <b>TITLE</b>                       |    |                                                                                                                                                                                                                                                                                                             |                                                   |
| Title                              | 1  | Identify the report as a systematic review, meta-analysis, or both.                                                                                                                                                                                                                                         | 0                                                 |
| <b>ABSTRACT</b>                    |    |                                                                                                                                                                                                                                                                                                             |                                                   |
| Structured summary                 | 2  | Provide a structured summary including, as applicable: background; objectives; data sources; study eligibility criteria, participants, and interventions; study appraisal and synthesis methods; results; limitations; conclusions and implications of key findings; systematic review registration number. | 1                                                 |
| <b>INTRODUCTION</b>                |    |                                                                                                                                                                                                                                                                                                             |                                                   |
| Rationale                          | 3  | Describe the rationale for the review in the context of what is already known.                                                                                                                                                                                                                              | 3, lines 14-30                                    |
| Objectives                         | 4  | Provide an explicit statement of questions being addressed with reference to participants, interventions, comparisons, outcomes, and study design (PICOS).                                                                                                                                                  | 3, line 30-32                                     |
| <b>METHODS</b>                     |    |                                                                                                                                                                                                                                                                                                             |                                                   |
| Protocol and registration          | 5  | Indicate if a review protocol exists, if and where it can be accessed (e.g., Web address), and, if available, provide registration information including registration number.                                                                                                                               | 3, line 39                                        |
| Eligibility criteria               | 6  | Specify study characteristics (e.g., PICOS, length of follow-up) and report characteristics (e.g., years considered, language, publication status) used as criteria for eligibility, giving rationale.                                                                                                      | 4, lines 39-45                                    |
| Information sources                | 7  | Describe all information sources (e.g., databases with dates of coverage, contact with study authors to identify additional studies) in the search and date last searched.                                                                                                                                  | 4, lines 39-40                                    |
| Search                             | 8  | Present full electronic search strategy for at least one database, including any limits used, such that it could be repeated.                                                                                                                                                                               | Suppl. File 2                                     |
| Study selection                    | 9  | State the process for selecting studies (i.e., screening, eligibility, included in systematic review, and, if applicable, included in the meta-analysis).                                                                                                                                                   | 4, lines 41-43                                    |
| Data collection process            | 10 | Describe method of data extraction from reports (e.g., piloted forms, independently, in duplicate) and any processes for obtaining and confirming data from investigators.                                                                                                                                  | 4, lines 41-49, 57-58                             |
| Data items                         | 11 | List and define all variables for which data were sought (e.g., PICOS, funding sources) and any assumptions and simplifications made.                                                                                                                                                                       | 4, lines 44-45 (see reference to previous study)  |
| Risk of bias in individual studies | 12 | Describe methods used for assessing risk of bias of individual studies (including specification of whether this was done at the study or outcome level), and how this information is to be used in any data synthesis.                                                                                      | 4, see reference and Suppl. File 1                |
| Summary measures                   | 13 | State the principal summary measures (e.g., risk ratio, difference in means).                                                                                                                                                                                                                               | 4, lines 57-78                                    |
| Synthesis of results               | 14 | Describe the methods of handling data and combining results of studies, if done, including measures of consistency (e.g., $I^2$ ) for each meta-analysis.                                                                                                                                                   | 4, lines 57-58                                    |
| Risk of bias across studies        | 15 | Specify any assessment of risk of bias that may affect the cumulative evidence (e.g., publication bias, selective reporting within studies).                                                                                                                                                                | 4, lines 47-48                                    |
| Additional analyses                | 16 | Describe methods of additional analyses (e.g., sensitivity or subgroup analyses, meta-regression), if done, indicating which were pre-specified.                                                                                                                                                            | NA                                                |
| <b>RESULTS</b>                     |    |                                                                                                                                                                                                                                                                                                             |                                                   |
| Study selection                    | 17 | Give numbers of studies screened, assessed for eligibility, and included in the review, with reasons for exclusions at each stage, ideally with a flow diagram.                                                                                                                                             | Suppl File 1                                      |
| Study characteristics              | 18 | For each study, present characteristics for which data were extracted (e.g., study size, PICOS, follow-up period) and provide the citations.                                                                                                                                                                | Suppl. File 2                                     |
| Risk of bias within studies        | 19 | Present data on risk of bias of each study and, if available, any outcome level assessment (see item 12).                                                                                                                                                                                                   | Suppl. File 2                                     |
| Results of individual studies      | 20 | For all outcomes considered (benefits or harms), present, for each study: (a) simple summary data for each intervention group (b) effect estimates and confidence intervals, ideally with a forest plot.                                                                                                    | Suppl. File 2                                     |
| Synthesis of results               | 21 | Present results of each meta-analysis done, including confidence intervals and measures of consistency.                                                                                                                                                                                                     | NA – see narrative synthesis on page 5 & Figure 1 |
| Risk of bias across studies        | 22 | Present results of any assessment of risk of bias across studies (see Item 15).                                                                                                                                                                                                                             | 5, lines 72-75<br>Figure 1                        |
| Additional analysis                | 23 | Give results of additional analyses, if done (e.g., sensitivity or subgroup analyses, meta-regression [see Item 16]).                                                                                                                                                                                       | NA                                                |
| <b>DISCUSSION</b>                  |    |                                                                                                                                                                                                                                                                                                             |                                                   |
| Summary of evidence                | 24 | Summarize the main findings including the strength of evidence for each main outcome; consider their relevance to key groups (e.g., healthcare providers, users, and                                                                                                                                        | 6, lines 110-118                                  |

|                |    |                                                                                                                                                               |                  |
|----------------|----|---------------------------------------------------------------------------------------------------------------------------------------------------------------|------------------|
|                |    | policy makers).                                                                                                                                               |                  |
| Limitations    | 25 | Discuss limitations at study and outcome level (e.g., risk of bias), and at review-level (e.g., incomplete retrieval of identified research, reporting bias). | 6, lines 131-136 |
| Conclusions    | 26 | Provide a general interpretation of the results in the context of other evidence, and implications for future research.                                       | 6, lines 119-120 |
| <b>FUNDING</b> |    |                                                                                                                                                               |                  |
| Funding        | 27 | Describe sources of funding for the systematic review and other support (e.g., supply of data); role of funders for the systematic review.                    | 9                |

16

For peer review only



## S2. Search strategy

Database: Ovid MEDLINE(R) and Epub Ahead of Print, In-Process & Other Non-Indexed Citations and Daily

Dates: January 1, 2020 to December 31, 2020

Notes: Covid-19 search terms were adapted from Ovid Expert Searches

| #  | Search terms                                                                                                                                                                                                                                                                                                                                                                                                                                                                                        |
|----|-----------------------------------------------------------------------------------------------------------------------------------------------------------------------------------------------------------------------------------------------------------------------------------------------------------------------------------------------------------------------------------------------------------------------------------------------------------------------------------------------------|
| 1  | exp Coronavirus/                                                                                                                                                                                                                                                                                                                                                                                                                                                                                    |
| 2  | exp Coronavirus Infections/                                                                                                                                                                                                                                                                                                                                                                                                                                                                         |
| 3  | (coronavirus* or corona virus* or OC43 or NL63 or 229E or HKU1 or HCoV* or ncov* or covid* or sars-cov* or sarscov* or Sars-coronavirus* or Severe Acute Respiratory Syndrome Coronavirus*).tw,kf.[EB2]                                                                                                                                                                                                                                                                                             |
| 4  | or/1-3                                                                                                                                                                                                                                                                                                                                                                                                                                                                                              |
| 5  | 4 not ((MERS or MERS-CoV or Middle East respiratory syndrome or camel* or dromedar* or equine or coronary or coronal or coidence* or covidien or influenza virus or HIV or bovine or calves or TGEV or feline or porcine or BCoV or PED or PEDV or PDCoV or FIPV or FCoV or SADS-CoV or canine or CCov or zoonotic or avian influenza or H1N1 or H5N1 or H5N6 or IBV).mp. or (animals/ not humans/))                                                                                                |
| 6  | ((pneumonia or covid* or coronavirus* or corona virus* or ncov* or 2019-ncov or sars* or virus).tw,kf. or exp pneumonia/) and Wuhan.tw,kf.                                                                                                                                                                                                                                                                                                                                                          |
| 7  | (2019-ncov* or 2019nCov* or ncov19 or ncov-19 or 2019-novel CoV or sars-cov2* or sars-cov-2* or sarscov2* or sarscov-2* or Sars-coronavirus2 or Sars-coronavirus-2 or SARS-like coronavirus* or coronavirus 2 or coronavirus2* or corona or coronavirus-19 or covid19 or covid-19 or covid 2019 or ((novel or new or nouveau) adj2 (CoV or nCoV or covid or coronavirus* or corona virus or Pandemi*2)) or ((covid or covid19* or covid-19) and pandemic*2) or (coronavirus* and pneumonia)).tw,kf. |
| 8  | COVID-19.rx,px,ox. or severe acute respiratory syndrome coronavirus 2.os.                                                                                                                                                                                                                                                                                                                                                                                                                           |
| 9  | or/6-8                                                                                                                                                                                                                                                                                                                                                                                                                                                                                              |
| 10 | 5 or 9                                                                                                                                                                                                                                                                                                                                                                                                                                                                                              |
| 11 | immunoglobulins/ or antibodies/ or antibodies, blocking/ or exp antibodies, neutralizing/ or antibodies, viral/ or antigen-antibody complex/ or immune sera/ or exp immunoglobulin isotypes/ or immunoglobulin a/ or immunoglobulin d/ or immunoglobulin e/ or immunoglobulin g/ or immunoglobulin m/                                                                                                                                                                                               |
| 12 | serologic tests/ or complement fixation tests/ or hemagglutination inhibition tests/ or neutralization tests/                                                                                                                                                                                                                                                                                                                                                                                       |
| 13 | immunoassay/ or fluoroimmunoassay/ or exp immunoblotting/ or immunoenzyme techniques/ or exp enzyme-linked immunosorbent assay/ or exp enzyme-linked immunosorbent assay/ or immunosorbent techniques/ or serologic tests/ or complement fixation tests/ or hemagglutination inhibition tests/ or neutralization tests/ or Serology/di                                                                                                                                                              |
| 14 | (enzyme linked immunosorbent or enzyme-linked immunosorbent or ELISA or immunofluorescence or complement fixation or hemagglutination inhibition or immunoblot or western blot or neutrali*).tw,kf.                                                                                                                                                                                                                                                                                                 |
| 15 | (antibod* or immunoglobulin* or immune globulin* or titer* or isotype* or IgG or IgM or IgA or neutrali* or sera or serum or serolog* or saliva).tw,kf.                                                                                                                                                                                                                                                                                                                                             |
| 16 | or/11-14                                                                                                                                                                                                                                                                                                                                                                                                                                                                                            |
| 17 | seroepidemiologic studies/                                                                                                                                                                                                                                                                                                                                                                                                                                                                          |
| 18 | incidence/ or prevalence/                                                                                                                                                                                                                                                                                                                                                                                                                                                                           |
| 19 | (seroconver* or seroprevalence or sero-prevalence or seroincidence or sero-incidence or seroepidemiolog* or sero-epidemiolog*).mp.                                                                                                                                                                                                                                                                                                                                                                  |
| 20 | (inciden* or prevalen* or count* or rate*).mp.                                                                                                                                                                                                                                                                                                                                                                                                                                                      |
| 21 | (serosurvey or sero-survey or screen* or diagnostic).mp.                                                                                                                                                                                                                                                                                                                                                                                                                                            |
| 22 | (seroconver* or seroprevalence or sero-prevalence or seroincidence or sero-incidence or seroepidemiolog* or sero-epidemiolog* or inciden* or prevalen* or silent or asymptomatic or serosurvey or sero-survey).tw,kf.                                                                                                                                                                                                                                                                               |
| 23 | or/17-21                                                                                                                                                                                                                                                                                                                                                                                                                                                                                            |
| 24 | 10 and (16 and 23)                                                                                                                                                                                                                                                                                                                                                                                                                                                                                  |
| 25 | 10 and 15                                                                                                                                                                                                                                                                                                                                                                                                                                                                                           |
| 26 | 10 and 22                                                                                                                                                                                                                                                                                                                                                                                                                                                                                           |
| 27 | or/24-26                                                                                                                                                                                                                                                                                                                                                                                                                                                                                            |
| 28 | limit 27 to yr="2020-Current"                                                                                                                                                                                                                                                                                                                                                                                                                                                                       |
| 29 | remove duplicates from 28                                                                                                                                                                                                                                                                                                                                                                                                                                                                           |



**Database: Embase****Dates:** January 1, 2020 to December 31, 2020**Notes:** Covid-19 search terms were adapted from Ovid Expert Searches

| #  | Searches                                                                                                                                                                                                                                                                                                                                                                                                                             |
|----|--------------------------------------------------------------------------------------------------------------------------------------------------------------------------------------------------------------------------------------------------------------------------------------------------------------------------------------------------------------------------------------------------------------------------------------|
| 1  | exp Coronavirus/                                                                                                                                                                                                                                                                                                                                                                                                                     |
| 2  | exp Coronavirus Infections/                                                                                                                                                                                                                                                                                                                                                                                                          |
| 3  | (coronavirus* or corona virus* or OC43 or NL63 or 229E or HKU1 or HCoV* or nCoV* or covid* or sars-cov* or sarscov* or Sars-coronavirus* or Severe Acute Respiratory Syndrome Coronavirus*).tw,kw.                                                                                                                                                                                                                                   |
| 4  | or/1-3                                                                                                                                                                                                                                                                                                                                                                                                                               |
| 5  | 4 not ((MERS or MERS-CoV or Middle East respiratory syndrome or camel* or dromedar* or equine or coronary or coronal or coidence* or covidien or influenza virus or HIV or bovine or calves or TGEV or feline or porcine or BCoV or PED or PEDV or PDCoV or FIPV or FCoV or SADS-CoV or canine or CCov or zoonotic or avian influenza or H1N1 or H5N1 or H5N6 or IBV).mp. or (animals/ not humans/))                                 |
| 6  | ((pneumonia or covid* or coronavirus* or corona virus* or nCoV* or 2019-nCoV or sars*).tw,kw. or exp pneumonia/) and Wuhan.tw,kw.                                                                                                                                                                                                                                                                                                    |
| 7  | (2019-nCoV or nCoV19 or nCoV-19 or 2019-novel CoV or sars-cov2 or sars-cov-2 or sarscov2 or sarscov-2 or Sars-coronavirus2 or Sars-coronavirus-2 or SARS-like coronavirus* or coronavirus-19 or covid19 or covid-19 or covid 2019 or ((novel or new or nouveau) adj2 (CoV or nCoV or covid or coronavirus* or corona virus or Pandemi*2)) or ((covid or covid19 or covid-19) and pandemic*2) or (coronavirus* and pneumonia)).tw,kw. |
| 8  | (coronavirus disease 2019 or severe acute respiratory syndrome coronavirus 2).sh,dj.                                                                                                                                                                                                                                                                                                                                                 |
| 9  | 6 or 7 or 8                                                                                                                                                                                                                                                                                                                                                                                                                          |
| 10 | 5 or 9                                                                                                                                                                                                                                                                                                                                                                                                                               |
| 11 | virus antibody/ec [Endogenous Compound]                                                                                                                                                                                                                                                                                                                                                                                              |
| 12 | neutralizing antibody/ec [Endogenous Compound]                                                                                                                                                                                                                                                                                                                                                                                       |
| 13 | exp immunoglobulin/ or exp immunoglobulin A antibody/ or exp immunoglobulin class/ or exp immunoglobulin M antibody/ or exp immunoglobulin G antibody/ or exp immunoglobulin antibody/                                                                                                                                                                                                                                               |
| 14 | 11 or 12 or 13                                                                                                                                                                                                                                                                                                                                                                                                                       |
| 15 | serology/                                                                                                                                                                                                                                                                                                                                                                                                                            |
| 16 | serodiagnosis/ or complement fixation test/ or hemagglutination inhibition test/ or hemolytic plaque assay/                                                                                                                                                                                                                                                                                                                          |
| 17 | fluorescent antibody technique/                                                                                                                                                                                                                                                                                                                                                                                                      |
| 18 | immunofluorescence test/ or viral disease immunofluorescence assay/                                                                                                                                                                                                                                                                                                                                                                  |
| 19 | enzyme linked immunosorbent assay/                                                                                                                                                                                                                                                                                                                                                                                                   |
| 20 | western blotting/                                                                                                                                                                                                                                                                                                                                                                                                                    |
| 21 | (enzyme linked immunosorbent or enzyme-linked immunosorbent or ELISA or immunoassay or immunofluorescence or fluorescent antibody or complement fixation or hemagglutination inhibition or hemolytic plaque assay or immunoblot or western blot or neutrali*).tw,kw.                                                                                                                                                                 |
| 22 | (antibod* or immunoglobulin* or immune globulin* or titer* or isotype* or IgG or IgM or IgA or neutrali* or sera or serolog* or serum or saliva).tw,kw.                                                                                                                                                                                                                                                                              |
| 23 | 15 or 16 or 17 or 18 or 19 or 20 or 21                                                                                                                                                                                                                                                                                                                                                                                               |
| 24 | 14 or 23                                                                                                                                                                                                                                                                                                                                                                                                                             |
| 25 | exp seroepidemiology/                                                                                                                                                                                                                                                                                                                                                                                                                |
| 26 | *prevalence/                                                                                                                                                                                                                                                                                                                                                                                                                         |
| 27 | *incidence/                                                                                                                                                                                                                                                                                                                                                                                                                          |
| 28 | (seroconver* or seroprevalence or sero-prevalence or seroincidence or sero-incidence or seroepidemiolog* or sero-epidemiolog* or inciden* or prevalen* or count* or rate* or serosurvey or sero-survey or screen* or diagnostic).mp.                                                                                                                                                                                                 |
| 29 | (seroconver* or seroprevalence or sero-prevalence or seroincidence or sero-incidence or seroepidemiolog* or sero-epidemiolog* or inciden* or prevalen* or silent or asymptomatic or serosurvey or sero-survey).tw,kw.                                                                                                                                                                                                                |
| 30 | 25 or 26 or 27 or 28                                                                                                                                                                                                                                                                                                                                                                                                                 |
| 31 | 10 and (24 and 30)                                                                                                                                                                                                                                                                                                                                                                                                                   |
| 32 | 10 and 22                                                                                                                                                                                                                                                                                                                                                                                                                            |
| 33 | 10 and 29                                                                                                                                                                                                                                                                                                                                                                                                                            |
| 34 | 31 or 32 or 33                                                                                                                                                                                                                                                                                                                                                                                                                       |
| 35 | limit 34 to yr="2020-Current"                                                                                                                                                                                                                                                                                                                                                                                                        |
| 36 | remove duplicates from 35                                                                                                                                                                                                                                                                                                                                                                                                            |

Database: Web of Science Core Collection

Date: January 1, 2020 to December 31, 2020

| #  | Searches                                                                                                                                                                                                                                                                                                                                                                       |
|----|--------------------------------------------------------------------------------------------------------------------------------------------------------------------------------------------------------------------------------------------------------------------------------------------------------------------------------------------------------------------------------|
| 1  | TS=(coronavirus* or corona virus* or OC43 or NL63 or 229E or HKU1 or HCoV* or nCoV* or covid* or sars-cov* or sarscov* or Sars-coronavirus* or Severe Acute Respiratory Syndrome Coronavirus*)                                                                                                                                                                                 |
| 2  | TS=(MERS or MERS-CoV or Middle East respiratory syndrome or camel* or dromedar* or equine or coronary or coronal or coidence* or covidien or influenza virus or HIV or bovine or calves or TGEV or feline or porcine or BCoV or PED or PEDV or PDCoV or FIPV or FCoV or SADS-CoV or canine or CCov or zoonotic or avian influenza or H1N1 or H5N1 or H5N6 or IBV)              |
| 3  | #1 NOT #2                                                                                                                                                                                                                                                                                                                                                                      |
| 4  | TS=((pneumonia or covid* or coronavirus* or corona virus* or nCoV* or 2019-nCoV or sars* or virus) AND Wuhan)                                                                                                                                                                                                                                                                  |
| 5  | TS=(2019-nCoV* or 2019nCoV* or nCoV19 or nCoV-19 or 2019-novel CoV or sars-cov2* or sars-cov-2* or sarscov2* or sarscov-2* or Sars-coronavirus2 or Sars-coronavirus-2 or SARS-like coronavirus* or corona or coronavirus-19 or covid19 or covid-19 or covid 2019 or ((novel or new or nouveau) adj2 (CoV or nCoV or covid or coronavirus*)) or (coronavirus* and pneumonia) ). |
| 6  | TS=(COVID-19 or "severe acute respiratory syndrome coronavirus")                                                                                                                                                                                                                                                                                                               |
| 7  | #6 OR #5 OR #4 OR #3                                                                                                                                                                                                                                                                                                                                                           |
| 8  | TS=(antibod* or immunoglobulin* or immune globulin* or titer* or isotype* or IgG or IgM or IgA or neutralization or sera or serolog* or saliva or serum).                                                                                                                                                                                                                      |
| 9  | TS=("enzyme linked immunosorbent assay" or "enzyme-linked immunosorbent assay" or "immunoenzyme" or ELISA or "lateral flow immunoassay" or LFIA or "immunofluorescence assay" or immunochromatography or "complement fixation test" or "hemagglutination inhibition" or immunoblot or "western blot" or "neutralization assay")                                                |
| 10 | #9 OR #8                                                                                                                                                                                                                                                                                                                                                                       |
| 11 | TI=(seroconversion or seroprevalence or seroincidence or seroepidemiolog* or incidence or prevalence or asymptomatic or sero-survey*) or AK=(seroconversion or seroprevalence or seroincidence or seroepidemiolog* or incidence or prevalence or asymptomatic or sero-survey*)                                                                                                 |
| 12 | ALL=(prevalence or incidence or seroconversion or seroconvert or seroprevalence or seroincidence or seroepidemiolog* or serosurvey or sero-survey or survey or screen* or diagnostic test)                                                                                                                                                                                     |
| 13 | #12 AND #10 AND #7                                                                                                                                                                                                                                                                                                                                                             |
| 14 | #11 AND #7                                                                                                                                                                                                                                                                                                                                                                     |
| 15 | TI=(antibod* or immunoglobulin* or immune globulin* or titer* or isotype* or IgG or IgM or IgA or neutralization or sera or serolog* or saliva or serum).                                                                                                                                                                                                                      |
| 16 | #15 AND #7                                                                                                                                                                                                                                                                                                                                                                     |
| 17 | #16 OR #14 OR #13                                                                                                                                                                                                                                                                                                                                                              |

Database: Europe PMC [Secondary search for pre-prints]

Dates: January 1, 2020 to December 31, 2020

| # | Searches                                                                                                                                                                                                                                                                                                                                                                                                                                                                              |
|---|---------------------------------------------------------------------------------------------------------------------------------------------------------------------------------------------------------------------------------------------------------------------------------------------------------------------------------------------------------------------------------------------------------------------------------------------------------------------------------------|
|   | ("2019-nCoV" OR "2019nCoV" OR "COVID-19" OR "SARS-CoV-2" OR "COVID19" OR "COVID" OR "SARS-nCoV" OR ("wuhan" AND "coronavirus") OR "Coronavirus" OR "Corona virus" OR "corona-virus" OR "corona viruses" OR "coronaviruses" OR "SARS-CoV" OR "Severe Acute Respiratory Syndrome Coronavirus" OR ("SARS" AND "coronavirus")) AND ABSTRACT:(sera* OR sero* OR immun* OR Ig* OR "enzyme-linked immunosorbent assay" OR ELISA OR "neutralization assay" OR seroprevalence) AND (SRC:"PPR") |

**Sources: Health organizations**

Dates: January 1, 2020 to December 31, 2020

| Source                                                   | Search strategy |                                                                   |
|----------------------------------------------------------|-----------------|-------------------------------------------------------------------|
| WHO Situation Reports                                    | 1               | "antibod", "sero", "immun", "ELISA"                               |
| National Institutes of Health                            | 1               | ("COVID" OR "SARS-CoV-2")                                         |
|                                                          | 2               | ("sero*" OR "antibod*" OR "immun*" OR "RDT" OR "ELISA" OR "LFIA") |
|                                                          | 3               | allintext:(1 AND 2) site:nih.gov -site:ncbi.nlm.nih.gov           |
|                                                          | 3               | 2 AND 3                                                           |
| United States Centres for Disease Control and Prevention | 1               | ("COVID" OR "SARS-CoV-2")                                         |
|                                                          | 2               | ("sero*" OR "antibod*" OR "immun*" OR "RDT" OR "ELISA" OR "LFIA") |
|                                                          | 3               | allintext:(1 AND 2) site:cdc.gov                                  |
|                                                          | 5               | 2 AND 3                                                           |
| European Centres for Disease Control and Prevention      | 1               | ("COVID" OR "SARS-CoV-2")                                         |
|                                                          | 2               | ("sero*" OR "antibod*" OR "immun*" OR "RDT" OR "ELISA" OR "LFIA") |
|                                                          | 3               | allintext:(1 AND 2) site:ecdc.europa.eu                           |
|                                                          | 5               | 2 AND 3                                                           |

**Sources: Google News**

Dates: January 1, 2020 to December 31, 2020

| Source      | Search strategy |                                                                                                                                                                                               |
|-------------|-----------------|-----------------------------------------------------------------------------------------------------------------------------------------------------------------------------------------------|
| Google news | 1               | (antibody OR antibodies OR surveillance OR screen OR serology OR serological OR serosurvey OR ELISA OR LFIA OR assay OR blood OR serum OR immune OR immunity OR herd immunity OR random test) |

### S3. Detailed eligibility criteria

This study included eligible studies from the SeroTracker database. Eligibility criteria for the database and also for this review specifically are outlined below:

| Eligibility criteria for inclusion in SeroTracker database                                                                                                                 | Eligibility criteria for inclusion in this review                                                                                                                                                                                                                                                                                                                                                                                                                                       |
|----------------------------------------------------------------------------------------------------------------------------------------------------------------------------|-----------------------------------------------------------------------------------------------------------------------------------------------------------------------------------------------------------------------------------------------------------------------------------------------------------------------------------------------------------------------------------------------------------------------------------------------------------------------------------------|
| Study performed serologic testing to determine the prevalence of SARS-CoV-2 antibodies in a human population over a specified time period.                                 | Studies included in the SeroTracker database ( <a href="https://serotracker.com">https://serotracker.com</a> ) with relevant subgrouping (i.e., "Occupation," or "Employment status") and/or sample frame variables (i.e., "Healthcare workers and caregivers," "Non-essential workers and unemployed persons," "Essential non-healthcare workers," or "Multiple populations") variables. We also manually searched for potentially relevant studies not falling into these categories. |
| Reported sample size, sampling date, location and prevalence.                                                                                                              | Study published between January 01 and December 31, 2020.                                                                                                                                                                                                                                                                                                                                                                                                                               |
| Article in English or French or could be fully extracted using machine translation.                                                                                        | Article written in English or French or machine-translatable using Google Translate.                                                                                                                                                                                                                                                                                                                                                                                                    |
| Article did not report identical information to previously included studies (peer-reviewed studies were prioritised over news stories and pre-prints where available).     | Reported seroprevalence data that could be fit into the 23 major SOC 2010 occupation categories or combined categories for healthcare workers, first-responders or unemployed persons.<br><br>Studies that only reported seroprevalence for mixed occupation groups or workplaces rather than specific occupations (e.g., "hospital staff") were excluded.                                                                                                                              |
| Studies conducted only in people previously diagnosed with COVID-19 (molecular or antigen testing, or clinical or self-assessment).                                        | Seroprevalence estimates did not include people <18 years (i.e., possibly affected by COVID-19 exposure at school, which could impact occupational seroprevalence estimates).                                                                                                                                                                                                                                                                                                           |
| Cohort or cross-sectional design (case reports, case-control studies, trials, and reviews were excluded, as were dashboards not associated with a defined serology study). |                                                                                                                                                                                                                                                                                                                                                                                                                                                                                         |

## S4. Tool for assessing study risk of bias

| Item 1: Was the sample frame appropriate to address the target population? |                                                                                                                                                                                                                                                                                                                                                                                                                                                                                                                                                                                                                                                                                                                                                                                         |
|----------------------------------------------------------------------------|-----------------------------------------------------------------------------------------------------------------------------------------------------------------------------------------------------------------------------------------------------------------------------------------------------------------------------------------------------------------------------------------------------------------------------------------------------------------------------------------------------------------------------------------------------------------------------------------------------------------------------------------------------------------------------------------------------------------------------------------------------------------------------------------|
| Yes                                                                        | Sample frame described and it approximated the target population                                                                                                                                                                                                                                                                                                                                                                                                                                                                                                                                                                                                                                                                                                                        |
| No                                                                         | Sample frame did not approximate the target population (e.g., blood donors do not represent general population, doctors do not represent all health care providers)                                                                                                                                                                                                                                                                                                                                                                                                                                                                                                                                                                                                                     |
| Exclude                                                                    | Sample frame not described                                                                                                                                                                                                                                                                                                                                                                                                                                                                                                                                                                                                                                                                                                                                                              |
| *Notes                                                                     | The term “target population” should not be taken to infer every individual from everywhere or with similar disease or exposure characteristics. Instead, give consideration to specific population characteristics in the study, including age range, gender, morbidities, medications, and other potentially influential factors. For example, a sample frame may not be appropriate to address the target population if a certain group has been used (such as those working for one organisation, or one profession) and the results then inferred to the target population (i.e. working adults). A sample frame may be appropriate when it includes almost all the members of the target population (i.e. a census, or a complete list of participants or complete registry data). |

| Item 2: Were study participants recruited in an appropriate way? |                                                                                                            |
|------------------------------------------------------------------|------------------------------------------------------------------------------------------------------------|
| Yes                                                              | Probability sampling method (simple or stratified random) or entire sample (e.g., an entire town) was used |
| No                                                               | Non-probability sampling                                                                                   |
| Exclude                                                          | Sampling method not reported                                                                               |

| Item 3: Was the sample size adequate? |                                                                                                                                                                                                                                                                                                                                                                                                                                                                                                                                                                                                                                                                                                                                                                                                                                           |
|---------------------------------------|-------------------------------------------------------------------------------------------------------------------------------------------------------------------------------------------------------------------------------------------------------------------------------------------------------------------------------------------------------------------------------------------------------------------------------------------------------------------------------------------------------------------------------------------------------------------------------------------------------------------------------------------------------------------------------------------------------------------------------------------------------------------------------------------------------------------------------------------|
| Yes                                   | ≥599                                                                                                                                                                                                                                                                                                                                                                                                                                                                                                                                                                                                                                                                                                                                                                                                                                      |
| No                                    | <599                                                                                                                                                                                                                                                                                                                                                                                                                                                                                                                                                                                                                                                                                                                                                                                                                                      |
| Exclude                               | Sample size not reported                                                                                                                                                                                                                                                                                                                                                                                                                                                                                                                                                                                                                                                                                                                                                                                                                  |
| *Notes                                | <p>To calculate the required sample size we used an assumed prevalence of 2.5%, which was the global average estimated by the WHO in April, 2020.<sup>1</sup> Based on guidance by the Joanna Briggs Institute and published medical statistical recommendations we selected a precision value that was half the assumed prevalence (1.25%) [2,3]. We calculated a minimum sample size of 599 using these inputs:</p> <p>Sample size calculation: <math>n = \frac{Z^2 P(1-P)}{d^2}</math></p> <p>Where n = sample size;<br/> Z = Z statistic for level of confidence (95%);<br/> P = expected prevalence (2.5% WHO global estimate);<br/> d = precision (1.25%)</p> <p>In cases where the sample size calculation was provided and the required sample for 80% power was below our threshold (n&lt;599), this item was marked as yes.</p> |

| Item 4: Were the study subjects and setting described in detail? |                                                                                      |
|------------------------------------------------------------------|--------------------------------------------------------------------------------------|
| Yes                                                              | Average age and distribution of gender/sex provided                                  |
| No                                                               | Neither age or gender/sex is provided, or only one of age and gender/sex is provided |

| Item 5: Was data analysis conducted with sufficient coverage of the identified sample? |                                                                                                                                      |
|----------------------------------------------------------------------------------------|--------------------------------------------------------------------------------------------------------------------------------------|
| Yes                                                                                    | The demographic characteristics (gender/sex, age, and ethnicity) of the sample is at least somewhat representative of the population |
| No                                                                                     | The demographic characteristics (gender/sex, age, and ethnicity) of the sample is not representative of the population               |

|         |                                                                                                              |
|---------|--------------------------------------------------------------------------------------------------------------|
| Unclear | Information is not provided about demographic characteristics of the sample (gender/sex, age, and ethnicity) |
|---------|--------------------------------------------------------------------------------------------------------------|

|                                                                                 |                                                                                                                                                                                      |
|---------------------------------------------------------------------------------|--------------------------------------------------------------------------------------------------------------------------------------------------------------------------------------|
| <b>Item 6: Were valid methods used for the identification of the condition?</b> |                                                                                                                                                                                      |
| Yes                                                                             | The test used met the FDA standards for Emergency Use Authorizations for COVID-19 serological tests: sensitivity minimum 90%, specificity minimum 95%, as reported in the study [4]. |
| No                                                                              | The test used did not meet the FDA standards for Emergency Use Authorizations for COVID-19 serological tests: sensitivity minimum 90%, specificity minimum 95%.                      |
| Exclude                                                                         | Test sensitivity and specificity not reported                                                                                                                                        |

|                                                                                             |                                                                                 |
|---------------------------------------------------------------------------------------------|---------------------------------------------------------------------------------|
| <b>Item 7: Was the condition measured in a standard, reliable way for all participants?</b> |                                                                                 |
| Yes                                                                                         | The same serology test was used for all participants                            |
| No                                                                                          | Different serology tests were used for participants                             |
| Unclear                                                                                     | No details were provided about which participants received which serology tests |

|                                                            |                                                                                                                                                                                                                                                                                                                                                                                    |
|------------------------------------------------------------|------------------------------------------------------------------------------------------------------------------------------------------------------------------------------------------------------------------------------------------------------------------------------------------------------------------------------------------------------------------------------------|
| <b>Item 8: Was there appropriate statistical analysis?</b> |                                                                                                                                                                                                                                                                                                                                                                                    |
| Yes                                                        | Does all of the following: corrects for population characteristics or the sample is somewhat representative of the population (probability sampling), corrects for test characteristics), and provides the information necessary to determine the numerator, denominator, prevalence estimate, and confidence interval.                                                            |
| No                                                         | Does not correct for population characteristics and the sample is not likely representative of the population (non-probability sampling), does not correct for test or provide the information necessary to correct for test characteristics, or does not provide the information necessary to determine the numerator, denominator, prevalence estimate, and confidence interval. |

|                                                                                                             |                                                                                                                      |
|-------------------------------------------------------------------------------------------------------------|----------------------------------------------------------------------------------------------------------------------|
| <b>Item 9: Was the response rate adequate, and if not, was the low response rate managed appropriately?</b> |                                                                                                                      |
| Yes                                                                                                         | Response rate > 60% or the demographics of the sample were a reasonable match to those of the target population [5]  |
| No                                                                                                          | Response rate < 60% and the demographics of the sample were not a reasonable match to those of the target population |
| Unclear                                                                                                     | Response rate not provided and it was unclear if the demographics of the sample differed from the target population  |

|                                      |                                                                                                                                                                                                                                                                                                                                                                                                                                                                                                                                                                                                                                                                                                        |
|--------------------------------------|--------------------------------------------------------------------------------------------------------------------------------------------------------------------------------------------------------------------------------------------------------------------------------------------------------------------------------------------------------------------------------------------------------------------------------------------------------------------------------------------------------------------------------------------------------------------------------------------------------------------------------------------------------------------------------------------------------|
| <b>Item 10: Overall risk of bias</b> |                                                                                                                                                                                                                                                                                                                                                                                                                                                                                                                                                                                                                                                                                                        |
| Low                                  | The estimates are very likely correct for the target population. To obtain a low risk of bias classification, all criteria must be met or departures from the criteria must be minimal and unlikely to impact on the validity and reliability of the prevalence estimate. These include sample sizes that are just below the threshold when all other criteria are met, reporting only some of characteristics of the sample, test characteristics below the threshold but corrections for the test performance, and response rates that are just below the threshold in the context of probability based sampling of an appropriate sampling frame with population weighted seroprevalence estimates. |
| Moderate                             | The estimates are likely correct for the target population. To obtain a moderate risk of bias classification, most criteria must be met and departures from the criteria are likely to have only a small impact on the validity and reliability of the prevalence estimates.                                                                                                                                                                                                                                                                                                                                                                                                                           |
| High                                 | The estimates are not likely correct for the target population. To obtain a high risk of bias, many criteria must not be met or departures from criteria are likely to have a major impact on the validity and reliability of the prevalence estimates.                                                                                                                                                                                                                                                                                                                                                                                                                                                |
| Unclear                              | There was insufficient information to assess the risk of bias.                                                                                                                                                                                                                                                                                                                                                                                                                                                                                                                                                                                                                                         |

## S5. Details of occupational coding

For each seroprevalence estimate, we identified the relevant Standard Occupational Classification (SOC) 2010 codes. This was done by applying the National Institute for Occupational Safety & Health (NIOSH) Industry and Occupation Computerized Coding System (NIOCCS) to text occupation descriptions extracted by members of the research team. There is no standard cut-off for manually verifying results from the National Institute for Occupational Safety & Health (NIOSH) Industry and Occupation Computerized Coding System (NIOCCS). However, NIOCCS reports the probability of correct classification to the six-digit level. After manually verifying a subset of records from the first round of classification, we decided to manually perform a second round of classification for any observations for which the probability of correct classification was  $<0.8$ . This cut-off was chosen based on the observation that most codes with a probability of correct classification to of  $\geq 0.8$  to the six-digit level were correctly coded at the two- and three-digit level, which we used in our main analyses and are more likely to be coded correctly than the more granular, 6-digit codes and consideration of the number of records that could feasibly be verified manually

1  
2  
3  
4 **16** **References for supplementary files**

- 5 17  
6 18 1. Boseley S. WHO warns that few have developed antibodies to Covid-19. The Guardian [Internet]. 2020 Apr 20;  
7 19 Available from: [https://www.theguardian.com/society/2020/apr/20/studies-suggest-very-few-have-had-covid-19-](https://www.theguardian.com/society/2020/apr/20/studies-suggest-very-few-have-had-covid-19-without-symptoms)  
8 20 without-symptoms  
9 21 2. Munn Z, Moola S, Lisy K, Riitano D, Tufanaru C. Methodological guidance for systematic reviews of observational  
10 22 epidemiological studies reporting prevalence and cumulative incidence data. *Int J Evid Based Healthc*. 2015  
11 23 Sep;13(3):147–53.  
12 24 3. Naing L, Winn T, Ruslil B. Practical issues in calculating the sample size for prevalence studies. *Arch Orofac Sci*.  
13 25 2006;1:9–14.  
14 26 4. U.S. Food & Drug Administration. Emergency Use Authorization for SARS-CoV-2 Antibody Tests [Internet]. 2020  
15 27 [cited 2020 May 5]. Available from: <https://www.fda.gov/media/137470/download>.  
16 28 5. Morton MBS, Bandara DK, Robinson EM, Carr PEA. In the 21<sup>st</sup> century, what is an acceptable response rate?  
17 29 *Aust N Z J Public Health*. 2012 April; 36 (2): 106-8.  
18 30 6. Bobrovitz N, Arora RK, Cao C, Boucher E, Liu M, Donnici C, Yanes-Lane M, Whelan M, Perlman-Arrow S, Chen J,  
19 31 Rahim H. Global seroprevalence of SARS-CoV-2 antibodies: A systematic review and meta-analysis. *PloS one*. 2021  
20 32 Jun 23;16(6):e0252617.



1  
2 33  
3  
4  
5  
6  
7  
8  
9  
10  
11  
12  
13  
14  
15  
16  
17  
18  
19  
20  
21  
22  
23  
24  
25  
26  
27  
28  
29  
30  
31  
32  
33  
34  
35  
36  
37  
38  
39  
40  
41  
42  
43  
44  
45  
46  
47  
48  
49  
50  
51  
52  
53  
54  
55  
56  
57  
58  
59  
60

For peer review only

**Supplementary File I.** List of all estimates, included studies and references

| SOC 2010 Major Group  | Study                              | N      | SOC 2010 Occupation Title | Study Type                                                                        | Study Dates   | Country                  | Serum positive prevalence (95% CIs) | Overall Risk of Bias (JBI) |
|-----------------------|------------------------------------|--------|---------------------------|-----------------------------------------------------------------------------------|---------------|--------------------------|-------------------------------------|----------------------------|
| Not employed (mixed)* | Merkely et al., 2020 <sup>1</sup>  | n=209  | Homemaker (Unpaid)        | Cross-sectional survey                                                            | 05/01 - 05/16 | Hungary                  | 0.73% (0-1.74%)                     | Moderate                   |
| Not employed (mixed)* | Siddiqui et al., 2020 <sup>2</sup> | n=37   | Homemaker (Unpaid)        | Prospective cohort                                                                | 04/15 - 08/15 | India                    | 18.9%                               | High                       |
| Not employed (mixed)* | Biggs et al., 2020 <sup>3</sup>    | n=157  | Retired (Unpaid)          | Cross-sectional survey                                                            | 04/28 - 05/03 | United States of America | 1.91%                               | Moderate                   |
| Not employed (mixed)* | Carrat et al., 2020 <sup>4</sup>   | n=5381 | Retired (Unpaid)          | Prospective cohort                                                                | 05/04 - 06/23 | France                   | 4.3% (3.5-5%)                       | Moderate                   |
| Not employed (mixed)* | Merkely et al., 2020 <sup>1</sup>  | n=2767 | Retired (Unpaid)          | Cross-sectional survey                                                            | 05/01 - 05/16 | Hungary                  | 1.09% (0.66-1.52%)                  | Moderate                   |
| Not employed (mixed)* | Richard et al., 2020 <sup>5</sup>  | n=1635 | Retired (Unpaid)          | Cross-sectional survey                                                            | 04/06 - 06/30 | Switzerland              | 4.3%                                | Low                        |
| Not employed (mixed)* | Siddiqui et al., 2020 <sup>2</sup> | n=10   | Retired (Unpaid)          | Prospective cohort                                                                | 04/15 - 08/15 | India                    | 20%                                 | High                       |
| Not employed (mixed)* | Alemu et al., 2020 <sup>6</sup>    | n=32   | Student (Unpaid)          | Cross-sectional survey                                                            | 04/23 - 04/28 | Ethiopia                 | 15.6%                               | Moderate                   |
| Not employed (mixed)* | Biggs et al., 2020 <sup>3</sup>    | n=16   | Student (Unpaid)          | Cross-sectional survey                                                            | 04/28 - 05/03 | United States of America | 12.5%                               | Moderate                   |
| Not employed (mixed)* | Brehm et al., 2020 <sup>7</sup>    | n=73   | Student (Unpaid)          | Cross sectional study with prospective cohort follow up of a subset of the sample | 03/20 - 07/17 | Germany                  | 2.7%                                | Moderate                   |
| Not employed (mixed)* | Carrat et al., 2020 <sup>4</sup>   | n=81   | Student (Unpaid)          | Prospective cohort                                                                | 05/04 - 06/23 | France                   | 7.2% (0.1-12.6%)                    | Moderate                   |

|                                  |                                        |        |                                                    |                        |               |                            |                    |          |
|----------------------------------|----------------------------------------|--------|----------------------------------------------------|------------------------|---------------|----------------------------|--------------------|----------|
| Not employed (mixed)*            | Iversen et al., 2020 <sup>8</sup>      | n=688  | Student (Unpaid)                                   | Cross-sectional survey | 04/15 - 04/22 | Denmark                    | 14.97%             | Low      |
| Not employed (mixed)*            | Lumley et al., 2020 <sup>9</sup>       | n=620  | Student (Unpaid)                                   | Prospective cohort     | 04/23 - 11/30 | The United Kingdom         | 6.77%              | Moderate |
| Not employed (mixed)*            | Merkely et al., 2020 <sup>1</sup>      | n=774  | Student (Unpaid)                                   | Cross-sectional survey | 05/01 - 05/16 | Hungary                    | 0.69% (0-1.49%)    | Moderate |
| Not employed (mixed)*            | Richard et al., 2020 <sup>5</sup>      | n=666  | Student (Unpaid)                                   | Cross-sectional survey | 04/06 - 06/30 | Switzerland                | 10.5%              | Low      |
| Not employed (mixed)*            | Shakiba et al., 2020 <sup>10</sup>     | n=114  | Student (Unpaid)                                   | Cross-sectional survey | 04/11 - 04/19 | Iran (Islamic Republic of) | 17.5% (11.3-23.7%) | Moderate |
| Not employed (mixed)*            | Siddiqui et al., 2020 <sup>2</sup>     | n=14   | Student (Unpaid)                                   | Prospective cohort     | 04/15 - 08/15 | India                      | 21.4%              | High     |
| Not employed (mixed)*            | Tilley et al., 2020 <sup>11</sup>      | n=790  | Student (Unpaid)                                   | Cross-sectional survey | 04/29 - 05/08 | United States of America   | 4% (3-5.1%)        | Moderate |
| Not employed (mixed)*            | Tsitsilonis et al., 2020 <sup>12</sup> | n=1395 | Student (Unpaid)                                   | Cross-sectional survey | 06/15 - 07/15 | Greece                     | 0.42% (0.03-1.5%)  | Moderate |
| Not employed (mixed)*            | Arnaldo et al., 2020 <sup>13</sup>     | n=513  | Military, Rank Not Specified                       | Cross-sectional survey | 07/06 - 07/13 | Mozambique                 | 3.7%               | High     |
| Not employed (mixed)*            | Arnaldo et al., 2020 <sup>14</sup>     | n=116  | Military, Rank Not Specified                       | Cross-sectional survey | 11/02 - 11/12 | Mozambique                 | 1.7%               | High     |
| Not employed (mixed)*            | Mabunda et al., 2020 <sup>15</sup>     | n=324  | Military, Rank Not Specified                       | Cross-sectional survey | 09/21 - 10/02 | Mozambique                 | 2.8%               | High     |
| Not employed (mixed)*            | Mahomed et al., 2020 <sup>16</sup>     | n=116  | Military, Rank Not Specified                       | Cross-sectional survey | 11/26 - 12/03 | Mozambique                 | 18.1%              | High     |
| Not employed (mixed)*            | Payne et al., 2020 <sup>17</sup>       | n=382  | Military, Rank Not Specified                       | Cross-sectional survey | 04/20 - 04/24 | United States of America   | 59.7%              | High     |
| Not employed (mixed)*            | World et al., 2020 <sup>18</sup>       | n=6900 | Military, Rank Not Specified                       | Cross-sectional survey | 08/15 - 10/15 | Republic of Korea          | 0.36%              | Unclear  |
| Management Occupations (11-0000) | Shakiba et al., 2020 <sup>10</sup>     | n=16   | Farmers, Ranchers, and Other Agricultural Managers | Cross-sectional survey | 04/11 - 04/19 | Iran (Islamic Republic of) | 19.7% (9.1-31%)    | Moderate |
| Management Occupations (11-      | Favara et al., 2020 <sup>19</sup>      | n=43   | Medical and Health Services Managers               | Cross-sectional survey | 07/13 - 07/13 | The United Kingdom         | 9.3%               | High     |

|                                                         |                                     |        |                                      |                                                                                   |               |                            |                    |          |
|---------------------------------------------------------|-------------------------------------|--------|--------------------------------------|-----------------------------------------------------------------------------------|---------------|----------------------------|--------------------|----------|
| 0000)                                                   |                                     |        |                                      |                                                                                   |               |                            |                    |          |
| Management Occupations (11-0000)                        | Galan et al., 2020 <sup>20</sup>    | n=170  | Medical and Health Services Managers | Cross-sectional survey                                                            | 04/14 - 04/27 | Spain                      | 27.6%              | High     |
| Management Occupations (11-0000)                        | Hunter et al., 2020 <sup>21</sup>   | n=44   | Medical and Health Services Managers | Cross-sectional survey                                                            | 04/29 - 05/08 | United States of America   | 4.55%              | High     |
| Management Occupations (11-0000)                        | Leidner et al., 2020 <sup>22</sup>  | n=257  | Medical and Health Services Managers | Cross sectional study with prospective cohort follow up of a subset of the sample | 04/08 - 05/22 | United States of America   | 3.11%              | High     |
| Management Occupations (11-0000)                        | Martin et al., 2020 <sup>23</sup>   | n=2078 | Medical and Health Services Managers | Cross-sectional survey                                                            | 05/29 - 07/13 | The United Kingdom         | 6.79%              | Moderate |
| Management Occupations (11-0000)                        | Siddiqui et al., 2020 <sup>2</sup>  | n=15   | Medical and Health Services Managers | Prospective cohort                                                                | 04/15 - 08/15 | India                      | 20%                | High     |
| Management Occupations (11-0000)                        | Baracco et al., 2020 <sup>24</sup>  | n=45   | Managers, All Other                  | Cross-sectional survey                                                            | 04/23 - 05/05 | Italy                      | 6.67%              | High     |
| Management Occupations (11-0000)                        | Goenka et al., 2020 <sup>25</sup>   | n=71   | Managers, All Other                  | Cross-sectional survey                                                            | 07/12 - 08/23 | India                      | 7.04%              | Moderate |
| Management Occupations (11-0000)                        | Goenka et al., 2020 <sup>26</sup>   | n=13   | Managers, All Other                  | Cross-sectional survey                                                            | 08/01 - 08/31 | India                      | 38.46%             | High     |
| Business and Financial Operations Occupations (13-0000) | Satpati et al., 2020 <sup>27</sup>  | n=43   | Management Analysts                  | Cross-sectional survey                                                            | 07/26 - 08/08 | India                      | 2.33%              | Moderate |
| Business and Financial                                  | Poustchi et al., 2020 <sup>28</sup> | n=880  | Financial Specialists                | Cross-sectional survey                                                            | 04/17 - 06/02 | Iran (Islamic Republic of) | 14.2% (12.1-16.5%) | Moderate |

|                                                          |                                    |        |                                            |                                                                                   |               |                          |       |          |
|----------------------------------------------------------|------------------------------------|--------|--------------------------------------------|-----------------------------------------------------------------------------------|---------------|--------------------------|-------|----------|
| Operations Occupations (13-0000)                         |                                    |        |                                            |                                                                                   |               |                          |       |          |
| Computer and Mathematical Occupations (15-0000)          | Biggs et al., 2020 <sup>3</sup>    | n=47   | Computer User Support Specialists          | Cross-sectional survey                                                            | 04/28 - 05/03 | United States of America | 0%    | Moderate |
| Architecture and Engineering Occupations (17-0000)       | Siddiqui et al., 2020 <sup>2</sup> | n=21   | Engineers                                  | Prospective cohort                                                                | 04/15 - 08/15 | India                    | 42.9% | High     |
| Life, Physical, and Social Science Occupations (19-0000) | Jones et al., 2020 <sup>29</sup>   | n=245  | Medical Scientists                         | Cross-sectional survey                                                            | 01/15 - 06/15 | The United Kingdom       | 1.9%  | High     |
| Life, Physical, and Social Science Occupations (19-0000) | Anna et al., 2020 <sup>30</sup>    | n=505  | Medical Scientists, Except Epidemiologists | Prospective cohort                                                                | 04/28 - 07/31 | France                   | 8.71% | Moderate |
| Life, Physical, and Social Science Occupations (19-0000) | Erber et al., 2020 <sup>31</sup>   | n=635  | Medical Scientists, Except Epidemiologists | Cross-sectional survey                                                            | 04/14 - 05/29 | Germany                  | 1.24% | High     |
| Life, Physical, and Social Science Occupations (19-0000) | Favara et al., 2020 <sup>19</sup>  | n=38   | Medical Scientists, Except Epidemiologists | Cross-sectional survey                                                            | 07/13 - 07/13 | The United Kingdom       | 2.6%  | High     |
| Life, Physical, and Social Science Occupations (19-0000) | Hanrath et al., 2020 <sup>32</sup> | n=468  | Medical Scientists, Except Epidemiologists | Cross-sectional survey                                                            | 05/29 - 07/06 | The United Kingdom       | 6.2%  | High     |
| Life, Physical, and Social Science Occupations (19-0000) | Leidner et al., 2020 <sup>22</sup> | n=2654 | Medical Scientists, Except Epidemiologists | Cross sectional study with prospective cohort follow up of a subset of the sample | 04/08 - 05/22 | United States of America | 2.22% | High     |

|                                                          |                                        |        |                                            |                                                                                   |               |                          |                 |          |
|----------------------------------------------------------|----------------------------------------|--------|--------------------------------------------|-----------------------------------------------------------------------------------|---------------|--------------------------|-----------------|----------|
| Life, Physical, and Social Science Occupations (19-0000) | Martin et al., 2020 <sup>23</sup>      | n=1154 | Medical Scientists, Except Epidemiologists | Cross-sectional survey                                                            | 05/29 - 07/13 | The United Kingdom       | 9.71%           | Moderate |
| Life, Physical, and Social Science Occupations (19-0000) | Rosser et al., 2020 <sup>33</sup>      | n=102  | Medical Scientists, Except Epidemiologists | Cross-sectional survey                                                            | 04/20 - 05/20 | United States of America | 0.98%           | High     |
| Life, Physical, and Social Science Occupations (19-0000) | Silva et al., 2020 <sup>34</sup>       | n=69   | Chemists                                   | Cross-sectional survey                                                            | 06/05 - 07/31 | Brazil                   | 4%              | High     |
| Life, Physical, and Social Science Occupations (19-0000) | Tsitsilonis et al., 2020 <sup>12</sup> | n=250  | Physical Scientists, All Other             | Cross-sectional survey                                                            | 06/15 - 07/15 | Greece                   | 1.42% (0-7.24%) | Moderate |
| Community and Social Service Occupations (21-0000)       | Jones et al., 2020 <sup>29</sup>       | n=211  | Healthcare Social Workers                  | Cross-sectional survey                                                            | 01/15 - 06/15 | The United Kingdom       | 6.3%            | High     |
| Community and Social Service Occupations (21-0000)       | Leidner et al., 2020 <sup>22</sup>     | n=235  | Social Workers, All Other                  | Cross sectional study with prospective cohort follow up of a subset of the sample | 04/08 - 05/22 | United States of America | 3.4%            | High     |
| Community and Social Service Occupations (21-0000)       | Rosser et al., 2020 <sup>33</sup>      | n=117  | Social Workers, All Other                  | Cross-sectional survey                                                            | 04/20 - 05/20 | United States of America | 1.71%           | High     |
| Community and Social Service Occupations (21-0000)       | Sabourin et al., 2020 <sup>35</sup>    | n=91   | Social Workers, All Other                  | Cross-sectional survey                                                            | 07/15 - 08/15 | United States of America | 5.49%           | High     |
| Community and Social Service                             | Yogo et al., 2020 <sup>36</sup>        | n=35   | Social Workers, All Other                  | Cross-sectional survey                                                            | 05/20 - 06/08 | United States of America | 0%              | High     |

|                                                        |                                        |        |                                       |                        |               |                          |                    |          |
|--------------------------------------------------------|----------------------------------------|--------|---------------------------------------|------------------------|---------------|--------------------------|--------------------|----------|
| Occupations (21-0000)                                  |                                        |        |                                       |                        |               |                          |                    |          |
| Community and Social Service Occupations (21-0000)     | Biggs et al., 2020 <sup>3</sup>        | n=6    | Religious Workers                     | Cross-sectional survey | 04/28 - 05/03 | United States of America | 16.67%             | Moderate |
| Education, Training, and Library Occupations (25-0000) | Campos et al., 2020 <sup>37</sup>      | n=2715 | Postsecondary Teachers                | Cross-sectional survey | 05/13 - 07/10 | Portugal                 | 2.6%               | High     |
| Education, Training, and Library Occupations (25-0000) | Goncalves et al., 2020 <sup>38</sup>   | n=1636 | Postsecondary Teachers                | Cross-sectional survey | 06/15 - 06/30 | Portugal                 | 3.05%              | Moderate |
| Education, Training, and Library Occupations (25-0000) | Tsitsilonis et al., 2020 <sup>12</sup> | n=312  | Postsecondary Teachers                | Cross-sectional survey | 06/15 - 07/15 | Greece                   | 1.2% (0.14-3.7%)   | Moderate |
| Education, Training, and Library Occupations (25-0000) | Fontanet et al., 2020 <sup>39</sup>    | n=42   | Elementary and Middle School Teachers | Retrospective cohort   | 04/28 - 04/30 | France                   | 7.1%               | Moderate |
| Education, Training, and Library Occupations (25-0000) | Siddiqui et al., 2020 <sup>2</sup>     | n=8    | Elementary and Middle School Teachers | Prospective cohort     | 04/15 - 08/15 | India                    | 25%                | High     |
| Education, Training, and Library Occupations (25-0000) | Torres et al., 2020 <sup>40</sup>      | n=165  | Elementary and Middle School Teachers | Cross-sectional survey | 05/04 - 05/19 | Chile                    | 20.6% (14.7-27.6%) | High     |

|                                  |                                                                      |                                     |        |                                                               |                        |               |                          |                    |          |
|----------------------------------|----------------------------------------------------------------------|-------------------------------------|--------|---------------------------------------------------------------|------------------------|---------------|--------------------------|--------------------|----------|
| 1<br>2<br>3<br>4<br>5<br>6<br>7  | Arts, Design, Entertainment, Sports, and Media Occupations (27-0000) | Halatoko et al., 2020 <sup>41</sup> | n=55   | Fine Artists, Including Painters, Sculptors, and Illustrators | Cross-sectional survey | 04/23 - 05/08 | Togo                     | 0%                 | High     |
| 8<br>9<br>10<br>11<br>12<br>13   | Arts, Design, Entertainment, Sports, and Media Occupations (27-0000) | Slusser et al., 2020 <sup>42</sup>  | n=5603 | Athletes, Coaches, Umpires, and Related Workers               | Cross-sectional survey | 04/08 - 04/21 | United States of America | 0.7% (0.28-1.15%)  | Unclear  |
| 14<br>15<br>16<br>17<br>18       | Arts, Design, Entertainment, Sports, and Media Occupations (27-0000) | Vince et al., 2020 <sup>43</sup>    | n=272  | Athletes, Coaches, Umpires, and Related Workers               | Prospective cohort     | 05/29 - 07/31 | Croatia                  | 14%                | Moderate |
| 19<br>20<br>21<br>22<br>23       | Arts, Design, Entertainment, Sports, and Media Occupations (27-0000) | Vince et al., 2020 <sup>43</sup>    | n=43   | Coaches and Scouts                                            | Prospective cohort     | 05/29 - 07/31 | Croatia                  | 16.3%              | Moderate |
| 24<br>25<br>26<br>27<br>28       | Arts, Design, Entertainment, Sports, and Media Occupations (27-0000) | Mack et al., 2020 <sup>44</sup>     | n=1007 | Umpires, Referees, and Other Sports Officials                 | Prospective cohort     | 06/16 - 06/30 | Germany                  | 2.09% (1.37-3.17%) | High     |
| 29<br>30<br>31<br>32<br>33       | Arts, Design, Entertainment, Sports, and Media Occupations (27-0000) | Khan et al., 2020 <sup>45</sup>     | n=44   | Media and Communication Workers                               | Cross-sectional survey | 07/01 - 07/15 | India                    | 0%                 | Moderate |
| 34<br>35<br>36<br>37<br>38<br>39 | Healthcare Practitioners and Technical Occupations (29-0000)         | Akinbami et al., 2020 <sup>46</sup> | n=566  | Healthcare Practitioners and Technical Occupations            | Cross-sectional survey | 05/18 - 06/13 | United States of America | 4.6% (3-6.7%)      | Moderate |

40  
41  
42  
43  
44  
45  
46  
47



|                                                              |                                     |       |                                                                                        |                                                                                   |               |                          |               |          |
|--------------------------------------------------------------|-------------------------------------|-------|----------------------------------------------------------------------------------------|-----------------------------------------------------------------------------------|---------------|--------------------------|---------------|----------|
| Healthcare Practitioners and Technical Occupations (29-0000) | Khan et al., 2020 <sup>45</sup>     | n=355 | Healthcare Practitioners and Technical Occupations                                     | Cross-sectional survey                                                            | 07/01 - 07/15 | India                    | 4.8% (3-7.6%) | Moderate |
| Healthcare Practitioners and Technical Occupations (29-0000) | Leidner et al., 2020 <sup>22</sup>  | n=402 | Healthcare Practitioners and Technical Occupations                                     | Cross sectional study with prospective cohort follow up of a subset of the sample | 04/08 - 05/22 | United States of America | 1.49%         | High     |
| Healthcare Occupations (mixed)*                              | Hanrath et al., 2020 <sup>32</sup>  | n=102 | Healthcare Practitioners and Technical Occupations and Healthcare Support Occupations* | Cross-sectional survey                                                            | 05/29 - 07/06 | The United Kingdom       | 6.62%         | High     |
| Healthcare Occupations (mixed)*                              | Jones et al., 2020 <sup>29</sup>    | n=413 | Healthcare Practitioners and Technical Occupations and Healthcare Support Occupations* | Cross-sectional survey                                                            | 01/15 - 06/15 | The United Kingdom       | 7.8%          | High     |
| Healthcare Occupations (mixed)*                              | Martin et al., 2020 <sup>23</sup>   | n=550 | Healthcare Practitioners and Technical Occupations and Healthcare Support Occupations* | Cross-sectional survey                                                            | 05/29 - 07/13 | The United Kingdom       | 10.36%        | Moderate |
| Healthcare Occupations (mixed)*                              | Amendola et al., 2020 <sup>47</sup> | n=117 | Healthcare Practitioners and Technical Occupations and Healthcare Support Occupations* | Cross-sectional survey                                                            | 04/15 - 04/15 | Italy                    | 4.27%         | High     |
| Healthcare Occupations (mixed)*                              | Arnaldo et al., 2020 <sup>48</sup>  | n=543 | Healthcare Practitioners and Technical Occupations and Healthcare Support Occupations* | Cross-sectional survey                                                            | 08/10 - 08/21 | Mozambique               | 3.7%          | High     |

|                                 |                                     |       |                                                                                        |                        |               |                          |        |          |
|---------------------------------|-------------------------------------|-------|----------------------------------------------------------------------------------------|------------------------|---------------|--------------------------|--------|----------|
| Healthcare Occupations (mixed)* | Bal et al., 2020 <sup>49</sup>      | n=190 | Healthcare Practitioners and Technical Occupations and Healthcare Support Occupations* | Cross-sectional survey | 04/10 - 05/28 | France                   | 3.68%  | High     |
| Healthcare Occupations (mixed)* | Barallat et al., 2020 <sup>50</sup> | n=429 | Healthcare Practitioners and Technical Occupations and Healthcare Support Occupations* | Cross-sectional survey | 05/04 - 05/22 | Spain                    | 7.69%  | High     |
| Healthcare Occupations (mixed)* | Bardai et al., 2020 <sup>51</sup>   | n=35  | Healthcare Practitioners and Technical Occupations and Healthcare Support Occupations* | Cross-sectional survey | 06/10 - 07/27 | Canada                   | 11%    | High     |
| Healthcare Occupations (mixed)* | Bardai et al., 2020 <sup>51</sup>   | n=20  | Healthcare Practitioners and Technical Occupations and Healthcare Support Occupations* | Cross-sectional survey | 06/10 - 07/27 | Canada                   | 15%    | High     |
| Healthcare Occupations (mixed)* | Bardai et al., 2020 <sup>51</sup>   | n=44  | Healthcare Practitioners and Technical Occupations and Healthcare Support Occupations* | Cross-sectional survey | 06/10 - 07/27 | Canada                   | 11%    | High     |
| Healthcare Occupations (mixed)* | Bardai et al., 2020 <sup>51</sup>   | n=99  | Healthcare Practitioners and Technical Occupations and Healthcare Support Occupations* | Cross-sectional survey | 06/10 - 07/27 | Canada                   | 12%    | High     |
| Healthcare Occupations (mixed)* | Biggs et al., 2020 <sup>3</sup>     | n=59  | Healthcare Practitioners and Technical Occupations and Healthcare Support Occupations* | Cross-sectional survey | 04/28 - 05/03 | United States of America | 10.17% | Moderate |

|                                 |                                    |         |                                                                                        |                        |               |                          |                   |          |
|---------------------------------|------------------------------------|---------|----------------------------------------------------------------------------------------|------------------------|---------------|--------------------------|-------------------|----------|
| Healthcare Occupations (mixed)* | Blairon et al., 2020 <sup>52</sup> | n=588   | Healthcare Practitioners and Technical Occupations and Healthcare Support Occupations* | Cross-sectional survey | 05/25 - 06/19 | Belgium                  | 19.2%             | High     |
| Healthcare Occupations (mixed)* | Borraz et al., 2020 <sup>53</sup>  | n=289   | Healthcare Practitioners and Technical Occupations and Healthcare Support Occupations* | Prospective cohort     | 03/20 - 04/21 | Spain                    | 5.88%             | High     |
| Healthcare Occupations (mixed)* | Brunner et al., 2020 <sup>54</sup> | n=762   | Healthcare Practitioners and Technical Occupations and Healthcare Support Occupations* | Cross-sectional survey | 05/04 - 05/29 | United States of America | 4.5%              | High     |
| Healthcare Occupations (mixed)* | Brunner et al., 2020 <sup>54</sup> | n=764   | Healthcare Practitioners and Technical Occupations and Healthcare Support Occupations* | Cross-sectional survey | 05/04 - 05/29 | United States of America | 2%                | High     |
| Healthcare Occupations (mixed)* | Carozzi et al., 2020 <sup>55</sup> | n=17098 | Healthcare Practitioners and Technical Occupations and Healthcare Support Occupations* | Cross-sectional survey | 04/01 - 04/30 | Italy                    | 3.1%              | High     |
| Healthcare Occupations (mixed)* | Carrat et al., 2020 <sup>4</sup>   | n=568   | Healthcare Practitioners and Technical Occupations and Healthcare Support Occupations* | Prospective cohort     | 05/04 - 06/23 | France                   | 11.6% (8.3-14.4%) | Moderate |
| Healthcare Occupations (mixed)* | Cavlek et al., 2020 <sup>56</sup>  | n=558   | Healthcare Practitioners and Technical Occupations and Healthcare Support Occupations* | Cross-sectional survey | 04/25 - 05/24 | Croatia                  | 1.25%             | High     |

|                                 |                                     |        |                                                                                        |                        |               |                          |                   |          |
|---------------------------------|-------------------------------------|--------|----------------------------------------------------------------------------------------|------------------------|---------------|--------------------------|-------------------|----------|
| Healthcare Occupations (mixed)* | Chibwana et al., 2020 <sup>57</sup> | n=500  | Healthcare Practitioners and Technical Occupations and Healthcare Support Occupations* | Prospective cohort     | 05/22 - 06/19 | Malawi                   | 12.3% (8.2-16.5%) | High     |
| Healthcare Occupations (mixed)* | Coffman et al., 2020 <sup>58</sup>  | n=1100 | Healthcare Practitioners and Technical Occupations and Healthcare Support Occupations* | Cross-sectional survey | 07/01 - 07/31 | United States of America | 2.2%              | Unclear  |
| Healthcare Occupations (mixed)* | Cooper et al., 2020 <sup>59</sup>   | n=118  | Healthcare Practitioners and Technical Occupations and Healthcare Support Occupations* | Cross-sectional survey | 06/10 - 08/07 | The United Kingdom       | 8.47%             | Moderate |
| Healthcare Occupations (mixed)* | Cooper et al., 2020 <sup>59</sup>   | n=27   | Healthcare Practitioners and Technical Occupations and Healthcare Support Occupations* | Cross-sectional survey | 06/10 - 08/07 | The United Kingdom       | 14.81%            | Moderate |
| Healthcare Occupations (mixed)* | Cooper et al., 2020 <sup>59</sup>   | n=24   | Healthcare Practitioners and Technical Occupations and Healthcare Support Occupations* | Cross-sectional survey | 06/10 - 08/07 | The United Kingdom       | 12.5%             | Moderate |
| Healthcare Occupations (mixed)* | Cooper et al., 2020 <sup>59</sup>   | n=1068 | Healthcare Practitioners and Technical Occupations and Healthcare Support Occupations* | Cross-sectional survey | 06/10 - 08/07 | The United Kingdom       | 5.43%             | Moderate |
| Healthcare Occupations (mixed)* | Cooper et al., 2020 <sup>59</sup>   | n=174  | Healthcare Practitioners and Technical Occupations and Healthcare Support Occupations* | Cross-sectional survey | 06/10 - 08/07 | The United Kingdom       | 5.75%             | Moderate |

|                                 |                                     |        |                                                                                        |                        |               |                    |                  |          |
|---------------------------------|-------------------------------------|--------|----------------------------------------------------------------------------------------|------------------------|---------------|--------------------|------------------|----------|
| Healthcare Occupations (mixed)* | Cooper et al., 2020 <sup>59</sup>   | n=319  | Healthcare Practitioners and Technical Occupations and Healthcare Support Occupations* | Cross-sectional survey | 06/10 - 08/07 | The United Kingdom | 11.29%           | Moderate |
| Healthcare Occupations (mixed)* | Cooper et al., 2020 <sup>59</sup>   | n=5698 | Healthcare Practitioners and Technical Occupations and Healthcare Support Occupations* | Cross-sectional survey | 06/10 - 08/07 | The United Kingdom | 7.2%             | Moderate |
| Healthcare Occupations (mixed)* | Cooper et al., 2020 <sup>59</sup>   | n=412  | Healthcare Practitioners and Technical Occupations and Healthcare Support Occupations* | Cross-sectional survey | 06/10 - 08/07 | The United Kingdom | 4.61%            | Moderate |
| Healthcare Occupations (mixed)* | Denyer et al., 2020 <sup>60</sup>   | n=5850 | Healthcare Practitioners and Technical Occupations and Healthcare Support Occupations* | Cross-sectional survey | 05/12 - 05/18 | Japan              | 1.79%            | Unclear  |
| Healthcare Occupations (mixed)* | Dimeglio et al., 2020 <sup>61</sup> | n=8758 | Healthcare Practitioners and Technical Occupations and Healthcare Support Occupations* | Cross-sectional survey | 06/10 - 07/10 | France             | 3.2% (2.8-3.5%)  | High     |
| Healthcare Occupations (mixed)* | Erber et al., 2020 <sup>31</sup>    | n=603  | Healthcare Practitioners and Technical Occupations and Healthcare Support Occupations* | Cross-sectional survey | 04/14 - 05/29 | Germany            | 2.8%             | High     |
| Healthcare Occupations (mixed)* | Fuereder et al., 2020 <sup>62</sup> | n=62   | Healthcare Practitioners and Technical Occupations and Healthcare Support Occupations* | Retrospective cohort   | 04/01 - 06/04 | Austria            | 3.2% (0.4-11.2%) | High     |

|                                 |                                     |        |                                                                                        |                                |               |                          |                    |          |
|---------------------------------|-------------------------------------|--------|----------------------------------------------------------------------------------------|--------------------------------|---------------|--------------------------|--------------------|----------|
| Healthcare Occupations (mixed)* | Fusco et al., 2020 <sup>63</sup>    | n=115  | Healthcare Practitioners and Technical Occupations and Healthcare Support Occupations* | Cross-sectional survey         | 03/23 - 04/02 | Italy                    | 1.74%              | High     |
| Healthcare Occupations (mixed)* | Geraci et al., 2020 <sup>64</sup>   | n=230  | Healthcare Practitioners and Technical Occupations and Healthcare Support Occupations* | Cross-sectional survey         | 03/16 - 05/20 | United States of America | 2.17%              | High     |
| Healthcare Occupations (mixed)* | Gudo et al., 2020 <sup>65</sup>     | n=1427 | Healthcare Practitioners and Technical Occupations and Healthcare Support Occupations* | Cross-sectional survey         | 06/17 - 06/30 | Mozambique               | 7% (6-9%)          | High     |
| Healthcare Occupations (mixed)* | Hackner et al., 2020 <sup>66</sup>  | n=130  | Healthcare Practitioners and Technical Occupations and Healthcare Support Occupations* | Cross-sectional survey         | 04/01 - 04/30 | Austria                  | 2.3%               | High     |
| Healthcare Occupations (mixed)* | Halatoko et al., 2020 <sup>41</sup> | n=370  | Healthcare Practitioners and Technical Occupations and Healthcare Support Occupations* | Cross-sectional survey         | 04/23 - 05/08 | Togo                     | 1.4%               | High     |
| Healthcare Occupations (mixed)* | Haq et al., 2020 <sup>67</sup>      | n=76   | Healthcare Practitioners and Technical Occupations and Healthcare Support Occupations* | Cross-sectional survey         | 06/15 - 06/29 | Pakistan                 | 35.5% (24.8-47.3%) | Moderate |
| Healthcare Occupations (mixed)* | He et al., 2020 <sup>68</sup>       | n=1059 | Healthcare Practitioners and Technical Occupations and Healthcare Support Occupations* | Repeated cross sectional study | 05/13 - 06/10 | China                    | 9.3%               | High     |

|                                 |                                      |         |                                                                                        |                                |               |                          |                    |          |
|---------------------------------|--------------------------------------|---------|----------------------------------------------------------------------------------------|--------------------------------|---------------|--------------------------|--------------------|----------|
| Healthcare Occupations (mixed)* | Herzberg et al., 2020 <sup>69</sup>  | n=871   | Healthcare Practitioners and Technical Occupations and Healthcare Support Occupations* | Prospective cohort             | 04/14 - 06/16 | Germany                  | 2.64%              | High     |
| Healthcare Occupations (mixed)* | Jeremias et al., 2020 <sup>70</sup>  | n=100   | Healthcare Practitioners and Technical Occupations and Healthcare Support Occupations* | Cross-sectional survey         | 03/01 - 04/30 | United States of America | 12%                | High     |
| Healthcare Occupations (mixed)* | Jespersen et al., 2020 <sup>71</sup> | n=17948 | Healthcare Practitioners and Technical Occupations and Healthcare Support Occupations* | Cross-sectional survey         | 05/18 - 06/19 | Denmark                  | 3.36% (2.38-3.82%) | Moderate |
| Healthcare Occupations (mixed)* | Kassem et al., 2020 <sup>72</sup>    | n=74    | Healthcare Practitioners and Technical Occupations and Healthcare Support Occupations* | Cross-sectional survey         | 06/01 - 06/14 | Egypt                    | 12.2%              | High     |
| Healthcare Occupations (mixed)* | Kern et al., 2020 <sup>73</sup>      | n=1316  | Healthcare Practitioners and Technical Occupations and Healthcare Support Occupations* | Cross-sectional survey         | 04/09 - 04/16 | Germany                  | 1.06% (0.58-1.78%) | High     |
| Healthcare Occupations (mixed)* | Khalil et al., 2020 <sup>74</sup>    | n=190   | Healthcare Practitioners and Technical Occupations and Healthcare Support Occupations* | Cross-sectional survey         | 05/15 - 05/28 | The United Kingdom       | 22%                | High     |
| Healthcare Occupations (mixed)* | Kumar et al., 2020 <sup>75</sup>     | n=635   | Healthcare Practitioners and Technical Occupations and Healthcare Support Occupations* | Repeated cross sectional study | 07/11 - 07/24 | India                    | 0%                 | High     |

|                                 |                                       |        |                                                                                        |                        |               |            |                 |          |
|---------------------------------|---------------------------------------|--------|----------------------------------------------------------------------------------------|------------------------|---------------|------------|-----------------|----------|
| Healthcare Occupations (mixed)* | Lackermair et al., 2020 <sup>76</sup> | n=151  | Healthcare Practitioners and Technical Occupations and Healthcare Support Occupations* | Cross-sectional survey | 04/02 - 04/06 | Germany    | 2.6% (0.8-7.1%) | High     |
| Healthcare Occupations (mixed)* | Lahner et al., 2020 <sup>77</sup>     | n=1084 | Healthcare Practitioners and Technical Occupations and Healthcare Support Occupations* | Cross-sectional survey | 04/07 - 04/27 | Italy      | 0.7%            | High     |
| Healthcare Occupations (mixed)* | Liu et al., 2020 <sup>78</sup>        | n=116  | Healthcare Practitioners and Technical Occupations and Healthcare Support Occupations* | Cross-sectional survey | 02/07 - 04/21 | China      | 0%              | High     |
| Healthcare Occupations (mixed)* | Liu et al., 2020 <sup>78</sup>        | n=304  | Healthcare Practitioners and Technical Occupations and Healthcare Support Occupations* | Cross-sectional survey | 02/07 - 04/21 | China      | 0%              | High     |
| Healthcare Occupations (mixed)* | Liu et al., 2020 <sup>79</sup>        | n=3832 | Healthcare Practitioners and Technical Occupations and Healthcare Support Occupations* | Cross-sectional survey | 02/29 - 04/29 | China      | 4% (3.4-4.7%)   | Moderate |
| Healthcare Occupations (mixed)* | Lorenzo et al., 2020 <sup>80</sup>    | n=38   | Healthcare Practitioners and Technical Occupations and Healthcare Support Occupations* | Cross-sectional survey | 05/02 - 05/31 | Italy      | 5.3%            | High     |
| Healthcare Occupations (mixed)* | Mahomed et al., 2020 <sup>81</sup>    | n=569  | Healthcare Practitioners and Technical Occupations and Healthcare Support Occupations* | Cross-sectional survey | 08/31 - 10/12 | Mozambique | 0.7%            | High     |



|                                 |                                          |        |                                                                                        |                        |               |                    |                |          |
|---------------------------------|------------------------------------------|--------|----------------------------------------------------------------------------------------|------------------------|---------------|--------------------|----------------|----------|
| Healthcare Occupations (mixed)* | Mahumane et al., 2020 <sup>82</sup>      | n=380  | Healthcare Practitioners and Technical Occupations and Healthcare Support Occupations* | Cross-sectional survey | 11/02 - 11/17 | Mozambique         | 1.3%           | High     |
| Healthcare Occupations (mixed)* | Majdoubi et al., 2020 <sup>83</sup>      | n=276  | Healthcare Practitioners and Technical Occupations and Healthcare Support Occupations* | Cross-sectional survey | 05/17 - 06/19 | Canada             | 0.6% (0-2.71%) | High     |
| Healthcare Occupations (mixed)* | Majiya et al., 2020 <sup>84</sup>        | n=185  | Healthcare Practitioners and Technical Occupations and Healthcare Support Occupations* | Cross-sectional survey | 06/26 - 06/30 | Nigeria            | 25.41%         | Moderate |
| Healthcare Occupations (mixed)* | Majiya et al., 2020 <sup>84</sup>        | n=43   | Healthcare Practitioners and Technical Occupations and Healthcare Support Occupations* | Cross-sectional survey | 06/26 - 06/30 | Nigeria            | 37.21%         | Moderate |
| Healthcare Occupations (mixed)* | Malfertheiner et al., 2020 <sup>85</sup> | n=139  | Healthcare Practitioners and Technical Occupations and Healthcare Support Occupations* | Prospective cohort     | 03/15 - 06/07 | Germany            | 0%             | High     |
| Healthcare Occupations (mixed)* | Martin et al., 2020 <sup>86</sup>        | n=326  | Healthcare Practitioners and Technical Occupations and Healthcare Support Occupations* | Cross-sectional survey | 04/15 - 05/18 | Belgium            | 11%            | High     |
| Healthcare Occupations (mixed)* | Martin et al., 2020 <sup>23</sup>        | n=4631 | Healthcare Practitioners and Technical Occupations and Healthcare Support Occupations* | Cross-sectional survey | 05/29 - 07/13 | The United Kingdom | 13.65%         | Moderate |

|                                 |                                      |        |                                                                                        |                        |               |                          |                   |          |
|---------------------------------|--------------------------------------|--------|----------------------------------------------------------------------------------------|------------------------|---------------|--------------------------|-------------------|----------|
| Healthcare Occupations (mixed)* | Melo et al., 2020 <sup>87</sup>      | n=471  | Healthcare Practitioners and Technical Occupations and Healthcare Support Occupations* | Cross-sectional survey | 06/01 - 06/30 | Brazil                   | 13.59%            | High     |
| Healthcare Occupations (mixed)* | Morcuende et al., 2020 <sup>88</sup> | n=6    | Healthcare Practitioners and Technical Occupations and Healthcare Support Occupations* | Cross-sectional survey | 03/01 - 04/21 | United States of America | 0%                | High     |
| Healthcare Occupations (mixed)* | Moscola et al., 2020 <sup>89</sup>   | n=8156 | Healthcare Practitioners and Technical Occupations and Healthcare Support Occupations* | Cross-sectional survey | 04/20 - 06/23 | United States of America | 11.6%             | High     |
| Healthcare Occupations (mixed)* | Nishida et al., 2020 <sup>90</sup>   | n=49   | Healthcare Practitioners and Technical Occupations and Healthcare Support Occupations* | Cross-sectional survey | 06/12 - 06/19 | Japan                    | 0%                | Moderate |
| Healthcare Occupations (mixed)* | Olalla et al., 2020 <sup>91</sup>    | n=498  | Healthcare Practitioners and Technical Occupations and Healthcare Support Occupations* | Cross-sectional survey | 04/15 - 04/25 | Spain                    | 2.2%              | High     |
| Healthcare Occupations (mixed)* | Pallett et al., 2020 <sup>92</sup>   | n=504  | Healthcare Practitioners and Technical Occupations and Healthcare Support Occupations* | Prospective cohort     | 04/08 - 06/12 | The United Kingdom       | 10.6% (7.6-13.6%) | High     |
| Healthcare Occupations (mixed)* | Pere et al., 2020 <sup>93</sup>      | n=3569 | Healthcare Practitioners and Technical Occupations and Healthcare Support Occupations* | Cross-sectional survey | 05/02 - 06/26 | France                   | 11.9%             | High     |

|                                 |                                       |        |                                                                                        |                        |               |                            |                    |          |
|---------------------------------|---------------------------------------|--------|----------------------------------------------------------------------------------------|------------------------|---------------|----------------------------|--------------------|----------|
| Healthcare Occupations (mixed)* | Poulikakos et al., 2020 <sup>94</sup> | n=281  | Healthcare Practitioners and Technical Occupations and Healthcare Support Occupations* | Cross-sectional survey | 05/04 - 05/06 | The United Kingdom         | 6%                 | High     |
| Healthcare Occupations (mixed)* | Psichogiou et al., 2020 <sup>95</sup> | n=1495 | Healthcare Practitioners and Technical Occupations and Healthcare Support Occupations* | Cross-sectional survey | 04/13 - 05/15 | Greece                     | 1.26% (0.43-3.26%) | Moderate |
| Healthcare Occupations (mixed)* | Satpati et al., 2020 <sup>27</sup>    | n=18   | Healthcare Practitioners and Technical Occupations and Healthcare Support Occupations* | Cross-sectional survey | 07/26 - 08/08 | India                      | 5.56%              | Moderate |
| Healthcare Occupations (mixed)* | Seetharam et al., 2020 <sup>96</sup>  | n=728  | Healthcare Practitioners and Technical Occupations and Healthcare Support Occupations* | Cross-sectional survey | 08/16 - 08/29 | India                      | 27.3% (24.1-30.6%) | Unclear  |
| Healthcare Occupations (mixed)* | Shakiba et al., 2020 <sup>10</sup>    | n=43   | Healthcare Practitioners and Technical Occupations and Healthcare Support Occupations* | Cross-sectional survey | 04/11 - 04/19 | Iran (Islamic Republic of) | 14.5% (4.5-25%)    | Moderate |
| Healthcare Occupations (mixed)* | Shields et al., 2020 <sup>97</sup>    | n=516  | Healthcare Practitioners and Technical Occupations and Healthcare Support Occupations* | Cross-sectional survey | 04/24 - 04/25 | The United Kingdom         | 24.4%              | High     |
| Healthcare Occupations (mixed)* | Silva et al., 2020 <sup>98</sup>      | n=61   | Healthcare Practitioners and Technical Occupations and Healthcare Support Occupations* | Cross-sectional survey | 04/09 - 04/29 | Brazil                     | 4.91%              | High     |

|                                 |                                        |         |                                                                                        |                        |               |                          |                 |         |
|---------------------------------|----------------------------------------|---------|----------------------------------------------------------------------------------------|------------------------|---------------|--------------------------|-----------------|---------|
| Healthcare Occupations (mixed)* | Solodky et al., 2020 <sup>99</sup>     | n=85    | Healthcare Practitioners and Technical Occupations and Healthcare Support Occupations* | Cross-sectional survey | 03/01 - 04/16 | France                   | 5.88%           | High    |
| Healthcare Occupations (mixed)* | Soriano et al., 2020 <sup>100</sup>    | n=108   | Healthcare Practitioners and Technical Occupations and Healthcare Support Occupations* | Retrospective cohort   | 04/26 - 05/16 | Spain                    | 13%             | High    |
| Healthcare Occupations (mixed)* | Statistica et al., 2020 <sup>101</sup> | n=64660 | Healthcare Practitioners and Technical Occupations and Healthcare Support Occupations* | Cross-sectional survey | 05/25 - 07/15 | Italy                    | 2.5%            | Unclear |
| Healthcare Occupations (mixed)* | Steensels et al., 2020 <sup>102</sup>  | n=3056  | Healthcare Practitioners and Technical Occupations and Healthcare Support Occupations* | Cross-sectional survey | 04/22 - 04/30 | Belgium                  | 6.4% (5.5-7.3%) | High    |
| Healthcare Occupations (mixed)* | Stock et al., 2020 <sup>103</sup>      | n=98    | Healthcare Practitioners and Technical Occupations and Healthcare Support Occupations* | Cross-sectional survey | 04/04 - 04/20 | United States of America | 15.3%           | High    |
| Healthcare Occupations (mixed)* | Takita et al., 2020 <sup>104</sup>     | n=175   | Healthcare Practitioners and Technical Occupations and Healthcare Support Occupations* | Cross-sectional survey | 04/20 - 05/20 | Japan                    | 4% (1.62-8.07%) | High    |
| Healthcare Occupations (mixed)* | Tong et al., 2020 <sup>105</sup>       | n=191   | Healthcare Practitioners and Technical Occupations and Healthcare Support Occupations* | Cross-sectional survey | 05/12 - 05/15 | China                    | 0%              | High    |

|                                 |                                                |        |                                                                                        |                                                                                   |               |            |        |      |
|---------------------------------|------------------------------------------------|--------|----------------------------------------------------------------------------------------|-----------------------------------------------------------------------------------|---------------|------------|--------|------|
| Healthcare Occupations (mixed)* | Trieu et al., 2020 <sup>106</sup>              | n=607  | Healthcare Practitioners and Technical Occupations and Healthcare Support Occupations* | Prospective cohort                                                                | 03/06 - 04/09 | Norway     | 5.27%  | High |
| Healthcare Occupations (mixed)* | Tu et al., 2020 <sup>107</sup>                 | n=325  | Healthcare Practitioners and Technical Occupations and Healthcare Support Occupations* | Cross sectional study with prospective cohort follow up of a subset of the sample | 03/19 - 03/20 | China      | 43.08% | High |
| Healthcare Occupations (mixed)* | Valdivia et al., 2020 <sup>108</sup>           | n=1153 | Healthcare Practitioners and Technical Occupations and Healthcare Support Occupations* | Cross-sectional survey                                                            | 04/13 - 04/30 | Spain      | 3.5%   | High |
| Healthcare Occupations (mixed)* | Vasquez et al., 2020 <sup>109</sup>            | n=1147 | Healthcare Practitioners and Technical Occupations and Healthcare Support Occupations* | Cross-sectional survey                                                            | 05/19 - 06/06 | Peru       | 58.3%  | High |
| Healthcare Occupations (mixed)* | Viegas et al., 2020 <sup>110</sup>             | n=1443 | Healthcare Practitioners and Technical Occupations and Healthcare Support Occupations* | Cross-sectional survey                                                            | 08/03 - 08/21 | Mozambique | 2.63%  | High |
| Healthcare Occupations (mixed)* | Vlachoyiannopoulou et al., 2020 <sup>111</sup> | n=321  | Healthcare Practitioners and Technical Occupations and Healthcare Support Occupations* | Cross-sectional survey                                                            | 04/25 - 05/10 | Greece     | 2.18%  | High |
| Healthcare Occupations (mixed)* | Volta et al., 2020 <sup>112</sup>              | n=76   | Healthcare Practitioners and Technical Occupations and Healthcare Support Occupations* | Cross-sectional survey                                                            | 04/27 - 04/27 | Italy      | 11.8%  | High |

|                                 |                                      |        |                                                                                                                |                        |               |                          |        |          |
|---------------------------------|--------------------------------------|--------|----------------------------------------------------------------------------------------------------------------|------------------------|---------------|--------------------------|--------|----------|
| Healthcare Occupations (mixed)* | Ward et al., 2020 <sup>113</sup>     | n=5416 | Healthcare Practitioners and Technical Occupations and Healthcare Support Occupations*                         | Cross-sectional survey | 09/15 - 09/28 | The United Kingdom       | 10.67% | Moderate |
| Healthcare Occupations (mixed)* | Ward et al., 2020 <sup>113</sup>     | n=1692 | Healthcare Practitioners and Technical Occupations and Healthcare Support Occupations*                         | Cross-sectional survey | 09/15 - 09/28 | The United Kingdom       | 6.68%  | Moderate |
| Healthcare Occupations (mixed)* | Xiong et al., 2020 <sup>114</sup>    | n=797  | Healthcare Practitioners and Technical Occupations and Healthcare Support Occupations*                         | Cross-sectional survey | 02/12 - 03/17 | China                    | 4.39%  | Unclear  |
| Healthcare Occupations (mixed)* | Zhang et al., 2020 <sup>115</sup>    | n=63   | Healthcare Practitioners and Technical Occupations and Healthcare Support Occupations*                         | Cross-sectional survey | 01/21 - 02/16 | China                    | 0%     | High     |
| Healthcare Occupations (mixed)* | Zhao et al., 2020 <sup>116</sup>     | n=1060 | Healthcare Practitioners and Technical Occupations and Healthcare Support Occupations*                         | Cross-sectional survey | 01/14 - 02/21 | China                    | 8.3%   | High     |
| First responders (mixed)*       | Ahmad et al., 2020 <sup>117</sup>    | n=40   | Healthcare Practitioners and Technical Occupations and Protective Service Occupations (i.e. first responders)* | Cross-sectional survey | 04/21 - 05/22 | United States of America | 20%    | High     |
| First responders (mixed)*       | Halbrook et al., 2020 <sup>118</sup> | n=679  | Healthcare Practitioners and Technical Occupations and Protective Service Occupations (i.e. first responders)* | Cross-sectional survey | 05/19 - 08/31 | United States of America | 8.1%   | Moderate |

|                                                          |                                                              |                                         |       |                                                                                                                |                        |               |                          |                    |          |
|----------------------------------------------------------|--------------------------------------------------------------|-----------------------------------------|-------|----------------------------------------------------------------------------------------------------------------|------------------------|---------------|--------------------------|--------------------|----------|
| 1<br>2<br>3<br>4<br>5<br>6<br>7<br>8<br>9                | First responders (mixed)*                                    | Iwuji et al., 2020 <sup>119</sup>       | n=683 | Healthcare Practitioners and Technical Occupations and Protective Service Occupations (i.e. first responders)* | Cross-sectional survey | 05/12 - 05/13 | United States of America | 0.7%               | High     |
| 10<br>11<br>12<br>13<br>14<br>15                         | First responders (mixed)*                                    | Magyar et al., 2020 <sup>120</sup>      | n=70  | Healthcare Practitioners and Technical Occupations and Protective Service Occupations (i.e. first responders)* | Cross-sectional survey | 05/01 - 05/14 | United States of America | 4.29%              | High     |
| 16<br>17<br>18<br>19<br>20<br>21                         | First responders (mixed)*                                    | Martinez et al., 2020 <sup>121</sup>    | n=79  | Healthcare Practitioners and Technical Occupations and Protective Service Occupations (i.e. first responders)* | Cross-sectional survey | 04/16 - 04/17 | United States of America | 5.06%              | High     |
| 22<br>23<br>24<br>25<br>26<br>27                         | First responders (mixed)*                                    | Staletovich et al., 2020 <sup>122</sup> | n=359 | Healthcare Practitioners and Technical Occupations and Protective Service Occupations (i.e. first responders)* | Cross-sectional survey | 05/17 - 05/22 | United States of America | 0%                 | Unclear  |
| 28<br>29<br>30<br>31<br>32                               | Healthcare Practitioners and Technical Occupations (29-0000) | Hibino et al., 2020 <sup>123</sup>      | n=806 | Health Diagnosing and Treating Practitioners                                                                   | Cross-sectional survey | 06/01 - 07/30 | Japan                    | 0.74% (0.27-1.61%) | Unclear  |
| 33<br>34<br>35<br>36<br>37                               | Healthcare Practitioners and Technical Occupations (29-0000) | Jones et al., 2020 <sup>29</sup>        | n=856 | Dentists, General                                                                                              | Cross-sectional survey | 01/15 - 06/15 | The United Kingdom       | 7.9%               | High     |
| 38<br>39<br>40<br>41<br>42<br>43<br>44<br>45<br>46<br>47 | Life, Physical, and Social Science                           | Calcagno et al., 2020 <sup>124</sup>    | n=343 | Life, Physical, and Social Science Occupations                                                                 | Cross-sectional survey | 04/17 - 05/20 | Italy                    | 6.71%              | Moderate |

|                                                              |                                      |       |                              |                        |               |                          |                 |          |
|--------------------------------------------------------------|--------------------------------------|-------|------------------------------|------------------------|---------------|--------------------------|-----------------|----------|
| Occupations (19-0000)                                        |                                      |       |                              |                        |               |                          |                 |          |
| Healthcare Practitioners and Technical Occupations (29-0000) | Goenka et al., 2020 <sup>25</sup>    | n=49  | Dietitians and Nutritionists | Cross-sectional survey | 07/12 - 08/23 | India                    | 18.37%          | Moderate |
| Healthcare Practitioners and Technical Occupations (29-0000) | Goenka et al., 2020 <sup>26</sup>    | n=6   | Dietitians and Nutritionists | Cross-sectional survey | 08/01 - 08/31 | India                    | 0%              | High     |
| Healthcare Practitioners and Technical Occupations (29-0000) | Akinbami et al., 2020 <sup>46</sup>  | n=321 | Pharmacists                  | Cross-sectional survey | 05/18 - 06/13 | United States of America | 4.4% (2.4-7.2%) | Moderate |
| Healthcare Practitioners and Technical Occupations (29-0000) | Alharbi et al., 2020 <sup>125</sup>  | n=5   | Pharmacists                  | Cross-sectional survey | 04/18 - 06/17 | Saudi Arabia             | 0%              | High     |
| Healthcare Practitioners and Technical Occupations (29-0000) | Calcagno et al., 2020 <sup>124</sup> | n=29  | Pharmacists                  | Cross-sectional survey | 04/17 - 05/20 | Italy                    | 3.45%           | Moderate |
| Healthcare Practitioners and Technical Occupations (29-0000) | Chau et al., 2020 <sup>126</sup>     | n=17  | Pharmacists                  | Cross-sectional survey | 08/23 - 08/30 | Viet Nam                 | 0%              | High     |
| Healthcare Practitioners and Technical Occupations (29-0000) | Hanrath et al., 2020 <sup>32</sup>   | n=189 | Pharmacists                  | Cross-sectional survey | 05/29 - 07/06 | The United Kingdom       | 4.76%           | High     |



|                                                              |                                    |       |                         |                        |               |                          |                 |          |
|--------------------------------------------------------------|------------------------------------|-------|-------------------------|------------------------|---------------|--------------------------|-----------------|----------|
| Healthcare Practitioners and Technical Occupations (29-0000) | Khan et al., 2020 <sup>127</sup>   | n=109 | Pharmacists             | Cross-sectional survey | 06/15 - 06/29 | India                    | 0%              | Moderate |
| Healthcare Practitioners and Technical Occupations (29-0000) | Mahomed et al., 2020 <sup>81</sup> | n=404 | Pharmacists             | Cross-sectional survey | 08/31 - 10/12 | Mozambique               | 0.5%            | High     |
| Healthcare Practitioners and Technical Occupations (29-0000) | Martin et al., 2020 <sup>23</sup>  | n=113 | Pharmacists             | Cross-sectional survey | 05/29 - 07/13 | The United Kingdom       | 0%              | Moderate |
| Healthcare Practitioners and Technical Occupations (29-0000) | Rosser et al., 2020 <sup>33</sup>  | n=213 | Pharmacists             | Cross-sectional survey | 04/20 - 05/20 | United States of America | 1.88%           | High     |
| Healthcare Practitioners and Technical Occupations (29-0000) | Costa et al., 2020 <sup>128</sup>  | n=652 | Physicians and Surgeons | Cross-sectional survey | 05/14 - 05/28 | Brazil                   | 5.8%            | Moderate |
| Healthcare Practitioners and Technical Occupations (29-0000) | Mohr et al., 2020 <sup>129</sup>   | n=372 | Physicians and Surgeons | Cross-sectional survey | 05/13 - 07/08 | United States of America | 1.61%           | Moderate |
| Healthcare Practitioners and Technical Occupations (29-0000) | Nishida et al., 2020 <sup>90</sup> | n=63  | Physicians and Surgeons | Cross-sectional survey | 06/12 - 06/19 | Japan                    | 3.2% (0.88-11%) | Moderate |
| Healthcare Practitioners and                                 | Noor et al., 2020 <sup>130</sup>   | n=157 | Physicians and Surgeons | Cross-sectional survey | 07/13 - 07/15 | Pakistan                 | 17.83%          | Moderate |

|                                                              |                                      |        |                                    |                                                                                   |               |                          |                 |          |
|--------------------------------------------------------------|--------------------------------------|--------|------------------------------------|-----------------------------------------------------------------------------------|---------------|--------------------------|-----------------|----------|
| Technical Occupations (29-0000)                              |                                      |        |                                    |                                                                                   |               |                          |                 |          |
| Healthcare Practitioners and Technical Occupations (29-0000) | Singhal et al., 2020 <sup>131</sup>  | n=208  | Physicians and Surgeons            | Cross-sectional survey                                                            | 06/01 - 06/30 | India                    | 12.5%           | High     |
| Healthcare Practitioners and Technical Occupations (29-0000) | Morcuende et al., 2020 <sup>88</sup> | n=23   | Anesthesiologists                  | Cross-sectional survey                                                            | 03/01 - 04/21 | United States of America | 13.04%          | High     |
| Healthcare Practitioners and Technical Occupations (29-0000) | Morcuende et al., 2020 <sup>88</sup> | n=3    | Obstetricians and Gynecologists    | Cross-sectional survey                                                            | 03/01 - 04/21 | United States of America | 100%            | High     |
| Healthcare Practitioners and Technical Occupations (29-0000) | Urbieto et al., 2020 <sup>132</sup>  | n=23   | Pediatricians, General             | Cross-sectional survey                                                            | 04/14 - 04/16 | Spain                    | 4.3%            | High     |
| Healthcare Practitioners and Technical Occupations (29-0000) | Iversen et al., 2020 <sup>8</sup>    | n=1944 | Psychiatrists                      | Cross-sectional survey                                                            | 04/15 - 04/22 | Denmark                  | 1.85%           | Low      |
| Healthcare Practitioners and Technical Occupations (29-0000) | Leidner et al., 2020 <sup>22</sup>   | n=301  | Surgeons                           | Cross sectional study with prospective cohort follow up of a subset of the sample | 04/08 - 05/22 | United States of America | 2.66%           | High     |
| Healthcare Practitioners and Technical                       | Akinbami et al., 2020 <sup>46</sup>  | n=2297 | Physicians and Surgeons, All Other | Cross-sectional survey                                                            | 05/18 - 06/13 | United States of America | 6.1% (5.1-7.1%) | Moderate |

|                                                              |                                     |        |                                    |                                                              |               |              |        |          |
|--------------------------------------------------------------|-------------------------------------|--------|------------------------------------|--------------------------------------------------------------|---------------|--------------|--------|----------|
| Occupations (29-0000)                                        |                                     |        |                                    |                                                              |               |              |        |          |
| Healthcare Practitioners and Technical Occupations (29-0000) | Alharbi et al., 2020 <sup>125</sup> | n=18   | Physicians and Surgeons, All Other | Cross-sectional survey                                       | 04/18 - 06/17 | Saudi Arabia | 27.78% | High     |
| Healthcare Practitioners and Technical Occupations (29-0000) | Amendola et al., 2020 <sup>47</sup> | n=214  | Physicians and Surgeons, All Other | Cross-sectional survey                                       | 04/15 - 04/15 | Italy        | 4.67%  | High     |
| Healthcare Practitioners and Technical Occupations (29-0000) | Baracco et al., 2020 <sup>24</sup>  | n=417  | Physicians and Surgeons, All Other | Cross-sectional survey                                       | 04/23 - 05/05 | Italy        | 17%    | High     |
| Healthcare Practitioners and Technical Occupations (29-0000) | Barallat et al., 2020 <sup>50</sup> | n=1821 | Physicians and Surgeons, All Other | Cross-sectional survey                                       | 05/04 - 05/22 | Spain        | 11.81% | High     |
| Healthcare Practitioners and Technical Occupations (29-0000) | Bianchi et al., 2020 <sup>133</sup> | n=34   | Physicians and Surgeons, All Other | Cross-sectional survey                                       | 04/15 - 05/15 | Italy        | 5.88%  | Unclear  |
| Healthcare Practitioners and Technical Occupations (29-0000) | Blairon et al., 2020 <sup>52</sup>  | n=323  | Physicians and Surgeons, All Other | Cross-sectional survey                                       | 05/25 - 06/19 | Belgium      | 11.8%  | High     |
| Healthcare Practitioners and Technical Occupations (29-0000) | Brehm et al., 2020 <sup>7</sup>     | n=275  | Physicians and Surgeons, All Other | Cross sectional study with prospective cohort follow up of a | 03/20 - 07/17 | Germany      | 3.3%   | Moderate |

|                                                              |                                       |       |                                    |                        |               |                    |        |          |
|--------------------------------------------------------------|---------------------------------------|-------|------------------------------------|------------------------|---------------|--------------------|--------|----------|
|                                                              |                                       |       |                                    | subset of the sample   |               |                    |        |          |
| Healthcare Practitioners and Technical Occupations (29-0000) | Brousseau et al., 2020 <sup>134</sup> | n=432 | Physicians and Surgeons, All Other | Cross-sectional survey | 07/06 - 09/24 | Canada             | 7.2%   | High     |
| Healthcare Practitioners and Technical Occupations (29-0000) | Calcagno et al., 2020 <sup>124</sup>  | n=700 | Physicians and Surgeons, All Other | Cross-sectional survey | 04/17 - 05/20 | Italy              | 7.86%  | Moderate |
| Healthcare Practitioners and Technical Occupations (29-0000) | Chau et al., 2020 <sup>126</sup>      | n=64  | Physicians and Surgeons, All Other | Cross-sectional survey | 08/23 - 08/30 | Viet Nam           | 0%     | High     |
| Healthcare Practitioners and Technical Occupations (29-0000) | Chen et al., 2020 <sup>135</sup>      | n=17  | Physicians and Surgeons, All Other | Cross-sectional survey | 02/19 - 02/19 | China              | 41.18% | High     |
| Healthcare Practitioners and Technical Occupations (29-0000) | Erber et al., 2020 <sup>31</sup>      | n=860 | Physicians and Surgeons, All Other | Cross-sectional survey | 04/14 - 05/29 | Germany            | 1.63%  | High     |
| Healthcare Practitioners and Technical Occupations (29-0000) | Favara et al., 2020 <sup>136</sup>    | n=15  | Physicians and Surgeons, All Other | Prospective cohort     | 06/01 - 06/07 | The United Kingdom | 13.33% | High     |
| Healthcare Practitioners and Technical Occupations (29-0000) | Favara et al., 2020 <sup>19</sup>     | n=82  | Physicians and Surgeons, All Other | Cross-sectional survey | 07/13 - 07/13 | The United Kingdom | 10.9%  | High     |

|                                                              |                                      |       |                                    |                        |               |                          |        |          |
|--------------------------------------------------------------|--------------------------------------|-------|------------------------------------|------------------------|---------------|--------------------------|--------|----------|
| Healthcare Practitioners and Technical Occupations (29-0000) | Fujita et al., 2020 <sup>137</sup>   | n=42  | Physicians and Surgeons, All Other | Cross-sectional survey | 04/10 - 04/20 | Japan                    | 4.7%   | High     |
| Healthcare Practitioners and Technical Occupations (29-0000) | Galan et al., 2020 <sup>20</sup>     | n=564 | Physicians and Surgeons, All Other | Cross-sectional survey | 04/14 - 04/27 | Spain                    | 39.36% | High     |
| Healthcare Practitioners and Technical Occupations (29-0000) | Godbout et al., 2020 <sup>138</sup>  | n=490 | Physicians and Surgeons, All Other | Cross-sectional survey | 07/27 - 10/02 | United States of America | 1.43%  | High     |
| Healthcare Practitioners and Technical Occupations (29-0000) | Goenka et al., 2020 <sup>25</sup>    | n=255 | Physicians and Surgeons, All Other | Cross-sectional survey | 07/12 - 08/23 | India                    | 3.92%  | Moderate |
| Healthcare Practitioners and Technical Occupations (29-0000) | Goenka et al., 2020 <sup>26</sup>    | n=29  | Physicians and Surgeons, All Other | Cross-sectional survey | 08/01 - 08/31 | India                    | 20.69% | High     |
| Healthcare Practitioners and Technical Occupations (29-0000) | Hanrath et al., 2020 <sup>32</sup>   | n=899 | Physicians and Surgeons, All Other | Cross-sectional survey | 05/29 - 07/06 | The United Kingdom       | 7.01%  | High     |
| Healthcare Practitioners and Technical Occupations (29-0000) | Houlihan et al., 2020 <sup>139</sup> | n=72  | Physicians and Surgeons, All Other | Cross-sectional survey | 03/26 - 04/08 | The United Kingdom       | 22%    | High     |
| Healthcare Practitioners and                                 | Hunter et al., 2020 <sup>21</sup>    | n=279 | Physicians and Surgeons, All Other | Cross-sectional survey | 04/29 - 05/08 | United States of America | 1.08%  | High     |

|                                                              |                                     |        |                                    |                        |               |                          |                 |      |
|--------------------------------------------------------------|-------------------------------------|--------|------------------------------------|------------------------|---------------|--------------------------|-----------------|------|
| Technical Occupations (29-0000)                              |                                     |        |                                    |                        |               |                          |                 |      |
| Healthcare Practitioners and Technical Occupations (29-0000) | Insua et al., 2020 <sup>140</sup>   | n=116  | Physicians and Surgeons, All Other | Cross-sectional survey | 06/08 - 06/09 | Argentina                | 0.9% (0.1-5.5%) | High |
| Healthcare Practitioners and Technical Occupations (29-0000) | Iversen et al., 2020 <sup>8</sup>   | n=4698 | Physicians and Surgeons, All Other | Cross-sectional survey | 04/15 - 04/22 | Denmark                  | 4.07%           | Low  |
| Healthcare Practitioners and Technical Occupations (29-0000) | Iversen et al., 2020 <sup>8</sup>   | n=113  | Physicians and Surgeons, All Other | Cross-sectional survey | 04/15 - 04/22 | Denmark                  | 7.08%           | Low  |
| Healthcare Practitioners and Technical Occupations (29-0000) | Jeremias et al., 2020 <sup>70</sup> | n=79   | Physicians and Surgeons, All Other | Cross-sectional survey | 03/01 - 04/30 | United States of America | 11.4%           | High |
| Healthcare Practitioners and Technical Occupations (29-0000) | Kassem et al., 2020 <sup>72</sup>   | n=30   | Physicians and Surgeons, All Other | Cross-sectional survey | 06/01 - 06/14 | Egypt                    | 6.66%           | High |
| Healthcare Practitioners and Technical Occupations (29-0000) | Kassem et al., 2020 <sup>72</sup>   | n=30   | Physicians and Surgeons, All Other | Cross-sectional survey | 06/01 - 06/14 | Egypt                    | 3.33%           | High |
| Healthcare Practitioners and Technical                       | Kassem et al., 2020 <sup>72</sup>   | n=30   | Physicians and Surgeons, All Other | Cross-sectional survey | 06/01 - 06/14 | Egypt                    | 0%              | High |

|                                                              |                                    |        |                                    |                                                                                   |               |                          |                |          |
|--------------------------------------------------------------|------------------------------------|--------|------------------------------------|-----------------------------------------------------------------------------------|---------------|--------------------------|----------------|----------|
| Occupations (29-0000)                                        |                                    |        |                                    |                                                                                   |               |                          |                |          |
| Healthcare Practitioners and Technical Occupations (29-0000) | Kassem et al., 2020 <sup>72</sup>  | n=30   | Physicians and Surgeons, All Other | Cross-sectional survey                                                            | 06/01 - 06/14 | Egypt                    | 3.33%          | High     |
| Healthcare Practitioners and Technical Occupations (29-0000) | Khan et al., 2020 <sup>127</sup>   | n=980  | Physicians and Surgeons, All Other | Cross-sectional survey                                                            | 06/15 - 06/29 | India                    | 2.8% (1.9-4%)  | Moderate |
| Healthcare Practitioners and Technical Occupations (29-0000) | Kohler et al., 2020 <sup>141</sup> | n=268  | Physicians and Surgeons, All Other | Cross-sectional survey                                                            | 03/19 - 04/03 | Switzerland              | 1.49%          | High     |
| Healthcare Practitioners and Technical Occupations (29-0000) | Kumar et al., 2020 <sup>142</sup>  | n=201  | Physicians and Surgeons, All Other | Cross-sectional survey                                                            | 06/01 - 06/30 | India                    | 7% (4.2-11.4%) | High     |
| Healthcare Practitioners and Technical Occupations (29-0000) | Leidner et al., 2020 <sup>22</sup> | n=1081 | Physicians and Surgeons, All Other | Cross sectional study with prospective cohort follow up of a subset of the sample | 04/08 - 05/22 | United States of America | 3.33%          | High     |
| Healthcare Practitioners and Technical Occupations (29-0000) | Lumley et al., 2020 <sup>9</sup>   | n=1859 | Physicians and Surgeons, All Other | Prospective cohort                                                                | 04/23 - 11/30 | The United Kingdom       | 10.11%         | Moderate |
| Healthcare Practitioners and Technical                       | Martin et al., 2020 <sup>23</sup>  | n=1243 | Physicians and Surgeons, All Other | Cross-sectional survey                                                            | 05/29 - 07/13 | The United Kingdom       | 10.3%          | Moderate |

|                                                              |                                       |        |                                    |                        |               |                          |                  |          |
|--------------------------------------------------------------|---------------------------------------|--------|------------------------------------|------------------------|---------------|--------------------------|------------------|----------|
| Occupations (29-0000)                                        |                                       |        |                                    |                        |               |                          |                  |          |
| Healthcare Practitioners and Technical Occupations (29-0000) | Mesnil et al., 2020 <sup>143</sup>    | n=111  | Physicians and Surgeons, All Other | Cross-sectional survey | 06/08 - 06/22 | France                   | 11%              | High     |
| Healthcare Practitioners and Technical Occupations (29-0000) | Missaglia et al., 2020 <sup>144</sup> | n=377  | Physicians and Surgeons, All Other | Cross-sectional survey | 04/01 - 04/30 | Italy                    | 14.9%            | High     |
| Healthcare Practitioners and Technical Occupations (29-0000) | Mohr et al., 2020 <sup>129</sup>      | n=272  | Physicians and Surgeons, All Other | Cross-sectional survey | 05/13 - 07/08 | United States of America | 2.94%            | Moderate |
| Healthcare Practitioners and Technical Occupations (29-0000) | Moscola et al., 2020 <sup>89</sup>    | n=3746 | Physicians and Surgeons, All Other | Cross-sectional survey | 04/20 - 06/23 | United States of America | 8.7%             | High     |
| Healthcare Practitioners and Technical Occupations (29-0000) | Nishida et al., 2020 <sup>90</sup>    | n=149  | Physicians and Surgeons, All Other | Cross-sectional survey | 06/12 - 06/19 | Japan                    | 1.3% (0.37-4.8%) | Moderate |
| Healthcare Practitioners and Technical Occupations (29-0000) | Nishida et al., 2020 <sup>90</sup>    | n=46   | Physicians and Surgeons, All Other | Cross-sectional survey | 06/12 - 06/19 | Japan                    | 0%               | Moderate |
| Healthcare Practitioners and Technical Occupations (29-0000) | Nishida et al., 2020 <sup>90</sup>    | n=40   | Physicians and Surgeons, All Other | Cross-sectional survey | 06/12 - 06/19 | Japan                    | 0%               | Moderate |



|                                                              |                                         |        |                                    |                        |               |                          |                   |          |
|--------------------------------------------------------------|-----------------------------------------|--------|------------------------------------|------------------------|---------------|--------------------------|-------------------|----------|
| Healthcare Practitioners and Technical Occupations (29-0000) | Nishida et al., 2020 <sup>90</sup>      | n=59   | Physicians and Surgeons, All Other | Cross-sectional survey | 06/12 - 06/19 | Japan                    | 1.7% (0.3-9%)     | Moderate |
| Healthcare Practitioners and Technical Occupations (29-0000) | Nishida et al., 2020 <sup>90</sup>      | n=925  | Physicians and Surgeons, All Other | Cross-sectional survey | 06/12 - 06/19 | Japan                    | 0.43% (0.17-1.1%) | Moderate |
| Healthcare Practitioners and Technical Occupations (29-0000) | Noor et al., 2020 <sup>130</sup>        | n=303  | Physicians and Surgeons, All Other | Cross-sectional survey | 07/13 - 07/15 | Pakistan                 | 19.8%             | Moderate |
| Healthcare Practitioners and Technical Occupations (29-0000) | Orth-Holler et al., 2020 <sup>145</sup> | n=377  | Physicians and Surgeons, All Other | Cross-sectional survey | 03/20 - 03/27 | Austria                  | 0.3% (0.01-1.5%)  | High     |
| Healthcare Practitioners and Technical Occupations (29-0000) | Plebani et al., 2020 <sup>146</sup>     | n=2337 | Physicians and Surgeons, All Other | Cross-sectional survey | 02/22 - 05/29 | Italy                    | 3.6% (2.8-4.4%)   | High     |
| Healthcare Practitioners and Technical Occupations (29-0000) | Rosser et al., 2020 <sup>33</sup>       | n=2533 | Physicians and Surgeons, All Other | Cross-sectional survey | 04/20 - 05/20 | United States of America | 1.07%             | High     |
| Healthcare Practitioners and Technical Occupations (29-0000) | Rudberg et al., 2020 <sup>147</sup>     | n=439  | Physicians and Surgeons, All Other | Cross-sectional survey | 04/14 - 05/08 | Sweden                   | 19.1%             | Moderate |
| Healthcare Practitioners and                                 | Schmidt et al., 2020 <sup>148</sup>     | n=34   | Physicians and Surgeons, All Other | Cross-sectional survey | 04/20 - 04/30 | Germany                  | 8.82%             | High     |

|                                                              |                                       |       |                                    |                        |               |                          |       |          |
|--------------------------------------------------------------|---------------------------------------|-------|------------------------------------|------------------------|---------------|--------------------------|-------|----------|
| Technical Occupations (29-0000)                              |                                       |       |                                    |                        |               |                          |       |          |
| Healthcare Practitioners and Technical Occupations (29-0000) | Sotgiu et al., 2020 <sup>149</sup>    | n=115 | Physicians and Surgeons, All Other | Cross-sectional survey | 04/02 - 04/16 | Italy                    | 6.09% | High     |
| Healthcare Practitioners and Technical Occupations (29-0000) | Venugopal et al., 2020 <sup>150</sup> | n=157 | Physicians and Surgeons, All Other | Cross-sectional survey | 03/01 - 05/01 | United States of America | 25%   | Moderate |
| Healthcare Practitioners and Technical Occupations (29-0000) | Yogo et al., 2020 <sup>36</sup>       | n=110 | Physicians and Surgeons, All Other | Cross-sectional survey | 05/20 - 06/08 | United States of America | 1.82% | High     |
| Healthcare Practitioners and Technical Occupations (29-0000) | Brzostek et al., 2020 <sup>151</sup>  | n=998 | Physician Assistants               | Cross-sectional survey | 04/17 - 05/07 | United States of America | 28.3% | Moderate |
| Healthcare Practitioners and Technical Occupations (29-0000) | Hoffmann et al., 2020 <sup>152</sup>  | n=156 | Physician Assistants               | Prospective cohort     | 07/01 - 07/31 | Germany                  | 1.3%  | High     |
| Healthcare Practitioners and Technical Occupations (29-0000) | Mohr et al., 2020 <sup>129</sup>      | n=156 | Physician Assistants               | Cross-sectional survey | 05/13 - 07/08 | United States of America | 0.64% | Moderate |
| Healthcare Practitioners and Technical                       | Morcuende et al., 2020 <sup>88</sup>  | n=6   | Physician Assistants               | Cross-sectional survey | 03/01 - 04/21 | United States of America | 9.43% | High     |

|                                                              |                                      |       |                         |                        |               |                          |                 |          |
|--------------------------------------------------------------|--------------------------------------|-------|-------------------------|------------------------|---------------|--------------------------|-----------------|----------|
| Occupations (29-0000)                                        |                                      |       |                         |                        |               |                          |                 |          |
| Healthcare Practitioners and Technical Occupations (29-0000) | Morcuende et al., 2020 <sup>88</sup> | n=53  | Physician Assistants    | Cross-sectional survey | 03/01 - 04/21 | United States of America | 9.43%           | High     |
| Healthcare Practitioners and Technical Occupations (29-0000) | Patel et al., 2020 <sup>153</sup>    | n=230 | Physician Assistants    | Prospective cohort     | 06/02 - 06/27 | United States of America | 3.48%           | High     |
| Healthcare Practitioners and Technical Occupations (29-0000) | Self et al., 2020 <sup>154</sup>     | n=919 | Physician Assistants    | Cross-sectional survey | 04/03 - 06/19 | United States of America | 5.66%           | Moderate |
| Healthcare Practitioners and Technical Occupations (29-0000) | Shah et al., 2020 <sup>155</sup>     | n=248 | Physician Assistants    | Cross-sectional survey | 05/25 - 07/09 | United States of America | 0%              | High     |
| Healthcare Practitioners and Technical Occupations (29-0000) | Shah et al., 2020 <sup>155</sup>     | n=320 | Physician Assistants    | Cross-sectional survey | 05/25 - 07/09 | United States of America | 0.63%           | High     |
| Healthcare Practitioners and Technical Occupations (29-0000) | Lumley et al., 2020 <sup>9</sup>     | n=386 | Occupational Therapists | Prospective cohort     | 04/23 - 11/30 | The United Kingdom       | 11.4%           | Moderate |
| Healthcare Practitioners and Technical Occupations (29-0000) | Akinbami et al., 2020 <sup>46</sup>  | n=235 | Physical Therapists     | Cross-sectional survey | 05/18 - 06/13 | United States of America | 10.6% (7-15.3%) | Moderate |

|                                                              |                                     |       |                        |                                                                                   |               |                          |                  |          |
|--------------------------------------------------------------|-------------------------------------|-------|------------------------|-----------------------------------------------------------------------------------|---------------|--------------------------|------------------|----------|
| Healthcare Practitioners and Technical Occupations (29-0000) | Brehm et al., 2020 <sup>7</sup>     | n=15  | Physical Therapists    | Cross sectional study with prospective cohort follow up of a subset of the sample | 03/20 - 07/17 | Germany                  | 0%               | Moderate |
| Healthcare Practitioners and Technical Occupations (29-0000) | Cooper et al., 2020 <sup>59</sup>   | n=84  | Physical Therapists    | Cross-sectional survey                                                            | 06/10 - 08/07 | The United Kingdom       | 10.71%           | Moderate |
| Healthcare Practitioners and Technical Occupations (29-0000) | Costa et al., 2020 <sup>128</sup>   | n=159 | Physical Therapists    | Cross-sectional survey                                                            | 05/14 - 05/28 | Brazil                   | 10.7%            | Moderate |
| Healthcare Practitioners and Technical Occupations (29-0000) | Akinbami et al., 2020 <sup>46</sup> | n=409 | Respiratory Therapists | Cross-sectional survey                                                            | 05/18 - 06/13 | United States of America | 8.3% (5.8-11.4%) | Moderate |
| Healthcare Practitioners and Technical Occupations (29-0000) | Brunner et al., 2020 <sup>54</sup>  | n=42  | Respiratory Therapists | Cross-sectional survey                                                            | 05/04 - 05/29 | United States of America | 0%               | High     |
| Healthcare Practitioners and Technical Occupations (29-0000) | Godbout et al., 2020 <sup>138</sup> | n=25  | Respiratory Therapists | Cross-sectional survey                                                            | 07/27 - 10/02 | United States of America | 0%               | High     |
| Healthcare Practitioners and Technical Occupations (29-0000) | Hunter et al., 2020 <sup>21</sup>   | n=94  | Respiratory Therapists | Cross-sectional survey                                                            | 04/29 - 05/08 | United States of America | 0%               | High     |

|                                                              |                                      |        |                        |                        |               |                          |                 |          |
|--------------------------------------------------------------|--------------------------------------|--------|------------------------|------------------------|---------------|--------------------------|-----------------|----------|
| Healthcare Practitioners and Technical Occupations (29-0000) | Rosser et al., 2020 <sup>33</sup>    | n=135  | Respiratory Therapists | Cross-sectional survey | 04/20 - 05/20 | United States of America | 0%              | High     |
| Healthcare Practitioners and Technical Occupations (29-0000) | Self et al., 2020 <sup>154</sup>     | n=235  | Respiratory Therapists | Cross-sectional survey | 04/03 - 06/19 | United States of America | 4.26%           | Moderate |
| Healthcare Practitioners and Technical Occupations (29-0000) | Yogo et al., 2020 <sup>36</sup>      | n=121  | Respiratory Therapists | Cross-sectional survey | 05/20 - 06/08 | United States of America | 0%              | High     |
| Healthcare Practitioners and Technical Occupations (29-0000) | Rosser et al., 2020 <sup>33</sup>    | n=253  | Therapists, All Other  | Cross-sectional survey | 04/20 - 05/20 | United States of America | 1.58%           | High     |
| Healthcare Practitioners and Technical Occupations (29-0000) | Schmidt et al., 2020 <sup>148</sup>  | n=80   | Therapists, All Other  | Cross-sectional survey | 04/20 - 04/30 | Germany                  | 3.75%           | High     |
| Healthcare Practitioners and Technical Occupations (29-0000) | Yogo et al., 2020 <sup>36</sup>      | n=22   | Therapists, All Other  | Cross-sectional survey | 05/20 - 06/08 | United States of America | 4.55%           | High     |
| Healthcare Practitioners and Technical Occupations (29-0000) | Calcagno et al., 2020 <sup>124</sup> | n=13   | Veterinarians          | Cross-sectional survey | 04/17 - 05/20 | Italy                    | 0%              | Moderate |
| Healthcare Practitioners and                                 | Akinbami et al., 2020 <sup>46</sup>  | n=6426 | Registered Nurses      | Cross-sectional survey | 05/18 - 06/13 | United States of America | 7.7% (7.1-8.4%) | Moderate |

|                                                              |                                     |       |                   |                        |               |                    |                   |      |
|--------------------------------------------------------------|-------------------------------------|-------|-------------------|------------------------|---------------|--------------------|-------------------|------|
| Technical Occupations (29-0000)                              |                                     |       |                   |                        |               |                    |                   |      |
| Healthcare Practitioners and Technical Occupations (29-0000) | Alharbi et al., 2020 <sup>125</sup> | n=70  | Registered Nurses | Cross-sectional survey | 04/18 - 06/17 | Saudi Arabia       | 10%               | High |
| Healthcare Practitioners and Technical Occupations (29-0000) | Alharbi et al., 2020 <sup>125</sup> | n=9   | Registered Nurses | Cross-sectional survey | 04/18 - 06/17 | Saudi Arabia       | 33.33%            | High |
| Healthcare Practitioners and Technical Occupations (29-0000) | Alharbi et al., 2020 <sup>125</sup> | n=76  | Registered Nurses | Cross-sectional survey | 04/18 - 06/17 | Saudi Arabia       | 26.32%            | High |
| Healthcare Practitioners and Technical Occupations (29-0000) | Alharbi et al., 2020 <sup>125</sup> | n=21  | Registered Nurses | Cross-sectional survey | 04/18 - 06/17 | Saudi Arabia       | 14.29%            | High |
| Healthcare Practitioners and Technical Occupations (29-0000) | Alharbi et al., 2020 <sup>125</sup> | n=43  | Registered Nurses | Cross-sectional survey | 04/18 - 06/17 | Saudi Arabia       | 27.91%            | High |
| Healthcare Practitioners and Technical Occupations (29-0000) | Amendola et al., 2020 <sup>47</sup> | n=216 | Registered Nurses | Cross-sectional survey | 04/15 - 04/15 | Italy              | 6.02%             | High |
| Healthcare Practitioners and Technical                       | Bampoe et al., 2020 <sup>156</sup>  | n=52  | Registered Nurses | Cross-sectional survey | 05/11 - 06/05 | The United Kingdom | 13.5% (5.6-25.8%) | High |

|                                                              |                                       |        |                   |                                                                                   |               |                    |                   |          |
|--------------------------------------------------------------|---------------------------------------|--------|-------------------|-----------------------------------------------------------------------------------|---------------|--------------------|-------------------|----------|
| Occupations (29-0000)                                        |                                       |        |                   |                                                                                   |               |                    |                   |          |
| Healthcare Practitioners and Technical Occupations (29-0000) | Bampoe et al., 2020 <sup>156</sup>    | n=40   | Registered Nurses | Cross-sectional survey                                                            | 05/11 - 06/05 | The United Kingdom | 12.5% (4.2-26.8%) | High     |
| Healthcare Practitioners and Technical Occupations (29-0000) | Baracco et al., 2020 <sup>24</sup>    | n=1014 | Registered Nurses | Cross-sectional survey                                                            | 04/23 - 05/05 | Italy              | 17.9%             | High     |
| Healthcare Practitioners and Technical Occupations (29-0000) | Barallat et al., 2020 <sup>50</sup>   | n=2243 | Registered Nurses | Cross-sectional survey                                                            | 05/04 - 05/22 | Spain              | 10.64%            | High     |
| Healthcare Practitioners and Technical Occupations (29-0000) | Brehm et al., 2020 <sup>7</sup>       | n=444  | Registered Nurses | Cross sectional study with prospective cohort follow up of a subset of the sample | 03/20 - 07/17 | Germany            | 2.3%              | Moderate |
| Healthcare Practitioners and Technical Occupations (29-0000) | Brousseau et al., 2020 <sup>134</sup> | n=1189 | Registered Nurses | Cross-sectional survey                                                            | 07/06 - 09/24 | Canada             | 11.9%             | High     |
| Healthcare Practitioners and Technical Occupations (29-0000) | Calcagno et al., 2020 <sup>124</sup>  | n=1833 | Registered Nurses | Cross-sectional survey                                                            | 04/17 - 05/20 | Italy              | 8.18%             | Moderate |
| Healthcare Practitioners and Technical                       | Chau et al., 2020 <sup>126</sup>      | n=144  | Registered Nurses | Cross-sectional survey                                                            | 08/23 - 08/30 | Viet Nam           | 0%                | High     |

|                                                              |                                      |        |                   |                        |               |                          |        |          |
|--------------------------------------------------------------|--------------------------------------|--------|-------------------|------------------------|---------------|--------------------------|--------|----------|
| Occupations (29-0000)                                        |                                      |        |                   |                        |               |                          |        |          |
| Healthcare Practitioners and Technical Occupations (29-0000) | Chen et al., 2020 <sup>135</sup>     | n=25   | Registered Nurses | Cross-sectional survey | 02/19 - 02/19 | China                    | 8%     | High     |
| Healthcare Practitioners and Technical Occupations (29-0000) | Cooper et al., 2020 <sup>59</sup>    | n=3471 | Registered Nurses | Cross-sectional survey | 06/10 - 08/07 | The United Kingdom       | 7.52%  | Moderate |
| Healthcare Practitioners and Technical Occupations (29-0000) | Costa et al., 2020 <sup>128</sup>    | n=370  | Registered Nurses | Cross-sectional survey | 05/14 - 05/28 | Brazil                   | 11.4%  | Moderate |
| Healthcare Practitioners and Technical Occupations (29-0000) | Dimcheff et al., 2020 <sup>157</sup> | n=412  | Registered Nurses | Cross-sectional survey | 06/08 - 07/08 | United States of America | 7%     | Moderate |
| Healthcare Practitioners and Technical Occupations (29-0000) | Erber et al., 2020 <sup>31</sup>     | n=958  | Registered Nurses | Cross-sectional survey | 04/14 - 05/29 | Germany                  | 2.5%   | High     |
| Healthcare Practitioners and Technical Occupations (29-0000) | Favara et al., 2020 <sup>136</sup>   | n=45   | Registered Nurses | Prospective cohort     | 06/01 - 06/07 | The United Kingdom       | 28.89% | High     |
| Healthcare Practitioners and Technical Occupations (29-0000) | Favara et al., 2020 <sup>19</sup>    | n=237  | Registered Nurses | Cross-sectional survey | 07/13 - 07/13 | The United Kingdom       | 16.5%  | High     |



|                                                              |                                          |        |                   |                        |               |                          |        |          |
|--------------------------------------------------------------|------------------------------------------|--------|-------------------|------------------------|---------------|--------------------------|--------|----------|
| Healthcare Practitioners and Technical Occupations (29-0000) | Finkenzeller et al., 2020 <sup>158</sup> | n=251  | Registered Nurses | Prospective cohort     | 06/29 - 07/29 | Germany                  | 12%    | Moderate |
| Healthcare Practitioners and Technical Occupations (29-0000) | Finkenzeller et al., 2020 <sup>158</sup> | n=887  | Registered Nurses | Prospective cohort     | 06/29 - 07/29 | Germany                  | 20%    | Moderate |
| Healthcare Practitioners and Technical Occupations (29-0000) | Fujita et al., 2020 <sup>137</sup>       | n=50   | Registered Nurses | Cross-sectional survey | 04/10 - 04/20 | Japan                    | 6%     | High     |
| Healthcare Practitioners and Technical Occupations (29-0000) | Galan et al., 2020 <sup>20</sup>         | n=687  | Registered Nurses | Cross-sectional survey | 04/14 - 04/27 | Spain                    | 30.71% | High     |
| Healthcare Practitioners and Technical Occupations (29-0000) | Godbout et al., 2020 <sup>138</sup>      | n=937  | Registered Nurses | Cross-sectional survey | 07/27 - 10/02 | United States of America | 1.39%  | High     |
| Healthcare Practitioners and Technical Occupations (29-0000) | Goenka et al., 2020 <sup>25</sup>        | n=224  | Registered Nurses | Cross-sectional survey | 07/12 - 08/23 | India                    | 9.38%  | Moderate |
| Healthcare Practitioners and Technical Occupations (29-0000) | Goenka et al., 2020 <sup>26</sup>        | n=43   | Registered Nurses | Cross-sectional survey | 08/01 - 08/31 | India                    | 34.88% | High     |
| Healthcare Practitioners and                                 | Grant et al., 2020 <sup>159</sup>        | n=1345 | Registered Nurses | Cross-sectional survey | 05/15 - 06/05 | The United Kingdom       | 34.7%  | High     |

|                                                              |                                      |        |                   |                        |               |                          |                    |          |
|--------------------------------------------------------------|--------------------------------------|--------|-------------------|------------------------|---------------|--------------------------|--------------------|----------|
| Technical Occupations (29-0000)                              |                                      |        |                   |                        |               |                          |                    |          |
| Healthcare Practitioners and Technical Occupations (29-0000) | Grant et al., 2020 <sup>159</sup>    | n=108  | Registered Nurses | Cross-sectional survey | 05/15 - 06/05 | The United Kingdom       | 25%                | High     |
| Healthcare Practitioners and Technical Occupations (29-0000) | Hanrath et al., 2020 <sup>32</sup>   | n=749  | Registered Nurses | Cross-sectional survey | 05/29 - 07/06 | The United Kingdom       | 8.99%              | High     |
| Healthcare Practitioners and Technical Occupations (29-0000) | Haq et al., 2020 <sup>67</sup>       | n=209  | Registered Nurses | Cross-sectional survey | 06/15 - 06/29 | Pakistan                 | 38.8% (32.1-45.7%) | Moderate |
| Healthcare Practitioners and Technical Occupations (29-0000) | Houlihan et al., 2020 <sup>139</sup> | n=106  | Registered Nurses | Cross-sectional survey | 03/26 - 04/08 | The United Kingdom       | 24%                | High     |
| Healthcare Practitioners and Technical Occupations (29-0000) | Houlihan et al., 2020 <sup>139</sup> | n=22   | Registered Nurses | Cross-sectional survey | 03/26 - 04/08 | The United Kingdom       | 23%                | High     |
| Healthcare Practitioners and Technical Occupations (29-0000) | Hunter et al., 2020 <sup>21</sup>    | n=317  | Registered Nurses | Cross-sectional survey | 04/29 - 05/08 | United States of America | 2.2%               | High     |
| Healthcare Practitioners and Technical                       | Iversen et al., 2020 <sup>8</sup>    | n=9963 | Registered Nurses | Cross-sectional survey | 04/15 - 04/22 | Denmark                  | 4.03%              | Low      |

|                                                              |                                     |        |                   |                        |               |                          |        |      |
|--------------------------------------------------------------|-------------------------------------|--------|-------------------|------------------------|---------------|--------------------------|--------|------|
| Occupations (29-0000)                                        |                                     |        |                   |                        |               |                          |        |      |
| Healthcare Practitioners and Technical Occupations (29-0000) | Iversen et al., 2020 <sup>8</sup>   | n=1786 | Registered Nurses | Cross-sectional survey | 04/15 - 04/22 | Denmark                  | 4.65%  | Low  |
| Healthcare Practitioners and Technical Occupations (29-0000) | Jeremias et al., 2020 <sup>70</sup> | n=1043 | Registered Nurses | Cross-sectional survey | 03/01 - 04/30 | United States of America | 9.5%   | High |
| Healthcare Practitioners and Technical Occupations (29-0000) | Jones et al., 2020 <sup>29</sup>    | n=1962 | Registered Nurses | Cross-sectional survey | 01/15 - 06/15 | The United Kingdom       | 10.5%  | High |
| Healthcare Practitioners and Technical Occupations (29-0000) | Kassem et al., 2020 <sup>72</sup>   | n=28   | Registered Nurses | Cross-sectional survey | 06/01 - 06/14 | Egypt                    | 10.71% | High |
| Healthcare Practitioners and Technical Occupations (29-0000) | Kassem et al., 2020 <sup>72</sup>   | n=28   | Registered Nurses | Cross-sectional survey | 06/01 - 06/14 | Egypt                    | 7.14%  | High |
| Healthcare Practitioners and Technical Occupations (29-0000) | Kassem et al., 2020 <sup>72</sup>   | n=28   | Registered Nurses | Cross-sectional survey | 06/01 - 06/14 | Egypt                    | 3.57%  | High |
| Healthcare Practitioners and Technical Occupations (29-0000) | Kassem et al., 2020 <sup>72</sup>   | n=28   | Registered Nurses | Cross-sectional survey | 06/01 - 06/14 | Egypt                    | 0%     | High |

|                                                              |                                     |        |                   |                                                                                   |               |                          |                  |          |
|--------------------------------------------------------------|-------------------------------------|--------|-------------------|-----------------------------------------------------------------------------------|---------------|--------------------------|------------------|----------|
| Healthcare Practitioners and Technical Occupations (29-0000) | Khan et al., 2020 <sup>127</sup>    | n=321  | Registered Nurses | Cross-sectional survey                                                            | 06/15 - 06/29 | India                    | 2.8% (1.5-5.3%)  | Moderate |
| Healthcare Practitioners and Technical Occupations (29-0000) | Kohler et al., 2020 <sup>141</sup>  | n=398  | Registered Nurses | Cross-sectional survey                                                            | 03/19 - 04/03 | Switzerland              | 0.75%            | High     |
| Healthcare Practitioners and Technical Occupations (29-0000) | Kumar et al., 2020 <sup>142</sup>   | n=308  | Registered Nurses | Cross-sectional survey                                                            | 06/01 - 06/30 | India                    | 6.8% (4.5-10.2%) | High     |
| Healthcare Practitioners and Technical Occupations (29-0000) | Leidner et al., 2020 <sup>22</sup>  | n=110  | Registered Nurses | Cross sectional study with prospective cohort follow up of a subset of the sample | 04/08 - 05/22 | United States of America | 0%               | High     |
| Healthcare Practitioners and Technical Occupations (29-0000) | Leidner et al., 2020 <sup>22</sup>  | n=3504 | Registered Nurses | Cross sectional study with prospective cohort follow up of a subset of the sample | 04/08 - 05/22 | United States of America | 2.34%            | High     |
| Healthcare Practitioners and Technical Occupations (29-0000) | Lumley et al., 2020 <sup>9</sup>    | n=4528 | Registered Nurses | Prospective cohort                                                                | 04/23 - 11/30 | The United Kingdom       | 13.21%           | Moderate |
| Healthcare Practitioners and Technical Occupations (29-0000) | Mansour et al., 2020 <sup>160</sup> | n=285  | Registered Nurses | Cross-sectional survey                                                            | 03/24 - 04/04 | United States of America | 32.63%           | High     |

|                                                    |                                                              |                                      |         |                   |                        |               |                          |       |          |
|----------------------------------------------------|--------------------------------------------------------------|--------------------------------------|---------|-------------------|------------------------|---------------|--------------------------|-------|----------|
| 1<br>2<br>3<br>4<br>5<br>6<br>7                    | Healthcare Practitioners and Technical Occupations (29-0000) | Martin et al., 2020 <sup>161</sup>   | n=580   | Registered Nurses | Cross-sectional survey | 04/01 - 04/15 | Spain                    | 5.52% | High     |
| 8<br>9<br>10<br>11<br>12                           | Healthcare Practitioners and Technical Occupations (29-0000) | Martin et al., 2020 <sup>161</sup>   | n=74    | Registered Nurses | Cross-sectional survey | 04/01 - 04/15 | Spain                    | 9.46% | High     |
| 13<br>14<br>15<br>16<br>17<br>18                   | Healthcare Practitioners and Technical Occupations (29-0000) | Martin et al., 2020 <sup>161</sup>   | n=676   | Registered Nurses | Cross-sectional survey | 04/01 - 04/15 | Spain                    | 5.92% | High     |
| 19<br>20<br>21<br>22<br>23                         | Healthcare Practitioners and Technical Occupations (29-0000) | Martin et al., 2020 <sup>161</sup>   | n=337   | Registered Nurses | Cross-sectional survey | 04/01 - 04/15 | Spain                    | 5.93% | High     |
| 24<br>25<br>26<br>27<br>28                         | Healthcare Practitioners and Technical Occupations (29-0000) | Martin et al., 2020 <sup>161</sup>   | n=339   | Registered Nurses | Cross-sectional survey | 04/01 - 04/15 | Spain                    | 5.9%  | High     |
| 29<br>30<br>31<br>32<br>33                         | Healthcare Practitioners and Technical Occupations (29-0000) | Meissner et al., 2020 <sup>162</sup> | n=439   | Registered Nurses | Cross-sectional survey | 04/14 - 05/06 | United States of America | 1.37% | High     |
| 34<br>35<br>36<br>37<br>38                         | Healthcare Practitioners and Technical Occupations (29-0000) | Mohr et al., 2020 <sup>129</sup>     | n=410   | Registered Nurses | Cross-sectional survey | 05/13 - 07/08 | United States of America | 1.46% | Moderate |
| 39<br>40<br>41<br>42<br>43<br>44<br>45<br>46<br>47 | Healthcare Practitioners and                                 | Moscola et al., 2020 <sup>89</sup>   | n=11468 | Registered Nurses | Cross-sectional survey | 04/20 - 06/23 | United States of America | 13.1% | High     |

|                                                              |                                      |        |                   |                                                                                   |               |                            |                  |          |
|--------------------------------------------------------------|--------------------------------------|--------|-------------------|-----------------------------------------------------------------------------------|---------------|----------------------------|------------------|----------|
| Technical Occupations (29-0000)                              |                                      |        |                   |                                                                                   |               |                            |                  |          |
| Healthcare Practitioners and Technical Occupations (29-0000) | Mostafa et al., 2020 <sup>163</sup>  | n=4040 | Registered Nurses | Cross-sectional survey                                                            | 04/22 - 05/14 | Egypt                      | 1.31%            | High     |
| Healthcare Practitioners and Technical Occupations (29-0000) | Nishida et al., 2020 <sup>90</sup>   | n=489  | Registered Nurses | Cross-sectional survey                                                            | 06/12 - 06/19 | Japan                      | 0.2% (0.04-1.1%) | Moderate |
| Healthcare Practitioners and Technical Occupations (29-0000) | Noor et al., 2020 <sup>130</sup>     | n=460  | Registered Nurses | Cross-sectional survey                                                            | 07/13 - 07/15 | Pakistan                   | 39.78%           | Moderate |
| Healthcare Practitioners and Technical Occupations (29-0000) | Paradiso et al., 2020 <sup>164</sup> | n=606  | Registered Nurses | Cross sectional study with prospective cohort follow up of a subset of the sample | 03/26 - 04/17 | Italy                      | 0.33%            | High     |
| Healthcare Practitioners and Technical Occupations (29-0000) | Plebani et al., 2020 <sup>146</sup>  | n=3230 | Registered Nurses | Cross-sectional survey                                                            | 02/22 - 05/29 | Italy                      | 4.7% (4-5.5%)    | High     |
| Healthcare Practitioners and Technical Occupations (29-0000) | Poustchi et al., 2020 <sup>28</sup>  | n=1245 | Registered Nurses | Cross-sectional survey                                                            | 04/17 - 06/02 | Iran (Islamic Republic of) | 15.9% (13.9-18%) | Moderate |
| Healthcare Practitioners and Technical                       | Rudberg et al., 2020 <sup>147</sup>  | n=636  | Registered Nurses | Cross-sectional survey                                                            | 04/14 - 05/08 | Sweden                     | 21.9%            | Moderate |

|                                                              |                                      |        |                   |                        |               |                          |                  |          |
|--------------------------------------------------------------|--------------------------------------|--------|-------------------|------------------------|---------------|--------------------------|------------------|----------|
| Occupations (29-0000)                                        |                                      |        |                   |                        |               |                          |                  |          |
| Healthcare Practitioners and Technical Occupations (29-0000) | Schmidt et al., 2020 <sup>148</sup>  | n=154  | Registered Nurses | Cross-sectional survey | 04/20 - 04/30 | Germany                  | 0%               | High     |
| Healthcare Practitioners and Technical Occupations (29-0000) | Self et al., 2020 <sup>154</sup>     | n=1445 | Registered Nurses | Cross-sectional survey | 04/03 - 06/19 | United States of America | 5.05%            | Moderate |
| Healthcare Practitioners and Technical Occupations (29-0000) | Siddiqui et al., 2020 <sup>2</sup>   | n=59   | Registered Nurses | Prospective cohort     | 04/15 - 08/15 | India                    | 10.2%            | High     |
| Healthcare Practitioners and Technical Occupations (29-0000) | Siddiqui et al., 2020 <sup>2</sup>   | n=70   | Registered Nurses | Prospective cohort     | 04/15 - 08/15 | India                    | 10%              | High     |
| Healthcare Practitioners and Technical Occupations (29-0000) | Sotgiu et al., 2020 <sup>149</sup>   | n=64   | Registered Nurses | Cross-sectional survey | 04/02 - 04/16 | Italy                    | 7.8% (1.2-14.4%) | High     |
| Healthcare Practitioners and Technical Occupations (29-0000) | Sydney et al., 2020 <sup>165</sup>   | n=81   | Registered Nurses | Cross-sectional survey | 04/28 - 05/04 | United States of America | 18.52%           | High     |
| Healthcare Practitioners and Technical Occupations (29-0000) | Urbietta et al., 2020 <sup>132</sup> | n=83   | Registered Nurses | Cross-sectional survey | 04/14 - 04/16 | Spain                    | 4.8%             | High     |

|                                                              |                                       |        |                                      |                        |               |                          |                 |          |
|--------------------------------------------------------------|---------------------------------------|--------|--------------------------------------|------------------------|---------------|--------------------------|-----------------|----------|
| Healthcare Practitioners and Technical Occupations (29-0000) | Urbietta et al., 2020 <sup>132</sup>  | n=23   | Registered Nurses                    | Cross-sectional survey | 04/14 - 04/16 | Spain                    | 8.7%            | High     |
| Healthcare Practitioners and Technical Occupations (29-0000) | Venugopal et al., 2020 <sup>150</sup> | n=142  | Registered Nurses                    | Cross-sectional survey | 03/01 - 05/01 | United States of America | 28%             | Moderate |
| Healthcare Practitioners and Technical Occupations (29-0000) | Yogo et al., 2020 <sup>36</sup>       | n=1129 | Registered Nurses                    | Cross-sectional survey | 05/20 - 06/08 | United States of America | 2.48%           | High     |
| Healthcare Practitioners and Technical Occupations (29-0000) | Yogo et al., 2020 <sup>36</sup>       | n=12   | Registered Nurses                    | Cross-sectional survey | 05/20 - 06/08 | United States of America | 0%              | High     |
| Healthcare Practitioners and Technical Occupations (29-0000) | Zhou et al., 2020 <sup>166</sup>      | n=2406 | Registered Nurses                    | Cross-sectional survey | 03/16 - 03/25 | China                    | 1.37%           | Moderate |
| Healthcare Practitioners and Technical Occupations (29-0000) | Godbout et al., 2020 <sup>138</sup>   | n=141  | Nurse Practitioners                  | Cross-sectional survey | 07/27 - 10/02 | United States of America | 1.42%           | High     |
| Healthcare Practitioners and Technical Occupations (29-0000) | Dimcheff et al., 2020 <sup>157</sup>  | n=214  | Nurse Practitioners                  | Cross-sectional survey | 06/08 - 07/08 | United States of America | 3.7%            | Moderate |
| Healthcare Practitioners and                                 | Akinbami et al., 2020 <sup>46</sup>   | n=719  | Health Technologists and Technicians | Cross-sectional survey | 05/18 - 06/13 | United States of America | 4.2% (2.8-5.9%) | Moderate |



|                                                              |                                     |       |                                                   |                        |               |                          |                 |          |
|--------------------------------------------------------------|-------------------------------------|-------|---------------------------------------------------|------------------------|---------------|--------------------------|-----------------|----------|
| Technical Occupations (29-0000)                              |                                     |       |                                                   |                        |               |                          |                 |          |
| Healthcare Practitioners and Technical Occupations (29-0000) | Blairon et al., 2020 <sup>52</sup>  | n=61  | Health Technologists and Technicians              | Cross-sectional survey | 05/25 - 06/19 | Belgium                  | 6.6%            | High     |
| Healthcare Practitioners and Technical Occupations (29-0000) | Yogo et al., 2020 <sup>36</sup>     | n=65  | Health Technologists and Technicians              | Cross-sectional survey | 05/20 - 06/08 | United States of America | 4.62%           | High     |
| Healthcare Practitioners and Technical Occupations (29-0000) | Silva et al., 2020 <sup>34</sup>    | n=224 | Clinical Laboratory Technologists and Technicians | Cross-sectional survey | 06/05 - 07/31 | Brazil                   | 7.59%           | High     |
| Healthcare Practitioners and Technical Occupations (29-0000) | Costa et al., 2020 <sup>128</sup>   | n=66  | Medical and Clinical Laboratory Technologists     | Cross-sectional survey | 05/14 - 05/28 | Brazil                   | 3%              | Moderate |
| Healthcare Practitioners and Technical Occupations (29-0000) | Akinbami et al., 2020 <sup>46</sup> | n=293 | Medical and Clinical Laboratory Technicians       | Cross-sectional survey | 05/18 - 06/13 | United States of America | 3.4% (1.7-6.2%) | Moderate |
| Healthcare Practitioners and Technical Occupations (29-0000) | Akinbami et al., 2020 <sup>46</sup> | n=365 | Medical and Clinical Laboratory Technicians       | Cross-sectional survey | 05/18 - 06/13 | United States of America | 5.5% (3.4-8.3%) | Moderate |
| Healthcare Practitioners and Technical                       | Alharbi et al., 2020 <sup>125</sup> | n=80  | Medical and Clinical Laboratory Technicians       | Cross-sectional survey | 04/18 - 06/17 | Saudi Arabia             | 20%             | High     |

|                                                              |                                      |       |                                             |                                                                                   |               |          |        |          |
|--------------------------------------------------------------|--------------------------------------|-------|---------------------------------------------|-----------------------------------------------------------------------------------|---------------|----------|--------|----------|
| Occupations (29-0000)                                        |                                      |       |                                             |                                                                                   |               |          |        |          |
| Healthcare Practitioners and Technical Occupations (29-0000) | Baracco et al., 2020 <sup>24</sup>   | n=256 | Medical and Clinical Laboratory Technicians | Cross-sectional survey                                                            | 04/23 - 05/05 | Italy    | 12.1%  | High     |
| Healthcare Practitioners and Technical Occupations (29-0000) | Brehm et al., 2020 <sup>7</sup>      | n=105 | Medical and Clinical Laboratory Technicians | Cross sectional study with prospective cohort follow up of a subset of the sample | 03/20 - 07/17 | Germany  | 0%     | Moderate |
| Healthcare Practitioners and Technical Occupations (29-0000) | Calcagno et al., 2020 <sup>124</sup> | n=216 | Medical and Clinical Laboratory Technicians | Cross-sectional survey                                                            | 04/17 - 05/20 | Italy    | 6.94%  | Moderate |
| Healthcare Practitioners and Technical Occupations (29-0000) | Calcagno et al., 2020 <sup>124</sup> | n=157 | Medical and Clinical Laboratory Technicians | Cross-sectional survey                                                            | 04/17 - 05/20 | Italy    | 11.46% | Moderate |
| Healthcare Practitioners and Technical Occupations (29-0000) | Chau et al., 2020 <sup>126</sup>     | n=33  | Medical and Clinical Laboratory Technicians | Cross-sectional survey                                                            | 08/23 - 08/30 | Viet Nam | 0%     | High     |
| Healthcare Practitioners and Technical Occupations (29-0000) | Galan et al., 2020 <sup>20</sup>     | n=192 | Medical and Clinical Laboratory Technicians | Cross-sectional survey                                                            | 04/14 - 04/27 | Spain    | 21.35% | High     |
| Healthcare Practitioners and Technical                       | Goenka et al., 2020 <sup>25</sup>    | n=72  | Medical and Clinical Laboratory Technicians | Cross-sectional survey                                                            | 07/12 - 08/23 | India    | 15.28% | Moderate |

|                                                              |                                    |        |                                             |                        |               |                          |                  |          |
|--------------------------------------------------------------|------------------------------------|--------|---------------------------------------------|------------------------|---------------|--------------------------|------------------|----------|
| Occupations (29-0000)                                        |                                    |        |                                             |                        |               |                          |                  |          |
| Healthcare Practitioners and Technical Occupations (29-0000) | Haq et al., 2020 <sup>67</sup>     | n=32   | Medical and Clinical Laboratory Technicians | Cross-sectional survey | 06/15 - 06/29 | Pakistan                 | 50% (31.8-68.1%) | Moderate |
| Healthcare Practitioners and Technical Occupations (29-0000) | Iversen et al., 2020 <sup>8</sup>  | n=1292 | Medical and Clinical Laboratory Technicians | Cross-sectional survey | 04/15 - 04/22 | Denmark                  | 1.93%            | Low      |
| Healthcare Practitioners and Technical Occupations (29-0000) | Khan et al., 2020 <sup>127</sup>   | n=397  | Medical and Clinical Laboratory Technicians | Cross-sectional survey | 06/15 - 06/29 | India                    | 2.5% (1.4-4.6%)  | Moderate |
| Healthcare Practitioners and Technical Occupations (29-0000) | Lumley et al., 2020 <sup>9</sup>   | n=452  | Medical and Clinical Laboratory Technicians | Prospective cohort     | 04/23 - 11/30 | The United Kingdom       | 8.63%            | Moderate |
| Healthcare Practitioners and Technical Occupations (29-0000) | Nishida et al., 2020 <sup>90</sup> | n=140  | Medical and Clinical Laboratory Technicians | Cross-sectional survey | 06/12 - 06/19 | Japan                    | 0%               | Moderate |
| Healthcare Practitioners and Technical Occupations (29-0000) | Rosser et al., 2020 <sup>33</sup>  | n=225  | Medical and Clinical Laboratory Technicians | Cross-sectional survey | 04/20 - 05/20 | United States of America | 0.44%            | High     |
| Healthcare Practitioners and Technical Occupations (29-0000) | Iversen et al., 2020 <sup>8</sup>  | n=342  | Radiologic Technologists                    | Cross-sectional survey | 04/15 - 04/22 | Denmark                  | 3.51%            | Low      |

|                                                              |                                     |        |                                              |                        |               |                          |                  |          |
|--------------------------------------------------------------|-------------------------------------|--------|----------------------------------------------|------------------------|---------------|--------------------------|------------------|----------|
| Healthcare Practitioners and Technical Occupations (29-0000) | Martin et al., 2020 <sup>23</sup>   | n=241  | Radiologic Technologists                     | Cross-sectional survey | 05/29 - 07/13 | The United Kingdom       | 9.96%            | Moderate |
| Healthcare Practitioners and Technical Occupations (29-0000) | Akinbami et al., 2020 <sup>46</sup> | n=1158 | Emergency Medical Technicians and Paramedics | Cross-sectional survey | 05/18 - 06/13 | United States of America | 5.2% (4-6.6%)    | Moderate |
| Healthcare Practitioners and Technical Occupations (29-0000) | Buntinx et al., 2020 <sup>167</sup> | n=10   | Emergency Medical Technicians and Paramedics | Cross-sectional survey | 04/14 - 04/16 | Belgium                  | 10%              | High     |
| Healthcare Practitioners and Technical Occupations (29-0000) | Haq et al., 2020 <sup>67</sup>      | n=157  | Emergency Medical Technicians and Paramedics | Cross-sectional survey | 06/15 - 06/29 | Pakistan                 | 42% (34.2-50.1%) | Moderate |
| Healthcare Practitioners and Technical Occupations (29-0000) | Iversen et al., 2020 <sup>8</sup>   | n=323  | Emergency Medical Technicians and Paramedics | Cross-sectional survey | 04/15 - 04/22 | Denmark                  | 4.95%            | Low      |
| Healthcare Practitioners and Technical Occupations (29-0000) | Mesnil et al., 2020 <sup>143</sup>  | n=212  | Emergency Medical Technicians and Paramedics | Cross-sectional survey | 06/08 - 06/22 | France                   | 11%              | High     |
| Healthcare Practitioners and Technical Occupations (29-0000) | Reuben et al., 2020 <sup>168</sup>  | n=10   | Emergency Medical Technicians and Paramedics | Cross-sectional survey | 05/28 - 07/15 | United States of America | 0%               | High     |

|                                                              |                                       |       |                                                 |                        |               |                            |        |          |
|--------------------------------------------------------------|---------------------------------------|-------|-------------------------------------------------|------------------------|---------------|----------------------------|--------|----------|
| Healthcare Practitioners and Technical Occupations (29-0000) | Saberian et al., 2020 <sup>169</sup>  | n=243 | Emergency Medical Technicians and Paramedics    | Cross-sectional survey | 03/20 - 05/20 | Iran (Islamic Republic of) | 41.56% | High     |
| Healthcare Practitioners and Technical Occupations (29-0000) | Self et al., 2020 <sup>154</sup>      | n=56  | Emergency Medical Technicians and Paramedics    | Cross-sectional survey | 04/03 - 06/19 | United States of America   | 5.36%  | Moderate |
| Healthcare Practitioners and Technical Occupations (29-0000) | Tarabichi et al., 2020 <sup>170</sup> | n=111 | Emergency Medical Technicians and Paramedics    | Cross-sectional survey | 04/20 - 05/19 | United States of America   | 5.41%  | High     |
| Healthcare Practitioners and Technical Occupations (29-0000) | Baracco et al., 2020 <sup>24</sup>    | n=188 | Health Technologists and Technicians, All Other | Cross-sectional survey | 04/23 - 05/05 | Italy                      | 13.8%  | High     |
| Healthcare Practitioners and Technical Occupations (29-0000) | Chau et al., 2020 <sup>126</sup>      | n=22  | Health Technologists and Technicians, All Other | Cross-sectional survey | 08/23 - 08/30 | Viet Nam                   | 0%     | High     |
| Healthcare Practitioners and Technical Occupations (29-0000) | Goenka et al., 2020 <sup>25</sup>     | n=99  | Health Technologists and Technicians, All Other | Cross-sectional survey | 07/12 - 08/23 | India                      | 12.12% | Moderate |
| Healthcare Practitioners and Technical Occupations (29-0000) | Goenka et al., 2020 <sup>26</sup>     | n=16  | Health Technologists and Technicians, All Other | Cross-sectional survey | 08/01 - 08/31 | India                      | 68.75% | High     |
| Healthcare Support                                           | Jeremias et al., 2020 <sup>70</sup>   | n=155 | Healthcare Support Occupations                  | Cross-sectional survey | 03/01 - 04/30 | United States of America   | 5.8%   | High     |

|                                          |                                          |       |                                             |                        |               |                          |                      |          |
|------------------------------------------|------------------------------------------|-------|---------------------------------------------|------------------------|---------------|--------------------------|----------------------|----------|
| Occupations (31-0000)                    |                                          |       |                                             |                        |               |                          |                      |          |
| Healthcare Support Occupations (31-0000) | Ward et al., 2020 <sup>113</sup>         | n=979 | Nursing, Psychiatric, and Home Health Aides | Cross-sectional survey | 09/15 - 09/28 | The United Kingdom       | 11.09% (8.96-13.59%) | Moderate |
| Healthcare Support Occupations (31-0000) | Ward et al., 2020 <sup>113</sup>         | n=257 | Nursing, Psychiatric, and Home Health Aides | Cross-sectional survey | 09/15 - 09/28 | The United Kingdom       | 8.95%                | Moderate |
| Healthcare Support Occupations (31-0000) | Vijh et al., 2020 <sup>171</sup>         | n=169 | Nursing, Psychiatric, and Home Health Aides | Cross-sectional survey | 05/04 - 05/14 | Canada                   | 26.63%               | High     |
| Healthcare Support Occupations (31-0000) | Akinbami et al., 2020 <sup>46</sup>      | n=641 | Nursing Assistants                          | Cross-sectional survey | 05/18 - 06/13 | United States of America | 12.8% (10.3-15.6%)   | Moderate |
| Healthcare Support Occupations (31-0000) | Bampoe et al., 2020 <sup>156</sup>       | n=108 | Nursing Assistants                          | Cross-sectional survey | 05/11 - 06/05 | The United Kingdom       | 15.7% (9.5-24%)      | High     |
| Healthcare Support Occupations (31-0000) | Baracco et al., 2020 <sup>24</sup>       | n=257 | Nursing Assistants                          | Cross-sectional survey | 04/23 - 05/05 | Italy                    | 22.2%                | High     |
| Healthcare Support Occupations (31-0000) | Barallat et al., 2020 <sup>50</sup>      | n=832 | Nursing Assistants                          | Cross-sectional survey | 05/04 - 05/22 | Spain                    | 13.94%               | High     |
| Healthcare Support Occupations (31-0000) | Bhattacharya et al., 2020 <sup>172</sup> | n=121 | Nursing Assistants                          | Cross-sectional survey | 06/01 - 06/15 | United States of America | 1.65%                | High     |
| Healthcare Support                       | Brousseau et al., 2020 <sup>134</sup>    | n=132 | Nursing Assistants                          | Cross-sectional survey | 07/06 - 09/24 | Canada                   | 16.7%                | High     |

|                                          |                                      |        |                    |                        |               |                          |        |          |
|------------------------------------------|--------------------------------------|--------|--------------------|------------------------|---------------|--------------------------|--------|----------|
| Occupations (31-0000)                    |                                      |        |                    |                        |               |                          |        |          |
| Healthcare Support Occupations (31-0000) | Brunner et al., 2020 <sup>54</sup>   | n=95   | Nursing Assistants | Cross-sectional survey | 05/04 - 05/29 | United States of America | 1.05%  | High     |
| Healthcare Support Occupations (31-0000) | Brzostek et al., 2020 <sup>151</sup> | n=570  | Nursing Assistants | Cross-sectional survey | 04/17 - 05/07 | United States of America | 39.5%  | Moderate |
| Healthcare Support Occupations (31-0000) | Brzostek et al., 2020 <sup>151</sup> | n=263  | Nursing Assistants | Cross-sectional survey | 04/17 - 05/07 | United States of America | 45.6%  | Moderate |
| Healthcare Support Occupations (31-0000) | Calcagno et al., 2020 <sup>124</sup> | n=476  | Nursing Assistants | Cross-sectional survey | 04/17 - 05/20 | Italy                    | 9.24%  | Moderate |
| Healthcare Support Occupations (31-0000) | Costa et al., 2020 <sup>128</sup>    | n=553  | Nursing Assistants | Cross-sectional survey | 05/14 - 05/28 | Brazil                   | 10.5%  | Moderate |
| Healthcare Support Occupations (31-0000) | Galan et al., 2020 <sup>20</sup>     | n=472  | Nursing Assistants | Cross-sectional survey | 04/14 - 04/27 | Spain                    | 33.26% | High     |
| Healthcare Support Occupations (31-0000) | Garcia et al., 2020 <sup>173</sup>   | n=2424 | Nursing Assistants | Cross-sectional survey | 05/01 - 05/30 | Spain                    | 22.4%  | High     |
| Healthcare Support Occupations (31-0000) | Garcia et al., 2020 <sup>174</sup>   | n=2424 | Nursing Assistants | Cross-sectional survey | 05/01 - 05/30 | Spain                    | 22.4%  | High     |
| Healthcare Support                       | Hanrath et al., 2020 <sup>32</sup>   | n=1434 | Nursing Assistants | Cross-sectional survey | 05/29 - 07/06 | The United Kingdom       | 11.44% | High     |

|                                          |                                       |        |                    |                        |               |                          |               |          |
|------------------------------------------|---------------------------------------|--------|--------------------|------------------------|---------------|--------------------------|---------------|----------|
| Occupations (31-0000)                    |                                       |        |                    |                        |               |                          |               |          |
| Healthcare Support Occupations (31-0000) | Iversen et al., 2020 <sup>8</sup>     | n=501  | Nursing Assistants | Cross-sectional survey | 04/15 - 04/22 | Denmark                  | 1.2%          | Low      |
| Healthcare Support Occupations (31-0000) | Khan et al., 2020 <sup>127</sup>      | n=624  | Nursing Assistants | Cross-sectional survey | 06/15 - 06/29 | India                    | 2.4% (1.5-4%) | Moderate |
| Healthcare Support Occupations (31-0000) | Mughal et al., 2020 <sup>175</sup>    | n=121  | Nursing Assistants | Cross-sectional survey | 05/14 - 05/19 | United States of America | 0.83%         | High     |
| Healthcare Support Occupations (31-0000) | Rao et al., 2020 <sup>176</sup>       | n=1000 | Nursing Assistants | Cross-sectional survey | 05/23 - 06/06 | India                    | 1%            | Unclear  |
| Healthcare Support Occupations (31-0000) | Rudberg et al., 2020 <sup>147</sup>   | n=428  | Nursing Assistants | Cross-sectional survey | 04/14 - 05/08 | Sweden                   | 25.5%         | Moderate |
| Healthcare Support Occupations (31-0000) | Siddiqui et al., 2020 <sup>2</sup>    | n=28   | Nursing Assistants | Prospective cohort     | 04/15 - 08/15 | India                    | 10.7%         | High     |
| Healthcare Support Occupations (31-0000) | Yogo et al., 2020 <sup>36</sup>       | n=154  | Nursing Assistants | Cross-sectional survey | 05/20 - 06/08 | United States of America | 3.24%         | High     |
| Healthcare Support Occupations (31-0000) | Brousseau et al., 2020 <sup>134</sup> | n=201  | Orderlies          | Cross-sectional survey | 07/06 - 09/24 | Canada                   | 17.9%         | High     |
| Healthcare Support                       | Kassem et al., 2020 <sup>72</sup>     | n=9    | Orderlies          | Cross-sectional survey | 06/01 - 06/14 | Egypt                    | 0%            | High     |



|                                          |                                    |        |                                       |                        |               |                          |        |          |
|------------------------------------------|------------------------------------|--------|---------------------------------------|------------------------|---------------|--------------------------|--------|----------|
| Occupations (31-0000)                    |                                    |        |                                       |                        |               |                          |        |          |
| Healthcare Support Occupations (31-0000) | Kassem et al., 2020 <sup>72</sup>  | n=9    | Orderlies                             | Cross-sectional survey | 06/01 - 06/14 | Egypt                    | 33.33% | High     |
| Healthcare Support Occupations (31-0000) | Kassem et al., 2020 <sup>72</sup>  | n=9    | Orderlies                             | Cross-sectional survey | 06/01 - 06/14 | Egypt                    | 11.11% | High     |
| Healthcare Support Occupations (31-0000) | Kassem et al., 2020 <sup>72</sup>  | n=9    | Orderlies                             | Cross-sectional survey | 06/01 - 06/14 | Egypt                    | 22.22% | High     |
| Healthcare Support Occupations (31-0000) | Hanrath et al., 2020 <sup>32</sup> | n=122  | Orderlies                             | Cross-sectional survey | 05/29 - 07/06 | The United Kingdom       | 9.02%  | High     |
| Healthcare Support Occupations (31-0000) | Lumley et al., 2020 <sup>9</sup>   | n=377  | Orderlies                             | Prospective cohort     | 04/23 - 11/30 | The United Kingdom       | 15.38% | Moderate |
| Healthcare Support Occupations (31-0000) | Rosser et al., 2020 <sup>33</sup>  | n=3959 | Medical Assistants                    | Cross-sectional survey | 04/20 - 05/20 | United States of America | 1.39%  | High     |
| Healthcare Support Occupations (31-0000) | Yogo et al., 2020 <sup>36</sup>    | n=106  | Phlebotomists                         | Cross-sectional survey | 05/20 - 06/08 | United States of America | 0%     | High     |
| Healthcare Support Occupations (31-0000) | Cavlek et al., 2020 <sup>56</sup>  | n=300  | Healthcare Support Workers, All Other | Cross-sectional survey | 04/25 - 05/24 | Croatia                  | 0.67%  | High     |
| Healthcare Support                       | Erber et al., 2020 <sup>31</sup>   | n=383  | Healthcare Support Workers, All Other | Cross-sectional survey | 04/14 - 05/29 | Germany                  | 2.34%  | High     |

|                                          |                                       |        |                                                                |                        |               |                          |                 |          |
|------------------------------------------|---------------------------------------|--------|----------------------------------------------------------------|------------------------|---------------|--------------------------|-----------------|----------|
| Occupations (31-0000)                    |                                       |        |                                                                |                        |               |                          |                 |          |
| Healthcare Support Occupations (31-0000) | Khan et al., 2020 <sup>127</sup>      | n=141  | Healthcare Support Workers, All Other                          | Cross-sectional survey | 06/15 - 06/29 | India                    | 0%              | Moderate |
| Protective Service Occupations (33-0000) | Shukla et al., 2020 <sup>177</sup>    | n=1713 | Protective Service Occupations                                 | Cross-sectional survey | 04/24 - 05/21 | United States of America | 1.46%           | Moderate |
| Protective Service Occupations (33-0000) | Martinez et al., 2020 <sup>121</sup>  | n=18   | First-Line Supervisors of Fire Fighting and Prevention Workers | Cross-sectional survey | 04/16 - 04/17 | United States of America | 0%              | High     |
| Protective Service Occupations (33-0000) | Martinez et al., 2020 <sup>121</sup>  | n=47   | First-Line Supervisors of Fire Fighting and Prevention Workers | Cross-sectional survey | 04/16 - 04/17 | United States of America | 14.89%          | High     |
| Protective Service Occupations (33-0000) | Martinez et al., 2020 <sup>121</sup>  | n=13   | First-Line Supervisors of Fire Fighting and Prevention Workers | Cross-sectional survey | 04/16 - 04/17 | United States of America | 7.69%           | High     |
| Protective Service Occupations (33-0000) | Akinbami et al., 2020 <sup>46</sup>   | n=330  | Firefighters                                                   | Cross-sectional survey | 05/18 - 06/13 | United States of America | 6.7% (4.2-9.9%) | Moderate |
| Protective Service Occupations (33-0000) | Gray et al., 2020 <sup>178</sup>      | n=132  | Firefighters                                                   | Cross-sectional survey | 05/01 - 05/31 | United States of America | 14%             | High     |
| Protective Service Occupations (33-0000) | Reuben et al., 2020 <sup>168</sup>    | n=62   | Firefighters                                                   | Cross-sectional survey | 05/28 - 07/15 | United States of America | 4.84%           | High     |
| Protective Service Occupations (33-0000) | Sabourin et al., 2020 <sup>35</sup>   | n=42   | Firefighters                                                   | Cross-sectional survey | 07/15 - 08/15 | United States of America | 2.38%           | High     |
| Protective Service Occupations (33-0000) | Tarabichi et al., 2020 <sup>170</sup> | n=185  | Firefighters                                                   | Cross-sectional survey | 04/20 - 05/19 | United States of America | 5.41%           | High     |

|                                          |                                      |        |                                      |                        |               |                          |               |          |
|------------------------------------------|--------------------------------------|--------|--------------------------------------|------------------------|---------------|--------------------------|---------------|----------|
| Protective Service Occupations (33-0000) | Martinez et al., 2020 <sup>121</sup> | n=7    | Fire Inspectors and Investigators    | Cross-sectional survey | 04/16 - 04/17 | United States of America | 14.29%        | High     |
| Protective Service Occupations (33-0000) | Akinbami et al., 2020 <sup>46</sup>  | n=785  | Police and Sheriff's Patrol Officers | Cross-sectional survey | 05/18 - 06/13 | United States of America | 4% (2.7-5.6%) | Moderate |
| Protective Service Occupations (33-0000) | Chughtai et al., 2020 <sup>179</sup> | n=154  | Police and Sheriff's Patrol Officers | Cross-sectional survey | 05/20 - 05/30 | Pakistan                 | 15.6%         | High     |
| Protective Service Occupations (33-0000) | Gudo et al., 2020 <sup>65</sup>      | n=564  | Police and Sheriff's Patrol Officers | Cross-sectional survey | 06/17 - 06/30 | Mozambique               | 6% (4-8%)     | High     |
| Protective Service Occupations (33-0000) | Gujski et al., 2020 <sup>180</sup>   | n=4026 | Police and Sheriff's Patrol Officers | Cross-sectional survey | 06/22 - 07/08 | Poland                   | 4.2%          | Moderate |
| Protective Service Occupations (33-0000) | Halatoko et al., 2020 <sup>41</sup>  | n=196  | Police and Sheriff's Patrol Officers | Cross-sectional survey | 04/23 - 05/08 | Togo                     | 0%            | High     |
| Protective Service Occupations (33-0000) | Langa et al., 2020 <sup>181</sup>    | n=471  | Police and Sheriff's Patrol Officers | Cross-sectional survey | 09/28 - 10/09 | Mozambique               | 1.5%          | High     |
| Protective Service Occupations (33-0000) | Macicame et al., 2020 <sup>182</sup> | n=456  | Police and Sheriff's Patrol Officers | Cross-sectional survey | 09/14 - 09/30 | Mozambique               | 4.39%         | High     |
| Protective Service Occupations (33-0000) | Mahomed et al., 2020 <sup>81</sup>   | n=554  | Police and Sheriff's Patrol Officers | Cross-sectional survey | 08/31 - 10/12 | Mozambique               | 2.9%          | High     |
| Protective Service Occupations (33-0000) | Reuben et al., 2020 <sup>168</sup>   | n=220  | Police and Sheriff's Patrol Officers | Cross-sectional survey | 05/28 - 07/15 | United States of America | 3.64%         | High     |
| Protective Service Occupations (33-0000) | Sabourin et al., 2020 <sup>35</sup>  | n=125  | Police and Sheriff's Patrol Officers | Cross-sectional survey | 07/15 - 08/15 | United States of America | 4%            | High     |

|                                                            |                                     |         |                                                  |                        |               |                          |       |          |
|------------------------------------------------------------|-------------------------------------|---------|--------------------------------------------------|------------------------|---------------|--------------------------|-------|----------|
| Protective Service Occupations (33-0000)                   | Shukla et al., 2020 <sup>177</sup>  | n=1643  | Police and Sheriff's Patrol Officers             | Cross-sectional survey | 04/24 - 05/21 | United States of America | 1.52% | Moderate |
| Protective Service Occupations (33-0000)                   | Siddiqui et al., 2020 <sup>2</sup>  | n=27    | Police and Sheriff's Patrol Officers             | Prospective cohort     | 04/15 - 08/15 | India                    | 7.4%  | High     |
| Protective Service Occupations (33-0000)                   | Viegas et al., 2020 <sup>110</sup>  | n=559   | Police and Sheriff's Patrol Officers             | Cross-sectional survey | 08/03 - 08/21 | Mozambique               | 3.94% | High     |
| Protective Service Occupations (33-0000)                   | Denyer et al., 2020 <sup>60</sup>   | n=38216 | Security Guards                                  | Cross-sectional survey | 05/12 - 05/18 | Japan                    | 0.23% | Unclear  |
| Protective Service Occupations (33-0000)                   | Mahumane et al., 2020 <sup>82</sup> | n=407   | Security Guards                                  | Cross-sectional survey | 11/02 - 11/17 | Mozambique               | 4.9%  | High     |
| Protective Service Occupations (33-0000)                   | Siddiqui et al., 2020 <sup>2</sup>  | n=9     | Security Guards                                  | Prospective cohort     | 04/15 - 08/15 | India                    | 0%    | High     |
| Protective Service Occupations (33-0000)                   | Silva et al., 2020 <sup>34</sup>    | n=32    | Security Guards                                  | Cross-sectional survey | 06/05 - 07/31 | Brazil                   | 34%   | High     |
| Protective Service Occupations (33-0000)                   | Thani et al., 2020 <sup>183</sup>   | n=61    | Security Guards                                  | Cross-sectional survey | 07/26 - 09/09 | Qatar                    | 60.1% | Moderate |
| Food Preparation and Serving Related Occupations (35-0000) | Thani et al., 2020 <sup>183</sup>   | n=93    | Food Preparation and Serving Related Occupations | Cross-sectional survey | 07/26 - 09/09 | Qatar                    | 29.2% | Moderate |
| Food Preparation and Serving Related Occupations (35-0000) | Siddiqui et al., 2020 <sup>2</sup>  | n=8     | Cooks, All Other                                 | Prospective cohort     | 04/15 - 08/15 | India                    | 37.5% | High     |
| Food Preparation and Serving                               | Brunner et al., 2020 <sup>54</sup>  | n=8     | Food Preparation Workers                         | Cross-sectional survey | 05/04 - 05/29 | United States of America | 0%    | High     |

|    |                                                                     |                                       |       |                                                           |                                                                                   |               |                          |       |          |
|----|---------------------------------------------------------------------|---------------------------------------|-------|-----------------------------------------------------------|-----------------------------------------------------------------------------------|---------------|--------------------------|-------|----------|
| 1  | Related Occupations (35-0000)                                       |                                       |       |                                                           |                                                                                   |               |                          |       |          |
| 2  |                                                                     |                                       |       |                                                           |                                                                                   |               |                          |       |          |
| 3  |                                                                     |                                       |       |                                                           |                                                                                   |               |                          |       |          |
| 4  | Healthcare Support Occupations (31-0000)                            | Rosser et al., 2020 <sup>33</sup>     | n=335 | Healthcare Support Occupations                            | Cross-sectional survey                                                            | 04/20 - 05/20 | United States of America | 3.58% | High     |
| 5  |                                                                     |                                       |       |                                                           |                                                                                   |               |                          |       |          |
| 6  |                                                                     |                                       |       |                                                           |                                                                                   |               |                          |       |          |
| 7  | Food Preparation and Serving Related Occupations (35-0000)          | Biggs et al., 2020 <sup>3</sup>       | n=24  | Food Servers, Nonrestaurant                               | Cross-sectional survey                                                            | 04/28 - 05/03 | United States of America | 4.17% | Moderate |
| 8  |                                                                     |                                       |       |                                                           |                                                                                   |               |                          |       |          |
| 9  |                                                                     |                                       |       |                                                           |                                                                                   |               |                          |       |          |
| 10 |                                                                     |                                       |       |                                                           |                                                                                   |               |                          |       |          |
| 11 | Food Preparation and Serving Related Occupations (35-0000)          | Leidner et al., 2020 <sup>22</sup>    | n=113 | Food Servers, Nonrestaurant                               | Cross sectional study with prospective cohort follow up of a subset of the sample | 04/08 - 05/22 | United States of America | 1.77% | High     |
| 12 |                                                                     |                                       |       |                                                           |                                                                                   |               |                          |       |          |
| 13 |                                                                     |                                       |       |                                                           |                                                                                   |               |                          |       |          |
| 14 |                                                                     |                                       |       |                                                           |                                                                                   |               |                          |       |          |
| 15 |                                                                     |                                       |       |                                                           |                                                                                   |               |                          |       |          |
| 16 | Food Preparation and Serving Related Occupations (35-0000)          | Hanrath et al., 2020 <sup>32</sup>    | n=340 | Other Food Preparation and Serving Related Workers        | Cross-sectional survey                                                            | 05/29 - 07/06 | The United Kingdom       | 8.53% | High     |
| 17 |                                                                     |                                       |       |                                                           |                                                                                   |               |                          |       |          |
| 18 |                                                                     |                                       |       |                                                           |                                                                                   |               |                          |       |          |
| 19 |                                                                     |                                       |       |                                                           |                                                                                   |               |                          |       |          |
| 20 |                                                                     |                                       |       |                                                           |                                                                                   |               |                          |       |          |
| 21 |                                                                     |                                       |       |                                                           |                                                                                   |               |                          |       |          |
| 22 | Building and Grounds Cleaning and Maintenance Occupations (37-0000) | Martin et al., 2020 <sup>23</sup>     | n=528 | Building and Grounds Cleaning and Maintenance Occupations | Cross-sectional survey                                                            | 05/29 - 07/13 | The United Kingdom       | 8.14% | Moderate |
| 23 |                                                                     |                                       |       |                                                           |                                                                                   |               |                          |       |          |
| 24 |                                                                     |                                       |       |                                                           |                                                                                   |               |                          |       |          |
| 25 |                                                                     |                                       |       |                                                           |                                                                                   |               |                          |       |          |
| 26 |                                                                     |                                       |       |                                                           |                                                                                   |               |                          |       |          |
| 27 | Building and Grounds Cleaning and Maintenance Occupations (37-0000) | Brousseau et al., 2020 <sup>134</sup> | n=102 | Building Cleaning and Pest Control Workers                | Cross-sectional survey                                                            | 07/06 - 09/24 | Canada                   | 10.8% | High     |
| 28 |                                                                     |                                       |       |                                                           |                                                                                   |               |                          |       |          |
| 29 |                                                                     |                                       |       |                                                           |                                                                                   |               |                          |       |          |
| 30 |                                                                     |                                       |       |                                                           |                                                                                   |               |                          |       |          |
| 31 |                                                                     |                                       |       |                                                           |                                                                                   |               |                          |       |          |
| 32 | Building and Grounds Cleaning and Maintenance Occupations (37-0000) | Chau et al., 2020 <sup>126</sup>      | n=42  | Building Cleaning and Pest Control Workers                | Cross-sectional survey                                                            | 08/23 - 08/30 | Viet Nam                 | 0%    | High     |
| 33 |                                                                     |                                       |       |                                                           |                                                                                   |               |                          |       |          |
| 34 |                                                                     |                                       |       |                                                           |                                                                                   |               |                          |       |          |
| 35 |                                                                     |                                       |       |                                                           |                                                                                   |               |                          |       |          |
| 36 |                                                                     |                                       |       |                                                           |                                                                                   |               |                          |       |          |
| 37 |                                                                     |                                       |       |                                                           |                                                                                   |               |                          |       |          |
| 38 |                                                                     |                                       |       |                                                           |                                                                                   |               |                          |       |          |
| 39 |                                                                     |                                       |       |                                                           |                                                                                   |               |                          |       |          |
| 40 |                                                                     |                                       |       |                                                           |                                                                                   |               |                          |       |          |
| 41 |                                                                     |                                       |       |                                                           |                                                                                   |               |                          |       |          |
| 42 |                                                                     |                                       |       |                                                           |                                                                                   |               |                          |       |          |
| 43 |                                                                     |                                       |       |                                                           |                                                                                   |               |                          |       |          |
| 44 |                                                                     |                                       |       |                                                           |                                                                                   |               |                          |       |          |
| 45 |                                                                     |                                       |       |                                                           |                                                                                   |               |                          |       |          |
| 46 |                                                                     |                                       |       |                                                           |                                                                                   |               |                          |       |          |
| 47 |                                                                     |                                       |       |                                                           |                                                                                   |               |                          |       |          |

|                                                                     |                                          |       |                                                               |                        |               |                          |        |          |
|---------------------------------------------------------------------|------------------------------------------|-------|---------------------------------------------------------------|------------------------|---------------|--------------------------|--------|----------|
| Occupations (37-0000)                                               |                                          |       |                                                               |                        |               |                          |        |          |
| Building and Grounds Cleaning and Maintenance Occupations (37-0000) | Finkenzeller et al., 2020 <sup>158</sup> | n=57  | Building Cleaning and Pest Control Workers                    | Prospective cohort     | 06/29 - 07/29 | Germany                  | 19.3%  | Moderate |
| Building and Grounds Cleaning and Maintenance Occupations (37-0000) | Chau et al., 2020 <sup>126</sup>         | n=6   | Janitors and Cleaners, Except Maids and Housekeeping Cleaners | Cross-sectional survey | 08/23 - 08/30 | Viet Nam                 | 0%     | High     |
| Building and Grounds Cleaning and Maintenance Occupations (37-0000) | Epstude et al., 2020 <sup>184</sup>      | n=45  | Janitors and Cleaners, Except Maids and Housekeeping Cleaners | Cross-sectional survey | 06/15 - 06/30 | Germany                  | 0%     | High     |
| Building and Grounds Cleaning and Maintenance Occupations (37-0000) | Thani et al., 2020 <sup>183</sup>        | n=105 | Janitors and Cleaners, Except Maids and Housekeeping Cleaners | Cross-sectional survey | 07/26 - 09/09 | Qatar                    | 54.5%  | Moderate |
| Building and Grounds Cleaning and Maintenance Occupations (37-0000) | Brunner et al., 2020 <sup>54</sup>       | n=23  | Maids and Housekeeping Cleaners                               | Cross-sectional survey | 05/04 - 05/29 | United States of America | 0%     | High     |
| Building and Grounds Cleaning and Maintenance Occupations (37-0000) | Goenka et al., 2020 <sup>25</sup>        | n=226 | Maids and Housekeeping Cleaners                               | Cross-sectional survey | 07/12 - 08/23 | India                    | 26.11% | Moderate |
| Building and Grounds Cleaning and Maintenance Occupations (37-0000) | Goenka et al., 2020 <sup>26</sup>        | n=10  | Maids and Housekeeping Cleaners                               | Cross-sectional survey | 08/01 - 08/31 | India                    | 10%    | High     |

|                                                                     |                                    |        |                                 |                                                                                   |               |                            |                  |          |
|---------------------------------------------------------------------|------------------------------------|--------|---------------------------------|-----------------------------------------------------------------------------------|---------------|----------------------------|------------------|----------|
| Building and Grounds Cleaning and Maintenance Occupations (37-0000) | Hanrath et al., 2020 <sup>32</sup> | n=515  | Maids and Housekeeping Cleaners | Cross-sectional survey                                                            | 05/29 - 07/06 | The United Kingdom         | 13.2%            | High     |
| Building and Grounds Cleaning and Maintenance Occupations (37-0000) | Khan et al., 2020 <sup>127</sup>   | n=276  | Maids and Housekeeping Cleaners | Cross-sectional survey                                                            | 06/15 - 06/29 | India                      | 3.3% (1.7-6.2%)  | Moderate |
| Building and Grounds Cleaning and Maintenance Occupations (37-0000) | Leidner et al., 2020 <sup>22</sup> | n=137  | Maids and Housekeeping Cleaners | Cross sectional study with prospective cohort follow up of a subset of the sample | 04/08 - 05/22 | United States of America   | 8.03%            | High     |
| Building and Grounds Cleaning and Maintenance Occupations (37-0000) | Moscola et al., 2020 <sup>89</sup> | n=7314 | Maids and Housekeeping Cleaners | Cross-sectional survey                                                            | 04/20 - 06/23 | United States of America   | 20.9%            | High     |
| Building and Grounds Cleaning and Maintenance Occupations (37-0000) | Shakiba et al., 2020 <sup>10</sup> | n=159  | Maids and Housekeeping Cleaners | Cross-sectional survey                                                            | 04/11 - 04/19 | Iran (Islamic Republic of) | 25% (13.6-37.5%) | Moderate |
| Building and Grounds Cleaning and Maintenance Occupations (37-0000) | Shields et al., 2020 <sup>97</sup> | n=29   | Maids and Housekeeping Cleaners | Cross-sectional survey                                                            | 04/24 - 04/25 | The United Kingdom         | 34.5%            | High     |
| Building and Grounds Cleaning and Maintenance Occupations (37-0000) | Siddiqui et al., 2020 <sup>2</sup> | n=46   | Maids and Housekeeping Cleaners | Prospective cohort                                                                | 04/15 - 08/15 | India                      | 21.7%            | High     |

|                                                 |                                     |       |                                                |                        |               |                          |                    |          |
|-------------------------------------------------|-------------------------------------|-------|------------------------------------------------|------------------------|---------------|--------------------------|--------------------|----------|
| Personal Care and Service Occupations (39-0000) | Biggs et al., 2020 <sup>3</sup>     | n=10  | Hairdressers, Hairstylists, and Cosmetologists | Cross-sectional survey | 04/28 - 05/03 | United States of America | 10%                | Moderate |
| Personal Care and Service Occupations (39-0000) | Biggs et al., 2020 <sup>3</sup>     | n=48  | Childcare Workers                              | Cross-sectional survey | 04/28 - 05/03 | United States of America | 0%                 | Moderate |
| Personal Care and Service Occupations (39-0000) | Chen et al., 2020 <sup>135</sup>    | n=11  | Personal Care Aides                            | Cross-sectional survey | 02/19 - 02/19 | China                    | 9.09%              | High     |
| Personal Care and Service Occupations (39-0000) | Galan et al., 2020 <sup>20</sup>    | n=337 | Personal Care Aides                            | Cross-sectional survey | 04/14 - 04/27 | Spain                    | 27.89%             | High     |
| Personal Care and Service Occupations (39-0000) | Galan et al., 2020 <sup>20</sup>    | n=168 | Personal Care Aides                            | Cross-sectional survey | 04/14 - 04/27 | Spain                    | 27.38%             | High     |
| Personal Care and Service Occupations (39-0000) | Godbout et al., 2020 <sup>138</sup> | n=86  | Personal Care Aides                            | Cross-sectional survey | 07/27 - 10/02 | United States of America | 2.32%              | High     |
| Personal Care and Service Occupations (39-0000) | Hassan et al., 2020 <sup>185</sup>  | n=403 | Personal Care Aides                            | Cross-sectional survey | 05/11 - 06/17 | Sweden                   | 20.1%              | High     |
| Personal Care and Service Occupations (39-0000) | Kumar et al., 2020 <sup>142</sup>   | n=292 | Personal Care Aides                            | Cross-sectional survey | 06/01 - 06/30 | India                    | 18.5% (14.5-23.3%) | High     |
| Personal Care and Service Occupations (39-0000) | Ladhani et al., 2020 <sup>186</sup> | n=208 | Personal Care Aides                            | Prospective cohort     | 04/10 - 04/13 | The United Kingdom       | 75% (68.7-80.4%)   | High     |



|                                                 |                                       |        |                               |                        |               |                          |                    |          |
|-------------------------------------------------|---------------------------------------|--------|-------------------------------|------------------------|---------------|--------------------------|--------------------|----------|
| Personal Care and Service Occupations (39-0000) | Lindahl et al., 2020 <sup>187</sup>   | n=1005 | Personal Care Aides           | Cross-sectional survey | 04/01 - 04/20 | Sweden                   | 22.9% (20.4-25.7%) | High     |
| Personal Care and Service Occupations (39-0000) | Regan et al., 2020 <sup>188</sup>     | n=305  | Personal Care Aides           | Cross-sectional survey | 04/15 - 05/06 | United States of America | 23.6%              | Unclear  |
| Personal Care and Service Occupations (39-0000) | Siddiqui et al., 2020 <sup>2</sup>    | n=5    | Personal Care Aides           | Prospective cohort     | 04/15 - 08/15 | India                    | 40%                | High     |
| Personal Care and Service Occupations (39-0000) | Venugopal et al., 2020 <sup>150</sup> | n=72   | Personal Care Aides           | Cross-sectional survey | 03/01 - 05/01 | United States of America | 28%                | Moderate |
| Personal Care and Service Occupations (39-0000) | Viegas et al., 2020 <sup>110</sup>    | n=85   | Personal Care Aides           | Cross-sectional survey | 08/03 - 08/21 | Mozambique               | 1.18%              | High     |
| Sales and Related Occupations (41-0000)         | Arnaldo et al., 2020 <sup>13</sup>    | n=928  | Sales and Related Occupations | Cross-sectional survey | 07/06 - 07/13 | Mozambique               | 6.5%               | High     |
| Sales and Related Occupations (41-0000)         | Arnaldo et al., 2020 <sup>48</sup>    | n=1123 | Sales and Related Occupations | Cross-sectional survey | 08/10 - 08/21 | Mozambique               | 1.6%               | High     |
| Sales and Related Occupations (41-0000)         | Langa et al., 2020 <sup>181</sup>     | n=871  | Sales and Related Occupations | Cross-sectional survey | 09/28 - 10/09 | Mozambique               | 0.2%               | High     |
| Sales and Related Occupations (41-0000)         | Mabunda et al., 2020 <sup>15</sup>    | n=1585 | Sales and Related Occupations | Cross-sectional survey | 09/21 - 10/02 | Mozambique               | 8.3%               | High     |
| Sales and Related Occupations (41-0000)         | Macicame et al., 2020 <sup>182</sup>  | n=1288 | Sales and Related Occupations | Cross-sectional survey | 09/14 - 09/30 | Mozambique               | 4.97%              | High     |

|                                         |                                     |         |                               |                        |               |                            |                    |          |
|-----------------------------------------|-------------------------------------|---------|-------------------------------|------------------------|---------------|----------------------------|--------------------|----------|
| Sales and Related Occupations (41-0000) | Mahomed et al., 2020 <sup>81</sup>  | n=1556  | Sales and Related Occupations | Cross-sectional survey | 08/31 - 10/12 | Mozambique                 | 0.8%               | High     |
| Sales and Related Occupations (41-0000) | Mahumane et al., 2020 <sup>82</sup> | n=643   | Sales and Related Occupations | Cross-sectional survey | 11/02 - 11/17 | Mozambique                 | 1.9%               | High     |
| Sales and Related Occupations (41-0000) | Arnaldo et al., 2020 <sup>14</sup>  | n=472   | Sales and Related Occupations | Cross-sectional survey | 11/16 - 11/21 | Mozambique                 | 6.8%               | High     |
| Sales and Related Occupations (41-0000) | Arnaldo et al., 2020 <sup>14</sup>  | n=460   | Sales and Related Occupations | Cross-sectional survey | 11/02 - 11/12 | Mozambique                 | 5.9%               | High     |
| Sales and Related Occupations (41-0000) | Mahomed et al., 2020 <sup>16</sup>  | n=517   | Sales and Related Occupations | Cross-sectional survey | 11/26 - 12/03 | Mozambique                 | 8.9%               | High     |
| Sales and Related Occupations (41-0000) | Mahomed et al., 2020 <sup>16</sup>  | n=1001  | Sales and Related Occupations | Cross-sectional survey | 11/07 - 11/21 | Mozambique                 | 4.5%               | High     |
| Sales and Related Occupations (41-0000) | Biggs et al., 2020 <sup>3</sup>     | n=19    | Retail Sales Workers          | Cross-sectional survey | 04/28 - 05/03 | United States of America   | 0%                 | Moderate |
| Sales and Related Occupations (41-0000) | Poustchi et al., 2020 <sup>28</sup> | n=753   | Cashiers                      | Cross-sectional survey | 04/17 - 06/02 | Iran (Islamic Republic of) | 16.1% (12.9-19.2%) | Moderate |
| Sales and Related Occupations (41-0000) | Alali et al., 2020 <sup>189</sup>   | n=525   | Cashiers                      | Cross-sectional survey | 05/23 - 06/26 | Kuwait                     | 38.1% (34-42.3%)   | High     |
| Sales and Related Occupations (41-0000) | Denyer et al., 2020 <sup>60</sup>   | n=19075 | Retail Salespersons           | Cross-sectional survey | 05/12 - 05/18 | Japan                      | 0.04%              | Unclear  |
| Sales and Related Occupations (41-0000) | Kern et al., 2020 <sup>73</sup>     | n=300   | Retail Salespersons           | Cross-sectional survey | 04/09 - 04/16 | Germany                    | 0.33% (0.01-1.84%) | High     |



|                                                         |                                        |        |                                               |                        |               |                          |                   |          |
|---------------------------------------------------------|----------------------------------------|--------|-----------------------------------------------|------------------------|---------------|--------------------------|-------------------|----------|
| Office and Administrative Support Occupations (43-0000) | Rosser et al., 2020 <sup>33</sup>      | n=972  | Office and Administrative Support Occupations | Cross-sectional survey | 04/20 - 05/20 | United States of America | 1.34%             | High     |
| Office and Administrative Support Occupations (43-0000) | Tsitsilonis et al., 2020 <sup>12</sup> | n=504  | Office and Administrative Support Occupations | Cross-sectional survey | 06/15 - 07/15 | Greece                   | 0.48% (0-2.37%)   | Moderate |
| Office and Administrative Support Occupations (43-0000) | Khan et al., 2020 <sup>45</sup>        | n=37   | Hotel, Motel, and Resort Desk Clerks          | Cross-sectional survey | 07/01 - 07/15 | India                    | 10.8% (4.1-25.5%) | Moderate |
| Office and Administrative Support Occupations (43-0000) | Brunner et al., 2020 <sup>54</sup>     | n=26   | Receptionists and Information Clerks          | Cross-sectional survey | 05/04 - 05/29 | United States of America | 0%                | High     |
| Office and Administrative Support Occupations (43-0000) | Favara et al., 2020 <sup>136</sup>     | n=10   | Receptionists and Information Clerks          | Prospective cohort     | 06/01 - 06/07 | The United Kingdom       | 0%                | High     |
| Office and Administrative Support Occupations (43-0000) | Moscola et al., 2020 <sup>89</sup>     | n=9645 | Receptionists and Information Clerks          | Cross-sectional survey | 04/20 - 06/23 | United States of America | 12.6%             | High     |
| Office and Administrative Support Occupations (43-0000) | Biggs et al., 2020 <sup>3</sup>        | n=11   | Shipping, Receiving, and Traffic Clerks       | Cross-sectional survey | 04/28 - 05/03 | United States of America | 18.18%            | Moderate |
| Office and Administrative                               | Silva et al., 2020 <sup>34</sup>       | n=82   | Stock Clerks and Order Fillers                | Cross-sectional survey | 06/05 - 07/31 | Brazil                   | 4.88%             | High     |

|                                                         |                                     |        |                                                               |                        |               |                          |                 |          |
|---------------------------------------------------------|-------------------------------------|--------|---------------------------------------------------------------|------------------------|---------------|--------------------------|-----------------|----------|
| Support Occupations (43-0000)                           |                                     |        |                                                               |                        |               |                          |                 |          |
| Office and Administrative Support Occupations (43-0000) | Khan et al., 2020 <sup>45</sup>     | n=186  | Secretaries and Administrative Assistants                     | Cross-sectional survey | 07/01 - 07/15 | India                    | 3.8% (1.8-7.7%) | Moderate |
| Office and Administrative Support Occupations (43-0000) | Alemu et al., 2020 <sup>6</sup>     | n=48   | Executive Secretaries and Executive Administrative Assistants | Cross-sectional survey | 04/23 - 04/28 | Ethiopia                 | 2.1%            | Moderate |
| Office and Administrative Support Occupations (43-0000) | Barallat et al., 2020 <sup>50</sup> | n=1181 | Executive Secretaries and Executive Administrative Assistants | Cross-sectional survey | 05/04 - 05/22 | Spain                    | 6.52%           | High     |
| Office and Administrative Support Occupations (43-0000) | Lumley et al., 2020 <sup>9</sup>    | n=1557 | Executive Secretaries and Executive Administrative Assistants | Prospective cohort     | 04/23 - 11/30 | The United Kingdom       | 6.74%           | Moderate |
| Office and Administrative Support Occupations (43-0000) | Reuben et al., 2020 <sup>168</sup>  | n=18   | Executive Secretaries and Executive Administrative Assistants | Cross-sectional survey | 05/28 - 07/15 | United States of America | 0%              | High     |
| Office and Administrative Support Occupations (43-0000) | Akinbami et al., 2020 <sup>46</sup> | n=964  | Medical Secretaries                                           | Cross-sectional survey | 05/18 - 06/13 | United States of America | 8% (6.4-9.9%)   | Moderate |
| Office and Administrative Support                       | Alharbi et al., 2020 <sup>125</sup> | n=8    | Medical Secretaries                                           | Cross-sectional survey | 04/18 - 06/17 | Saudi Arabia             | 25%             | High     |

|                                                         |                                          |        |                     |                                                              |               |                          |       |          |
|---------------------------------------------------------|------------------------------------------|--------|---------------------|--------------------------------------------------------------|---------------|--------------------------|-------|----------|
| Occupations (43-0000)                                   |                                          |        |                     |                                                              |               |                          |       |          |
| Office and Administrative Support Occupations (43-0000) | Dimcheff et al., 2020 <sup>157</sup>     | n=357  | Medical Secretaries | Cross-sectional survey                                       | 06/08 - 07/08 | United States of America | 4.2%  | Moderate |
| Office and Administrative Support Occupations (43-0000) | Erber et al., 2020 <sup>31</sup>         | n=557  | Medical Secretaries | Cross-sectional survey                                       | 04/14 - 05/29 | Germany                  | 3.78% | High     |
| Office and Administrative Support Occupations (43-0000) | Finkenzeller et al., 2020 <sup>158</sup> | n=240  | Medical Secretaries | Prospective cohort                                           | 06/29 - 07/29 | Germany                  | 7.1%  | Moderate |
| Office and Administrative Support Occupations (43-0000) | Goenka et al., 2020 <sup>25</sup>        | n=75   | Medical Secretaries | Cross-sectional survey                                       | 07/12 - 08/23 | India                    | 8%    | Moderate |
| Office and Administrative Support Occupations (43-0000) | Goenka et al., 2020 <sup>25</sup>        | n=75   | Medical Secretaries | Cross-sectional survey                                       | 07/12 - 08/23 | India                    | 8%    | Moderate |
| Office and Administrative Support Occupations (43-0000) | Iversen et al., 2020 <sup>8</sup>        | n=2631 | Medical Secretaries | Cross-sectional survey                                       | 04/15 - 04/22 | Denmark                  | 2.7%  | Low      |
| Office and Administrative Support Occupations (43-0000) | Leidner et al., 2020 <sup>22</sup>       | n=793  | Medical Secretaries | Cross sectional study with prospective cohort follow up of a | 04/08 - 05/22 | United States of America | 3.15% | High     |

|                                                         |                                    |        |                        |                        |               |                    |                |          |
|---------------------------------------------------------|------------------------------------|--------|------------------------|------------------------|---------------|--------------------|----------------|----------|
|                                                         |                                    |        |                        | subset of the sample   |               |                    |                |          |
| Office and Administrative Support Occupations (43-0000) | Mesnil et al., 2020 <sup>143</sup> | n=184  | Medical Secretaries    | Cross-sectional survey | 06/08 - 06/22 | France             | 14.13%         | High     |
| Office and Administrative Support Occupations (43-0000) | Nishida et al., 2020 <sup>90</sup> | n=98   | Medical Secretaries    | Cross-sectional survey | 06/12 - 06/19 | Japan              | 1% (0.18-5.6%) | Moderate |
| Office and Administrative Support Occupations (43-0000) | Noor et al., 2020 <sup>130</sup>   | n=91   | Medical Secretaries    | Cross-sectional survey | 07/13 - 07/15 | Pakistan           | 43.96%         | Moderate |
| Office and Administrative Support Occupations (43-0000) | Thani et al., 2020 <sup>183</sup>  | n=82   | Medical Secretaries    | Cross-sectional survey | 07/26 - 09/09 | Qatar              | 31.6%          | Moderate |
| Office and Administrative Support Occupations (43-0000) | Zhou et al., 2020 <sup>166</sup>   | n=505  | Medical Secretaries    | Cross-sectional survey | 03/16 - 03/25 | China              | 1.39%          | Moderate |
| Office and Administrative Support Occupations (43-0000) | Chau et al., 2020 <sup>126</sup>   | n=20   | Data Entry Keyers      | Cross-sectional survey | 08/23 - 08/30 | Viet Nam           | 0%             | High     |
| Office and Administrative Support Occupations (43-0000) | Jones et al., 2020 <sup>29</sup>   | n=1233 | Office Clerks, General | Cross-sectional survey | 01/15 - 06/15 | The United Kingdom | 6.1%           | High     |

|                                                         |                                      |       |                                                      |                        |               |                          |        |          |
|---------------------------------------------------------|--------------------------------------|-------|------------------------------------------------------|------------------------|---------------|--------------------------|--------|----------|
| Office and Administrative Support Occupations (43-0000) | Rosser et al., 2020 <sup>33</sup>    | n=218 | Office Clerks, General                               | Cross-sectional survey | 04/20 - 05/20 | United States of America | 0%     | High     |
| Office and Administrative Support Occupations (43-0000) | Satpati et al., 2020 <sup>27</sup>   | n=47  | Office Clerks, General                               | Cross-sectional survey | 07/26 - 08/08 | India                    | 4.26%  | Moderate |
| Office and Administrative Support Occupations (43-0000) | Baracco et al., 2020 <sup>24</sup>   | n=194 | Office and Administrative Support Workers, All Other | Cross-sectional survey | 04/23 - 05/05 | Italy                    | 14.4%  | High     |
| Office and Administrative Support Occupations (43-0000) | Brzostek et al., 2020 <sup>151</sup> | n=286 | Office and Administrative Support Workers, All Other | Cross-sectional survey | 04/17 - 05/07 | United States of America | 45.5%  | Moderate |
| Office and Administrative Support Occupations (43-0000) | Kassem et al., 2020 <sup>72</sup>    | n=7   | Office and Administrative Support Workers, All Other | Cross-sectional survey | 06/01 - 06/14 | Egypt                    | 14.28% | High     |
| Office and Administrative Support Occupations (43-0000) | Kassem et al., 2020 <sup>72</sup>    | n=7   | Office and Administrative Support Workers, All Other | Cross-sectional survey | 06/01 - 06/14 | Egypt                    | 0%     | High     |
| Office and Administrative Support Occupations (43-0000) | Kassem et al., 2020 <sup>72</sup>    | n=7   | Office and Administrative Support Workers, All Other | Cross-sectional survey | 06/01 - 06/14 | Egypt                    | 0%     | High     |



|                                                             |                                     |        |                                                               |                        |               |                          |        |          |
|-------------------------------------------------------------|-------------------------------------|--------|---------------------------------------------------------------|------------------------|---------------|--------------------------|--------|----------|
| Office and Administrative Support Occupations (43-0000)     | Kassem et al., 2020 <sup>72</sup>   | n=7    | Office and Administrative Support Workers, All Other          | Cross-sectional survey | 06/01 - 06/14 | Egypt                    | 14.28% | High     |
| Farming, Fishing, and Forestry Occupations (45-0000)        | Satpati et al., 2020 <sup>27</sup>  | n=53   | Agricultural Workers                                          | Cross-sectional survey | 07/26 - 08/08 | India                    | 0%     | Moderate |
| Farming, Fishing, and Forestry Occupations (45-0000)        | Addetia et al., 2020 <sup>190</sup> | n=120  | Fishers and Related Fishing Workers                           | Retrospective cohort   | 05/01 - 05/31 | United States of America | 5%     | High     |
| Farming, Fishing, and Forestry Occupations (45-0000)        | Arnaldo et al., 2020 <sup>13</sup>  | n=80   | Fishers and Related Fishing Workers                           | Cross-sectional survey | 07/06 - 07/13 | Mozambique               | 5%     | High     |
| Construction and Extraction Occupations (47-0000)           | Biggs et al., 2020 <sup>3</sup>     | n=42   | Construction Trades Workers                                   | Cross-sectional survey | 04/28 - 05/03 | United States of America | 0%     | Moderate |
| Installation, Maintenance, and Repair Occupations (49-0000) | Blairon et al., 2020 <sup>52</sup>  | n=134  | Other Installation, Maintenance, and Repair Occupations       | Cross-sectional survey | 05/25 - 06/19 | Belgium                  | 16.4%  | High     |
| Production Occupations (51-0000)                            | Picon et al., 2020 <sup>191</sup>   | n=40   | Butchers and Other Meat, Poultry, and Fish Processing Workers | Cross-sectional survey | 06/13 - 06/17 | Brazil                   | 15%    | Moderate |
| Production Occupations (51-0000)                            | Picon et al., 2020 <sup>191</sup>   | n=1087 | Miscellaneous Food Processing Workers                         | Cross-sectional survey | 06/13 - 06/17 | Brazil                   | 1.47%  | Moderate |
| Production Occupations (51-0000)                            | Bontadi et al., 2020 <sup>192</sup> | n=1267 | Production Workers, All Other                                 | Cross-sectional survey | 04/11 - 04/29 | Italy                    | 1.58%  | High     |

|                                                                                                                                                                                                                                                                               |                                                          |                                      |       |                                                |                        |               |                          |                 |          |
|-------------------------------------------------------------------------------------------------------------------------------------------------------------------------------------------------------------------------------------------------------------------------------|----------------------------------------------------------|--------------------------------------|-------|------------------------------------------------|------------------------|---------------|--------------------------|-----------------|----------|
| 1<br>2<br>3<br>4<br>5<br>6<br>7<br>8<br>9<br>10<br>11<br>12<br>13<br>14<br>15<br>16<br>17<br>18<br>19<br>20<br>21<br>22<br>23<br>24<br>25<br>26<br>27<br>28<br>29<br>30<br>31<br>32<br>33<br>34<br>35<br>36<br>37<br>38<br>39<br>40<br>41<br>42<br>43<br>44<br>45<br>46<br>47 | Production Occupations (51-0000)                         | Xu et al., 2020 <sup>193</sup>       | n=442 | Production Workers, All Other                  | Cross-sectional survey | 03/09 - 04/10 | China                    | 1.4% (0.6-2.9%) | High     |
|                                                                                                                                                                                                                                                                               | Transportation and Material Moving Occupations (53-0000) | Arnaldo et al., 2020 <sup>13</sup>   | n=248 | Transportation and Material Moving Occupations | Cross-sectional survey | 07/06 - 07/13 | Mozambique               | 4.8%            | High     |
|                                                                                                                                                                                                                                                                               | Transportation and Material Moving Occupations (53-0000) | Arnaldo et al., 2020 <sup>48</sup>   | n=367 | Transportation and Material Moving Occupations | Cross-sectional survey | 08/10 - 08/21 | Mozambique               | 7.4%            | High     |
|                                                                                                                                                                                                                                                                               | Transportation and Material Moving Occupations (53-0000) | Arnaldo et al., 2020 <sup>14</sup>   | n=112 | Transportation and Material Moving Occupations | Cross-sectional survey | 11/16 - 11/21 | Mozambique               | 16.1%           | High     |
|                                                                                                                                                                                                                                                                               | Transportation and Material Moving Occupations (53-0000) | Biggs et al., 2020 <sup>3</sup>      | n=14  | Transportation and Material Moving Occupations | Cross-sectional survey | 04/28 - 05/03 | United States of America | 0%              | Moderate |
|                                                                                                                                                                                                                                                                               | Transportation and Material Moving Occupations (53-0000) | Gudo et al., 2020 <sup>65</sup>      | n=554 | Transportation and Material Moving Occupations | Cross-sectional survey | 06/17 - 06/30 | Mozambique               | 3% (1-4%)       | High     |
|                                                                                                                                                                                                                                                                               | Transportation and Material Moving Occupations (53-0000) | Langa et al., 2020 <sup>181</sup>    | n=230 | Transportation and Material Moving Occupations | Cross-sectional survey | 09/28 - 10/09 | Mozambique               | 0.4%            | High     |
|                                                                                                                                                                                                                                                                               | Transportation and Material Moving Occupations (53-0000) | Mabunda et al., 2020 <sup>15</sup>   | n=473 | Transportation and Material Moving Occupations | Cross-sectional survey | 09/21 - 10/02 | Mozambique               | 8.7%            | High     |
|                                                                                                                                                                                                                                                                               | Transportation and Material Moving Occupations (53-0000) | Macicame et al., 2020 <sup>182</sup> | n=282 | Transportation and Material Moving Occupations | Cross-sectional survey | 09/14 - 09/30 | Mozambique               | 3.19%           | High     |

|    |                                                          |                                      |       |                                                                        |                        |               |                          |                  |          |
|----|----------------------------------------------------------|--------------------------------------|-------|------------------------------------------------------------------------|------------------------|---------------|--------------------------|------------------|----------|
| 1  | Transportation and Material Moving Occupations (53-0000) | Mahomed et al., 2020 <sup>81</sup>   | n=334 | Transportation and Material Moving Occupations                         | Cross-sectional survey | 08/31 - 10/12 | Mozambique               | 1.5%             | High     |
| 2  |                                                          |                                      |       |                                                                        |                        |               |                          |                  |          |
| 3  | Transportation and Material Moving Occupations (53-0000) | Mahumane et al., 2020 <sup>82</sup>  | n=287 | Transportation and Material Moving Occupations                         | Cross-sectional survey | 11/02 - 11/17 | Mozambique               | 1%               | High     |
| 4  |                                                          |                                      |       |                                                                        |                        |               |                          |                  |          |
| 5  | Transportation and Material Moving Occupations (53-0000) | Thani et al., 2020 <sup>183</sup>    | n=435 | Transportation and Material Moving Occupations                         | Cross-sectional survey | 07/26 - 09/09 | Qatar                    | 53.4%            | Moderate |
| 6  |                                                          |                                      |       |                                                                        |                        |               |                          |                  |          |
| 7  | Transportation and Material Moving Occupations (53-0000) | Halatoko et al., 2020 <sup>41</sup>  | n=212 | Air Transportation Workers                                             | Cross-sectional survey | 04/23 - 05/08 | Togo                     | 0.9%             | High     |
| 8  |                                                          |                                      |       |                                                                        |                        |               |                          |                  |          |
| 9  | Transportation and Material Moving Occupations (53-0000) | Viegas et al., 2020 <sup>110</sup>   | n=623 | Air Transportation Workers                                             | Cross-sectional survey | 08/03 - 08/21 | Mozambique               | 2.25%            | High     |
| 10 |                                                          |                                      |       |                                                                        |                        |               |                          |                  |          |
| 11 | Transportation and Material Moving Occupations (53-0000) | Viegas et al., 2020 <sup>110</sup>   | n=362 | Air Transportation Workers                                             | Cross-sectional survey | 08/03 - 08/21 | Mozambique               | 3.31%            | High     |
| 12 |                                                          |                                      |       |                                                                        |                        |               |                          |                  |          |
| 13 | Transportation and Material Moving Occupations (53-0000) | Khan et al., 2020 <sup>127</sup>     | n=57  | Ambulance Drivers and Attendants, Except Emergency Medical Technicians | Cross-sectional survey | 06/15 - 06/29 | India                    | 3.5% (0.9-13.3%) | Moderate |
| 14 |                                                          |                                      |       |                                                                        |                        |               |                          |                  |          |
| 15 | Transportation and Material Moving Occupations (53-0000) | Martinez et al., 2020 <sup>121</sup> | n=30  | Heavy and Tractor-Trailer Truck Drivers                                | Cross-sectional survey | 04/16 - 04/17 | United States of America | 16.67%           | High     |
| 16 |                                                          |                                      |       |                                                                        |                        |               |                          |                  |          |
| 17 | Transportation and Material Moving Occupations (53-0000) | Siddiqui et al., 2020 <sup>2</sup>   | n=9   | Heavy and Tractor-Trailer Truck Drivers                                | Prospective cohort     | 04/15 - 08/15 | India                    | 11.1%            | High     |
| 18 |                                                          |                                      |       |                                                                        |                        |               |                          |                  |          |
| 19 |                                                          |                                      |       |                                                                        |                        |               |                          |                  |          |
| 20 |                                                          |                                      |       |                                                                        |                        |               |                          |                  |          |
| 21 |                                                          |                                      |       |                                                                        |                        |               |                          |                  |          |
| 22 |                                                          |                                      |       |                                                                        |                        |               |                          |                  |          |
| 23 |                                                          |                                      |       |                                                                        |                        |               |                          |                  |          |
| 24 |                                                          |                                      |       |                                                                        |                        |               |                          |                  |          |
| 25 |                                                          |                                      |       |                                                                        |                        |               |                          |                  |          |
| 26 |                                                          |                                      |       |                                                                        |                        |               |                          |                  |          |
| 27 |                                                          |                                      |       |                                                                        |                        |               |                          |                  |          |
| 28 |                                                          |                                      |       |                                                                        |                        |               |                          |                  |          |
| 29 |                                                          |                                      |       |                                                                        |                        |               |                          |                  |          |
| 30 |                                                          |                                      |       |                                                                        |                        |               |                          |                  |          |
| 31 |                                                          |                                      |       |                                                                        |                        |               |                          |                  |          |
| 32 |                                                          |                                      |       |                                                                        |                        |               |                          |                  |          |
| 33 |                                                          |                                      |       |                                                                        |                        |               |                          |                  |          |
| 34 |                                                          |                                      |       |                                                                        |                        |               |                          |                  |          |
| 35 |                                                          |                                      |       |                                                                        |                        |               |                          |                  |          |
| 36 |                                                          |                                      |       |                                                                        |                        |               |                          |                  |          |
| 37 |                                                          |                                      |       |                                                                        |                        |               |                          |                  |          |
| 38 |                                                          |                                      |       |                                                                        |                        |               |                          |                  |          |
| 39 |                                                          |                                      |       |                                                                        |                        |               |                          |                  |          |
| 40 |                                                          |                                      |       |                                                                        |                        |               |                          |                  |          |
| 41 |                                                          |                                      |       |                                                                        |                        |               |                          |                  |          |
| 42 |                                                          |                                      |       |                                                                        |                        |               |                          |                  |          |
| 43 |                                                          |                                      |       |                                                                        |                        |               |                          |                  |          |
| 44 |                                                          |                                      |       |                                                                        |                        |               |                          |                  |          |
| 45 |                                                          |                                      |       |                                                                        |                        |               |                          |                  |          |
| 46 |                                                          |                                      |       |                                                                        |                        |               |                          |                  |          |
| 47 |                                                          |                                      |       |                                                                        |                        |               |                          |                  |          |

|                                                          |                                                          |                                     |        |                                                        |                        |               |                            |                    |          |
|----------------------------------------------------------|----------------------------------------------------------|-------------------------------------|--------|--------------------------------------------------------|------------------------|---------------|----------------------------|--------------------|----------|
| 1<br>2<br>3<br>4<br>5<br>6<br>7                          | Transportation and Material Moving Occupations (53-0000) | Halatoko et al., 2020 <sup>41</sup> | n=122  | Taxi Drivers and Chauffeurs                            | Cross-sectional survey | 04/23 - 05/08 | Togo                       | 0.8%               | High     |
| 8<br>9<br>10<br>11                                       | Transportation and Material Moving Occupations (53-0000) | Poustchi et al., 2020 <sup>28</sup> | n=718  | Taxi Drivers and Chauffeurs                            | Cross-sectional survey | 04/17 - 06/02 | Iran (Islamic Republic of) | 14.1% (11.4-16.9%) | Moderate |
| 12<br>13<br>14<br>15                                     | Transportation and Material Moving Occupations (53-0000) | Alemu et al., 2020 <sup>6</sup>     | n=8    | Parking Lot Attendants                                 | Cross-sectional survey | 04/23 - 04/28 | Ethiopia                   | 12.5%              | Moderate |
| 16<br>17<br>18<br>19                                     | Transportation and Material Moving Occupations (53-0000) | Alemu et al., 2020 <sup>6</sup>     | n=110  | Laborers and Freight, Stock, and Material Movers, Hand | Cross-sectional survey | 04/23 - 04/28 | Ethiopia                   | 10%                | Moderate |
| 20<br>21<br>22<br>23                                     | Transportation and Material Moving Occupations (53-0000) | Khan et al., 2020 <sup>45</sup>     | n=97   | Laborers and Freight, Stock, and Material Movers, Hand | Cross-sectional survey | 07/01 - 07/15 | India                      | 2.1% (0.5-7.9%)    | Moderate |
| 24<br>25<br>26<br>27<br>28                               | Transportation and Material Moving Occupations (53-0000) | Satpati et al., 2020 <sup>27</sup>  | n=63   | Laborers and Freight, Stock, and Material Movers, Hand | Cross-sectional survey | 07/26 - 08/08 | India                      | 12.7%              | Moderate |
| 29<br>30<br>31<br>32                                     | Not employed (mixed)*                                    | Carrat et al., 2020 <sup>4</sup>    | n=6295 | Unemployed                                             | Prospective cohort     | 05/04 - 06/23 | France                     | 4.9% (4.1-5.6%)    | Moderate |
| 33<br>34<br>35<br>36<br>37                               | Not employed (mixed)*                                    | Carrat et al., 2020 <sup>4</sup>    | n=1457 | Unemployed                                             | Prospective cohort     | 05/04 - 06/23 | France                     | 8.3% (6.4-10%)     | Moderate |
| 38<br>39<br>40<br>41<br>42<br>43<br>44<br>45<br>46<br>47 | Not employed (mixed)*                                    | Carrat et al., 2020 <sup>4</sup>    | n=306  | Unemployed                                             | Prospective cohort     | 05/04 - 06/23 | France                     | 7.2% (2.3-11.1%)   | Moderate |
|                                                          | Not employed (mixed)*                                    | Carrat et al., 2020 <sup>4</sup>    | n=125  | Unemployed                                             | Prospective cohort     | 05/04 - 06/23 | France                     | 3.8% (0.5-6.3%)    | Moderate |
|                                                          | Not employed (mixed)*                                    | Carrat et al., 2020 <sup>4</sup>    | n=402  | Unemployed                                             | Prospective cohort     | 05/04 - 06/23 | France                     | 7.8% (4.7-10.4%)   | Moderate |

|                       |                                        |         |            |                        |               |                          |                    |          |
|-----------------------|----------------------------------------|---------|------------|------------------------|---------------|--------------------------|--------------------|----------|
| Not employed (mixed)* | Chamie et al., 2020 <sup>194</sup>     | n=230   | Unemployed | Cross-sectional survey | 04/25 - 04/28 | United States of America | 4.3%               | Moderate |
| Not employed (mixed)* | McLaughlin et al., 2020 <sup>195</sup> | n=241   | Unemployed | Cross-sectional survey | 05/04 - 05/19 | United States of America | 19.3% (14.6-24.5%) | Moderate |
| Not employed (mixed)* | Merkely et al., 2020 <sup>1</sup>      | n=1095  | Unemployed | Cross-sectional survey | 05/01 - 05/16 | Hungary                  | 0.43% (0.16-0.84%) | Moderate |
| Not employed (mixed)* | Munoz et al., 2020 <sup>196</sup>      | n=905   | Unemployed | Cross-sectional survey | 07/15 - 07/16 | Argentina                | 20%                | Moderate |
| Not employed (mixed)* | Richard et al., 2020 <sup>5</sup>      | n=549   | Unemployed | Cross-sectional survey | 04/06 - 06/30 | Switzerland              | 6%                 | Low      |
| Not employed (mixed)* | Satpati et al., 2020 <sup>27</sup>     | n=47    | Unemployed | Cross-sectional survey | 07/26 - 08/08 | India                    | 2.13%              | Moderate |
| Not employed (mixed)* | Ward et al., 2020 <sup>113</sup>       | n=59369 | Unemployed | Cross-sectional survey | 09/15 - 09/28 | The United Kingdom       | 3.35%              | Moderate |

1. Merkely B, Szabó AJ, Kosztin A, et al. Novel coronavirus epidemic in the Hungarian population, a cross-sectional nationwide survey to support the exit policy in Hungary. *GeroScience*. 2020;42(4):1063-1074. doi:[10.1007/s11357-020-00226-9](https://doi.org/10.1007/s11357-020-00226-9)

2. Siddiqui S, Naushin S, Pradhan S, et al. SARS-CoV-2 antibody seroprevalence and stability in a tertiary care hospital-setting. *medRxiv*. Published online September 2020. doi:[10.1101/2020.09.02.20186486](https://doi.org/10.1101/2020.09.02.20186486)

3. Biggs HM, Harris JB, Breakwell L, et al. Estimated Community Seroprevalence of SARS-CoV-2 Antibodies Two Georgia Counties, April 28-May 3, 2020. *MMWR Morbidity and Mortality Weekly Report*. 2020;69(29):965-970. doi:[10.15585/mmwr.mm6929e2](https://doi.org/10.15585/mmwr.mm6929e2)

4. Carrat F, Lamballerie X de, Rahib D, et al. Seroprevalence of SARS-CoV-2 among adults in three regions of France following the lockdown and associated risk factors: A multicohort study. *medRxiv*. Published online September 2020:2020.09.16.20195693. doi:[10.1101/2020.09.16.20195693](https://doi.org/10.1101/2020.09.16.20195693)

5. Richard A, Wisniak A, Perez-Saez J, et al. Seroprevalence of anti-SARS-CoV-2 IgG antibodies, risk factors for infection and associated symptoms in Geneva, Switzerland: A population-based study. *medRxiv*. Published online December 2020. doi:[10.1101/2020.12.16.20248180](https://doi.org/10.1101/2020.12.16.20248180)

6. Alemu BN, Addissie A, Mamo G, et al. *Sero-Prevalence of Anti-SARS-CoV-2 Antibodies in Addis Ababa, Ethiopia*. *Microbiology*; 2020. doi:[10.1101/2020.10.13.337287](https://doi.org/10.1101/2020.10.13.337287)

7. Brehm T, Schwinge D, Lampalzer S, et al. Seroprevalence of SARS-CoV-2 antibodies among hospital workers in a German tertiary care center: A sequential follow-up study. *International Journal of Hygiene and Environmental Health*. 2021;232:113671. doi:[10.1016/j.ijheh.2020.113671](https://doi.org/10.1016/j.ijheh.2020.113671)

8. Iversen K, Bundgaard H, Hasselbalch RB, et al. Risk of COVID-19 in health-care workers in Denmark: An observational cohort study. *The Lancet Infectious diseases*. Published online August 2020. doi:[10.1016/S1473-3099\(20\)30589-2](https://doi.org/10.1016/S1473-3099(20)30589-2)

- 1  
2  
3 9. Lumley SF, O'Donnell D, Stoesser NE, et al. Antibody Status and Incidence of SARS-CoV-2 Infection in Health Care Workers. *New England Journal of Medicine*.  
4 Published online December 2020:NEJMoa2034545. doi:[10.1056/NEJMoa2034545](https://doi.org/10.1056/NEJMoa2034545)  
5
- 6 10. Shakiba M, Nazemipour M, Salari A, et al. Seroprevalence of SARS-CoV-2 in Guilan Province, Iran, April 2020. *Emerging Infectious Disease journal*. 2021;27(2).  
7 doi:[10.3201/eid2702.201960](https://doi.org/10.3201/eid2702.201960)
- 8  
9 11. Tilley K, Ayvazyan V, Martinez L, et al. A Cross-Sectional Study Examining the Seroprevalence of Severe Acute Respiratory Syndrome Coronavirus 2 Antibodies in  
10 a University Student Population. *Journal of Adolescent Health*. 2020;67(6):763-768. doi:[10.1016/j.jadohealth.2020.09.001](https://doi.org/10.1016/j.jadohealth.2020.09.001)
- 11  
12 12. Tsitsilonis OE, Paraskevis D, Lianidou E, et al. Seroprevalence of Antibodies against SARS-CoV-2 among the Personnel and Students of the National and  
13 Kapodistrian University of Athens, Greece: A Preliminary Report. *Life*. 2020;10(9):214. doi:[10.3390/life10090214](https://doi.org/10.3390/life10090214)
- 14  
15 13. Paulo Arnaldo. *Inquérito Sero-Epidemiológico de SARS-CoV-2 Na Cidade de Pemba (InCOVID 2020)*. República de Moçambique Ministério da Saúde; 2020.
- 16  
17 14. Paulo Arnaldo. *Inquérito Sero-Epidemiológico de SARS-CoV-2 Nas Cidades de Xai-Xai E Chókwè (InCOVID 2020)*. República de Moçambique Ministério da Saúde;  
18 2020.
- 19  
20 15. Nedio Mabunda. *Inquérito Sero-Epidemiológico de SARS-CoV-2 Na Cidade de Beira (InCOVID 2020)*. República de Moçambique Ministério da Saúde; 2020.
- 21  
22 16. Mussagy Mahomed. *Inquérito Sero-Epidemiológico de SARS-CoV-2 Na Cidade de Maxixe E Vila de Massinga (InCOVID 2020)*. República de Moçambique  
23 Ministério da Saúde; 2020.
- 24  
25 17. Payne DC, Smith-Jeffcoat SE, Nowak G, et al. SARS-CoV-2 Infections and Serologic Responses from a Sample of U.S. Navy Service Members - USS Theodore  
26 Roosevelt, April 2020. *MMWR Morbidity and mortality weekly report*. 2020;69(23):714-721. doi:[10.15585/mmwr.mm6923e4](https://doi.org/10.15585/mmwr.mm6923e4)
- 27  
28 18. COVID-19 Serology Tests Still Show Low Antibody Rate of 0.07%. *KBS World Radio*.
- 29  
30 19. Favara DM, McAdam K, Cooke A, et al. SARS-CoV-2 antigen and antibody prevalence among UK staff working with cancer patients during the COVID-19  
31 pandemic. *medRxiv*. Published online September 2020:2020.09.18.20197590. doi:[10.1101/2020.09.18.20197590](https://doi.org/10.1101/2020.09.18.20197590)
- 32  
33 20. Galán MI, Velasco M, Casas ML, et al. Hospital-Wide SARS-CoV-2 seroprevalence in health care workers in a Spanish teaching hospital. *Enfermedades Infecciosas y*  
34 *Microbiología Clínica*. Published online December 2020:S0213005X20304183. doi:[10.1016/j.eimc.2020.11.015](https://doi.org/10.1016/j.eimc.2020.11.015)
- 35  
36 21. Hunter BR, Dbeibo L, Weaver CS, et al. Seroprevalence of severe acute respiratory coronavirus virus 2 (SARS-CoV-2) antibodies among healthcare workers with  
37 differing levels of coronavirus disease 2019 (COVID-19) patient exposure. *Infection Control & Hospital Epidemiology*. Published online August 2020:1-2.  
38 doi:[10.1017/ice.2020.390](https://doi.org/10.1017/ice.2020.390)
- 39  
40 22. Leidner R, Frary A, Cramer J, et al. Longitudinal SARS-CoV-2 serosurveillance of over ten thousand health care workers in the Providence Oregon cohort. *medRxiv*.  
41 Published online August 2020:2020.08.16.20176107. doi:[10.1101/2020.08.16.20176107](https://doi.org/10.1101/2020.08.16.20176107)
- 42  
43 23. Martin CA, Patel P, Goss C, et al. Demographic and occupational determinants of anti-SARS-CoV-2 IgG seropositivity in hospital staff. *Journal of Public Health*.  
44 2020;(fdaa199). doi:[10.1093/pubmed/fdaa199](https://doi.org/10.1093/pubmed/fdaa199)  
45  
46  
47

- 1  
2  
3 24. Baracco A, Perotti G, Filippin A, et al. *SARS-CoV-2 Antibody Prevalence in Health Care Workers of Lodi Hospital, the COVID-19 Italian Epicentre*. Social Science  
4 Research Network; 2020.  
5  
6 25. Goenka M, Afzalpurkar S, Goenka U, et al. Seroprevalence of COVID-19 Amongst Health Care Workers in a Tertiary Care Hospital of a Metropolitan City from  
7 India. *The Journal of the Association of Physicians of India*. 2020;68(11):14-19.  
8  
9 26. Goenka MK, Shah BB, Goenka U, et al. COVID-19 prevalence among health-care workers of Gastroenterology department: An audit from a tertiary-care hospital in  
10 India. *JGH Open*. 2021;5(1):56-63. doi:[10.1002/jgh3.12447](https://doi.org/10.1002/jgh3.12447)  
11  
12 27. Satpati P, Sarangi S, Gantait K, et al. *Sero-Surveillance (IgG) of SARS-CoV-2 Among Asymptomatic General Population of Paschim Medinipur, West Bengal, India*.  
13 Infectious Diseases (except HIV/AIDS); 2020. doi:[10.1101/2020.09.12.20193219](https://doi.org/10.1101/2020.09.12.20193219)  
14  
15 28. Poustchi H, Darvishian M, Mohammadi Z, et al. SARS-CoV-2 antibody seroprevalence in the general population and high-risk occupational groups across 18 cities in  
16 Iran: A population-based cross-sectional study. *The Lancet Infectious Diseases*. 2020;0(0). doi:[10.1016/S1473-3099\(20\)30858-6](https://doi.org/10.1016/S1473-3099(20)30858-6)  
17  
18 29. Jones CR, Hamilton FW, Thompson A, Morris TT, Moran E. SARS-CoV-2 IgG seroprevalence in healthcare workers and other staff at North Bristol NHS Trust: A  
19 sociodemographic analysis. *Journal of Infection*. 2020;0(0). doi:[10.1016/j.jinf.2020.11.036](https://doi.org/10.1016/j.jinf.2020.11.036)  
20  
21 30. Anna F, Goyard S, Lalanne AI, et al. High seroprevalence but short-lived immune response to SARS-CoV-2 infection in Paris. *medRxiv*. Published online November  
22 2020:2020.10.25.20219030. doi:[10.1101/2020.10.25.20219030](https://doi.org/10.1101/2020.10.25.20219030)  
23  
24 31. Erber J, Kappler V, Haller B, et al. Strategies for infection control and prevalence of anti-SARS-CoV-2 IgG in 4,554 employees of a university hospital in Munich,  
25 Germany. Published online October 2020. doi:[10.1101/2020.10.04.20206136](https://doi.org/10.1101/2020.10.04.20206136)  
26  
27 32. Hanrath AT, Loeff IS van der, Lendrem DW, et al. SARS-CoV-2 testing of 11,884 healthcare workers at an acute NHS hospital trust in England: A retrospective  
28 analysis. *medRxiv*. Published online December 2020:2020.12.22.20242362. doi:[10.1101/2020.12.22.20242362](https://doi.org/10.1101/2020.12.22.20242362)  
29  
30 33. Rosser JI, Röltgen K, Dymock M, et al. Severe acute respiratory coronavirus virus 2 (SARS-CoV-2) seroprevalence in healthcare personnel in northern California  
31 early in the coronavirus disease 2019 (COVID-19) pandemic. *Infection Control & Hospital Epidemiology*. Published online December 2020:1-7.  
32 doi:[10.1017/ice.2020.1358](https://doi.org/10.1017/ice.2020.1358)  
33  
34 34. Silva VO, de Oliveira EL, Castejon MJ, et al. Prevalence of antibodies against sars-cov-2 in professionals of a public health laboratory at são paulo, sp, brazil.  
35 *medRxiv*. Published online October 2020. doi:[10.1101/2020.10.19.20213421](https://doi.org/10.1101/2020.10.19.20213421)  
36  
37 35. Sabourin KR, Schultz J, Romero J, et al. Risk Factors of SARS-CoV-2 Antibodies in Arapahoe County First Responders - the COVID-19 Arapahoe SErosurveillance  
38 Study (CASES) Project. *Journal of Occupational and Environmental Medicine*. Published online December 2020. doi:[10.1097/JOM.0000000000002099](https://doi.org/10.1097/JOM.0000000000002099)  
39  
40 36. Yogo N, Greenwood KL, Thompson L, et al. Point prevalence survey to evaluate the seropositivity for coronavirus disease 2019 (COVID-19) among high-risk  
41 healthcare workers. *Infection Control and Hospital Epidemiology*. Published online December 2020:1-6. doi:[10.1017/ice.2020.1370](https://doi.org/10.1017/ice.2020.1370)  
42  
43 37. Figueiredo-Campos P, Blankenhaus B, Mota C, et al. Seroprevalence of anti-SARS-CoV-2 antibodies in COVID-19 patients and healthy volunteers up to 6 months  
44 post disease onset. *European Journal of Immunology*. 2020;50(12):2025-2040. doi:[10.1002/eji.202048970](https://doi.org/10.1002/eji.202048970)  
45  
46  
47



- 1  
2  
3 38. Gonçalves J, Sousa RL, Jacinto MJ, et al. Evaluating SARS-CoV-2 Seroconversion Following Relieve of Confinement Measures. *Frontiers in Medicine*. 2020;7.  
4 doi:[10.3389/fmed.2020.603996](https://doi.org/10.3389/fmed.2020.603996)  
5
- 6 39. Fontanet A, Grant R, Tondeur L, et al. SARS-CoV-2 infection in primary schools in northern France: A retrospective cohort study in an area of high transmission.  
7 *medRxiv*. Published online June 2020:2020.06.25.20140178. doi:[10.1101/2020.06.25.20140178](https://doi.org/10.1101/2020.06.25.20140178)  
8
- 9 40. Torres JP, Piñera C, De La Maza V, et al. Severe Acute Respiratory Syndrome Coronavirus 2 Antibody Prevalence in Blood in a Large School Community Subject to  
10 a Coronavirus Disease 2019 Outbreak: A Cross-sectional Study. *Clinical Infectious Diseases*. Published online July 2020:ciaa955. doi:[10.1093/cid/ciaa955](https://doi.org/10.1093/cid/ciaa955)  
11
- 12 41. Halatoko WA, KONU YR, Gbeasor-Komlanvi FA, et al. Prevalence of SARS-CoV-2 among high-risk populations in Lom&Eacute; (Togo) in 2020. *medRxiv*.  
13 Published online August 2020:2020.08.07.20163840. doi:[10.1101/2020.08.07.20163840](https://doi.org/10.1101/2020.08.07.20163840)  
14
- 15 42. Slusser S. MLB antibody study: 0.7% of those tested had been exposed to coronavirus. *San Francisco Chronicle*. Published online May 2020.  
16
- 17 43. Vince A, Zadro R, Šostar Z, et al. SARS-CoV-2 Seroprevalence in a Cohort of Asymptomatic, RT-PCR Negative Croatian First League Football Players. *medRxiv*.  
18 Published online November 2020:2020.10.30.20223230. doi:[10.1101/2020.10.30.20223230](https://doi.org/10.1101/2020.10.30.20223230)  
19
- 20 44. Mack D, Gärtner BC, Rössler A, et al. Prevalence of SARS-CoV-2 IgG antibodies in a large prospective cohort study of elite football players in Germany (May/June  
21 2020): Implications for a testing protocol in asymptomatic individuals and estimation of the rate of undetected cases. *Clinical Microbiology and Infection*.  
22 2020;27(3):473.e1-473.e4. doi:[10.1016/j.cmi.2020.11.033](https://doi.org/10.1016/j.cmi.2020.11.033)  
23
- 24 45. Khan SMS, Qurieshi MA, Haq I, et al. Seroprevalence of SARS-CoV-2 specific IgG antibodies in District Srinagar, northern India A cross-sectional study. *PLOS*  
25 *ONE*. 2020;15(11):e0239303. doi:[10.1371/journal.pone.0239303](https://doi.org/10.1371/journal.pone.0239303)  
26
- 27 46. Akinbami LJ, Vuong N, Petersen LR, et al. SARS-CoV-2 Seroprevalence among Healthcare, First Response, and Public Safety Personnel, Detroit Metropolitan Area,  
28 Michigan, USA, May/June 2020 - Volume 26, Number 12/December 2020 - Emerging Infectious Diseases journal - CDC. Published online December 2020.  
29 doi:[10.3201/eid2612.203764](https://doi.org/10.3201/eid2612.203764)  
30
- 31 47. Amendola A, Tanzi E, Folgori L, et al. Low seroprevalence of SARS-CoV-2 infection among healthcare workers of the largest children hospital in Milan during the  
32 pandemic wave. *Infection Control & Hospital Epidemiology*. Published online August 2020:1-2. doi:[10.1017/ice.2020.401](https://doi.org/10.1017/ice.2020.401)  
33
- 34 48. Paulo Arnaldo. *Inquérito Sero-Epidemiológico de SARS-CoV-2 Na Cidade de Quelimane (InCOVID 2020)*. República de Moçambique Ministério da Saúde; 2020.  
35
- 36 49. Bal A, Brengel-Pesce K, Gaymard A, et al. Clinical and microbiological assessments of COVID-19 in healthcare workers: A prospective longitudinal study. *medRxiv*.  
37 Published online November 2020:2020.11.04.20225862. doi:[10.1101/2020.11.04.20225862](https://doi.org/10.1101/2020.11.04.20225862)  
38
- 39 50. Fernández-Rivas G, Quirant-Sánchez B, González V, et al. Seroprevalence of SARS-CoV-2 IgG Specific Antibodies among Healthcare Workers in the Northern  
40 Metropolitan Area of Barcelona, Spain, after the first pandemic wave. *medRxiv*. Published online June 2020:2020.06.24.20135673. doi:[10.1101/2020.06.24.20135673](https://doi.org/10.1101/2020.06.24.20135673)  
41
- 42 51. Bardai G, Ouellet J, Engelhardt T, Bertolizio G, Wu Z, Rauch F. Prevalence of SARS-CoV-2 infections in a pediatric orthopedic hospital. von Ungern-Sternberg B,  
43 ed. *Pediatric Anesthesia*. 2021;31(2):247-248. doi:[10.1111/pan.14047](https://doi.org/10.1111/pan.14047)  
44  
45  
46  
47



- 1  
2  
3 52. Blairon L, Mokrane S, Wilmet A, et al. Large-scale, molecular and serological SARS-CoV-2 screening of healthcare workers in a 4-site public hospital in Belgium  
4 after COVID-19 outbreak. *Journal of Infection*. Published online July 2020:S0163445320305144. doi:[10.1016/j.jinf.2020.07.033](https://doi.org/10.1016/j.jinf.2020.07.033)  
5
- 6 53. Moreno Borraz LA, Giménez López M, Carrera Lasfuentes P, et al. Prevalencia de infección por coronavirus SARS-CoV-2 en pacientes y profesionales de un hospital  
7 de media y larga estancia en España. *Revista Española de Geriatria y Gerontología*. 2020;56(2):75-80. doi:[10.1016/j.regg.2020.10.005](https://doi.org/10.1016/j.regg.2020.10.005)  
8
- 9 54. Brunner WM, Hirabayashi L, Krupa NL, et al. Severe acute respiratory coronavirus virus 2 (SARS-CoV-2) IgG results among healthcare workers in a rural upstate  
10 New York hospital system. *Infection Control & Hospital Epidemiology*. Published online October 2020:1-4. doi:[10.1017/ice.2020.1296](https://doi.org/10.1017/ice.2020.1296)  
11
- 12 55. Carozzi FM, Cusi MG, Pistello M, et al. Detection of asymptomatic SARS-CoV-2 infections among healthcare workers: Results from a large-scale screening program  
13 based on rapid serological testing. *medRxiv*. Published online August 2020. doi:[10.1101/2020.07.30.20149567](https://doi.org/10.1101/2020.07.30.20149567)  
14
- 15 56. Vilibic-Cavlek T, Stevanovic V, Tabain I, et al. Severe acute respiratory syndrome coronavirus 2 seroprevalence among personnel in the healthcare facilities of  
16 Croatia, 2020. *Revista da Sociedade Brasileira de Medicina Tropical*. 2020;53. doi:[10.1590/0037-8682-0458-2020](https://doi.org/10.1590/0037-8682-0458-2020)  
17
- 18 57. Chibwana MG, Jere KC, kamng'ona R, et al. High SARS-CoV-2 seroprevalence in Health Care Workers but relatively low numbers of deaths in urban Malawi.  
19 *medRxiv*. Published online August 2020:2020.07.30.20164970. doi:[10.1101/2020.07.30.20164970](https://doi.org/10.1101/2020.07.30.20164970)  
20
- 21 58. Coffman B. New Co-Immunity Project data show COVID-19 infection among health care workers may be lower than the general population | UofL News. *UofLNews*.  
22 Published online August 2020.  
23
- 24 59. Cooper DJ, Lear S, Watson L, et al. A prospective study of risk factors associated with seroprevalence of SARS-CoV-2 antibodies in healthcare workers at a large UK  
25 teaching hospital. *medRxiv*. Published online November 2020:2020.11.03.20220699. doi:[10.1101/2020.11.03.20220699](https://doi.org/10.1101/2020.11.03.20220699)  
26
- 27 60. Denyer S. Japanese firm's blanket testing of employees could serve as model. *LMT Online*. Published online June 2020.  
28
- 29 61. Dimeglio C, Herin F, Miedougé M, et al. Screening for SARS-CoV-2 antibodies among healthcare workers in a university hospital in southern France. *Journal of*  
30 *Infection*. 2020;0(0). doi:[10.1016/j.jinf.2020.09.035](https://doi.org/10.1016/j.jinf.2020.09.035)  
31
- 32 62. Fuereder T, Berghoff AS, Heller G, et al. SARS-CoV-2 seroprevalence in oncology healthcare professionals and patients with cancer at a tertiary care centre during  
33 the COVID-19 pandemic. *ESMO Open*. 2020;5(5). doi:[10.1136/esmoopen-2020-000889](https://doi.org/10.1136/esmoopen-2020-000889)  
34
- 35 63. Fusco FM, Pisaturo M, Iodice V, et al. COVID-19 among healthcare workers in a specialist infectious diseases setting in Naples, Southern Italy: Results of a cross-  
36 sectional surveillance study. *Journal of Hospital Infection*. 2020;105(4):596-600. doi:[10.1016/j.jhin.2020.06.021](https://doi.org/10.1016/j.jhin.2020.06.021)  
37
- 38 64. Geraci L. Antibody tests show just 2% exposure rate to COVID-19. *The Lancaster News*. Published online May 2020.  
39
- 40 65. Eduardo Samo Gudo. *Inquérito Sero-epidemiológico de SARS-CoV-2 na Cidade de Nampula*. República de Moçambique Ministério da Saúde; 2020:19.  
41
- 42 66. Hackner K, Errhalt P, Willheim M, et al. Diagnostic accuracy of two commercially available rapid assays for detection of IgG and IgM antibodies to SARS-CoV-2  
43 compared to ELISA in a low-prevalence population. *Research Square*. Published online August 2020. doi:[10.21203/rs.3.rs-50887/v1](https://doi.org/10.21203/rs.3.rs-50887/v1)  
44  
45  
46  
47

- 1  
2  
3 67. Haq M, Rehman A, Noor M, et al. Seroprevalence and Risk Factors of SARS CoV-2 in Health Care Workers of Tertiary-Care Hospitals in the Province of Khyber  
4 Pakhtunkhwa, Pakistan. *medRxiv*. Published online September 2020:2020.09.29.20203125. doi:[10.1101/2020.09.29.20203125](https://doi.org/10.1101/2020.09.29.20203125)  
5
- 6 68. He L, Zeng Y, Zeng C, et al. Positive Rate of Serology and RT-PCR for COVID-19 among healthcare workers during different periods in Wuhan, China. *Journal of*  
7 *Infection*. Published online August 2020. doi:[10.1016/j.jinf.2020.08.027](https://doi.org/10.1016/j.jinf.2020.08.027)  
8
- 9 69. Herzberg J, Vollmer T, Fischer B, et al. Prospective Sero-epidemiological Evaluation of SARS-CoV-2 among Health Care Workers in a German Secondary Care  
10 Hospital. *International Journal of Infectious Diseases*. 2021;102:136-143. doi:[10.1016/j.ijid.2020.10.026](https://doi.org/10.1016/j.ijid.2020.10.026)  
11
- 12 70. Jeremias A, Nguyen J, Levine J, et al. Prevalence of SARS-CoV-2 Infection Among Health Care Workers in a Tertiary Community Hospital. *JAMA Internal*  
13 *Medicine*. Published online August 2020. doi:[10.1001/jamainternmed.2020.4214](https://doi.org/10.1001/jamainternmed.2020.4214)  
14
- 15 71. Jespersen S, Mikkelsen S, Greve T, et al. Severe Acute Respiratory Syndrome Coronavirus 2 Seroprevalence Survey Among 17 971 Healthcare and Administrative  
16 Personnel at Hospitals, Prehospital Services, and Specialist Practitioners in the Central Denmark Region. *Clinical Infectious Diseases*. Published online October  
17 2020:ciaa1471. doi:[10.1093/cid/ciaa1471](https://doi.org/10.1093/cid/ciaa1471)  
18
- 19 72. Kassem AM, Talaat H, Shawky S, et al. SARS-CoV-2 infection among healthcare workers of a gastroenterological service in a tertiary care facility. *Arab Journal of*  
20 *Gastroenterology*. 2020;21(3):151-155. doi:[10.1016/j.ajg.2020.07.005](https://doi.org/10.1016/j.ajg.2020.07.005)  
21
- 22 73. Kern PM, Müller H-H, Menzel T, Weisser H. Studie zur Immunität gegen SARS-CoV-2: Keine signifikante humorale Immunität gegen SARS-CoV-2 im  
23 medizinischen Personal eines Klinikums der Maximalversorgung und in der Stadtregion Fulda. *Der Klinikarzt*. 2020;49(06):268-273. doi:[10.1055/a-1198-1243](https://doi.org/10.1055/a-1198-1243)  
24
- 25 74. Khalil A, Hill R, Wright A, Ladhani S, O'Brien P. SARS-CoV-2-Specific Antibody Detection in Healthcare Workers in a UK Maternity Hospital: Correlation With  
26 SARS-CoV-2 RT-PCR Results. *Clinical Infectious Diseases*. 2020;(ciaa893). doi:[10.1093/cid/ciaa893](https://doi.org/10.1093/cid/ciaa893)  
27
- 28 75. Kumar A, Sathyapalan D, Ramachandran A, Subhash K, Biswas L, Beena KV. SARS-CoV-2 antibodies in healthcare workers in a large university hospital, Kerala,  
29 India. *Clinical Microbiology and Infection*. 2021;27(3):481-483. doi:[10.1016/j.cmi.2020.09.013](https://doi.org/10.1016/j.cmi.2020.09.013)  
30
- 31 76. Lackermair K, William F, Grzanna N, et al. Infection with SARS-CoV-2 in primary care health care workers assessed by antibody testing. *Family Practice*. Published  
32 online August 2020:cmaa078. doi:[10.1093/fampra/cmaa078](https://doi.org/10.1093/fampra/cmaa078)  
33
- 34 77. Lahner E, Dilaghi E, Prestigiacomo C, et al. Prevalence of Sars-Cov-2 Infection in Health Workers (HWs) and Diagnostic Test Performance: The Experience of a  
35 Teaching Hospital in Central Italy. *International Journal of Environmental Research and Public Health*. 2020;17(12). doi:[10.3390/ijerph17124417](https://doi.org/10.3390/ijerph17124417)  
36
- 37 78. Liu M, Cheng S-Z, Xu K-W, et al. Use of personal protective equipment against coronavirus disease 2019 by healthcare professionals in Wuhan, China: Cross  
38 sectional study. *BMJ*. 2020;369. doi:[10.1136/bmj.m2195](https://doi.org/10.1136/bmj.m2195)  
39
- 40 79. Liu T, Wu S, Tao H, Zeng G, Zhou F, Wang X. Prevalence of IgG Antibodies to SARS-CoV-2 in Wuhan Implications for the Longevity of Antibodies Against  
41 SARS-CoV-2. *Research Square*. Published online November 2020. doi:[10.21203/rs.3.rs-99748/v1](https://doi.org/10.21203/rs.3.rs-99748/v1)  
42
- 43 80. Lorenzo D, Carrisi C. COVID-19 exposure risk for family members of healthcare workers: An observational study. *International Journal of Infectious Diseases*.  
44 2020;98:287-289. doi:[10.1016/j.ijid.2020.06.106](https://doi.org/10.1016/j.ijid.2020.06.106)  
45  
46  
47

- 1  
2  
3 81. Mussagy Mahomed. *Inquérito Sero-Epidemiológico de SARS-CoV-2 Na Cidade de Tete (InCOVID 2020)*. República de Moçambique Ministério da Saúde; 2020.
- 4  
5 82. Arlete Mahumane. *Inquérito Sero-Epidemiológico de SARS-CoV-2 Na Cidade de Chimoio (InCOVID 2020)*. República de Moçambique Ministério da Saúde; 2020.
- 6  
7 83. Majdoubi A, Michalski C, O'Connell SE, et al. Antibody reactivity to SARS-CoV-2 is common in unexposed adults and infants under 6 months. *medRxiv*. Published  
8 online November 2020:2020.10.05.20206664. doi:[10.1101/2020.10.05.20206664](https://doi.org/10.1101/2020.10.05.20206664)
- 9  
10 84. Majiya H, Aliyu-Paiko M, Balogu VT, et al. Seroprevalence of COVID-19 in Niger State. *medRxiv*. Published online August 2020. doi:[10.1101/2020.08.04.20168112](https://doi.org/10.1101/2020.08.04.20168112)
- 11  
12 85. Fill Malfertheiner S, Brandstetter S, Roth S, et al. Immune response to SARS-CoV-2 in health care workers following a COVID-19 outbreak: A prospective  
13 longitudinal study. *Journal of Clinical Virology*. 2020;130:104575. doi:[10.1016/j.jcv.2020.104575](https://doi.org/10.1016/j.jcv.2020.104575)
- 14  
15 86. Martin C, Montesinos I, Dauby N, et al. Dynamics of SARS-CoV-2 RT-PCR positivity and seroprevalence among high-risk healthcare workers and hospital staff.  
16 *Journal of Hospital Infection*. 2020;106(1):102-106. doi:[10.1016/j.jhin.2020.06.028](https://doi.org/10.1016/j.jhin.2020.06.028)
- 17  
18 87. de Melo MS, Borges LP, de Souza DRV, et al. *Anti-SARS-CoV-2 IgM and IgG Antibodies in Health Workers in Sergipe, Brazil*. *Infectious Diseases (except  
19 HIV/AIDS)*; 2020. doi:[10.1101/2020.09.24.20200873](https://doi.org/10.1101/2020.09.24.20200873)
- 20  
21 88. Morcuende M, Guglielminotti J, Landau R. Anesthesiologists' and Intensive Care Providers' Exposure to COVID-19 Infection in a New York City Academic Center:  
22 A Prospective Cohort Study Assessing Symptoms and COVID-19 Antibody Testing. *Anesthesia and analgesia*. 2020;131(3):669-676.  
doi:[10.1213/ANE.0000000000005056](https://doi.org/10.1213/ANE.0000000000005056)
- 23  
24 89. Moscola J, Sembajwe G, Jarrett M, et al. Prevalence of SARS-CoV-2 Antibodies in Health Care Personnel in the New York City Area. *JAMA*. 2020;324(9):893-895.  
25 doi:[10.1001/jama.2020.14765](https://doi.org/10.1001/jama.2020.14765)
- 26  
27 90. Nishida T, Iwahashi H, Yamauchi K, et al. Seroprevalence of SARS-CoV-2 Antibodies Among 925 Staff Members in an Urban Hospital Accepting COVID-19  
28 Patients in Osaka Prefecture, Japan. *medRxiv*. Published online January 2020:2020.09.10.20191866. doi:[10.1101/2020.09.10.20191866](https://doi.org/10.1101/2020.09.10.20191866)
- 29  
30 91. Olalla J, Correa AM, Martín-Escalante MD, et al. Search for asymptomatic carriers of SARS-CoV-2 in healthcare workers during the pandemic: A Spanish  
31 experience. *QJM: An International Journal of Medicine*. 2020;(hcaa238). doi:[10.1093/qjmed/hcaa238](https://doi.org/10.1093/qjmed/hcaa238)
- 32  
33 92. Pallett SJC, Rayment M, Patel A, et al. Point-of-care serological assays for delayed SARS-CoV-2 case identification among health-care workers in the UK: A  
34 prospective multicentre cohort study. *The Lancet Respiratory Medicine*. 2020;8(9):885-894. doi:[10.1016/S2213-2600\(20\)30315-5](https://doi.org/10.1016/S2213-2600(20)30315-5)
- 35  
36 93. Péré H, Wack M, Védie B, et al. Sequential SARS-CoV-2 IgG assays as confirmatory strategy to confirm equivocal results: Hospital-wide antibody screening in 3,569  
37 staff health care workers in Paris. *Journal of Clinical Virology*. 2020;132:104617. doi:[10.1016/j.jcv.2020.104617](https://doi.org/10.1016/j.jcv.2020.104617)
- 38  
39 94. Poulidakos D, Sinha S, Kalra PA. SARS-CoV-2 antibody screening in healthcare workers in a tertiary centre in North West England. *Journal of clinical virology : the  
40 official publication of the Pan American Society for Clinical Virology*. 2020;129:104545-104545. doi:[10.1016/j.jcv.2020.104545](https://doi.org/10.1016/j.jcv.2020.104545)
- 41  
42 95. Psychogiou M, Karabinis A, Pavlopoulou I, et al. Antibodies against SARS-CoV-2 among health care workers in a country with low burden of COVID-19. *medRxiv*.  
43 Published online June 2020. doi:[10.1101/2020.06.23.20137620](https://doi.org/10.1101/2020.06.23.20137620)
- 44  
45  
46  
47

- 1  
2  
3 96. Kolthur-Seetharam U, Shah D, Shastri J, et al. *SARS-CoV2 Serological Survey in Mumbai by NITI-BMC-TIFR: Preliminary Report of Round-2*. NITI-BMC-TIFR; 2020.  
4  
5  
6 97. Shields AM, Faustini SE, Perez-Toledo M, et al. SARS-CoV-2 seroconversion in health care workers. *medRxiv*. Published online May 2020:2020.05.18.20105197.  
7 doi:[10.1101/2020.05.18.20105197](https://doi.org/10.1101/2020.05.18.20105197)  
8  
9 98. Ismael Amaral Silva PA, Ismael C, Marchon da Silva C, Domenge C. 1761P Universal screening of SARS-CoV-2 of oncology healthcare workers a Brazilian  
10 experience. *Annals of Oncology*. 2020;31:S1024. doi:[10.1016/j.annonc.2020.08.1825](https://doi.org/10.1016/j.annonc.2020.08.1825)  
11  
12 99. Solodky ML, Galvez C, Russias B, et al. Lower detection rates of SARS-COV2 antibodies in cancer patients versus health care workers after symptomatic COVID-  
13 19. *Annals of Oncology*. 2020;31(8):1087-1088. doi:[10.1016/j.annonc.2020.04.475](https://doi.org/10.1016/j.annonc.2020.04.475)  
14  
15 100. Soriano V, Meiriño R, Corral O, Guallar MP. Severe Acute Respiratory Syndrome Coronavirus 2 Antibodies in Adults in Madrid, Spain. *Clinical Infectious*  
16 *Diseases*. 2020;(ciaa769). doi:[10.1093/cid/ciaa769](https://doi.org/10.1093/cid/ciaa769)  
17  
18 101. Istituto Nazionale di Statistica. *PRIMI RISULTATI DELL'INDAGINE DI SIEROPREVALENZA SUL SARS-CoV-2*. Istituto Nazionale di Statistica; 2020.  
19  
20 102. Steensels D, Oris E, Coninx L, et al. Hospital-Wide SARS-CoV-2 Antibody Screening in 3056 Staff in a Tertiary Center in Belgium. *JAMA*. 2020;(7501160).  
21 doi:[10.1001/jama.2020.11160](https://doi.org/10.1001/jama.2020.11160)  
22  
23 103. Stock AD, Bader ER, Cezayirli P, et al. COVID-19 Infection Among Healthcare Workers: Serological Findings Supporting Routine Testing. *Frontiers in Medicine*.  
24 2020;7. doi:[10.3389/fmed.2020.00471](https://doi.org/10.3389/fmed.2020.00471)  
25  
26 104. Takita M, Matsumura T, Yamamoto K, et al. Geographical Profiles of COVID-19 Outbreak in Tokyo: An Analysis of the Primary Care ClinicBased Point-of-Care  
27 Antibody Testing. *Journal of Primary Care & Community Health*. 2020;11:215013272094269. doi:[10.1177/2150132720942695](https://doi.org/10.1177/2150132720942695)  
28  
29 105. Tong X, Ning M, Huang R, et al. Surveillance of SARS-CoV-2 infection among frontline health care workers in Wuhan during COVID-19 outbreak. *Immunity,*  
30 *Inflammation and Disease*. 2020;8(4):840-843. doi:[10.1002/iid3.340](https://doi.org/10.1002/iid3.340)  
31  
32 106. Trieu M-C, Bansal A, Madsen A, et al. SARS-CoV-2 Specific Neutralizing Antibody Responses in Norwegian Health Care Workers After the First Wave of COVID-  
33 19 Pandemic: A Prospective Cohort Study. *The Journal of Infectious Diseases*. 2020;2021-(jiaa737). doi:[10.1093/infdis/jiaa737](https://doi.org/10.1093/infdis/jiaa737)  
34  
35 107. Tu D, Shu J, Wu X, et al. Immunological detection of serum antibodies in pediatric medical workers exposed to varying levels of SARS-CoV-2. *The Journal of*  
36 *Infection*. 2021;82(1):159-198. doi:[10.1016/j.jinf.2020.07.023](https://doi.org/10.1016/j.jinf.2020.07.023)  
37  
38 108. Valdivia A, Torres I, Huntley D, et al. Caveats in interpreting SARS-CoV-2 IgM+/IgG- antibody profile in asymptomatic health care workers. *Journal of Medical*  
39 *Virology*. 2020;n/a(n/a). doi:[10.1002/jmv.26400](https://doi.org/10.1002/jmv.26400)  
40  
41 109. Chafloque-Vasquez RA, Pampa-Espinoza L, Salinas JCC. Seroprevalence of COVID-19 in workers in a hospital in the Peruvian Amazon. *ACTA MEDICA*  
42 *PERUANA*. 2020;37(3). doi:[10.35663/amp.2020.373.1050](https://doi.org/10.35663/amp.2020.373.1050)  
43  
44 110. Edna Viegas. *Inquérito Sero-Epidemiológico de SARS-CoV-2 Na Cidade de Maputo (InCOVID 2020)*. República de Moçambique Ministério da Saúde; 2020.  
45  
46  
47

- 1  
2  
3 111. Vlachoyiannopoulos P, Alexopoulos H, Apostolidi I, et al. Anti-SARS-CoV-2 antibody detection in healthcare workers of two tertiary hospitals in Athens, Greece. *Clinical Immunology*. 2020;221:108619. doi:[10.1016/j.clim.2020.108619](https://doi.org/10.1016/j.clim.2020.108619)
- 4  
5  
6 112. Dalla Volta A, Valcamonico F, Pedersini R, et al. The Spread of SARS-CoV-2 Infection Among the Medical Oncology Staff of ASST Spedali Civili of Brescia: Efficacy of Preventive Measures. *Frontiers in Oncology*. 2020;10:1574. doi:[10.3389/fonc.2020.01574](https://doi.org/10.3389/fonc.2020.01574)
- 7  
8  
9 113. Ward H, Cooke G, Atchison C, et al. Declining prevalence of antibody positivity to SARS-CoV-2: A community study of 365,000 adults. *medRxiv*. Published online October 2020:2020.10.26.20219725. doi:[10.1101/2020.10.26.20219725](https://doi.org/10.1101/2020.10.26.20219725)
- 10  
11  
12 114. Xiong S, Guo C, Dittmer U, Zheng X, Wang B. The prevalence of antibodies to SARS-CoV-2 in asymptomatic healthcare workers with intensive exposure to COVID-19. *medRxiv*. Published online June 2020:2020.05.28.20110767. doi:[10.1101/2020.05.28.20110767](https://doi.org/10.1101/2020.05.28.20110767)
- 13  
14  
15 115. Zhang J, Liu J, Li N, et al. Serological detection of 2019-nCoV respond to the epidemic: A useful complement to nucleic acid testing. *medRxiv*. Published online March 2020:2020.03.04.20030916. doi:[10.1101/2020.03.04.20030916](https://doi.org/10.1101/2020.03.04.20030916)
- 16  
17  
18 116. Zhao D, Wang M, Wang M, et al. Asymptomatic infection by SARS-CoV-2 in healthcare workers: A study in a large teaching hospital in Wuhan, China. *International Journal of Infectious Diseases*. 2020;99:219-225. doi:[10.1016/j.ijid.2020.07.082](https://doi.org/10.1016/j.ijid.2020.07.082)
- 19  
20  
21 117. Ahmad K, Rezvanizadeh V, Dahal S, et al. COVID-19 IgG/IgM antibody testing in Los Angeles County, California. *European Journal of Clinical Microbiology & Infectious Diseases*. Published online November 2020. doi:[10.1007/s10096-020-04111-3](https://doi.org/10.1007/s10096-020-04111-3)
- 22  
23  
24 118. Halbrook M, Gadoth A, Martin-Blais R, et al. Incidence of SARS-CoV-2 infection among asymptomatic frontline health workers in Los Angeles County, California. *medRxiv*. Published online November 2020:2020.11.18.20234211. doi:[10.1101/2020.11.18.20234211](https://doi.org/10.1101/2020.11.18.20234211)
- 25  
26  
27 119. Iwuji K, Islam E, Berdine G, Nugent K, Test V, Tijerina A. Prevalence of Coronavirus Antibody Among First Responders in Lubbock, Texas. *Journal of Primary Care & Community Health*. 11:2150132720971390. doi:[10.1177/2150132720971390](https://doi.org/10.1177/2150132720971390)
- 28  
29  
30 120. Parker-Magyar A. Few among Long Hill first responders test positive for COVID-19 antibodies. *Echoes Sentinel*. Published online June 2020.
- 31  
32  
33 121. Caban-Martinez AJ, Schaefer-Solle N, Santiago K, et al. Epidemiology of SARS-CoV-2 antibodies among firefighters/paramedics of a US fire department: A cross-sectional study. *Occupational and Environmental Medicine*. 2020;77(12):857-861. doi:[10.1136/oemed-2020-106676](https://doi.org/10.1136/oemed-2020-106676)
- 34  
35  
36 122. Staletovich J. South Florida Cities Begin Testing Employees For COVID-19 Antibodies. *WLRN*. Published online May 2020.
- 37  
38  
39 123. Hibino M, Iwabuchi S, Munakata H. SARS-CoV-2 IgG seroprevalence among medical staff in a general hospital that treated patients with COVID-19 in Japan: Retrospective evaluation of nosocomial infection control. *Journal of Hospital Infection*. 2020;107:103-104. doi:[10.1016/j.jhin.2020.10.001](https://doi.org/10.1016/j.jhin.2020.10.001)
- 40  
41  
42 124. Calcagno A, Ghisetti V, Emanuele T, et al. Risk for SARS-CoV-2 Infection in Healthcare Workers, Turin, Italy. *Emerging Infectious Diseases*. 2021;27(1):303-305. doi:[10.3201/eid2701.203027](https://doi.org/10.3201/eid2701.203027)
- 43  
44  
45 125. Alharbi SA, Almutairi AZ, Jan AA, Alkhalify AM. Enzyme-Linked Immunosorbent Assay for the Detection of Severe Acute Respiratory Syndrome Coronavirus 2 (SARS-CoV-2) IgM/IgA and IgG Antibodies Among Healthcare Workers. *Cureus*. Published online September 2020. doi:[10.7759/cureus.10285](https://doi.org/10.7759/cureus.10285)
- 46  
47



- 1  
2  
3 126. Chau NVV, Toan LM, Man DNH, et al. Absence of SARS-CoV-2 antibodies in health care workers of a tertiary referral hospital for COVID-19 in southern  
4 Vietnam. *Journal of Infection*. 2020;82(1):e36-e37. doi:[10.1016/j.jinf.2020.11.018](https://doi.org/10.1016/j.jinf.2020.11.018)  
5
- 6 127. Khan MS, Haq I, Qurieshi MA, et al. SARS-CoV-2 seroprevalence in healthcare workers of dedicated-COVID hospitals and nonCOVID hospitals of District  
7 Srinagar, Kashmir. *medRxiv*. Published online October 2020:2020.10.23.20218164. doi:[10.1101/2020.10.23.20218164](https://doi.org/10.1101/2020.10.23.20218164)  
8
- 9 128. Costa SF, Giavina-Bianchi P, Buss L, et al. SARS-CoV-2 seroprevalence and risk factors among oligo/asymptomatic healthcare workers(HCW): Estimating the  
10 impact of community transmission. *Clinical Infectious Diseases*. 2020;(c1aa1845). doi:[10.1093/cid/c1aa1845](https://doi.org/10.1093/cid/c1aa1845)  
11
- 12 129. Mohr N, Harland K, Krishnadasan A, Santibanez S, Talan D. Diagnosed and Undiagnosed COVID-19 in US Emergency Department Health Care Personnel: A  
13 Cross-sectional Analysis. *Annals of Emergency Medicine*. Published online December 2020. doi:[10.1016/j.annemergmed.2020.12.007](https://doi.org/10.1016/j.annemergmed.2020.12.007)  
14
- 15 130. Noor M, Haq M, Ul Haq N, et al. Does Working in a COVID-19 Receiving Health Facility Influence Seroprevalence to SARS-CoV-2? *Cureus*. Published online  
16 November 2020. doi:[10.7759/cureus.11389](https://doi.org/10.7759/cureus.11389)  
17
- 18 131. Singhal T, Shah S, Naik R, Kazi A, Thakkar P. Prevalence of COVID-19 Antibodies in Healthcare Workers at the Peak of the Pandemic in Mumbai, India: A  
19 Preliminary Study. *Indian Journal of Medical Microbiology*. 2020;38(3):461-463. doi:[10.4103/ijmm.IJMM\\_20\\_308](https://doi.org/10.4103/ijmm.IJMM_20_308)  
20
- 21 132. Dacosta-Urbieta A, Rivero-Calle I, Pardo-Seco J, et al. Seroprevalence of SARS-CoV-2 Among Pediatric Healthcare Workers in Spain. *Frontiers in Pediatrics*.  
22 2020;8. doi:[10.3389/fped.2020.00547](https://doi.org/10.3389/fped.2020.00547)  
23
- 24 133. Sartore-Bianchi A, Patelli G, Tosi F, et al. INCIDENCE OF SARS-COV-2 INFECTION IN PATIENTS WITH ACTIVE CANCER: MONO-INSTITUTIONAL  
25 SERIES OF A COMPREHENSIVE CANCER INSTITUTION IN LOMBARDY DURING THE COVID-19 PANDEMIC (NIGUARDA CANCER CENTER, MILANO,  
26 ITALY). In: *Tumori Journal*. Vol 106. AIOM Abstracts.; 2020:1-215. doi:[10.1177/0300891620953388](https://doi.org/10.1177/0300891620953388)  
27
- 28 134. Brousseau N, Morin L, Ouakki M, et al. *COVID-19 : Étude de séroprévalence chez des travailleurs de la santé de centres hospitaliers au Québec*. Institut National  
29 de Sante Publique du Quebec; 2020:20.  
30
- 31 135. Chen Y, Tong X, Wang J, et al. High SARS-CoV-2 antibody prevalence among healthcare workers exposed to COVID-19 patients. *The Journal of Infection*.  
32 2020;81(3):420-426. doi:[10.1016/j.jinf.2020.05.067](https://doi.org/10.1016/j.jinf.2020.05.067)  
33
- 34 136. Favara DM, Cooke A, Doffinger R, McAdam K, Corrie P, Ainsworth NL. COVID-19 Serology in Oncology Staff Study: Understanding SARS-CoV-2 in the  
35 Oncology Workforce. *Clinical Oncology (Royal College of Radiologists (Great Britain))*. 2021;33(1):e61-e63. doi:[10.1016/j.clon.2020.07.015](https://doi.org/10.1016/j.clon.2020.07.015)  
36
- 37 137. Fujita K, Shinpei Kada, Osamu Kanai, et al. Quantitative SARS-CoV-2 antibody screening of healthcare workers in the southern part of Kyoto city during the  
38 COVID-19 peri-pandemic period. *medRxiv*. Published online May 2020.  
39
- 40 138. Godbout EJ, Pryor R, Harmon M, et al. Severe acute respiratory coronavirus virus 2 (SARS-CoV-2) seroprevalence among healthcare workers in a low prevalence  
41 region. *Infection Control & Hospital Epidemiology*. Published online December 2020:1-3. doi:[10.1017/ice.2020.1374](https://doi.org/10.1017/ice.2020.1374)  
42
- 43 139. Houlihan CF, Vora N, Byrne T, et al. Pandemic peak SARS-CoV-2 infection and seroconversion rates in London frontline health-care workers. *The Lancet*.  
44 2020;396(10246):e6-e7. doi:[10.1016/S0140-6736\(20\)31484-7](https://doi.org/10.1016/S0140-6736(20)31484-7)  
45  
46  
47

- 1  
2  
3 140. Insúa C, Stedile G, Figueroa V, et al. Seroprevalence of SARS-CoV-2 antibodies among physicians from a children's hospital. *Archivos Argentinos De Pediatría*.  
4 2020;118(6):381-385. doi:[10.5546/aap.2020.eng.381](https://doi.org/10.5546/aap.2020.eng.381)  
5
- 6 141. Kohler PP, Kahlert CR, Sumer J, et al. Prevalence of SARS-CoV-2 antibodies among Swiss hospital workers: Results of a prospective cohort study. *Infection*  
7 *Control & Hospital Epidemiology*. Published online October 2020:1-5. doi:[10.1017/ice.2020.1244](https://doi.org/10.1017/ice.2020.1244)  
8
- 9 142. Kumar N, Bhartiya S, Singh T. Duration of anti-SARS-CoV-2 antibodies much shorter in India. *Vaccine*. 2021;39(6):886-888. doi:[10.1016/j.vaccine.2020.10.094](https://doi.org/10.1016/j.vaccine.2020.10.094)  
10
- 11 143. Mesnil M, Joubel K, Yavchitz A, Miklaszewski N, Devys J-M. Seroprevalence of SARS-Cov-2 in 646 professionals at the Rothschild Foundation Hospital  
12 (ProSeCoV study). *Anaesthesia Critical Care & Pain Medicine*. 2020;39(5):595-596. doi:[10.1016/j.accpm.2020.08.003](https://doi.org/10.1016/j.accpm.2020.08.003)  
13
- 14 144. Missaglia R, Belingheri M, Antolini L, et al. SARS-CoV-2 pandemia in Lombardy: The impact on family Paediatricians. *Italian Journal of Pediatrics*.  
15 2020;46(1):184. doi:[10.1186/s13052-020-00950-0](https://doi.org/10.1186/s13052-020-00950-0)  
16
- 17 145. Orth-Höller D, Eigentler A, Weseslindtner L, Möst J. Antibody kinetics in primary- and secondary-care physicians with mild to moderate SARS-CoV-2 infection.  
18 *Emerging Microbes & Infections*. 2020;9(1):1692-1694. doi:[10.1080/22221751.2020.1793690](https://doi.org/10.1080/22221751.2020.1793690)  
19
- 20 146. Plebani M, Padoan A, Fedeli U, et al. SARS-CoV-2 serosurvey in health care workers of the Veneto Region. *Clinical Chemistry and Laboratory Medicine (CCLM)*.  
21 2020;58(12):2107-2111. doi:[10.1515/cclm-2020-1236](https://doi.org/10.1515/cclm-2020-1236)  
22
- 23 147. Rudberg A-S, Havervall S, Månberg A, et al. SARS-CoV-2 exposure, symptoms and seroprevalence in healthcare workers in Sweden. *Nature Communications*.  
24 2020;11(1):5064. doi:[10.1038/s41467-020-18848-0](https://doi.org/10.1038/s41467-020-18848-0)  
25
- 26 148. Schmidt SB, Grüter L, Boltzmann M, Rollnik JD. Prevalence of serum IgG antibodies against SARS-CoV-2 among clinic staff. Adrish M, ed. *PLOS ONE*.  
27 2020;15(6):e0235417. doi:[10.1371/journal.pone.0235417](https://doi.org/10.1371/journal.pone.0235417)  
28
- 29 149. Sotgiu G, Barassi A, Miozzo M, et al. SARS-CoV-2 specific serological pattern in healthcare workers of an Italian COVID-19 forefront hospital. *BMC Pulmonary*  
30 *Medicine*. 2020;20(1):203. doi:[10.1186/s12890-020-01237-0](https://doi.org/10.1186/s12890-020-01237-0)  
31
- 32 150. Venugopal U, Jilani N, Rabah S, et al. SARS-CoV-2 seroprevalence among health care workers in a New York City hospital: A cross-sectional analysis during the  
33 COVID-19 pandemic. *International Journal of Infectious Diseases*. 2020;102:63-69. doi:[10.1016/j.ijid.2020.10.036](https://doi.org/10.1016/j.ijid.2020.10.036)  
34
- 35 151. Racine-Brzostek SE, Yang HS, Chadburn A, et al. COVID-19 Viral and Serology Testing in New York City Health Care Workers. *American Journal of Clinical*  
36 *Pathology*. 2020;154(5):592-595. doi:[10.1093/ajcp/aaqaa142](https://doi.org/10.1093/ajcp/aaqaa142)  
37
- 38 152. Hoffmann S, Spallek J, Heinz-Detlef G, Schiebel J, Hufert F. Testing the backbone of the healthcare system: A prospective serological-epidemiological cohort study  
39 of healthcare workers in rural Germany. Published online September 2020. doi:[10.21203/rs.3.rs-84703/v1](https://doi.org/10.21203/rs.3.rs-84703/v1)  
40
- 41 153. Patel MM, Thornburg NJ, Stubblefield WB, et al. Change in Antibodies to SARS-CoV-2 Over 60 Days Among Health Care Personnel in Nashville, Tennessee.  
42 *JAMA*. 2020;324(17):1781. doi:[10.1001/jama.2020.18796](https://doi.org/10.1001/jama.2020.18796)  
43  
44  
45  
46  
47

- 1  
2  
3 154. Self WH, Tenforde MW, Stubblefield WB, et al. Seroprevalence of SARS-CoV-2 Among Frontline Health Care Personnel in a Multistate Hospital Network 13  
4 Academic Medical Centers, April-June 2020. *MMWR Morbidity and Mortality Weekly Report*. 2020;69(35):1221-1226. doi:[10.15585/mmwr.mm6935e2](https://doi.org/10.15585/mmwr.mm6935e2)  
5
- 6 155. Shah VP, Hainy CM, Swift MD, Breeher LE, Theel ES, Sampathkumar P. Unrecognized severe acute respiratory coronavirus virus 2 (SARS-CoV-2) seroprevalence  
7 among healthcare personnel in a low-prevalence area. *Infection Control & Hospital Epidemiology*. Published online November 2020:1-3. doi:[10.1017/ice.2020.1341](https://doi.org/10.1017/ice.2020.1341)  
8
- 9 156. Bampoe S, Lucas DN, Neall G, et al. A cross-sectional study of immune seroconversion to SARS-CoV-2 in front-line maternity health professionals. *medRxiv*.  
10 Published online June 2020. doi:[10.1101/2020.06.24.20139352](https://doi.org/10.1101/2020.06.24.20139352)  
11
- 12 157. Dimcheff DE, Schildhouse RJ, Hausman MS, et al. Seroprevalence of severe acute respiratory syndrome coronavirus-2 (SARS-CoV-2) infection among Veterans  
13 Affairs healthcare system employees suggests higher risk of infection when exposed to SARS-CoV-2 outside the work environment. *Infection Control & Hospital  
14 Epidemiology*.:1-7. doi:[10.1017/ice.2020.1220](https://doi.org/10.1017/ice.2020.1220)  
15
- 16 158. Finkenzeller T, Faltlhauser A, Dietl K-H, et al. SARS-CoV-2-Antikörper bei Intensiv- und Klinikpersonal. *Medizinische Klinik - Intensivmedizin und Notfallmedizin*.  
17 2020;115(3):139-145. doi:[10.1007/s00063-020-00761-5](https://doi.org/10.1007/s00063-020-00761-5)  
18
- 19 159. Grant JJ, Wilmore SMS, McCann NS, et al. Seroprevalence of SARS-CoV-2 antibodies in healthcare workers at a London NHS Trust. *Infection Control & Hospital  
20 Epidemiology*. Published online August 2020:1-3. doi:[10.1017/ice.2020.402](https://doi.org/10.1017/ice.2020.402)  
21
- 22 160. Mansour M, Leven E, Muellers K, Stone K, Mendu DR, Wajnberg A. Prevalence of SARS-CoV-2 Antibodies Among Healthcare Workers at a Tertiary Academic  
23 Hospital in New York City. *Journal of General Internal Medicine*. 2020;35(8):2485-2486. doi:[10.1007/s11606-020-05926-8](https://doi.org/10.1007/s11606-020-05926-8)  
24
- 25 161. Martín V, Fernández-Villa T, Lamuedra Gil de Gomez M, et al. Prevalence of SARS-CoV-2 infection in general practitioners and nurses in primary care and nursing  
26 homes in the Healthcare Area of León and associated factors. *COVID19 en Atención Primaria*. 2020;46:35-39. doi:[10.1016/j.semerg.2020.05.014](https://doi.org/10.1016/j.semerg.2020.05.014)  
27
- 28 162. Meissner EG, Litwin C, Crocker T, Mack E, Card L. 460. Point-of-Care, In-Home SARS-CoV-2 IgG Antibody Testing to Assess Seroprevalence in At-Risk Health  
29 Care Workers. *Open Forum Infectious Diseases*. 2020;7(Supplement\_1):S297-S297. doi:[10.1093/ofid/ofaa439.653](https://doi.org/10.1093/ofid/ofaa439.653)  
30
- 31 163. Mostafa A, Kandil S, El-Sayed MH, et al. Universal COVID-19 screening of 4040 health care workers in a resource-limited setting: An Egyptian pilot model in a  
32 university with 12 public hospitals and medical centers. *International Journal of Epidemiology*. 2020;(dyaa173). doi:[10.1093/ije/dyaa173](https://doi.org/10.1093/ije/dyaa173)  
33
- 34 164. Paradiso AV, Summa simona D, Silvestris N, et al. COVID-19 SCREENING AND MONITORING OF ASYMPTOMATIC HEALTH WORKERS WITH A  
35 RAPID SEROLOGICAL TEST. *medRxiv*. Published online May 2020:2020.05.05.20086017. doi:[10.1101/2020.05.05.20086017](https://doi.org/10.1101/2020.05.05.20086017)  
36
- 37 165. Sydney ER, Kishore P, Laniado I, Rucker LM, Bajaj K, Zinaman MJ. Antibody evidence of SARS-CoV-2 infection in healthcare workers in the Bronx. *Infection  
38 Control & Hospital Epidemiology*. 2020;41(11):1348-1349. doi:[10.1017/ice.2020.437](https://doi.org/10.1017/ice.2020.437)  
39
- 40 166. Zhou F, Li J, Lu M, et al. Tracing asymptomatic SARS-CoV-2 carriers among 3674 hospital staff:A cross-sectional survey. *EClinicalMedicine*. 2020;26.  
41 doi:[10.1016/j.eclinm.2020.100510](https://doi.org/10.1016/j.eclinm.2020.100510)  
42
- 43 167. Buntinx F, Claes P, Gulikers M, et al. Added value of anti-SARS-CoV-2 antibody testing in a Flemish nursing home during an acute COVID-19 outbreak in April  
44 2020. *Acta Clinica Belgica*. 2020;0(0):1-6. doi:[10.1080/17843286.2020.1834285](https://doi.org/10.1080/17843286.2020.1834285)  
45  
46  
47



- 1  
2  
3 168. Reuben J, Sherman A, Ellison JA, et al. SARS-CoV-2 Seroprevalence among First Responders in the District of Columbia, May July 2020. *medRxiv*. Published  
4 online November 2020:2020.11.25.20225490. doi:[10.1101/2020.11.25.20225490](https://doi.org/10.1101/2020.11.25.20225490)  
5
- 6 169. Saberian P, Mireskandari SM, Baratloo A, et al. Antibody Rapid Test Results in Emergency Medical Services Personnel during COVID-19 Pandemic; a Cross  
7 Sectional study. *Archives of Academic Emergency Medicine*. 2020;9(1).
- 8  
9 170. Tarabichi Y, Watts B, Collins T, et al. SARS-CoV-2 Infection among Serially Tested Emergency Medical Services Workers. *Prehospital Emergency Care*.  
10 2020;0(0):1-7. doi:[10.1080/10903127.2020.1831668](https://doi.org/10.1080/10903127.2020.1831668)
- 11 171. Vijh R, Ghafari C, Hayden A, et al. Serological survey following SARS-COV-2 outbreaks at long-term care facilities in metro Vancouver, British Columbia:  
12 Implications for outbreak management and infection control policies. *American Journal of Infection Control*. Published online October 2020.  
13 doi:[10.1016/j.ajic.2020.10.009](https://doi.org/10.1016/j.ajic.2020.10.009)  
14
- 15 172. Bhattacharya D, Winnett A, Fulcher JA, et al. 70. Lack of SARS-CoV-2 Antibody Seroconversion After Prompt Identification and Cohorting of Sentinel sars-cov-2-  
16 positive Residents in a Skilled Nursing Facility. *Open Forum Infectious Diseases*. 2020;7(Supplement\_1):S165-S166. doi:[10.1093/ofid/ofaa439.380](https://doi.org/10.1093/ofid/ofaa439.380)  
17
- 18 173. Pérez-García F, Pérez-Zapata A, Arcos N, et al. Severe acute respiratory coronavirus virus 2 (SARS-CoV-2) infection among hospital workers in a severely affected  
19 institution in Madrid, Spain: A surveillance cross-sectional study. *Infection Control & Hospital Epidemiology*. Published online October 2020:1-7.  
20 doi:[10.1017/ice.2020.1303](https://doi.org/10.1017/ice.2020.1303)
- 21 174. Pérez-García F, Pérez-Zapata A, Arcos N, et al. Severe acute respiratory coronavirus virus 2 (SARS-CoV-2) infection among hospital workers in a severely affected  
22 institution in Madrid, Spain: A surveillance cross-sectional study. *Infection Control & Hospital Epidemiology*. 2021;42(7):803-809. doi:[10.1017/ice.2020.1303](https://doi.org/10.1017/ice.2020.1303)  
23
- 24 175. Mughal MS, Kaur IP, Patton CD, Mikhail NH, Vareechon C, Granet KM. The prevalence of severe acute respiratory coronavirus virus 2 (SARS-CoV-2) IgG  
25 antibodies in intensive care unit (ICU) healthcare personnel (HCP) and its implications a single-center, prospective, pilot study. *Infection Control & Hospital*  
26 *Epidemiology*. Published online June 2020:1-2. doi:[10.1017/ice.2020.298](https://doi.org/10.1017/ice.2020.298)  
27
- 28 176. Rao S. Covid-19: Jayadeva says its survey hints at herd immunity. *The Times of India*. Published online June 2020.
- 29  
30 177. Shukla V, Lau CSM, Towns M, et al. COVID-19 Exposure Among First Responders in Arizona. *Journal of Occupational and Environmental Medicine*.  
31 2020;62(12).
- 32  
33 178. Gray A. Prevalence Of COVID-19 Antibodies In Washoe Co. Expected To Be Low. *KUNR*. Published online June 2020.
- 34 179. Chughtai O, Batool H, Khan M, Chughtai A. Frequency of COVID-19 IgG Antibodies among Special Police Squad Lahore, Pakistan. *Journal of the College of*  
35 *Physicians and Surgeons Pakistan*. 2020;30(7):735-739. doi:[10.29271/jcpsp.2020.07.735](https://doi.org/10.29271/jcpsp.2020.07.735)  
36
- 37 180. Gujski M, Jankowski M, Pinkas J, et al. Prevalence of Current and Past SARS-CoV-2 Infections among Police Employees in Poland, JuneJuly 2020. *Journal of*  
38 *Clinical Medicine*. 2020;9(10):3245. doi:[10.3390/jcm9103245](https://doi.org/10.3390/jcm9103245)  
39
- 40 181. Jerónimo Langa. *Inquérito Sero-Epidemiológico de SARS-CoV-2 Na Cidade de Lichinga (InCOVID 2020)*. República de Moçambique Ministério da Saúde; 2020.  
41  
42  
43  
44  
45  
46  
47

- 1  
2  
3 182. Ivalda Macicame. *Inquérito Sero-Epidemiológico de SARS-CoV-2 Na Província de Maputo (InCOVID 2020)*. República de Moçambique Ministério da Saúde; 2020.  
4  
5 183. Al-Thani MH, Farag E, Bertollini R, et al. Seroprevalence of SARS-CoV-2 infection in the craft and manual worker population of Qatar. *medRxiv*. Published online  
6 November 2020:2020.11.24.20237719. doi:[10.1101/2020.11.24.20237719](https://doi.org/10.1101/2020.11.24.20237719)  
7  
8 184. Epstude J, Harsch IA. Seroprevalence of COVID-19 antibodies in the cleaning and oncological staff of a municipal clinic. *GMS Hygiene and Infection Control*;  
9 *15:Doc18*. Published online July 2020. doi:[10.3205/DGKH000353](https://doi.org/10.3205/DGKH000353)  
10  
11 185. Hassan SS, Seigerud Å, Mühr LSA, et al. SARS-CoV-2 infections among personnel providing home care services for the elderly in Stockholm, Sweden. *medRxiv*.  
12 Published online December 2020. doi:[10.1101/2020.12.18.20248511](https://doi.org/10.1101/2020.12.18.20248511)  
13  
14 186. Ladhani SN, Jeffery-Smith A, Patel M, et al. High prevalence of SARS-CoV-2 antibodies in care homes affected by COVID-19: Prospective cohort study, England.  
15 *EClinicalMedicine*. 2020;28. doi:[10.1016/j.eclinm.2020.100597](https://doi.org/10.1016/j.eclinm.2020.100597)  
16  
17 187. Lindahl JF, Hoffman T, Esmailzadeh M, et al. High seroprevalence of SARS-CoV-2 in elderly care employees in Sweden. *Infection Ecology & Epidemiology*.  
18 2020;10(1):1789036. doi:[10.1080/20008686.2020.1789036](https://doi.org/10.1080/20008686.2020.1789036)  
19  
20 188. Regan T. Fellowship Village Benefits from Covid-19 Antibody Tests. *Senior Housing News*. Published online June 2020.  
21  
22 189. Alali WQ, Bastaki H, Longenecker JC, et al. Seroprevalence of SARS-CoV-2 in migrant workers in Kuwait. *Journal of Travel Medicine*. 2020;(taaa223).  
23 doi:[10.1093/jtm/taaa223](https://doi.org/10.1093/jtm/taaa223)  
24  
25 190. Addetia A, Crawford KHD, Dingens A, et al. Neutralizing Antibodies Correlate with Protection from SARS-CoV-2 in Humans during a Fishery Vessel Outbreak  
26 with a High Attack Rate. McAdam AJ, ed. *Journal of Clinical Microbiology*. 2020;58(11):e02107-20, /jcm/58/11/JCM.02107-20.atom. doi:[10.1128/JCM.02107-20](https://doi.org/10.1128/JCM.02107-20)  
27  
28 191. Picon RV, Carreno I, da Silva AA, et al. Coronavirus disease 2019 population-based prevalence, risk factors, hospitalization, and fatality rates in southern Brazil.  
29 *International Journal of Infectious Diseases*. 2020;100:402-410. doi:[10.1016/j.ijid.2020.09.028](https://doi.org/10.1016/j.ijid.2020.09.028)  
30  
31 192. D B, L B, P T, Pa P, A B, U L. Effectiveness of the measures aimed at containing Sars-cov-2 virus spreading in work settings: A survey in companies based in the  
32 Veneto region of Italy. *La Medicina del lavoro*. Published online October 2020. doi:[10.23749/mdl.v11i1i5.10037](https://doi.org/10.23749/mdl.v11i1i5.10037)  
33  
34 193. Xu X, Sun J, Nie S, et al. Seroprevalence of immunoglobulin M and G antibodies against SARS-CoV-2 in China. *Nature Medicine*. 2020;26(8):1193-1195.  
35 doi:[10.1038/s41591-020-0949-6](https://doi.org/10.1038/s41591-020-0949-6)  
36  
37 194. Chamie G, Marquez C, Crawford E, et al. Community Transmission of Severe Acute Respiratory Syndrome Coronavirus 2 Disproportionately Affects the Latinx  
38 Population During Shelter-in-Place in San Francisco. *Clinical Infectious Diseases*. Published online August 2020:ciaa1234. doi:[10.1093/cid/ciaa1234](https://doi.org/10.1093/cid/ciaa1234)  
39  
40 195. McLaughlin C, Doll MK, Morrison KT, et al. High Community SARS-CoV-2 Antibody Seroprevalence in a Ski Resort Community, Blaine County, Idaho, US.  
41 Preliminary Results. *medRxiv*. Published online July 2020. doi:[10.1101/2020.07.19.20157198](https://doi.org/10.1101/2020.07.19.20157198)  
42  
43 196. Muñoz L, Pífano M, Bolzán A, et al. *Surveillance and Seroprevalence: Evaluation of IgG Antibodies for SARS-Cov2 by ELISA in the Popular Neighborhood Villa*  
44 *Azul, Quilmes, Province of Buenos Aires, Argentina.*; 2020. doi:[10.1590/SciELOPreprints.1147](https://doi.org/10.1590/SciELOPreprints.1147)  
45  
46  
47
