# Supplementary material for: Occupation and SARS-CoV-2 seroprevalence studies: a systematic review
Source: PubMed Central journal article supplement (PMC9979591; doi:10.1136/bmjopen-2022-063771), 2023-02-28
Supplement: bmjopen-2022-063771supp002.pdf [file bmjopen-2022-063771supp002.pdf]

**Supplementary File I.** List of all estimates, included studies and references

| <b>SOC 2010 Major Group</b> | <b>Study</b>                       | <b>N</b> | <b>SOC 2010 Occupation Title</b> | <b>Study Type</b>                                                                 | <b>Study Dates</b> | <b>Country</b>           | <b>Serum positive prevalence (95% CIs)</b> | <b>Overall Risk of Bias (JBI)</b> |
|-----------------------------|------------------------------------|----------|----------------------------------|-----------------------------------------------------------------------------------|--------------------|--------------------------|--------------------------------------------|-----------------------------------|
| Not employed (mixed)*       | Merkely et al., 2020 <sup>1</sup>  | n=209    | Homemaker (Unpaid)               | Cross-sectional survey                                                            | 05/01 - 05/16      | Hungary                  | 0.73% (0-1.74%)                            | Moderate                          |
| Not employed (mixed)*       | Siddiqui et al., 2020 <sup>2</sup> | n=37     | Homemaker (Unpaid)               | Prospective cohort                                                                | 04/15 - 08/15      | India                    | 18.9%                                      | High                              |
| Not employed (mixed)*       | Biggs et al., 2020 <sup>3</sup>    | n=157    | Retired (Unpaid)                 | Cross-sectional survey                                                            | 04/28 - 05/03      | United States of America | 1.91%                                      | Moderate                          |
| Not employed (mixed)*       | Carrat et al., 2020 <sup>4</sup>   | n=5381   | Retired (Unpaid)                 | Prospective cohort                                                                | 05/04 - 06/23      | France                   | 4.3% (3.5-5%)                              | Moderate                          |
| Not employed (mixed)*       | Merkely et al., 2020 <sup>1</sup>  | n=2767   | Retired (Unpaid)                 | Cross-sectional survey                                                            | 05/01 - 05/16      | Hungary                  | 1.09% (0.66-1.52%)                         | Moderate                          |
| Not employed (mixed)*       | Richard et al., 2020 <sup>5</sup>  | n=1635   | Retired (Unpaid)                 | Cross-sectional survey                                                            | 04/06 - 06/30      | Switzerland              | 4.3%                                       | Low                               |
| Not employed (mixed)*       | Siddiqui et al., 2020 <sup>2</sup> | n=10     | Retired (Unpaid)                 | Prospective cohort                                                                | 04/15 - 08/15      | India                    | 20%                                        | High                              |
| Not employed (mixed)*       | Alemu et al., 2020 <sup>6</sup>    | n=32     | Student (Unpaid)                 | Cross-sectional survey                                                            | 04/23 - 04/28      | Ethiopia                 | 15.6%                                      | Moderate                          |
| Not employed (mixed)*       | Biggs et al., 2020 <sup>3</sup>    | n=16     | Student (Unpaid)                 | Cross-sectional survey                                                            | 04/28 - 05/03      | United States of America | 12.5%                                      | Moderate                          |
| Not employed (mixed)*       | Brehm et al., 2020 <sup>7</sup>    | n=73     | Student (Unpaid)                 | Cross sectional study with prospective cohort follow up of a subset of the sample | 03/20 - 07/17      | Germany                  | 2.7%                                       | Moderate                          |
| Not employed (mixed)*       | Carrat et al., 2020 <sup>4</sup>   | n=81     | Student (Unpaid)                 | Prospective cohort                                                                | 05/04 - 06/23      | France                   | 7.2% (0.1-12.6%)                           | Moderate                          |

|                                  |                                        |        |                                                    |                        |               |                            |                    |          |
|----------------------------------|----------------------------------------|--------|----------------------------------------------------|------------------------|---------------|----------------------------|--------------------|----------|
| Not employed (mixed)*            | Iversen et al., 2020 <sup>8</sup>      | n=688  | Student (Unpaid)                                   | Cross-sectional survey | 04/15 - 04/22 | Denmark                    | 14.97%             | Low      |
| Not employed (mixed)*            | Lumley et al., 2020 <sup>9</sup>       | n=620  | Student (Unpaid)                                   | Prospective cohort     | 04/23 - 11/30 | The United Kingdom         | 6.77%              | Moderate |
| Not employed (mixed)*            | Merkely et al., 2020 <sup>1</sup>      | n=774  | Student (Unpaid)                                   | Cross-sectional survey | 05/01 - 05/16 | Hungary                    | 0.69% (0-1.49%)    | Moderate |
| Not employed (mixed)*            | Richard et al., 2020 <sup>5</sup>      | n=666  | Student (Unpaid)                                   | Cross-sectional survey | 04/06 - 06/30 | Switzerland                | 10.5%              | Low      |
| Not employed (mixed)*            | Shakiba et al., 2020 <sup>10</sup>     | n=114  | Student (Unpaid)                                   | Cross-sectional survey | 04/11 - 04/19 | Iran (Islamic Republic of) | 17.5% (11.3-23.7%) | Moderate |
| Not employed (mixed)*            | Siddiqui et al., 2020 <sup>2</sup>     | n=14   | Student (Unpaid)                                   | Prospective cohort     | 04/15 - 08/15 | India                      | 21.4%              | High     |
| Not employed (mixed)*            | Tilley et al., 2020 <sup>11</sup>      | n=790  | Student (Unpaid)                                   | Cross-sectional survey | 04/29 - 05/08 | United States of America   | 4% (3-5.1%)        | Moderate |
| Not employed (mixed)*            | Tsitsilonis et al., 2020 <sup>12</sup> | n=1395 | Student (Unpaid)                                   | Cross-sectional survey | 06/15 - 07/15 | Greece                     | 0.42% (0.03-1.5%)  | Moderate |
| Not employed (mixed)*            | Arnaldo et al., 2020 <sup>13</sup>     | n=513  | Military, Rank Not Specified                       | Cross-sectional survey | 07/06 - 07/13 | Mozambique                 | 3.7%               | High     |
| Not employed (mixed)*            | Arnaldo et al., 2020 <sup>14</sup>     | n=116  | Military, Rank Not Specified                       | Cross-sectional survey | 11/02 - 11/12 | Mozambique                 | 1.7%               | High     |
| Not employed (mixed)*            | Mabunda et al., 2020 <sup>15</sup>     | n=324  | Military, Rank Not Specified                       | Cross-sectional survey | 09/21 - 10/02 | Mozambique                 | 2.8%               | High     |
| Not employed (mixed)*            | Mahomed et al., 2020 <sup>16</sup>     | n=116  | Military, Rank Not Specified                       | Cross-sectional survey | 11/26 - 12/03 | Mozambique                 | 18.1%              | High     |
| Not employed (mixed)*            | Payne et al., 2020 <sup>17</sup>       | n=382  | Military, Rank Not Specified                       | Cross-sectional survey | 04/20 - 04/24 | United States of America   | 59.7%              | High     |
| Not employed (mixed)*            | World et al., 2020 <sup>18</sup>       | n=6900 | Military, Rank Not Specified                       | Cross-sectional survey | 08/15 - 10/15 | Republic of Korea          | 0.36%              | Unclear  |
| Management Occupations (11-0000) | Shakiba et al., 2020 <sup>10</sup>     | n=16   | Farmers, Ranchers, and Other Agricultural Managers | Cross-sectional survey | 04/11 - 04/19 | Iran (Islamic Republic of) | 19.7% (9.1-31%)    | Moderate |
| Management Occupations (11-      | Favara et al., 2020 <sup>19</sup>      | n=43   | Medical and Health Services Managers               | Cross-sectional survey | 07/13 - 07/13 | The United Kingdom         | 9.3%               | High     |

|                                                         |                                     |        |                                      |                                                                                   |               |                            |                    |          |
|---------------------------------------------------------|-------------------------------------|--------|--------------------------------------|-----------------------------------------------------------------------------------|---------------|----------------------------|--------------------|----------|
| 0000)                                                   |                                     |        |                                      |                                                                                   |               |                            |                    |          |
| Management Occupations (11-0000)                        | Galan et al., 2020 <sup>20</sup>    | n=170  | Medical and Health Services Managers | Cross-sectional survey                                                            | 04/14 - 04/27 | Spain                      | 27.6%              | High     |
| Management Occupations (11-0000)                        | Hunter et al., 2020 <sup>21</sup>   | n=44   | Medical and Health Services Managers | Cross-sectional survey                                                            | 04/29 - 05/08 | United States of America   | 4.55%              | High     |
| Management Occupations (11-0000)                        | Leidner et al., 2020 <sup>22</sup>  | n=257  | Medical and Health Services Managers | Cross sectional study with prospective cohort follow up of a subset of the sample | 04/08 - 05/22 | United States of America   | 3.11%              | High     |
| Management Occupations (11-0000)                        | Martin et al., 2020 <sup>23</sup>   | n=2078 | Medical and Health Services Managers | Cross-sectional survey                                                            | 05/29 - 07/13 | The United Kingdom         | 6.79%              | Moderate |
| Management Occupations (11-0000)                        | Siddiqui et al., 2020 <sup>2</sup>  | n=15   | Medical and Health Services Managers | Prospective cohort                                                                | 04/15 - 08/15 | India                      | 20%                | High     |
| Management Occupations (11-0000)                        | Baracco et al., 2020 <sup>24</sup>  | n=45   | Managers, All Other                  | Cross-sectional survey                                                            | 04/23 - 05/05 | Italy                      | 6.67%              | High     |
| Management Occupations (11-0000)                        | Goenka et al., 2020 <sup>25</sup>   | n=71   | Managers, All Other                  | Cross-sectional survey                                                            | 07/12 - 08/23 | India                      | 7.04%              | Moderate |
| Management Occupations (11-0000)                        | Goenka et al., 2020 <sup>26</sup>   | n=13   | Managers, All Other                  | Cross-sectional survey                                                            | 08/01 - 08/31 | India                      | 38.46%             | High     |
| Business and Financial Operations Occupations (13-0000) | Satpati et al., 2020 <sup>27</sup>  | n=43   | Management Analysts                  | Cross-sectional survey                                                            | 07/26 - 08/08 | India                      | 2.33%              | Moderate |
| Business and Financial                                  | Poustchi et al., 2020 <sup>28</sup> | n=880  | Financial Specialists                | Cross-sectional survey                                                            | 04/17 - 06/02 | Iran (Islamic Republic of) | 14.2% (12.1-16.5%) | Moderate |

|                                                          |                                    |        |                                            |                                                                                   |               |                          |       |          |
|----------------------------------------------------------|------------------------------------|--------|--------------------------------------------|-----------------------------------------------------------------------------------|---------------|--------------------------|-------|----------|
| Operations Occupations (13-0000)                         |                                    |        |                                            |                                                                                   |               |                          |       |          |
| Computer and Mathematical Occupations (15-0000)          | Biggs et al., 2020 <sup>3</sup>    | n=47   | Computer User Support Specialists          | Cross-sectional survey                                                            | 04/28 - 05/03 | United States of America | 0%    | Moderate |
| Architecture and Engineering Occupations (17-0000)       | Siddiqui et al., 2020 <sup>2</sup> | n=21   | Engineers                                  | Prospective cohort                                                                | 04/15 - 08/15 | India                    | 42.9% | High     |
| Life, Physical, and Social Science Occupations (19-0000) | Jones et al., 2020 <sup>29</sup>   | n=245  | Medical Scientists                         | Cross-sectional survey                                                            | 01/15 - 06/15 | The United Kingdom       | 1.9%  | High     |
| Life, Physical, and Social Science Occupations (19-0000) | Anna et al., 2020 <sup>30</sup>    | n=505  | Medical Scientists, Except Epidemiologists | Prospective cohort                                                                | 04/28 - 07/31 | France                   | 8.71% | Moderate |
| Life, Physical, and Social Science Occupations (19-0000) | Erber et al., 2020 <sup>31</sup>   | n=635  | Medical Scientists, Except Epidemiologists | Cross-sectional survey                                                            | 04/14 - 05/29 | Germany                  | 1.24% | High     |
| Life, Physical, and Social Science Occupations (19-0000) | Favara et al., 2020 <sup>19</sup>  | n=38   | Medical Scientists, Except Epidemiologists | Cross-sectional survey                                                            | 07/13 - 07/13 | The United Kingdom       | 2.6%  | High     |
| Life, Physical, and Social Science Occupations (19-0000) | Hanrath et al., 2020 <sup>32</sup> | n=468  | Medical Scientists, Except Epidemiologists | Cross-sectional survey                                                            | 05/29 - 07/06 | The United Kingdom       | 6.2%  | High     |
| Life, Physical, and Social Science Occupations (19-0000) | Leidner et al., 2020 <sup>22</sup> | n=2654 | Medical Scientists, Except Epidemiologists | Cross sectional study with prospective cohort follow up of a subset of the sample | 04/08 - 05/22 | United States of America | 2.22% | High     |

|                                                          |                                        |        |                                            |                                                                                   |               |                          |                 |          |
|----------------------------------------------------------|----------------------------------------|--------|--------------------------------------------|-----------------------------------------------------------------------------------|---------------|--------------------------|-----------------|----------|
| Life, Physical, and Social Science Occupations (19-0000) | Martin et al., 2020 <sup>23</sup>      | n=1154 | Medical Scientists, Except Epidemiologists | Cross-sectional survey                                                            | 05/29 - 07/13 | The United Kingdom       | 9.71%           | Moderate |
| Life, Physical, and Social Science Occupations (19-0000) | Rosser et al., 2020 <sup>33</sup>      | n=102  | Medical Scientists, Except Epidemiologists | Cross-sectional survey                                                            | 04/20 - 05/20 | United States of America | 0.98%           | High     |
| Life, Physical, and Social Science Occupations (19-0000) | Silva et al., 2020 <sup>34</sup>       | n=69   | Chemists                                   | Cross-sectional survey                                                            | 06/05 - 07/31 | Brazil                   | 4%              | High     |
| Life, Physical, and Social Science Occupations (19-0000) | Tsitsilonis et al., 2020 <sup>12</sup> | n=250  | Physical Scientists, All Other             | Cross-sectional survey                                                            | 06/15 - 07/15 | Greece                   | 1.42% (0-7.24%) | Moderate |
| Community and Social Service Occupations (21-0000)       | Jones et al., 2020 <sup>29</sup>       | n=211  | Healthcare Social Workers                  | Cross-sectional survey                                                            | 01/15 - 06/15 | The United Kingdom       | 6.3%            | High     |
| Community and Social Service Occupations (21-0000)       | Leidner et al., 2020 <sup>22</sup>     | n=235  | Social Workers, All Other                  | Cross sectional study with prospective cohort follow up of a subset of the sample | 04/08 - 05/22 | United States of America | 3.4%            | High     |
| Community and Social Service Occupations (21-0000)       | Rosser et al., 2020 <sup>33</sup>      | n=117  | Social Workers, All Other                  | Cross-sectional survey                                                            | 04/20 - 05/20 | United States of America | 1.71%           | High     |
| Community and Social Service Occupations (21-0000)       | Sabourin et al., 2020 <sup>35</sup>    | n=91   | Social Workers, All Other                  | Cross-sectional survey                                                            | 07/15 - 08/15 | United States of America | 5.49%           | High     |
| Community and Social Service                             | Yogo et al., 2020 <sup>36</sup>        | n=35   | Social Workers, All Other                  | Cross-sectional survey                                                            | 05/20 - 06/08 | United States of America | 0%              | High     |

|                                                        |                                        |        |                                       |                        |               |                          |                    |          |
|--------------------------------------------------------|----------------------------------------|--------|---------------------------------------|------------------------|---------------|--------------------------|--------------------|----------|
| Occupations (21-0000)                                  |                                        |        |                                       |                        |               |                          |                    |          |
| Community and Social Service Occupations (21-0000)     | Biggs et al., 2020 <sup>3</sup>        | n=6    | Religious Workers                     | Cross-sectional survey | 04/28 - 05/03 | United States of America | 16.67%             | Moderate |
| Education, Training, and Library Occupations (25-0000) | Campos et al., 2020 <sup>37</sup>      | n=2715 | Postsecondary Teachers                | Cross-sectional survey | 05/13 - 07/10 | Portugal                 | 2.6%               | High     |
| Education, Training, and Library Occupations (25-0000) | Goncalves et al., 2020 <sup>38</sup>   | n=1636 | Postsecondary Teachers                | Cross-sectional survey | 06/15 - 06/30 | Portugal                 | 3.05%              | Moderate |
| Education, Training, and Library Occupations (25-0000) | Tsitsilonis et al., 2020 <sup>12</sup> | n=312  | Postsecondary Teachers                | Cross-sectional survey | 06/15 - 07/15 | Greece                   | 1.2% (0.14-3.7%)   | Moderate |
| Education, Training, and Library Occupations (25-0000) | Fontanet et al., 2020 <sup>39</sup>    | n=42   | Elementary and Middle School Teachers | Retrospective cohort   | 04/28 - 04/30 | France                   | 7.1%               | Moderate |
| Education, Training, and Library Occupations (25-0000) | Siddiqui et al., 2020 <sup>2</sup>     | n=8    | Elementary and Middle School Teachers | Prospective cohort     | 04/15 - 08/15 | India                    | 25%                | High     |
| Education, Training, and Library Occupations (25-0000) | Torres et al., 2020 <sup>40</sup>      | n=165  | Elementary and Middle School Teachers | Cross-sectional survey | 05/04 - 05/19 | Chile                    | 20.6% (14.7-27.6%) | High     |

|                                                                      |                                     |        |                                                               |                        |               |                          |                    |          |
|----------------------------------------------------------------------|-------------------------------------|--------|---------------------------------------------------------------|------------------------|---------------|--------------------------|--------------------|----------|
| Arts, Design, Entertainment, Sports, and Media Occupations (27-0000) | Halatoko et al., 2020 <sup>41</sup> | n=55   | Fine Artists, Including Painters, Sculptors, and Illustrators | Cross-sectional survey | 04/23 - 05/08 | Togo                     | 0%                 | High     |
| Arts, Design, Entertainment, Sports, and Media Occupations (27-0000) | Slusser et al., 2020 <sup>42</sup>  | n=5603 | Athletes, Coaches, Umpires, and Related Workers               | Cross-sectional survey | 04/08 - 04/21 | United States of America | 0.7% (0.28-1.15%)  | Unclear  |
| Arts, Design, Entertainment, Sports, and Media Occupations (27-0000) | Vince et al., 2020 <sup>43</sup>    | n=272  | Athletes, Coaches, Umpires, and Related Workers               | Prospective cohort     | 05/29 - 07/31 | Croatia                  | 14%                | Moderate |
| Arts, Design, Entertainment, Sports, and Media Occupations (27-0000) | Vince et al., 2020 <sup>43</sup>    | n=43   | Coaches and Scouts                                            | Prospective cohort     | 05/29 - 07/31 | Croatia                  | 16.3%              | Moderate |
| Arts, Design, Entertainment, Sports, and Media Occupations (27-0000) | Mack et al., 2020 <sup>44</sup>     | n=1007 | Umpires, Referees, and Other Sports Officials                 | Prospective cohort     | 06/16 - 06/30 | Germany                  | 2.09% (1.37-3.17%) | High     |
| Arts, Design, Entertainment, Sports, and Media Occupations (27-0000) | Khan et al., 2020 <sup>45</sup>     | n=44   | Media and Communication Workers                               | Cross-sectional survey | 07/01 - 07/15 | India                    | 0%                 | Moderate |
| Healthcare Practitioners and Technical Occupations (29-0000)         | Akinbami et al., 2020 <sup>46</sup> | n=566  | Healthcare Practitioners and Technical Occupations            | Cross-sectional survey | 05/18 - 06/13 | United States of America | 4.6% (3-6.7%)      | Moderate |

|                                                              |                                     |       |                                                                                        |                                                                                   |               |                          |               |          |
|--------------------------------------------------------------|-------------------------------------|-------|----------------------------------------------------------------------------------------|-----------------------------------------------------------------------------------|---------------|--------------------------|---------------|----------|
| Healthcare Practitioners and Technical Occupations (29-0000) | Khan et al., 2020 <sup>45</sup>     | n=355 | Healthcare Practitioners and Technical Occupations                                     | Cross-sectional survey                                                            | 07/01 - 07/15 | India                    | 4.8% (3-7.6%) | Moderate |
| Healthcare Practitioners and Technical Occupations (29-0000) | Leidner et al., 2020 <sup>22</sup>  | n=402 | Healthcare Practitioners and Technical Occupations                                     | Cross sectional study with prospective cohort follow up of a subset of the sample | 04/08 - 05/22 | United States of America | 1.49%         | High     |
| Healthcare Occupations (mixed)*                              | Hanrath et al., 2020 <sup>32</sup>  | n=102 | Healthcare Practitioners and Technical Occupations and Healthcare Support Occupations* | Cross-sectional survey                                                            | 05/29 - 07/06 | The United Kingdom       | 6.62%         | High     |
| Healthcare Occupations (mixed)*                              | Jones et al., 2020 <sup>29</sup>    | n=413 | Healthcare Practitioners and Technical Occupations and Healthcare Support Occupations* | Cross-sectional survey                                                            | 01/15 - 06/15 | The United Kingdom       | 7.8%          | High     |
| Healthcare Occupations (mixed)*                              | Martin et al., 2020 <sup>23</sup>   | n=550 | Healthcare Practitioners and Technical Occupations and Healthcare Support Occupations* | Cross-sectional survey                                                            | 05/29 - 07/13 | The United Kingdom       | 10.36%        | Moderate |
| Healthcare Occupations (mixed)*                              | Amendola et al., 2020 <sup>47</sup> | n=117 | Healthcare Practitioners and Technical Occupations and Healthcare Support Occupations* | Cross-sectional survey                                                            | 04/15 - 04/15 | Italy                    | 4.27%         | High     |
| Healthcare Occupations (mixed)*                              | Arnaldo et al., 2020 <sup>48</sup>  | n=543 | Healthcare Practitioners and Technical Occupations and Healthcare Support Occupations* | Cross-sectional survey                                                            | 08/10 - 08/21 | Mozambique               | 3.7%          | High     |



|                                 |                                     |       |                                                                                        |                        |               |                          |        |          |
|---------------------------------|-------------------------------------|-------|----------------------------------------------------------------------------------------|------------------------|---------------|--------------------------|--------|----------|
| Healthcare Occupations (mixed)* | Bal et al., 2020 <sup>49</sup>      | n=190 | Healthcare Practitioners and Technical Occupations and Healthcare Support Occupations* | Cross-sectional survey | 04/10 - 05/28 | France                   | 3.68%  | High     |
| Healthcare Occupations (mixed)* | Barallat et al., 2020 <sup>50</sup> | n=429 | Healthcare Practitioners and Technical Occupations and Healthcare Support Occupations* | Cross-sectional survey | 05/04 - 05/22 | Spain                    | 7.69%  | High     |
| Healthcare Occupations (mixed)* | Bardai et al., 2020 <sup>51</sup>   | n=35  | Healthcare Practitioners and Technical Occupations and Healthcare Support Occupations* | Cross-sectional survey | 06/10 - 07/27 | Canada                   | 11%    | High     |
| Healthcare Occupations (mixed)* | Bardai et al., 2020 <sup>51</sup>   | n=20  | Healthcare Practitioners and Technical Occupations and Healthcare Support Occupations* | Cross-sectional survey | 06/10 - 07/27 | Canada                   | 15%    | High     |
| Healthcare Occupations (mixed)* | Bardai et al., 2020 <sup>51</sup>   | n=44  | Healthcare Practitioners and Technical Occupations and Healthcare Support Occupations* | Cross-sectional survey | 06/10 - 07/27 | Canada                   | 11%    | High     |
| Healthcare Occupations (mixed)* | Bardai et al., 2020 <sup>51</sup>   | n=99  | Healthcare Practitioners and Technical Occupations and Healthcare Support Occupations* | Cross-sectional survey | 06/10 - 07/27 | Canada                   | 12%    | High     |
| Healthcare Occupations (mixed)* | Biggs et al., 2020 <sup>3</sup>     | n=59  | Healthcare Practitioners and Technical Occupations and Healthcare Support Occupations* | Cross-sectional survey | 04/28 - 05/03 | United States of America | 10.17% | Moderate |

|                                 |                                    |         |                                                                                        |                        |               |                          |                   |          |
|---------------------------------|------------------------------------|---------|----------------------------------------------------------------------------------------|------------------------|---------------|--------------------------|-------------------|----------|
| Healthcare Occupations (mixed)* | Blairon et al., 2020 <sup>52</sup> | n=588   | Healthcare Practitioners and Technical Occupations and Healthcare Support Occupations* | Cross-sectional survey | 05/25 - 06/19 | Belgium                  | 19.2%             | High     |
| Healthcare Occupations (mixed)* | Borraz et al., 2020 <sup>53</sup>  | n=289   | Healthcare Practitioners and Technical Occupations and Healthcare Support Occupations* | Prospective cohort     | 03/20 - 04/21 | Spain                    | 5.88%             | High     |
| Healthcare Occupations (mixed)* | Brunner et al., 2020 <sup>54</sup> | n=762   | Healthcare Practitioners and Technical Occupations and Healthcare Support Occupations* | Cross-sectional survey | 05/04 - 05/29 | United States of America | 4.5%              | High     |
| Healthcare Occupations (mixed)* | Brunner et al., 2020 <sup>54</sup> | n=764   | Healthcare Practitioners and Technical Occupations and Healthcare Support Occupations* | Cross-sectional survey | 05/04 - 05/29 | United States of America | 2%                | High     |
| Healthcare Occupations (mixed)* | Carozzi et al., 2020 <sup>55</sup> | n=17098 | Healthcare Practitioners and Technical Occupations and Healthcare Support Occupations* | Cross-sectional survey | 04/01 - 04/30 | Italy                    | 3.1%              | High     |
| Healthcare Occupations (mixed)* | Carrat et al., 2020 <sup>4</sup>   | n=568   | Healthcare Practitioners and Technical Occupations and Healthcare Support Occupations* | Prospective cohort     | 05/04 - 06/23 | France                   | 11.6% (8.3-14.4%) | Moderate |
| Healthcare Occupations (mixed)* | Cavlek et al., 2020 <sup>56</sup>  | n=558   | Healthcare Practitioners and Technical Occupations and Healthcare Support Occupations* | Cross-sectional survey | 04/25 - 05/24 | Croatia                  | 1.25%             | High     |

|                                 |                                     |        |                                                                                        |                        |               |                          |                   |          |
|---------------------------------|-------------------------------------|--------|----------------------------------------------------------------------------------------|------------------------|---------------|--------------------------|-------------------|----------|
| Healthcare Occupations (mixed)* | Chibwana et al., 2020 <sup>57</sup> | n=500  | Healthcare Practitioners and Technical Occupations and Healthcare Support Occupations* | Prospective cohort     | 05/22 - 06/19 | Malawi                   | 12.3% (8.2-16.5%) | High     |
| Healthcare Occupations (mixed)* | Coffman et al., 2020 <sup>58</sup>  | n=1100 | Healthcare Practitioners and Technical Occupations and Healthcare Support Occupations* | Cross-sectional survey | 07/01 - 07/31 | United States of America | 2.2%              | Unclear  |
| Healthcare Occupations (mixed)* | Cooper et al., 2020 <sup>59</sup>   | n=118  | Healthcare Practitioners and Technical Occupations and Healthcare Support Occupations* | Cross-sectional survey | 06/10 - 08/07 | The United Kingdom       | 8.47%             | Moderate |
| Healthcare Occupations (mixed)* | Cooper et al., 2020 <sup>59</sup>   | n=27   | Healthcare Practitioners and Technical Occupations and Healthcare Support Occupations* | Cross-sectional survey | 06/10 - 08/07 | The United Kingdom       | 14.81%            | Moderate |
| Healthcare Occupations (mixed)* | Cooper et al., 2020 <sup>59</sup>   | n=24   | Healthcare Practitioners and Technical Occupations and Healthcare Support Occupations* | Cross-sectional survey | 06/10 - 08/07 | The United Kingdom       | 12.5%             | Moderate |
| Healthcare Occupations (mixed)* | Cooper et al., 2020 <sup>59</sup>   | n=1068 | Healthcare Practitioners and Technical Occupations and Healthcare Support Occupations* | Cross-sectional survey | 06/10 - 08/07 | The United Kingdom       | 5.43%             | Moderate |
| Healthcare Occupations (mixed)* | Cooper et al., 2020 <sup>59</sup>   | n=174  | Healthcare Practitioners and Technical Occupations and Healthcare Support Occupations* | Cross-sectional survey | 06/10 - 08/07 | The United Kingdom       | 5.75%             | Moderate |

|                                 |                                      |        |                                                                                        |                        |               |                    |                  |          |
|---------------------------------|--------------------------------------|--------|----------------------------------------------------------------------------------------|------------------------|---------------|--------------------|------------------|----------|
| Healthcare Occupations (mixed)* | Cooper et al., 2020 <sup>59</sup>    | n=319  | Healthcare Practitioners and Technical Occupations and Healthcare Support Occupations* | Cross-sectional survey | 06/10 - 08/07 | The United Kingdom | 11.29%           | Moderate |
| Healthcare Occupations (mixed)* | Cooper et al., 2020 <sup>59</sup>    | n=5698 | Healthcare Practitioners and Technical Occupations and Healthcare Support Occupations* | Cross-sectional survey | 06/10 - 08/07 | The United Kingdom | 7.2%             | Moderate |
| Healthcare Occupations (mixed)* | Cooper et al., 2020 <sup>59</sup>    | n=412  | Healthcare Practitioners and Technical Occupations and Healthcare Support Occupations* | Cross-sectional survey | 06/10 - 08/07 | The United Kingdom | 4.61%            | Moderate |
| Healthcare Occupations (mixed)* | Denyer et al., 2020 <sup>60</sup>    | n=5850 | Healthcare Practitioners and Technical Occupations and Healthcare Support Occupations* | Cross-sectional survey | 05/12 - 05/18 | Japan              | 1.79%            | Unclear  |
| Healthcare Occupations (mixed)* | Dimeglio et al., 2020 <sup>61</sup>  | n=8758 | Healthcare Practitioners and Technical Occupations and Healthcare Support Occupations* | Cross-sectional survey | 06/10 - 07/10 | France             | 3.2% (2.8-3.5%)  | High     |
| Healthcare Occupations (mixed)* | Erber et al., 2020 <sup>31</sup>     | n=603  | Healthcare Practitioners and Technical Occupations and Healthcare Support Occupations* | Cross-sectional survey | 04/14 - 05/29 | Germany            | 2.8%             | High     |
| Healthcare Occupations (mixed)* | Fuereeder et al., 2020 <sup>62</sup> | n=62   | Healthcare Practitioners and Technical Occupations and Healthcare Support Occupations* | Retrospective cohort   | 04/01 - 06/04 | Austria            | 3.2% (0.4-11.2%) | High     |

|                                 |                                     |        |                                                                                        |                                |               |                          |                    |          |
|---------------------------------|-------------------------------------|--------|----------------------------------------------------------------------------------------|--------------------------------|---------------|--------------------------|--------------------|----------|
| Healthcare Occupations (mixed)* | Fusco et al., 2020 <sup>63</sup>    | n=115  | Healthcare Practitioners and Technical Occupations and Healthcare Support Occupations* | Cross-sectional survey         | 03/23 - 04/02 | Italy                    | 1.74%              | High     |
| Healthcare Occupations (mixed)* | Geraci et al., 2020 <sup>64</sup>   | n=230  | Healthcare Practitioners and Technical Occupations and Healthcare Support Occupations* | Cross-sectional survey         | 03/16 - 05/20 | United States of America | 2.17%              | High     |
| Healthcare Occupations (mixed)* | Gudo et al., 2020 <sup>65</sup>     | n=1427 | Healthcare Practitioners and Technical Occupations and Healthcare Support Occupations* | Cross-sectional survey         | 06/17 - 06/30 | Mozambique               | 7% (6-9%)          | High     |
| Healthcare Occupations (mixed)* | Hackner et al., 2020 <sup>66</sup>  | n=130  | Healthcare Practitioners and Technical Occupations and Healthcare Support Occupations* | Cross-sectional survey         | 04/01 - 04/30 | Austria                  | 2.3%               | High     |
| Healthcare Occupations (mixed)* | Halatoko et al., 2020 <sup>41</sup> | n=370  | Healthcare Practitioners and Technical Occupations and Healthcare Support Occupations* | Cross-sectional survey         | 04/23 - 05/08 | Togo                     | 1.4%               | High     |
| Healthcare Occupations (mixed)* | Haq et al., 2020 <sup>67</sup>      | n=76   | Healthcare Practitioners and Technical Occupations and Healthcare Support Occupations* | Cross-sectional survey         | 06/15 - 06/29 | Pakistan                 | 35.5% (24.8-47.3%) | Moderate |
| Healthcare Occupations (mixed)* | He et al., 2020 <sup>68</sup>       | n=1059 | Healthcare Practitioners and Technical Occupations and Healthcare Support Occupations* | Repeated cross sectional study | 05/13 - 06/10 | China                    | 9.3%               | High     |

|                                 |                                      |         |                                                                                        |                                |               |                          |                    |          |
|---------------------------------|--------------------------------------|---------|----------------------------------------------------------------------------------------|--------------------------------|---------------|--------------------------|--------------------|----------|
| Healthcare Occupations (mixed)* | Herzberg et al., 2020 <sup>69</sup>  | n=871   | Healthcare Practitioners and Technical Occupations and Healthcare Support Occupations* | Prospective cohort             | 04/14 - 06/16 | Germany                  | 2.64%              | High     |
| Healthcare Occupations (mixed)* | Jeremias et al., 2020 <sup>70</sup>  | n=100   | Healthcare Practitioners and Technical Occupations and Healthcare Support Occupations* | Cross-sectional survey         | 03/01 - 04/30 | United States of America | 12%                | High     |
| Healthcare Occupations (mixed)* | Jespersen et al., 2020 <sup>71</sup> | n=17948 | Healthcare Practitioners and Technical Occupations and Healthcare Support Occupations* | Cross-sectional survey         | 05/18 - 06/19 | Denmark                  | 3.36% (2.38-3.82%) | Moderate |
| Healthcare Occupations (mixed)* | Kassem et al., 2020 <sup>72</sup>    | n=74    | Healthcare Practitioners and Technical Occupations and Healthcare Support Occupations* | Cross-sectional survey         | 06/01 - 06/14 | Egypt                    | 12.2%              | High     |
| Healthcare Occupations (mixed)* | Kern et al., 2020 <sup>73</sup>      | n=1316  | Healthcare Practitioners and Technical Occupations and Healthcare Support Occupations* | Cross-sectional survey         | 04/09 - 04/16 | Germany                  | 1.06% (0.58-1.78%) | High     |
| Healthcare Occupations (mixed)* | Khalil et al., 2020 <sup>74</sup>    | n=190   | Healthcare Practitioners and Technical Occupations and Healthcare Support Occupations* | Cross-sectional survey         | 05/15 - 05/28 | The United Kingdom       | 22%                | High     |
| Healthcare Occupations (mixed)* | Kumar et al., 2020 <sup>75</sup>     | n=635   | Healthcare Practitioners and Technical Occupations and Healthcare Support Occupations* | Repeated cross sectional study | 07/11 - 07/24 | India                    | 0%                 | High     |

|                                 |                                       |        |                                                                                        |                        |               |            |                 |          |
|---------------------------------|---------------------------------------|--------|----------------------------------------------------------------------------------------|------------------------|---------------|------------|-----------------|----------|
| Healthcare Occupations (mixed)* | Lackermair et al., 2020 <sup>76</sup> | n=151  | Healthcare Practitioners and Technical Occupations and Healthcare Support Occupations* | Cross-sectional survey | 04/02 - 04/06 | Germany    | 2.6% (0.8-7.1%) | High     |
| Healthcare Occupations (mixed)* | Lahner et al., 2020 <sup>77</sup>     | n=1084 | Healthcare Practitioners and Technical Occupations and Healthcare Support Occupations* | Cross-sectional survey | 04/07 - 04/27 | Italy      | 0.7%            | High     |
| Healthcare Occupations (mixed)* | Liu et al., 2020 <sup>78</sup>        | n=116  | Healthcare Practitioners and Technical Occupations and Healthcare Support Occupations* | Cross-sectional survey | 02/07 - 04/21 | China      | 0%              | High     |
| Healthcare Occupations (mixed)* | Liu et al., 2020 <sup>78</sup>        | n=304  | Healthcare Practitioners and Technical Occupations and Healthcare Support Occupations* | Cross-sectional survey | 02/07 - 04/21 | China      | 0%              | High     |
| Healthcare Occupations (mixed)* | Liu et al., 2020 <sup>79</sup>        | n=3832 | Healthcare Practitioners and Technical Occupations and Healthcare Support Occupations* | Cross-sectional survey | 02/29 - 04/29 | China      | 4% (3.4-4.7%)   | Moderate |
| Healthcare Occupations (mixed)* | Lorenzo et al., 2020 <sup>80</sup>    | n=38   | Healthcare Practitioners and Technical Occupations and Healthcare Support Occupations* | Cross-sectional survey | 05/02 - 05/31 | Italy      | 5.3%            | High     |
| Healthcare Occupations (mixed)* | Mahomed et al., 2020 <sup>81</sup>    | n=569  | Healthcare Practitioners and Technical Occupations and Healthcare Support Occupations* | Cross-sectional survey | 08/31 - 10/12 | Mozambique | 0.7%            | High     |

|                                 |                                         |        |                                                                                        |                        |               |                    |                |          |
|---------------------------------|-----------------------------------------|--------|----------------------------------------------------------------------------------------|------------------------|---------------|--------------------|----------------|----------|
| Healthcare Occupations (mixed)* | Mahumane et al., 2020 <sup>82</sup>     | n=380  | Healthcare Practitioners and Technical Occupations and Healthcare Support Occupations* | Cross-sectional survey | 11/02 - 11/17 | Mozambique         | 1.3%           | High     |
| Healthcare Occupations (mixed)* | Majdoubi et al., 2020 <sup>83</sup>     | n=276  | Healthcare Practitioners and Technical Occupations and Healthcare Support Occupations* | Cross-sectional survey | 05/17 - 06/19 | Canada             | 0.6% (0-2.71%) | High     |
| Healthcare Occupations (mixed)* | Majiya et al., 2020 <sup>84</sup>       | n=185  | Healthcare Practitioners and Technical Occupations and Healthcare Support Occupations* | Cross-sectional survey | 06/26 - 06/30 | Nigeria            | 25.41%         | Moderate |
| Healthcare Occupations (mixed)* | Majiya et al., 2020 <sup>84</sup>       | n=43   | Healthcare Practitioners and Technical Occupations and Healthcare Support Occupations* | Cross-sectional survey | 06/26 - 06/30 | Nigeria            | 37.21%         | Moderate |
| Healthcare Occupations (mixed)* | Malferteiner et al., 2020 <sup>85</sup> | n=139  | Healthcare Practitioners and Technical Occupations and Healthcare Support Occupations* | Prospective cohort     | 03/15 - 06/07 | Germany            | 0%             | High     |
| Healthcare Occupations (mixed)* | Martin et al., 2020 <sup>86</sup>       | n=326  | Healthcare Practitioners and Technical Occupations and Healthcare Support Occupations* | Cross-sectional survey | 04/15 - 05/18 | Belgium            | 11%            | High     |
| Healthcare Occupations (mixed)* | Martin et al., 2020 <sup>23</sup>       | n=4631 | Healthcare Practitioners and Technical Occupations and Healthcare Support Occupations* | Cross-sectional survey | 05/29 - 07/13 | The United Kingdom | 13.65%         | Moderate |



|                                 |                                      |        |                                                                                        |                        |               |                          |                   |          |
|---------------------------------|--------------------------------------|--------|----------------------------------------------------------------------------------------|------------------------|---------------|--------------------------|-------------------|----------|
| Healthcare Occupations (mixed)* | Melo et al., 2020 <sup>87</sup>      | n=471  | Healthcare Practitioners and Technical Occupations and Healthcare Support Occupations* | Cross-sectional survey | 06/01 - 06/30 | Brazil                   | 13.59%            | High     |
| Healthcare Occupations (mixed)* | Morcuende et al., 2020 <sup>88</sup> | n=6    | Healthcare Practitioners and Technical Occupations and Healthcare Support Occupations* | Cross-sectional survey | 03/01 - 04/21 | United States of America | 0%                | High     |
| Healthcare Occupations (mixed)* | Moscola et al., 2020 <sup>89</sup>   | n=8156 | Healthcare Practitioners and Technical Occupations and Healthcare Support Occupations* | Cross-sectional survey | 04/20 - 06/23 | United States of America | 11.6%             | High     |
| Healthcare Occupations (mixed)* | Nishida et al., 2020 <sup>90</sup>   | n=49   | Healthcare Practitioners and Technical Occupations and Healthcare Support Occupations* | Cross-sectional survey | 06/12 - 06/19 | Japan                    | 0%                | Moderate |
| Healthcare Occupations (mixed)* | Olalla et al., 2020 <sup>91</sup>    | n=498  | Healthcare Practitioners and Technical Occupations and Healthcare Support Occupations* | Cross-sectional survey | 04/15 - 04/25 | Spain                    | 2.2%              | High     |
| Healthcare Occupations (mixed)* | Pallett et al., 2020 <sup>92</sup>   | n=504  | Healthcare Practitioners and Technical Occupations and Healthcare Support Occupations* | Prospective cohort     | 04/08 - 06/12 | The United Kingdom       | 10.6% (7.6-13.6%) | High     |
| Healthcare Occupations (mixed)* | Pere et al., 2020 <sup>93</sup>      | n=3569 | Healthcare Practitioners and Technical Occupations and Healthcare Support Occupations* | Cross-sectional survey | 05/02 - 06/26 | France                   | 11.9%             | High     |

|                                 |                                       |        |                                                                                        |                        |               |                            |                    |          |
|---------------------------------|---------------------------------------|--------|----------------------------------------------------------------------------------------|------------------------|---------------|----------------------------|--------------------|----------|
| Healthcare Occupations (mixed)* | Poulikakos et al., 2020 <sup>94</sup> | n=281  | Healthcare Practitioners and Technical Occupations and Healthcare Support Occupations* | Cross-sectional survey | 05/04 - 05/06 | The United Kingdom         | 6%                 | High     |
| Healthcare Occupations (mixed)* | Psichogiou et al., 2020 <sup>95</sup> | n=1495 | Healthcare Practitioners and Technical Occupations and Healthcare Support Occupations* | Cross-sectional survey | 04/13 - 05/15 | Greece                     | 1.26% (0.43-3.26%) | Moderate |
| Healthcare Occupations (mixed)* | Satpati et al., 2020 <sup>27</sup>    | n=18   | Healthcare Practitioners and Technical Occupations and Healthcare Support Occupations* | Cross-sectional survey | 07/26 - 08/08 | India                      | 5.56%              | Moderate |
| Healthcare Occupations (mixed)* | Seetharam et al., 2020 <sup>96</sup>  | n=728  | Healthcare Practitioners and Technical Occupations and Healthcare Support Occupations* | Cross-sectional survey | 08/16 - 08/29 | India                      | 27.3% (24.1-30.6%) | Unclear  |
| Healthcare Occupations (mixed)* | Shakiba et al., 2020 <sup>10</sup>    | n=43   | Healthcare Practitioners and Technical Occupations and Healthcare Support Occupations* | Cross-sectional survey | 04/11 - 04/19 | Iran (Islamic Republic of) | 14.5% (4.5-25%)    | Moderate |
| Healthcare Occupations (mixed)* | Shields et al., 2020 <sup>97</sup>    | n=516  | Healthcare Practitioners and Technical Occupations and Healthcare Support Occupations* | Cross-sectional survey | 04/24 - 04/25 | The United Kingdom         | 24.4%              | High     |
| Healthcare Occupations (mixed)* | Silva et al., 2020 <sup>98</sup>      | n=61   | Healthcare Practitioners and Technical Occupations and Healthcare Support Occupations* | Cross-sectional survey | 04/09 - 04/29 | Brazil                     | 4.91%              | High     |

|                                 |                                        |         |                                                                                        |                        |               |                          |                 |         |
|---------------------------------|----------------------------------------|---------|----------------------------------------------------------------------------------------|------------------------|---------------|--------------------------|-----------------|---------|
| Healthcare Occupations (mixed)* | Solodky et al., 2020 <sup>99</sup>     | n=85    | Healthcare Practitioners and Technical Occupations and Healthcare Support Occupations* | Cross-sectional survey | 03/01 - 04/16 | France                   | 5.88%           | High    |
| Healthcare Occupations (mixed)* | Soriano et al., 2020 <sup>100</sup>    | n=108   | Healthcare Practitioners and Technical Occupations and Healthcare Support Occupations* | Retrospective cohort   | 04/26 - 05/16 | Spain                    | 13%             | High    |
| Healthcare Occupations (mixed)* | Statistica et al., 2020 <sup>101</sup> | n=64660 | Healthcare Practitioners and Technical Occupations and Healthcare Support Occupations* | Cross-sectional survey | 05/25 - 07/15 | Italy                    | 2.5%            | Unclear |
| Healthcare Occupations (mixed)* | Steensels et al., 2020 <sup>102</sup>  | n=3056  | Healthcare Practitioners and Technical Occupations and Healthcare Support Occupations* | Cross-sectional survey | 04/22 - 04/30 | Belgium                  | 6.4% (5.5-7.3%) | High    |
| Healthcare Occupations (mixed)* | Stock et al., 2020 <sup>103</sup>      | n=98    | Healthcare Practitioners and Technical Occupations and Healthcare Support Occupations* | Cross-sectional survey | 04/04 - 04/20 | United States of America | 15.3%           | High    |
| Healthcare Occupations (mixed)* | Takita et al., 2020 <sup>104</sup>     | n=175   | Healthcare Practitioners and Technical Occupations and Healthcare Support Occupations* | Cross-sectional survey | 04/20 - 05/20 | Japan                    | 4% (1.62-8.07%) | High    |
| Healthcare Occupations (mixed)* | Tong et al., 2020 <sup>105</sup>       | n=191   | Healthcare Practitioners and Technical Occupations and Healthcare Support Occupations* | Cross-sectional survey | 05/12 - 05/15 | China                    | 0%              | High    |

|                                 |                                                |        |                                                                                        |                                                                                   |               |            |        |      |
|---------------------------------|------------------------------------------------|--------|----------------------------------------------------------------------------------------|-----------------------------------------------------------------------------------|---------------|------------|--------|------|
| Healthcare Occupations (mixed)* | Trieu et al., 2020 <sup>106</sup>              | n=607  | Healthcare Practitioners and Technical Occupations and Healthcare Support Occupations* | Prospective cohort                                                                | 03/06 - 04/09 | Norway     | 5.27%  | High |
| Healthcare Occupations (mixed)* | Tu et al., 2020 <sup>107</sup>                 | n=325  | Healthcare Practitioners and Technical Occupations and Healthcare Support Occupations* | Cross sectional study with prospective cohort follow up of a subset of the sample | 03/19 - 03/20 | China      | 43.08% | High |
| Healthcare Occupations (mixed)* | Valdivia et al., 2020 <sup>108</sup>           | n=1153 | Healthcare Practitioners and Technical Occupations and Healthcare Support Occupations* | Cross-sectional survey                                                            | 04/13 - 04/30 | Spain      | 3.5%   | High |
| Healthcare Occupations (mixed)* | Vasquez et al., 2020 <sup>109</sup>            | n=1147 | Healthcare Practitioners and Technical Occupations and Healthcare Support Occupations* | Cross-sectional survey                                                            | 05/19 - 06/06 | Peru       | 58.3%  | High |
| Healthcare Occupations (mixed)* | Viegas et al., 2020 <sup>110</sup>             | n=1443 | Healthcare Practitioners and Technical Occupations and Healthcare Support Occupations* | Cross-sectional survey                                                            | 08/03 - 08/21 | Mozambique | 2.63%  | High |
| Healthcare Occupations (mixed)* | Vlachoyiannopoulou et al., 2020 <sup>111</sup> | n=321  | Healthcare Practitioners and Technical Occupations and Healthcare Support Occupations* | Cross-sectional survey                                                            | 04/25 - 05/10 | Greece     | 2.18%  | High |
| Healthcare Occupations (mixed)* | Volta et al., 2020 <sup>112</sup>              | n=76   | Healthcare Practitioners and Technical Occupations and Healthcare Support Occupations* | Cross-sectional survey                                                            | 04/27 - 04/27 | Italy      | 11.8%  | High |

|                                 |                                      |        |                                                                                                                |                        |               |                          |        |          |
|---------------------------------|--------------------------------------|--------|----------------------------------------------------------------------------------------------------------------|------------------------|---------------|--------------------------|--------|----------|
| Healthcare Occupations (mixed)* | Ward et al., 2020 <sup>113</sup>     | n=5416 | Healthcare Practitioners and Technical Occupations and Healthcare Support Occupations*                         | Cross-sectional survey | 09/15 - 09/28 | The United Kingdom       | 10.67% | Moderate |
| Healthcare Occupations (mixed)* | Ward et al., 2020 <sup>113</sup>     | n=1692 | Healthcare Practitioners and Technical Occupations and Healthcare Support Occupations*                         | Cross-sectional survey | 09/15 - 09/28 | The United Kingdom       | 6.68%  | Moderate |
| Healthcare Occupations (mixed)* | Xiong et al., 2020 <sup>114</sup>    | n=797  | Healthcare Practitioners and Technical Occupations and Healthcare Support Occupations*                         | Cross-sectional survey | 02/12 - 03/17 | China                    | 4.39%  | Unclear  |
| Healthcare Occupations (mixed)* | Zhang et al., 2020 <sup>115</sup>    | n=63   | Healthcare Practitioners and Technical Occupations and Healthcare Support Occupations*                         | Cross-sectional survey | 01/21 - 02/16 | China                    | 0%     | High     |
| Healthcare Occupations (mixed)* | Zhao et al., 2020 <sup>116</sup>     | n=1060 | Healthcare Practitioners and Technical Occupations and Healthcare Support Occupations*                         | Cross-sectional survey | 01/14 - 02/21 | China                    | 8.3%   | High     |
| First responders (mixed)*       | Ahmad et al., 2020 <sup>117</sup>    | n=40   | Healthcare Practitioners and Technical Occupations and Protective Service Occupations (i.e. first responders)* | Cross-sectional survey | 04/21 - 05/22 | United States of America | 20%    | High     |
| First responders (mixed)*       | Halbrook et al., 2020 <sup>118</sup> | n=679  | Healthcare Practitioners and Technical Occupations and Protective Service Occupations (i.e. first responders)* | Cross-sectional survey | 05/19 - 08/31 | United States of America | 8.1%   | Moderate |

|                                                              |                                         |       |                                                                                                                |                        |               |                          |                    |          |
|--------------------------------------------------------------|-----------------------------------------|-------|----------------------------------------------------------------------------------------------------------------|------------------------|---------------|--------------------------|--------------------|----------|
| First responders (mixed)*                                    | Iwuji et al., 2020 <sup>119</sup>       | n=683 | Healthcare Practitioners and Technical Occupations and Protective Service Occupations (i.e. first responders)* | Cross-sectional survey | 05/12 - 05/13 | United States of America | 0.7%               | High     |
| First responders (mixed)*                                    | Magyar et al., 2020 <sup>120</sup>      | n=70  | Healthcare Practitioners and Technical Occupations and Protective Service Occupations (i.e. first responders)* | Cross-sectional survey | 05/01 - 05/14 | United States of America | 4.29%              | High     |
| First responders (mixed)*                                    | Martinez et al., 2020 <sup>121</sup>    | n=79  | Healthcare Practitioners and Technical Occupations and Protective Service Occupations (i.e. first responders)* | Cross-sectional survey | 04/16 - 04/17 | United States of America | 5.06%              | High     |
| First responders (mixed)*                                    | Staletovich et al., 2020 <sup>122</sup> | n=359 | Healthcare Practitioners and Technical Occupations and Protective Service Occupations (i.e. first responders)* | Cross-sectional survey | 05/17 - 05/22 | United States of America | 0%                 | Unclear  |
| Healthcare Practitioners and Technical Occupations (29-0000) | Hibino et al., 2020 <sup>123</sup>      | n=806 | Health Diagnosing and Treating Practitioners                                                                   | Cross-sectional survey | 06/01 - 07/30 | Japan                    | 0.74% (0.27-1.61%) | Unclear  |
| Healthcare Practitioners and Technical Occupations (29-0000) | Jones et al., 2020 <sup>29</sup>        | n=856 | Dentists, General                                                                                              | Cross-sectional survey | 01/15 - 06/15 | The United Kingdom       | 7.9%               | High     |
| Life, Physical, and Social Science                           | Calcagno et al., 2020 <sup>124</sup>    | n=343 | Life, Physical, and Social Science Occupations                                                                 | Cross-sectional survey | 04/17 - 05/20 | Italy                    | 6.71%              | Moderate |

|                                                              |                                      |       |                              |                        |               |                          |                 |          |
|--------------------------------------------------------------|--------------------------------------|-------|------------------------------|------------------------|---------------|--------------------------|-----------------|----------|
| Occupations (19-0000)                                        |                                      |       |                              |                        |               |                          |                 |          |
| Healthcare Practitioners and Technical Occupations (29-0000) | Goenka et al., 2020 <sup>25</sup>    | n=49  | Dietitians and Nutritionists | Cross-sectional survey | 07/12 - 08/23 | India                    | 18.37%          | Moderate |
| Healthcare Practitioners and Technical Occupations (29-0000) | Goenka et al., 2020 <sup>26</sup>    | n=6   | Dietitians and Nutritionists | Cross-sectional survey | 08/01 - 08/31 | India                    | 0%              | High     |
| Healthcare Practitioners and Technical Occupations (29-0000) | Akinbami et al., 2020 <sup>46</sup>  | n=321 | Pharmacists                  | Cross-sectional survey | 05/18 - 06/13 | United States of America | 4.4% (2.4-7.2%) | Moderate |
| Healthcare Practitioners and Technical Occupations (29-0000) | Alharbi et al., 2020 <sup>125</sup>  | n=5   | Pharmacists                  | Cross-sectional survey | 04/18 - 06/17 | Saudi Arabia             | 0%              | High     |
| Healthcare Practitioners and Technical Occupations (29-0000) | Calcagno et al., 2020 <sup>124</sup> | n=29  | Pharmacists                  | Cross-sectional survey | 04/17 - 05/20 | Italy                    | 3.45%           | Moderate |
| Healthcare Practitioners and Technical Occupations (29-0000) | Chau et al., 2020 <sup>126</sup>     | n=17  | Pharmacists                  | Cross-sectional survey | 08/23 - 08/30 | Viet Nam                 | 0%              | High     |
| Healthcare Practitioners and Technical Occupations (29-0000) | Hanrath et al., 2020 <sup>32</sup>   | n=189 | Pharmacists                  | Cross-sectional survey | 05/29 - 07/06 | The United Kingdom       | 4.76%           | High     |

|                                                              |                                    |       |                         |                        |               |                          |                 |          |
|--------------------------------------------------------------|------------------------------------|-------|-------------------------|------------------------|---------------|--------------------------|-----------------|----------|
| Healthcare Practitioners and Technical Occupations (29-0000) | Khan et al., 2020 <sup>127</sup>   | n=109 | Pharmacists             | Cross-sectional survey | 06/15 - 06/29 | India                    | 0%              | Moderate |
| Healthcare Practitioners and Technical Occupations (29-0000) | Mahomed et al., 2020 <sup>81</sup> | n=404 | Pharmacists             | Cross-sectional survey | 08/31 - 10/12 | Mozambique               | 0.5%            | High     |
| Healthcare Practitioners and Technical Occupations (29-0000) | Martin et al., 2020 <sup>23</sup>  | n=113 | Pharmacists             | Cross-sectional survey | 05/29 - 07/13 | The United Kingdom       | 0%              | Moderate |
| Healthcare Practitioners and Technical Occupations (29-0000) | Rosser et al., 2020 <sup>33</sup>  | n=213 | Pharmacists             | Cross-sectional survey | 04/20 - 05/20 | United States of America | 1.88%           | High     |
| Healthcare Practitioners and Technical Occupations (29-0000) | Costa et al., 2020 <sup>128</sup>  | n=652 | Physicians and Surgeons | Cross-sectional survey | 05/14 - 05/28 | Brazil                   | 5.8%            | Moderate |
| Healthcare Practitioners and Technical Occupations (29-0000) | Mohr et al., 2020 <sup>129</sup>   | n=372 | Physicians and Surgeons | Cross-sectional survey | 05/13 - 07/08 | United States of America | 1.61%           | Moderate |
| Healthcare Practitioners and Technical Occupations (29-0000) | Nishida et al., 2020 <sup>90</sup> | n=63  | Physicians and Surgeons | Cross-sectional survey | 06/12 - 06/19 | Japan                    | 3.2% (0.88-11%) | Moderate |
| Healthcare Practitioners and                                 | Noor et al., 2020 <sup>130</sup>   | n=157 | Physicians and Surgeons | Cross-sectional survey | 07/13 - 07/15 | Pakistan                 | 17.83%          | Moderate |



|                                                              |                                      |        |                                    |                                                                                   |               |                          |                 |          |
|--------------------------------------------------------------|--------------------------------------|--------|------------------------------------|-----------------------------------------------------------------------------------|---------------|--------------------------|-----------------|----------|
| Technical Occupations (29-0000)                              |                                      |        |                                    |                                                                                   |               |                          |                 |          |
| Healthcare Practitioners and Technical Occupations (29-0000) | Singhal et al., 2020 <sup>131</sup>  | n=208  | Physicians and Surgeons            | Cross-sectional survey                                                            | 06/01 - 06/30 | India                    | 12.5%           | High     |
| Healthcare Practitioners and Technical Occupations (29-0000) | Morcuende et al., 2020 <sup>88</sup> | n=23   | Anesthesiologists                  | Cross-sectional survey                                                            | 03/01 - 04/21 | United States of America | 13.04%          | High     |
| Healthcare Practitioners and Technical Occupations (29-0000) | Morcuende et al., 2020 <sup>88</sup> | n=3    | Obstetricians and Gynecologists    | Cross-sectional survey                                                            | 03/01 - 04/21 | United States of America | 100%            | High     |
| Healthcare Practitioners and Technical Occupations (29-0000) | Urbieto et al., 2020 <sup>132</sup>  | n=23   | Pediatricians, General             | Cross-sectional survey                                                            | 04/14 - 04/16 | Spain                    | 4.3%            | High     |
| Healthcare Practitioners and Technical Occupations (29-0000) | Iversen et al., 2020 <sup>8</sup>    | n=1944 | Psychiatrists                      | Cross-sectional survey                                                            | 04/15 - 04/22 | Denmark                  | 1.85%           | Low      |
| Healthcare Practitioners and Technical Occupations (29-0000) | Leidner et al., 2020 <sup>22</sup>   | n=301  | Surgeons                           | Cross sectional study with prospective cohort follow up of a subset of the sample | 04/08 - 05/22 | United States of America | 2.66%           | High     |
| Healthcare Practitioners and Technical                       | Akinbami et al., 2020 <sup>46</sup>  | n=2297 | Physicians and Surgeons, All Other | Cross-sectional survey                                                            | 05/18 - 06/13 | United States of America | 6.1% (5.1-7.1%) | Moderate |

|                                                              |                                     |        |                                    |                                                              |               |              |        |          |
|--------------------------------------------------------------|-------------------------------------|--------|------------------------------------|--------------------------------------------------------------|---------------|--------------|--------|----------|
| Occupations (29-0000)                                        |                                     |        |                                    |                                                              |               |              |        |          |
| Healthcare Practitioners and Technical Occupations (29-0000) | Alharbi et al., 2020 <sup>125</sup> | n=18   | Physicians and Surgeons, All Other | Cross-sectional survey                                       | 04/18 - 06/17 | Saudi Arabia | 27.78% | High     |
| Healthcare Practitioners and Technical Occupations (29-0000) | Amendola et al., 2020 <sup>47</sup> | n=214  | Physicians and Surgeons, All Other | Cross-sectional survey                                       | 04/15 - 04/15 | Italy        | 4.67%  | High     |
| Healthcare Practitioners and Technical Occupations (29-0000) | Baracco et al., 2020 <sup>24</sup>  | n=417  | Physicians and Surgeons, All Other | Cross-sectional survey                                       | 04/23 - 05/05 | Italy        | 17%    | High     |
| Healthcare Practitioners and Technical Occupations (29-0000) | Barallat et al., 2020 <sup>50</sup> | n=1821 | Physicians and Surgeons, All Other | Cross-sectional survey                                       | 05/04 - 05/22 | Spain        | 11.81% | High     |
| Healthcare Practitioners and Technical Occupations (29-0000) | Bianchi et al., 2020 <sup>133</sup> | n=34   | Physicians and Surgeons, All Other | Cross-sectional survey                                       | 04/15 - 05/15 | Italy        | 5.88%  | Unclear  |
| Healthcare Practitioners and Technical Occupations (29-0000) | Blairon et al., 2020 <sup>52</sup>  | n=323  | Physicians and Surgeons, All Other | Cross-sectional survey                                       | 05/25 - 06/19 | Belgium      | 11.8%  | High     |
| Healthcare Practitioners and Technical Occupations (29-0000) | Brehm et al., 2020 <sup>7</sup>     | n=275  | Physicians and Surgeons, All Other | Cross sectional study with prospective cohort follow up of a | 03/20 - 07/17 | Germany      | 3.3%   | Moderate |

|                                                              |                                       |       |                                    |                        |               |                    |        |          |
|--------------------------------------------------------------|---------------------------------------|-------|------------------------------------|------------------------|---------------|--------------------|--------|----------|
|                                                              |                                       |       |                                    | subset of the sample   |               |                    |        |          |
| Healthcare Practitioners and Technical Occupations (29-0000) | Brousseau et al., 2020 <sup>134</sup> | n=432 | Physicians and Surgeons, All Other | Cross-sectional survey | 07/06 - 09/24 | Canada             | 7.2%   | High     |
| Healthcare Practitioners and Technical Occupations (29-0000) | Calcagno et al., 2020 <sup>124</sup>  | n=700 | Physicians and Surgeons, All Other | Cross-sectional survey | 04/17 - 05/20 | Italy              | 7.86%  | Moderate |
| Healthcare Practitioners and Technical Occupations (29-0000) | Chau et al., 2020 <sup>126</sup>      | n=64  | Physicians and Surgeons, All Other | Cross-sectional survey | 08/23 - 08/30 | Viet Nam           | 0%     | High     |
| Healthcare Practitioners and Technical Occupations (29-0000) | Chen et al., 2020 <sup>135</sup>      | n=17  | Physicians and Surgeons, All Other | Cross-sectional survey | 02/19 - 02/19 | China              | 41.18% | High     |
| Healthcare Practitioners and Technical Occupations (29-0000) | Erber et al., 2020 <sup>31</sup>      | n=860 | Physicians and Surgeons, All Other | Cross-sectional survey | 04/14 - 05/29 | Germany            | 1.63%  | High     |
| Healthcare Practitioners and Technical Occupations (29-0000) | Favara et al., 2020 <sup>136</sup>    | n=15  | Physicians and Surgeons, All Other | Prospective cohort     | 06/01 - 06/07 | The United Kingdom | 13.33% | High     |
| Healthcare Practitioners and Technical Occupations (29-0000) | Favara et al., 2020 <sup>19</sup>     | n=82  | Physicians and Surgeons, All Other | Cross-sectional survey | 07/13 - 07/13 | The United Kingdom | 10.9%  | High     |

|                                                              |                                      |       |                                    |                        |               |                          |        |          |
|--------------------------------------------------------------|--------------------------------------|-------|------------------------------------|------------------------|---------------|--------------------------|--------|----------|
| Healthcare Practitioners and Technical Occupations (29-0000) | Fujita et al., 2020 <sup>137</sup>   | n=42  | Physicians and Surgeons, All Other | Cross-sectional survey | 04/10 - 04/20 | Japan                    | 4.7%   | High     |
| Healthcare Practitioners and Technical Occupations (29-0000) | Galan et al., 2020 <sup>20</sup>     | n=564 | Physicians and Surgeons, All Other | Cross-sectional survey | 04/14 - 04/27 | Spain                    | 39.36% | High     |
| Healthcare Practitioners and Technical Occupations (29-0000) | Godbout et al., 2020 <sup>138</sup>  | n=490 | Physicians and Surgeons, All Other | Cross-sectional survey | 07/27 - 10/02 | United States of America | 1.43%  | High     |
| Healthcare Practitioners and Technical Occupations (29-0000) | Goenka et al., 2020 <sup>25</sup>    | n=255 | Physicians and Surgeons, All Other | Cross-sectional survey | 07/12 - 08/23 | India                    | 3.92%  | Moderate |
| Healthcare Practitioners and Technical Occupations (29-0000) | Goenka et al., 2020 <sup>26</sup>    | n=29  | Physicians and Surgeons, All Other | Cross-sectional survey | 08/01 - 08/31 | India                    | 20.69% | High     |
| Healthcare Practitioners and Technical Occupations (29-0000) | Hanrath et al., 2020 <sup>32</sup>   | n=899 | Physicians and Surgeons, All Other | Cross-sectional survey | 05/29 - 07/06 | The United Kingdom       | 7.01%  | High     |
| Healthcare Practitioners and Technical Occupations (29-0000) | Houlihan et al., 2020 <sup>139</sup> | n=72  | Physicians and Surgeons, All Other | Cross-sectional survey | 03/26 - 04/08 | The United Kingdom       | 22%    | High     |
| Healthcare Practitioners and                                 | Hunter et al., 2020 <sup>21</sup>    | n=279 | Physicians and Surgeons, All Other | Cross-sectional survey | 04/29 - 05/08 | United States of America | 1.08%  | High     |

|                                                              |                                     |        |                                    |                        |               |                          |                 |      |
|--------------------------------------------------------------|-------------------------------------|--------|------------------------------------|------------------------|---------------|--------------------------|-----------------|------|
| Technical Occupations (29-0000)                              |                                     |        |                                    |                        |               |                          |                 |      |
| Healthcare Practitioners and Technical Occupations (29-0000) | Insua et al., 2020 <sup>140</sup>   | n=116  | Physicians and Surgeons, All Other | Cross-sectional survey | 06/08 - 06/09 | Argentina                | 0.9% (0.1-5.5%) | High |
| Healthcare Practitioners and Technical Occupations (29-0000) | Iversen et al., 2020 <sup>8</sup>   | n=4698 | Physicians and Surgeons, All Other | Cross-sectional survey | 04/15 - 04/22 | Denmark                  | 4.07%           | Low  |
| Healthcare Practitioners and Technical Occupations (29-0000) | Iversen et al., 2020 <sup>8</sup>   | n=113  | Physicians and Surgeons, All Other | Cross-sectional survey | 04/15 - 04/22 | Denmark                  | 7.08%           | Low  |
| Healthcare Practitioners and Technical Occupations (29-0000) | Jeremias et al., 2020 <sup>70</sup> | n=79   | Physicians and Surgeons, All Other | Cross-sectional survey | 03/01 - 04/30 | United States of America | 11.4%           | High |
| Healthcare Practitioners and Technical Occupations (29-0000) | Kassem et al., 2020 <sup>72</sup>   | n=30   | Physicians and Surgeons, All Other | Cross-sectional survey | 06/01 - 06/14 | Egypt                    | 6.66%           | High |
| Healthcare Practitioners and Technical Occupations (29-0000) | Kassem et al., 2020 <sup>72</sup>   | n=30   | Physicians and Surgeons, All Other | Cross-sectional survey | 06/01 - 06/14 | Egypt                    | 3.33%           | High |
| Healthcare Practitioners and Technical                       | Kassem et al., 2020 <sup>72</sup>   | n=30   | Physicians and Surgeons, All Other | Cross-sectional survey | 06/01 - 06/14 | Egypt                    | 0%              | High |

|                                                              |                                    |        |                                    |                                                                                   |               |                          |                |          |
|--------------------------------------------------------------|------------------------------------|--------|------------------------------------|-----------------------------------------------------------------------------------|---------------|--------------------------|----------------|----------|
| Occupations (29-0000)                                        |                                    |        |                                    |                                                                                   |               |                          |                |          |
| Healthcare Practitioners and Technical Occupations (29-0000) | Kassem et al., 2020 <sup>72</sup>  | n=30   | Physicians and Surgeons, All Other | Cross-sectional survey                                                            | 06/01 - 06/14 | Egypt                    | 3.33%          | High     |
| Healthcare Practitioners and Technical Occupations (29-0000) | Khan et al., 2020 <sup>127</sup>   | n=980  | Physicians and Surgeons, All Other | Cross-sectional survey                                                            | 06/15 - 06/29 | India                    | 2.8% (1.9-4%)  | Moderate |
| Healthcare Practitioners and Technical Occupations (29-0000) | Kohler et al., 2020 <sup>141</sup> | n=268  | Physicians and Surgeons, All Other | Cross-sectional survey                                                            | 03/19 - 04/03 | Switzerland              | 1.49%          | High     |
| Healthcare Practitioners and Technical Occupations (29-0000) | Kumar et al., 2020 <sup>142</sup>  | n=201  | Physicians and Surgeons, All Other | Cross-sectional survey                                                            | 06/01 - 06/30 | India                    | 7% (4.2-11.4%) | High     |
| Healthcare Practitioners and Technical Occupations (29-0000) | Leidner et al., 2020 <sup>22</sup> | n=1081 | Physicians and Surgeons, All Other | Cross sectional study with prospective cohort follow up of a subset of the sample | 04/08 - 05/22 | United States of America | 3.33%          | High     |
| Healthcare Practitioners and Technical Occupations (29-0000) | Lumley et al., 2020 <sup>9</sup>   | n=1859 | Physicians and Surgeons, All Other | Prospective cohort                                                                | 04/23 - 11/30 | The United Kingdom       | 10.11%         | Moderate |
| Healthcare Practitioners and Technical                       | Martin et al., 2020 <sup>23</sup>  | n=1243 | Physicians and Surgeons, All Other | Cross-sectional survey                                                            | 05/29 - 07/13 | The United Kingdom       | 10.3%          | Moderate |

|                                                              |                                       |        |                                    |                        |               |                          |                  |          |
|--------------------------------------------------------------|---------------------------------------|--------|------------------------------------|------------------------|---------------|--------------------------|------------------|----------|
| Occupations (29-0000)                                        |                                       |        |                                    |                        |               |                          |                  |          |
| Healthcare Practitioners and Technical Occupations (29-0000) | Mesnil et al., 2020 <sup>143</sup>    | n=111  | Physicians and Surgeons, All Other | Cross-sectional survey | 06/08 - 06/22 | France                   | 11%              | High     |
| Healthcare Practitioners and Technical Occupations (29-0000) | Missaglia et al., 2020 <sup>144</sup> | n=377  | Physicians and Surgeons, All Other | Cross-sectional survey | 04/01 - 04/30 | Italy                    | 14.9%            | High     |
| Healthcare Practitioners and Technical Occupations (29-0000) | Mohr et al., 2020 <sup>129</sup>      | n=272  | Physicians and Surgeons, All Other | Cross-sectional survey | 05/13 - 07/08 | United States of America | 2.94%            | Moderate |
| Healthcare Practitioners and Technical Occupations (29-0000) | Moscola et al., 2020 <sup>89</sup>    | n=3746 | Physicians and Surgeons, All Other | Cross-sectional survey | 04/20 - 06/23 | United States of America | 8.7%             | High     |
| Healthcare Practitioners and Technical Occupations (29-0000) | Nishida et al., 2020 <sup>90</sup>    | n=149  | Physicians and Surgeons, All Other | Cross-sectional survey | 06/12 - 06/19 | Japan                    | 1.3% (0.37-4.8%) | Moderate |
| Healthcare Practitioners and Technical Occupations (29-0000) | Nishida et al., 2020 <sup>90</sup>    | n=46   | Physicians and Surgeons, All Other | Cross-sectional survey | 06/12 - 06/19 | Japan                    | 0%               | Moderate |
| Healthcare Practitioners and Technical Occupations (29-0000) | Nishida et al., 2020 <sup>90</sup>    | n=40   | Physicians and Surgeons, All Other | Cross-sectional survey | 06/12 - 06/19 | Japan                    | 0%               | Moderate |

|                                                              |                                         |        |                                    |                        |               |                          |                   |          |
|--------------------------------------------------------------|-----------------------------------------|--------|------------------------------------|------------------------|---------------|--------------------------|-------------------|----------|
| Healthcare Practitioners and Technical Occupations (29-0000) | Nishida et al., 2020 <sup>90</sup>      | n=59   | Physicians and Surgeons, All Other | Cross-sectional survey | 06/12 - 06/19 | Japan                    | 1.7% (0.3-9%)     | Moderate |
| Healthcare Practitioners and Technical Occupations (29-0000) | Nishida et al., 2020 <sup>90</sup>      | n=925  | Physicians and Surgeons, All Other | Cross-sectional survey | 06/12 - 06/19 | Japan                    | 0.43% (0.17-1.1%) | Moderate |
| Healthcare Practitioners and Technical Occupations (29-0000) | Noor et al., 2020 <sup>130</sup>        | n=303  | Physicians and Surgeons, All Other | Cross-sectional survey | 07/13 - 07/15 | Pakistan                 | 19.8%             | Moderate |
| Healthcare Practitioners and Technical Occupations (29-0000) | Orth-Holler et al., 2020 <sup>145</sup> | n=377  | Physicians and Surgeons, All Other | Cross-sectional survey | 03/20 - 03/27 | Austria                  | 0.3% (0.01-1.5%)  | High     |
| Healthcare Practitioners and Technical Occupations (29-0000) | Plebani et al., 2020 <sup>146</sup>     | n=2337 | Physicians and Surgeons, All Other | Cross-sectional survey | 02/22 - 05/29 | Italy                    | 3.6% (2.8-4.4%)   | High     |
| Healthcare Practitioners and Technical Occupations (29-0000) | Rosser et al., 2020 <sup>33</sup>       | n=2533 | Physicians and Surgeons, All Other | Cross-sectional survey | 04/20 - 05/20 | United States of America | 1.07%             | High     |
| Healthcare Practitioners and Technical Occupations (29-0000) | Rudberg et al., 2020 <sup>147</sup>     | n=439  | Physicians and Surgeons, All Other | Cross-sectional survey | 04/14 - 05/08 | Sweden                   | 19.1%             | Moderate |
| Healthcare Practitioners and                                 | Schmidt et al., 2020 <sup>148</sup>     | n=34   | Physicians and Surgeons, All Other | Cross-sectional survey | 04/20 - 04/30 | Germany                  | 8.82%             | High     |



|                                                              |                                       |       |                                    |                        |               |                          |       |          |
|--------------------------------------------------------------|---------------------------------------|-------|------------------------------------|------------------------|---------------|--------------------------|-------|----------|
| Technical Occupations (29-0000)                              |                                       |       |                                    |                        |               |                          |       |          |
| Healthcare Practitioners and Technical Occupations (29-0000) | Sotgiu et al., 2020 <sup>149</sup>    | n=115 | Physicians and Surgeons, All Other | Cross-sectional survey | 04/02 - 04/16 | Italy                    | 6.09% | High     |
| Healthcare Practitioners and Technical Occupations (29-0000) | Venugopal et al., 2020 <sup>150</sup> | n=157 | Physicians and Surgeons, All Other | Cross-sectional survey | 03/01 - 05/01 | United States of America | 25%   | Moderate |
| Healthcare Practitioners and Technical Occupations (29-0000) | Yogo et al., 2020 <sup>36</sup>       | n=110 | Physicians and Surgeons, All Other | Cross-sectional survey | 05/20 - 06/08 | United States of America | 1.82% | High     |
| Healthcare Practitioners and Technical Occupations (29-0000) | Brzostek et al., 2020 <sup>151</sup>  | n=998 | Physician Assistants               | Cross-sectional survey | 04/17 - 05/07 | United States of America | 28.3% | Moderate |
| Healthcare Practitioners and Technical Occupations (29-0000) | Hoffmann et al., 2020 <sup>152</sup>  | n=156 | Physician Assistants               | Prospective cohort     | 07/01 - 07/31 | Germany                  | 1.3%  | High     |
| Healthcare Practitioners and Technical Occupations (29-0000) | Mohr et al., 2020 <sup>129</sup>      | n=156 | Physician Assistants               | Cross-sectional survey | 05/13 - 07/08 | United States of America | 0.64% | Moderate |
| Healthcare Practitioners and Technical                       | Morcuende et al., 2020 <sup>88</sup>  | n=6   | Physician Assistants               | Cross-sectional survey | 03/01 - 04/21 | United States of America | 9.43% | High     |

|                                                              |                                      |       |                         |                        |               |                          |                 |          |
|--------------------------------------------------------------|--------------------------------------|-------|-------------------------|------------------------|---------------|--------------------------|-----------------|----------|
| Occupations (29-0000)                                        |                                      |       |                         |                        |               |                          |                 |          |
| Healthcare Practitioners and Technical Occupations (29-0000) | Morcuende et al., 2020 <sup>88</sup> | n=53  | Physician Assistants    | Cross-sectional survey | 03/01 - 04/21 | United States of America | 9.43%           | High     |
| Healthcare Practitioners and Technical Occupations (29-0000) | Patel et al., 2020 <sup>153</sup>    | n=230 | Physician Assistants    | Prospective cohort     | 06/02 - 06/27 | United States of America | 3.48%           | High     |
| Healthcare Practitioners and Technical Occupations (29-0000) | Self et al., 2020 <sup>154</sup>     | n=919 | Physician Assistants    | Cross-sectional survey | 04/03 - 06/19 | United States of America | 5.66%           | Moderate |
| Healthcare Practitioners and Technical Occupations (29-0000) | Shah et al., 2020 <sup>155</sup>     | n=248 | Physician Assistants    | Cross-sectional survey | 05/25 - 07/09 | United States of America | 0%              | High     |
| Healthcare Practitioners and Technical Occupations (29-0000) | Shah et al., 2020 <sup>155</sup>     | n=320 | Physician Assistants    | Cross-sectional survey | 05/25 - 07/09 | United States of America | 0.63%           | High     |
| Healthcare Practitioners and Technical Occupations (29-0000) | Lumley et al., 2020 <sup>9</sup>     | n=386 | Occupational Therapists | Prospective cohort     | 04/23 - 11/30 | The United Kingdom       | 11.4%           | Moderate |
| Healthcare Practitioners and Technical Occupations (29-0000) | Akinbami et al., 2020 <sup>46</sup>  | n=235 | Physical Therapists     | Cross-sectional survey | 05/18 - 06/13 | United States of America | 10.6% (7-15.3%) | Moderate |

|                                                              |                                     |       |                        |                                                                                   |               |                          |                  |          |
|--------------------------------------------------------------|-------------------------------------|-------|------------------------|-----------------------------------------------------------------------------------|---------------|--------------------------|------------------|----------|
| Healthcare Practitioners and Technical Occupations (29-0000) | Brehm et al., 2020 <sup>7</sup>     | n=15  | Physical Therapists    | Cross sectional study with prospective cohort follow up of a subset of the sample | 03/20 - 07/17 | Germany                  | 0%               | Moderate |
| Healthcare Practitioners and Technical Occupations (29-0000) | Cooper et al., 2020 <sup>59</sup>   | n=84  | Physical Therapists    | Cross-sectional survey                                                            | 06/10 - 08/07 | The United Kingdom       | 10.71%           | Moderate |
| Healthcare Practitioners and Technical Occupations (29-0000) | Costa et al., 2020 <sup>128</sup>   | n=159 | Physical Therapists    | Cross-sectional survey                                                            | 05/14 - 05/28 | Brazil                   | 10.7%            | Moderate |
| Healthcare Practitioners and Technical Occupations (29-0000) | Akinbami et al., 2020 <sup>46</sup> | n=409 | Respiratory Therapists | Cross-sectional survey                                                            | 05/18 - 06/13 | United States of America | 8.3% (5.8-11.4%) | Moderate |
| Healthcare Practitioners and Technical Occupations (29-0000) | Brunner et al., 2020 <sup>54</sup>  | n=42  | Respiratory Therapists | Cross-sectional survey                                                            | 05/04 - 05/29 | United States of America | 0%               | High     |
| Healthcare Practitioners and Technical Occupations (29-0000) | Godbout et al., 2020 <sup>138</sup> | n=25  | Respiratory Therapists | Cross-sectional survey                                                            | 07/27 - 10/02 | United States of America | 0%               | High     |
| Healthcare Practitioners and Technical Occupations (29-0000) | Hunter et al., 2020 <sup>21</sup>   | n=94  | Respiratory Therapists | Cross-sectional survey                                                            | 04/29 - 05/08 | United States of America | 0%               | High     |

|                                                              |                                      |        |                        |                        |               |                          |                 |          |
|--------------------------------------------------------------|--------------------------------------|--------|------------------------|------------------------|---------------|--------------------------|-----------------|----------|
| Healthcare Practitioners and Technical Occupations (29-0000) | Rosser et al., 2020 <sup>33</sup>    | n=135  | Respiratory Therapists | Cross-sectional survey | 04/20 - 05/20 | United States of America | 0%              | High     |
| Healthcare Practitioners and Technical Occupations (29-0000) | Self et al., 2020 <sup>154</sup>     | n=235  | Respiratory Therapists | Cross-sectional survey | 04/03 - 06/19 | United States of America | 4.26%           | Moderate |
| Healthcare Practitioners and Technical Occupations (29-0000) | Yogo et al., 2020 <sup>36</sup>      | n=121  | Respiratory Therapists | Cross-sectional survey | 05/20 - 06/08 | United States of America | 0%              | High     |
| Healthcare Practitioners and Technical Occupations (29-0000) | Rosser et al., 2020 <sup>33</sup>    | n=253  | Therapists, All Other  | Cross-sectional survey | 04/20 - 05/20 | United States of America | 1.58%           | High     |
| Healthcare Practitioners and Technical Occupations (29-0000) | Schmidt et al., 2020 <sup>148</sup>  | n=80   | Therapists, All Other  | Cross-sectional survey | 04/20 - 04/30 | Germany                  | 3.75%           | High     |
| Healthcare Practitioners and Technical Occupations (29-0000) | Yogo et al., 2020 <sup>36</sup>      | n=22   | Therapists, All Other  | Cross-sectional survey | 05/20 - 06/08 | United States of America | 4.55%           | High     |
| Healthcare Practitioners and Technical Occupations (29-0000) | Calcagno et al., 2020 <sup>124</sup> | n=13   | Veterinarians          | Cross-sectional survey | 04/17 - 05/20 | Italy                    | 0%              | Moderate |
| Healthcare Practitioners and                                 | Akinbami et al., 2020 <sup>46</sup>  | n=6426 | Registered Nurses      | Cross-sectional survey | 05/18 - 06/13 | United States of America | 7.7% (7.1-8.4%) | Moderate |

|                                                              |                                     |       |                   |                        |               |                    |                   |      |
|--------------------------------------------------------------|-------------------------------------|-------|-------------------|------------------------|---------------|--------------------|-------------------|------|
| Technical Occupations (29-0000)                              |                                     |       |                   |                        |               |                    |                   |      |
| Healthcare Practitioners and Technical Occupations (29-0000) | Alharbi et al., 2020 <sup>125</sup> | n=70  | Registered Nurses | Cross-sectional survey | 04/18 - 06/17 | Saudi Arabia       | 10%               | High |
| Healthcare Practitioners and Technical Occupations (29-0000) | Alharbi et al., 2020 <sup>125</sup> | n=9   | Registered Nurses | Cross-sectional survey | 04/18 - 06/17 | Saudi Arabia       | 33.33%            | High |
| Healthcare Practitioners and Technical Occupations (29-0000) | Alharbi et al., 2020 <sup>125</sup> | n=76  | Registered Nurses | Cross-sectional survey | 04/18 - 06/17 | Saudi Arabia       | 26.32%            | High |
| Healthcare Practitioners and Technical Occupations (29-0000) | Alharbi et al., 2020 <sup>125</sup> | n=21  | Registered Nurses | Cross-sectional survey | 04/18 - 06/17 | Saudi Arabia       | 14.29%            | High |
| Healthcare Practitioners and Technical Occupations (29-0000) | Alharbi et al., 2020 <sup>125</sup> | n=43  | Registered Nurses | Cross-sectional survey | 04/18 - 06/17 | Saudi Arabia       | 27.91%            | High |
| Healthcare Practitioners and Technical Occupations (29-0000) | Amendola et al., 2020 <sup>47</sup> | n=216 | Registered Nurses | Cross-sectional survey | 04/15 - 04/15 | Italy              | 6.02%             | High |
| Healthcare Practitioners and Technical                       | Bampoe et al., 2020 <sup>156</sup>  | n=52  | Registered Nurses | Cross-sectional survey | 05/11 - 06/05 | The United Kingdom | 13.5% (5.6-25.8%) | High |

|                                                              |                                       |        |                   |                                                                                   |               |                    |                   |          |
|--------------------------------------------------------------|---------------------------------------|--------|-------------------|-----------------------------------------------------------------------------------|---------------|--------------------|-------------------|----------|
| Occupations (29-0000)                                        |                                       |        |                   |                                                                                   |               |                    |                   |          |
| Healthcare Practitioners and Technical Occupations (29-0000) | Bampoe et al., 2020 <sup>156</sup>    | n=40   | Registered Nurses | Cross-sectional survey                                                            | 05/11 - 06/05 | The United Kingdom | 12.5% (4.2-26.8%) | High     |
| Healthcare Practitioners and Technical Occupations (29-0000) | Baracco et al., 2020 <sup>24</sup>    | n=1014 | Registered Nurses | Cross-sectional survey                                                            | 04/23 - 05/05 | Italy              | 17.9%             | High     |
| Healthcare Practitioners and Technical Occupations (29-0000) | Barallat et al., 2020 <sup>50</sup>   | n=2243 | Registered Nurses | Cross-sectional survey                                                            | 05/04 - 05/22 | Spain              | 10.64%            | High     |
| Healthcare Practitioners and Technical Occupations (29-0000) | Brehm et al., 2020 <sup>7</sup>       | n=444  | Registered Nurses | Cross sectional study with prospective cohort follow up of a subset of the sample | 03/20 - 07/17 | Germany            | 2.3%              | Moderate |
| Healthcare Practitioners and Technical Occupations (29-0000) | Brousseau et al., 2020 <sup>134</sup> | n=1189 | Registered Nurses | Cross-sectional survey                                                            | 07/06 - 09/24 | Canada             | 11.9%             | High     |
| Healthcare Practitioners and Technical Occupations (29-0000) | Calcagno et al., 2020 <sup>124</sup>  | n=1833 | Registered Nurses | Cross-sectional survey                                                            | 04/17 - 05/20 | Italy              | 8.18%             | Moderate |
| Healthcare Practitioners and Technical                       | Chau et al., 2020 <sup>126</sup>      | n=144  | Registered Nurses | Cross-sectional survey                                                            | 08/23 - 08/30 | Viet Nam           | 0%                | High     |

|                                                              |                                      |        |                   |                        |               |                          |        |          |
|--------------------------------------------------------------|--------------------------------------|--------|-------------------|------------------------|---------------|--------------------------|--------|----------|
| Occupations (29-0000)                                        |                                      |        |                   |                        |               |                          |        |          |
| Healthcare Practitioners and Technical Occupations (29-0000) | Chen et al., 2020 <sup>135</sup>     | n=25   | Registered Nurses | Cross-sectional survey | 02/19 - 02/19 | China                    | 8%     | High     |
| Healthcare Practitioners and Technical Occupations (29-0000) | Cooper et al., 2020 <sup>59</sup>    | n=3471 | Registered Nurses | Cross-sectional survey | 06/10 - 08/07 | The United Kingdom       | 7.52%  | Moderate |
| Healthcare Practitioners and Technical Occupations (29-0000) | Costa et al., 2020 <sup>128</sup>    | n=370  | Registered Nurses | Cross-sectional survey | 05/14 - 05/28 | Brazil                   | 11.4%  | Moderate |
| Healthcare Practitioners and Technical Occupations (29-0000) | Dimcheff et al., 2020 <sup>157</sup> | n=412  | Registered Nurses | Cross-sectional survey | 06/08 - 07/08 | United States of America | 7%     | Moderate |
| Healthcare Practitioners and Technical Occupations (29-0000) | Erber et al., 2020 <sup>31</sup>     | n=958  | Registered Nurses | Cross-sectional survey | 04/14 - 05/29 | Germany                  | 2.5%   | High     |
| Healthcare Practitioners and Technical Occupations (29-0000) | Favara et al., 2020 <sup>136</sup>   | n=45   | Registered Nurses | Prospective cohort     | 06/01 - 06/07 | The United Kingdom       | 28.89% | High     |
| Healthcare Practitioners and Technical Occupations (29-0000) | Favara et al., 2020 <sup>19</sup>    | n=237  | Registered Nurses | Cross-sectional survey | 07/13 - 07/13 | The United Kingdom       | 16.5%  | High     |

|                                                              |                                          |        |                   |                        |               |                          |        |          |
|--------------------------------------------------------------|------------------------------------------|--------|-------------------|------------------------|---------------|--------------------------|--------|----------|
| Healthcare Practitioners and Technical Occupations (29-0000) | Finkenzeller et al., 2020 <sup>158</sup> | n=251  | Registered Nurses | Prospective cohort     | 06/29 - 07/29 | Germany                  | 12%    | Moderate |
| Healthcare Practitioners and Technical Occupations (29-0000) | Finkenzeller et al., 2020 <sup>158</sup> | n=887  | Registered Nurses | Prospective cohort     | 06/29 - 07/29 | Germany                  | 20%    | Moderate |
| Healthcare Practitioners and Technical Occupations (29-0000) | Fujita et al., 2020 <sup>137</sup>       | n=50   | Registered Nurses | Cross-sectional survey | 04/10 - 04/20 | Japan                    | 6%     | High     |
| Healthcare Practitioners and Technical Occupations (29-0000) | Galan et al., 2020 <sup>20</sup>         | n=687  | Registered Nurses | Cross-sectional survey | 04/14 - 04/27 | Spain                    | 30.71% | High     |
| Healthcare Practitioners and Technical Occupations (29-0000) | Godbout et al., 2020 <sup>138</sup>      | n=937  | Registered Nurses | Cross-sectional survey | 07/27 - 10/02 | United States of America | 1.39%  | High     |
| Healthcare Practitioners and Technical Occupations (29-0000) | Goenka et al., 2020 <sup>25</sup>        | n=224  | Registered Nurses | Cross-sectional survey | 07/12 - 08/23 | India                    | 9.38%  | Moderate |
| Healthcare Practitioners and Technical Occupations (29-0000) | Goenka et al., 2020 <sup>26</sup>        | n=43   | Registered Nurses | Cross-sectional survey | 08/01 - 08/31 | India                    | 34.88% | High     |
| Healthcare Practitioners and                                 | Grant et al., 2020 <sup>159</sup>        | n=1345 | Registered Nurses | Cross-sectional survey | 05/15 - 06/05 | The United Kingdom       | 34.7%  | High     |



|                                                              |                                      |        |                   |                        |               |                          |                    |          |
|--------------------------------------------------------------|--------------------------------------|--------|-------------------|------------------------|---------------|--------------------------|--------------------|----------|
| Technical Occupations (29-0000)                              |                                      |        |                   |                        |               |                          |                    |          |
| Healthcare Practitioners and Technical Occupations (29-0000) | Grant et al., 2020 <sup>159</sup>    | n=108  | Registered Nurses | Cross-sectional survey | 05/15 - 06/05 | The United Kingdom       | 25%                | High     |
| Healthcare Practitioners and Technical Occupations (29-0000) | Hanrath et al., 2020 <sup>32</sup>   | n=749  | Registered Nurses | Cross-sectional survey | 05/29 - 07/06 | The United Kingdom       | 8.99%              | High     |
| Healthcare Practitioners and Technical Occupations (29-0000) | Haq et al., 2020 <sup>67</sup>       | n=209  | Registered Nurses | Cross-sectional survey | 06/15 - 06/29 | Pakistan                 | 38.8% (32.1-45.7%) | Moderate |
| Healthcare Practitioners and Technical Occupations (29-0000) | Houlihan et al., 2020 <sup>139</sup> | n=106  | Registered Nurses | Cross-sectional survey | 03/26 - 04/08 | The United Kingdom       | 24%                | High     |
| Healthcare Practitioners and Technical Occupations (29-0000) | Houlihan et al., 2020 <sup>139</sup> | n=22   | Registered Nurses | Cross-sectional survey | 03/26 - 04/08 | The United Kingdom       | 23%                | High     |
| Healthcare Practitioners and Technical Occupations (29-0000) | Hunter et al., 2020 <sup>21</sup>    | n=317  | Registered Nurses | Cross-sectional survey | 04/29 - 05/08 | United States of America | 2.2%               | High     |
| Healthcare Practitioners and Technical                       | Iversen et al., 2020 <sup>8</sup>    | n=9963 | Registered Nurses | Cross-sectional survey | 04/15 - 04/22 | Denmark                  | 4.03%              | Low      |

|                                                              |                                     |        |                   |                        |               |                          |        |      |
|--------------------------------------------------------------|-------------------------------------|--------|-------------------|------------------------|---------------|--------------------------|--------|------|
| Occupations (29-0000)                                        |                                     |        |                   |                        |               |                          |        |      |
| Healthcare Practitioners and Technical Occupations (29-0000) | Iversen et al., 2020 <sup>8</sup>   | n=1786 | Registered Nurses | Cross-sectional survey | 04/15 - 04/22 | Denmark                  | 4.65%  | Low  |
| Healthcare Practitioners and Technical Occupations (29-0000) | Jeremias et al., 2020 <sup>70</sup> | n=1043 | Registered Nurses | Cross-sectional survey | 03/01 - 04/30 | United States of America | 9.5%   | High |
| Healthcare Practitioners and Technical Occupations (29-0000) | Jones et al., 2020 <sup>29</sup>    | n=1962 | Registered Nurses | Cross-sectional survey | 01/15 - 06/15 | The United Kingdom       | 10.5%  | High |
| Healthcare Practitioners and Technical Occupations (29-0000) | Kassem et al., 2020 <sup>72</sup>   | n=28   | Registered Nurses | Cross-sectional survey | 06/01 - 06/14 | Egypt                    | 10.71% | High |
| Healthcare Practitioners and Technical Occupations (29-0000) | Kassem et al., 2020 <sup>72</sup>   | n=28   | Registered Nurses | Cross-sectional survey | 06/01 - 06/14 | Egypt                    | 7.14%  | High |
| Healthcare Practitioners and Technical Occupations (29-0000) | Kassem et al., 2020 <sup>72</sup>   | n=28   | Registered Nurses | Cross-sectional survey | 06/01 - 06/14 | Egypt                    | 3.57%  | High |
| Healthcare Practitioners and Technical Occupations (29-0000) | Kassem et al., 2020 <sup>72</sup>   | n=28   | Registered Nurses | Cross-sectional survey | 06/01 - 06/14 | Egypt                    | 0%     | High |

|                                                              |                                     |        |                   |                                                                                   |               |                          |                  |          |
|--------------------------------------------------------------|-------------------------------------|--------|-------------------|-----------------------------------------------------------------------------------|---------------|--------------------------|------------------|----------|
| Healthcare Practitioners and Technical Occupations (29-0000) | Khan et al., 2020 <sup>127</sup>    | n=321  | Registered Nurses | Cross-sectional survey                                                            | 06/15 - 06/29 | India                    | 2.8% (1.5-5.3%)  | Moderate |
| Healthcare Practitioners and Technical Occupations (29-0000) | Kohler et al., 2020 <sup>141</sup>  | n=398  | Registered Nurses | Cross-sectional survey                                                            | 03/19 - 04/03 | Switzerland              | 0.75%            | High     |
| Healthcare Practitioners and Technical Occupations (29-0000) | Kumar et al., 2020 <sup>142</sup>   | n=308  | Registered Nurses | Cross-sectional survey                                                            | 06/01 - 06/30 | India                    | 6.8% (4.5-10.2%) | High     |
| Healthcare Practitioners and Technical Occupations (29-0000) | Leidner et al., 2020 <sup>22</sup>  | n=110  | Registered Nurses | Cross sectional study with prospective cohort follow up of a subset of the sample | 04/08 - 05/22 | United States of America | 0%               | High     |
| Healthcare Practitioners and Technical Occupations (29-0000) | Leidner et al., 2020 <sup>22</sup>  | n=3504 | Registered Nurses | Cross sectional study with prospective cohort follow up of a subset of the sample | 04/08 - 05/22 | United States of America | 2.34%            | High     |
| Healthcare Practitioners and Technical Occupations (29-0000) | Lumley et al., 2020 <sup>9</sup>    | n=4528 | Registered Nurses | Prospective cohort                                                                | 04/23 - 11/30 | The United Kingdom       | 13.21%           | Moderate |
| Healthcare Practitioners and Technical Occupations (29-0000) | Mansour et al., 2020 <sup>160</sup> | n=285  | Registered Nurses | Cross-sectional survey                                                            | 03/24 - 04/04 | United States of America | 32.63%           | High     |

|                                                              |                                      |         |                   |                        |               |                          |       |          |
|--------------------------------------------------------------|--------------------------------------|---------|-------------------|------------------------|---------------|--------------------------|-------|----------|
| Healthcare Practitioners and Technical Occupations (29-0000) | Martin et al., 2020 <sup>161</sup>   | n=580   | Registered Nurses | Cross-sectional survey | 04/01 - 04/15 | Spain                    | 5.52% | High     |
| Healthcare Practitioners and Technical Occupations (29-0000) | Martin et al., 2020 <sup>161</sup>   | n=74    | Registered Nurses | Cross-sectional survey | 04/01 - 04/15 | Spain                    | 9.46% | High     |
| Healthcare Practitioners and Technical Occupations (29-0000) | Martin et al., 2020 <sup>161</sup>   | n=676   | Registered Nurses | Cross-sectional survey | 04/01 - 04/15 | Spain                    | 5.92% | High     |
| Healthcare Practitioners and Technical Occupations (29-0000) | Martin et al., 2020 <sup>161</sup>   | n=337   | Registered Nurses | Cross-sectional survey | 04/01 - 04/15 | Spain                    | 5.93% | High     |
| Healthcare Practitioners and Technical Occupations (29-0000) | Martin et al., 2020 <sup>161</sup>   | n=339   | Registered Nurses | Cross-sectional survey | 04/01 - 04/15 | Spain                    | 5.9%  | High     |
| Healthcare Practitioners and Technical Occupations (29-0000) | Meissner et al., 2020 <sup>162</sup> | n=439   | Registered Nurses | Cross-sectional survey | 04/14 - 05/06 | United States of America | 1.37% | High     |
| Healthcare Practitioners and Technical Occupations (29-0000) | Mohr et al., 2020 <sup>129</sup>     | n=410   | Registered Nurses | Cross-sectional survey | 05/13 - 07/08 | United States of America | 1.46% | Moderate |
| Healthcare Practitioners and                                 | Moscola et al., 2020 <sup>89</sup>   | n=11468 | Registered Nurses | Cross-sectional survey | 04/20 - 06/23 | United States of America | 13.1% | High     |

|                                                              |                                      |        |                   |                                                                                   |               |                            |                  |          |
|--------------------------------------------------------------|--------------------------------------|--------|-------------------|-----------------------------------------------------------------------------------|---------------|----------------------------|------------------|----------|
| Technical Occupations (29-0000)                              |                                      |        |                   |                                                                                   |               |                            |                  |          |
| Healthcare Practitioners and Technical Occupations (29-0000) | Mostafa et al., 2020 <sup>163</sup>  | n=4040 | Registered Nurses | Cross-sectional survey                                                            | 04/22 - 05/14 | Egypt                      | 1.31%            | High     |
| Healthcare Practitioners and Technical Occupations (29-0000) | Nishida et al., 2020 <sup>90</sup>   | n=489  | Registered Nurses | Cross-sectional survey                                                            | 06/12 - 06/19 | Japan                      | 0.2% (0.04-1.1%) | Moderate |
| Healthcare Practitioners and Technical Occupations (29-0000) | Noor et al., 2020 <sup>130</sup>     | n=460  | Registered Nurses | Cross-sectional survey                                                            | 07/13 - 07/15 | Pakistan                   | 39.78%           | Moderate |
| Healthcare Practitioners and Technical Occupations (29-0000) | Paradiso et al., 2020 <sup>164</sup> | n=606  | Registered Nurses | Cross sectional study with prospective cohort follow up of a subset of the sample | 03/26 - 04/17 | Italy                      | 0.33%            | High     |
| Healthcare Practitioners and Technical Occupations (29-0000) | Plebani et al., 2020 <sup>146</sup>  | n=3230 | Registered Nurses | Cross-sectional survey                                                            | 02/22 - 05/29 | Italy                      | 4.7% (4-5.5%)    | High     |
| Healthcare Practitioners and Technical Occupations (29-0000) | Poustchi et al., 2020 <sup>28</sup>  | n=1245 | Registered Nurses | Cross-sectional survey                                                            | 04/17 - 06/02 | Iran (Islamic Republic of) | 15.9% (13.9-18%) | Moderate |
| Healthcare Practitioners and Technical                       | Rudberg et al., 2020 <sup>147</sup>  | n=636  | Registered Nurses | Cross-sectional survey                                                            | 04/14 - 05/08 | Sweden                     | 21.9%            | Moderate |

|                                                              |                                     |        |                   |                        |               |                          |                  |          |
|--------------------------------------------------------------|-------------------------------------|--------|-------------------|------------------------|---------------|--------------------------|------------------|----------|
| Occupations (29-0000)                                        |                                     |        |                   |                        |               |                          |                  |          |
| Healthcare Practitioners and Technical Occupations (29-0000) | Schmidt et al., 2020 <sup>148</sup> | n=154  | Registered Nurses | Cross-sectional survey | 04/20 - 04/30 | Germany                  | 0%               | High     |
| Healthcare Practitioners and Technical Occupations (29-0000) | Self et al., 2020 <sup>154</sup>    | n=1445 | Registered Nurses | Cross-sectional survey | 04/03 - 06/19 | United States of America | 5.05%            | Moderate |
| Healthcare Practitioners and Technical Occupations (29-0000) | Siddiqui et al., 2020 <sup>2</sup>  | n=59   | Registered Nurses | Prospective cohort     | 04/15 - 08/15 | India                    | 10.2%            | High     |
| Healthcare Practitioners and Technical Occupations (29-0000) | Siddiqui et al., 2020 <sup>2</sup>  | n=70   | Registered Nurses | Prospective cohort     | 04/15 - 08/15 | India                    | 10%              | High     |
| Healthcare Practitioners and Technical Occupations (29-0000) | Sotgiu et al., 2020 <sup>149</sup>  | n=64   | Registered Nurses | Cross-sectional survey | 04/02 - 04/16 | Italy                    | 7.8% (1.2-14.4%) | High     |
| Healthcare Practitioners and Technical Occupations (29-0000) | Sydney et al., 2020 <sup>165</sup>  | n=81   | Registered Nurses | Cross-sectional survey | 04/28 - 05/04 | United States of America | 18.52%           | High     |
| Healthcare Practitioners and Technical Occupations (29-0000) | Urbieta et al., 2020 <sup>132</sup> | n=83   | Registered Nurses | Cross-sectional survey | 04/14 - 04/16 | Spain                    | 4.8%             | High     |

|                                                              |                                       |        |                                      |                        |               |                          |                 |          |
|--------------------------------------------------------------|---------------------------------------|--------|--------------------------------------|------------------------|---------------|--------------------------|-----------------|----------|
| Healthcare Practitioners and Technical Occupations (29-0000) | Urbieta et al., 2020 <sup>132</sup>   | n=23   | Registered Nurses                    | Cross-sectional survey | 04/14 - 04/16 | Spain                    | 8.7%            | High     |
| Healthcare Practitioners and Technical Occupations (29-0000) | Venugopal et al., 2020 <sup>150</sup> | n=142  | Registered Nurses                    | Cross-sectional survey | 03/01 - 05/01 | United States of America | 28%             | Moderate |
| Healthcare Practitioners and Technical Occupations (29-0000) | Yogo et al., 2020 <sup>36</sup>       | n=1129 | Registered Nurses                    | Cross-sectional survey | 05/20 - 06/08 | United States of America | 2.48%           | High     |
| Healthcare Practitioners and Technical Occupations (29-0000) | Yogo et al., 2020 <sup>36</sup>       | n=12   | Registered Nurses                    | Cross-sectional survey | 05/20 - 06/08 | United States of America | 0%              | High     |
| Healthcare Practitioners and Technical Occupations (29-0000) | Zhou et al., 2020 <sup>166</sup>      | n=2406 | Registered Nurses                    | Cross-sectional survey | 03/16 - 03/25 | China                    | 1.37%           | Moderate |
| Healthcare Practitioners and Technical Occupations (29-0000) | Godbout et al., 2020 <sup>138</sup>   | n=141  | Nurse Practitioners                  | Cross-sectional survey | 07/27 - 10/02 | United States of America | 1.42%           | High     |
| Healthcare Practitioners and Technical Occupations (29-0000) | Dimcheff et al., 2020 <sup>157</sup>  | n=214  | Nurse Practitioners                  | Cross-sectional survey | 06/08 - 07/08 | United States of America | 3.7%            | Moderate |
| Healthcare Practitioners and                                 | Akinbami et al., 2020 <sup>46</sup>   | n=719  | Health Technologists and Technicians | Cross-sectional survey | 05/18 - 06/13 | United States of America | 4.2% (2.8-5.9%) | Moderate |

|                                                              |                                     |       |                                                   |                        |               |                          |                 |          |
|--------------------------------------------------------------|-------------------------------------|-------|---------------------------------------------------|------------------------|---------------|--------------------------|-----------------|----------|
| Technical Occupations (29-0000)                              |                                     |       |                                                   |                        |               |                          |                 |          |
| Healthcare Practitioners and Technical Occupations (29-0000) | Blairon et al., 2020 <sup>52</sup>  | n=61  | Health Technologists and Technicians              | Cross-sectional survey | 05/25 - 06/19 | Belgium                  | 6.6%            | High     |
| Healthcare Practitioners and Technical Occupations (29-0000) | Yogo et al., 2020 <sup>36</sup>     | n=65  | Health Technologists and Technicians              | Cross-sectional survey | 05/20 - 06/08 | United States of America | 4.62%           | High     |
| Healthcare Practitioners and Technical Occupations (29-0000) | Silva et al., 2020 <sup>34</sup>    | n=224 | Clinical Laboratory Technologists and Technicians | Cross-sectional survey | 06/05 - 07/31 | Brazil                   | 7.59%           | High     |
| Healthcare Practitioners and Technical Occupations (29-0000) | Costa et al., 2020 <sup>128</sup>   | n=66  | Medical and Clinical Laboratory Technologists     | Cross-sectional survey | 05/14 - 05/28 | Brazil                   | 3%              | Moderate |
| Healthcare Practitioners and Technical Occupations (29-0000) | Akinbami et al., 2020 <sup>46</sup> | n=293 | Medical and Clinical Laboratory Technicians       | Cross-sectional survey | 05/18 - 06/13 | United States of America | 3.4% (1.7-6.2%) | Moderate |
| Healthcare Practitioners and Technical Occupations (29-0000) | Akinbami et al., 2020 <sup>46</sup> | n=365 | Medical and Clinical Laboratory Technicians       | Cross-sectional survey | 05/18 - 06/13 | United States of America | 5.5% (3.4-8.3%) | Moderate |
| Healthcare Practitioners and Technical                       | Alharbi et al., 2020 <sup>125</sup> | n=80  | Medical and Clinical Laboratory Technicians       | Cross-sectional survey | 04/18 - 06/17 | Saudi Arabia             | 20%             | High     |



|                                                              |                                      |       |                                             |                                                                                   |               |          |        |          |
|--------------------------------------------------------------|--------------------------------------|-------|---------------------------------------------|-----------------------------------------------------------------------------------|---------------|----------|--------|----------|
| Occupations (29-0000)                                        |                                      |       |                                             |                                                                                   |               |          |        |          |
| Healthcare Practitioners and Technical Occupations (29-0000) | Baracco et al., 2020 <sup>24</sup>   | n=256 | Medical and Clinical Laboratory Technicians | Cross-sectional survey                                                            | 04/23 - 05/05 | Italy    | 12.1%  | High     |
| Healthcare Practitioners and Technical Occupations (29-0000) | Brehm et al., 2020 <sup>7</sup>      | n=105 | Medical and Clinical Laboratory Technicians | Cross sectional study with prospective cohort follow up of a subset of the sample | 03/20 - 07/17 | Germany  | 0%     | Moderate |
| Healthcare Practitioners and Technical Occupations (29-0000) | Calcagno et al., 2020 <sup>124</sup> | n=216 | Medical and Clinical Laboratory Technicians | Cross-sectional survey                                                            | 04/17 - 05/20 | Italy    | 6.94%  | Moderate |
| Healthcare Practitioners and Technical Occupations (29-0000) | Calcagno et al., 2020 <sup>124</sup> | n=157 | Medical and Clinical Laboratory Technicians | Cross-sectional survey                                                            | 04/17 - 05/20 | Italy    | 11.46% | Moderate |
| Healthcare Practitioners and Technical Occupations (29-0000) | Chau et al., 2020 <sup>126</sup>     | n=33  | Medical and Clinical Laboratory Technicians | Cross-sectional survey                                                            | 08/23 - 08/30 | Viet Nam | 0%     | High     |
| Healthcare Practitioners and Technical Occupations (29-0000) | Galan et al., 2020 <sup>20</sup>     | n=192 | Medical and Clinical Laboratory Technicians | Cross-sectional survey                                                            | 04/14 - 04/27 | Spain    | 21.35% | High     |
| Healthcare Practitioners and Technical Occupations (29-0000) | Goenka et al., 2020 <sup>25</sup>    | n=72  | Medical and Clinical Laboratory Technicians | Cross-sectional survey                                                            | 07/12 - 08/23 | India    | 15.28% | Moderate |

|                                                              |                                    |        |                                             |                        |               |                          |                  |          |
|--------------------------------------------------------------|------------------------------------|--------|---------------------------------------------|------------------------|---------------|--------------------------|------------------|----------|
| Occupations (29-0000)                                        |                                    |        |                                             |                        |               |                          |                  |          |
| Healthcare Practitioners and Technical Occupations (29-0000) | Haq et al., 2020 <sup>67</sup>     | n=32   | Medical and Clinical Laboratory Technicians | Cross-sectional survey | 06/15 - 06/29 | Pakistan                 | 50% (31.8-68.1%) | Moderate |
| Healthcare Practitioners and Technical Occupations (29-0000) | Iversen et al., 2020 <sup>8</sup>  | n=1292 | Medical and Clinical Laboratory Technicians | Cross-sectional survey | 04/15 - 04/22 | Denmark                  | 1.93%            | Low      |
| Healthcare Practitioners and Technical Occupations (29-0000) | Khan et al., 2020 <sup>127</sup>   | n=397  | Medical and Clinical Laboratory Technicians | Cross-sectional survey | 06/15 - 06/29 | India                    | 2.5% (1.4-4.6%)  | Moderate |
| Healthcare Practitioners and Technical Occupations (29-0000) | Lumley et al., 2020 <sup>9</sup>   | n=452  | Medical and Clinical Laboratory Technicians | Prospective cohort     | 04/23 - 11/30 | The United Kingdom       | 8.63%            | Moderate |
| Healthcare Practitioners and Technical Occupations (29-0000) | Nishida et al., 2020 <sup>90</sup> | n=140  | Medical and Clinical Laboratory Technicians | Cross-sectional survey | 06/12 - 06/19 | Japan                    | 0%               | Moderate |
| Healthcare Practitioners and Technical Occupations (29-0000) | Rosser et al., 2020 <sup>33</sup>  | n=225  | Medical and Clinical Laboratory Technicians | Cross-sectional survey | 04/20 - 05/20 | United States of America | 0.44%            | High     |
| Healthcare Practitioners and Technical Occupations (29-0000) | Iversen et al., 2020 <sup>8</sup>  | n=342  | Radiologic Technologists                    | Cross-sectional survey | 04/15 - 04/22 | Denmark                  | 3.51%            | Low      |

|                                                              |                                     |        |                                              |                        |               |                          |                  |          |
|--------------------------------------------------------------|-------------------------------------|--------|----------------------------------------------|------------------------|---------------|--------------------------|------------------|----------|
| Healthcare Practitioners and Technical Occupations (29-0000) | Martin et al., 2020 <sup>23</sup>   | n=241  | Radiologic Technologists                     | Cross-sectional survey | 05/29 - 07/13 | The United Kingdom       | 9.96%            | Moderate |
| Healthcare Practitioners and Technical Occupations (29-0000) | Akinbami et al., 2020 <sup>46</sup> | n=1158 | Emergency Medical Technicians and Paramedics | Cross-sectional survey | 05/18 - 06/13 | United States of America | 5.2% (4-6.6%)    | Moderate |
| Healthcare Practitioners and Technical Occupations (29-0000) | Buntinx et al., 2020 <sup>167</sup> | n=10   | Emergency Medical Technicians and Paramedics | Cross-sectional survey | 04/14 - 04/16 | Belgium                  | 10%              | High     |
| Healthcare Practitioners and Technical Occupations (29-0000) | Haq et al., 2020 <sup>67</sup>      | n=157  | Emergency Medical Technicians and Paramedics | Cross-sectional survey | 06/15 - 06/29 | Pakistan                 | 42% (34.2-50.1%) | Moderate |
| Healthcare Practitioners and Technical Occupations (29-0000) | Iversen et al., 2020 <sup>8</sup>   | n=323  | Emergency Medical Technicians and Paramedics | Cross-sectional survey | 04/15 - 04/22 | Denmark                  | 4.95%            | Low      |
| Healthcare Practitioners and Technical Occupations (29-0000) | Mesnil et al., 2020 <sup>143</sup>  | n=212  | Emergency Medical Technicians and Paramedics | Cross-sectional survey | 06/08 - 06/22 | France                   | 11%              | High     |
| Healthcare Practitioners and Technical Occupations (29-0000) | Reuben et al., 2020 <sup>168</sup>  | n=10   | Emergency Medical Technicians and Paramedics | Cross-sectional survey | 05/28 - 07/15 | United States of America | 0%               | High     |

|                                                              |                                       |       |                                                 |                        |               |                            |        |          |
|--------------------------------------------------------------|---------------------------------------|-------|-------------------------------------------------|------------------------|---------------|----------------------------|--------|----------|
| Healthcare Practitioners and Technical Occupations (29-0000) | Saberian et al., 2020 <sup>169</sup>  | n=243 | Emergency Medical Technicians and Paramedics    | Cross-sectional survey | 03/20 - 05/20 | Iran (Islamic Republic of) | 41.56% | High     |
| Healthcare Practitioners and Technical Occupations (29-0000) | Self et al., 2020 <sup>154</sup>      | n=56  | Emergency Medical Technicians and Paramedics    | Cross-sectional survey | 04/03 - 06/19 | United States of America   | 5.36%  | Moderate |
| Healthcare Practitioners and Technical Occupations (29-0000) | Tarabichi et al., 2020 <sup>170</sup> | n=111 | Emergency Medical Technicians and Paramedics    | Cross-sectional survey | 04/20 - 05/19 | United States of America   | 5.41%  | High     |
| Healthcare Practitioners and Technical Occupations (29-0000) | Baracco et al., 2020 <sup>24</sup>    | n=188 | Health Technologists and Technicians, All Other | Cross-sectional survey | 04/23 - 05/05 | Italy                      | 13.8%  | High     |
| Healthcare Practitioners and Technical Occupations (29-0000) | Chau et al., 2020 <sup>126</sup>      | n=22  | Health Technologists and Technicians, All Other | Cross-sectional survey | 08/23 - 08/30 | Viet Nam                   | 0%     | High     |
| Healthcare Practitioners and Technical Occupations (29-0000) | Goenka et al., 2020 <sup>25</sup>     | n=99  | Health Technologists and Technicians, All Other | Cross-sectional survey | 07/12 - 08/23 | India                      | 12.12% | Moderate |
| Healthcare Practitioners and Technical Occupations (29-0000) | Goenka et al., 2020 <sup>26</sup>     | n=16  | Health Technologists and Technicians, All Other | Cross-sectional survey | 08/01 - 08/31 | India                      | 68.75% | High     |
| Healthcare Support                                           | Jeremias et al., 2020 <sup>70</sup>   | n=155 | Healthcare Support Occupations                  | Cross-sectional survey | 03/01 - 04/30 | United States of America   | 5.8%   | High     |

|                                          |                                          |       |                                             |                        |               |                          |                      |          |
|------------------------------------------|------------------------------------------|-------|---------------------------------------------|------------------------|---------------|--------------------------|----------------------|----------|
| Occupations (31-0000)                    |                                          |       |                                             |                        |               |                          |                      |          |
| Healthcare Support Occupations (31-0000) | Ward et al., 2020 <sup>113</sup>         | n=979 | Nursing, Psychiatric, and Home Health Aides | Cross-sectional survey | 09/15 - 09/28 | The United Kingdom       | 11.09% (8.96-13.59%) | Moderate |
| Healthcare Support Occupations (31-0000) | Ward et al., 2020 <sup>113</sup>         | n=257 | Nursing, Psychiatric, and Home Health Aides | Cross-sectional survey | 09/15 - 09/28 | The United Kingdom       | 8.95%                | Moderate |
| Healthcare Support Occupations (31-0000) | Vijh et al., 2020 <sup>171</sup>         | n=169 | Nursing, Psychiatric, and Home Health Aides | Cross-sectional survey | 05/04 - 05/14 | Canada                   | 26.63%               | High     |
| Healthcare Support Occupations (31-0000) | Akinbami et al., 2020 <sup>46</sup>      | n=641 | Nursing Assistants                          | Cross-sectional survey | 05/18 - 06/13 | United States of America | 12.8% (10.3-15.6%)   | Moderate |
| Healthcare Support Occupations (31-0000) | Bampoe et al., 2020 <sup>156</sup>       | n=108 | Nursing Assistants                          | Cross-sectional survey | 05/11 - 06/05 | The United Kingdom       | 15.7% (9.5-24%)      | High     |
| Healthcare Support Occupations (31-0000) | Baracco et al., 2020 <sup>24</sup>       | n=257 | Nursing Assistants                          | Cross-sectional survey | 04/23 - 05/05 | Italy                    | 22.2%                | High     |
| Healthcare Support Occupations (31-0000) | Barallat et al., 2020 <sup>50</sup>      | n=832 | Nursing Assistants                          | Cross-sectional survey | 05/04 - 05/22 | Spain                    | 13.94%               | High     |
| Healthcare Support Occupations (31-0000) | Bhattacharya et al., 2020 <sup>172</sup> | n=121 | Nursing Assistants                          | Cross-sectional survey | 06/01 - 06/15 | United States of America | 1.65%                | High     |
| Healthcare Support                       | Brousseau et al., 2020 <sup>134</sup>    | n=132 | Nursing Assistants                          | Cross-sectional survey | 07/06 - 09/24 | Canada                   | 16.7%                | High     |

|                                          |                                      |        |                    |                        |               |                          |        |          |
|------------------------------------------|--------------------------------------|--------|--------------------|------------------------|---------------|--------------------------|--------|----------|
| Occupations (31-0000)                    |                                      |        |                    |                        |               |                          |        |          |
| Healthcare Support Occupations (31-0000) | Brunner et al., 2020 <sup>54</sup>   | n=95   | Nursing Assistants | Cross-sectional survey | 05/04 - 05/29 | United States of America | 1.05%  | High     |
| Healthcare Support Occupations (31-0000) | Brzostek et al., 2020 <sup>151</sup> | n=570  | Nursing Assistants | Cross-sectional survey | 04/17 - 05/07 | United States of America | 39.5%  | Moderate |
| Healthcare Support Occupations (31-0000) | Brzostek et al., 2020 <sup>151</sup> | n=263  | Nursing Assistants | Cross-sectional survey | 04/17 - 05/07 | United States of America | 45.6%  | Moderate |
| Healthcare Support Occupations (31-0000) | Calcagno et al., 2020 <sup>124</sup> | n=476  | Nursing Assistants | Cross-sectional survey | 04/17 - 05/20 | Italy                    | 9.24%  | Moderate |
| Healthcare Support Occupations (31-0000) | Costa et al., 2020 <sup>128</sup>    | n=553  | Nursing Assistants | Cross-sectional survey | 05/14 - 05/28 | Brazil                   | 10.5%  | Moderate |
| Healthcare Support Occupations (31-0000) | Galan et al., 2020 <sup>20</sup>     | n=472  | Nursing Assistants | Cross-sectional survey | 04/14 - 04/27 | Spain                    | 33.26% | High     |
| Healthcare Support Occupations (31-0000) | Garcia et al., 2020 <sup>173</sup>   | n=2424 | Nursing Assistants | Cross-sectional survey | 05/01 - 05/30 | Spain                    | 22.4%  | High     |
| Healthcare Support Occupations (31-0000) | Garcia et al., 2020 <sup>174</sup>   | n=2424 | Nursing Assistants | Cross-sectional survey | 05/01 - 05/30 | Spain                    | 22.4%  | High     |
| Healthcare Support                       | Hanrath et al., 2020 <sup>32</sup>   | n=1434 | Nursing Assistants | Cross-sectional survey | 05/29 - 07/06 | The United Kingdom       | 11.44% | High     |

|                                          |                                       |        |                    |                        |               |                          |               |          |
|------------------------------------------|---------------------------------------|--------|--------------------|------------------------|---------------|--------------------------|---------------|----------|
| Occupations (31-0000)                    |                                       |        |                    |                        |               |                          |               |          |
| Healthcare Support Occupations (31-0000) | Iversen et al., 2020 <sup>8</sup>     | n=501  | Nursing Assistants | Cross-sectional survey | 04/15 - 04/22 | Denmark                  | 1.2%          | Low      |
| Healthcare Support Occupations (31-0000) | Khan et al., 2020 <sup>127</sup>      | n=624  | Nursing Assistants | Cross-sectional survey | 06/15 - 06/29 | India                    | 2.4% (1.5-4%) | Moderate |
| Healthcare Support Occupations (31-0000) | Mughal et al., 2020 <sup>175</sup>    | n=121  | Nursing Assistants | Cross-sectional survey | 05/14 - 05/19 | United States of America | 0.83%         | High     |
| Healthcare Support Occupations (31-0000) | Rao et al., 2020 <sup>176</sup>       | n=1000 | Nursing Assistants | Cross-sectional survey | 05/23 - 06/06 | India                    | 1%            | Unclear  |
| Healthcare Support Occupations (31-0000) | Rudberg et al., 2020 <sup>147</sup>   | n=428  | Nursing Assistants | Cross-sectional survey | 04/14 - 05/08 | Sweden                   | 25.5%         | Moderate |
| Healthcare Support Occupations (31-0000) | Siddiqui et al., 2020 <sup>2</sup>    | n=28   | Nursing Assistants | Prospective cohort     | 04/15 - 08/15 | India                    | 10.7%         | High     |
| Healthcare Support Occupations (31-0000) | Yogo et al., 2020 <sup>36</sup>       | n=154  | Nursing Assistants | Cross-sectional survey | 05/20 - 06/08 | United States of America | 3.24%         | High     |
| Healthcare Support Occupations (31-0000) | Brousseau et al., 2020 <sup>134</sup> | n=201  | Orderlies          | Cross-sectional survey | 07/06 - 09/24 | Canada                   | 17.9%         | High     |
| Healthcare Support                       | Kassem et al., 2020 <sup>72</sup>     | n=9    | Orderlies          | Cross-sectional survey | 06/01 - 06/14 | Egypt                    | 0%            | High     |

|                                          |                                    |        |                                       |                        |               |                          |        |          |
|------------------------------------------|------------------------------------|--------|---------------------------------------|------------------------|---------------|--------------------------|--------|----------|
| Occupations (31-0000)                    |                                    |        |                                       |                        |               |                          |        |          |
| Healthcare Support Occupations (31-0000) | Kassem et al., 2020 <sup>72</sup>  | n=9    | Orderlies                             | Cross-sectional survey | 06/01 - 06/14 | Egypt                    | 33.33% | High     |
| Healthcare Support Occupations (31-0000) | Kassem et al., 2020 <sup>72</sup>  | n=9    | Orderlies                             | Cross-sectional survey | 06/01 - 06/14 | Egypt                    | 11.11% | High     |
| Healthcare Support Occupations (31-0000) | Kassem et al., 2020 <sup>72</sup>  | n=9    | Orderlies                             | Cross-sectional survey | 06/01 - 06/14 | Egypt                    | 22.22% | High     |
| Healthcare Support Occupations (31-0000) | Hanrath et al., 2020 <sup>32</sup> | n=122  | Orderlies                             | Cross-sectional survey | 05/29 - 07/06 | The United Kingdom       | 9.02%  | High     |
| Healthcare Support Occupations (31-0000) | Lumley et al., 2020 <sup>9</sup>   | n=377  | Orderlies                             | Prospective cohort     | 04/23 - 11/30 | The United Kingdom       | 15.38% | Moderate |
| Healthcare Support Occupations (31-0000) | Rosser et al., 2020 <sup>33</sup>  | n=3959 | Medical Assistants                    | Cross-sectional survey | 04/20 - 05/20 | United States of America | 1.39%  | High     |
| Healthcare Support Occupations (31-0000) | Yogo et al., 2020 <sup>36</sup>    | n=106  | Phlebotomists                         | Cross-sectional survey | 05/20 - 06/08 | United States of America | 0%     | High     |
| Healthcare Support Occupations (31-0000) | Cavlek et al., 2020 <sup>56</sup>  | n=300  | Healthcare Support Workers, All Other | Cross-sectional survey | 04/25 - 05/24 | Croatia                  | 0.67%  | High     |
| Healthcare Support                       | Erber et al., 2020 <sup>31</sup>   | n=383  | Healthcare Support Workers, All Other | Cross-sectional survey | 04/14 - 05/29 | Germany                  | 2.34%  | High     |



|                                          |                                       |        |                                                                |                        |               |                          |                 |          |
|------------------------------------------|---------------------------------------|--------|----------------------------------------------------------------|------------------------|---------------|--------------------------|-----------------|----------|
| Occupations (31-0000)                    |                                       |        |                                                                |                        |               |                          |                 |          |
| Healthcare Support Occupations (31-0000) | Khan et al., 2020 <sup>127</sup>      | n=141  | Healthcare Support Workers, All Other                          | Cross-sectional survey | 06/15 - 06/29 | India                    | 0%              | Moderate |
| Protective Service Occupations (33-0000) | Shukla et al., 2020 <sup>177</sup>    | n=1713 | Protective Service Occupations                                 | Cross-sectional survey | 04/24 - 05/21 | United States of America | 1.46%           | Moderate |
| Protective Service Occupations (33-0000) | Martinez et al., 2020 <sup>121</sup>  | n=18   | First-Line Supervisors of Fire Fighting and Prevention Workers | Cross-sectional survey | 04/16 - 04/17 | United States of America | 0%              | High     |
| Protective Service Occupations (33-0000) | Martinez et al., 2020 <sup>121</sup>  | n=47   | First-Line Supervisors of Fire Fighting and Prevention Workers | Cross-sectional survey | 04/16 - 04/17 | United States of America | 14.89%          | High     |
| Protective Service Occupations (33-0000) | Martinez et al., 2020 <sup>121</sup>  | n=13   | First-Line Supervisors of Fire Fighting and Prevention Workers | Cross-sectional survey | 04/16 - 04/17 | United States of America | 7.69%           | High     |
| Protective Service Occupations (33-0000) | Akinbami et al., 2020 <sup>46</sup>   | n=330  | Firefighters                                                   | Cross-sectional survey | 05/18 - 06/13 | United States of America | 6.7% (4.2-9.9%) | Moderate |
| Protective Service Occupations (33-0000) | Gray et al., 2020 <sup>178</sup>      | n=132  | Firefighters                                                   | Cross-sectional survey | 05/01 - 05/31 | United States of America | 14%             | High     |
| Protective Service Occupations (33-0000) | Reuben et al., 2020 <sup>168</sup>    | n=62   | Firefighters                                                   | Cross-sectional survey | 05/28 - 07/15 | United States of America | 4.84%           | High     |
| Protective Service Occupations (33-0000) | Sabourin et al., 2020 <sup>35</sup>   | n=42   | Firefighters                                                   | Cross-sectional survey | 07/15 - 08/15 | United States of America | 2.38%           | High     |
| Protective Service Occupations (33-0000) | Tarabichi et al., 2020 <sup>170</sup> | n=185  | Firefighters                                                   | Cross-sectional survey | 04/20 - 05/19 | United States of America | 5.41%           | High     |

|                                          |                                      |        |                                      |                        |               |                          |               |          |
|------------------------------------------|--------------------------------------|--------|--------------------------------------|------------------------|---------------|--------------------------|---------------|----------|
| Protective Service Occupations (33-0000) | Martinez et al., 2020 <sup>121</sup> | n=7    | Fire Inspectors and Investigators    | Cross-sectional survey | 04/16 - 04/17 | United States of America | 14.29%        | High     |
| Protective Service Occupations (33-0000) | Akinbami et al., 2020 <sup>46</sup>  | n=785  | Police and Sheriff's Patrol Officers | Cross-sectional survey | 05/18 - 06/13 | United States of America | 4% (2.7-5.6%) | Moderate |
| Protective Service Occupations (33-0000) | Chughtai et al., 2020 <sup>179</sup> | n=154  | Police and Sheriff's Patrol Officers | Cross-sectional survey | 05/20 - 05/30 | Pakistan                 | 15.6%         | High     |
| Protective Service Occupations (33-0000) | Gudo et al., 2020 <sup>65</sup>      | n=564  | Police and Sheriff's Patrol Officers | Cross-sectional survey | 06/17 - 06/30 | Mozambique               | 6% (4-8%)     | High     |
| Protective Service Occupations (33-0000) | Gujski et al., 2020 <sup>180</sup>   | n=4026 | Police and Sheriff's Patrol Officers | Cross-sectional survey | 06/22 - 07/08 | Poland                   | 4.2%          | Moderate |
| Protective Service Occupations (33-0000) | Halatoko et al., 2020 <sup>41</sup>  | n=196  | Police and Sheriff's Patrol Officers | Cross-sectional survey | 04/23 - 05/08 | Togo                     | 0%            | High     |
| Protective Service Occupations (33-0000) | Langa et al., 2020 <sup>181</sup>    | n=471  | Police and Sheriff's Patrol Officers | Cross-sectional survey | 09/28 - 10/09 | Mozambique               | 1.5%          | High     |
| Protective Service Occupations (33-0000) | Macicame et al., 2020 <sup>182</sup> | n=456  | Police and Sheriff's Patrol Officers | Cross-sectional survey | 09/14 - 09/30 | Mozambique               | 4.39%         | High     |
| Protective Service Occupations (33-0000) | Mahomed et al., 2020 <sup>81</sup>   | n=554  | Police and Sheriff's Patrol Officers | Cross-sectional survey | 08/31 - 10/12 | Mozambique               | 2.9%          | High     |
| Protective Service Occupations (33-0000) | Reuben et al., 2020 <sup>168</sup>   | n=220  | Police and Sheriff's Patrol Officers | Cross-sectional survey | 05/28 - 07/15 | United States of America | 3.64%         | High     |
| Protective Service Occupations (33-0000) | Sabourin et al., 2020 <sup>35</sup>  | n=125  | Police and Sheriff's Patrol Officers | Cross-sectional survey | 07/15 - 08/15 | United States of America | 4%            | High     |

|                                                            |                                     |         |                                                  |                        |               |                          |       |          |
|------------------------------------------------------------|-------------------------------------|---------|--------------------------------------------------|------------------------|---------------|--------------------------|-------|----------|
| Protective Service Occupations (33-0000)                   | Shukla et al., 2020 <sup>177</sup>  | n=1643  | Police and Sheriff's Patrol Officers             | Cross-sectional survey | 04/24 - 05/21 | United States of America | 1.52% | Moderate |
| Protective Service Occupations (33-0000)                   | Siddiqui et al., 2020 <sup>2</sup>  | n=27    | Police and Sheriff's Patrol Officers             | Prospective cohort     | 04/15 - 08/15 | India                    | 7.4%  | High     |
| Protective Service Occupations (33-0000)                   | Viegas et al., 2020 <sup>110</sup>  | n=559   | Police and Sheriff's Patrol Officers             | Cross-sectional survey | 08/03 - 08/21 | Mozambique               | 3.94% | High     |
| Protective Service Occupations (33-0000)                   | Denyer et al., 2020 <sup>60</sup>   | n=38216 | Security Guards                                  | Cross-sectional survey | 05/12 - 05/18 | Japan                    | 0.23% | Unclear  |
| Protective Service Occupations (33-0000)                   | Mahumane et al., 2020 <sup>82</sup> | n=407   | Security Guards                                  | Cross-sectional survey | 11/02 - 11/17 | Mozambique               | 4.9%  | High     |
| Protective Service Occupations (33-0000)                   | Siddiqui et al., 2020 <sup>2</sup>  | n=9     | Security Guards                                  | Prospective cohort     | 04/15 - 08/15 | India                    | 0%    | High     |
| Protective Service Occupations (33-0000)                   | Silva et al., 2020 <sup>34</sup>    | n=32    | Security Guards                                  | Cross-sectional survey | 06/05 - 07/31 | Brazil                   | 34%   | High     |
| Protective Service Occupations (33-0000)                   | Thani et al., 2020 <sup>183</sup>   | n=61    | Security Guards                                  | Cross-sectional survey | 07/26 - 09/09 | Qatar                    | 60.1% | Moderate |
| Food Preparation and Serving Related Occupations (35-0000) | Thani et al., 2020 <sup>183</sup>   | n=93    | Food Preparation and Serving Related Occupations | Cross-sectional survey | 07/26 - 09/09 | Qatar                    | 29.2% | Moderate |
| Food Preparation and Serving Related Occupations (35-0000) | Siddiqui et al., 2020 <sup>2</sup>  | n=8     | Cooks, All Other                                 | Prospective cohort     | 04/15 - 08/15 | India                    | 37.5% | High     |
| Food Preparation and Serving                               | Brunner et al., 2020 <sup>54</sup>  | n=8     | Food Preparation Workers                         | Cross-sectional survey | 05/04 - 05/29 | United States of America | 0%    | High     |

|                                                                     |                                       |       |                                                           |                                                                                   |               |                          |       |          |
|---------------------------------------------------------------------|---------------------------------------|-------|-----------------------------------------------------------|-----------------------------------------------------------------------------------|---------------|--------------------------|-------|----------|
| Related Occupations (35-0000)                                       |                                       |       |                                                           |                                                                                   |               |                          |       |          |
| Healthcare Support Occupations (31-0000)                            | Rosser et al., 2020 <sup>33</sup>     | n=335 | Healthcare Support Occupations                            | Cross-sectional survey                                                            | 04/20 - 05/20 | United States of America | 3.58% | High     |
| Food Preparation and Serving Related Occupations (35-0000)          | Biggs et al., 2020 <sup>3</sup>       | n=24  | Food Servers, Nonrestaurant                               | Cross-sectional survey                                                            | 04/28 - 05/03 | United States of America | 4.17% | Moderate |
| Food Preparation and Serving Related Occupations (35-0000)          | Leidner et al., 2020 <sup>22</sup>    | n=113 | Food Servers, Nonrestaurant                               | Cross sectional study with prospective cohort follow up of a subset of the sample | 04/08 - 05/22 | United States of America | 1.77% | High     |
| Food Preparation and Serving Related Occupations (35-0000)          | Hanrath et al., 2020 <sup>32</sup>    | n=340 | Other Food Preparation and Serving Related Workers        | Cross-sectional survey                                                            | 05/29 - 07/06 | The United Kingdom       | 8.53% | High     |
| Building and Grounds Cleaning and Maintenance Occupations (37-0000) | Martin et al., 2020 <sup>23</sup>     | n=528 | Building and Grounds Cleaning and Maintenance Occupations | Cross-sectional survey                                                            | 05/29 - 07/13 | The United Kingdom       | 8.14% | Moderate |
| Building and Grounds Cleaning and Maintenance Occupations (37-0000) | Brousseau et al., 2020 <sup>134</sup> | n=102 | Building Cleaning and Pest Control Workers                | Cross-sectional survey                                                            | 07/06 - 09/24 | Canada                   | 10.8% | High     |
| Building and Grounds Cleaning and Maintenance                       | Chau et al., 2020 <sup>126</sup>      | n=42  | Building Cleaning and Pest Control Workers                | Cross-sectional survey                                                            | 08/23 - 08/30 | Viet Nam                 | 0%    | High     |

|                                                                     |                                          |       |                                                               |                        |               |                          |        |          |
|---------------------------------------------------------------------|------------------------------------------|-------|---------------------------------------------------------------|------------------------|---------------|--------------------------|--------|----------|
| Occupations (37-0000)                                               |                                          |       |                                                               |                        |               |                          |        |          |
| Building and Grounds Cleaning and Maintenance Occupations (37-0000) | Finkenzeller et al., 2020 <sup>158</sup> | n=57  | Building Cleaning and Pest Control Workers                    | Prospective cohort     | 06/29 - 07/29 | Germany                  | 19.3%  | Moderate |
| Building and Grounds Cleaning and Maintenance Occupations (37-0000) | Chau et al., 2020 <sup>126</sup>         | n=6   | Janitors and Cleaners, Except Maids and Housekeeping Cleaners | Cross-sectional survey | 08/23 - 08/30 | Viet Nam                 | 0%     | High     |
| Building and Grounds Cleaning and Maintenance Occupations (37-0000) | Epstude et al., 2020 <sup>184</sup>      | n=45  | Janitors and Cleaners, Except Maids and Housekeeping Cleaners | Cross-sectional survey | 06/15 - 06/30 | Germany                  | 0%     | High     |
| Building and Grounds Cleaning and Maintenance Occupations (37-0000) | Thani et al., 2020 <sup>183</sup>        | n=105 | Janitors and Cleaners, Except Maids and Housekeeping Cleaners | Cross-sectional survey | 07/26 - 09/09 | Qatar                    | 54.5%  | Moderate |
| Building and Grounds Cleaning and Maintenance Occupations (37-0000) | Brunner et al., 2020 <sup>54</sup>       | n=23  | Maids and Housekeeping Cleaners                               | Cross-sectional survey | 05/04 - 05/29 | United States of America | 0%     | High     |
| Building and Grounds Cleaning and Maintenance Occupations (37-0000) | Goenka et al., 2020 <sup>25</sup>        | n=226 | Maids and Housekeeping Cleaners                               | Cross-sectional survey | 07/12 - 08/23 | India                    | 26.11% | Moderate |
| Building and Grounds Cleaning and Maintenance Occupations (37-0000) | Goenka et al., 2020 <sup>26</sup>        | n=10  | Maids and Housekeeping Cleaners                               | Cross-sectional survey | 08/01 - 08/31 | India                    | 10%    | High     |

|                                                                     |                                    |        |                                 |                                                                                   |               |                            |                  |          |
|---------------------------------------------------------------------|------------------------------------|--------|---------------------------------|-----------------------------------------------------------------------------------|---------------|----------------------------|------------------|----------|
| Building and Grounds Cleaning and Maintenance Occupations (37-0000) | Hanrath et al., 2020 <sup>32</sup> | n=515  | Maids and Housekeeping Cleaners | Cross-sectional survey                                                            | 05/29 - 07/06 | The United Kingdom         | 13.2%            | High     |
| Building and Grounds Cleaning and Maintenance Occupations (37-0000) | Khan et al., 2020 <sup>127</sup>   | n=276  | Maids and Housekeeping Cleaners | Cross-sectional survey                                                            | 06/15 - 06/29 | India                      | 3.3% (1.7-6.2%)  | Moderate |
| Building and Grounds Cleaning and Maintenance Occupations (37-0000) | Leidner et al., 2020 <sup>22</sup> | n=137  | Maids and Housekeeping Cleaners | Cross sectional study with prospective cohort follow up of a subset of the sample | 04/08 - 05/22 | United States of America   | 8.03%            | High     |
| Building and Grounds Cleaning and Maintenance Occupations (37-0000) | Moscola et al., 2020 <sup>89</sup> | n=7314 | Maids and Housekeeping Cleaners | Cross-sectional survey                                                            | 04/20 - 06/23 | United States of America   | 20.9%            | High     |
| Building and Grounds Cleaning and Maintenance Occupations (37-0000) | Shakiba et al., 2020 <sup>10</sup> | n=159  | Maids and Housekeeping Cleaners | Cross-sectional survey                                                            | 04/11 - 04/19 | Iran (Islamic Republic of) | 25% (13.6-37.5%) | Moderate |
| Building and Grounds Cleaning and Maintenance Occupations (37-0000) | Shields et al., 2020 <sup>97</sup> | n=29   | Maids and Housekeeping Cleaners | Cross-sectional survey                                                            | 04/24 - 04/25 | The United Kingdom         | 34.5%            | High     |
| Building and Grounds Cleaning and Maintenance Occupations (37-0000) | Siddiqui et al., 2020 <sup>2</sup> | n=46   | Maids and Housekeeping Cleaners | Prospective cohort                                                                | 04/15 - 08/15 | India                      | 21.7%            | High     |

|                                                 |                                     |       |                                                |                        |               |                          |                    |          |
|-------------------------------------------------|-------------------------------------|-------|------------------------------------------------|------------------------|---------------|--------------------------|--------------------|----------|
| Personal Care and Service Occupations (39-0000) | Biggs et al., 2020 <sup>3</sup>     | n=10  | Hairdressers, Hairstylists, and Cosmetologists | Cross-sectional survey | 04/28 - 05/03 | United States of America | 10%                | Moderate |
| Personal Care and Service Occupations (39-0000) | Biggs et al., 2020 <sup>3</sup>     | n=48  | Childcare Workers                              | Cross-sectional survey | 04/28 - 05/03 | United States of America | 0%                 | Moderate |
| Personal Care and Service Occupations (39-0000) | Chen et al., 2020 <sup>135</sup>    | n=11  | Personal Care Aides                            | Cross-sectional survey | 02/19 - 02/19 | China                    | 9.09%              | High     |
| Personal Care and Service Occupations (39-0000) | Galan et al., 2020 <sup>20</sup>    | n=337 | Personal Care Aides                            | Cross-sectional survey | 04/14 - 04/27 | Spain                    | 27.89%             | High     |
| Personal Care and Service Occupations (39-0000) | Galan et al., 2020 <sup>20</sup>    | n=168 | Personal Care Aides                            | Cross-sectional survey | 04/14 - 04/27 | Spain                    | 27.38%             | High     |
| Personal Care and Service Occupations (39-0000) | Godbout et al., 2020 <sup>138</sup> | n=86  | Personal Care Aides                            | Cross-sectional survey | 07/27 - 10/02 | United States of America | 2.32%              | High     |
| Personal Care and Service Occupations (39-0000) | Hassan et al., 2020 <sup>185</sup>  | n=403 | Personal Care Aides                            | Cross-sectional survey | 05/11 - 06/17 | Sweden                   | 20.1%              | High     |
| Personal Care and Service Occupations (39-0000) | Kumar et al., 2020 <sup>142</sup>   | n=292 | Personal Care Aides                            | Cross-sectional survey | 06/01 - 06/30 | India                    | 18.5% (14.5-23.3%) | High     |
| Personal Care and Service Occupations (39-0000) | Ladhani et al., 2020 <sup>186</sup> | n=208 | Personal Care Aides                            | Prospective cohort     | 04/10 - 04/13 | The United Kingdom       | 75% (68.7-80.4%)   | High     |

|                                                 |                                       |        |                               |                        |               |                          |                    |          |
|-------------------------------------------------|---------------------------------------|--------|-------------------------------|------------------------|---------------|--------------------------|--------------------|----------|
| Personal Care and Service Occupations (39-0000) | Lindahl et al., 2020 <sup>187</sup>   | n=1005 | Personal Care Aides           | Cross-sectional survey | 04/01 - 04/20 | Sweden                   | 22.9% (20.4-25.7%) | High     |
| Personal Care and Service Occupations (39-0000) | Regan et al., 2020 <sup>188</sup>     | n=305  | Personal Care Aides           | Cross-sectional survey | 04/15 - 05/06 | United States of America | 23.6%              | Unclear  |
| Personal Care and Service Occupations (39-0000) | Siddiqui et al., 2020 <sup>2</sup>    | n=5    | Personal Care Aides           | Prospective cohort     | 04/15 - 08/15 | India                    | 40%                | High     |
| Personal Care and Service Occupations (39-0000) | Venugopal et al., 2020 <sup>150</sup> | n=72   | Personal Care Aides           | Cross-sectional survey | 03/01 - 05/01 | United States of America | 28%                | Moderate |
| Personal Care and Service Occupations (39-0000) | Viegas et al., 2020 <sup>110</sup>    | n=85   | Personal Care Aides           | Cross-sectional survey | 08/03 - 08/21 | Mozambique               | 1.18%              | High     |
| Sales and Related Occupations (41-0000)         | Arnaldo et al., 2020 <sup>13</sup>    | n=928  | Sales and Related Occupations | Cross-sectional survey | 07/06 - 07/13 | Mozambique               | 6.5%               | High     |
| Sales and Related Occupations (41-0000)         | Arnaldo et al., 2020 <sup>48</sup>    | n=1123 | Sales and Related Occupations | Cross-sectional survey | 08/10 - 08/21 | Mozambique               | 1.6%               | High     |
| Sales and Related Occupations (41-0000)         | Langa et al., 2020 <sup>181</sup>     | n=871  | Sales and Related Occupations | Cross-sectional survey | 09/28 - 10/09 | Mozambique               | 0.2%               | High     |
| Sales and Related Occupations (41-0000)         | Mabunda et al., 2020 <sup>15</sup>    | n=1585 | Sales and Related Occupations | Cross-sectional survey | 09/21 - 10/02 | Mozambique               | 8.3%               | High     |
| Sales and Related Occupations (41-0000)         | Macicame et al., 2020 <sup>182</sup>  | n=1288 | Sales and Related Occupations | Cross-sectional survey | 09/14 - 09/30 | Mozambique               | 4.97%              | High     |



|                                         |                                     |         |                               |                        |               |                            |                    |          |
|-----------------------------------------|-------------------------------------|---------|-------------------------------|------------------------|---------------|----------------------------|--------------------|----------|
| Sales and Related Occupations (41-0000) | Mahomed et al., 2020 <sup>81</sup>  | n=1556  | Sales and Related Occupations | Cross-sectional survey | 08/31 - 10/12 | Mozambique                 | 0.8%               | High     |
| Sales and Related Occupations (41-0000) | Mahumane et al., 2020 <sup>82</sup> | n=643   | Sales and Related Occupations | Cross-sectional survey | 11/02 - 11/17 | Mozambique                 | 1.9%               | High     |
| Sales and Related Occupations (41-0000) | Arnaldo et al., 2020 <sup>14</sup>  | n=472   | Sales and Related Occupations | Cross-sectional survey | 11/16 - 11/21 | Mozambique                 | 6.8%               | High     |
| Sales and Related Occupations (41-0000) | Arnaldo et al., 2020 <sup>14</sup>  | n=460   | Sales and Related Occupations | Cross-sectional survey | 11/02 - 11/12 | Mozambique                 | 5.9%               | High     |
| Sales and Related Occupations (41-0000) | Mahomed et al., 2020 <sup>16</sup>  | n=517   | Sales and Related Occupations | Cross-sectional survey | 11/26 - 12/03 | Mozambique                 | 8.9%               | High     |
| Sales and Related Occupations (41-0000) | Mahomed et al., 2020 <sup>16</sup>  | n=1001  | Sales and Related Occupations | Cross-sectional survey | 11/07 - 11/21 | Mozambique                 | 4.5%               | High     |
| Sales and Related Occupations (41-0000) | Biggs et al., 2020 <sup>3</sup>     | n=19    | Retail Sales Workers          | Cross-sectional survey | 04/28 - 05/03 | United States of America   | 0%                 | Moderate |
| Sales and Related Occupations (41-0000) | Poustchi et al., 2020 <sup>28</sup> | n=753   | Cashiers                      | Cross-sectional survey | 04/17 - 06/02 | Iran (Islamic Republic of) | 16.1% (12.9-19.2%) | Moderate |
| Sales and Related Occupations (41-0000) | Alali et al., 2020 <sup>189</sup>   | n=525   | Cashiers                      | Cross-sectional survey | 05/23 - 06/26 | Kuwait                     | 38.1% (34-42.3%)   | High     |
| Sales and Related Occupations (41-0000) | Denyer et al., 2020 <sup>60</sup>   | n=19075 | Retail Salespersons           | Cross-sectional survey | 05/12 - 05/18 | Japan                      | 0.04%              | Unclear  |
| Sales and Related Occupations (41-0000) | Kern et al., 2020 <sup>73</sup>     | n=300   | Retail Salespersons           | Cross-sectional survey | 04/09 - 04/16 | Germany                    | 0.33% (0.01-1.84%) | High     |

|                                                         |                                      |        |                                                                                              |                        |               |                            |                  |          |
|---------------------------------------------------------|--------------------------------------|--------|----------------------------------------------------------------------------------------------|------------------------|---------------|----------------------------|------------------|----------|
| Sales and Related Occupations (41-0000)                 | Khan et al., 2020 <sup>45</sup>      | n=132  | Retail Salespersons                                                                          | Cross-sectional survey | 07/01 - 07/15 | India                      | 5.3% (2.5-10.7%) | Moderate |
| Sales and Related Occupations (41-0000)                 | Thani et al., 2020 <sup>183</sup>    | n=171  | Retail Salespersons                                                                          | Cross-sectional survey | 07/26 - 09/09 | Qatar                      | 40.3%            | Moderate |
| Sales and Related Occupations (41-0000)                 | Siddiqui et al., 2020 <sup>2</sup>   | n=4    | Sales Representatives, Wholesale and Manufacturing, Except Technical and Scientific Products | Prospective cohort     | 04/15 - 08/15 | India                      | 25%              | High     |
| Sales and Related Occupations (41-0000)                 | Biggs et al., 2020 <sup>3</sup>      | n=34   | Real Estate Sales Agents                                                                     | Cross-sectional survey | 04/28 - 05/03 | United States of America   | 0%               | Moderate |
| Sales and Related Occupations (41-0000)                 | Gudo et al., 2020 <sup>65</sup>      | n=1493 | Door-to-Door Sales Workers, News and Street Vendors, and Related Workers                     | Cross-sectional survey | 06/17 - 06/30 | Mozambique                 | 10% (8-11%)      | High     |
| Sales and Related Occupations (41-0000)                 | Viegas et al., 2020 <sup>110</sup>   | n=1246 | Door-to-Door Sales Workers, News and Street Vendors, and Related Workers                     | Cross-sectional survey | 08/03 - 08/21 | Mozambique                 | 5.22%            | High     |
| Sales and Related Occupations (41-0000)                 | Shakiba et al., 2020 <sup>10</sup>   | n=46   | Sales and Related Workers, All Other                                                         | Cross-sectional survey | 04/11 - 04/19 | Iran (Islamic Republic of) | 8.7% (0.8-20%)   | Moderate |
| Office and Administrative Support Occupations (43-0000) | Calcagno et al., 2020 <sup>124</sup> | n=539  | Office and Administrative Support Occupations                                                | Cross-sectional survey | 04/17 - 05/20 | Italy                      | 3.34%            | Moderate |
| Office and Administrative Support Occupations (43-0000) | Costa et al., 2020 <sup>128</sup>    | n=120  | Office and Administrative Support Occupations                                                | Cross-sectional survey | 05/14 - 05/28 | Brazil                     | 14.2%            | Moderate |

|                                                         |                                        |        |                                               |                        |               |                          |                   |          |
|---------------------------------------------------------|----------------------------------------|--------|-----------------------------------------------|------------------------|---------------|--------------------------|-------------------|----------|
| Office and Administrative Support Occupations (43-0000) | Rosser et al., 2020 <sup>33</sup>      | n=972  | Office and Administrative Support Occupations | Cross-sectional survey | 04/20 - 05/20 | United States of America | 1.34%             | High     |
| Office and Administrative Support Occupations (43-0000) | Tsitsilonis et al., 2020 <sup>12</sup> | n=504  | Office and Administrative Support Occupations | Cross-sectional survey | 06/15 - 07/15 | Greece                   | 0.48% (0-2.37%)   | Moderate |
| Office and Administrative Support Occupations (43-0000) | Khan et al., 2020 <sup>45</sup>        | n=37   | Hotel, Motel, and Resort Desk Clerks          | Cross-sectional survey | 07/01 - 07/15 | India                    | 10.8% (4.1-25.5%) | Moderate |
| Office and Administrative Support Occupations (43-0000) | Brunner et al., 2020 <sup>54</sup>     | n=26   | Receptionists and Information Clerks          | Cross-sectional survey | 05/04 - 05/29 | United States of America | 0%                | High     |
| Office and Administrative Support Occupations (43-0000) | Favara et al., 2020 <sup>136</sup>     | n=10   | Receptionists and Information Clerks          | Prospective cohort     | 06/01 - 06/07 | The United Kingdom       | 0%                | High     |
| Office and Administrative Support Occupations (43-0000) | Moscola et al., 2020 <sup>89</sup>     | n=9645 | Receptionists and Information Clerks          | Cross-sectional survey | 04/20 - 06/23 | United States of America | 12.6%             | High     |
| Office and Administrative Support Occupations (43-0000) | Biggs et al., 2020 <sup>3</sup>        | n=11   | Shipping, Receiving, and Traffic Clerks       | Cross-sectional survey | 04/28 - 05/03 | United States of America | 18.18%            | Moderate |
| Office and Administrative                               | Silva et al., 2020 <sup>34</sup>       | n=82   | Stock Clerks and Order Fillers                | Cross-sectional survey | 06/05 - 07/31 | Brazil                   | 4.88%             | High     |

|                                                         |                                     |        |                                                               |                        |               |                          |                 |          |
|---------------------------------------------------------|-------------------------------------|--------|---------------------------------------------------------------|------------------------|---------------|--------------------------|-----------------|----------|
| Support Occupations (43-0000)                           |                                     |        |                                                               |                        |               |                          |                 |          |
| Office and Administrative Support Occupations (43-0000) | Khan et al., 2020 <sup>45</sup>     | n=186  | Secretaries and Administrative Assistants                     | Cross-sectional survey | 07/01 - 07/15 | India                    | 3.8% (1.8-7.7%) | Moderate |
| Office and Administrative Support Occupations (43-0000) | Alemu et al., 2020 <sup>6</sup>     | n=48   | Executive Secretaries and Executive Administrative Assistants | Cross-sectional survey | 04/23 - 04/28 | Ethiopia                 | 2.1%            | Moderate |
| Office and Administrative Support Occupations (43-0000) | Barallat et al., 2020 <sup>50</sup> | n=1181 | Executive Secretaries and Executive Administrative Assistants | Cross-sectional survey | 05/04 - 05/22 | Spain                    | 6.52%           | High     |
| Office and Administrative Support Occupations (43-0000) | Lumley et al., 2020 <sup>9</sup>    | n=1557 | Executive Secretaries and Executive Administrative Assistants | Prospective cohort     | 04/23 - 11/30 | The United Kingdom       | 6.74%           | Moderate |
| Office and Administrative Support Occupations (43-0000) | Reuben et al., 2020 <sup>168</sup>  | n=18   | Executive Secretaries and Executive Administrative Assistants | Cross-sectional survey | 05/28 - 07/15 | United States of America | 0%              | High     |
| Office and Administrative Support Occupations (43-0000) | Akinbami et al., 2020 <sup>46</sup> | n=964  | Medical Secretaries                                           | Cross-sectional survey | 05/18 - 06/13 | United States of America | 8% (6.4-9.9%)   | Moderate |
| Office and Administrative Support                       | Alharbi et al., 2020 <sup>125</sup> | n=8    | Medical Secretaries                                           | Cross-sectional survey | 04/18 - 06/17 | Saudi Arabia             | 25%             | High     |

|                                                         |                                          |        |                     |                                                              |               |                          |       |          |
|---------------------------------------------------------|------------------------------------------|--------|---------------------|--------------------------------------------------------------|---------------|--------------------------|-------|----------|
| Occupations (43-0000)                                   |                                          |        |                     |                                                              |               |                          |       |          |
| Office and Administrative Support Occupations (43-0000) | Dimcheff et al., 2020 <sup>157</sup>     | n=357  | Medical Secretaries | Cross-sectional survey                                       | 06/08 - 07/08 | United States of America | 4.2%  | Moderate |
| Office and Administrative Support Occupations (43-0000) | Erber et al., 2020 <sup>31</sup>         | n=557  | Medical Secretaries | Cross-sectional survey                                       | 04/14 - 05/29 | Germany                  | 3.78% | High     |
| Office and Administrative Support Occupations (43-0000) | Finkenzeller et al., 2020 <sup>158</sup> | n=240  | Medical Secretaries | Prospective cohort                                           | 06/29 - 07/29 | Germany                  | 7.1%  | Moderate |
| Office and Administrative Support Occupations (43-0000) | Goenka et al., 2020 <sup>25</sup>        | n=75   | Medical Secretaries | Cross-sectional survey                                       | 07/12 - 08/23 | India                    | 8%    | Moderate |
| Office and Administrative Support Occupations (43-0000) | Goenka et al., 2020 <sup>25</sup>        | n=75   | Medical Secretaries | Cross-sectional survey                                       | 07/12 - 08/23 | India                    | 8%    | Moderate |
| Office and Administrative Support Occupations (43-0000) | Iversen et al., 2020 <sup>8</sup>        | n=2631 | Medical Secretaries | Cross-sectional survey                                       | 04/15 - 04/22 | Denmark                  | 2.7%  | Low      |
| Office and Administrative Support Occupations (43-0000) | Leidner et al., 2020 <sup>22</sup>       | n=793  | Medical Secretaries | Cross sectional study with prospective cohort follow up of a | 04/08 - 05/22 | United States of America | 3.15% | High     |

|                                                         |                                    |        |                        | subset of the sample   |               |                    |                |          |
|---------------------------------------------------------|------------------------------------|--------|------------------------|------------------------|---------------|--------------------|----------------|----------|
| Office and Administrative Support Occupations (43-0000) | Mesnil et al., 2020 <sup>143</sup> | n=184  | Medical Secretaries    | Cross-sectional survey | 06/08 - 06/22 | France             | 14.13%         | High     |
| Office and Administrative Support Occupations (43-0000) | Nishida et al., 2020 <sup>90</sup> | n=98   | Medical Secretaries    | Cross-sectional survey | 06/12 - 06/19 | Japan              | 1% (0.18-5.6%) | Moderate |
| Office and Administrative Support Occupations (43-0000) | Noor et al., 2020 <sup>130</sup>   | n=91   | Medical Secretaries    | Cross-sectional survey | 07/13 - 07/15 | Pakistan           | 43.96%         | Moderate |
| Office and Administrative Support Occupations (43-0000) | Thani et al., 2020 <sup>183</sup>  | n=82   | Medical Secretaries    | Cross-sectional survey | 07/26 - 09/09 | Qatar              | 31.6%          | Moderate |
| Office and Administrative Support Occupations (43-0000) | Zhou et al., 2020 <sup>166</sup>   | n=505  | Medical Secretaries    | Cross-sectional survey | 03/16 - 03/25 | China              | 1.39%          | Moderate |
| Office and Administrative Support Occupations (43-0000) | Chau et al., 2020 <sup>126</sup>   | n=20   | Data Entry Keyers      | Cross-sectional survey | 08/23 - 08/30 | Viet Nam           | 0%             | High     |
| Office and Administrative Support Occupations (43-0000) | Jones et al., 2020 <sup>29</sup>   | n=1233 | Office Clerks, General | Cross-sectional survey | 01/15 - 06/15 | The United Kingdom | 6.1%           | High     |

|                                                         |                                      |       |                                                      |                        |               |                          |        |          |
|---------------------------------------------------------|--------------------------------------|-------|------------------------------------------------------|------------------------|---------------|--------------------------|--------|----------|
| Office and Administrative Support Occupations (43-0000) | Rosser et al., 2020 <sup>33</sup>    | n=218 | Office Clerks, General                               | Cross-sectional survey | 04/20 - 05/20 | United States of America | 0%     | High     |
| Office and Administrative Support Occupations (43-0000) | Satpati et al., 2020 <sup>27</sup>   | n=47  | Office Clerks, General                               | Cross-sectional survey | 07/26 - 08/08 | India                    | 4.26%  | Moderate |
| Office and Administrative Support Occupations (43-0000) | Baracco et al., 2020 <sup>24</sup>   | n=194 | Office and Administrative Support Workers, All Other | Cross-sectional survey | 04/23 - 05/05 | Italy                    | 14.4%  | High     |
| Office and Administrative Support Occupations (43-0000) | Brzostek et al., 2020 <sup>151</sup> | n=286 | Office and Administrative Support Workers, All Other | Cross-sectional survey | 04/17 - 05/07 | United States of America | 45.5%  | Moderate |
| Office and Administrative Support Occupations (43-0000) | Kassem et al., 2020 <sup>72</sup>    | n=7   | Office and Administrative Support Workers, All Other | Cross-sectional survey | 06/01 - 06/14 | Egypt                    | 14.28% | High     |
| Office and Administrative Support Occupations (43-0000) | Kassem et al., 2020 <sup>72</sup>    | n=7   | Office and Administrative Support Workers, All Other | Cross-sectional survey | 06/01 - 06/14 | Egypt                    | 0%     | High     |
| Office and Administrative Support Occupations (43-0000) | Kassem et al., 2020 <sup>72</sup>    | n=7   | Office and Administrative Support Workers, All Other | Cross-sectional survey | 06/01 - 06/14 | Egypt                    | 0%     | High     |

|                                                             |                                     |        |                                                               |                        |               |                          |        |          |
|-------------------------------------------------------------|-------------------------------------|--------|---------------------------------------------------------------|------------------------|---------------|--------------------------|--------|----------|
| Office and Administrative Support Occupations (43-0000)     | Kassem et al., 2020 <sup>72</sup>   | n=7    | Office and Administrative Support Workers, All Other          | Cross-sectional survey | 06/01 - 06/14 | Egypt                    | 14.28% | High     |
| Farming, Fishing, and Forestry Occupations (45-0000)        | Satpati et al., 2020 <sup>27</sup>  | n=53   | Agricultural Workers                                          | Cross-sectional survey | 07/26 - 08/08 | India                    | 0%     | Moderate |
| Farming, Fishing, and Forestry Occupations (45-0000)        | Addetia et al., 2020 <sup>190</sup> | n=120  | Fishers and Related Fishing Workers                           | Retrospective cohort   | 05/01 - 05/31 | United States of America | 5%     | High     |
| Farming, Fishing, and Forestry Occupations (45-0000)        | Arnaldo et al., 2020 <sup>13</sup>  | n=80   | Fishers and Related Fishing Workers                           | Cross-sectional survey | 07/06 - 07/13 | Mozambique               | 5%     | High     |
| Construction and Extraction Occupations (47-0000)           | Biggs et al., 2020 <sup>3</sup>     | n=42   | Construction Trades Workers                                   | Cross-sectional survey | 04/28 - 05/03 | United States of America | 0%     | Moderate |
| Installation, Maintenance, and Repair Occupations (49-0000) | Blairon et al., 2020 <sup>52</sup>  | n=134  | Other Installation, Maintenance, and Repair Occupations       | Cross-sectional survey | 05/25 - 06/19 | Belgium                  | 16.4%  | High     |
| Production Occupations (51-0000)                            | Picon et al., 2020 <sup>191</sup>   | n=40   | Butchers and Other Meat, Poultry, and Fish Processing Workers | Cross-sectional survey | 06/13 - 06/17 | Brazil                   | 15%    | Moderate |
| Production Occupations (51-0000)                            | Picon et al., 2020 <sup>191</sup>   | n=1087 | Miscellaneous Food Processing Workers                         | Cross-sectional survey | 06/13 - 06/17 | Brazil                   | 1.47%  | Moderate |
| Production Occupations (51-0000)                            | Bontadi et al., 2020 <sup>192</sup> | n=1267 | Production Workers, All Other                                 | Cross-sectional survey | 04/11 - 04/29 | Italy                    | 1.58%  | High     |



|                                                          |                                      |       |                                                |                        |               |                          |                 |          |
|----------------------------------------------------------|--------------------------------------|-------|------------------------------------------------|------------------------|---------------|--------------------------|-----------------|----------|
| Production Occupations (51-0000)                         | Xu et al., 2020 <sup>193</sup>       | n=442 | Production Workers, All Other                  | Cross-sectional survey | 03/09 - 04/10 | China                    | 1.4% (0.6-2.9%) | High     |
| Transportation and Material Moving Occupations (53-0000) | Arnaldo et al., 2020 <sup>13</sup>   | n=248 | Transportation and Material Moving Occupations | Cross-sectional survey | 07/06 - 07/13 | Mozambique               | 4.8%            | High     |
| Transportation and Material Moving Occupations (53-0000) | Arnaldo et al., 2020 <sup>48</sup>   | n=367 | Transportation and Material Moving Occupations | Cross-sectional survey | 08/10 - 08/21 | Mozambique               | 7.4%            | High     |
| Transportation and Material Moving Occupations (53-0000) | Arnaldo et al., 2020 <sup>14</sup>   | n=112 | Transportation and Material Moving Occupations | Cross-sectional survey | 11/16 - 11/21 | Mozambique               | 16.1%           | High     |
| Transportation and Material Moving Occupations (53-0000) | Biggs et al., 2020 <sup>3</sup>      | n=14  | Transportation and Material Moving Occupations | Cross-sectional survey | 04/28 - 05/03 | United States of America | 0%              | Moderate |
| Transportation and Material Moving Occupations (53-0000) | Gudo et al., 2020 <sup>65</sup>      | n=554 | Transportation and Material Moving Occupations | Cross-sectional survey | 06/17 - 06/30 | Mozambique               | 3% (1-4%)       | High     |
| Transportation and Material Moving Occupations (53-0000) | Langa et al., 2020 <sup>181</sup>    | n=230 | Transportation and Material Moving Occupations | Cross-sectional survey | 09/28 - 10/09 | Mozambique               | 0.4%            | High     |
| Transportation and Material Moving Occupations (53-0000) | Mabunda et al., 2020 <sup>15</sup>   | n=473 | Transportation and Material Moving Occupations | Cross-sectional survey | 09/21 - 10/02 | Mozambique               | 8.7%            | High     |
| Transportation and Material Moving Occupations (53-0000) | Macicame et al., 2020 <sup>182</sup> | n=282 | Transportation and Material Moving Occupations | Cross-sectional survey | 09/14 - 09/30 | Mozambique               | 3.19%           | High     |

|                                                          |                                      |       |                                                                        |                        |               |                          |                  |          |
|----------------------------------------------------------|--------------------------------------|-------|------------------------------------------------------------------------|------------------------|---------------|--------------------------|------------------|----------|
| Transportation and Material Moving Occupations (53-0000) | Mahomed et al., 2020 <sup>81</sup>   | n=334 | Transportation and Material Moving Occupations                         | Cross-sectional survey | 08/31 - 10/12 | Mozambique               | 1.5%             | High     |
| Transportation and Material Moving Occupations (53-0000) | Mahumane et al., 2020 <sup>82</sup>  | n=287 | Transportation and Material Moving Occupations                         | Cross-sectional survey | 11/02 - 11/17 | Mozambique               | 1%               | High     |
| Transportation and Material Moving Occupations (53-0000) | Thani et al., 2020 <sup>183</sup>    | n=435 | Transportation and Material Moving Occupations                         | Cross-sectional survey | 07/26 - 09/09 | Qatar                    | 53.4%            | Moderate |
| Transportation and Material Moving Occupations (53-0000) | Halatoko et al., 2020 <sup>41</sup>  | n=212 | Air Transportation Workers                                             | Cross-sectional survey | 04/23 - 05/08 | Togo                     | 0.9%             | High     |
| Transportation and Material Moving Occupations (53-0000) | Viegas et al., 2020 <sup>110</sup>   | n=623 | Air Transportation Workers                                             | Cross-sectional survey | 08/03 - 08/21 | Mozambique               | 2.25%            | High     |
| Transportation and Material Moving Occupations (53-0000) | Viegas et al., 2020 <sup>110</sup>   | n=362 | Air Transportation Workers                                             | Cross-sectional survey | 08/03 - 08/21 | Mozambique               | 3.31%            | High     |
| Transportation and Material Moving Occupations (53-0000) | Khan et al., 2020 <sup>127</sup>     | n=57  | Ambulance Drivers and Attendants, Except Emergency Medical Technicians | Cross-sectional survey | 06/15 - 06/29 | India                    | 3.5% (0.9-13.3%) | Moderate |
| Transportation and Material Moving Occupations (53-0000) | Martinez et al., 2020 <sup>121</sup> | n=30  | Heavy and Tractor-Trailer Truck Drivers                                | Cross-sectional survey | 04/16 - 04/17 | United States of America | 16.67%           | High     |
| Transportation and Material Moving Occupations (53-0000) | Siddiqui et al., 2020 <sup>2</sup>   | n=9   | Heavy and Tractor-Trailer Truck Drivers                                | Prospective cohort     | 04/15 - 08/15 | India                    | 11.1%            | High     |

|                                                          |                                     |        |                                                        |                        |               |                            |                    |          |
|----------------------------------------------------------|-------------------------------------|--------|--------------------------------------------------------|------------------------|---------------|----------------------------|--------------------|----------|
| Transportation and Material Moving Occupations (53-0000) | Halatoko et al., 2020 <sup>41</sup> | n=122  | Taxi Drivers and Chauffeurs                            | Cross-sectional survey | 04/23 - 05/08 | Togo                       | 0.8%               | High     |
| Transportation and Material Moving Occupations (53-0000) | Poustchi et al., 2020 <sup>28</sup> | n=718  | Taxi Drivers and Chauffeurs                            | Cross-sectional survey | 04/17 - 06/02 | Iran (Islamic Republic of) | 14.1% (11.4-16.9%) | Moderate |
| Transportation and Material Moving Occupations (53-0000) | Alemu et al., 2020 <sup>6</sup>     | n=8    | Parking Lot Attendants                                 | Cross-sectional survey | 04/23 - 04/28 | Ethiopia                   | 12.5%              | Moderate |
| Transportation and Material Moving Occupations (53-0000) | Alemu et al., 2020 <sup>6</sup>     | n=110  | Laborers and Freight, Stock, and Material Movers, Hand | Cross-sectional survey | 04/23 - 04/28 | Ethiopia                   | 10%                | Moderate |
| Transportation and Material Moving Occupations (53-0000) | Khan et al., 2020 <sup>45</sup>     | n=97   | Laborers and Freight, Stock, and Material Movers, Hand | Cross-sectional survey | 07/01 - 07/15 | India                      | 2.1% (0.5-7.9%)    | Moderate |
| Transportation and Material Moving Occupations (53-0000) | Satpati et al., 2020 <sup>27</sup>  | n=63   | Laborers and Freight, Stock, and Material Movers, Hand | Cross-sectional survey | 07/26 - 08/08 | India                      | 12.7%              | Moderate |
| Not employed (mixed)*                                    | Carrat et al., 2020 <sup>4</sup>    | n=6295 | Unemployed                                             | Prospective cohort     | 05/04 - 06/23 | France                     | 4.9% (4.1-5.6%)    | Moderate |
| Not employed (mixed)*                                    | Carrat et al., 2020 <sup>4</sup>    | n=1457 | Unemployed                                             | Prospective cohort     | 05/04 - 06/23 | France                     | 8.3% (6.4-10%)     | Moderate |
| Not employed (mixed)*                                    | Carrat et al., 2020 <sup>4</sup>    | n=306  | Unemployed                                             | Prospective cohort     | 05/04 - 06/23 | France                     | 7.2% (2.3-11.1%)   | Moderate |
| Not employed (mixed)*                                    | Carrat et al., 2020 <sup>4</sup>    | n=125  | Unemployed                                             | Prospective cohort     | 05/04 - 06/23 | France                     | 3.8% (0.5-6.3%)    | Moderate |
| Not employed (mixed)*                                    | Carrat et al., 2020 <sup>4</sup>    | n=402  | Unemployed                                             | Prospective cohort     | 05/04 - 06/23 | France                     | 7.8% (4.7-10.4%)   | Moderate |

|                       |                                        |         |            |                        |               |                          |                    |          |
|-----------------------|----------------------------------------|---------|------------|------------------------|---------------|--------------------------|--------------------|----------|
| Not employed (mixed)* | Chamie et al., 2020 <sup>194</sup>     | n=230   | Unemployed | Cross-sectional survey | 04/25 - 04/28 | United States of America | 4.3%               | Moderate |
| Not employed (mixed)* | McLaughlin et al., 2020 <sup>195</sup> | n=241   | Unemployed | Cross-sectional survey | 05/04 - 05/19 | United States of America | 19.3% (14.6-24.5%) | Moderate |
| Not employed (mixed)* | Merkely et al., 2020 <sup>1</sup>      | n=1095  | Unemployed | Cross-sectional survey | 05/01 - 05/16 | Hungary                  | 0.43% (0.16-0.84%) | Moderate |
| Not employed (mixed)* | Munoz et al., 2020 <sup>196</sup>      | n=905   | Unemployed | Cross-sectional survey | 07/15 - 07/16 | Argentina                | 20%                | Moderate |
| Not employed (mixed)* | Richard et al., 2020 <sup>5</sup>      | n=549   | Unemployed | Cross-sectional survey | 04/06 - 06/30 | Switzerland              | 6%                 | Low      |
| Not employed (mixed)* | Satpati et al., 2020 <sup>27</sup>     | n=47    | Unemployed | Cross-sectional survey | 07/26 - 08/08 | India                    | 2.13%              | Moderate |
| Not employed (mixed)* | Ward et al., 2020 <sup>113</sup>       | n=59369 | Unemployed | Cross-sectional survey | 09/15 - 09/28 | The United Kingdom       | 3.35%              | Moderate |

1. Merkely B, Szabó AJ, Kosztin A, et al. Novel coronavirus epidemic in the Hungarian population, a cross-sectional nationwide survey to support the exit policy in Hungary. *GeroScience*. 2020;42(4):1063-1074. doi:10.1007/s11357-020-00226-9

2. Siddiqui S, Naushin S, Pradhan S, et al. SARS-CoV-2 antibody seroprevalence and stability in a tertiary care hospital-setting. *medRxiv*. Published online September 2020. doi:10.1101/2020.09.02.20186486

3. Biggs HM, Harris JB, Breakwell L, et al. Estimated Community Seroprevalence of SARS-CoV-2 Antibodies Two Georgia Counties, April 28-May 3, 2020. *MMWR Morbidity and Mortality Weekly Report*. 2020;69(29):965-970. doi:10.15585/mmwr.mm6929e2

4. Carrat F, Lamballerie X de, Rahib D, et al. Seroprevalence of SARS-CoV-2 among adults in three regions of France following the lockdown and associated risk factors: A multicohort study. *medRxiv*. Published online September 2020:2020.09.16.20195693. doi:10.1101/2020.09.16.20195693

5. Richard A, Wisniak A, Perez-Saez J, et al. Seroprevalence of anti-SARS-CoV-2 IgG antibodies, risk factors for infection and associated symptoms in Geneva, Switzerland: A population-based study. *medRxiv*. Published online December 2020. doi:10.1101/2020.12.16.20248180

6. Alemu BN, Addissie A, Mamo G, et al. *Sero-Prevalence of Anti-SARS-CoV-2 Antibodies in Addis Ababa, Ethiopia*. *Microbiology*; 2020. doi:10.1101/2020.10.13.337287

7. Brehm T, Schwinge D, Lampalzer S, et al. Seroprevalence of SARS-CoV-2 antibodies among hospital workers in a German tertiary care center: A sequential follow-up study. *International Journal of Hygiene and Environmental Health*. 2021;232:113671. doi:10.1016/j.ijheh.2020.113671

8. Iversen K, Bundgaard H, Hasselbalch RB, et al. Risk of COVID-19 in health-care workers in Denmark: An observational cohort study. *The Lancet Infectious diseases*. Published online August 2020. doi:10.1016/S1473-3099(20)30589-2

9. Lumley SF, O'Donnell D, Stoesser NE, et al. Antibody Status and Incidence of SARS-CoV-2 Infection in Health Care Workers. *New England Journal of Medicine*. Published online December 2020:NEJMoa2034545. doi:[10.1056/NEJMoa2034545](https://doi.org/10.1056/NEJMoa2034545)
10. Shakiba M, Nazemipour M, Salari A, et al. Seroprevalence of SARS-CoV-2 in Guilan Province, Iran, April 2020. *Emerging Infectious Disease journal*. 2021;27(2). doi:[10.3201/eid2702.201960](https://doi.org/10.3201/eid2702.201960)
11. Tilley K, Ayvazyan V, Martinez L, et al. A Cross-Sectional Study Examining the Seroprevalence of Severe Acute Respiratory Syndrome Coronavirus 2 Antibodies in a University Student Population. *Journal of Adolescent Health*. 2020;67(6):763-768. doi:[10.1016/j.jadohealth.2020.09.001](https://doi.org/10.1016/j.jadohealth.2020.09.001)
12. Tsitsilonis OE, Paraskevis D, Lianidou E, et al. Seroprevalence of Antibodies against SARS-CoV-2 among the Personnel and Students of the National and Kapodistrian University of Athens, Greece: A Preliminary Report. *Life*. 2020;10(9):214. doi:[10.3390/life10090214](https://doi.org/10.3390/life10090214)
13. Paulo Arnaldo. *Inquérito Sero-Epidemiológico de SARS-CoV-2 Na Cidade de Pemba (InCOVID 2020)*. República de Moçambique Ministério da Saúde; 2020.
14. Paulo Arnaldo. *Inquérito Sero-Epidemiológico de SARS-CoV-2 Nas Cidades de Xai-Xai E Chókwè (InCOVID 2020)*. República de Moçambique Ministério da Saúde; 2020.
15. Nedio Mabunda. *Inquérito Sero-Epidemiológico de SARS-CoV-2 Na Cidade de Beira (InCOVID 2020)*. República de Moçambique Ministério da Saúde; 2020.
16. Mussagy Mahomed. *Inquérito Sero-Epidemiológico de SARS-CoV-2 Na Cidade de Maxixe E Vila de Massinga (InCOVID 2020)*. República de Moçambique Ministério da Saúde; 2020.
17. Payne DC, Smith-Jeffcoat SE, Nowak G, et al. SARS-CoV-2 Infections and Serologic Responses from a Sample of U.S. Navy Service Members - USS Theodore Roosevelt, April 2020. *MMWR Morbidity and mortality weekly report*. 2020;69(23):714-721. doi:[10.15585/mmwr.mm6923e4](https://doi.org/10.15585/mmwr.mm6923e4)
18. COVID-19 Serology Tests Still Show Low Antibody Rate of 0.07%. *KBS World Radio*.
19. Favara DM, McAdam K, Cooke A, et al. SARS-CoV-2 antigen and antibody prevalence among UK staff working with cancer patients during the COVID-19 pandemic. *medRxiv*. Published online September 2020:2020.09.18.20197590. doi:[10.1101/2020.09.18.20197590](https://doi.org/10.1101/2020.09.18.20197590)
20. Galán MI, Velasco M, Casas ML, et al. Hospital-Wide SARS-CoV-2 seroprevalence in health care workers in a Spanish teaching hospital. *Enfermedades Infecciosas y Microbiología Clínica*. Published online December 2020:S0213005X20304183. doi:[10.1016/j.eimc.2020.11.015](https://doi.org/10.1016/j.eimc.2020.11.015)
21. Hunter BR, Dbeibo L, Weaver CS, et al. Seroprevalence of severe acute respiratory coronavirus virus 2 (SARS-CoV-2) antibodies among healthcare workers with differing levels of coronavirus disease 2019 (COVID-19) patient exposure. *Infection Control & Hospital Epidemiology*. Published online August 2020:1-2. doi:[10.1017/ice.2020.390](https://doi.org/10.1017/ice.2020.390)
22. Leidner R, Frary A, Cramer J, et al. Longitudinal SARS-CoV-2 serosurveillance of over ten thousand health care workers in the Providence Oregon cohort. *medRxiv*. Published online August 2020:2020.08.16.20176107. doi:[10.1101/2020.08.16.20176107](https://doi.org/10.1101/2020.08.16.20176107)
23. Martin CA, Patel P, Goss C, et al. Demographic and occupational determinants of anti-SARS-CoV-2 IgG seropositivity in hospital staff. *Journal of Public Health*. 2020;(fdaa199). doi:[10.1093/pubmed/fdaa199](https://doi.org/10.1093/pubmed/fdaa199)

24. Baracco A, Perotti G, Filippin A, et al. *SARS-CoV-2 Antibody Prevalence in Health Care Workers of Lodi Hospital, the COVID-19 Italian Epicentre*. Social Science Research Network; 2020.
25. Goenka M, Afzalpurkar S, Goenka U, et al. Seroprevalence of COVID-19 Amongst Health Care Workers in a Tertiary Care Hospital of a Metropolitan City from India. *The Journal of the Association of Physicians of India*. 2020;68(11):14-19.
26. Goenka MK, Shah BB, Goenka U, et al. COVID-19 prevalence among health-care workers of Gastroenterology department: An audit from a tertiary-care hospital in India. *JGH Open*. 2021;5(1):56-63. doi:[10.1002/jgh3.12447](https://doi.org/10.1002/jgh3.12447)
27. Satpati P, Sarangi S, Gantait K, et al. *Sero-Surveillance (IgG) of SARS-CoV-2 Among Asymptomatic General Population of Paschim Medinipur, West Bengal, India*. Infectious Diseases (except HIV/AIDS); 2020. doi:[10.1101/2020.09.12.20193219](https://doi.org/10.1101/2020.09.12.20193219)
28. Poustchi H, Darvishian M, Mohammadi Z, et al. SARS-CoV-2 antibody seroprevalence in the general population and high-risk occupational groups across 18 cities in Iran: A population-based cross-sectional study. *The Lancet Infectious Diseases*. 2020;0(0). doi:[10.1016/S1473-3099\(20\)30858-6](https://doi.org/10.1016/S1473-3099(20)30858-6)
29. Jones CR, Hamilton FW, Thompson A, Morris TT, Moran E. SARS-CoV-2 IgG seroprevalence in healthcare workers and other staff at North Bristol NHS Trust: A sociodemographic analysis. *Journal of Infection*. 2020;0(0). doi:[10.1016/j.jinf.2020.11.036](https://doi.org/10.1016/j.jinf.2020.11.036)
30. Anna F, Goyard S, Lalanne AI, et al. High seroprevalence but short-lived immune response to SARS-CoV-2 infection in Paris. *medRxiv*. Published online November 2020:2020.10.25.20219030. doi:[10.1101/2020.10.25.20219030](https://doi.org/10.1101/2020.10.25.20219030)
31. Erber J, Kappler V, Haller B, et al. Strategies for infection control and prevalence of anti-SARS-CoV-2 IgG in 4,554 employees of a university hospital in Munich, Germany. Published online October 2020. doi:[10.1101/2020.10.04.20206136](https://doi.org/10.1101/2020.10.04.20206136)
32. Hanrath AT, Loeff IS van der, Lendrem DW, et al. SARS-CoV-2 testing of 11,884 healthcare workers at an acute NHS hospital trust in England: A retrospective analysis. *medRxiv*. Published online December 2020:2020.12.22.20242362. doi:[10.1101/2020.12.22.20242362](https://doi.org/10.1101/2020.12.22.20242362)
33. Rosser JI, Röltgen K, Dymock M, et al. Severe acute respiratory coronavirus virus 2 (SARS-CoV-2) seroprevalence in healthcare personnel in northern California early in the coronavirus disease 2019 (COVID-19) pandemic. *Infection Control & Hospital Epidemiology*. Published online December 2020:1-7. doi:[10.1017/ice.2020.1358](https://doi.org/10.1017/ice.2020.1358)
34. Silva VO, de Oliveira EL, Castejon MJ, et al. Prevalence of antibodies against sars-cov-2 in professionals of a public health laboratory at são paulo, sp, brazil. *medRxiv*. Published online October 2020. doi:[10.1101/2020.10.19.20213421](https://doi.org/10.1101/2020.10.19.20213421)
35. Sabourin KR, Schultz J, Romero J, et al. Risk Factors of SARS-CoV-2 Antibodies in Arapahoe County First Responders - the COVID-19 Arapahoe SErosurveillance Study (CASES) Project. *Journal of Occupational and Environmental Medicine*. Published online December 2020. doi:[10.1097/JOM.0000000000002099](https://doi.org/10.1097/JOM.0000000000002099)
36. Yogo N, Greenwood KL, Thompson L, et al. Point prevalence survey to evaluate the seropositivity for coronavirus disease 2019 (COVID-19) among high-risk healthcare workers. *Infection Control and Hospital Epidemiology*. Published online December 2020:1-6. doi:[10.1017/ice.2020.1370](https://doi.org/10.1017/ice.2020.1370)
37. Figueiredo-Campos P, Blankenhaus B, Mota C, et al. Seroprevalence of anti-SARS-CoV-2 antibodies in COVID-19 patients and healthy volunteers up to 6 months post disease onset. *European Journal of Immunology*. 2020;50(12):2025-2040. doi:[10.1002/eji.202048970](https://doi.org/10.1002/eji.202048970)

38. Gonçalves J, Sousa RL, Jacinto MJ, et al. Evaluating SARS-CoV-2 Seroconversion Following Relieve of Confinement Measures. *Frontiers in Medicine*. 2020;7. doi:[10.3389/fmed.2020.603996](https://doi.org/10.3389/fmed.2020.603996)
39. Fontanet A, Grant R, Tondeur L, et al. SARS-CoV-2 infection in primary schools in northern France: A retrospective cohort study in an area of high transmission. *medRxiv*. Published online June 2020:2020.06.25.20140178. doi:[10.1101/2020.06.25.20140178](https://doi.org/10.1101/2020.06.25.20140178)
40. Torres JP, Piñera C, De La Maza V, et al. Severe Acute Respiratory Syndrome Coronavirus 2 Antibody Prevalence in Blood in a Large School Community Subject to a Coronavirus Disease 2019 Outbreak: A Cross-sectional Study. *Clinical Infectious Diseases*. Published online July 2020:ciaa955. doi:[10.1093/cid/ciaa955](https://doi.org/10.1093/cid/ciaa955)
41. Halatoko WA, KONU YR, Gbeasor-Komlanvi FA, et al. Prevalence of SARS-CoV-2 among high-risk populations in Lomé (Togo) in 2020. *medRxiv*. Published online August 2020:2020.08.07.20163840. doi:[10.1101/2020.08.07.20163840](https://doi.org/10.1101/2020.08.07.20163840)
42. Slusser S. MLB antibody study: 0.7% of those tested had been exposed to coronavirus. *San Francisco Chronicle*. Published online May 2020.
43. Vince A, Zadro R, Šostar Z, et al. SARS-CoV-2 Seroprevalence in a Cohort of Asymptomatic, RT-PCR Negative Croatian First League Football Players. *medRxiv*. Published online November 2020:2020.10.30.20223230. doi:[10.1101/2020.10.30.20223230](https://doi.org/10.1101/2020.10.30.20223230)
44. Mack D, Gärtner BC, Rössler A, et al. Prevalence of SARS-CoV-2 IgG antibodies in a large prospective cohort study of elite football players in Germany (May/June 2020): Implications for a testing protocol in asymptomatic individuals and estimation of the rate of undetected cases. *Clinical Microbiology and Infection*. 2020;27(3):473.e1-473.e4. doi:[10.1016/j.cmi.2020.11.033](https://doi.org/10.1016/j.cmi.2020.11.033)
45. Khan SMS, Qurieshi MA, Haq I, et al. Seroprevalence of SARS-CoV-2 specific IgG antibodies in District Srinagar, northern India A cross-sectional study. *PLOS ONE*. 2020;15(11):e0239303. doi:[10.1371/journal.pone.0239303](https://doi.org/10.1371/journal.pone.0239303)
46. Akinbami LJ, Vuong N, Petersen LR, et al. SARS-CoV-2 Seroprevalence among Healthcare, First Response, and Public Safety Personnel, Detroit Metropolitan Area, Michigan, USA, May/June 2020 - Volume 26, Number 12/December 2020 - Emerging Infectious Diseases journal - CDC. Published online December 2020. doi:[10.3201/eid2612.203764](https://doi.org/10.3201/eid2612.203764)
47. Amendola A, Tanzi E, Folgori L, et al. Low seroprevalence of SARS-CoV-2 infection among healthcare workers of the largest children hospital in Milan during the pandemic wave. *Infection Control & Hospital Epidemiology*. Published online August 2020:1-2. doi:[10.1017/ice.2020.401](https://doi.org/10.1017/ice.2020.401)
48. Paulo Arnaldo. *Inquérito Sero-Epidemiológico de SARS-CoV-2 Na Cidade de Quelimane (InCOVID 2020)*. República de Moçambique Ministério da Saúde; 2020.
49. Bal A, Brengel-Pesce K, Gaymard A, et al. Clinical and microbiological assessments of COVID-19 in healthcare workers: A prospective longitudinal study. *medRxiv*. Published online November 2020:2020.11.04.20225862. doi:[10.1101/2020.11.04.20225862](https://doi.org/10.1101/2020.11.04.20225862)
50. Fernández-Rivas G, Quirant-Sánchez B, González V, et al. Seroprevalence of SARS-CoV-2 IgG Specific Antibodies among Healthcare Workers in the Northern Metropolitan Area of Barcelona, Spain, after the first pandemic wave. *medRxiv*. Published online June 2020:2020.06.24.20135673. doi:[10.1101/2020.06.24.20135673](https://doi.org/10.1101/2020.06.24.20135673)
51. Bardai G, Ouellet J, Engelhardt T, Bertolizio G, Wu Z, Rauch F. Prevalence of SARS-CoV-2 infections in a pediatric orthopedic hospital. von Ungern-Sternberg B, ed. *Pediatric Anesthesia*. 2021;31(2):247-248. doi:[10.1111/pan.14047](https://doi.org/10.1111/pan.14047)



52. Blairon L, Mokrane S, Wilmet A, et al. Large-scale, molecular and serological SARS-CoV-2 screening of healthcare workers in a 4-site public hospital in Belgium after COVID-19 outbreak. *Journal of Infection*. Published online July 2020:S0163445320305144. doi:[10.1016/j.jinf.2020.07.033](https://doi.org/10.1016/j.jinf.2020.07.033)
53. Moreno Borraz LA, Giménez López M, Carrera Lasfuentes P, et al. Prevalencia de infección por coronavirus SARS-CoV-2 en pacientes y profesionales de un hospital de media y larga estancia en España. *Revista Española de Geriátría y Gerontología*. 2020;56(2):75-80. doi:[10.1016/j.regg.2020.10.005](https://doi.org/10.1016/j.regg.2020.10.005)
54. Brunner WM, Hirabayashi L, Krupa NL, et al. Severe acute respiratory coronavirus virus 2 (SARS-CoV-2) IgG results among healthcare workers in a rural upstate New York hospital system. *Infection Control & Hospital Epidemiology*. Published online October 2020:1-4. doi:[10.1017/ice.2020.1296](https://doi.org/10.1017/ice.2020.1296)
55. Carozzi FM, Cusi MG, Pistello M, et al. Detection of asymptomatic SARS-CoV-2 infections among healthcare workers: Results from a large-scale screening program based on rapid serological testing. *medRxiv*. Published online August 2020. doi:[10.1101/2020.07.30.20149567](https://doi.org/10.1101/2020.07.30.20149567)
56. Vilbic-Cavlek T, Stevanovic V, Tabain I, et al. Severe acute respiratory syndrome coronavirus 2 seroprevalence among personnel in the healthcare facilities of Croatia, 2020. *Revista da Sociedade Brasileira de Medicina Tropical*. 2020;53. doi:[10.1590/0037-8682-0458-2020](https://doi.org/10.1590/0037-8682-0458-2020)
57. Chibwana MG, Jere KC, kamng'ona R, et al. High SARS-CoV-2 seroprevalence in Health Care Workers but relatively low numbers of deaths in urban Malawi. *medRxiv*. Published online August 2020:2020.07.30.20164970. doi:[10.1101/2020.07.30.20164970](https://doi.org/10.1101/2020.07.30.20164970)
58. Coffman B. New Co-Immunity Project data show COVID-19 infection among health care workers may be lower than the general population | UofL News. *UofLNews*. Published online August 2020.
59. Cooper DJ, Lear S, Watson L, et al. A prospective study of risk factors associated with seroprevalence of SARS-CoV-2 antibodies in healthcare workers at a large UK teaching hospital. *medRxiv*. Published online November 2020:2020.11.03.20220699. doi:[10.1101/2020.11.03.20220699](https://doi.org/10.1101/2020.11.03.20220699)
60. Denyer S. Japanese firm's blanket testing of employees could serve as model. *LMT Online*. Published online June 2020.
61. Dimeglio C, Herin F, Miedougé M, et al. Screening for SARS-CoV-2 antibodies among healthcare workers in a university hospital in southern France. *Journal of Infection*. 2020;0(0). doi:[10.1016/j.jinf.2020.09.035](https://doi.org/10.1016/j.jinf.2020.09.035)
62. Fuereder T, Berghoff AS, Heller G, et al. SARS-CoV-2 seroprevalence in oncology healthcare professionals and patients with cancer at a tertiary care centre during the COVID-19 pandemic. *ESMO Open*. 2020;5(5). doi:[10.1136/esmoopen-2020-000889](https://doi.org/10.1136/esmoopen-2020-000889)
63. Fusco FM, Pisaturo M, Iodice V, et al. COVID-19 among healthcare workers in a specialist infectious diseases setting in Naples, Southern Italy: Results of a cross-sectional surveillance study. *Journal of Hospital Infection*. 2020;105(4):596-600. doi:[10.1016/j.jhin.2020.06.021](https://doi.org/10.1016/j.jhin.2020.06.021)
64. Geraci L. Antibody tests show just 2% exposure rate to COVID-19. *The Lancaster News*. Published online May 2020.
65. Eduardo Samo Gudo. *Inquérito Sero-epidemiológico de SARS-CoV-2 na Cidade de Nampula*. República de Moçambique Ministério da Saúde; 2020:19.
66. Hackner K, Errhalt P, Willheim M, et al. Diagnostic accuracy of two commercially available rapid assays for detection of IgG and IgM antibodies to SARS-CoV-2 compared to ELISA in a low-prevalence population. *Research Square*. Published online August 2020. doi:[10.21203/rs.3.rs-50887/v1](https://doi.org/10.21203/rs.3.rs-50887/v1)



67. Haq M, Rehman A, Noor M, et al. Seroprevalence and Risk Factors of SARS CoV-2 in Health Care Workers of Tertiary-Care Hospitals in the Province of Khyber Pakhtunkhwa, Pakistan. *medRxiv*. Published online September 2020:2020.09.29.20203125. doi:[10.1101/2020.09.29.20203125](https://doi.org/10.1101/2020.09.29.20203125)
68. He L, Zeng Y, Zeng C, et al. Positive Rate of Serology and RT-PCR for COVID-19 among healthcare workers during different periods in Wuhan, China. *Journal of Infection*. Published online August 2020. doi:[10.1016/j.jinf.2020.08.027](https://doi.org/10.1016/j.jinf.2020.08.027)
69. Herzberg J, Vollmer T, Fischer B, et al. Prospective Sero-epidemiological Evaluation of SARS-CoV-2 among Health Care Workers in a German Secondary Care Hospital. *International Journal of Infectious Diseases*. 2021;102:136-143. doi:[10.1016/j.ijid.2020.10.026](https://doi.org/10.1016/j.ijid.2020.10.026)
70. Jeremias A, Nguyen J, Levine J, et al. Prevalence of SARS-CoV-2 Infection Among Health Care Workers in a Tertiary Community Hospital. *JAMA Internal Medicine*. Published online August 2020. doi:[10.1001/jamainternmed.2020.4214](https://doi.org/10.1001/jamainternmed.2020.4214)
71. Jespersen S, Mikkelsen S, Greve T, et al. Severe Acute Respiratory Syndrome Coronavirus 2 Seroprevalence Survey Among 17 971 Healthcare and Administrative Personnel at Hospitals, Prehospital Services, and Specialist Practitioners in the Central Denmark Region. *Clinical Infectious Diseases*. Published online October 2020:ciaa1471. doi:[10.1093/cid/ciaa1471](https://doi.org/10.1093/cid/ciaa1471)
72. Kassem AM, Talaat H, Shawky S, et al. SARS-CoV-2 infection among healthcare workers of a gastroenterological service in a tertiary care facility. *Arab Journal of Gastroenterology*. 2020;21(3):151-155. doi:[10.1016/j.ajg.2020.07.005](https://doi.org/10.1016/j.ajg.2020.07.005)
73. Kern PM, Müller H-H, Menzel T, Weisser H. Studie zur Immunität gegen SARS-CoV-2: Keine signifikante humorale Immunität gegen SARS-CoV-2 im medizinischen Personal eines Klinikums der Maximalversorgung und in der Stadtregion Fulda. *Der Klinikarzt*. 2020;49(06):268-273. doi:[10.1055/a-1198-1243](https://doi.org/10.1055/a-1198-1243)
74. Khalil A, Hill R, Wright A, Ladhani S, O'Brien P. SARS-CoV-2-Specific Antibody Detection in Healthcare Workers in a UK Maternity Hospital: Correlation With SARS-CoV-2 RT-PCR Results. *Clinical Infectious Diseases*. 2020;(ciaa893). doi:[10.1093/cid/ciaa893](https://doi.org/10.1093/cid/ciaa893)
75. Kumar A, Sathyapalan D, Ramachandran A, Subhash K, Biswas L, Beena KV. SARS-CoV-2 antibodies in healthcare workers in a large university hospital, Kerala, India. *Clinical Microbiology and Infection*. 2021;27(3):481-483. doi:[10.1016/j.cmi.2020.09.013](https://doi.org/10.1016/j.cmi.2020.09.013)
76. Lackermair K, William F, Grzanna N, et al. Infection with SARS-CoV-2 in primary care health care workers assessed by antibody testing. *Family Practice*. Published online August 2020:cmaa078. doi:[10.1093/fampra/cmaa078](https://doi.org/10.1093/fampra/cmaa078)
77. Lahner E, Dilaghi E, Prestigiacomo C, et al. Prevalence of Sars-Cov-2 Infection in Health Workers (HWs) and Diagnostic Test Performance: The Experience of a Teaching Hospital in Central Italy. *International Journal of Environmental Research and Public Health*. 2020;17(12). doi:[10.3390/ijerph17124417](https://doi.org/10.3390/ijerph17124417)
78. Liu M, Cheng S-Z, Xu K-W, et al. Use of personal protective equipment against coronavirus disease 2019 by healthcare professionals in Wuhan, China: Cross sectional study. *BMJ*. 2020;369. doi:[10.1136/bmj.m2195](https://doi.org/10.1136/bmj.m2195)
79. Liu T, Wu S, Tao H, Zeng G, Zhou F, Wang X. Prevalence of IgG Antibodies to SARS-CoV-2 in Wuhan Implications for the Longevity of Antibodies Against SARS-CoV-2. *Research Square*. Published online November 2020. doi:[10.21203/rs.3.rs-99748/v1](https://doi.org/10.21203/rs.3.rs-99748/v1)
80. Lorenzo D, Carrisi C. COVID-19 exposure risk for family members of healthcare workers: An observational study. *International Journal of Infectious Diseases*. 2020;98:287-289. doi:[10.1016/j.ijid.2020.06.106](https://doi.org/10.1016/j.ijid.2020.06.106)

81. Mussagy Mahomed. *Inquérito Sero-Epidemiológico de SARS-CoV-2 Na Cidade de Tete (InCOVID 2020)*. República de Moçambique Ministério da Saúde; 2020.
82. Arlete Mahumane. *Inquérito Sero-Epidemiológico de SARS-CoV-2 Na Cidade de Chimoio (InCOVID 2020)*. República de Moçambique Ministério da Saúde; 2020.
83. Majdoubi A, Michalski C, O'Connell SE, et al. Antibody reactivity to SARS-CoV-2 is common in unexposed adults and infants under 6 months. *medRxiv*. Published online November 2020:2020.10.05.20206664. doi:[10.1101/2020.10.05.20206664](https://doi.org/10.1101/2020.10.05.20206664)
84. Majiya H, Aliyu-Paiko M, Balogu VT, et al. Seroprevalence of COVID-19 in Niger State. *medRxiv*. Published online August 2020. doi:[10.1101/2020.08.04.20168112](https://doi.org/10.1101/2020.08.04.20168112)
85. Fill Malfertheiner S, Brandstetter S, Roth S, et al. Immune response to SARS-CoV-2 in health care workers following a COVID-19 outbreak: A prospective longitudinal study. *Journal of Clinical Virology*. 2020;130:104575. doi:[10.1016/j.jcv.2020.104575](https://doi.org/10.1016/j.jcv.2020.104575)
86. Martin C, Montesinos I, Dauby N, et al. Dynamics of SARS-CoV-2 RT-PCR positivity and seroprevalence among high-risk healthcare workers and hospital staff. *Journal of Hospital Infection*. 2020;106(1):102-106. doi:[10.1016/j.jhin.2020.06.028](https://doi.org/10.1016/j.jhin.2020.06.028)
87. de Melo MS, Borges LP, de Souza DRV, et al. *Anti-SARS-CoV-2 IgM and IgG Antibodies in Health Workers in Sergipe, Brazil*. *Infectious Diseases (except HIV/AIDS)*; 2020. doi:[10.1101/2020.09.24.20200873](https://doi.org/10.1101/2020.09.24.20200873)
88. Morcuende M, Guglielminotti J, Landau R. Anesthesiologists' and Intensive Care Providers' Exposure to COVID-19 Infection in a New York City Academic Center: A Prospective Cohort Study Assessing Symptoms and COVID-19 Antibody Testing. *Anesthesia and analgesia*. 2020;131(3):669-676. doi:[10.1213/ANE.0000000000005056](https://doi.org/10.1213/ANE.0000000000005056)
89. Moscola J, Sembajwe G, Jarrett M, et al. Prevalence of SARS-CoV-2 Antibodies in Health Care Personnel in the New York City Area. *JAMA*. 2020;324(9):893-895. doi:[10.1001/jama.2020.14765](https://doi.org/10.1001/jama.2020.14765)
90. Nishida T, Iwahashi H, Yamauchi K, et al. Seroprevalence of SARS-CoV-2 Antibodies Among 925 Staff Members in an Urban Hospital Accepting COVID-19 Patients in Osaka Prefecture, Japan. *medRxiv*. Published online January 2020:2020.09.10.20191866. doi:[10.1101/2020.09.10.20191866](https://doi.org/10.1101/2020.09.10.20191866)
91. Olalla J, Correa AM, Martín-Escalante MD, et al. Search for asymptomatic carriers of SARS-CoV-2 in healthcare workers during the pandemic: A Spanish experience. *QJM: An International Journal of Medicine*. 2020;(hcaa238). doi:[10.1093/qjmed/hcaa238](https://doi.org/10.1093/qjmed/hcaa238)
92. Pallett SJC, Rayment M, Patel A, et al. Point-of-care serological assays for delayed SARS-CoV-2 case identification among health-care workers in the UK: A prospective multicentre cohort study. *The Lancet Respiratory Medicine*. 2020;8(9):885-894. doi:[10.1016/S2213-2600\(20\)30315-5](https://doi.org/10.1016/S2213-2600(20)30315-5)
93. Péré H, Wack M, Védie B, et al. Sequential SARS-CoV-2 IgG assays as confirmatory strategy to confirm equivocal results: Hospital-wide antibody screening in 3,569 staff health care workers in Paris. *Journal of Clinical Virology*. 2020;132:104617. doi:[10.1016/j.jcv.2020.104617](https://doi.org/10.1016/j.jcv.2020.104617)
94. Poulidakos D, Sinha S, Kalra PA. SARS-CoV-2 antibody screening in healthcare workers in a tertiary centre in North West England. *Journal of clinical virology : the official publication of the Pan American Society for Clinical Virology*. 2020;129:104545-104545. doi:[10.1016/j.jcv.2020.104545](https://doi.org/10.1016/j.jcv.2020.104545)
95. Psychogiou M, Karabinis A, Pavlopoulou I, et al. Antibodies against SARS-CoV-2 among health care workers in a country with low burden of COVID-19. *medRxiv*. Published online June 2020. doi:[10.1101/2020.06.23.20137620](https://doi.org/10.1101/2020.06.23.20137620)

96. Kolthur-Seetharam U, Shah D, Shastri J, et al. *SARS-CoV2 Serological Survey in Mumbai by NITI-BMC-TIFR: Preliminary Report of Round-2*. NITI-BMC-TIFR; 2020.
97. Shields AM, Faustini SE, Perez-Toledo M, et al. SARS-CoV-2 seroconversion in health care workers. *medRxiv*. Published online May 2020:2020.05.18.20105197. doi:[10.1101/2020.05.18.20105197](https://doi.org/10.1101/2020.05.18.20105197)
98. Ismael Amaral Silva PA, Ismael C, Marchon da Silva C, Domenge C. 1761P Universal screening of SARS-CoV-2 of oncology healthcare workers a Brazilian experience. *Annals of Oncology*. 2020;31:S1024. doi:[10.1016/j.annonc.2020.08.1825](https://doi.org/10.1016/j.annonc.2020.08.1825)
99. Solodky ML, Galvez C, Russias B, et al. Lower detection rates of SARS-COV2 antibodies in cancer patients versus health care workers after symptomatic COVID-19. *Annals of Oncology*. 2020;31(8):1087-1088. doi:[10.1016/j.annonc.2020.04.475](https://doi.org/10.1016/j.annonc.2020.04.475)
100. Soriano V, Meiriño R, Corral O, Guallar MP. Severe Acute Respiratory Syndrome Coronavirus 2 Antibodies in Adults in Madrid, Spain. *Clinical Infectious Diseases*. 2020;(c1aa769). doi:[10.1093/cid/c1aa769](https://doi.org/10.1093/cid/c1aa769)
101. Istituto Nazionale di Statistica. *PRIMI RISULTATI DELL'INDAGINE DI SIEROPREVALENZA SUL SARS-CoV-2*. Istituto Nazionale di Statistica; 2020.
102. Steensels D, Oris E, Coninx L, et al. Hospital-Wide SARS-CoV-2 Antibody Screening in 3056 Staff in a Tertiary Center in Belgium. *JAMA*. 2020;(7501160). doi:[10.1001/jama.2020.11160](https://doi.org/10.1001/jama.2020.11160)
103. Stock AD, Bader ER, Cezayirli P, et al. COVID-19 Infection Among Healthcare Workers: Serological Findings Supporting Routine Testing. *Frontiers in Medicine*. 2020;7. doi:[10.3389/fmed.2020.00471](https://doi.org/10.3389/fmed.2020.00471)
104. Takita M, Matsumura T, Yamamoto K, et al. Geographical Profiles of COVID-19 Outbreak in Tokyo: An Analysis of the Primary Care ClinicBased Point-of-Care Antibody Testing. *Journal of Primary Care & Community Health*. 2020;11:215013272094269. doi:[10.1177/2150132720942695](https://doi.org/10.1177/2150132720942695)
105. Tong X, Ning M, Huang R, et al. Surveillance of SARS-CoV-2 infection among frontline health care workers in Wuhan during COVID-19 outbreak. *Immunity, Inflammation and Disease*. 2020;8(4):840-843. doi:[10.1002/iid3.340](https://doi.org/10.1002/iid3.340)
106. Trieu M-C, Bansal A, Madsen A, et al. SARS-CoV-2 Specific Neutralizing Antibody Responses in Norwegian Health Care Workers After the First Wave of COVID-19 Pandemic: A Prospective Cohort Study. *The Journal of Infectious Diseases*. 2020;2021-(j1aa737). doi:[10.1093/infdis/j1aa737](https://doi.org/10.1093/infdis/j1aa737)
107. Tu D, Shu J, Wu X, et al. Immunological detection of serum antibodies in pediatric medical workers exposed to varying levels of SARS-CoV-2. *The Journal of Infection*. 2021;82(1):159-198. doi:[10.1016/j.jinf.2020.07.023](https://doi.org/10.1016/j.jinf.2020.07.023)
108. Valdivia A, Torres I, Huntley D, et al. Caveats in interpreting SARS-CoV-2 IgM+/IgG- antibody profile in asymptomatic health care workers. *Journal of Medical Virology*. 2020;n/a(n/a). doi:[10.1002/jmv.26400](https://doi.org/10.1002/jmv.26400)
109. Chafloque-Vasquez RA, Pampa-Espinoza L, Salinas JCC. Seroprevalence of COVID-19 in workers in a hospital in the Peruvian Amazon. *ACTA MEDICA PERUANA*. 2020;37(3). doi:[10.35663/amp.2020.373.1050](https://doi.org/10.35663/amp.2020.373.1050)
110. Edna Viegas. *Inquérito Sero-Epidemiológico de SARS-CoV-2 Na Cidade de Maputo (InCOVID 2020)*. República de Moçambique Ministério da Saúde; 2020.

111. Vlachoyiannopoulos P, Alexopoulos H, Apostolidi I, et al. Anti-SARS-CoV-2 antibody detection in healthcare workers of two tertiary hospitals in Athens, Greece. *Clinical Immunology*. 2020;221:108619. doi:[10.1016/j.clim.2020.108619](https://doi.org/10.1016/j.clim.2020.108619)
112. Dalla Volta A, Valcamonico F, Pedersini R, et al. The Spread of SARS-CoV-2 Infection Among the Medical Oncology Staff of ASST Spedali Civili of Brescia: Efficacy of Preventive Measures. *Frontiers in Oncology*. 2020;10:1574. doi:[10.3389/fonc.2020.01574](https://doi.org/10.3389/fonc.2020.01574)
113. Ward H, Cooke G, Atchison C, et al. Declining prevalence of antibody positivity to SARS-CoV-2: A community study of 365,000 adults. *medRxiv*. Published online October 2020:2020.10.26.20219725. doi:[10.1101/2020.10.26.20219725](https://doi.org/10.1101/2020.10.26.20219725)
114. Xiong S, Guo C, Dittmer U, Zheng X, Wang B. The prevalence of antibodies to SARS-CoV-2 in asymptomatic healthcare workers with intensive exposure to COVID-19. *medRxiv*. Published online June 2020:2020.05.28.20110767. doi:[10.1101/2020.05.28.20110767](https://doi.org/10.1101/2020.05.28.20110767)
115. Zhang J, Liu J, Li N, et al. Serological detection of 2019-nCoV respond to the epidemic: A useful complement to nucleic acid testing. *medRxiv*. Published online March 2020:2020.03.04.20030916. doi:[10.1101/2020.03.04.20030916](https://doi.org/10.1101/2020.03.04.20030916)
116. Zhao D, Wang M, Wang M, et al. Asymptomatic infection by SARS-CoV-2 in healthcare workers: A study in a large teaching hospital in Wuhan, China. *International Journal of Infectious Diseases*. 2020;99:219-225. doi:[10.1016/j.ijid.2020.07.082](https://doi.org/10.1016/j.ijid.2020.07.082)
117. Ahmad K, Rezvanizadeh V, Dahal S, et al. COVID-19 IgG/IgM antibody testing in Los Angeles County, California. *European Journal of Clinical Microbiology & Infectious Diseases*. Published online November 2020. doi:[10.1007/s10096-020-04111-3](https://doi.org/10.1007/s10096-020-04111-3)
118. Halbrook M, Gadoth A, Martin-Blais R, et al. Incidence of SARS-CoV-2 infection among asymptomatic frontline health workers in Los Angeles County, California. *medRxiv*. Published online November 2020:2020.11.18.20234211. doi:[10.1101/2020.11.18.20234211](https://doi.org/10.1101/2020.11.18.20234211)
119. Iwuji K, Islam E, Berdine G, Nugent K, Test V, Tijerina A. Prevalence of Coronavirus Antibody Among First Responders in Lubbock, Texas. *Journal of Primary Care & Community Health*. 11:2150132720971390. doi:[10.1177/2150132720971390](https://doi.org/10.1177/2150132720971390)
120. Parker-Magyar A. Few among Long Hill first responders test positive for COVID-19 antibodies. *Echoes Sentinel*. Published online June 2020.
121. Caban-Martinez AJ, Schaefer-Solle N, Santiago K, et al. Epidemiology of SARS-CoV-2 antibodies among firefighters/paramedics of a US fire department: A cross-sectional study. *Occupational and Environmental Medicine*. 2020;77(12):857-861. doi:[10.1136/oemed-2020-106676](https://doi.org/10.1136/oemed-2020-106676)
122. Staletovich J. South Florida Cities Begin Testing Employees For COVID-19 Antibodies. *WLRN*. Published online May 2020.
123. Hibino M, Iwabuchi S, Munakata H. SARS-CoV-2 IgG seroprevalence among medical staff in a general hospital that treated patients with COVID-19 in Japan: Retrospective evaluation of nosocomial infection control. *Journal of Hospital Infection*. 2020;107:103-104. doi:[10.1016/j.jhin.2020.10.001](https://doi.org/10.1016/j.jhin.2020.10.001)
124. Calcagno A, Ghisetti V, Emanuele T, et al. Risk for SARS-CoV-2 Infection in Healthcare Workers, Turin, Italy. *Emerging Infectious Diseases*. 2021;27(1):303-305. doi:[10.3201/eid2701.203027](https://doi.org/10.3201/eid2701.203027)
125. Alharbi SA, Almutairi AZ, Jan AA, Alkhalify AM. Enzyme-Linked Immunosorbent Assay for the Detection of Severe Acute Respiratory Syndrome Coronavirus 2 (SARS-CoV-2) IgM/IgA and IgG Antibodies Among Healthcare Workers. *Cureus*. Published online September 2020. doi:[10.7759/cureus.10285](https://doi.org/10.7759/cureus.10285)

126. Chau NVV, Toan LM, Man DNH, et al. Absence of SARS-CoV-2 antibodies in health care workers of a tertiary referral hospital for COVID-19 in southern Vietnam. *Journal of Infection*. 2020;82(1):e36-e37. doi:[10.1016/j.jinf.2020.11.018](https://doi.org/10.1016/j.jinf.2020.11.018)
127. Khan MS, Haq I, Qurieshi MA, et al. SARS-CoV-2 seroprevalence in healthcare workers of dedicated-COVID hospitals and nonCOVID hospitals of District Srinagar, Kashmir. *medRxiv*. Published online October 2020:2020.10.23.20218164. doi:[10.1101/2020.10.23.20218164](https://doi.org/10.1101/2020.10.23.20218164)
128. Costa SF, Giavina-Bianchi P, Buss L, et al. SARS-CoV-2 seroprevalence and risk factors among oligo/asymptomatic healthcare workers(HCW): Estimating the impact of community transmission. *Clinical Infectious Diseases*. 2020;(ciaa1845). doi:[10.1093/cid/ciaa1845](https://doi.org/10.1093/cid/ciaa1845)
129. Mohr N, Harland K, Krishnadasan A, Santibanez S, Talan D. Diagnosed and Undiagnosed COVID-19 in US Emergency Department Health Care Personnel: A Cross-sectional Analysis. *Annals of Emergency Medicine*. Published online December 2020. doi:[10.1016/j.annemergmed.2020.12.007](https://doi.org/10.1016/j.annemergmed.2020.12.007)
130. Noor M, Haq M, Ul Haq N, et al. Does Working in a COVID-19 Receiving Health Facility Influence Seroprevalence to SARS-CoV-2? *Cureus*. Published online November 2020. doi:[10.7759/cureus.11389](https://doi.org/10.7759/cureus.11389)
131. Singhal T, Shah S, Naik R, Kazi A, Thakkar P. Prevalence of COVID-19 Antibodies in Healthcare Workers at the Peak of the Pandemic in Mumbai, India: A Preliminary Study. *Indian Journal of Medical Microbiology*. 2020;38(3):461-463. doi:[10.4103/ijmm.IJMM\\_20\\_308](https://doi.org/10.4103/ijmm.IJMM_20_308)
132. Dacosta-Urbietta A, Rivero-Calle I, Pardo-Seco J, et al. Seroprevalence of SARS-CoV-2 Among Pediatric Healthcare Workers in Spain. *Frontiers in Pediatrics*. 2020;8. doi:[10.3389/fped.2020.00547](https://doi.org/10.3389/fped.2020.00547)
133. Sartore-Bianchi A, Patelli G, Tosi F, et al. INCIDENCE OF SARS-COV-2 INFECTION IN PATIENTS WITH ACTIVE CANCER: MONO-INSTITUTIONAL SERIES OF A COMPREHENSIVE CANCER INSTITUTION IN LOMBARDY DURING THE COVID-19 PANDEMIC (NIGUARDA CANCER CENTER, MILANO, ITALY). In: *Tumori Journal*. Vol 106. AIOM Abstracts.; 2020:1-215. doi:[10.1177/0300891620953388](https://doi.org/10.1177/0300891620953388)
134. Brousseau N, Morin L, Ouakki M, et al. *COVID-19 : Étude de séroprévalence chez des travailleurs de la santé de centres hospitaliers au Québec*. Institut National de Sante Publique du Quebec; 2020:20.
135. Chen Y, Tong X, Wang J, et al. High SARS-CoV-2 antibody prevalence among healthcare workers exposed to COVID-19 patients. *The Journal of Infection*. 2020;81(3):420-426. doi:[10.1016/j.jinf.2020.05.067](https://doi.org/10.1016/j.jinf.2020.05.067)
136. Favara DM, Cooke A, Doffinger R, McAdam K, Corrie P, Ainsworth NL. COVID-19 Serology in Oncology Staff Study: Understanding SARS-CoV-2 in the Oncology Workforce. *Clinical Oncology (Royal College of Radiologists (Great Britain))*. 2021;33(1):e61-e63. doi:[10.1016/j.clon.2020.07.015](https://doi.org/10.1016/j.clon.2020.07.015)
137. Fujita K, Shinpei Kada, Osamu Kanai, et al. Quantitative SARS-CoV-2 antibody screening of healthcare workers in the southern part of Kyoto city during the COVID-19 peri-pandemic period. *medRxiv*. Published online May 2020.
138. Godbout EJ, Pryor R, Harmon M, et al. Severe acute respiratory coronavirus virus 2 (SARS-CoV-2) seroprevalence among healthcare workers in a low prevalence region. *Infection Control & Hospital Epidemiology*. Published online December 2020:1-3. doi:[10.1017/ice.2020.1374](https://doi.org/10.1017/ice.2020.1374)
139. Houlihan CF, Vora N, Byrne T, et al. Pandemic peak SARS-CoV-2 infection and seroconversion rates in London frontline health-care workers. *The Lancet*. 2020;396(10246):e6-e7. doi:[10.1016/S0140-6736\(20\)31484-7](https://doi.org/10.1016/S0140-6736(20)31484-7)

140. Insúa C, Stedile G, Figueroa V, et al. Seroprevalence of SARS-CoV-2 antibodies among physicians from a children's hospital. *Archivos Argentinos De Pediatría*. 2020;118(6):381-385. doi:[10.5546/aap.2020.eng.381](https://doi.org/10.5546/aap.2020.eng.381)
141. Kohler PP, Kahlert CR, Sumer J, et al. Prevalence of SARS-CoV-2 antibodies among Swiss hospital workers: Results of a prospective cohort study. *Infection Control & Hospital Epidemiology*. Published online October 2020:1-5. doi:[10.1017/ice.2020.1244](https://doi.org/10.1017/ice.2020.1244)
142. Kumar N, Bhartiya S, Singh T. Duration of anti-SARS-CoV-2 antibodies much shorter in India. *Vaccine*. 2021;39(6):886-888. doi:[10.1016/j.vaccine.2020.10.094](https://doi.org/10.1016/j.vaccine.2020.10.094)
143. Mesnil M, Joubel K, Yavchitz A, Miklaszewski N, Devys J-M. Seroprevalence of SARS-Cov-2 in 646 professionals at the Rothschild Foundation Hospital (ProSeCoV study). *Anaesthesia Critical Care & Pain Medicine*. 2020;39(5):595-596. doi:[10.1016/j.accpm.2020.08.003](https://doi.org/10.1016/j.accpm.2020.08.003)
144. Missaglia R, Belingheri M, Antolini L, et al. SARS-CoV-2 pandemia in Lombardy: The impact on family Paediatricians. *Italian Journal of Pediatrics*. 2020;46(1):184. doi:[10.1186/s13052-020-00950-0](https://doi.org/10.1186/s13052-020-00950-0)
145. Orth-Höller D, Eigentler A, Weseslindtner L, Möst J. Antibody kinetics in primary- and secondary-care physicians with mild to moderate SARS-CoV-2 infection. *Emerging Microbes & Infections*. 2020;9(1):1692-1694. doi:[10.1080/22221751.2020.1793690](https://doi.org/10.1080/22221751.2020.1793690)
146. Plebani M, Padoan A, Fedeli U, et al. SARS-CoV-2 serosurvey in health care workers of the Veneto Region. *Clinical Chemistry and Laboratory Medicine (CCLM)*. 2020;58(12):2107-2111. doi:[10.1515/cclm-2020-1236](https://doi.org/10.1515/cclm-2020-1236)
147. Rudberg A-S, Havervall S, Månberg A, et al. SARS-CoV-2 exposure, symptoms and seroprevalence in healthcare workers in Sweden. *Nature Communications*. 2020;11(1):5064. doi:[10.1038/s41467-020-18848-0](https://doi.org/10.1038/s41467-020-18848-0)
148. Schmidt SB, Grüter L, Boltzmann M, Rollnik JD. Prevalence of serum IgG antibodies against SARS-CoV-2 among clinic staff. Adrish M, ed. *PLOS ONE*. 2020;15(6):e0235417. doi:[10.1371/journal.pone.0235417](https://doi.org/10.1371/journal.pone.0235417)
149. Sotgiu G, Barassi A, Miozzo M, et al. SARS-CoV-2 specific serological pattern in healthcare workers of an Italian COVID-19 forefront hospital. *BMC Pulmonary Medicine*. 2020;20(1):203. doi:[10.1186/s12890-020-01237-0](https://doi.org/10.1186/s12890-020-01237-0)
150. Venugopal U, Jilani N, Rabah S, et al. SARS-CoV-2 seroprevalence among health care workers in a New York City hospital: A cross-sectional analysis during the COVID-19 pandemic. *International Journal of Infectious Diseases*. 2020;102:63-69. doi:[10.1016/j.ijid.2020.10.036](https://doi.org/10.1016/j.ijid.2020.10.036)
151. Racine-Brzostek SE, Yang HS, Chadburn A, et al. COVID-19 Viral and Serology Testing in New York City Health Care Workers. *American Journal of Clinical Pathology*. 2020;154(5):592-595. doi:[10.1093/ajcp/aqaa142](https://doi.org/10.1093/ajcp/aqaa142)
152. Hoffmann S, Spallek J, Heinz-Detlef G, Schiebel J, Hufert F. Testing the backbone of the healthcare system: A prospective serological-epidemiological cohort study of healthcare workers in rural Germany. Published online September 2020. doi:[10.21203/rs.3.rs-84703/v1](https://doi.org/10.21203/rs.3.rs-84703/v1)
153. Patel MM, Thornburg NJ, Stubblefield WB, et al. Change in Antibodies to SARS-CoV-2 Over 60 Days Among Health Care Personnel in Nashville, Tennessee. *JAMA*. 2020;324(17):1781. doi:[10.1001/jama.2020.18796](https://doi.org/10.1001/jama.2020.18796)



154. Self WH, Tenforde MW, Stubblefield WB, et al. Seroprevalence of SARS-CoV-2 Among Frontline Health Care Personnel in a Multistate Hospital Network 13 Academic Medical Centers, April-June 2020. *MMWR Morbidity and Mortality Weekly Report*. 2020;69(35):1221-1226. doi:10.15585/mmwr.mm6935e2
155. Shah VP, Hainy CM, Swift MD, Breeher LE, Theel ES, Sampathkumar P. Unrecognized severe acute respiratory coronavirus virus 2 (SARS-CoV-2) seroprevalence among healthcare personnel in a low-prevalence area. *Infection Control & Hospital Epidemiology*. Published online November 2020:1-3. doi:10.1017/ice.2020.1341
156. Bampoe S, Lucas DN, Neall G, et al. A cross-sectional study of immune seroconversion to SARS-CoV-2 in front-line maternity health professionals. *medRxiv*. Published online June 2020. doi:10.1101/2020.06.24.20139352
157. Dimcheff DE, Schildhouse RJ, Hausman MS, et al. Seroprevalence of severe acute respiratory syndrome coronavirus-2 (SARS-CoV-2) infection among Veterans Affairs healthcare system employees suggests higher risk of infection when exposed to SARS-CoV-2 outside the work environment. *Infection Control & Hospital Epidemiology*:1-7. doi:10.1017/ice.2020.1220
158. Finkenzeller T, Faltlhauser A, Dietl K-H, et al. SARS-CoV-2-Antikörper bei Intensiv- und Klinikpersonal. *Medizinische Klinik - Intensivmedizin und Notfallmedizin*. 2020;115(3):139-145. doi:10.1007/s00063-020-00761-5
159. Grant JJ, Wilmore SMS, McCann NS, et al. Seroprevalence of SARS-CoV-2 antibodies in healthcare workers at a London NHS Trust. *Infection Control & Hospital Epidemiology*. Published online August 2020:1-3. doi:10.1017/ice.2020.402
160. Mansour M, Leven E, Muellers K, Stone K, Mendu DR, Wajnberg A. Prevalence of SARS-CoV-2 Antibodies Among Healthcare Workers at a Tertiary Academic Hospital in New York City. *Journal of General Internal Medicine*. 2020;35(8):2485-2486. doi:10.1007/s11606-020-05926-8
161. Martín V, Fernández-Villa T, Lamuedra Gil de Gomez M, et al. Prevalence of SARS-CoV-2 infection in general practitioners and nurses in primary care and nursing homes in the Healthcare Area of León and associated factors. *COVID19 en Atención Primaria*. 2020;46:35-39. doi:10.1016/j.semerg.2020.05.014
162. Meissner EG, Litwin C, Crocker T, Mack E, Card L. 460. Point-of-Care, In-Home SARS-CoV-2 IgG Antibody Testing to Assess Seroprevalence in At-Risk Health Care Workers. *Open Forum Infectious Diseases*. 2020;7(Supplement\_1):S297-S297. doi:10.1093/ofid/ofaa439.653
163. Mostafa A, Kandil S, El-Sayed MH, et al. Universal COVID-19 screening of 4040 health care workers in a resource-limited setting: An Egyptian pilot model in a university with 12 public hospitals and medical centers. *International Journal of Epidemiology*. 2020;(dyaa173). doi:10.1093/ije/dyaa173
164. Paradiso AV, Summa simona D, Silvestris N, et al. COVID-19 SCREENING AND MONITORING OF ASYMPTOMATIC HEALTH WORKERS WITH A RAPID SEROLOGICAL TEST. *medRxiv*. Published online May 2020:2020.05.05.20086017. doi:10.1101/2020.05.05.20086017
165. Sydney ER, Kishore P, Laniado I, Rucker LM, Bajaj K, Zinaman MJ. Antibody evidence of SARS-CoV-2 infection in healthcare workers in the Bronx. *Infection Control & Hospital Epidemiology*. 2020;41(11):1348-1349. doi:10.1017/ice.2020.437
166. Zhou F, Li J, Lu M, et al. Tracing asymptomatic SARS-CoV-2 carriers among 3674 hospital staff: A cross-sectional survey. *EClinicalMedicine*. 2020;26. doi:10.1016/j.eclinm.2020.100510
167. Buntinx F, Claes P, Gulikers M, et al. Added value of anti-SARS-CoV-2 antibody testing in a Flemish nursing home during an acute COVID-19 outbreak in April 2020. *Acta Clinica Belgica*. 2020;0(0):1-6. doi:10.1080/17843286.2020.1834285

168. Reuben J, Sherman A, Ellison JA, et al. SARS-CoV-2 Seroprevalence among First Responders in the District of Columbia, May July 2020. *medRxiv*. Published online November 2020:2020.11.25.20225490. doi:[10.1101/2020.11.25.20225490](https://doi.org/10.1101/2020.11.25.20225490)
169. Saberian P, Mireskandari SM, Baratloo A, et al. Antibody Rapid Test Results in Emergency Medical Services Personnel during COVID-19 Pandemic; a Cross Sectional study. *Archives of Academic Emergency Medicine*. 2020;9(1).
170. Tarabichi Y, Watts B, Collins T, et al. SARS-CoV-2 Infection among Serially Tested Emergency Medical Services Workers. *Prehospital Emergency Care*. 2020;0(0):1-7. doi:[10.1080/10903127.2020.1831668](https://doi.org/10.1080/10903127.2020.1831668)
171. Vijh R, Ghafari C, Hayden A, et al. Serological survey following SARS-COV-2 outbreaks at long-term care facilities in metro Vancouver, British Columbia: Implications for outbreak management and infection control policies. *American Journal of Infection Control*. Published online October 2020. doi:[10.1016/j.ajic.2020.10.009](https://doi.org/10.1016/j.ajic.2020.10.009)
172. Bhattacharya D, Winnett A, Fulcher JA, et al. 70. Lack of SARS-CoV-2 Antibody Seroconversion After Prompt Identification and Cohorting of Sentinel sars-cov-2-positive Residents in a Skilled Nursing Facility. *Open Forum Infectious Diseases*. 2020;7(Supplement\_1):S165-S166. doi:[10.1093/ofid/ofaa439.380](https://doi.org/10.1093/ofid/ofaa439.380)
173. Pérez-García F, Pérez-Zapata A, Arcos N, et al. Severe acute respiratory coronavirus virus 2 (SARS-CoV-2) infection among hospital workers in a severely affected institution in Madrid, Spain: A surveillance cross-sectional study. *Infection Control & Hospital Epidemiology*. Published online October 2020:1-7. doi:[10.1017/ice.2020.1303](https://doi.org/10.1017/ice.2020.1303)
174. Pérez-García F, Pérez-Zapata A, Arcos N, et al. Severe acute respiratory coronavirus virus 2 (SARS-CoV-2) infection among hospital workers in a severely affected institution in Madrid, Spain: A surveillance cross-sectional study. *Infection Control & Hospital Epidemiology*. 2021;42(7):803-809. doi:[10.1017/ice.2020.1303](https://doi.org/10.1017/ice.2020.1303)
175. Mughal MS, Kaur IP, Patton CD, Mikhail NH, Vareechon C, Granet KM. The prevalence of severe acute respiratory coronavirus virus 2 (SARS-CoV-2) IgG antibodies in intensive care unit (ICU) healthcare personnel (HCP) and its implicationsa single-center, prospective, pilot study. *Infection Control & Hospital Epidemiology*. Published online June 2020:1-2. doi:[10.1017/ice.2020.298](https://doi.org/10.1017/ice.2020.298)
176. Rao S. Covid-19: Jayadeva says its survey hints at herd immunity. *The Times of India*. Published online June 2020.
177. Shukla V, Lau CSM, Towns M, et al. COVID-19 Exposure Among First Responders in Arizona. *Journal of Occupational and Environmental Medicine*. 2020;62(12).
178. Gray A. Prevalence Of COVID-19 Antibodies In Washoe Co. Expected To Be Low. *KUNR*. Published online June 2020.
179. Chughtai O, Batoool H, Khan M, Chughtai A. Frequency of COVID-19 IgG Antibodies among Special Police Squad Lahore, Pakistan. *Journal of the College of Physicians and Surgeons Pakistan*. 2020;30(7):735-739. doi:[10.29271/jcpsp.2020.07.735](https://doi.org/10.29271/jcpsp.2020.07.735)
180. Gujski M, Jankowski M, Pinkas J, et al. Prevalence of Current and Past SARS-CoV-2 Infections among Police Employees in Poland, JuneJuly 2020. *Journal of Clinical Medicine*. 2020;9(10):3245. doi:[10.3390/jcm9103245](https://doi.org/10.3390/jcm9103245)
181. Jerónimo Langa. *Inquérito Sero-Epidemiológico de SARS-CoV-2 Na Cidade de Lichinga (InCOVID 2020)*. República de Moçambique Ministério da Saúde; 2020.



182. Ivalda Macicame. *Inquérito Sero-Epidemiológico de SARS-CoV-2 Na Província de Maputo (InCOVID 2020)*. República de Moçambique Ministério da Saúde; 2020.
183. Al-Thani MH, Farag E, Bertollini R, et al. Seroprevalence of SARS-CoV-2 infection in the craft and manual worker population of Qatar. *medRxiv*. Published online November 2020:2020.11.24.20237719. doi:10.1101/2020.11.24.20237719
184. Epstude J, Harsch IA. Seroprevalence of COVID-19 antibodies in the cleaning and oncological staff of a municipal clinic. *GMS Hygiene and Infection Control; 15:Doc18*. Published online July 2020. doi:10.3205/DGKH000353
185. Hassan SS, Seigerud Å, Mühr LSA, et al. SARS-CoV-2 infections among personnel providing home care services for the elderly in Stockholm, Sweden. *medRxiv*. Published online December 2020. doi:10.1101/2020.12.18.20248511
186. Ladhani SN, Jeffery-Smith A, Patel M, et al. High prevalence of SARS-CoV-2 antibodies in care homes affected by COVID-19: Prospective cohort study, England. *EClinicalMedicine*. 2020;28. doi:10.1016/j.eclinm.2020.100597
187. Lindahl JF, Hoffman T, Esmailzadeh M, et al. High seroprevalence of SARS-CoV-2 in elderly care employees in Sweden. *Infection Ecology & Epidemiology*. 2020;10(1):1789036. doi:10.1080/20008686.2020.1789036
188. Regan T. Fellowship Village Benefits from Covid-19 Antibody Tests. *Senior Housing News*. Published online June 2020.
189. Alali WQ, Bastaki H, Longenecker JC, et al. Seroprevalence of SARS-CoV-2 in migrant workers in Kuwait. *Journal of Travel Medicine*. 2020;(taaa223). doi:10.1093/jtm/taaa223
190. Addetia A, Crawford KHD, Dingens A, et al. Neutralizing Antibodies Correlate with Protection from SARS-CoV-2 in Humans during a Fishery Vessel Outbreak with a High Attack Rate. McAdam AJ, ed. *Journal of Clinical Microbiology*. 2020;58(11):e02107-20, /jcm/58/11/JCM.02107-20.atom. doi:10.1128/JCM.02107-20
191. Picon RV, Carreno I, da Silva AA, et al. Coronavirus disease 2019 population-based prevalence, risk factors, hospitalization, and fatality rates in southern Brazil. *International Journal of Infectious Diseases*. 2020;100:402-410. doi:10.1016/j.ijid.2020.09.028
192. D B, L B, P T, Pa P, A B, U L. Effectiveness of the measures aimed at containing Sars-cov-2 virus spreading in work settings: A survey in companies based in the Veneto region of Italy. *La Medicina del lavoro*. Published online October 2020. doi:10.23749/mdl.v111i5.10037
193. Xu X, Sun J, Nie S, et al. Seroprevalence of immunoglobulin M and G antibodies against SARS-CoV-2 in China. *Nature Medicine*. 2020;26(8):1193-1195. doi:10.1038/s41591-020-0949-6
194. Chamie G, Marquez C, Crawford E, et al. Community Transmission of Severe Acute Respiratory Syndrome Coronavirus 2 Disproportionately Affects the Latinx Population During Shelter-in-Place in San Francisco. *Clinical Infectious Diseases*. Published online August 2020:ciaa1234. doi:10.1093/cid/ciaa1234
195. McLaughlin C, Doll MK, Morrison KT, et al. High Community SARS-CoV-2 Antibody Seroprevalence in a Ski Resort Community, Blaine County, Idaho, US. Preliminary Results. *medRxiv*. Published online July 2020. doi:10.1101/2020.07.19.20157198
196. Muñoz L, Pifano M, Bolzán A, et al. *Surveillance and Seroprevalence: Evaluation of IgG Antibodies for SARS-Cov2 by ELISA in the Popular Neighborhood Villa Azul, Quilmes, Province of Buenos Aires, Argentina.*; 2020. doi:10.1590/SciELOPreprints.1147
